# Supplementary material for: Genetic, epigenetic, and environmental mechanisms govern allele-specific gene expression
Source: HighWire-hosted journal article supplement (doi:10.1101/gr.276193.121), 2022-05-02
Supplement: Supplemental_Table_S2.xlsx [file Supplemental_Table_S2.xlsx]

## Sheet: README
Supplemental Table S2: Allele-specific expression analyses for all contexts in HYP.
Full summary statistics for all environmental context analyses in HYP. Each gene’s allelic genotype (AG) and parent-of-origin (PO) effects on ASE were jointly estimated with a generalized linear model and the magnitude of its ASE biases were quantified (see Methods). For both AG and PO terms, the tables include the log2 fold-changes, log2 counts-per-million, likelihood ratios, raw p-values, effec…
Each sheet contains a separate diet-by-sex context analysis.
HYP_ALL	All contexts collapsed in HYP
HYP_HighFat	High fat-fed diet in HYP
HYP_LowFat	Low fat-fed diet in HYP
HYP_Females	Females in HYP
HYP_Males	Males in HYP
HYP_HF	High fat-fed females in HYP
HYP_HM	High fat-fed males in HYP
HYP_LF	Low fat-fed females in HYP
HYP_LM	Low fat-fed males in HYP

## Sheet: HYP_All
genes	AG_logFC	AG_logCPM	AG_LR	AG_pval	PO_logFC	PO_logCPM	PO_LR	PO_pval	AGE	POE	AG_adj_pval	PO_adj_pval
0610009B22Rik	-0.0173767	6.13684	0.0614441	0.804228	-0.0763859	6.13684	1.18613	0.276111	0.0121301	-0.0196308	0.813421	0.300728
0610009O20Rik	-0.104539	7.26938	4.83933	0.0278177	-0.0666621	7.26938	1.96763	0.1607	0.0416116	-0.016776	0.0356249	0.18179
0610010K14Rik	-0.101925	5.62752	1.56069	0.211564	-0.104726	5.62752	1.64751	0.199298	0.0419122	-0.0312395	0.233625	0.221816
1110002L01Rik	-0.37246	3.25068	3.71973	0.053773	-0.0139277	3.25068	0.00499133	0.943677	0.132705	0.00837547	0.0656116	0.946254
1110004E09Rik	0.0217689	6.76031	0.127223	0.721329	-0.119821	6.76031	3.85287	0.049661	-0.00239626	-0.0351528	0.733761	0.0602781
1110008F13Rik	-0.119558	7.64369	7.62121	0.00576858	-0.0285646	7.64369	0.435073	0.50951	0.0464039	-0.00434469	0.00830055	0.531291
1110008J03Rik	-0.302383	3.26755	3.78025	0.0518609	-0.00473497	3.26755	0.00100846	0.974666	0.112064	0.00717272	0.0635143	0.976042
1110032A03Rik	0.516273	6.89167	75.8914	2.997e-18	-0.0783297	6.89167	1.74846	0.186071	-0.171837	-0.0202221	0	0.208277
1110035H17Rik	0.227625	4.28216	2.41763	0.119976	-0.182946	4.28216	1.55551	0.212324	-0.0786648	-0.0520735	0.138261	0.235282
1110038B12Rik	-0.0577592	5.17231	0.507664	0.476152	-0.0267231	5.17231	0.108599	0.741745	0.027608	-0.00361893	0.497074	0.754601
1110057K04Rik	-0.121858	6.88268	6.44727	0.0111123	0.0219268	6.88268	0.208698	0.64779	0.0468269	0.0134655	0.015122	0.664375
1110059E24Rik	-0.0871907	6.68173	1.84165	0.174758	0.00388172	6.68173	0.00364953	0.951828	0.0357074	0.00766005	0.195409	0.954022
1110059G10Rik	-0.053602	4.47539	0.27509	0.599938	0.212634	4.47539	4.33709	0.0372906	0.0250668	0.077366	0.617137	0.0460169
1190002N15Rik	0.119846	7.22195	7.2999	0.00689583	0.00298441	7.22195	0.00453626	0.946302	-0.0364326	0.0070597	0.0097175	0.948679
1200014J11Rik	-0.178549	4.37788	2.13122	0.144326	-0.0973705	4.37788	0.631853	0.426676	0.0719193	-0.0256387	0.163949	0.450389
1500002C15Rik	0.0683314	3.28238	0.191423	0.661735	-0.0699439	3.28238	0.201135	0.653807	-0.0112574	-0.0210493	0.676654	0.670271
1500009C09Rik	-0.55822	9.20576	560.291	7.26699e-124	-0.00232446	9.20576	0.00972071	0.921461	0.196015	0.00492069	0	0.924961
1500011B03Rik	0.377943	5.37687	24.3056	8.22013e-07	-0.0247476	5.37687	0.103501	0.747668	-0.125088	-0.00220351	0	0.76003
1500011K16Rik	-0.576542	4.92268	38.3753	5.83668e-10	0.244244	4.92268	6.86595	0.00878534	0.198972	0.0889039	0	0.0120811
1600012H06Rik	-0.257997	4.06015	6.2093	0.0127081	-0.00889443	4.06015	0.00751846	0.930903	0.0935574	0.00729068	0.0171809	0.934113
1600014C10Rik	-0.321685	6.62608	32.8303	1.00566e-08	-0.0837038	6.62608	2.22293	0.135975	0.114756	-0.0222037	0	0.155368
1700003E16Rik	-0.150498	3.34576	0.757891	0.383989	0.0945021	3.34576	0.296528	0.586067	0.0586212	0.0352178	0.406511	0.605011
1700003M02Rik	-0.00599382	4.34135	0.00162103	0.967884	-0.0175945	4.34135	0.0146052	0.903808	0.0038181	0.000656949	0.969499	0.908067
1700003M07Rik	-0.146795	3.61993	0.71335	0.398334	0.144273	3.61993	0.691617	0.405615	0.0514671	0.0585439	0.420716	0.429614
1700006P19Rik	-0.149813	6.14897	5.22994	0.0222014	-0.0575404	6.14897	0.771542	0.37974	0.0571916	-0.0142899	0.0287502	0.404224
1700012B09Rik	-0.0514242	3.78366	0.0808703	0.776122	-0.166687	3.78366	0.853886	0.355455	0.00947125	-0.0493296	0.786514	0.380423
1700012B15Rik	0.150505	6.72304	6.76979	0.00927139	0.0222278	6.72304	0.147666	0.700776	-0.0466554	0.0145336	0.0127555	0.715196
1700016P03Rik	0.203077	3.81002	2.36088	0.124412	-0.0856917	3.81002	0.418079	0.517897	-0.066489	-0.0212491	0.143091	0.538752
1700019D03Rik	-1.81742	4.88091	263.976	2.33226e-59	-0.0164018	4.88091	0.0217886	0.882651	0.561538	-0.00451248	0	0.88825
1700019G17Rik	-0.42855	3.21815	7.47148	0.0062684	-0.114616	3.21815	0.53543	0.464333	0.146809	-0.0382799	0.00892767	0.487247
1700020I14Rik	0.105507	10.5787	53.4953	2.59212e-13	-0.0314509	10.5787	4.75363	0.0292366	-0.0307274	-0.00440636	0	0.0369679
1700021K19Rik	-0.0441629	8.88411	2.04409	0.152798	-0.0412763	8.88411	1.78562	0.181461	0.0205864	-0.00810369	0.172619	0.203405
1700022I11Rik	0.312815	7.72633	83.2825	7.11276e-20	-0.0318177	7.72633	0.861207	0.353401	-0.103031	-0.00478767	0	0.378388
1700025G04Rik	0.205032	8.66387	42.8569	5.88949e-11	-0.00957757	8.66387	0.0935456	0.759717	-0.0656039	0.00278987	0	0.771413
1700026D08Rik	0.332936	4.30157	4.68559	0.0304166	-0.143365	4.30157	0.871534	0.350531	-0.109112	-0.0442251	0.038657	0.375533
1700028K03Rik	0.127724	6.86573	6.00469	0.0142679	-0.0309716	6.86573	0.353237	0.552286	-0.0384935	-0.00674996	0.0191037	0.572069
1700028P14Rik	-0.276868	3.99169	3.17982	0.0745532	-0.306012	3.99169	3.87986	0.0488686	0.101439	-0.0947695	0.0889277	0.0593344
1700030J22Rik	0.190948	4.54978	3.61923	0.0571152	0.198732	4.54978	3.92131	0.0476776	-0.0600676	0.075243	0.069401	0.058021
1700034J05Rik	0.477243	3.36745	8.51316	0.00352587	0.378951	3.36745	5.35242	0.0206935	-0.148281	0.124754	0.00524183	0.0267446
1700049G17Rik	0.273376	5.84273	5.51654	0.0188375	0.0406525	5.84273	0.121903	0.72698	-0.0850986	0.0194115	0.0246354	0.740444
1700058G18Rik	-0.230851	5.42987	9.19432	0.00242767	-0.0509969	5.42987	0.448691	0.502957	0.0841396	-0.012638	0.0037243	0.524973
1700066M21Rik	-0.319692	5.2038	17.3753	3.06783e-05	0.0753074	5.2038	0.962239	0.326623	0.115363	0.0304179	4.43721e-05	0.351957
1700086D15Rik	-0.103717	4.87353	0.856817	0.354631	0.169325	4.87353	2.27614	0.131378	0.0456602	0.0598249	0.377403	0.15041
1700110K17Rik	-0.167882	3.55492	1.21048	0.271238	0.0322429	3.55492	0.0448513	0.832278	0.0672237	0.0184823	0.294445	0.840231
1700121F15Rik	0.14186	4.49514	1.78658	0.181344	-0.113469	4.49514	1.14367	0.284878	-0.0450361	-0.0357857	0.202151	0.309611
1700123O20Rik	0.368699	4.88323	21.4781	3.57884e-06	0.0063703	4.88323	0.00622125	0.937132	-0.123111	0.00790536	0	0.939902
1810009N23Rik	0.66317	3.8718	34.3842	4.5239e-09	-0.0151656	3.8718	0.0165126	0.897752	-0.218567	0.00653811	0	0.902476
1810032O08Rik	-0.522481	3.46706	8.84769	0.0029346	-0.273407	3.46706	2.4091	0.120632	0.174531	-0.0770916	0.00444313	0.139012
1810037I17Rik	0.384547	7.72505	73.229	1.15448e-17	-0.10998	7.72505	5.99494	0.014347	-0.127098	-0.0317345	0	0.0189558
1810058I24Rik	-0.649722	4.53389	47.1229	6.66716e-12	-0.074131	4.53389	0.611309	0.434295	0.225579	-0.0162178	0	0.457846
1810058N05Rik	0.243992	4.39337	4.59345	0.0320943	0.057213	4.39337	0.25298	0.614984	-0.0785358	0.0252488	0.0405916	0.63288
1810062O18Rik	0.301967	4.39349	3.86484	0.049308	0.179623	4.39349	1.36256	0.243095	-0.0892006	0.0548566	0.0606952	0.266999
2010015L04Rik	-1.09184	4.7468	53.373	2.75867e-13	0.111769	4.7468	0.563497	0.452855	0.345089	0.0329359	0	0.476048
2010107G23Rik	-0.0552395	6.31615	1.07386	0.300076	0.0584274	6.31615	1.20126	0.27307	0.0248014	0.0261668	0.323426	0.297773
2010300C02Rik	0.0513672	4.39092	0.212459	0.644847	0.0298304	4.39092	0.072028	0.788407	-0.0126684	0.0228704	0.660601	0.798763
2210015D19Rik	0.0196837	5.69787	0.0501146	0.822864	0.0635294	5.69787	0.522527	0.469766	-0.00156836	0.0299633	0.831321	0.492696
2210016F16Rik	-0.156797	3.03624	1.04097	0.307595	-0.0456258	3.03624	0.0888861	0.765598	0.0592544	-0.0202711	0.330744	0.776965
2210018M11Rik	-0.138223	4.34879	0.931454	0.334485	-0.0748625	4.34879	0.273899	0.600728	0.0472844	-0.0199296	0.35735	0.619101
2210408I21Rik	0.35209	5.49959	16.368	5.21572e-05	-0.0360081	5.49959	0.170774	0.679424	-0.115622	-0.00496869	7.69117e-05	0.69464
2210411M09Rik	0.411077	3.84766	14.6736	0.000127825	-0.103901	3.84766	0.937746	0.332858	-0.133769	-0.0355753	0.000180447	0.358101
2310039H08Rik	0.00990398	3.80954	0.00664551	0.935028	0.0728624	3.80954	0.348534	0.554944	-0.00686612	0.0345434	0.93782	0.574714
2310047M10Rik	0.0242315	5.35183	0.104853	0.746081	0.0339872	5.35183	0.206202	0.64976	-0.00403836	0.0193442	0.757962	0.666239
2310058D17Rik	0.775874	4.1815	51.3132	7.87436e-13	0.151634	4.1815	1.95131	0.162445	-0.256771	0.0553925	0	0.183636
2310061I04Rik	-0.101827	6.1944	3.09423	0.0785703	-0.0258821	6.1944	0.199779	0.654899	0.0408004	-0.000929695	0.0932909	0.671273
2310067B10Rik	0.268476	3.34493	1.76397	0.18413	0.0104215	3.34493	0.0033897	0.953572	-0.0788773	0.0117623	0.205135	0.955702
2410002F23Rik	-1.57334	8.16347	1636.8	0	-0.0333007	8.16347	0.738105	0.390269	0.500117	-0.00451704	0	0.414433
2410004N09Rik	0.185754	5.07944	4.02232	0.0449019	0.00050003	5.07944	3.08429e-05	0.995569	-0.0562683	0.00908354	0.0556486	0.995826
2410127L17Rik	-0.765347	4.11057	21.2637	4.00248e-06	-0.174763	4.11057	1.10362	0.293473	0.252933	-0.0488918	2.95814e-06	0.318417
2410131K14Rik	-0.460507	6.7946	79.283	5.38215e-19	-0.00369988	6.7946	0.00513067	0.942897	0.163211	0.00506676	0	0.945547
2510009E07Rik	0.178657	6.64245	11.0196	0.000901537	-0.0809795	6.64245	2.2638	0.132429	-0.0558455	-0.0215939	0.00140216	0.151504
2610002J02Rik	0.429777	5.07416	25.5776	4.24939e-07	-0.0437279	5.07416	0.264542	0.607017	-0.137999	-0.00555713	0	0.625094
2610019F03Rik	-0.416915	6.63396	49.207	2.30326e-12	-0.0949031	6.63396	2.55011	0.110286	0.148081	-0.025671	0	0.127928
2610035D17Rik	0.438328	5.62659	27.6104	1.48378e-07	-0.012867	5.62659	0.023976	0.876946	-0.144041	0.00148708	0	0.882807
2610035F20Rik	-0.46552	3.14787	5.92919	0.0148921	-0.0549755	3.14787	0.085178	0.770399	0.153742	-0.0124974	0.0198639	0.781523
2610044O15Rik8	0.129661	4.89204	1.45461	0.22779	-0.0610385	4.89204	0.320832	0.571108	-0.0452358	-0.0102482	0.250782	0.590099
2610203C20Rik	2.77603	4.85903	566.537	3.18201e-125	0.0571087	4.85903	0.224658	0.635514	-0.735252	0.00501574	0	0.652661
2610206C17Rik	-0.818694	3.40551	27.1294	1.90278e-07	-0.203555	3.40551	1.6677	0.196567	0.28625	-0.0646042	0	0.219042
2610301B20Rik	-0.020123	7.17403	0.178806	0.672402	-0.110989	7.17403	5.43905	0.0196913	0.0111034	-0.0313532	0.687005	0.0254252
2610507B11Rik	0.139519	8.06702	13.6524	0.000219955	-0.0184589	8.06702	0.239006	0.624925	-0.0422719	0.000273044	0.00033427	0.642346
2610524H06Rik	0.0322314	4.02704	0.0623419	0.802832	-0.0238636	4.02704	0.0344243	0.852807	-0.00614088	-0.00687076	0.811983	0.859536
2700060E02Rik	-0.066923	8.31658	4.03599	0.0445397	-0.0293583	8.31658	0.776741	0.37814	0.0282516	-0.00412703	0.0551634	0.402662
2700062C07Rik	-8.099	5.26539	1791.53	0	0.59587	5.26539	3.13367	0.0766909	0.994546	0.00276569	0	0.0908386
2700089E24Rik	-0.124428	9.58097	33.9543	5.64204e-09	-0.037328	9.58097	3.05608	0.0804353	0.0486246	-0.00690088	0	0.0950688
2700097O09Rik	0.58298	4.24082	18.0062	2.20187e-05	-0.00473136	4.24082	0.00127788	0.971484	-0.186824	0.000227579	2.95814e-05	0.972859
2810001G20Rik	0.316489	3.1042	2.09076	0.148192	-0.141092	3.1042	0.413456	0.520221	-0.0988401	-0.0335891	0.167943	0.541056
2810021J22Rik	0.0407186	5.0176	0.197355	0.656864	-0.00909941	5.0176	0.00981712	0.921074	-0.00837759	0.00404891	0.672105	0.924603
2810025M15Rik	-2.36075	6.24758	644.456	3.58696e-142	0.00825625	6.24758	0.00847541	0.926649	0.672239	0.00472319	0	0.92993
2810032G03Rik	-0.125067	4.90924	1.63812	0.200583	-0.0277389	4.90924	0.0803745	0.77679	0.0520699	-0.00312922	0.222195	0.787514
2810055G20Rik	0.231725	4.17816	2.26884	0.131999	-0.0393651	4.17816	0.065963	0.797308	-0.0798133	-0.0145607	0.151102	0.807313
2810403A07Rik	-0.288251	5.533	11.3598	0.00075049	0.0776233	5.533	0.824203	0.363954	0.100589	0.0323631	0.00119805	0.389052
2810408M09Rik	-0.326175	3.82212	8.03417	0.0045903	0.0644303	3.82212	0.313718	0.575408	0.118276	0.0326218	0.0067209	0.594329
2900097C17Rik	0.215862	8.72927	76.7979	1.89374e-18	-0.0106536	8.72927	0.187028	0.665402	-0.0692255	0.00215578	0	0.681373
3010026O09Rik	-0.0572461	4.22058	0.131507	0.716875	0.201949	4.22058	1.63268	0.201333	0.0239507	0.0714695	0.729315	0.224017
3110001D03Rik	0.169704	5.08528	3.54575	0.0596982	-0.0402412	5.08528	0.199142	0.655414	-0.0518317	-0.00814508	0.0723384	0.671741
3110002H16Rik	0.0743897	5.58917	0.716183	0.397399	-0.0102949	5.58917	0.0136741	0.90691	-0.0188763	0.00463862	0.419793	0.911025
3110040N11Rik	-0.41364	4.7691	13.6965	0.000214856	0.0360938	4.7691	0.103959	0.747129	0.143069	0.0176329	0.000331312	0.759444
3110043O21Rik	0.353004	7.86195	109.209	1.46048e-25	-0.0331681	7.86195	0.963924	0.3262	-0.116292	-0.00489733	0	0.351587
3110047P20Rik	-0.0207661	3.48143	0.0208434	0.885206	-0.0918683	3.48143	0.416313	0.518783	0.0101317	-0.0204913	0.890898	0.539556
3110052M02Rik	-0.471643	4.18442	11.2568	0.000793334	0.406538	4.18442	8.35479	0.00384673	0.153816	0.128563	0.00125721	0.0055406
3110053B16Rik	-2.29069	3.65412	36.9795	1.19376e-09	0.225652	3.65412	0.436829	0.508657	0.584967	0.051248	0	0.53041
3110056K07Rik	-0.193049	6.92822	13.6419	0.00022119	-0.0275971	6.92822	0.278785	0.597498	0.0721413	-0.00334709	0.00033427	0.616036
3110082I17Rik	0.332079	4.58965	8.9868	0.00271937	0.0615291	4.58965	0.309561	0.57795	-0.11461	0.0299104	0.00412957	0.596915
3300002A11Rik	0.526148	4.19477	10.5085	0.00118828	0.262119	4.19477	2.6017	0.106749	-0.171128	0.0909101	0.00178376	0.124209
3632451O06Rik	-0.948202	7.8923	582.993	8.37779e-129	-0.054369	7.8923	1.91989	0.165869	0.321694	-0.0113127	0	0.1872
4430402I18Rik	0.816592	3.91123	23.9548	9.86262e-07	0.0346906	3.91123	0.0462284	0.829761	-0.260732	0.023576	0	0.837876
4632415L05Rik	0.448828	5.48188	40.077	2.44152e-10	-0.0358336	5.48188	0.255176	0.613454	-0.149363	-0.00377852	0	0.631362
4632427E13Rik	0.00468921	5.94986	0.00654896	0.935501	-0.0919052	5.94986	2.53477	0.111363	0.00927861	-0.0224803	0.938272	0.129147
4632428N05Rik	-0.174672	6.24187	8.2562	0.00406129	0.109568	6.24187	3.24854	0.0714871	0.0678633	0.0457518	0.00602574	0.0848869
4833420G17Rik	-1.91643	7.45827	1211.77	1.68966e-265	0.177293	7.45827	10.5187	0.00118171	0.581011	0.0459119	0	0.0017808
4833422C13Rik	-0.231479	6.0432	8.96834	0.00274698	-0.0559798	6.0432	0.524768	0.468815	0.083179	-0.0119898	0.00416211	0.491729
4833423E24Rik	-0.163471	3.83251	0.995492	0.318404	0.0936392	3.83251	0.323354	0.569599	0.0490928	0.022607	0.341393	0.58862
4921518J05Rik	-0.27607	3.27674	2.09884	0.147411	-0.044557	3.27674	0.0546641	0.815137	0.0928559	-0.00801094	0.167179	0.823991
4921534H16Rik	-0.390274	5.27975	19.5248	9.93e-06	-0.0733771	5.27975	0.68975	0.40625	0.141947	-0.0167656	1.18326e-05	0.430253
4922501C03Rik	-0.213347	6.60208	12.8686	0.000334136	0.018819	6.60208	0.100111	0.751697	0.0777162	0.0122049	0.000535424	0.763798
4930404I05Rik	0.079876	4.6876	0.706088	0.400745	-0.0170836	4.6876	0.0322256	0.857533	-0.0206678	0.000273027	0.423074	0.864165
4930405A21Rik	-0.199029	5.41823	4.12873	0.0421611	0.203398	5.41823	4.31698	0.0377339	0.0704401	0.0779492	0.0524419	0.0464783
4930417H01Rik	0.0198627	4.31345	0.0285857	0.865739	0.0931812	4.31345	0.631126	0.426943	-7.57276e-05	0.0393926	0.872498	0.45067
4930422G04Rik	-0.147176	4.95534	2.78466	0.0951706	-0.0175667	4.95534	0.0397248	0.84202	0.0563314	-0.000601653	0.111782	0.849419
4930423O20Rik	0.30574	3.08983	4.5719	0.0325005	0.0593824	3.08983	0.174026	0.676558	-0.101495	0.0262247	0.041062	0.692084
4930429B21Rik	-0.595862	3.25718	15.2344	9.49555e-05	-0.0460059	3.25718	0.0917293	0.76199	0.209963	-0.00986578	0.000124242	0.77359
4930430F08Rik	0.279222	5.77362	12.3842	0.000432974	0.0151706	5.77362	0.0363819	0.848729	-0.092829	0.00868496	0.000698122	0.855575
4930432K21Rik	-0.507172	4.28006	11.006	0.000908155	0.0746308	4.28006	0.236393	0.626824	0.174813	0.0248961	0.00141103	0.644138
4930447A16Rik	0.188248	8.65368	24.9817	5.78779e-07	0.0136605	8.65368	0.131551	0.716829	-0.0601142	0.0104548	0	0.730753
4930447C04Rik	0.782336	3.96873	17.3278	3.14555e-05	0.164732	3.96873	0.769351	0.380418	-0.237825	0.0635005	5.02884e-05	0.404902
4930451G09Rik	0.944407	5.12683	126.843	2.01021e-29	0.0362519	5.12683	0.187114	0.665329	-0.309333	0.0187306	0	0.681307
4930469G21Rik	-0.053657	3.44703	0.105852	0.744917	-0.0391931	3.44703	0.0565159	0.81209	0.0198089	-0.00653091	0.756814	0.821145
4930500M09Rik	1.70475	3.86973	18.5516	1.65367e-05	0.215465	3.86973	0.318798	0.572331	-0.406075	0.0630089	2.36651e-05	0.591291
4930503L19Rik	-0.0679496	4.04048	0.295785	0.586537	0.146292	4.04048	1.36713	0.242305	0.0330209	0.0536291	0.604204	0.266236
4930506C21Rik	0.421299	7.63664	119.396	8.57814e-28	0.0348775	7.63664	0.818217	0.365702	-0.139838	0.0183194	0	0.390765
4930506M07Rik	-0.060495	6.51009	0.829272	0.362483	-0.0476003	6.51009	0.513194	0.473759	0.0255568	-0.00853287	0.385091	0.496418
4930512B01Rik	0.334705	5.00239	16.2225	5.63222e-05	0.0321037	5.00239	0.149237	0.699265	-0.10985	0.015773	8.57861e-05	0.713788
4930529M08Rik	-0.392184	4.13919	5.43526	0.0197341	0.0582576	4.13919	0.120753	0.728219	0.131331	0.0215768	0.0257388	0.741654
4930539E08Rik	-1.61473	4.78579	136.222	1.78388e-31	-0.170249	4.78579	1.51748	0.218001	0.500955	-0.0367963	0	0.241307
4930558J22Rik	-0.230854	5.20793	8.90552	0.0028431	0.0347248	5.20793	0.201795	0.653276	0.0832118	0.019794	0.00431297	0.669797
4930563E22Rik	-0.0475864	3.27568	0.064257	0.79989	-0.07607	3.27568	0.163591	0.685872	0.0202279	-0.0151306	0.809111	0.700737
4930579G18Rik	0.114866	3.55067	0.650457	0.419949	0.0486571	3.55067	0.116186	0.733208	-0.0424571	0.0213018	0.442222	0.746603
4930579O11Rik	0.13282	5.03813	1.65029	0.19892	0.00207211	5.03813	0.000421477	0.983621	-0.0348951	0.0108063	0.2205	0.984236
4930581F22Rik	0.0975132	5.4781	1.46298	0.226457	-0.111039	5.4781	1.8983	0.168269	-0.0267517	-0.034353	0.249321	0.189833
4930586N03Rik	-2.23092	4.0112	324.237	1.73026e-72	-0.172619	4.0112	1.78194	0.181911	0.652542	-0.0354937	0	0.203917
4931406P16Rik	0.0684635	8.18001	4.75629	0.0291914	0.0252241	8.18001	0.645606	0.421688	-0.0182476	0.0145928	0.0371661	0.445606
4931415C17Rik	-0.947409	3.46233	41.101	1.44563e-10	0.0296027	3.46233	0.0374351	0.846582	0.322286	0.0121871	0	0.85361
4931422A03Rik	-0.0965888	5.29171	1.60777	0.204806	-0.0521123	5.29171	0.468014	0.493902	0.0373206	-0.0109175	0.226585	0.515862
4932411E22Rik	-0.222877	5.26033	9.77222	0.00177168	-0.0945355	5.26033	1.75692	0.185009	0.0847173	-0.0267262	0.00271262	0.207138
4932438A13Rik	-0.14595	9.20984	23.7795	1.08028e-06	-0.046394	9.20984	2.40315	0.121091	0.0559055	-0.00994694	0	0.139441
4932438H23Rik	0.242878	3.61224	3.76569	0.0523144	0.0582724	3.61224	0.217107	0.641253	-0.0799081	0.0190663	0.0640497	0.65816
4932442E05Rik	-0.101481	4.14332	0.696041	0.404117	0.175941	4.14332	2.09316	0.14796	0.0429332	0.0713802	0.426396	0.168262
4932443I19Rik	0.136319	3.7155	0.58188	0.445576	0.364256	3.7155	4.16645	0.0412322	-0.0385844	0.128405	0.466961	0.0506552
4932702P03Rik	-0.31648	6.22238	23.5794	1.19865e-06	-0.100999	6.22238	2.40079	0.121274	0.114535	-0.028172	0	0.139636
4933406I18Rik	-1.41823	4.4266	115.28	6.83392e-27	-0.114181	4.4266	0.740556	0.389483	0.449765	-0.0184006	0	0.413649
4933407E24Rik	0.906228	3.25374	17.0104	3.71751e-05	-0.0855007	3.25374	0.147349	0.701082	-0.290967	-0.0198261	6.80373e-05	0.715456
4933413G19Rik	-0.579661	3.61662	13.4976	0.00023887	-0.217656	3.61662	1.90771	0.167218	0.202328	-0.066744	0.000372726	0.188638
4933415D12Rik	-0.227189	3.60627	2.07471	0.149759	0.217071	3.60627	1.89062	0.169132	0.0855525	0.07512	0.169522	0.190658
4933421O10Rik	-0.158405	4.02844	1.3595	0.243624	-0.0808816	4.02844	0.355057	0.551264	0.0557445	-0.0230639	0.266709	0.571188
4933426D04Rik	1.00518	4.77098	8.58949	0.00338108	-0.0878506	4.77098	0.0646638	0.799271	-0.274297	-0.000886148	0.00504955	0.809191
4933427D14Rik	0.21109	6.04913	9.68192	0.0018609	-0.0102914	6.04913	0.0229916	0.879479	-0.069774	0.00501911	0.00285461	0.885251
4933431E20Rik	-0.052932	5.61378	0.495923	0.481297	-0.0203486	5.61378	0.0732125	0.786716	0.0234037	0.000590515	0.502236	0.797166
4933439C10Rik	1.20691	3.4259	40.7243	1.75298e-10	0.154529	3.4259	0.647163	0.421129	-0.380716	0.0539362	0	0.445041
5031439G07Rik	0.184542	9.51187	69.5891	7.30408e-17	-0.0172432	9.51187	0.607622	0.435685	-0.0586979	0.00028492	0	0.459201
5330417C22Rik	-0.0993915	4.81199	1.01118	0.31462	-0.163159	4.81199	2.723	0.0989118	0.0354824	-0.0421744	0.337536	0.115498
5330438D12Rik	-0.695443	4.76975	40.9248	1.58202e-10	-0.110312	4.76975	1.02838	0.31054	0.232209	-0.0303979	0	0.335725
5430405H02Rik	-0.607168	5.10392	50.4975	1.19319e-12	0.0509416	5.10392	0.35343	0.552178	0.214109	0.0211343	0	0.571963
5430417L22Rik	0.199797	5.3508	7.04708	0.00793947	-0.0157255	5.3508	0.0434476	0.834885	-0.0664379	0.00461243	0.011025	0.842683
5730455P16Rik	0.0482933	5.62121	0.509267	0.475456	-0.0092517	5.62121	0.0186267	0.891442	-0.0114635	0.00587467	0.4964	0.896631
5830403M04Rik	-7.82938	4.9427	1258.93	9.4956e-276	0.0475049	4.9427	0.00535022	0.941691	0.99246	0.00246029	0	0.944411
5830417I10Rik	-2.56118	6.79632	657.192	6.09685e-145	0.0279032	6.79632	0.083088	0.773155	0.701783	0.00256103	0	0.784144
5830418K08Rik	-0.250228	3.17915	1.10055	0.294145	0.0605053	3.17915	0.0655503	0.797929	0.0819669	0.0194688	0.317483	0.807931
5830444B04Rik	-0.805099	3.6629	24.5591	7.20646e-07	-0.0478107	3.6629	0.085342	0.770185	0.264898	-0.0028975	0	0.781346
5930412G12Rik	-0.440123	4.45109	8.75074	0.00309476	-0.0248111	4.45109	0.0274052	0.868515	0.148807	-0.00423574	0.00467682	0.874598
6330403A02Rik	0.0889438	10.0497	21.8334	2.97384e-06	-0.0371818	10.0497	3.8157	0.0507744	-0.0257088	-0.00677062	0	0.0614377
6330403K07Rik	0.689759	11.0772	707.096	8.56133e-156	-0.0462241	11.0772	3.19833	0.0737135	-0.229731	-0.00906482	0	0.0874486
6330408A02Rik	0.135246	5.34518	3.64489	0.0562415	0.0075776	5.34518	0.0114941	0.914622	-0.0405232	0.00970591	0.0684041	0.918296
6330416G13Rik	0.0467821	5.28346	0.352133	0.552908	0.0895541	5.28346	1.29078	0.255905	-0.0110191	0.0380136	0.571966	0.280175
6330549D23Rik	-0.32067	3.12836	3.88812	0.0486289	0.0702304	3.12836	0.188379	0.66427	0.108787	0.0355277	0.059858	0.680308
6430550D23Rik	-0.0128036	5.00426	0.0183235	0.892324	0.0231789	5.00426	0.0597594	0.806877	0.0134907	0.015091	0.897743	0.816119
6820431F20Rik	0.275838	4.29065	3.03185	0.0816447	0.080517	4.29065	0.256077	0.612828	-0.0934486	0.0319781	0.0967401	0.630688
8430419L09Rik	0.485042	10.2257	476.896	1.01175e-105	-0.0252136	10.2257	1.29174	0.255728	-0.161183	-0.00256674	0	0.280018
8430427H17Rik	-0.351691	3.9315	6.82175	0.00900544	0.274411	3.9315	4.14823	0.0416781	0.12733	0.0966315	0.0123946	0.0511522
9030025P20Rik	-2.4422	4.48073	230.877	3.8372e-52	0.155962	4.48073	0.950254	0.329655	0.677865	0.031967	0	0.354909
9030617O03Rik	-0.150645	5.50799	3.1694	0.0750301	0.138924	5.50799	2.6967	0.100556	0.0565528	0.0559159	0.0894483	0.11732
9130401M01Rik	-0.168334	5.78643	6.56513	0.0103996	-0.0973899	5.78643	2.19689	0.138289	0.0623343	-0.0266932	0.0141813	0.157755
9230112E08Rik	-0.0329752	4.51763	0.124199	0.724525	0.015465	4.51763	0.0273672	0.868605	0.0151802	0.0121908	0.737021	0.874702
9330101J02Rik	0.874198	3.80962	27.8403	1.31753e-07	0.0462171	3.80962	0.0784311	0.779435	-0.276955	0.0168188	0	0.790084
9330133O14Rik	-0.815289	4.34794	52.6246	4.03807e-13	-0.133051	4.34794	1.39548	0.237482	0.273882	-0.0275182	0	0.261225
9330160F10Rik	-0.0704367	4.87454	0.518295	0.47157	0.13165	4.87454	1.81302	0.178146	0.0281173	0.0541458	0.492646	0.200074
9330162012Rik	0.261329	6.21181	19.6257	9.41913e-06	-0.00931128	6.21181	0.024942	0.874512	-0.0836387	0.00381158	1.18326e-05	0.880382
9330182L06Rik	0.150153	8.72551	23.9485	9.89462e-07	-0.0128738	8.72551	0.176059	0.674782	-0.0470433	0.00164698	0	0.690327
9430008C03Rik	-0.0715081	4.42218	0.340829	0.559351	0.0168682	4.42218	0.0189523	0.890503	0.0254272	0.0102047	0.578281	0.895767
9430015G10Rik	-0.616396	7.02371	130.611	3.0121e-30	-0.00923757	7.02371	0.029347	0.86398	0.21446	0.00298434	0	0.870194
9430016H08Rik	-0.50562	5.02989	41.0314	1.49803e-10	-0.0158551	5.02989	0.0402285	0.841035	0.177863	-0.00159773	0	0.84844
9430041J12Rik	-0.280508	7.6721	45.4074	1.60025e-11	-0.0345552	7.6721	0.689152	0.406453	0.101618	-0.00568091	0	0.430469
9630028H03Rik	0.202014	4.02466	3.95873	0.0466288	-0.170002	4.02466	2.80158	0.0941714	-0.0671552	-0.0441163	0.0575122	0.110448
9630033F20Rik	0.514341	7.04259	118.134	1.62091e-27	0.0550601	7.04259	1.35369	0.244634	-0.171054	0.0244555	0	0.268558
9830147E19Rik	0.457441	4.37221	20.4117	6.24477e-06	0.0162939	4.37221	0.0263749	0.870988	-0.151488	0.0146494	5.91628e-06	0.877039
9930013L23Rik	-0.510045	3.85513	8.47356	0.00360345	0.0381324	3.85513	0.0496641	0.823649	0.172488	0.0155255	0.00537199	0.832087
A030009H04Rik	0.14223	8.33508	25.7831	3.82023e-07	-0.0300354	8.33508	1.14964	0.283624	-0.0443468	-0.00418009	0	0.308354
A130066N16Rik	-0.116531	3.7565	0.446391	0.504054	0.126516	3.7565	0.525643	0.468444	0.0467981	0.0514006	0.524319	0.491356
A230004M16Rik	0.10766	6.71614	4.64229	0.0311933	-0.0580745	6.71614	1.35079	0.24514	-0.0321559	-0.0139153	0.0396421	0.269079
A230006K03Rik	-0.765867	6.1137	10.6047	0.001128	5.32965	6.1137	440.08	1.04021e-97	0.0443812	0.924315	0.00171276	0
A230056P14Rik	-0.126284	6.92637	6.99112	0.00819151	0.0467745	6.92637	0.95896	0.327449	0.0490495	0.021771	0.0113326	0.352773
A2m	-0.402229	6.1075	35.5091	2.53868e-09	-0.19732	6.1075	8.547	0.00346092	0.141031	-0.0627988	0	0.00503772
A330021E22Rik	-0.259581	6.13204	13.7774	0.000205801	-0.146336	6.13204	4.38002	0.0363626	0.0934423	-0.0457026	0.000301731	0.0449223
A330041J22Rik	-2.3047	3.39566	128.348	9.41701e-30	-0.177822	3.39566	0.71692	0.397156	0.648155	-0.0247637	0	0.421112
A330050F15Rik	-0.217778	4.47544	5.47655	0.0192733	-0.0695192	4.47544	0.557687	0.455194	0.0819716	-0.0153778	0.025159	0.478172
A430005L14Rik	0.0974912	4.56848	0.647678	0.420944	0.00482588	4.56848	0.00164144	0.967683	-0.031811	0.0107495	0.443207	0.96933
A430105I19Rik	0.168224	5.96346	6.71191	0.00957714	0.0215196	5.96346	0.109912	0.740245	-0.0525819	0.0129744	0.0131756	0.753258
A530054K11Rik	-0.956982	5.89407	112.038	3.50496e-26	0.0420311	5.89407	0.216431	0.641773	0.320795	0.0169694	0	0.658604
A530058N18Rik	-1.36206	5.07797	138.558	5.50155e-32	0.0928614	5.07797	0.64659	0.421335	0.434675	0.0322405	0	0.445218
A630007B06Rik	-0.190401	8.37478	48.8522	2.75999e-12	0.0116305	8.37478	0.182202	0.669488	0.0718492	0.0105237	0	0.68523
A730071L15Rik	-0.0297192	4.70568	0.111943	0.737943	-0.168937	4.70568	3.61469	0.0572714	0.0155061	-0.0506041	0.750037	0.0689247
A830010M20Rik	0.149729	7.92121	11.3855	0.000740207	-0.0122083	7.92121	0.0757222	0.78318	-0.0459758	0.00121135	0.00118326	0.793803
A830018L16Rik	0.218856	7.83266	31.1444	2.39528e-08	-0.0285756	7.83266	0.530968	0.4662	-0.0706633	-0.00440649	0	0.489126
A830073O21Rik	0.271247	4.80948	9.48653	0.00206986	-0.0737524	4.80948	0.701906	0.402144	-0.0835347	-0.0230261	0.00319775	0.426265
A830082K12Rik	-0.186972	6.1458	6.53503	0.010577	0.00219705	6.1458	0.000896652	0.976112	0.0679199	0.00775496	0.0143647	0.977314
A930012O16Rik	-0.0954915	3.45815	0.358963	0.549083	0.171765	3.45815	1.1543	0.282651	0.0450453	0.0637431	0.568099	0.307378
A930015D03Rik	3.30948	4.72063	597.271	6.56706e-132	0.0317466	4.72063	0.0513339	0.820758	-0.814277	0.00628562	0	0.829481
A930017M01Rik	-0.140899	6.18497	4.13401	0.0420297	-0.030588	6.18497	0.194756	0.658987	0.0534824	-0.003364	0.0523147	0.675196
A930024E05Rik	0.194846	3.6398	2.03883	0.153327	-0.00820892	3.6398	0.00334173	0.953902	-0.0541162	0.0102275	0.173119	0.955995
A930028C08Rik	0.0183821	6.23592	0.103568	0.747589	-0.0550522	6.23592	0.929066	0.335106	-0.000302936	-0.0121521	0.759367	0.36037
AA987161	-0.103565	4.36149	0.761729	0.382788	-0.104565	4.36149	0.775774	0.378437	0.0470672	-0.0322043	0.405342	0.402991
Aacs	-0.034597	5.54222	0.120502	0.728491	-0.0386088	5.54222	0.150182	0.698362	0.0151008	-0.00563076	0.740864	0.712874
Aaed1	-0.250673	4.18123	3.36538	0.0665801	0.0122728	4.18123	0.00788812	0.929229	0.0875689	0.0066993	0.0801804	0.932519
Aagab	0.189873	4.94399	4.64228	0.0311936	0.0782867	4.94399	0.787479	0.374864	-0.0592139	0.0340115	0.0396421	0.399612
Aak1	0.0883747	9.60277	8.56408	0.00342861	-0.0547705	9.60277	3.28951	0.0697236	-0.0254565	-0.0125843	0.00512646	0.0828369
Aamp	-0.514955	7.11399	137.38	9.9598e-32	-0.0110689	7.11399	0.0635031	0.801042	0.180926	0.00147837	0	0.810845
Aar2	-0.0375335	7.28812	0.556492	0.455677	0.0351189	7.28812	0.487203	0.485178	0.0184727	0.0186067	0.477086	0.507514
Aars2	0.00979484	5.13471	0.00918426	0.923652	0.0505678	5.13471	0.245133	0.620523	0.00202747	0.0240068	0.927026	0.638296
Aarsd1	-0.228656	6.28013	13.7707	0.000206532	0.0684158	6.28013	1.2332	0.266785	0.0839862	0.0309723	0.000301731	0.291235
Aasdh	0.150242	4.93405	1.86977	0.171502	0.0178421	4.93405	0.0265967	0.870452	-0.0413366	0.0161203	0.191936	0.876501
Aasdhppt	6.09752	4.49747	614.976	9.25578e-136	-0.625625	4.49747	4.46317	0.0346331	-0.971696	-0.0129717	0	0.0428842
Aass	-0.863664	5.2608	82.7206	9.45094e-20	-0.105898	5.2608	1.24218	0.265051	0.290552	-0.0224618	0	0.289525
Aatf	-0.177876	6.15403	4.78721	0.0286719	-0.045659	6.15403	0.315247	0.574478	0.0671117	-0.00938978	0.036536	0.593389
AB041806	0.325275	3.36342	4.81705	0.0281795	-0.00175929	3.36342	8.57591e-05	0.992611	-0.102761	-0.00132898	0.0360243	0.992966
Abca3	-0.330924	6.81471	37.4337	9.45735e-10	-0.0261263	6.81471	0.233373	0.629034	0.118838	-0.00199681	0	0.646227
Abca4	0.0333905	4.41286	0.0444279	0.833059	0.00551682	4.41286	0.00120448	0.972314	-0.00623095	0.00721323	0.841145	0.973678
Abca5	-0.0556263	8.45922	2.72643	0.0986998	-0.0307469	8.45922	0.833077	0.361384	0.0244984	-0.00483219	0.115714	0.386499
Abca6	-0.0881871	4.87317	0.928531	0.335245	0.0853237	4.87317	0.868453	0.351384	0.037879	0.0333729	0.358107	0.376409
Abcb10	0.0315543	5.47778	0.135753	0.71254	0.0679963	5.47778	0.630977	0.426997	-0.00379234	0.0295622	0.725079	0.450703
Abcb1a	-0.208672	7.38056	17.9268	2.29561e-05	0.0238831	7.38056	0.234877	0.627931	0.077063	0.0142648	3.25396e-05	0.645153
Abcb1b	-2.41049	4.53674	136.027	1.96835e-31	0.0713702	4.53674	0.126383	0.722212	0.659988	0.011607	0	0.735885
Abcb4	0.217978	5.34566	4.61216	0.0317461	-0.19538	5.34566	3.70752	0.0541678	-0.0695365	-0.0632959	0.0402219	0.0654785
Abcb6	0.0637829	5.56053	0.414368	0.519761	-0.00505538	5.56053	0.0025535	0.959698	-0.0177468	0.00624084	0.539781	0.961612
Abcb8	0.239188	6.944	21.0998	4.35983e-06	-0.00319935	6.944	0.00376738	0.951057	-0.0779151	0.00570024	2.95814e-06	0.95327
Abcc9	0.157528	6.63161	4.87022	0.027324	0.01918	6.63161	0.0722202	0.788131	-0.0489233	0.0129377	0.0349652	0.798474
Abcd2	-0.0255099	7.35478	0.332529	0.564174	-0.0390737	7.35478	0.780102	0.37711	0.0139821	-0.00648705	0.583038	0.401654
Abcd3	-0.0590934	9.09428	4.28736	0.0383968	0.00925878	9.09428	0.105254	0.745614	0.0255939	0.00925345	0.0479899	0.758021
Abcf1	0.0489002	5.87148	0.449625	0.502513	-0.0420952	5.87148	0.333227	0.563765	-0.01249	-0.00887827	0.522875	0.58305
Abcf2	-0.0814225	7.51225	3.40496	0.0650006	-0.0228226	7.51225	0.267538	0.604988	0.0322249	-0.00175988	0.0783464	0.623145
Abcg1	0.108134	8.24295	11.532	0.000684069	-0.0574159	8.24295	3.25128	0.0713679	-0.0318445	-0.0133961	0.00107972	0.0847478
Abcg4	-0.192047	6.10344	9.19829	0.00242241	-0.0437384	6.10344	0.476934	0.489814	0.0701719	-0.00812124	0.00370951	0.512049
Abhd10	1.24745	6.56134	453.349	1.34656e-100	-0.136628	6.56134	5.4264	0.0198345	-0.400875	-0.0335436	0	0.0255998
Abhd16a	0.017823	7.32371	0.0876285	0.767214	0.0770372	7.32371	1.63525	0.200978	-0.00180015	0.0319126	0.778151	0.223671
Abhd17b	-0.0994108	6.98194	4.99579	0.025409	-0.00891275	6.98194	0.0402135	0.841064	0.0385708	0.0029382	0.0325011	0.848472
Abhd17c	0.112478	4.13343	0.634976	0.425536	-0.144097	4.13343	1.03953	0.307931	-0.037844	-0.0409258	0.447611	0.333045
Abhd2	-0.091444	7.33081	4.30042	0.0381029	-0.0443334	7.33081	1.01078	0.314717	0.0375183	-0.00925707	0.0476409	0.339923
Abhd6	9.70245	5.98156	2573.18	0	0.747145	5.98156	5.30816	0.0212258	-0.998242	0.00175758	0	0.0273628
Abhd8	-0.982782	7.26138	6.37567	0.0115695	-0.091086	7.26138	0.0538719	0.816458	0.288388	-0.0105022	0.015687	0.825289
Abi2	-0.023913	7.45772	0.343623	0.557746	-0.00744328	7.45772	0.033259	0.855292	0.0134018	0.00602857	0.576746	0.862044
Abi3bp	0.219638	4.54738	2.01442	0.155811	0.112601	4.54738	0.530172	0.466535	-0.0568587	0.0375947	0.175649	0.489493
Abl2	-0.0602049	4.50263	0.295798	0.586529	-0.0615547	4.50263	0.307625	0.579141	0.0343248	-0.00921562	0.604201	0.598092
Ablim1	0.164765	9.47322	42.9475	5.62288e-11	-0.0475323	9.47322	3.57488	0.0586598	-0.0518916	-0.0103385	0	0.0703772
Ablim3	0.200126	7.49183	20.7915	5.12101e-06	0.0213979	7.49183	0.237678	0.625888	-0.0636979	0.0132821	2.95814e-06	0.643313
Abr	0.126901	9.62035	30.7505	2.93422e-08	-0.0313264	9.62035	1.87409	0.171008	-0.0386479	-0.00444525	0	0.192599
Abracl	-0.0763335	4.58304	0.457375	0.498853	0.113416	4.58304	1.00969	0.314977	0.0329458	0.0452022	0.519216	0.340172
Abt1	-0.0793656	5.27609	1.23862	0.265737	-0.0664638	5.27609	0.8691	0.351205	0.0316982	-0.0204706	0.289016	0.376249
Abtb1	0.0796752	5.1979	0.691677	0.405594	-0.0497367	5.1979	0.270065	0.603288	-0.0218335	-0.0145493	0.42783	0.621503
Abtb2	0.0822285	3.64735	0.372227	0.541793	0.129658	3.64735	0.926516	0.33577	-0.0213944	0.0550729	0.561032	0.361026
AC020971.1	0.317927	7.19382	40.1462	2.35653e-10	0.102956	7.19382	4.21141	0.040153	-0.104144	0.0419447	0	0.0494158
AC025622.1	0.234321	5.0915	6.79289	0.00915216	-0.0565519	5.0915	0.395665	0.529337	-0.0746387	-0.014112	0.0126017	0.550043
AC087901.1	0.0641411	5.67083	0.68833	0.406733	0.0230325	5.67083	0.0886773	0.765865	-0.0162617	0.0129673	0.429081	0.77716
AC098726.1	-0.0272356	5.52888	0.152934	0.695748	0.000308003	5.52888	2.03094e-05	0.996404	0.0137844	0.00637669	0.709197	0.996714
AC099934.1	-0.0229003	5.25988	0.106341	0.744349	-0.0451547	5.25988	0.413364	0.520267	0.0122122	-0.0114422	0.75627	0.541112
AC100730.1	-0.36186	5.42202	8.98478	0.00272238	0.183088	5.42202	2.3004	0.129341	0.125784	0.0683176	0.00413548	0.148206
AC100751.1	-0.225244	3.8424	2.38864	0.12222	-0.0988133	3.8424	0.460864	0.49722	0.0722342	-0.0303692	0.140677	0.519166
AC102484.1	0.756249	3.54343	29.3132	6.15737e-08	0.181999	3.54343	1.67672	0.19536	-0.249086	0.0666576	0	0.217773
AC107641.1	-0.558684	6.94984	4.68206	0.0304791	6.98782	6.94984	624.559	7.62505e-138	0.00841976	0.980491	0.038728	0
AC108401.1	-0.21484	3.57615	2.48517	0.114924	-0.00182594	3.57615	0.000229961	0.987901	0.0792836	0.00502406	0.132909	0.988348
AC108401.2	0.144738	4.40776	2.06987	0.150235	-0.00455346	4.40776	0.00206571	0.963749	-0.0398046	0.00537855	0.170019	0.965629
AC109197.1	0.19531	3.98008	2.38326	0.122642	-0.0479552	3.98008	0.145388	0.702982	-0.0596771	-0.0149466	0.141115	0.717435
AC120136.1	0.0994649	4.02723	0.78117	0.376784	-0.23452	4.02723	4.34638	0.0370877	-0.0300052	-0.0745302	0.399228	0.0457773
AC120176.1	0.0477619	6.3567	0.656402	0.417833	-0.0531412	6.3567	0.812603	0.367352	-0.0105264	-0.0116345	0.440092	0.392448
AC121121.1	0.836181	3.75725	43.1873	4.9742e-11	-0.000862711	3.75725	6.19615e-05	0.993719	-0.27771	0.00484019	0	0.994063
AC121292.1	10.2618	6.72676	3836.92	0	-0.037042	6.72676	0.00182453	0.965929	-0.999165	-3.6179e-05	0	0.967685
AC121499.1	-0.787151	3.84117	42.7074	6.3571e-11	0.0112738	3.84117	0.00768954	0.930123	0.264244	0.00935122	0	0.933297
AC121821.1	0.223432	4.42964	4.33339	0.0373717	0.151682	4.42964	1.99747	0.157562	-0.0710217	0.0591101	0.0468126	0.178553
AC122371.1	0.0822567	5.40705	1.19545	0.274233	0.0190329	5.40705	0.0639018	0.800432	-0.0239199	0.0104926	0.297382	0.810247
AC122487.1	0.87846	3.43482	44.8307	2.14825e-11	-0.104218	3.43482	0.618716	0.431525	-0.290671	-0.0290814	0	0.455087
AC124169.1	-0.0828462	3.73267	0.389828	0.53239	0.148674	3.73267	1.25548	0.262508	0.036292	0.0551793	0.55204	0.286937
AC124500.1	-0.51733	4.3394	19.6107	9.49347e-06	-0.11268	4.3394	0.930904	0.334628	0.173093	-0.0336054	1.18326e-05	0.359902
AC125374.1	0.381599	3.08132	4.17186	0.0411006	0.0174132	3.08132	0.00852239	0.926446	-0.125966	0.00987906	0.0511877	0.929744
AC125486.1	-0.385344	3.9811	14.8745	0.000114908	0.170307	3.9811	2.8973	0.088728	0.135455	0.0629674	0.00015974	0.104505
AC126026.1	-0.479951	3.40105	12.4698	0.000413594	-0.0666431	3.40105	0.240626	0.623754	0.160906	-0.0164891	0.000650791	0.64129
AC127355.1	0.314466	4.21489	8.91687	0.00282548	0.082801	4.21489	0.619207	0.431342	-0.0994829	0.0392566	0.00429522	0.454903
AC127595.1	-1.40002	4.01858	143.296	5.0644e-33	-0.00702222	4.01858	0.00483576	0.94456	0.455245	0.00455444	0	0.947067
AC129021.2	0.0578294	4.06119	0.263007	0.608062	-0.0685005	4.06119	0.368921	0.543593	-0.0176679	-0.0183815	0.625106	0.563763
AC129605.1	-0.112656	4.90739	1.60953	0.204557	0.000594398	4.90739	4.04394e-05	0.994926	0.0429754	0.00741902	0.226333	0.995223
AC130214.1	1.33284	3.76512	87.0779	1.04329e-20	0.09379	3.76512	0.420286	0.516795	-0.417686	0.035467	0	0.537811
AC130216.1	0.0451777	3.49278	0.114801	0.734743	0.195332	3.49278	2.13651	0.143829	-0.00335925	0.0752802	0.747008	0.163686
AC131744.1	0.0447062	6.78639	0.444766	0.504831	-0.122254	6.78639	3.32538	0.0682181	-0.009841	-0.0351902	0.525124	0.0812276
AC131756.1	-2.4688	3.60108	104.071	1.95204e-24	-0.0078241	3.60108	1.08468e-06	0.999169	0.662795	-0.00197468	0	0.999326
AC131759.1	-0.0961649	3.66898	0.469829	0.493066	-0.240608	3.66898	2.9201	0.0874827	0.0392209	-0.0793359	0.513702	0.103059
AC131980.1	0.947152	3.52053	28.9439	7.45068e-08	-0.188689	3.52053	1.16762	0.279892	-0.304447	-0.0512102	0	0.304473
AC132347.1	0.567355	4.97877	43.4685	4.30842e-11	0.0959136	4.97877	1.24154	0.265174	-0.188395	0.0377562	0	0.289649
AC133646.1	0.26563	4.21176	6.75057	0.00937177	-0.0322795	4.21176	0.0998575	0.752001	-0.0901153	-0.00595918	0.01293	0.764032
AC134826.1	0.0434244	4.08375	0.112762	0.737021	-0.202056	4.08375	2.45604	0.117074	0.00187687	-0.055235	0.749235	0.135217
AC136008.1	-0.465015	4.99958	17.4886	2.89033e-05	-0.0364174	4.99958	0.107473	0.74304	0.162605	-0.00446704	4.43721e-05	0.755767
AC136215.1	-0.292854	3.66496	3.61997	0.0570901	-0.0809457	3.66496	0.280137	0.596612	0.100602	-0.0304274	0.0693684	0.615214
AC137938.1	-0.0973937	3.517	0.436137	0.508993	-0.0730116	3.517	0.244206	0.621185	0.0387089	-0.0142394	0.529188	0.639
AC138214.1	0.0954161	4.76593	1.00065	0.317154	-0.0841541	4.76593	0.778551	0.377585	-0.0251004	-0.0230643	0.340175	0.402139
AC139063.1	0.755339	3.34781	19.1196	1.22778e-05	-0.00120422	3.34781	7.17996e-08	0.999786	-0.234209	0.0109417	1.47907e-05	0.999749
AC140312.1	0.180171	5.75729	7.53359	0.00605592	-0.103892	5.75729	2.50459	0.113515	-0.0569174	-0.0303773	0.0086644	0.131454
AC140333.2	-0.263079	3.39555	2.9485	0.0859575	-0.0474811	3.39555	0.0952037	0.757663	0.0967194	-0.0101987	0.101488	0.769398
AC140392.1	0.0710824	7.09233	2.19188	0.13874	0.0594978	7.09233	1.53549	0.215291	-0.0190627	0.0256633	0.158225	0.238411
AC140416.1	0.279458	5.45768	11.9535	0.000545455	-0.00028513	5.45768	1.43521e-05	0.996977	-0.0903185	0.00323187	0.000872652	0.997237
AC141882.1	0.398457	4.20571	12.0522	0.000517325	0.0862744	4.20571	0.565929	0.451881	-0.131519	0.0371573	0.000834196	0.475069
AC144852.1	0.0417657	4.33455	0.131129	0.717265	-0.115349	4.33455	1.00137	0.316978	-0.010609	-0.0360332	0.729744	0.342307
AC147987.1	-1.29423	6.13107	308.183	5.43401e-69	0.0855716	6.13107	1.34961	0.245346	0.422012	0.028595	0	0.269286
AC149055.1	0.249104	5.81991	13.3025	0.00026505	0.119217	5.81991	3.04589	0.0809416	-0.0806162	0.0476492	0.000420056	0.0955628
AC153506.1	-0.572095	6.05395	81.328	1.91198e-19	0.0277325	6.05395	0.189979	0.662934	0.203941	0.0159707	0	0.678974
AC153801.1	-0.0631954	4.38403	0.226904	0.633829	-0.0289745	4.38403	0.0478192	0.826902	0.0299164	-0.00662709	0.649809	0.835184
AC154200.1	-0.247835	3.9296	3.52657	0.0603926	0.0695767	3.9296	0.277091	0.598614	0.0830143	0.0290473	0.0730957	0.617184
AC154486.1	-0.504591	4.25407	18.2036	1.98506e-05	-0.176149	4.25407	2.21396	0.136767	0.176491	-0.0533821	2.95814e-05	0.156205
AC154625.1	-0.0904512	5.10879	0.780131	0.377101	-0.0311405	5.10879	0.0927161	0.760752	0.0359203	-0.00653986	0.399506	0.772347
AC154766.1	0.0522512	3.80545	0.159306	0.689796	-0.0730341	3.80545	0.310828	0.577173	-0.01374	-0.0190983	0.703532	0.596092
AC154910.1	0.0594699	5.14377	0.565328	0.452122	0.0436388	5.14377	0.30428	0.581211	-0.0122443	0.0175164	0.473386	0.600166
AC158662.1	-0.0459623	3.99014	0.09924	0.752744	-0.0384146	3.99014	0.0702289	0.791004	0.0137519	-0.0140216	0.764233	0.801071
AC158993.1	-0.199826	5.84663	5.29295	0.0214119	0.0841604	5.84663	0.938388	0.332693	0.0733655	0.0340666	0.0277326	0.357935
AC158998.1	0.663882	4.91129	50.8768	9.83503e-13	-0.00849553	4.91129	0.00827097	0.927536	-0.221136	0.00389062	0	0.930883
AC159323.1	-0.0267332	5.86035	0.167908	0.681978	0.0609785	5.86035	0.873454	0.350001	0.0149754	0.0274992	0.696181	0.375001
AC159891.1	-0.320842	3.71467	4.85231	0.0276092	-0.0354598	3.71467	0.0574893	0.810509	0.106297	-0.0129736	0.0353823	0.819571
AC161601.1	0.199029	6.60158	8.82867	0.00296535	-0.109719	6.60158	2.68365	0.101383	-0.0632822	-0.0315276	0.00449933	0.118145
AC161602.1	0.117713	6.63731	5.97981	0.0144705	0.0396005	6.63731	0.676939	0.410643	-0.0352223	0.0211314	0.0193433	0.434539
AC163296.1	0.427302	4.47779	18.7285	1.50715e-05	0.00140976	4.47779	0.000221977	0.988113	-0.142761	0.00523281	1.77489e-05	0.988576
AC163677.1	-0.168727	2.9824	1.12521	0.288799	-0.0256034	2.9824	0.0258022	0.872384	0.0647049	-0.00300633	0.312128	0.878305
AC163993.1	0.222092	6.17946	10.273	0.00134988	-0.00609071	6.17946	0.0077302	0.929939	-0.0715638	0.00388987	0.00204703	0.93311
AC164431.1	-0.343242	5.19861	17.6479	2.65812e-05	0.0267428	5.19861	0.107033	0.743547	0.123425	0.0159588	4.1414e-05	0.756258
AC164612.1	0.194522	5.08565	6.67181	0.00979494	0.00409594	5.08565	0.00292258	0.956887	-0.0658477	0.00686999	0.013427	0.958769
AC165433.1	-0.298335	8.97553	155.391	1.15022e-35	0.00348302	8.97553	0.0211718	0.884312	0.107508	0.00721622	0	0.88988
AC167018.1	-0.171297	4.38149	1.61758	0.20343	-0.170019	4.38149	1.59435	0.206706	0.0624168	-0.0533518	0.225186	0.229561
AC169129.1	0.862173	4.68667	84.1278	4.63797e-20	-0.11931	4.68667	1.60258	0.205537	-0.285515	-0.035499	0	0.228351
AC170752.1	-0.0904749	4.79407	0.834807	0.360886	-0.214992	4.79407	4.71264	0.0299416	0.0354233	-0.0681085	0.383488	0.0376956
AC170864.1	0.122103	3.93019	1.05603	0.304122	-0.0811231	3.93019	0.467658	0.494066	-0.0373182	-0.0325738	0.327292	0.516039
Acaa1a	1.51688	7.40426	1042.63	9.723e-229	-0.0551723	7.40426	1.38001	0.2401	-0.477834	-0.00966213	0	0.263928
Acaa1b	-1.53096	3.76914	60.0161	9.40825e-15	-0.0840766	3.76914	0.156411	0.692483	0.473048	-0.0129394	0	0.707262
Acaa2	-0.0808769	6.72935	1.31327	0.251803	-0.00343948	6.72935	0.00238322	0.961064	0.0336332	0.0045476	0.275054	0.963003
Acaca	-0.113566	8.21349	12.4034	0.000428543	-0.0597711	8.21349	3.43566	0.063803	0.0447831	-0.0144591	0.000683331	0.076326
Acacb	-0.16478	4.90245	1.8203	0.177278	-0.124557	4.90245	1.04134	0.307509	0.06754	-0.043807	0.197906	0.332673
Acad11	-0.0880333	6.34068	1.94707	0.162903	-0.00331468	6.34068	0.00275549	0.958136	0.0360051	0.00568725	0.183003	0.96005
Acad8	0.299319	4.68756	6.21479	0.0126688	0.130368	4.68756	1.17952	0.277453	-0.0964485	0.0486949	0.0171306	0.302148
Acadl	0.360205	5.45531	17.7254	2.55195e-05	0.0379251	5.45531	0.196844	0.65728	-0.11828	0.0207919	3.84558e-05	0.673572
Acads	-0.00994725	4.53943	0.00901391	0.924361	-0.071835	4.53943	0.465514	0.495058	0.0134032	-0.0172583	0.927703	0.51703
Acadvl	0.363384	4.76307	14.1787	0.000166246	-0.203132	4.76307	4.4251	0.035414	-0.121742	-0.0591986	0.00023961	0.0437391
Acan	0.293515	3.88242	4.10588	0.0427343	-0.105104	3.88242	0.524188	0.469061	-0.0918027	-0.0329965	0.053072	0.491975
Acap2	0.117333	5.6242	2.08983	0.148283	-0.0159507	5.6242	0.0387208	0.844003	-0.0349975	-0.000295472	0.168049	0.851288
Acap3	0.118441	7.68577	8.56644	0.00342415	-0.0369542	7.68577	0.833835	0.361166	-0.0359622	-0.00575709	0.00512054	0.386268
Acat2	-0.0316533	4.18524	0.0396396	0.842187	0.0689805	4.18524	0.187046	0.665387	0.0149029	0.0290746	0.849859	0.681358
Acat3	-0.0252293	3.48101	0.0364866	0.848514	-0.0781109	3.48101	0.35124	0.553412	0.00932558	-0.0109627	0.855841	0.573247
Acer2	-0.0866946	5.24773	0.980006	0.322197	0.00161919	5.24773	0.000346299	0.985153	0.0354236	0.00702979	0.344928	0.98568
Acin1	-0.00119707	7.42322	0.000817809	0.977186	-0.0352465	7.42322	0.707663	0.400221	0.00569399	-0.00589562	0.978329	0.424328
Acly	-0.01332	8.63666	0.17386	0.676704	-0.0514042	8.63666	2.58951	0.107574	0.00963705	-0.0114434	0.691096	0.125094
Acn9	-0.0183228	4.30989	0.0190898	0.890109	-0.198237	4.30989	2.26639	0.132208	0.00927832	-0.060574	0.89553	0.151285
Acot1	0.779931	4.84736	78.9387	6.40689e-19	-0.0533958	4.84736	0.371034	0.542441	-0.257773	-0.010906	0	0.562701
Acot11	-0.20003	7.89313	36.617	1.43775e-09	-0.0339726	7.89313	1.05602	0.304125	0.0738356	-0.00534195	0	0.329274
Acot13	-0.833895	6.73457	256.347	1.07355e-57	-0.0437062	6.73457	0.70305	0.401761	0.28572	-0.00773112	0	0.425872
Acot2	0.260592	4.3493	4.64491	0.0311458	0.0592253	4.3493	0.239263	0.624739	-0.0810208	0.0279769	0.0395711	0.642186
Acox1	0.0999395	7.72306	6.80115	0.0091099	-0.0580429	7.72306	2.29407	0.129869	-0.0293962	-0.0136546	0.0125189	0.148815
Acp1	-0.515371	3.33238	9.07632	0.00258941	0.143726	3.33238	0.69469	0.404574	0.176482	0.0542114	0.00391954	0.428599
Acp2	-0.00448791	6.30898	0.00440533	0.947081	-0.0337098	6.30898	0.249152	0.617673	0.00602549	-0.0051915	0.949584	0.635521
Acpl2	-0.129722	6.07702	4.11108	0.042603	-0.112345	6.07702	3.08372	0.0790793	0.0492779	-0.0327844	0.05293	0.0934418
Acpt	3.51483	4.32021	394.072	1.07526e-87	0.213789	4.32021	1.41814	0.23371	-0.83368	0.0270574	0	0.257213
Acrbp	-0.083011	5.88747	1.91653	0.166239	0.128244	5.88747	4.57422	0.0324566	0.0340416	0.0509644	0.186508	0.0404378
Acsbg1	-0.168964	9.58316	61.8787	3.65279e-15	-0.0258915	9.58316	1.45311	0.22803	0.0637028	-0.00265974	0	0.251631
Acsf2	0.0609423	5.04879	0.286721	0.59233	0.058952	5.04879	0.267954	0.604707	-0.0185035	0.0274215	0.609777	0.622846
Acsl1	-0.0410071	6.76742	0.573366	0.448925	0.00508936	6.76742	0.00882008	0.925176	0.0195689	0.00688949	0.470179	0.928531
Acsl3	0.137546	8.53139	25.5236	4.37013e-07	-0.00212359	8.53139	0.0060802	0.937847	-0.0433066	0.00526305	0	0.94058
Acsl6	0.0433962	9.97434	4.60691	0.0318433	-0.0247162	9.97434	1.49444	0.221528	-0.00979692	-0.00247204	0.0403047	0.245014
Acss2	-0.202084	6.48701	12.1451	0.000492174	0.00477516	6.48701	0.00679556	0.934301	0.0757526	0.00916183	0.000804615	0.937326
Acss3	0.418932	3.6736	5.23203	0.0221746	-0.00859012	3.6736	0.00237748	0.961111	-0.12845	0.00342473	0.0287265	0.963038
Actl6a	-0.462919	5.57361	22.9683	1.64691e-06	-0.0698315	5.57361	0.523138	0.469506	0.161342	-0.018201	0	0.492433
Actl6b	0.800831	4.81089	54.4998	1.55464e-13	0.155964	4.81089	2.06966	0.150255	-0.261013	0.0569927	0	0.170637
Actn1	0.0533199	6.13991	0.604603	0.436827	-0.0300362	6.13991	0.19186	0.661373	-0.0128051	-0.00436221	0.458506	0.677453
Actr10	0.346298	7.38413	34.6314	3.98417e-09	-0.0125891	7.38413	0.0457795	0.830577	-0.112675	0.00232643	0	0.838645
Actr2	-0.234344	9.05104	37.7839	7.90329e-10	-0.0392814	9.05104	1.06254	0.302636	0.0857914	-0.0079803	0	0.327741
Actr3	-0.0401236	7.45353	0.869549	0.35108	0.00399794	7.45353	0.00862382	0.926011	0.0194118	0.00724967	0.373903	0.929351
Actr5	-0.412741	5.54105	25.4902	4.44633e-07	-0.113181	5.54105	1.91761	0.16612	0.145716	-0.0336989	0	0.187463
Acvr2b	-0.109098	4.54476	1.24928	0.263691	-0.00165542	4.54476	0.000295091	0.986294	0.0466016	0.00500433	0.286881	0.986795
Acvrl1	-0.106605	5.37002	1.39272	0.237946	-0.0810185	5.37002	0.80437	0.36979	0.0412962	-0.0216495	0.26092	0.394675
Acyp2	0.0264172	6.99455	0.196157	0.657841	-0.0796651	6.99455	1.78429	0.181623	-0.00311299	-0.0207708	0.673048	0.203591
Adal	0.746378	7.49673	222.503	2.57318e-50	-0.0751996	7.49673	2.26584	0.132255	-0.247249	-0.0187795	0	0.151318
Adam11	0.0463505	5.93948	0.482118	0.487465	-0.0780899	5.93948	1.36918	0.241952	-0.00860543	-0.0203949	0.5082	0.265893
Adam17	-8.27786	3.87843	801.331	2.77192e-176	-0.0933015	3.87843	7.83504e-10	0.999978	1	0	0	0.999808
Adam19	0.0368662	5.88033	0.198764	0.65572	-0.152305	5.88033	3.39063	0.065568	-0.00820371	-0.0457841	0.671022	0.0783789
Adam22	0.105443	11.0873	39.6946	2.96948e-10	0.000707091	11.0873	0.00178531	0.966297	-0.0312469	0.00650028	0	0.968008
Adam23	-0.00838547	8.70289	0.0592779	0.807641	0.280601	8.70289	66.3644	3.74811e-16	0.00824563	0.103179	0.816719	0
Adamts10	0.242466	4.20113	4.61632	0.0316692	-0.0628678	4.20113	0.310797	0.577191	-0.0792166	-0.013242	0.0401686	0.596122
Adamts15	-0.195272	4.70714	4.41066	0.0357149	0.0875292	4.70714	0.886205	0.346508	0.071551	0.0342456	0.0448839	0.371531
Adamts16	-0.303593	5.74121	16.0027	6.32508e-05	-0.107198	5.74121	1.99524	0.157794	0.10829	-0.0312085	9.76187e-05	0.178793
Adamts17	0.21239	4.00525	1.73192	0.188166	0.16411	4.00525	1.03793	0.308304	-0.0645939	0.0709499	0.209327	0.333474
Adamts2	0.0668082	5.05463	0.380839	0.537155	-0.0205195	5.05463	0.0357626	0.850007	-0.0175519	0.00089525	0.556459	0.85674
Adamts4	0.803471	5.75053	147.168	7.21086e-34	-0.048542	5.75053	0.53357	0.46511	-0.268528	-0.0103441	0	0.488008
Adamts6	0.194551	5.49321	2.49764	0.114017	-0.187497	5.49321	2.32115	0.127626	-0.0596481	-0.0575735	0.131907	0.14644
Adamts9	-0.0550201	5.75063	0.419416	0.517229	-0.0730707	5.75063	0.739093	0.389952	0.0246414	-0.0170015	0.537258	0.414122
Adamtsl2	1.58245	4.85542	132.289	1.29326e-30	0.00949325	4.85542	0.00465922	0.94558	-0.479091	0.0047124	0	0.948017
Adarb2	-0.0282672	9.11472	1.34669	0.245858	-0.0329577	9.11472	1.83059	0.176058	0.0154977	-0.00494122	0.269076	0.197867
Adat1	-0.495856	4.19575	14.4104	0.000146985	0.0284246	4.19575	0.0474199	0.827615	0.169054	0.0150478	0.000212986	0.835927
Adc	0.136622	6.8182	6.12254	0.0133469	-0.111102	6.8182	4.04936	0.0441882	-0.0414265	-0.0323636	0.0180447	0.0541044
Adck1	-0.0528317	5.78303	0.508639	0.475729	-0.114482	5.78303	2.38859	0.122224	0.0233504	-0.0335908	0.496684	0.140621
Adcy3	0.0594902	7.31828	1.85411	0.173307	0.0439711	7.31828	1.01297	0.314191	-0.0150778	0.0215691	0.193829	0.339429
Adcy5	-0.00112427	8.46868	0.00150461	0.969058	0.0128684	8.46868	0.197005	0.657149	0.00599615	0.0107503	0.970546	0.673427
Adcy7	-0.355628	6.03595	25.2643	4.99884e-07	0.0370443	6.03595	0.274441	0.600368	0.126156	0.018	0	0.618778
Adcy8	0.126443	3.99399	0.898496	0.343185	-0.0793704	3.99399	0.353749	0.551999	-0.0377803	-0.0194516	0.365961	0.571797
Adcy9	-0.190889	6.35972	6.20117	0.0127666	-0.0540926	6.35972	0.498067	0.480351	0.0719568	-0.0131587	0.0172637	0.502733
Add1	0.0988504	8.34551	11.508	0.000692967	0.0147176	8.34551	0.255112	0.613498	-0.0289635	0.0113478	0.00108564	0.631401
Add2	-0.0993664	6.95256	0.301875	0.582709	-0.226012	6.95256	1.55912	0.211794	0.0343615	-0.0638398	0.60079	0.234714
Adh5	4.55982	8.32468	3267.11	0	-0.115392	8.32468	2.29855	0.129495	-0.916553	-0.00539003	0	0.148377
Adipor2	0.0385367	6.67769	0.549256	0.458622	0.0194819	6.67769	0.14029	0.707993	-0.00890372	0.0123702	0.479929	0.722219
Adk	0.107671	7.35885	2.98852	0.083857	0.148352	7.35885	5.67256	0.0172323	-0.0322064	0.0567053	0.0992279	0.0225026
Adora1	-0.110646	5.82466	2.49327	0.114334	-0.00444813	5.82466	0.00404459	0.949291	0.0453739	0.00370505	0.132282	0.951655
Adrbk2	-0.115458	8.37494	11.2447	0.000798507	-0.0174698	8.37494	0.257435	0.611888	0.0448403	2.89415e-05	0.00126608	0.629874
Adss	0.0342007	7.09392	0.508744	0.475683	-0.0107157	7.09392	0.0499397	0.823168	-0.00648626	0.00212929	0.49666	0.831682
Aebp1	0.231994	3.94618	1.45538	0.227666	0.155385	3.94618	0.656184	0.41791	-0.0736319	0.0551897	0.250661	0.441822
Aebp2	-0.544083	7.71252	124.53	6.44947e-29	0.0170016	7.71252	0.121695	0.727203	0.189658	0.0114501	0	0.740639
Aen	0.151004	4.47762	2.51522	0.112752	0.198343	4.47762	4.34053	0.0372153	-0.0474147	0.0785808	0.130546	0.0459399
AF357341	-0.0921737	3.44035	6.5273e-10	0.99998	-7.79527	3.44035	640.365	2.78324e-141	0	-1	0.999828	0
AF357428	0.115035	3.341	5.92994e-10	0.999981	-7.67915	3.341	581.177	2.08013e-128	0	-1	0.999828	0
Afap1	-0.108202	4.76144	1.06766	0.301475	-0.185	4.76144	3.11848	0.077409	0.0439913	-0.0582529	0.32476	0.0916255
Afap1l1	-0.583245	5.66076	60.8867	6.04561e-15	-0.0738213	5.66076	0.974171	0.323642	0.203774	-0.0186032	0	0.34904
Aff3	-0.0383912	6.83699	0.479303	0.488738	-0.0455083	6.83699	0.673329	0.411894	0.0195635	-0.00943757	0.509428	0.435885
Aff4	-0.0921728	8.57921	8.15054	0.00430483	0.0174847	8.57921	0.293281	0.588126	0.0370911	0.0119996	0.00634522	0.606934
Aftph	-0.00496973	7.99808	0.0187752	0.891013	-0.0151741	7.99808	0.175011	0.675696	0.00726257	0.000993914	0.896361	0.691226
Agap1	0.222655	6.88681	13.9462	0.000188113	-0.0595613	6.88681	0.998064	0.317779	-0.0708832	-0.013176	0.000278065	0.343198
Agap2	-0.0852849	8.3639	7.18896	0.00733536	-0.0369528	8.3639	1.34956	0.245354	0.0354551	-0.00632417	0.0102381	0.269292
Agap3	0.0356499	7.82534	0.331274	0.56491	-0.00379055	7.82534	0.00374234	0.95122	-0.00692526	0.00500364	0.583718	0.95346
Agbl4	-1.25935	6.09286	216.517	5.2009e-49	-0.091726	6.09286	1.15834	0.281811	0.409542	-0.0222078	0	0.306546
Agfg1	-0.147419	8.13857	4.90406	0.0267936	0.0592934	8.13857	0.793426	0.373066	0.055281	0.025816	0.0342937	0.397846
Agfg2	0.180451	6.96847	13.713	0.000212976	0.0711353	6.96847	2.13091	0.144355	-0.0568908	0.0300031	0.000310605	0.164387
Agmo	-0.0644538	3.63418	0.140799	0.707488	-0.0214342	3.63418	0.0160623	0.899149	0.026344	-0.0102711	0.720228	0.903781
Agpat1	-0.018571	8.36759	0.280244	0.596541	-0.0023291	8.36759	0.00440671	0.947073	0.0116385	0.00547632	0.613951	0.949448
Agpat3	0.891828	3.99342	43.3573	4.56035e-11	-0.36706	3.99342	7.31336	0.00684437	-0.28982	-0.109125	0	0.00959326
Agpat4	0.241661	7.99062	42.6361	6.5932e-11	0.0247237	7.99062	0.446338	0.504079	-0.0782915	0.0147535	0	0.526017
Agphd1	-0.156216	4.04648	1.72452	0.189112	-0.32727	4.04648	7.57827	0.0059076	0.0609822	-0.106161	0.210342	0.0083745
Agps	0.158785	7.31099	8.94342	0.00278472	-0.0524585	7.31099	0.976215	0.323135	-0.0497509	-0.0119695	0.00422423	0.348576
Agrn	-0.0206156	7.24011	0.211202	0.645827	0.00616619	7.24011	0.0189095	0.890626	0.0122991	0.00913347	0.6616	0.895891
Agt	-0.144923	9.1248	28.7054	8.42687e-08	-0.017648	9.1248	0.425731	0.514091	0.0554645	-0.000100896	0	0.535368
Agtrap	0.909434	4.07081	49.9294	1.59375e-12	-0.0532662	4.07081	0.169385	0.680659	-0.301387	-0.0114914	0	0.695936
Agxt2l2	-0.109978	4.65293	1.03054	0.310032	-0.0586808	4.65293	0.293532	0.587966	0.0465069	-0.0159503	0.333164	0.606768
Ahcy	-7.41911	6.12242	30.3239	3.6559e-08	1.00256	6.12242	0.689301	0.406402	0.688408	0.0912212	0	0.430416
Ahcyl1	-0.0677182	8.37012	4.30791	0.0379355	-0.029788	8.37012	0.833603	0.361233	0.0292416	-0.00429866	0.0474634	0.386333
Ahdc1	-0.184258	7.03936	13.9969	0.000183115	-0.00657109	7.03936	0.0178255	0.893788	0.0687273	0.00520914	0.000272149	0.898693
Ahi1	0.126134	8.43739	8.52073	0.00351124	0.0303575	8.43739	0.493659	0.4823	-0.0379327	0.0167206	0.00523	0.504686
Ahnak2	-0.158864	4.77641	3.29617	0.0694418	-0.0579562	4.77641	0.438559	0.507819	0.0585985	-0.00981208	0.0835675	0.529644
Ahr	0.490652	3.77867	7.29892	0.00689963	0.0894936	3.77867	0.241952	0.6228	-0.153824	0.0346072	0.00972341	0.640441
AI413582	-0.170724	6.64568	8.22154	0.0041396	-0.0608317	6.64568	1.04398	0.306899	0.0640449	-0.0147613	0.00614406	0.332093
AI464131	-0.0622493	8.28095	3.16598	0.0751874	-0.0116172	8.28095	0.110273	0.739833	0.026876	0.00211843	0.0895607	0.752874
AI597479	0.0487549	5.79329	0.4901	0.483883	-0.100282	5.79329	2.07411	0.149818	-0.0122616	-0.0300735	0.504733	0.170158
AI836003	0.165019	4.90331	3.5065	0.0611286	-0.0161967	4.90331	0.0336329	0.85449	-0.0523865	0.00351384	0.0739565	0.861287
AI854703	0.196226	7.04231	16.7027	4.37178e-05	0.0166362	7.04231	0.120079	0.728949	-0.0634869	0.0120381	7.09954e-05	0.742343
Aimp1	0.388806	6.29637	34.7354	3.777e-09	0.0644033	6.29637	0.95326	0.328891	-0.127254	0.0284007	0	0.354184
AK157302	1.50423	5.73439	339.159	9.72675e-76	0.062035	5.73439	0.575225	0.44819	-0.482715	0.0192457	0	0.471575
Ak2	0.3623	6.6263	27.1093	1.92272e-07	-0.0944934	6.6263	1.84597	0.174253	-0.117897	-0.0269649	0	0.195947
Ak4	-0.0447711	6.03218	0.432027	0.510996	0.0661264	6.03218	0.94288	0.331538	0.0191194	0.0291363	0.531046	0.35666
Akap1	-0.0509408	6.27501	0.527197	0.467788	0.0863286	6.27501	1.51426	0.21849	0.0228041	0.0370841	0.488848	0.241822
Akap10	2.4645	6.00848	775.375	1.21906e-170	0.0329995	6.00848	0.138579	0.709697	-0.687496	0.0115413	0	0.723887
Akap11	-0.0916183	9.01468	13.1416	0.000288812	-0.00800914	9.01468	0.100462	0.751276	0.0363783	0.00278754	0.000458512	0.763428
Akap12	-0.334592	4.3664	8.88709	0.00287194	0.0601567	4.3664	0.285848	0.592894	0.112111	0.0251398	0.00436326	0.61154
Akap13	0.0274428	6.77582	0.345941	0.55642	0.0444264	6.77582	0.906473	0.341052	-0.00526631	0.021016	0.575489	0.366286
Akap2	-0.0158659	7.92585	0.196526	0.657539	-0.0214564	7.92585	0.359507	0.54878	0.0101463	-0.00142068	0.672758	0.56878
Akap5	0.0791178	5.08234	0.947269	0.330415	0.0874703	5.08234	1.1576	0.281964	-0.0228871	0.0363788	0.353297	0.3067
Akap6	0.0607417	9.62961	8.69991	0.00318225	-0.025944	9.62961	1.58717	0.207731	-0.0158767	-0.00280273	0.00480402	0.230596
Akap8	-0.3289	4.75396	9.75853	0.00178493	0.127414	4.75396	1.46515	0.226112	0.115115	0.0480118	0.00273628	0.249593
Akap8l	0.179876	4.9144	2.95358	0.0856878	-0.20699	4.9144	3.90755	0.0480698	-0.0580768	-0.0625622	0.101168	0.0584351
Akap9	0.177217	9.10717	45.5432	1.4931e-11	0.00929553	9.10717	0.125347	0.723306	-0.0561873	0.00961851	0	0.736989
Akirin1	0.189947	6.85921	12.8398	0.000339329	-0.0640618	6.85921	1.46047	0.226856	-0.0612536	-0.0159337	0.000538382	0.250413
Akirin2	0.184534	6.36772	6.53454	0.01058	-0.0548369	6.36772	0.577012	0.447486	-0.0583976	-0.0122827	0.0143647	0.470845
Akr1a1	-0.0517134	7.71803	1.49686	0.221156	-0.00112014	7.71803	0.000700301	0.978888	0.0235556	0.00623215	0.243807	0.979888
Akr1c14	-2.0918	4.19236	114.518	1.00329e-26	-0.069775	4.19236	0.128089	0.720422	0.593182	-0.00952389	0	0.734229
Akr1e1	-0.574836	6.94348	92.8019	5.78004e-22	-0.122211	6.94348	4.20512	0.040302	0.198845	-0.0352503	0	0.0496021
Akt1	0.0637559	7.424	2.01289	0.155968	-0.0292494	7.424	0.423658	0.515118	-0.0173055	-0.00394899	0.175856	0.536347
Akt1s1	0.161035	5.98995	4.04779	0.0442291	0.0374982	5.98995	0.219683	0.639282	-0.0493295	0.019132	0.054844	0.656249
Akt2	-0.215426	4.80947	4.771	0.028943	-0.0938052	4.80947	0.903529	0.341837	0.0819087	-0.0242436	0.036888	0.367055
Akt3	0.197333	8.18624	33.3636	7.64397e-09	0.0477121	8.18624	1.95071	0.162511	-0.0626813	0.0227869	0	0.183712
Aktip	-0.138544	9.03638	23.2751	1.4041e-06	-0.0765713	9.03638	7.10997	0.00766564	0.0531576	-0.0202997	0	0.0106434
AL513014.1	-0.591787	3.41709	16.0303	6.2337e-05	-0.187194	3.41709	1.60083	0.205786	0.209271	-0.060857	9.76187e-05	0.228644
AL607123.1	0.0587525	6.04019	0.631586	0.426774	0.0481524	6.04019	0.424192	0.514853	-0.0136319	0.0198141	0.448783	0.536086
AL645646.1	0.549444	3.77992	16.2724	5.48584e-05	0.0713153	3.77992	0.269136	0.603912	-0.183592	0.0295466	8.2828e-05	0.622059
AL670236.1	-0.262832	3.93156	3.35619	0.0669529	-0.0323936	3.93156	0.0503259	0.822497	0.0991362	0.00222407	0.080636	0.83106
AL772190.1	-0.197782	4.13413	1.46948	0.225427	0.134449	4.13413	0.680065	0.409564	0.0683993	0.0492934	0.248206	0.433394
Alad	-1.38279	5.44465	169.357	1.02248e-38	-0.0219613	5.44465	0.0433384	0.835089	0.442844	-0.00269795	0	0.84292
Alcam	0.756334	6.3065	80.1356	3.49581e-19	-0.0637426	6.3065	0.571407	0.4497	-0.247086	-0.0133573	0	0.473072
Aldh1a1	-0.339126	9.09825	111.864	3.8271e-26	0.0204799	9.09825	0.408447	0.522759	0.122114	0.0134424	0	0.543499
Aldh1l2	0.351285	5.8149	27.745	1.38402e-07	-0.0211856	5.8149	0.100729	0.750956	-0.114653	-0.001239	0	0.763145
Aldh2	0.018699	6.03982	0.0806286	0.776447	0.0305917	6.03982	0.215879	0.642198	-0.00060239	0.0181294	0.786789	0.65903
Aldh4a1	0.143799	3.81198	0.8305	0.362128	-0.0193503	3.81198	0.0151294	0.902106	-0.0339786	-0.000649987	0.384777	0.906514
Aldh5a1	-0.151653	9.41392	34.585	4.08033e-09	-0.0241261	9.41392	0.875455	0.34945	0.0577018	-0.00220809	0	0.374442
Aldh9a1	-0.40535	3.80222	8.88201	0.00287994	-0.0193399	3.80222	0.0214954	0.883438	0.146425	0.00605064	0.00436622	0.888993
Aldoc	-0.583067	10.1688	754.979	3.31767e-166	0.000152001	10.1688	5.22681e-05	0.994232	0.204413	0.00596559	0	0.994619
Alg1	-0.796382	6.91405	181.892	1.87187e-41	-0.0552447	6.91405	0.877883	0.348782	0.272844	-0.011458	0	0.373696
Alg2	-0.0433665	9.28737	3.48879	0.0617858	-0.000889257	9.28737	0.00146739	0.969443	0.020419	0.00573822	0.0746842	0.97093
Alg6	-0.543273	4.46604	21.1774	4.18679e-06	-0.130023	4.46604	1.21348	0.270644	0.187394	-0.0359133	2.95814e-06	0.295379
Alg9	0.330067	6.75084	30.8496	2.78825e-08	-0.0893939	6.75084	2.26367	0.13244	-0.107718	-0.0239394	0	0.151516
Alk	0.0785447	4.14393	0.449867	0.502398	-0.0629806	4.14393	0.289781	0.590361	-0.0193317	-0.0178225	0.52276	0.609102
Alkbh5	-0.103048	3.6736	0.649883	0.420155	0.045805	3.6736	0.12798	0.720536	0.0416702	0.0222863	0.44244	0.73435
Alkbh6	-0.245588	7.0728	24.3453	8.05231e-07	-0.133133	7.0728	7.15468	0.00747686	0.0901791	-0.039528	0	0.0103446
Alms1	0.322925	3.61326	4.12797	0.0421799	0.0856778	3.61326	0.291656	0.589161	-0.0987001	0.0362663	0.0524686	0.607875
Alox5ap	-0.49536	3.82988	10.5128	0.0011855	-0.124371	3.82988	0.671099	0.412669	0.169751	-0.0404281	0.00178376	0.436666
Aloxe3	-0.425708	4.0347	8.14536	0.00431716	0.00405392	4.0347	0.000610621	0.980286	0.147728	-0.00190305	0.00636001	0.981204
Alpk1	1.40227	5.99449	235.466	3.83049e-53	-0.0126211	5.99449	0.0195186	0.88889	-0.442399	0.000407761	0	0.894235
Alpl	-0.642552	5.51546	36.1694	1.80892e-09	-0.0775459	5.51546	0.52775	0.467554	0.220642	-0.0179729	0	0.490495
Alyref	0.0378117	5.8473	0.231214	0.630625	-0.145383	5.8473	3.41588	0.0645719	-0.0091179	-0.0430843	0.6467	0.0772756
Ambra1	-0.264326	6.38716	21.2336	4.06573e-06	-0.00842346	6.38716	0.0215427	0.88331	0.0975087	0.00379265	2.95814e-06	0.88888
Amd1	-10.3723	5.8615	2521.26	0	0.0563374	5.8615	1.83361e-11	0.999997	1	0	0	0.999808
Amigo1	-0.249223	4.01484	3.80846	0.0509944	-0.0950486	4.01484	0.552849	0.457156	0.0832911	-0.0273722	0.0624996	0.480109
Amigo2	-0.13387	7.31456	10.24	0.00137425	-0.029759	7.31456	0.506017	0.476868	0.0513391	-0.00447973	0.00208253	0.499476
Ammecr1l	0.141665	4.46092	1.16329	0.280785	-0.162754	4.46092	1.53548	0.215292	-0.0425501	-0.0492356	0.303952	0.238411
Amotl2	0.138126	6.20785	4.19169	0.0406225	0.110249	6.20785	2.67096	0.102194	-0.042672	0.0455618	0.0506168	0.119139
Ampd3	0.0908686	6.96018	3.04834	0.0808196	-0.0254075	6.96018	0.238329	0.625416	-0.0262261	-0.00287442	0.0958172	0.642825
Amz2	0.0868792	4.13676	0.503111	0.478136	0.0652011	4.13676	0.28369	0.594293	-0.0251482	0.032212	0.499121	0.612862
Anapc11	0.0852985	7.03955	3.03855	0.0813086	-0.0378167	7.03955	0.597191	0.439652	-0.024806	-0.00653736	0.0963585	0.463195
Anapc13	3.56401	6.0161	900.231	8.74348e-198	-0.1004	6.0161	0.721196	0.395752	-0.839397	-0.00973861	0	0.419713
Anapc16	-0.0229355	5.37182	0.0881484	0.766544	-0.028206	5.37182	0.133066	0.715274	0.0147273	-0.00280371	0.777497	0.729256
Anapc4	-0.0748302	4.34854	0.371625	0.54212	-0.0400907	4.34854	0.107147	0.743416	0.0317831	-0.0121292	0.561387	0.756104
Anapc5	0.02105	8.59943	0.137181	0.711099	-0.054191	8.59943	0.908871	0.340414	-0.00198831	-0.0124403	0.723644	0.365588
Angel2	0.266506	7.21137	24.8048	6.34406e-07	-0.0561397	7.21137	1.10093	0.294063	-0.0871383	-0.0132021	0	0.319118
Angpt1	-0.173258	4.97341	3.26968	0.0705714	0.0336662	4.97341	0.123301	0.725481	0.0659884	0.0149277	0.0847449	0.739092
Angptl1	-0.285191	4.52674	3.76678	0.0522801	-0.239346	4.52674	2.6455	0.103843	0.1078	-0.0753961	0.0640024	0.120964
Angptl3	0.578996	3.71717	13.6618	0.000218858	-0.130222	3.71717	0.692043	0.40547	-0.192696	-0.0407392	0.000331312	0.429478
Angptl4	-0.376559	3.64284	4.11869	0.0424118	-0.153195	3.64284	0.68798	0.406852	0.128711	-0.0457951	0.0527171	0.430824
Angptl7	-0.033577	5.72451	0.0806678	0.776395	-0.00759853	5.72451	0.00415099	0.948629	0.0168017	0.00220172	0.786733	0.950995
Ank	-0.589112	8.8505	467.599	1.06746e-103	-0.030702	8.8505	1.27082	0.259613	0.206416	-0.00433954	0	0.283996
Ank2	0.0699991	12.3733	34.7544	3.74038e-09	-0.0216642	12.3733	3.32917	0.0680612	-0.0190133	-0.00129316	0	0.0810975
Ank3	0.0170057	10.021	0.626674	0.428578	0.00530823	10.021	0.0610621	0.804825	-0.000501909	0.00818945	0.450487	0.814291
Ankdd1b	0.25953	3.57983	2.93887	0.0864715	-0.0799043	3.57983	0.277936	0.598057	-0.0836233	-0.0226133	0.102071	0.616645
Ankfn1	-0.211536	3.62239	2.42255	0.1196	-0.143438	3.62239	1.11528	0.290936	0.0791195	-0.0424434	0.137855	0.315838
Ankhd1	0.0425968	4.53577	0.167947	0.681943	0.1249	4.53577	1.44699	0.229012	-0.00789115	0.0540865	0.696143	0.252711
Ankib1	0.0918191	8.12221	6.7868	0.00918343	-0.0220143	8.12221	0.39005	0.532273	-0.0275022	-0.00113674	0.0126431	0.553031
Ankmy2	0.149288	6.89885	9.17714	0.00245057	-0.106108	6.89885	4.63641	0.0313005	-0.0457559	-0.030673	0.0037598	0.0391924
Ankrd10	-0.189365	6.60479	12.2341	0.000469245	0.0238049	6.60479	0.193364	0.660132	0.0717691	0.0129859	0.00074841	0.676282
Ankrd11	-0.0787224	7.45523	4.86607	0.0273899	-0.0368606	7.45523	1.06685	0.301657	0.0324358	-0.00607195	0.0350599	0.326795
Ankrd12	-3.66017	3.89965	52.6975	3.89091e-13	0.170968	3.89965	0.133645	0.714682	0.700682	0.020042	0	0.728653
Ankrd13a	-0.184372	4.97848	3.47399	0.0623408	0.0211147	4.97848	0.0455253	0.831041	0.0693714	0.0118147	0.0753291	0.839172
Ankrd17	0.234841	9.15591	69.7049	6.88759e-17	-0.0126021	9.15591	0.200774	0.654097	-0.0760379	0.00174548	0	0.670519
Ankrd26	-0.200921	7.43628	17.2818	3.22255e-05	0.0332928	7.43628	0.474624	0.490868	0.0743631	0.0175757	5.02884e-05	0.513048
Ankrd34a	0.334292	3.98818	5.99043	0.0143837	-0.116491	3.98818	0.729733	0.39297	-0.111592	-0.0333237	0.0192545	0.416929
Ankrd35	0.231378	5.70191	5.97253	0.0145305	-0.0783711	5.70191	0.68593	0.407552	-0.0727007	-0.0212729	0.0194143	0.431501
Ankrd40	-3.21038	9.86178	9253.7	0	-0.020494	9.86178	0.39947	0.527363	0.806316	-0.000207751	0	0.548093
Ankrd42	0.0500885	6.26051	0.503999	0.477748	0.0699684	6.26051	0.983301	0.321385	-0.0125831	0.0301987	0.498663	0.346955
Ankrd44	0.118476	5.4449	1.53512	0.215346	-0.258718	5.4449	7.32436	0.00680261	-0.0358281	-0.0824844	0.237767	0.00954593
Ankrd45	0.0620583	7.41518	0.914173	0.33901	6.49666e-05	7.41518	8.95137e-07	0.999245	-0.0168887	0.00589634	0.361938	0.999408
Ankrd49	-0.16031	5.38743	3.58416	0.0583328	-0.112795	5.38743	1.77367	0.182929	0.0610346	-0.0311606	0.0707558	0.204967
Ankrd50	0.0265514	8.04952	0.720372	0.396022	-0.0251585	8.04952	0.646775	0.421268	-0.00464487	-0.0030433	0.418491	0.445171
Ankrd52	-0.0379844	7.51606	0.50946	0.475373	0.0492669	7.51606	0.856828	0.354628	0.0186924	0.0225012	0.496317	0.379601
Ankrd6	0.0541334	5.36737	0.564904	0.452291	-0.0197872	5.36737	0.0755333	0.783444	-0.0117857	-0.000893855	0.473619	0.794042
Anks1	0.201124	6.90483	8.61514	0.0033338	-0.0580651	6.90483	0.718345	0.396687	-0.0629991	-0.0137775	0.0049756	0.420606
Anks1b	-0.0146109	7.27718	0.128827	0.719651	0.0117257	7.27718	0.0829504	0.773338	0.010507	0.00953766	0.732099	0.784322
Anks3	0.321974	5.81356	15.7976	7.04912e-05	-0.0980305	5.81356	1.46556	0.226047	-0.105638	-0.028133	0.000100577	0.249522
Anks6	-0.0973179	4.51918	0.651072	0.41973	-0.0456679	4.51918	0.143553	0.704774	0.039606	-0.0118745	0.442009	0.719113
Ankzf1	-0.318396	3.64952	6.34327	0.0117828	0.0921829	3.64952	0.529727	0.466721	0.111256	0.0388622	0.0159651	0.489685
Ano1	0.0946616	5.42157	0.967589	0.325282	0.0324393	5.42157	0.113471	0.736227	-0.026865	0.0168359	0.348043	0.749383
Ano4	-0.0334757	6.09371	0.178709	0.672485	-0.0858795	6.09371	1.17599	0.278175	0.0161577	-0.0227324	0.687097	0.302825
Ano6	0.16325	6.42561	7.77089	0.0053095	-0.0141751	6.42561	0.0585525	0.808799	-0.0513632	0.00196675	0.00769117	0.817974
Anp32a	0.309854	5.13168	15.0162	0.000106594	-0.140633	5.13168	3.08672	0.0789339	-0.101478	-0.041624	0.000144949	0.0932614
Anp32e	-0.0789773	6.24476	1.57083	0.210087	-0.0091886	6.24476	0.0212193	0.884183	0.0358094	0.0071805	0.231915	0.889732
Antxr1	-0.0971442	4.65083	0.678688	0.410039	-0.112185	4.65083	0.904453	0.34159	0.0398073	-0.0317178	0.432332	0.366813
Anxa1	0.526602	4.97489	22.049	2.65782e-06	-0.0184434	4.97489	0.0274368	0.86844	-0.176884	-0.000472512	0	0.874548
Anxa4	0.105841	3.83639	0.566268	0.451746	0.0833715	3.83639	0.351911	0.553033	-0.0263941	0.0394557	0.473031	0.572906
Anxa5	-0.0197422	8.43634	0.341382	0.559032	-0.0272447	8.43634	0.650144	0.420061	0.012061	-0.00336566	0.57798	0.443922
Anxa6	-0.00547788	8.68005	0.0286429	0.865606	0.027764	8.68005	0.735731	0.391032	0.00720161	0.0155814	0.872377	0.415181
Anxa7	-0.0498092	5.81943	0.303652	0.581602	-0.150518	5.81943	2.77463	0.0957685	0.0199111	-0.0439275	0.59976	0.11217
Aox1	-0.475131	4.53882	17.9322	2.2891e-05	-0.234287	4.53882	4.35905	0.0368129	0.165066	-0.0765269	3.25396e-05	0.0454874
Ap1ar	0.541435	7.93693	157.215	4.59436e-36	-0.0128735	7.93693	0.0890137	0.765435	-0.179562	0.00120619	0	0.776844
Ap1b1	-0.750889	5.73263	89.5776	2.94838e-21	-0.121058	5.73263	2.32992	0.126908	0.256344	-0.0333021	0	0.145662
Ap1g2	0.0280036	4.0627	0.0684838	0.793557	-0.223028	4.0627	4.34058	0.0372143	-0.00172954	-0.0754249	0.803091	0.0459399
Ap1m1	7.31208	4.58063	1003.99	2.44006e-220	0.461379	4.58063	1.75788	0.184889	-0.990093	0.00379753	0	0.207043
Ap1s1	0.0676295	7.77524	3.82958	0.0503555	-0.0193601	7.77524	0.313821	0.575345	-0.0178193	-0.00053948	0.0617749	0.594252
Ap2a1	-0.110418	6.07473	2.75554	0.096918	0.0168985	6.07473	0.0644827	0.799546	0.0424847	0.0109362	0.113643	0.809436
Ap2b1	0.0992257	9.36219	17.3108	3.17381e-05	0.0209357	9.36219	0.770639	0.380019	-0.0290046	0.0134205	5.02884e-05	0.404499
Ap3b2	0.0175875	9.07181	0.376379	0.539547	-0.0313499	9.07181	1.19587	0.274148	-0.000905991	-0.00460121	0.558829	0.298855
Ap3m1	0.287042	6.38397	29.4984	5.59638e-08	-0.0897373	6.38397	2.88197	0.0895765	-0.0924808	-0.0257236	0	0.105487
Ap4b1	-0.43515	5.78914	21.2022	4.13286e-06	0.101167	5.78914	1.14838	0.283888	0.151357	0.0390333	2.95814e-06	0.308653
Ap4e1	-0.3037	6.26867	22.1112	2.5731e-06	-0.050805	6.26867	0.619005	0.431417	0.107969	-0.0116369	0	0.454962
Ap4s1	-0.0647862	6.99822	1.68676	0.194029	0.0116521	6.99822	0.0545566	0.815316	0.0281051	0.0110611	0.215379	0.82418
Ap5m1	-0.440771	6.1819	46.8389	7.70668e-12	0.0407242	6.1819	0.399651	0.527269	0.155096	0.0196356	0	0.548002
Apba1	0.0666439	8.35622	4.54143	0.033084	0.00899526	8.35622	0.0827449	0.773612	-0.0177059	0.00955993	0.0418222	0.784591
Apba2	-0.148019	7.87963	9.71803	0.00182469	-0.0139024	7.87963	0.0857362	0.769669	0.0560941	0.00119203	0.00280432	0.780846
Apbb2	-0.00826573	4.13925	0.00565565	0.940052	-0.184677	4.13925	2.7534	0.097048	0.0148871	-0.0566911	0.942668	0.113516
Apbb3	-0.0334937	6.37726	0.255707	0.613085	0.107847	6.37726	2.65032	0.103529	0.0172727	0.0452261	0.629936	0.120648
Apc	-1.15662	3.6785	56.4139	5.87133e-14	0.0715761	3.6785	0.22325	0.636575	0.383432	0.0207669	0	0.653664
Apcdd1	-0.352201	4.21994	10.8449	0.000990697	-0.0796232	4.21994	0.55168	0.457632	0.129575	-0.0156709	0.0015264	0.48063
Aph1b	-0.923129	7.26464	348.449	9.22176e-78	-0.0815035	7.26464	2.72316	0.0989023	0.31329	-0.0202161	0	0.115483
Aph1c	-0.235334	5.47677	8.4316	0.00368756	0.0423119	5.47677	0.272619	0.60158	0.0861966	0.021123	0.00549919	0.619967
Aplp1	0.0622817	10.9948	16.9136	3.91199e-05	-0.030921	10.9948	4.16901	0.0411699	-0.0163803	-0.0045243	6.80373e-05	0.0505606
Aplp2	0.0465114	9.93798	5.56186	0.018356	-0.00461436	9.93798	0.0547431	0.815006	-0.011004	0.00465072	0.0240704	0.82386
Apod	-0.0861286	9.31854	7.70588	0.00550413	-0.0342165	9.31854	1.21626	0.270096	0.0347067	-0.00536237	0.0079367	0.294832
Apold1	-0.196858	6.42193	11.6374	0.000646397	-0.0189068	6.42193	0.107398	0.743126	0.0746663	0.00281375	0.00102648	0.755817
App	0.0490654	10.282	5.3123	0.0211753	-0.0109865	10.282	0.266365	0.60578	-0.0118187	0.00231974	0.0274309	0.62392
Appl2	0.00611126	6.99962	0.00754162	0.930797	-0.013714	6.99962	0.0380438	0.845355	0.00307417	0.000614291	0.933835	0.852489
Aprt	-0.793694	6.31862	192.046	1.13718e-43	-0.0203181	6.31862	0.125436	0.723212	0.272778	-0.000385091	0	0.736888
Aqp4	0.242742	8.78914	75.7798	3.1713e-18	-0.0207207	8.78914	0.552189	0.457425	-0.0774293	-0.000713866	0	0.480408
Aqr	-0.777755	5.7165	124.909	5.32886e-29	-0.0155057	5.7165	0.0493068	0.824274	0.268564	0.000494585	0	0.832687
Arap1	-0.212677	3.8583	2.85431	0.0911294	-0.021216	3.8583	0.0283133	0.866374	0.0760549	-0.00127532	0.107422	0.872596
Arap2	-9.13854	5.4427	1918.23	0	-0.734435	5.4427	5.26385	0.0217728	0.997967	-0.00203252	0	0.0280254
Arcn1	2.88607	8.28055	3231.14	0	0.0996824	8.28055	4.00019	0.0454953	-0.757831	0.0176575	0	0.0556367
Arf1	-0.0561985	7.46811	2.05472	0.151736	-0.0197465	7.46811	0.253686	0.614491	0.0246359	-0.000513039	0.171631	0.632412
Arf3	0.0237302	4.0142	0.0371484	0.847163	-0.0411238	4.0142	0.111511	0.73843	0.00290652	-0.000235327	0.85453	0.751489
Arf5	-0.626845	6.6389	95.9928	1.15304e-22	-0.00175905	6.6389	0.000800041	0.977435	0.20921	0.00696982	0	0.978551
Arf6	-0.766968	6.11669	10.7008	0.00107091	0.0410952	6.11669	0.0304813	0.861403	0.237358	0.0123458	0.00162994	0.867818
Arfgap1	0.149008	7.93581	0.985218	0.320914	0.0512427	7.93581	0.116693	0.73265	-0.042807	0.0225456	0.343775	0.746038
Arfgap3	-0.0169248	6.0481	0.0352485	0.851076	0.0326008	6.0481	0.131091	0.717304	0.00953993	0.0166947	0.858411	0.731179
Arfgef1	0.0659542	7.92298	3.64294	0.0563075	-0.00358469	7.92298	0.0107568	0.917396	-0.0185953	0.0051772	0.0684721	0.921068
Arfip1	0.0488163	3.98104	0.122815	0.726001	-0.0515864	3.98104	0.13766	0.710619	-0.0138403	-0.018702	0.738497	0.724769
Arfip2	-0.0600818	6.56508	1.45044	0.228458	-0.0528764	6.56508	1.12338	0.289193	0.0255199	-0.0117403	0.251415	0.314066
Arhgap1	0.0365198	5.60488	0.151298	0.697298	0.0109625	5.60488	0.0136143	0.907114	-0.00589652	0.00850452	0.710732	0.911173
Arhgap12	0.0247335	8.01043	0.455885	0.499553	0.000988758	8.01043	0.00072876	0.978463	-0.00342253	0.00660099	0.519894	0.979453
Arhgap19	-0.018023	4.28118	0.0220218	0.882029	0.177202	4.28118	2.14351	0.143174	0.0104392	0.0687043	0.887872	0.163035
Arhgap26	0.0774554	7.27717	1.8955	0.168582	-0.0251183	7.27717	0.199327	0.655264	-0.0220996	-0.00269214	0.188928	0.67162
Arhgap27	-0.00180506	3.33724	0.000196983	0.988802	0.166023	3.33724	1.53801	0.214914	0.00562048	0.0705247	0.989262	0.238048
Arhgap29	-0.0506341	6.68009	0.635261	0.425432	0.0366792	6.68009	0.333383	0.563674	0.0200552	0.016918	0.447517	0.58294
Arhgap30	-0.0396751	3.24779	0.088809	0.765697	0.227985	3.24779	2.92966	0.0869656	0.0280619	0.0883845	0.776634	0.102482
Arhgap32	-0.0182534	9.11324	0.441484	0.506407	-0.0524517	9.11324	3.64516	0.0562323	0.0117922	-0.0120782	0.526606	0.0677917
Arhgap33	-0.0531795	6.00527	0.788723	0.374486	0.0547449	6.00527	0.835574	0.360666	0.025575	0.024301	0.396938	0.38578
Arhgap39	0.397451	4.57689	13.0702	0.000300026	0.0237843	4.57689	0.0467341	0.828847	-0.126637	0.011773	0.000482177	0.837071
Arhgap44	-0.0515784	8.61676	3.65804	0.0557993	0.01817	8.61676	0.453956	0.500462	0.0230836	0.0123714	0.0679071	0.522482
Arhgap5	0.0858257	7.09649	2.51665	0.11265	0.0539966	7.09649	0.995481	0.318407	-0.0313013	0.0235228	0.13041	0.343825
Arhgdia	0.0265464	6.69015	0.320907	0.571063	0.00266777	6.69015	0.00324471	0.954575	-0.00426631	0.0074621	0.589555	0.95664
Arhgdib	0.477288	4.37688	10.2285	0.00138287	-0.00430005	4.37688	0.00077904	0.977733	-0.152592	0.0037514	0.00209141	0.978787
Arhgdig	0.163568	4.2565	1.54814	0.21341	-0.170408	4.2565	1.6835	0.19446	-0.0463261	-0.0560983	0.235646	0.216894
Arhgef12	0.0924785	9.60867	13.1833	0.000282461	-0.0506967	9.60867	3.96211	0.0465352	-0.0267658	-0.0114504	0.000452596	0.0567934
Arhgef15	0.547368	7.44687	146.565	9.76782e-34	0.00539339	7.44687	0.0142228	0.90507	-0.182005	0.00726631	0	0.909256
Arhgef17	0.0779894	8.80714	3.57665	0.0585973	-0.0930908	8.80714	5.09553	0.0239875	-0.0216668	-0.0256952	0.0710487	0.0306464
Arhgef2	-0.185286	7.22868	15.5467	8.04914e-05	-0.0233253	7.22868	0.246344	0.619661	0.0708779	-0.00164305	0.000112409	0.637394
Arhgef26	-0.0286851	5.30669	0.0724001	0.787874	-0.0991892	5.30669	0.868747	0.351303	0.011998	-0.0266229	0.797604	0.376332
Arhgef28	-0.293942	6.26379	21.0583	4.45526e-06	-0.155824	6.26379	5.91594	0.0150045	0.106742	-0.0458238	2.95814e-06	0.0197693
Arhgef37	2.37866	5.6165	366.089	1.32943e-81	0.00828063	5.6165	0.00447098	0.946689	-0.663076	0.00257676	0	0.949079
Arhgef40	-0.606911	3.06802	10.5224	0.00117937	0.125602	3.06802	0.450047	0.502313	0.204481	0.0440939	0.00176897	0.524322
Arhgef7	-0.0635041	7.21438	2.58874	0.107626	0.0842089	7.21438	4.55214	0.0328775	0.0271067	0.0352309	0.125026	0.0408667
Arid1a	-0.0224488	5.66777	0.0708453	0.79011	0.0840411	5.66777	0.991972	0.319261	0.0141309	0.0342642	0.799763	0.344748
Arid4a	-0.098388	7.72483	4.75481	0.0292166	-0.108059	7.72483	5.73561	0.0166243	0.0385981	-0.0313468	0.0371957	0.0217423
Arid5b	-0.158082	6.14888	5.88847	0.0152404	0.0489895	6.14888	0.565542	0.452036	0.0578409	0.0224183	0.0203313	0.475246
Arl1	0.0162766	7.02362	0.0781194	0.779862	0.0294734	7.02362	0.255848	0.612987	-0.00117272	0.0150356	0.789925	0.630868
Arl15	0.160199	5.8087	4.94775	0.0261247	-0.0347078	5.8087	0.232056	0.630004	-0.0518774	-0.00438498	0.0335039	0.647271
Arl4c	-0.193731	7.46776	19.2544	1.14406e-05	-0.0309497	7.46776	0.491519	0.48325	0.0720341	-0.00507189	1.47907e-05	0.505597
Arl4d	-0.0378839	4.35832	0.105579	0.745234	-0.0402597	4.35832	0.119454	0.729627	0.0131001	-0.0088182	0.757122	0.742979
Arl5a	-1.02944	6.02581	31.6784	1.81932e-08	-0.211829	6.02581	1.33934	0.24715	0.333318	-0.0505415	0	0.271123
Arl6	-0.0181362	7.32296	0.121336	0.727589	0.0187708	7.32296	0.130069	0.718361	0.0112174	0.0129996	0.740018	0.732202
Armc1	0.207496	8.13252	39.4042	3.4456e-10	0.0199397	8.13252	0.36393	0.546332	-0.0670392	0.0122719	0	0.566535
Armc10	1.18809	7.70752	708.679	3.87537e-156	0.0580767	7.70752	1.70256	0.191954	-0.383917	0.0223725	0	0.214288
Armc7	-0.136817	4.46933	1.80898	0.17863	0.12139	4.46933	1.42419	0.232714	0.0519363	0.0498841	0.199305	0.256273
Armc8	-0.227317	5.31464	7.60698	0.00581429	0.000411979	5.31464	2.66773e-05	0.995879	0.081296	0.00702598	0.00835971	0.996143
Armc9	-0.0123565	6.31833	0.0356776	0.850183	-0.0186131	6.31833	0.0809461	0.776019	0.0089917	0.000967232	0.857497	0.786807
Arnt2	0.263334	8.6504	67.6723	1.93059e-16	-0.055824	8.6504	3.04227	0.0811224	-0.0860052	-0.0129251	0	0.095758
Arntl	0.0680938	7.10451	1.32819	0.249128	-0.00962643	7.10451	0.0265539	0.870555	-0.0186596	0.00292807	0.272451	0.876572
Arntl2	0.376326	5.61195	17.452	2.94654e-05	0.0713501	5.61195	0.627641	0.428222	-0.122902	0.0303267	4.43721e-05	0.451883
Arpc1b	8.58995	5.38208	1805.98	0	-0.219935	5.38208	0.471962	0.492086	-0.995523	-0.000239846	0	0.514101
Arpc2	0.110714	5.21237	1.67816	0.195169	-0.197219	5.21237	5.3239	0.0210349	-0.0340403	-0.0602848	0.216589	0.027138
Arpc4	0.072837	7.60533	3.50626	0.0611374	-0.0515453	7.60533	1.75585	0.185143	-0.0203203	-0.0112657	0.0739683	0.207301
Arpc5	0.10934	7.8628	9.25536	0.00234807	-0.0477321	7.8628	1.76376	0.184156	-0.033168	-0.0104173	0.00358231	0.206292
Arpp19	1.34906	7.51434	913.185	1.33539e-200	-0.0780088	7.51434	3.05577	0.0804508	-0.43159	-0.0173425	0	0.0950806
Arrb1	0.105014	9.05538	17.1064	3.53431e-05	0.005719	9.05538	0.0507326	0.821793	-0.030908	0.00818256	5.62047e-05	0.83041
Arrb2	0.15588	7.81816	18.2535	1.93369e-05	-0.0392667	7.81816	1.15828	0.281822	-0.0484599	-0.00702857	2.66233e-05	0.306564
Arrdc3	-0.0358301	5.44148	0.258485	0.611163	-0.0417329	5.44148	0.350327	0.553928	0.0202537	-0.00667048	0.628076	0.573776
Arrdc4	-0.497391	3.4434	10.076	0.00150213	0.0736225	3.4434	0.217771	0.640743	0.16723	0.0244895	0.00230439	0.657687
Arsb	0.6787	5.55773	58.3997	2.13925e-14	-0.192906	5.55773	4.72124	0.0297922	-0.223676	-0.056777	0	0.0375595
Arsg	-0.344702	6.33959	28.1295	1.13464e-07	-0.0350061	6.33959	0.290247	0.590062	0.122418	-0.00489673	0	0.608824
Arsj	-0.938495	4.32176	64.0063	1.24024e-15	-0.196265	4.32176	2.79283	0.0946869	0.313781	-0.0567285	0	0.110981
Arsk	0.47723	5.73532	30.0558	4.19782e-08	-0.112368	5.73532	1.66711	0.196646	-0.157359	-0.033157	0	0.219166
Asap1	0.102145	8.26464	6.14959	0.0131442	-0.0483653	8.26464	1.37883	0.240301	-0.0300267	-0.0106218	0.0177725	0.264153
Asap2	-0.0251582	4.85611	0.0473992	0.827652	-0.0609663	4.85611	0.280076	0.596651	0.0111174	-0.0163765	0.835666	0.615237
Asap3	0.166063	3.70338	0.941904	0.331789	-0.161247	3.70338	0.888152	0.345979	-0.048692	-0.0460147	0.354672	0.371022
Asb1	-0.0697929	7.67133	2.64448	0.10391	-0.0242243	7.67133	0.318579	0.572463	0.0293052	-0.00217277	0.121334	0.591448
Asb13	-0.261164	7.72101	51.5761	6.88747e-13	-0.00322066	7.72101	0.0078491	0.929404	0.0948054	0.00444243	0	0.932631
Asb16	-0.29492	4.23501	5.74788	0.0165086	-0.0614376	4.23501	0.251064	0.616327	0.110425	-0.0181968	0.0219169	0.634341
Asb3	-0.411606	5.26107	18.032	2.17224e-05	-0.0670085	5.26107	0.478771	0.48898	0.144695	-0.0165928	2.95814e-05	0.511229
Asb4	0.0977433	4.815	0.403798	0.525134	-2.99239	4.815	400.11	5.2121e-89	-0.0109335	-0.770404	0.544955	0
Ascc1	0.575331	5.59985	49.1974	2.31461e-12	-0.0402262	5.59985	0.241264	0.623295	-0.190626	-0.0102981	0	0.640899
Ascc2	0.280468	5.07781	7.99806	0.00468276	0.0255822	5.07781	0.0666055	0.796345	-0.0900862	0.0154974	0.00685402	0.806342
Ascc3	-0.00366029	6.0313	0.00229378	0.961801	0.0162233	6.0313	0.0449595	0.832079	0.00612189	0.0107846	0.963707	0.840068
Ash1l	0.0611346	7.83802	1.97351	0.160075	0.0462771	7.83802	1.13078	0.287609	-0.0162321	0.0223945	0.180104	0.312353
Asic1	0.122818	6.88893	4.78712	0.0286734	0.0229155	6.88893	0.166639	0.683117	-0.0377361	0.0139945	0.036536	0.698107
Asic2	0.141985	6.59975	6.81698	0.00902953	-0.0528279	6.59975	0.943754	0.331314	-0.0435524	-0.0124441	0.0124183	0.356435
Asic4	0.15642	4.53802	1.86756	0.171754	-0.152613	4.53802	1.77996	0.182154	-0.0415662	-0.0484148	0.192164	0.204121
Asns	0.000681658	7.73712	0.000183412	0.989195	-0.00226479	7.73712	0.00203005	0.964063	0.00496172	0.00480541	0.989638	0.965937
Asnsd1	0.07504	3.72242	0.30279	0.582138	0.0565091	3.72242	0.171548	0.678739	-0.0167868	0.0201111	0.60029	0.693974
Asph	0.0736586	8.50757	3.98588	0.0458832	0.0344043	8.50757	0.869586	0.35107	-0.02031	0.0178624	0.056675	0.376113
Asphd2	0.0085286	5.65189	0.0132503	0.908358	0.0156593	5.65189	0.0446716	0.832609	0.00197258	0.0111837	0.913034	0.840553
Asrgl1	0.332487	7.27588	51.186	8.4015e-13	0.048205	7.27588	1.0763	0.299528	-0.108793	0.022999	0	0.324715
Astn1	0.00216159	9.28503	0.00281867	0.957659	0.00131071	9.28503	0.00103752	0.974304	0.00472815	0.0067172	0.95982	0.97564
Astn2	-0.267774	5.25164	6.76664	0.00928777	-0.0925466	5.25164	0.809213	0.368353	0.0942064	-0.026468	0.0127969	0.393326
Asun	-0.178067	6.75169	9.66447	0.00187866	0.0379243	6.75169	0.438449	0.507872	0.0669429	0.0192764	0.00287531	0.529679
Asxl3	-0.351696	4.92935	9.18845	0.00243547	-0.0878842	4.92935	0.574696	0.448399	0.121859	-0.0261711	0.00374797	0.471785
Atad2	0.429816	5.12485	25.1307	5.35726e-07	0.079672	5.12485	0.862408	0.353066	-0.141191	0.0334019	0	0.378092
Atad2b	0.634004	5.54703	3.82916	0.050368	0.474586	5.54703	2.13916	0.143581	-0.161293	0.127938	0.0617926	0.163426
Atad3a	-7.91852	4.10217	122.807	1.53726e-28	-0.012831	4.10217	0.000667587	0.979387	0.963003	-0.00466954	0	0.980396
Atad5	-0.470497	5.17428	19.4006	1.05974e-05	-0.105153	5.17428	0.971466	0.324315	0.164426	-0.031126	1.47907e-05	0.349703
Atat1	-0.05421	5.06178	0.405141	0.524446	0.0481103	5.06178	0.319567	0.571868	0.0210628	0.0254416	0.544245	0.590827
Atcay	9.3938	5.81512	156.063	8.20007e-36	0.038273	5.81512	0.0023418	0.961404	-0.972906	-0.0236903	0	0.963331
Ate1	9.24932	5.25373	1939.52	0	0.498344	5.25373	2.78448	0.0951818	-0.998684	0.00131579	0	0.11151
Atf1	-0.203669	4.41153	3.51417	0.0608462	0.0933787	4.41153	0.737457	0.390477	0.0737892	0.0367275	0.0736075	0.414631
Atf2	-0.0670741	5.9687	1.31171	0.252085	-0.108045	5.9687	3.40389	0.0650429	0.027852	-0.0318897	0.275359	0.077808
Atf4	0.0735711	7.88828	3.68895	0.0547742	-0.0159902	7.88828	0.174282	0.676334	-0.0197647	0.000550747	0.0666529	0.691883
Atf5	0.453799	4.24209	8.71086	0.0031632	-0.0394865	4.24209	0.0647874	0.799083	-0.144265	-0.00577676	0.00478036	0.809025
Atf6	0.0328258	7.46881	0.467153	0.4943	6.54803e-05	7.46881	1.97965e-06	0.998877	-0.00605827	0.00639606	0.514868	0.999027
Atf6b	0.015995	6.54351	0.0477262	0.827068	0.00495837	6.54351	0.00459643	0.945947	-0.000899158	0.0082535	0.83514	0.94833
Atf7ip	-0.169453	8.35077	30.946	2.65311e-08	0.00294335	8.35077	0.00932928	0.923053	0.0639757	0.00728875	0	0.926499
Atg12	-0.0358213	5.4159	0.238268	0.62546	0.135807	5.4159	3.42666	0.0641517	0.0166953	0.0535509	0.641775	0.0767549
Atg13	0.0825918	3.39819	0.192742	0.660644	0.108243	3.39819	0.3296	0.565894	-0.0262102	0.041236	0.675693	0.585082
Atg16l1	-0.103002	5.87301	2.78786	0.094981	0.0476203	5.87301	0.595991	0.440112	0.0406086	0.0229258	0.111584	0.463606
Atg3	0.0499173	6.32875	0.470543	0.492737	-0.0225716	6.32875	0.0963014	0.756314	-0.0108804	-0.00183286	0.513368	0.768082
Atg4a-ps	-3.15693	4.02819	225.838	4.82096e-51	0.0810259	4.02819	0.160092	0.689072	0.782898	0.0129774	0	0.703908
Atg4b	-0.00446652	6.70377	0.00428928	0.947782	0.0190149	6.70377	0.0777634	0.780352	0.00658537	0.0124507	0.950274	0.790998
Atg4c	0.315657	6.69742	38.9464	4.35596e-10	-0.0216369	6.69742	0.18275	0.669021	-0.10441	-0.000302296	0	0.684757
Atg7	0.178985	5.55032	5.05237	0.0245922	-0.173494	5.55032	4.74625	0.0293623	-0.0566947	-0.0525421	0.0316225	0.0370981
Atg9a	-0.0185554	6.87887	0.12995	0.718484	0.00698715	6.87887	0.0184386	0.891988	0.0116043	0.00893329	0.730972	0.897125
Atg9b	-0.0686647	4.20692	0.305132	0.580683	-0.178617	4.20692	2.06039	0.151171	0.0355007	-0.0633543	0.598876	0.171555
Atic	-0.309038	7.24997	42.3698	7.55466e-11	-0.0205001	7.24997	0.186421	0.665913	0.110918	-0.00145146	0	0.681855
Atm	0.0707808	4.19982	0.262482	0.60842	-0.213554	4.19982	2.4071	0.120786	-0.0111118	-0.068901	0.625484	0.139181
Atmin	-0.0215485	8.13022	0.416918	0.518479	-0.0544644	8.13022	2.66322	0.102693	0.0131112	-0.0124767	0.538465	0.119752
Atp10a	-0.26775	5.61725	16.2406	5.57859e-05	0.0323924	5.61725	0.237565	0.62597	0.0984066	0.0155434	8.2828e-05	0.643375
Atp10b	-0.119049	3.70069	0.662493	0.415681	-0.00390957	3.70069	0.0007483	0.978177	0.0487215	0.0087087	0.437885	0.979228
Atp11a	-0.0674918	9.20206	7.35631	0.00668279	-0.00720482	9.20206	0.0838249	0.772179	0.028654	0.00379951	0.00948085	0.783207
Atp11b	-8.0961	4.39889	917.952	1.22852e-201	0.81885	4.39889	5.40158	0.0201185	0.997159	0.00284091	0	0.0259547
Atp13a3	-0.039937	7.5052	0.965154	0.325892	0.0280268	7.5052	0.475289	0.490564	0.0190256	0.0152479	0.348747	0.512782
Atp13a4	-0.097656	6.15331	2.0351	0.153704	-0.0316167	6.15331	0.213107	0.644343	0.0405579	-0.00375401	0.173563	0.661095
Atp13a5	0.0350353	4.77451	0.0776486	0.78051	-0.0504426	4.77451	0.161848	0.687461	-0.00186445	-0.00974255	0.790581	0.702266
Atp1a1	0.0167708	8.32326	0.235496	0.627478	-0.0266353	8.32326	0.594009	0.440873	-0.000431429	-0.00263089	0.643588	0.464425
Atp1a2	-0.328255	9.48764	254.949	2.16585e-57	-0.0247138	9.48764	1.44527	0.229288	0.118525	-0.00229222	0	0.252968
Atp1a3	0.0133651	10.7822	0.845324	0.357879	-0.00840771	10.7822	0.334534	0.563001	0.000534541	0.00319073	0.380686	0.582372
Atp1b1	-0.168197	7.33338	12.277	0.000458572	0.00894999	7.33338	0.0346548	0.852321	0.0850705	0.0123741	0.000733619	0.859059
Atp1b2	0.0244464	9.4551	1.1328	0.287179	-0.0309852	9.4551	1.81979	0.177338	-0.00353033	-0.0045014	0.310572	0.199237
Atp1b3	0.568997	9.17958	387.273	3.24797e-86	0.0158401	9.17958	0.300887	0.583327	-0.189575	0.0110952	0	0.602266
Atp2b1	-0.758621	7.52991	153.606	2.82364e-35	0.118153	7.52991	3.7494	0.0528266	0.256067	0.0417479	0	0.0640112
Atp2b2	0.0279827	9.54741	1.2665	0.260425	0.00490862	9.54741	0.0389676	0.843513	-0.00444845	0.00775659	0.2836	0.850768
Atp2b4	0.0594991	6.71139	1.06156	0.302859	-0.0167639	6.71139	0.0843366	0.771504	-0.0136409	-0.00125392	0.326091	0.78255
Atp2c1	-0.68707	4.22444	23.001	1.61916e-06	-0.0127027	4.22444	0.00756735	0.930679	0.23196	0.00165692	0	0.933888
Atp5b	0.0495215	12.2437	25.9691	3.46927e-07	-0.0114884	12.2437	1.39765	0.237118	-0.0118626	0.00222679	0	0.260849
Atp5e	0.654788	7.99918	203.405	3.77399e-46	-0.0615437	7.99918	1.80243	0.179419	-0.218168	-0.0140532	0	0.201352
Atp5g1	-0.377469	8.65785	135.844	2.15802e-31	-0.0600189	8.65785	3.43714	0.0637458	0.134982	-0.0138125	0	0.0762402
Atp5g3	-0.0664496	3.90339	0.216582	0.641657	0.13063	3.90339	0.840302	0.359311	0.0223778	0.0476626	0.657462	0.384351
Atp5j	2.14525	8.94203	1544.4	0	-0.0174897	8.94203	0.108782	0.741536	-0.625136	0.000822687	0	0.754397
Atp5s	0.0400709	5.3384	0.199638	0.655013	-0.220951	5.3384	6.07343	0.013723	-0.00993219	-0.0696354	0.670318	0.0182724
Atp5sl	0.338821	6.73259	34.1893	5.00033e-09	-0.0928483	6.73259	2.56877	0.108993	-0.111693	-0.0262483	0	0.126597
Atp6v0a1	-0.015258	8.03234	0.174538	0.67611	-0.0689984	8.03234	3.56875	0.0588767	0.0105705	-0.0176443	0.690578	0.0706552
Atp6v0a4	0.183774	6.19397	9.41922	0.00214723	0.00752789	6.19397	0.0157979	0.899978	-0.059501	0.00904833	0.00333087	0.904553
Atp6v0b	-0.112537	9.4142	25.3316	4.82747e-07	-0.03739	9.4142	2.79633	0.0944805	0.0441824	-0.00667217	0	0.110765
Atp6v0e	0.0215151	6.82352	0.192324	0.660989	-0.178963	6.82352	13.3117	0.000263756	-0.00252594	-0.0557185	0.676027	0.000393433
Atp6v1b2	-0.150331	10.1983	49.2306	2.27573e-12	-0.0296094	10.1983	1.91017	0.166944	0.0573065	-0.00382363	0	0.188318
Atp6v1g1	0.0305156	7.84243	0.553036	0.45708	-0.0516356	7.84243	1.58369	0.208229	-0.00451496	-0.0114255	0.478468	0.231105
Atp6v1g2	-0.621214	9.63142	698.742	5.61311e-154	-0.0184788	9.63142	0.619765	0.431135	0.216982	-5.80536e-05	0	0.454705
Atp6v1h	-0.049313	7.19766	0.897104	0.343559	-0.0613944	7.19766	1.3905	0.23832	0.0219198	-0.0146909	0.366313	0.262171
Atp8a1	0.0150644	9.49773	0.420317	0.516779	-0.0287262	9.49773	1.52841	0.216351	6.6613e-05	-0.003909	0.536796	0.23958
Atp8a2	-0.204467	4.1597	3.05142	0.0806665	-0.104968	4.1597	0.803432	0.370069	0.0746048	-0.0323791	0.095616	0.394927
Atp8b2	0.0820381	7.35032	3.13833	0.0764719	-0.128089	7.35032	7.65102	0.00567401	-0.0229002	-0.0387859	0.0909954	0.00812306
Atp8b5	0.285751	3.68043	1.43599	0.230789	0.293027	3.68043	1.51059	0.219049	-0.0862786	0.10066	0.253749	0.242408
Atp9b	0.0196691	5.60637	0.0514268	0.820599	-0.254745	5.60637	8.62072	0.0033236	-0.00153104	-0.0801549	0.828987	0.00484544
Atpaf1	-0.434909	7.1886	65.0886	7.16051e-16	0.0121837	7.1886	0.0510429	0.821258	0.153688	0.0101426	0	0.829957
Atpaf2	-0.406333	3.8849	9.99652	0.00156837	-0.132741	3.8849	1.06315	0.302498	0.14644	-0.0321295	0.00242272	0.327629
Atpif1	0.0661713	8.94989	5.60999	0.0178583	-0.0301818	8.94989	1.16711	0.279995	-0.0176466	-0.00420573	0.0234847	0.304594
Atr	-0.512943	6.03144	41.6668	1.0823e-10	0.0337877	6.03144	0.180829	0.670661	0.180488	0.0171834	0	0.686301
Atrnl1	-0.24845	10.1478	126.934	1.92083e-29	-0.031549	10.1478	2.04789	0.152417	0.0909873	-0.0045333	0	0.172856
Atxn2	-0.169252	4.84889	3.4619	0.0627981	-0.203165	4.84889	4.9866	0.0255443	0.0654352	-0.0648697	0.0758172	0.0325366
Atxn2l	-0.0142014	4.22827	0.010983	0.916535	0.046785	4.22827	0.114537	0.735037	0.0201393	0.0156067	0.920473	0.748363
Atxn3	0.264629	3.91484	4.45169	0.0348668	-0.188742	3.91484	2.26353	0.132452	-0.0862596	-0.0575307	0.0438959	0.151525
Atxn7	-0.0629683	3.69523	0.0992891	0.752684	0.469715	3.69523	5.46894	0.0193573	0.0224535	0.15494	0.764204	0.0250525
Atxn7l3	-0.0309203	8.3026	1.04002	0.307817	-0.0423714	8.3026	1.95303	0.16226	0.015904	-0.00913537	0.330987	0.183464
AU021092	0.189113	4.20327	1.34213	0.246659	-0.00242729	4.20327	0.000197594	0.988785	-0.062282	0.0097028	0.269854	0.989268
AU022252	0.0693562	5.24998	0.654276	0.418588	-0.0967114	5.24998	1.27163	0.259461	-0.0193203	-0.0259344	0.440849	0.283846
Auh	0.0501332	7.08842	0.711327	0.399004	-0.0294676	7.08842	0.24583	0.620027	-0.0118609	-0.00451139	0.421396	0.637761
Aurkaip1	-0.0376401	7.65658	0.966925	0.325448	-0.0153226	7.65658	0.160226	0.688948	0.0182625	0.00103289	0.348191	0.703783
Auts2	0.0563079	4.26957	0.311724	0.576624	-0.0974084	4.26957	0.933051	0.334071	-0.0183658	-0.0319967	0.595092	0.359331
AUTS2	0.0533666	4.11888	0.244571	0.620924	-0.174961	4.11888	2.63348	0.104632	-0.0152642	-0.0586621	0.637447	0.121807
AV039307	0.255808	5.56059	9.9012	0.00165171	-0.0106452	5.56059	0.0170929	0.895981	-0.0851624	0.00121464	0.00253513	0.900819
Aven	-0.191768	4.76416	1.75007	0.185868	0.165305	4.76416	1.29792	0.254593	0.074435	0.0626189	0.207064	0.278755
Avp	0.101474	8.20026	7.09346	0.00773656	0.0255801	8.20026	0.451061	0.501832	-0.0319483	0.0164935	0.0107144	0.523854
AW551984	-0.0671243	7.558	1.65235	0.19864	-0.00291361	7.558	0.00310536	0.95556	0.0272636	0.0061584	0.22018	0.957515
AW554918	-0.118021	4.94599	1.20383	0.272557	-0.0562301	4.94599	0.273351	0.601093	0.0456222	-0.0139588	0.295761	0.619476
Axin1	0.249354	5.3902	9.97589	0.00158603	-0.0407435	5.3902	0.26608	0.605974	-0.0794087	-0.00647738	0.00244343	0.624094
Axin2	-0.0376402	5.88709	0.268548	0.604308	-0.124515	5.88709	2.94104	0.086355	0.0174762	-0.0369553	0.621515	0.101804
AY036118	2.5311	8.84475	853.391	1.33123e-187	-0.261083	8.84475	9.91878	0.00163601	-0.692431	-0.0443742	0	0.00249667
Azin1	-0.0411813	5.46354	0.20819	0.64819	-0.0158523	5.46354	0.0305982	0.86114	0.0246442	0.00582776	0.663766	0.86754
B230118H07Rik	-0.00420371	7.66547	0.0077123	0.93002	-0.0297993	7.66547	0.387593	0.533568	0.00675406	-0.00414984	0.933084	0.554317
B230120H23Rik	0.112093	5.51332	1.97737	0.159667	-0.0395522	5.51332	0.246244	0.619732	-0.0318389	-0.00694986	0.179689	0.637459
B230206L02Rik	-1.01372	5.04095	56.6583	5.18503e-14	0.118712	5.04095	0.780303	0.377048	0.328679	0.0347204	0	0.401586
B230216G23Rik	-0.202117	3.47891	1.54084	0.214493	0.322373	3.47891	3.91816	0.0477673	0.0695964	0.112281	0.236805	0.0581275
B230216N24Rik	0.836179	5.26925	16.1041	5.99547e-05	-0.165933	5.26925	0.639033	0.424061	-0.253385	-0.0419611	9.76187e-05	0.447809
B230307C23Rik	-0.947768	3.54845	14.1996	0.000164408	0.205913	3.54845	0.716632	0.397251	0.296421	0.0714689	0.000236651	0.421201
B230314M03Rik	0.30024	4.85984	6.74989	0.00937537	-0.101541	4.85984	0.770853	0.379953	-0.100152	-0.0268511	0.0129389	0.404422
B2m	-0.264229	8.80613	84.0121	4.91759e-20	-0.0706535	8.80613	6.00771	0.0142435	0.096715	-0.0178099	0	0.0188256
B3galnt1	0.0596962	6.52286	1.36781	0.242188	0.014555	6.52286	0.0812935	0.775552	-0.0146288	0.0105752	0.265194	0.786357
B3galt2	-0.0431299	7.31842	1.01094	0.314677	-0.0478432	7.31842	1.24393	0.264714	0.0204269	-0.0100714	0.337619	0.289215
B3galt4	-0.0709362	3.65089	0.22671	0.633974	-0.203312	3.65089	1.85997	0.172628	0.0292668	-0.0635148	0.649933	0.194264
B3galt5	0.528392	8.23891	213.653	2.19185e-48	0.0264528	8.23891	0.536256	0.463989	-0.17623	0.0149898	0	0.486875
B3galt6	0.00949713	6.46424	0.0325175	0.856897	0.0961005	6.46424	3.32968	0.0680399	0.00238035	0.0383279	0.864109	0.0810827
B3galtl	-0.170921	7.20022	12.794	0.00034773	0.029154	7.20022	0.372252	0.541779	0.0639691	0.0166123	0.000547256	0.562038
B3gat2	0.07209	4.23815	0.43074	0.511626	0.0287123	4.23815	0.0684663	0.793583	-0.0224236	0.0169232	0.531661	0.803523
B3gnt1	0.0762817	7.55631	4.11709	0.042452	-0.0398653	7.55631	1.12439	0.288976	-0.0213351	-0.00793357	0.0527614	0.313856
B3gnt2	0.0423889	5.06653	0.317397	0.573176	-0.60826	5.06653	65.7145	5.21222e-16	-0.00905553	-0.201962	0.591735	0
B430202K04Rik	0.0124784	5.19037	0.0206573	0.885716	0.0467798	5.19037	0.291035	0.589558	0.00200993	0.0234155	0.891365	0.608262
B4galnt1	0.0377242	5.87287	0.330082	0.565611	0.0251652	5.87287	0.146753	0.701658	-0.00845733	0.0134709	0.584402	0.71606
B4galnt4	-0.109233	4.41216	1.18661	0.276015	-0.0679828	4.41216	0.45873	0.498218	0.0436641	-0.0135963	0.299299	0.520163
B4galt2	0.25663	5.68477	17.5569	2.78841e-05	-0.0989185	5.68477	2.60628	0.106441	-0.0836569	-0.0279672	4.1414e-05	0.123804
B4galt3	-0.168581	4.136	1.56229	0.21133	-0.243405	4.136	3.26246	0.0708828	0.0569028	-0.07565	0.233341	0.0841858
B4galt6	0.143091	8.37182	30.8365	2.80709e-08	0.006069	8.37182	0.0554963	0.813761	-0.0442891	0.008537	0	0.822689
B630005N14Rik	-1.30829	3.56964	71.9221	2.23867e-17	0.0350221	3.56964	0.0463093	0.829614	0.416766	0.00740143	0	0.837728
B930095G15Rik	-0.0905023	7.04901	3.52375	0.0604953	0.00515395	7.04901	0.011444	0.914808	0.0361903	0.00843839	0.0731992	0.918465
Baalc	-0.520141	4.9761	45.3692	1.63179e-11	0.0671823	4.9761	0.754477	0.385062	0.191283	0.0313878	0	0.409439
Bach2	-0.0860553	4.85623	0.852185	0.355935	-0.106991	4.85623	1.31759	0.251025	0.0327951	-0.0306556	0.378719	0.274986
Bag5	0.24586	6.86639	31.0731	2.48489e-08	-0.0606363	6.86639	1.88963	0.169243	-0.0797071	-0.0143749	0	0.190744
Bag6	-0.0451033	7.41864	0.936211	0.333254	0.0143641	7.41864	0.0949343	0.757996	0.0204693	0.0107854	0.356128	0.769709
Bahd1	0.147517	5.57385	4.0965	0.042972	-0.109137	5.57385	2.24313	0.134209	-0.0439691	-0.034318	0.0533945	0.15343
Bai1	-0.950734	4.18205	20.776	5.16269e-06	0.132401	4.18205	0.408692	0.522634	0.290458	0.0395849	2.95814e-06	0.543337
Bai2	0.100986	8.58104	10.3432	0.00129955	-0.0310182	8.58104	0.975823	0.323232	-0.029291	-0.00490699	0.00195533	0.348667
Bai3	-0.0347439	7.71535	0.771079	0.379883	-0.0640018	7.71535	2.6166	0.105751	0.0165512	-0.0162726	0.402278	0.123118
Baiap3	0.17337	9.78684	49.9125	1.60759e-12	-0.0121772	9.78684	0.246275	0.61971	-0.0543913	0.00197378	0	0.637453
Banp	0.110195	5.92185	2.07305	0.149921	0.0228919	5.92185	0.0893825	0.764964	-0.0319904	0.01264	0.169691	0.776421
Bard1	-0.0716313	3.67405	0.195569	0.658321	0.143916	3.67405	0.787604	0.374826	0.0271486	0.0571507	0.673525	0.399568
Baz2a	0.201575	7.37644	18.8253	1.43253e-05	-0.0198539	7.37644	0.182645	0.66911	-0.0641128	-0.000779523	1.77489e-05	0.68484
Bbox1	0.247734	4.81978	4.27527	0.0386708	0.0158814	4.81978	0.0173843	0.895103	-0.078688	0.0102547	0.0483005	0.899947
Bbs10	0.356186	5.16477	18.8626	1.40483e-05	-0.199915	5.16477	5.93938	0.0148063	-0.117467	-0.0622276	1.77489e-05	0.0195178
Bbs7	0.138054	6.44453	4.66657	0.0307553	0.0597294	6.44453	0.873545	0.349976	-0.0430968	0.0266425	0.0390416	0.374977
Bbx	0.300367	5.4652	12.2269	0.000471066	-0.0439627	5.4652	0.261992	0.608755	-0.0967777	-0.00723993	0.000751368	0.626827
BC003331	0.310585	8.82422	117.201	2.59382e-27	-0.061783	8.82422	4.6396	0.0312422	-0.101932	-0.015428	0	0.0391126
BC003965	0.0429887	6.38237	0.609364	0.435027	-0.0635149	6.38237	1.3303	0.248752	-0.00971088	-0.0166143	0.456758	0.272619
BC004004	0.246778	6.51126	18.8865	1.38728e-05	-0.0323333	6.51126	0.324113	0.569146	-0.0805399	-0.00374348	1.47907e-05	0.588215
BC005537	0.0679273	6.85864	2.22109	0.136137	0.0277467	6.85864	0.37075	0.542596	-0.0175457	0.0175696	0.155536	0.562822
BC016423	0.0307283	7.71154	0.603374	0.437294	-0.00691684	7.71154	0.030563	0.861219	-0.00561281	0.00413281	0.459027	0.867629
BC018507	0.249718	8.37452	65.6514	5.38161e-16	-0.0137666	8.37452	0.199574	0.655065	-0.0807038	0.00142806	0	0.671398
BC026585	0.901944	5.29155	111.955	3.65511e-26	-0.00718679	5.29155	0.00718708	0.932439	-0.297535	0.00324514	0	0.935566
BC029722	0.0946708	7.85252	7.73561	0.00541423	-0.0460157	7.85252	1.82746	0.176428	-0.0278431	-0.0091575	0.0078302	0.198261
BC030499	0.0733572	4.35269	0.314258	0.575079	0.149651	4.35269	1.30755	0.252838	-0.0211246	0.0574262	0.593536	0.276858
BC035947	0.547589	4.24049	24.4785	7.51429e-07	-0.121287	4.24049	1.19724	0.273875	-0.182661	-0.0369617	0	0.29858
BC046401	0.115012	5.43193	1.797	0.180076	0.00886455	5.43193	0.0107193	0.917539	-0.0383689	0.0101505	0.200893	0.921189
BC048403	0.390027	4.69345	15.1747	9.80061e-05	0.0497847	4.69345	0.247496	0.618844	-0.124264	0.0258972	0.000133116	0.636619
BC049715	-0.0443112	4.13754	0.163359	0.686083	-0.144416	4.13754	1.73905	0.18726	0.0157009	-0.0408535	0.700012	0.209502
BC053749	-0.260181	3.94523	2.89156	0.0890446	-0.21849	3.94523	2.03847	0.153364	0.085542	-0.0636168	0.10518	0.173809
BC056474	0.411624	4.05932	11.8557	0.000574855	-0.0206171	4.05932	0.0295277	0.863566	-0.138646	0.007999	0.000928857	0.869732
BC064078	0.964169	4.86859	71.3389	3.00848e-17	0.106292	4.86859	0.862342	0.353084	-0.311659	0.0403335	0	0.378116
BC067074	0.50043	3.94082	12.0849	0.000508316	0.0234395	3.94082	0.0264014	0.870924	-0.16916	0.0135916	0.000819405	0.876971
BC068281	-0.373942	4.11146	6.13207	0.0132752	0.0265403	4.11146	0.0304625	0.861445	0.132082	0.00936405	0.01795	0.86788
BC096441	-0.535106	4.56645	18.8638	1.40389e-05	0.135729	4.56645	1.21486	0.270371	0.187241	0.052552	1.77489e-05	0.295104
BC100451	0.00564603	6.40498	0.00547973	0.94099	-0.0358593	6.40498	0.220346	0.638777	0.00224604	-0.00630456	0.943559	0.65572
Bcar1	-0.0239183	6.67412	0.152357	0.696293	-0.0536381	6.67412	0.766485	0.381307	0.0126859	-0.0119267	0.709753	0.405742
Bcar3	0.249579	5.71118	10.2755	0.00134806	-0.058343	5.71118	0.561774	0.453547	-0.0805686	-0.0133	0.00204703	0.476743
Bcas3	-0.00518054	5.7772	0.00363816	0.951903	-0.171535	5.7772	4.00173	0.0454535	0.00590122	-0.0504871	0.954246	0.0555953
Bcat1	-0.11327	9.56569	24.1773	8.78635e-07	0.00200538	9.56569	0.00757664	0.930637	0.0446562	0.00685447	0	0.93385
Bcdin3d	0.015813	4.18005	0.0177735	0.893943	-0.0654636	4.18005	0.30738	0.579292	0.00557047	-0.0150348	0.899269	0.598246
Bckdhb	-0.354504	6.26642	21.9246	2.83572e-06	0.0208784	6.26642	0.0761858	0.782534	0.126229	0.0136441	0	0.793119
Bcl11a	-0.310327	3.40208	3.59902	0.0578137	0.145038	3.40208	0.78311	0.376192	0.112592	0.0523329	0.0701701	0.400802
Bcl11b	-0.230123	5.26059	10.1802	0.00141956	0.0134	5.26059	0.0343624	0.852938	0.0890437	0.0124703	0.00215649	0.859683
Bcl2	-0.00558692	3.50633	0.00232384	0.961552	0.0418968	3.50633	0.130744	0.717662	-0.000235302	0.0191265	0.963428	0.731534
Bcl2l13	-0.111703	6.47907	3.94371	0.0470468	-0.0315057	6.47907	0.31366	0.575443	0.0448898	-0.00445409	0.058018	0.594347
Bcl2l2	-0.0364164	6.60408	0.574261	0.448571	0.0121648	6.60408	0.0640834	0.800155	0.0178649	0.0102987	0.469862	0.809978
Bcl7a	0.912922	4.80627	85.2314	2.65411e-20	-0.115298	4.80627	1.3569	0.244075	-0.300876	-0.0272657	0	0.268037
Bcl7c	0.0677811	4.38694	0.442695	0.505825	0.035946	4.38694	0.124578	0.724121	-0.0187474	0.0205321	0.526112	0.737752
Bclaf1	-0.528269	6.59297	72.0235	2.12649e-17	0.0743716	6.59297	1.42832	0.232038	0.181426	0.0316782	0	0.255586
Bcr	1.93579	3.23155	137.146	1.12022e-31	0.0648944	3.23155	0.12038	0.728622	-0.586546	0.0175598	0	0.742065
Bcs1l	-0.0342286	4.46439	0.134796	0.71351	-0.0417508	4.46439	0.200941	0.653962	0.0143601	-0.0133813	0.725931	0.670398
Bdh1	-0.0252571	6.6532	0.149238	0.699265	-0.0287184	6.6532	0.193086	0.66036	0.013303	-0.0040912	0.712498	0.676477
Becn1	-0.045228	8.28524	1.35809	0.243868	-0.00502133	8.28524	0.0167372	0.897063	0.0208074	0.00455766	0.267005	0.901852
Begain	-0.0437702	6.75868	0.558787	0.454749	1.28851	6.75868	483.729	3.29827e-107	0.0171468	0.422386	0.476228	0
Bend4	-0.0863674	6.59071	2.90729	0.0881798	-0.129461	6.59071	6.53232	0.0105932	0.0343146	-0.037875	0.104156	0.0143499
Bend5	-0.428327	5.15853	6.48169	0.0108991	-0.0174991	5.15853	0.0105698	0.918114	0.143557	0.00571225	0.0148085	0.921728
Bend7	0.172632	4.78006	2.8072	0.0938421	0.0598314	4.78006	0.337829	0.561085	-0.0550316	0.0306653	0.110439	0.580609
Bet1	0.256471	3.9234	4.48717	0.0341501	0.145937	3.9234	1.45681	0.227438	-0.0780591	0.0557227	0.0430351	0.251004
Bhlhe40	0.00341053	4.42573	0.00108156	0.973765	-0.0607883	4.42573	0.338787	0.56053	0.00196451	-0.0144069	0.974992	0.580083
Bhlhe41	-0.14018	7.76811	14.925	0.000111871	0.00201047	7.76811	0.00306401	0.955857	0.0530026	0.00655506	0.000156782	0.95777
Bicc1	-0.112491	4.47113	0.727184	0.393798	-0.0861933	4.47113	0.429985	0.511996	0.0315052	-0.0280021	0.416356	0.533534
Bid	0.315554	5.72015	14.4064	0.000147304	-0.176014	5.72015	4.48415	0.0342105	-0.102316	-0.053831	0.000215944	0.042402
Bin1	-0.361811	6.09035	23.4874	1.25734e-06	0.0534497	6.09035	0.512528	0.474046	0.127426	0.0233392	0	0.496678
Birc6	-0.0569843	5.97526	0.660718	0.416307	0.00351839	5.97526	0.0025236	0.959935	0.0242717	0.00661843	0.43853	0.961881
Bivm	6.29716	3.57033	568.924	9.62504e-126	-0.757742	3.57033	4.25308	0.0391793	-0.980985	-0.011496	0	0.0482503
Blcap	0.795456	6.40243	176.425	2.92405e-40	-0.507175	6.40243	71.6969	2.50931e-17	-0.25542	-0.156029	0	0
Blm	0.151895	3.69381	0.861214	0.353399	-0.238221	3.69381	2.12055	0.145334	-0.0457724	-0.0735628	0.376151	0.165425
Blmh	0.0727969	7.10038	1.96122	0.161383	-0.0497542	7.10038	0.916197	0.338476	-0.0197073	-0.0109312	0.181414	0.36376
Bloc1s1	0.294455	4.1025	5.80352	0.0159942	-0.10397	4.1025	0.722452	0.395341	-0.0983888	-0.0294517	0.021272	0.419358
Bloc1s5	-0.182484	5.92039	5.34544	0.0207765	-0.0632467	5.92039	0.642408	0.42284	0.0662663	-0.016107	0.0270197	0.446638
Bloc1s6	0.565941	7.42156	127.542	1.41408e-29	0.0105979	7.42156	0.0447975	0.832377	-0.188748	0.00973211	0	0.840317
Blvra	-0.140755	5.59623	3.03499	0.0814873	-0.0401752	5.59623	0.247282	0.618996	0.0557548	-0.00729229	0.0965745	0.636776
Blzf1	-0.273185	5.84618	13.5849	0.000228007	0.0348912	5.84618	0.221947	0.63756	0.101091	0.0204648	0.000354977	0.654637
Bmf	0.166111	3.96393	1.21034	0.271265	-0.306904	3.96393	4.13309	0.0420525	-0.0496112	-0.0936514	0.294468	0.0516137
Bmpr1b	0.195318	7.38542	17.3795	3.06106e-05	-0.0425596	7.38542	0.825314	0.363631	-0.0617613	-0.0082841	4.43721e-05	0.388744
Bmpr2	0.0932906	7.21159	2.84915	0.0914223	-0.0287948	7.21159	0.271555	0.602291	-0.0265089	-0.00381291	0.107774	0.620636
Bnip1	-0.110895	5.98247	2.70019	0.100336	-0.0134509	5.98247	0.0397739	0.841923	0.0432653	0.000549575	0.117548	0.84933
Bnip2	-0.0410652	4.79962	0.122992	0.725812	0.174364	4.79962	2.21879	0.13634	0.0188513	0.0678487	0.738308	0.155731
Bnip3	-0.249052	7.56806	24.2379	8.51391e-07	-0.0227409	7.56806	0.202122	0.653013	0.0925297	-0.00155661	0	0.669516
Boc	0.336027	3.57368	2.74714	0.0974286	-0.298107	3.57368	2.16816	0.140895	-0.10171	-0.090987	0.114205	0.160547
Bod1	0.100993	6.96879	4.80535	0.0283714	0.0491549	6.96879	1.1384	0.285991	-0.0291102	0.0230511	0.0361781	0.310729
Bok	-0.877963	5.55377	112.228	3.18572e-26	0.148022	5.55377	3.18837	0.0741639	0.298077	0.0557528	0	0.087984
Bola3	-0.00980501	4.59809	0.0070673	0.933003	-0.0520635	4.59809	0.195303	0.658539	0.0141441	-0.00815166	0.935876	0.6748
Bop1	0.260287	4.93869	6.25429	0.0123893	-0.0310048	4.93869	0.0886028	0.765961	-0.0829068	-0.00589218	0.0167608	0.777237
Bpnt1	0.690218	8.45756	496.253	6.2131e-110	-0.0761107	8.45756	6.03976	0.0139872	-0.229506	-0.0189684	0	0.0185268
Bptf	0.0422847	5.69269	0.108597	0.741747	0.0776654	5.69269	0.364407	0.546069	-0.0110651	0.0306059	0.753817	0.566259
Brap	0.487651	5.71249	59.5943	1.16572e-14	-0.0496608	5.71249	0.616024	0.432529	-0.164105	-0.011723	0	0.456113
Brd2	-0.0655357	8.07006	2.39245	0.121922	-0.0480651	8.07006	1.2869	0.25662	0.0279635	-0.0102177	0.140325	0.280864
Brd4	0.0873936	6.28095	1.21846	0.269663	0.101177	6.28095	1.63269	0.201332	-0.0251239	0.0400954	0.292903	0.224014
Brd8	-0.0816091	6.62193	1.99693	0.157618	-0.0503396	6.62193	0.759743	0.383409	0.033786	-0.0113007	0.177539	0.407833
Brd9	0.112487	7.60537	7.75661	0.00535163	-0.0156379	7.60537	0.149942	0.698591	-0.0337286	0.000911207	0.00774146	0.713119
Brdt	0.0209284	3.78987	0.0200906	0.887284	-0.367282	3.78987	5.79516	0.0160703	-0.00703443	-0.118108	0.892776	0.0210649
Bre	0.187921	5.08466	4.07512	0.0435192	-0.0776296	5.08466	0.695706	0.40423	-0.0590431	-0.0201589	0.0540482	0.428289
Brf1	0.410187	5.88103	22.9762	1.64016e-06	0.0339472	5.88103	0.157398	0.691563	-0.135286	0.0175186	0	0.706292
Brf2	0.106542	3.50911	0.356858	0.550257	0.355008	3.50911	4.06364	0.0438159	-0.0314247	0.131241	0.569277	0.0536666
Bri3bp	0.0663638	8.00645	3.78333	0.0517655	-0.0251343	8.00645	0.542681	0.461324	-0.0179078	-0.002691	0.0634048	0.484233
Bricd5	-0.0209622	3.84139	0.0336891	0.85437	0.00500958	3.84139	0.00191622	0.965084	0.0086048	0.00440916	0.861772	0.966816
Brox	-7.70825	4.08872	846.184	4.91e-186	-0.790316	4.08872	5.5072	0.0189383	0.994	-0.006	0	0.0245289
Brpf1	0.317997	3.51787	5.39831	0.0201562	-0.225464	3.51787	2.70714	0.0999003	-0.108533	-0.0760961	0.026289	0.116539
Brpf3	0.343956	5.27186	12.1042	0.000503083	0.00748258	5.27186	0.00584503	0.939059	-0.112623	0.0108944	0.000819405	0.941813
Bsdc1	-0.107848	8.07913	9.01593	0.00267636	0.0164944	8.07913	0.210911	0.646055	0.04208	0.0118441	0.00405561	0.662727
Bsn	0.523884	4.53736	25.7381	3.91033e-07	0.0801688	4.53736	0.601125	0.438149	-0.167101	0.0279698	0	0.461606
Btaf1	-8.36818	5.52361	1985.06	0	0.350137	5.52361	0.987991	0.320234	0.996165	0.00126232	0	0.345757
Btbd1	-8.66031	6.17349	277.316	2.88689e-62	0.0295467	6.17349	0.00416864	0.94852	0.990257	0.00530786	0	0.950892
Btbd10	0.166296	7.89133	14.9704	0.000109209	-0.0587069	7.89133	1.86605	0.171928	-0.0517705	-0.0141112	0.000147907	0.193548
Btbd11	-0.0551164	6.69072	1.10195	0.293839	-0.0852793	6.69072	2.63738	0.104375	0.0253626	-0.022709	0.317196	0.121518
Btbd19	-0.535178	4.57115	27.2299	1.80644e-07	0.000849946	4.57115	6.35505e-05	0.993639	0.188026	0.0068508	0	0.994007
Btbd3	0.180508	5.66171	5.3369	0.0208785	0.117794	5.66171	2.27118	0.1318	-0.0727152	0.0466488	0.0271084	0.150871
Btbd6	-0.0473205	5.52884	0.426377	0.513772	-0.013213	5.52884	0.0332269	0.855361	0.0204723	0.00253306	0.533871	0.862109
Btbd7	9.73506	6.56484	736.921	2.80113e-162	0.406926	6.56484	1.20739	0.271849	-0.997821	0.00119065	0	0.296506
Btbd9	0.231646	4.73495	5.82611	0.01579	0.16721	4.73495	3.03806	0.081333	-0.0754962	0.0686952	0.021062	0.096039
Btc	0.174199	3.24118	0.891046	0.345194	-0.388258	3.24118	4.41601	0.0356031	-0.050706	-0.120895	0.367934	0.0440231
Btg2	0.204588	3.73595	2.14782	0.142772	-0.103353	3.73595	0.543716	0.460897	-0.0676624	-0.0247874	0.162402	0.483795
BX537302.1	-0.314122	5.04577	15.6937	7.44721e-05	-0.0355027	5.04577	0.199861	0.654833	0.113307	-0.00549292	0.000106493	0.671205
Bzrap1	-0.105473	5.71606	2.3232	0.127457	-0.0740235	5.71606	1.14415	0.284776	0.04175	-0.0197819	0.146339	0.309499
Bzw1	0.229295	7.08603	32.5844	1.14128e-08	-0.0728249	7.08603	3.2849	0.0699201	-0.0739351	-0.0180842	0	0.0830913
Bzw2	0.219436	7.09611	22.5731	2.02299e-06	0.0108782	7.09611	0.0554666	0.81381	-0.0705965	0.00969086	0	0.822721
C030006K11Rik	-0.104053	4.96948	1.70786	0.191264	-0.132971	4.96948	2.78818	0.094962	0.0425294	-0.0383077	0.212486	0.111276
C030034I22Rik	1.297	4.25236	118.017	1.71888e-27	-0.0421502	4.25236	0.120842	0.728123	-0.414365	-0.00822497	0	0.741553
C030039L03Rik	-0.653814	4.11325	31.0876	2.46643e-08	0.0946243	4.11325	0.650001	0.420112	0.224307	0.0356742	0	0.443967
C130050O18Rik	-0.0461202	3.63589	0.0249583	0.874471	0.241862	3.63589	0.718826	0.396529	0.0153338	0.0808133	0.880618	0.420441
C130074G19Rik	-0.0272886	6.03528	0.188884	0.663847	-0.044963	6.03528	0.512847	0.473909	0.0138549	-0.00981041	0.678743	0.496554
C1galt1	-0.0620232	4.39102	0.27877	0.597508	-0.0314778	4.39102	0.071706	0.788869	0.0267507	-0.00412929	0.614876	0.799181
C1qbp	-0.177954	5.53811	3.26584	0.0707368	-0.03265	5.53811	0.110306	0.739796	0.0659233	-0.00909245	0.0849135	0.752827
C1qtnf5	0.435141	5.10936	27.1994	1.83511e-07	0.0344167	5.10936	0.169744	0.68034	-0.144028	0.0189895	0	0.695613
C2	1.11498	3.50132	51.6675	6.57404e-13	-0.0177523	3.50132	0.0117418	0.91371	-0.367924	0.00463881	0	0.917459
C230081A13Rik	-0.30552	4.06047	5.61175	0.0178405	-0.0127525	4.06047	0.00992751	0.920633	0.120557	0.00298608	0.023461	0.924153
C2cd2l	-0.0908677	6.6216	3.12337	0.077177	0.0088898	6.6216	0.02987	0.862786	0.0368188	0.00838576	0.0917823	0.869013
C2cd3	-0.51563	3.24324	2.90884	0.088095	0.060385	3.24324	0.0348423	0.851926	0.161467	0.0208185	0.104079	0.858672
C2cd5	-0.0585108	7.8495	1.6461	0.19949	0.00320171	7.8495	0.00492191	0.944069	0.0253778	0.00690079	0.221086	0.946608
C330018D20Rik	-0.184837	4.48984	2.69414	0.100718	0.014197	4.48984	0.0158514	0.899809	0.0631934	0.0134178	0.117959	0.904419
C4a	2.31127	4.45333	137.009	1.20069e-31	0.296108	4.45333	2.29054	0.130165	-0.632766	0.0662279	0	0.149167
C4b	0.359171	7.25518	71.6009	2.6343e-17	0.0724958	7.25518	2.91525	0.0877461	-0.118538	0.0319825	0	0.103387
C530005A16Rik	0.40421	5.52884	31.297	2.21426e-08	-0.0313593	5.52884	0.188555	0.664122	-0.135228	-0.00531446	0	0.680166
C530008M17Rik	-0.204761	7.47142	25.7753	3.83567e-07	0.0270924	7.47142	0.451131	0.501798	0.0755549	0.0156372	0	0.523837
C630020P19Rik	0.159389	5.7662	4.30507	0.0379989	0.0732904	5.7662	0.910234	0.340052	-0.0575156	0.033189	0.0475433	0.365295
C77080	-0.212014	5.45679	7.29837	0.00690173	0.0419151	5.45679	0.284939	0.593482	0.0776298	0.020855	0.00972341	0.612105
C920025E04Rik	1.10751	3.43107	29.5705	5.39186e-08	-0.0415884	3.43107	0.0467914	0.828744	-0.345399	-0.00985781	0	0.836977
CAAA01201205.1	1.2315	4.70929	170.262	6.4868e-39	0.197718	4.70929	4.32297	0.0376013	-0.397964	0.0627074	0	0.0463452
Caap1	0.22257	3.96649	2.4782	0.115434	-0.0230792	3.96649	0.0262871	0.871201	-0.0724744	0.000589496	0.133451	0.877243
Cab39	-0.0217556	8.15387	0.271211	0.602521	-0.05145	8.15387	1.51645	0.218158	0.0133163	-0.0114437	0.619787	0.241447
Cab39l	0.225226	6.88022	21.5219	3.49804e-06	-0.0179674	6.88022	0.136855	0.711428	-0.0725168	0.000583455	0	0.725541
Cables1	0.0745924	5.59938	0.804011	0.369897	-0.0484296	5.59938	0.339143	0.560324	-0.019478	-0.0117613	0.392294	0.579905
Cabp7	0.0860388	5.71351	1.34693	0.245815	-0.0348233	5.71351	0.220637	0.638555	-0.0224257	-0.00481854	0.269046	0.65553
Cacfd1	0.298053	7.61688	61.6262	4.15252e-15	-0.0376176	7.61688	0.981445	0.321842	-0.0976659	-0.00668007	0	0.347369
Cachd1	-0.161825	6.10438	4.89211	0.0269797	-0.0339336	6.10438	0.21507	0.642822	0.0613142	-0.00606467	0.0345245	0.659672
Cacna1a	-0.00083562	7.10248	0.000250164	0.987381	-0.0830368	7.10248	2.48594	0.114868	0.00496386	-0.0232782	0.987898	0.132886
Cacna1c	0.043909	8.45009	1.32045	0.25051	0.00660026	8.45009	0.029839	0.862856	-0.0099171	0.00891381	0.27385	0.869096
Cacna1g	-0.135615	9.30134	37.061	1.1449e-09	-0.0327374	9.30134	2.15962	0.141679	0.0520709	-0.00484635	0	0.161399
Cacna1h	-0.0334559	6.977	0.407062	0.523465	-0.151968	6.977	8.3972	0.00375799	0.0161426	-0.0462322	0.543322	0.00546369
Cacna1i	0.0776906	5.50547	1.02764	0.310714	-0.0770659	5.50547	1.01097	0.314672	-0.0221997	-0.0195975	0.333776	0.339879
Cacna2d4	0.401569	4.18061	7.95144	0.00480492	-0.0173619	4.18061	0.0146657	0.90361	-0.131516	-0.000171974	0.00701967	0.907872
Cacng2	-0.132825	5.38895	3.23812	0.0719432	-0.0756753	5.38895	1.05156	0.305147	0.0501605	-0.0205109	0.0862269	0.330377
Cacng3	0.0145536	4.55615	0.0231439	0.879083	0.1657	4.55615	3.00875	0.0828159	0.00344837	0.0656205	0.885053	0.0978169
Cacng4	0.165758	5.49611	3.33338	0.0678874	0.0267879	5.49611	0.0868506	0.76822	-0.0547929	0.0145349	0.0817394	0.779414
Cacng5	0.249111	4.78416	6.74726	0.0093892	0.111923	4.78416	1.36217	0.243162	-0.0791951	0.0447322	0.0129507	0.267073
Cacul1	3.3716	5.17372	1209.11	6.39729e-265	-0.0239527	5.17372	0.0485121	0.825673	-0.824667	0.000293234	0	0.834054
Cacybp	0.0357238	5.37585	0.307802	0.579032	-0.129516	5.37585	4.05486	0.0440444	-0.00868901	-0.0332236	0.59735	0.0539299
Cadm1	-0.310778	8.30858	67.796	1.81321e-16	0.0985954	8.30858	6.82823	0.00897279	0.110673	0.0395204	0	0.0123384
Cadm3	0.1427	6.92306	9.64853	0.00189503	0.0258665	6.92306	0.317169	0.573314	-0.043555	0.0158562	0.00291377	0.592359
Cadm4	0.146373	8.57865	26.5445	2.57543e-07	-0.0231664	8.57865	0.664874	0.414845	-0.0452249	-0.00180852	0	0.438814
Cadps2	-0.140805	7.2105	8.4103	0.00373101	0.00398187	7.2105	0.00672102	0.934661	0.0537031	0.0074566	0.00557018	0.937687
Cage1	0.692737	4.87803	47.209	6.38081e-12	0.0453825	4.87803	0.20329	0.652078	-0.224115	0.0211923	0	0.668579
Calb1	0.0359353	7.79489	0.6495	0.420291	0.000242173	7.79489	2.98578e-05	0.99564	-0.00683087	0.00687264	0.442556	0.995906
Calca	-0.613094	3.85503	14.0415	0.000178822	-0.160436	3.85503	0.959654	0.327274	0.191751	-0.0545365	0.000269191	0.352596
Calcr	-0.803159	5.92452	31.1991	2.32876e-08	-4.05071	5.92452	774.029	2.39196e-170	0.0624325	-0.860242	0	0
Cald1	-0.161334	4.78609	2.46685	0.116271	-0.208064	4.78609	4.10304	0.0428062	0.0582567	-0.0612298	0.134326	0.0525336
Calm1	0.168443	10.5801	148.894	3.02425e-34	-0.0248367	10.5801	3.23705	0.07199	-0.0532407	-0.00251621	0	0.0854252
Calr	-0.0318267	9.7166	1.96153	0.16135	0.00740033	9.7166	0.106064	0.74467	0.0158478	0.00890948	0.18139	0.757279
Camk1	-0.0838458	6.19038	1.88201	0.170105	0.00221579	6.19038	0.00131762	0.971044	0.034429	0.00770887	0.190427	0.972424
Camk1g	-0.2959	6.46128	16.6576	4.47705e-05	-0.0149423	6.46128	0.042584	0.83651	0.104967	0.00054471	7.09954e-05	0.84428
Camk2a	-0.21784	6.8363	21.8005	3.02523e-06	-0.0581067	6.8363	1.55084	0.213012	0.0799591	-0.0116242	0	0.236027
Camk2b	-0.0575831	8.74228	3.61208	0.0573614	-0.0236748	8.74228	0.610572	0.434573	0.0251452	-0.00173546	0.069679	0.458113
Camk2d	-0.0336948	9.79109	1.65483	0.198302	-0.0233041	9.79109	0.79157	0.373626	0.017059	-0.00183345	0.219823	0.398406
Camk2g	-0.523159	7.21137	141.288	1.39168e-32	-0.0306882	7.21137	0.48578	0.485816	0.184143	-0.00430173	0	0.508153
Camk2n1	-1.73652	7.84351	344.074	8.27394e-77	0.0586475	7.84351	0.409183	0.522384	0.530602	0.0184846	0	0.5431
Camk2n2	0.0608052	4.88547	0.566094	0.451815	0.00461643	4.88547	0.00332214	0.954037	-0.0191356	0.0128119	0.473093	0.956131
Camk4	0.678437	3.59651	16.8591	4.02589e-05	0.0264976	3.59651	0.0270728	0.869308	-0.216695	0.0134045	6.80373e-05	0.875371
Camkk1	-0.341841	7.49098	51.1072	8.74552e-13	-0.0228183	7.49098	0.227806	0.633155	0.123122	-0.00174156	0	0.650265
Camkk2	0.265212	4.09706	4.51839	0.0335324	-0.0632644	4.09706	0.255968	0.612904	-0.0972814	-0.00920746	0.0423488	0.630771
Camsap2	-0.112789	8.65028	2.9116	0.0879446	0.0247763	8.65028	0.140566	0.707719	0.0434762	0.0148604	0.103905	0.721982
Camta1	0.0304487	9.56031	1.63214	0.201407	-0.0462355	9.56031	3.76331	0.0523888	-0.00553545	-0.010117	0.22302	0.0634551
Camta2	-0.21441	8.22178	40.8816	1.61733e-10	-0.0507766	8.22178	2.29277	0.129977	0.0796184	-0.0108648	0	0.148931
Cant1	0.0646196	4.5778	0.312718	0.576017	-0.143797	4.5778	1.54277	0.214206	-0.0188614	-0.0357494	0.594453	0.237338
Canx	0.253195	9.24121	57.996	2.62646e-14	0.000114644	9.24121	1.19022e-05	0.997247	-0.0822076	0.00604471	0	0.997497
Capn2	0.124497	7.91686	7.80415	0.00521265	-0.0212097	7.91686	0.226507	0.634126	-0.0378281	-0.00115331	0.00756397	0.651247
Capn3	0.253151	4.48115	3.70293	0.0543169	0.0340942	4.48115	0.0669771	0.79579	-0.0824392	0.0173802	0.0661559	0.805762
Capns1	-0.921817	9.42752	909.86	7.05454e-200	0.0244133	9.42752	0.643756	0.422354	0.313271	0.0133953	0	0.446268
Caprin1	-0.0808851	5.44851	1.21136	0.271062	0.00659275	5.44851	0.00809267	0.92832	0.0337719	0.0130693	0.29427	0.931637
Capza1	7.12141	4.4787	957.283	3.4641e-210	-0.587388	4.4787	2.77609	0.0956817	-0.987215	-0.00738809	0	0.112069
Car10	0.0247739	7.53927	0.405219	0.524406	0.0231196	7.53927	0.352915	0.552468	-0.00341332	0.0138983	0.544201	0.572312
Car13	0.250567	4.30462	4.19373	0.0405736	0.0462737	4.30462	0.143508	0.704818	-0.0869327	0.0224436	0.0505694	0.719163
Car2	0.34677	9.70908	210.735	9.49532e-48	-0.0167315	9.70908	0.49099	0.483486	-0.114764	0.000556996	0	0.505857
Car3	0.179863	3.83452	0.662922	0.41553	0.0709654	3.83452	0.104214	0.74683	-0.0472094	0.0251279	0.437784	0.759195
Car8	0.607769	6.15516	75.0497	4.59009e-18	-0.0327101	6.15516	0.217115	0.641247	-0.199646	-0.00237456	0	0.658148
Carf	-1.23077	4.48506	99.2643	2.20951e-23	0.113921	4.48506	0.847267	0.357327	0.398097	0.0393084	0	0.382446
Carkd	0.0670812	7.3133	2.42518	0.119399	-0.0121751	7.3133	0.0798866	0.777451	-0.0178939	0.00136338	0.137657	0.788156
Cars	-0.187442	7.13848	16.7837	4.18906e-05	-0.121762	7.13848	7.08204	0.00778602	0.0695632	-0.0360345	6.80373e-05	0.0107795
Cars2	0.330191	5.64604	14.9744	0.000108981	-0.126461	5.64604	2.19771	0.138216	-0.106011	-0.0381007	0.000147907	0.157699
Cartpt	-0.185153	5.74044	0.477316	0.48964	-0.300985	5.74044	1.26357	0.260977	0.0563972	-0.0798222	0.510321	0.285384
Casc1	0.309047	3.91935	4.24379	0.0393941	-0.00391549	3.91935	0.000772595	0.977825	-0.106036	0.00378775	0.0491762	0.978876
Casc4	0.141329	9.12815	42.4592	7.21718e-11	-0.0610187	9.12815	7.91407	0.00490517	-0.0434076	-0.014325	0	0.00704334
Casd1	1.628	6.42432	351.546	1.95174e-78	-0.171578	6.42432	3.98405	0.0459331	-0.497562	-0.0399069	0	0.0561071
Casp7	0.302797	3.41388	3.865	0.0493033	-0.0758332	3.41388	0.244719	0.620819	-0.0867814	-0.0149195	0.0606892	0.638624
Casp8	0.0792049	3.49939	0.244194	0.621194	0.0587237	3.49939	0.134446	0.713866	-0.0173914	0.0259337	0.637716	0.727851
Casp8ap2	0.36259	5.2639	18.9196	1.36342e-05	0.0112061	5.2639	0.0180639	0.893085	-0.119069	0.00839615	1.47907e-05	0.89808
Casp9	-7.93392	5.44963	1668.91	0	-0.65634	5.44963	4.31242	0.0378351	0.99285	-0.0040651	0	0.0466262
Casq2	0.530039	4.95352	16.2823	5.45706e-05	-0.0331554	4.95352	0.0644891	0.799536	-0.167412	-0.00900729	8.2828e-05	0.809425
Casz1	-0.358008	4.10671	8.48249	0.00358582	-0.109314	4.10671	0.790807	0.373856	0.11986	-0.0266914	0.00533649	0.398651
Cat	0.124012	7.56238	12.9624	0.000317818	-0.0402458	7.56238	1.36517	0.242643	-0.0372754	-0.0074002	0.000517675	0.266591
Catsper2	0.0340402	3.99778	0.035099	0.851388	0.379394	3.99778	4.03993	0.0444357	-0.00801192	0.132132	0.858725	0.0543647
Cav2	-0.685462	4.44463	22.1024	2.58485e-06	-0.0668108	4.44463	0.206632	0.64942	0.234991	-0.0134242	0	0.665952
Cbfa2t2	-5.46031	7.85471	45.5211	1.51002e-11	0.847541	7.85471	1.23531	0.266377	0.649087	0.101846	0	0.29085
Cbfa2t3	0.040358	3.72688	0.0604201	0.805833	-0.00802078	3.72688	0.00237169	0.961158	-0.00942822	0.00530003	0.814874	0.9631
Cbl	0.151812	6.0879	5.17618	0.0228986	-0.00630505	6.0879	0.00891485	0.924777	-0.0493005	0.00489638	0.0296524	0.928147
Cbll1	0.0974405	5.73665	1.86203	0.172391	-0.133525	5.73665	3.49739	0.0614657	-0.0278676	-0.0407293	0.192874	0.0735453
Cbln1	-0.48112	5.31686	37.708	8.2165e-10	-0.0573193	5.31686	0.532621	0.465507	0.172171	-0.00957643	0	0.488422
Cbr1	1.49372	6.91759	587.193	1.02224e-129	0.168543	6.91759	7.5496	0.00600235	-0.466365	0.0508567	0	0.00851058
Cbs	-0.0563012	5.52007	0.28679	0.592285	-0.143338	5.52007	1.85522	0.173178	0.024513	-0.0400099	0.609729	0.194817
Cbwd1	0.115713	5.59275	1.60103	0.205757	-0.0530061	5.59275	0.335499	0.562439	-0.0372066	-0.0108447	0.22757	0.581799
Cbx1	-0.405148	5.8272	26.8759	2.16946e-07	0.0994693	5.8272	1.61952	0.203159	0.142592	0.0394957	0	0.225833
Cc2d1a	-0.034537	7.29784	0.37901	0.538133	0.0100918	7.29784	0.032333	0.857299	0.0178728	0.00938897	0.55742	0.863961
Ccar1	-0.0536087	4.38945	0.239029	0.624908	0.157051	4.38945	2.05905	0.151304	0.0225369	0.061306	0.64126	0.171685
Ccdc106	-0.103941	5.14875	1.16043	0.281376	0.0461743	5.14875	0.229142	0.632161	0.0407806	0.0220024	0.304558	0.649221
Ccdc108	0.145893	3.65154	0.536379	0.463937	-0.0933641	3.65154	0.216953	0.641371	-0.0474593	-0.0177829	0.485126	0.658255
Ccdc111	-0.14731	4.22568	1.716	0.190208	-0.0720341	4.22568	0.410238	0.521849	0.0528451	-0.015412	0.211398	0.5426
Ccdc117	0.829762	5.26558	134.285	4.7322e-31	-0.0488317	5.26558	0.460422	0.497427	-0.275121	-0.0109626	0	0.519358
Ccdc12	-1.02387	4.12268	60.0305	9.33976e-15	-0.165128	4.12268	1.55666	0.212156	0.334067	-0.0430036	0	0.235075
Ccdc126	-0.0607931	5.17098	0.388037	0.533333	0.00178464	5.17098	0.000337349	0.985346	0.0235416	0.00645086	0.55288	0.985875
Ccdc127	-2.12673	8.02799	2772.27	0	-0.00674461	8.02799	0.0278331	0.867502	0.630073	0.00216005	0	0.873684
Ccdc130	-0.157051	4.38576	1.44346	0.22958	0.0344736	4.38576	0.0693832	0.792237	0.05191	0.0130619	0.252545	0.802278
Ccdc134	0.112364	5.57581	1.64044	0.200266	-0.0638141	5.57581	0.529052	0.467006	-0.0336035	-0.0156836	0.221867	0.489978
Ccdc135	-0.0587391	4.8038	0.2866	0.592408	0.0969254	4.8038	0.777828	0.377806	0.0317285	0.0393813	0.609839	0.402393
Ccdc141	1.31662	5.80579	327.956	2.67964e-73	-0.0352412	5.80579	0.233267	0.629112	-0.422254	-0.00692655	0	0.646292
Ccdc148	0.475148	5.98917	45.602	1.44892e-11	-0.0501052	5.98917	0.506963	0.476457	-0.15636	-0.0101376	0	0.499098
Ccdc163	-0.24908	3.31254	1.57215	0.209894	0.0407019	3.31254	0.0421955	0.837247	0.0896675	0.0191077	0.231735	0.845011
Ccdc17	0.155832	3.79244	1.76747	0.183695	0.12192	3.79244	1.08243	0.298154	-0.0438741	0.045814	0.204677	0.323313
Ccdc181	0.345209	4.20779	11.1992	0.000818314	0.0691941	4.20779	0.448909	0.502854	-0.11089	0.0310962	0.00129271	0.524878
Ccdc24	0.21748	5.17656	8.3964	0.00375964	-0.0430377	5.17656	0.328386	0.566611	-0.0703708	-0.00782132	0.00562047	0.585709
Ccdc28a	0.32199	7.81304	55.4231	9.71898e-14	-0.0105804	7.81304	0.0598337	0.806759	-0.105455	0.00287692	0	0.816007
Ccdc28b	0.447987	6.68259	37.6946	8.2733e-10	-0.0288719	6.68259	0.157048	0.691889	-0.146689	-0.00272021	0	0.706668
Ccdc30	-0.269534	3.50864	1.91209	0.166731	-0.281664	3.50864	2.08387	0.148863	0.0943243	-0.0819201	0.186996	0.16917
Ccdc32	0.330364	6.57981	50.4961	1.19403e-12	-0.0357716	6.57981	0.591181	0.441963	-0.10949	-0.00651268	0	0.465396
Ccdc34	0.0681092	5.09425	0.593263	0.44116	-0.0306071	5.09425	0.119744	0.729312	-0.0166974	-0.00201483	0.462742	0.742683
Ccdc41	-0.160426	6.81801	8.91792	0.00282386	0.116805	6.81801	4.72784	0.0296781	0.0601349	0.0466228	0.00428931	0.0374294
Ccdc43	0.150304	4.99906	3.53311	0.0601548	-0.0297157	4.99906	0.137884	0.710394	-0.0433706	-0.0038358	0.0728413	0.724547
Ccdc47	-0.2294	4.57215	5.47797	0.0192576	0.00513573	4.57215	0.00262862	0.95911	0.102285	0.000487118	0.0251383	0.960979
Ccdc50	0.0263448	8.76459	0.817135	0.366019	-0.0265409	8.76459	0.82936	0.362458	-0.00349109	-0.00286582	0.388564	0.38757
Ccdc55	0.450857	6.38454	41.8197	1.00089e-10	-0.0996754	6.38454	2.04461	0.152746	-0.148223	-0.0265521	0	0.173184
Ccdc58	0.266108	3.33967	2.24952	0.133656	0.147632	3.33967	0.695075	0.404444	-0.0896043	0.0616343	0.152824	0.428496
Ccdc73	0.415159	4.80663	18.7347	1.50224e-05	0.102492	4.80663	1.14202	0.285226	-0.139992	0.0451043	1.77489e-05	0.309954
Ccdc84	0.0673369	4.33621	0.276452	0.599036	0.249221	4.33621	3.7764	0.0519805	-0.0162471	0.0874553	0.616267	0.0628812
Ccdc85c	0.0820259	6.31267	1.25352	0.262882	0.00545368	6.31267	0.00556348	0.940542	-0.0215562	0.00938205	0.286138	0.943325
Ccdc88a	0.0371609	9.18737	1.59964	0.205954	-0.00994369	9.18737	0.114537	0.735037	-0.00735295	0.00277499	0.227747	0.748363
Ccdc88c	-0.185639	5.04612	2.961	0.0852951	0.0631169	5.04612	0.341572	0.558924	0.0710754	0.0249875	0.100763	0.578515
Ccdc9	-0.175154	5.36762	3.11559	0.0775464	-0.0746559	5.36762	0.565535	0.452039	0.0656264	-0.0185603	0.0921846	0.475246
Ccdc90b	0.177744	4.29743	1.89945	0.16814	-0.0318449	4.29743	0.0607892	0.805253	-0.060546	-0.00218389	0.188472	0.814649
Ccdc91	-0.417456	8.45631	127.283	1.61117e-29	-0.0026781	8.45631	0.00524378	0.942273	0.14843	0.00530045	0	0.944973
Ccdc93	-0.0654967	7.68132	2.76361	0.0964303	0.045262	7.68132	1.31981	0.250626	0.0279424	0.0219767	0.113096	0.274661
Cckbr	-0.064918	5.2175	0.661072	0.416182	-0.204896	5.2175	6.58973	0.0102569	0.0249722	-0.0659071	0.438385	0.013921
Ccl27a	0.881976	3.75816	40.0911	2.42393e-10	0.176004	3.75816	1.56967	0.210256	-0.290877	0.0591104	0	0.233161
Ccna2	0.0429644	4.68369	0.233351	0.62905	-0.0739624	4.68369	0.692191	0.40542	-0.00944323	-0.0250487	0.645082	0.429434
Ccnd1	0.256226	7.02949	26.8294	2.22228e-07	-0.038387	7.02949	0.602004	0.437815	-0.0835456	-0.00668266	0	0.461266
Ccnd2	-0.0151935	4.73299	0.0197549	0.888224	0.0723354	4.73299	0.451362	0.501689	0.00547442	0.0265693	0.893702	0.523739
Ccndbp1	0.182421	8.83721	29.4242	5.81458e-08	-0.0260344	8.83721	0.599475	0.438778	-0.0576626	-0.00267495	0	0.462245
Ccne1	0.0236274	4.69593	0.0469401	0.828476	-0.0197728	4.69593	0.033051	0.85574	-0.00199305	-0.00242834	0.836462	0.862458
Ccng2	0.242472	4.53076	5.50356	0.0189778	-0.165195	4.53076	2.55023	0.110278	-0.076122	-0.0371418	0.0247892	0.127919
Ccnh	0.135019	5.71444	3.65336	0.0559564	-0.0274061	5.71444	0.150278	0.69827	-0.039388	-0.000944194	0.0680609	0.712782
Ccni	-1.05781	8.4952	656.796	7.43263e-145	0.00555797	8.4952	0.0183249	0.89232	0.354719	0.00658365	0	0.897426
Ccnl2	-0.00972078	8.06857	0.0785077	0.77933	0.0106468	8.06857	0.0941792	0.75893	0.00784956	0.00983289	0.789469	0.770626
Ccnt2	-0.00201388	6.99743	0.00197849	0.964522	-0.0147601	6.99743	0.106417	0.744261	0.0055687	0.000497898	0.966248	0.756924
Ccnyl1	-5.90269	4.72864	917.349	1.66147e-201	-0.06406	4.72864	0.0681489	0.794051	0.96918	-0.000954886	0	0.804017
Ccr5	0.0352872	4.98	0.170261	0.67988	-0.115677	4.98	1.82979	0.176153	-0.00730256	-0.0369125	0.694243	0.197968
Ccrl1	0.0438378	3.68943	0.0999608	0.751877	-0.156826	3.68943	1.2635	0.26099	-0.0134591	-0.0413651	0.763467	0.285399
Ccrn4l	-0.285626	5.51763	15.313	9.1087e-05	0.183362	5.51763	6.30874	0.0120144	0.101514	0.0685457	0.000124242	0.0162195
Ccser2	7.71283	5.04875	1595.67	0	-0.668217	5.04875	3.49656	0.0614963	-0.992118	-0.00411883	0	0.0735749
Cct2	0.0938673	9.8221	23.6665	1.14561e-06	-0.0126816	9.8221	0.43198	0.511019	-0.0273818	0.00181016	0	0.532661
Cct4	-0.0253308	7.59318	0.408324	0.522822	-0.172957	7.59318	19.0349	1.28351e-05	0.013998	-0.0536308	0.542769	2.66233e-05
Cct5	-0.00852811	9.44857	0.105757	0.745027	0.0346045	9.44857	1.74139	0.186963	0.00812174	0.018179	0.756897	0.209209
Ccz1	0.00510993	5.61061	0.00423755	0.948097	0.0481631	5.61061	0.379098	0.538086	0.00558956	0.0242531	0.950549	0.558521
Cd164l2	0.290716	4.29576	4.75028	0.0292935	-0.338277	4.29576	6.42742	0.0112372	-0.0910499	-0.105217	0.0372903	0.0152108
Cd200	0.0229285	8.42354	0.591647	0.441783	-0.0043689	8.42354	0.0214868	0.88346	-0.00256563	0.00445301	0.463369	0.889022
Cd2ap	0.209059	6.99453	15.8546	6.83985e-05	0.00413397	6.99453	0.00620169	0.937231	-0.0678208	0.00781687	9.76187e-05	0.940006
Cd2bp2	0.500389	4.0848	19.4543	1.03035e-05	-0.0186146	4.0848	0.0270234	0.869426	-0.16759	-0.00971265	1.18326e-05	0.875474
Cd320	0.018024	5.5713	0.0424437	0.836776	-0.157469	5.5713	3.24542	0.0716233	0.00100916	-0.0463736	0.844692	0.0850318
Cd3eap	-0.14486	3.85146	1.01775	0.313054	-0.125259	3.85146	0.76068	0.383116	0.0575586	-0.0379133	0.336107	0.407546
Cd47	-0.276337	7.37656	29.8373	4.69873e-08	-0.0263415	7.37656	0.271353	0.602426	0.0992608	-0.00242298	0	0.620754
Cd55	0.226007	4.0861	3.22593	0.0724807	0.00518454	4.0861	0.00178689	0.966282	-0.0699942	0.00843773	0.0868185	0.968002
Cd59a	0.564921	6.54019	79.0067	6.18981e-19	-0.0415004	6.54019	0.426527	0.513698	-0.187197	-0.00800438	0	0.534998
Cd63	-0.219311	5.8005	4.47774	0.034339	-0.120806	5.8005	1.35987	0.24356	0.0784884	-0.0371511	0.0432687	0.267528
Cd68	-0.128943	4.31128	0.938913	0.332558	-0.210237	4.31128	2.49241	0.114397	0.0529932	-0.0666901	0.355447	0.132368
Cd72	0.0462935	6.94852	0.972633	0.324024	-0.0131946	6.94852	0.0790552	0.778582	-0.0102655	0.00105317	0.34675	0.789277
Cd74	-0.297574	4.31968	2.86106	0.0907478	0.0472063	4.31968	0.072535	0.787681	0.101654	0.0328065	0.107055	0.798065
Cd81	-0.168758	3.34301	1.21943	0.269472	0.206053	3.34301	1.81677	0.177699	0.0615844	0.0767475	0.292729	0.199589
Cd82	0.396707	6.94223	68.4023	1.33324e-16	0.0132118	6.94223	0.0759253	0.782897	-0.131747	0.0103157	0	0.793495
Cd97	-0.0476587	6.02892	0.420908	0.516484	-0.0852279	6.02892	1.34511	0.246134	0.0235732	-0.0229086	0.536512	0.270075
Cdadc1	0.124608	3.70234	0.706301	0.400674	-0.133646	3.70234	0.812088	0.367504	-0.0366702	-0.0369864	0.422994	0.392596
Cdan1	-0.482391	9.36918	309.029	3.5538e-69	-0.0123383	9.36918	0.202583	0.652644	0.170253	0.00165334	0	0.669138
Cdc14b	0.26513	4.2643	1.2769	0.258477	-0.119036	4.2643	0.257204	0.612047	-0.074778	-0.0321747	0.281547	0.629975
Cdc16	0.201659	7.90657	30.7269	2.97023e-08	-0.0553719	7.90657	2.31684	0.12798	-0.0650104	-0.0130248	0	0.146819
Cdc23	-0.0603601	6.5404	1.25604	0.262401	-0.0655669	6.5404	1.48194	0.22347	0.0268617	-0.0170059	0.285647	0.246969
Cdc27	-0.0733726	6.91796	2.08383	0.148867	0.00549681	6.91796	0.0116916	0.913895	0.0311947	0.00840272	0.168661	0.917631
Cdc37	-0.0390221	6.24821	0.381709	0.53669	0.0742589	6.24821	1.38296	0.239598	0.0172746	0.032368	0.556054	0.26342
Cdc42	0.112427	9.91093	29.8663	4.6288e-08	-0.0434492	9.91093	4.46101	0.0346769	-0.0336491	-0.00891506	0	0.0429315
Cdc42bpb	0.0402239	7.90221	0.742321	0.388919	0.0454362	7.90221	0.947213	0.33043	-0.00814025	0.021749	0.411386	0.355583
Cdc42ep2	-0.168551	5.48333	5.52347	0.018763	0.0332278	5.48333	0.214567	0.643211	0.0654929	0.0176912	0.0245792	0.660006
Cdc42se2	7.50024	7.17213	323.009	3.20193e-72	-0.105516	7.17213	0.0785711	0.779243	-0.982281	-0.0008341	0	0.789922
Cdc5l	-0.699805	6.90654	111.831	3.8918e-26	0.0401116	6.90654	0.368741	0.543691	0.239584	0.0178528	0	0.563834
Cdc73	-0.0676436	6.72729	1.33775	0.247432	0.0453713	6.72729	0.602047	0.437798	0.0282733	0.0234423	0.270723	0.461254
Cdca4	-0.0161715	4.67594	0.027106	0.869228	0.0636888	4.67594	0.419674	0.5171	0.0114339	0.0259015	0.875702	0.538054
Cdh10	-0.0246	5.94309	0.118165	0.731033	0.0151836	5.94309	0.045038	0.831934	0.0127623	0.0114257	0.743357	0.839956
Cdh11	5.72469	5.88689	780.308	1.03152e-171	-0.243828	5.88689	1.44167	0.229869	-0.959722	-0.00672818	0	0.253536
Cdh12	0.133916	5.80188	4.81315	0.0282434	0.00681145	5.80188	0.012443	0.911182	-0.041844	0.0107107	0.0360775	0.914992
Cdh13	-0.410742	6.37451	38.6069	5.1835e-10	-0.154519	6.37451	5.46428	0.019409	0.146563	-0.0470132	0	0.0251146
Cdh2	-0.0970791	6.91218	2.27045	0.131862	0.0521817	6.91218	0.65583	0.418036	0.0382802	0.0230139	0.150951	0.441958
Cdh22	0.190143	5.12517	4.26061	0.0390059	0.0618608	5.12517	0.452061	0.501358	-0.0591053	0.0352548	0.048691	0.523402
Cdh23	0.0942058	6.08382	1.74857	0.186057	0.046141	6.08382	0.419531	0.517171	-0.0267781	0.0227316	0.207236	0.53811
Cdh24	0.256872	3.68758	2.69799	0.100475	0.0242688	3.68758	0.0233543	0.878539	-0.0831893	0.0116348	0.117681	0.884393
Cdh7	0.0365708	6.84007	0.413597	0.520149	-0.150932	6.84007	7.04619	0.0079434	-0.00738658	-0.0465069	0.540219	0.0109925
Cdk10	-0.0489029	6.22356	0.507462	0.47624	-0.0921983	6.22356	1.80388	0.179244	0.0222009	-0.0263531	0.497166	0.201171
Cdk11b	0.102935	4.55568	0.548399	0.458973	0.001978	4.55568	0.000216357	0.988264	-0.0332536	0.00640473	0.480328	0.988706
Cdk13	-2.95649	3.94465	245.418	2.59066e-55	0.197731	3.94465	1.0406	0.307682	0.763744	0.0303357	0	0.332829
Cdk14	0.0757193	9.70595	8.225	0.00413172	-0.00106194	9.70595	0.00161816	0.967913	-0.0206412	0.00577255	0.00613223	0.969567
Cdk17	0.0921604	8.99307	13.5066	0.000237724	0.0148552	8.99307	0.350957	0.553572	-0.0268261	0.0116286	0.000369768	0.573403
Cdk18	-0.0977676	6.99968	2.76682	0.0962371	0.0113348	6.99968	0.0371799	0.847099	0.0385249	0.00938843	0.112921	0.854069
Cdk2ap1	3.06496	5.17815	622.903	1.7474e-137	-0.00310771	5.17815	0.000319083	0.985748	-0.779242	0.00609277	0	0.986268
Cdk4	6.94601	5.44812	1852.52	0	-0.0305713	5.44812	0.0214484	0.883564	-0.984575	-0.000617972	0	0.889114
Cdk5	-0.0390084	5.62152	0.291655	0.589162	0.0166932	5.62152	0.0534535	0.817159	0.0212228	0.0139101	0.606668	0.825964
Cdk5r1	0.0277991	8.26389	0.597398	0.439573	-0.0459713	8.26389	1.63341	0.201233	-0.00527344	-0.00921818	0.461269	0.223925
Cdk5rap3	0.106055	6.83012	3.07454	0.0795273	-0.0172925	6.83012	0.081802	0.77487	-0.0307501	-0.000429139	0.0943825	0.78576
Cdk8	-2.7804	5.61433	805.11	4.17843e-177	-0.0174357	5.61433	0.0313527	0.859456	0.744074	-0.000835521	0	0.86597
Cdkl1	0.0526169	6.57897	0.801831	0.370546	-0.022522	6.57897	0.146864	0.701551	-0.0130248	-0.00145639	0.392986	0.715971
Cdkl2	0.12763	6.10813	3.56506	0.0590078	-0.127523	6.10813	3.55909	0.0592202	-0.0392827	-0.038456	0.0715427	0.0710487
Cdkl3	0.311532	3.55681	3.73118	0.0534058	0.176696	3.55681	1.19386	0.274551	-0.103583	0.063642	0.0652241	0.299255
Cdkn1a	-0.742738	4.02772	36.2609	1.72595e-09	-0.13121	4.02772	1.12921	0.287944	0.252471	-0.0388592	0	0.312732
Cdkn1b	-0.106895	7.45505	6.67897	0.00975569	0.0435766	7.45505	1.10993	0.292097	0.0428868	0.0219459	0.0133797	0.317098
Cdkn2aipnl	0.0627671	6.76246	1.37572	0.240832	-0.0105275	6.76246	0.0387182	0.844008	-0.0166411	0.00216934	0.263884	0.851288
Cdon	0.0856388	4.1702	0.405958	0.524028	-0.0152094	4.1702	0.0129297	0.909469	-0.0254318	-0.00164907	0.543778	0.913359
Cds2	-4.85939	4.02427	333.443	1.7094e-74	-0.0577435	4.02427	0.0259889	0.871927	0.927684	-0.0120857	0	0.87792
Cdv3	0.868134	7.78056	547.523	4.35376e-121	-0.00429563	7.78056	0.0133224	0.90811	-0.286849	0.00456839	0	0.912152
Cdyl	0.064134	4.27891	0.313818	0.575347	0.0834248	4.27891	0.528389	0.467285	-0.0236117	0.03074	0.593832	0.49022
Cdyl2	-0.264659	5.80875	11.731	0.000614664	-0.0247586	5.80875	0.102615	0.748714	0.0950287	-0.00238493	0.00098802	0.760994
Ceacam1	0.170738	5.1579	0.479639	0.488586	0.137576	5.1579	0.313176	0.575738	-0.0443434	0.0470563	0.509262	0.594661
Ceacam2	0.294222	4.31271	2.20144	0.137881	0.178733	4.31271	0.815515	0.366495	-0.0807516	0.0631726	0.157326	0.391593
Cebpg	0.419873	7.59706	94.4167	2.55621e-22	-0.0384296	7.59706	0.791102	0.373767	-0.139584	-0.00685325	0	0.398536
Cecr2	-0.480801	4.07732	12.0587	0.000515522	0.121619	4.07732	0.771602	0.379722	0.169026	0.0471036	0.000831238	0.404206
Cecr5	0.016237	5.69944	0.0471028	0.828184	-0.0828609	5.69944	1.22301	0.268771	-0.0034252	-0.022719	0.836199	0.293386
Celf2	0.137742	8.17612	12.0209	0.000526086	-0.00175354	8.17612	0.00194876	0.964789	-0.042466	0.00558973	0.000843071	0.966546
Celf4	-0.00402393	9.00502	0.0237754	0.877458	0.0209101	9.00502	0.64192	0.423016	0.00741026	0.0133821	0.883508	0.446804
Celsr1	-0.0159629	3.44312	0.00526648	0.942148	0.158624	3.44312	0.549544	0.458504	0.00971906	0.0632625	0.94468	0.481497
Celsr2	-0.0498145	6.23044	0.511979	0.474284	-0.0224323	6.23044	0.103993	0.74709	0.0211768	-0.00387377	0.495288	0.759399
Cend1	-0.170359	7.19093	13.1279	0.000290928	-0.109524	7.19093	5.42628	0.0198359	0.0635008	-0.0316741	0.000464428	0.0256057
Cenpc1	0.129581	6.95759	4.82769	0.0280061	0.0321325	6.95759	0.29692	0.58582	-0.0409779	0.0173326	0.0358142	0.604757
Cenpo	-0.206596	5.89011	9.99172	0.00157246	0.103027	5.89011	2.48419	0.114995	0.0768561	0.0418558	0.00242863	0.133004
Cenpq	0.0856588	4.76552	0.609798	0.434864	0.12152	4.76552	1.22737	0.26792	-0.0256419	0.0511571	0.456595	0.292545
Cep120	0.712061	5.18776	58.9154	1.64601e-14	-0.0146729	5.18776	0.0249	0.874617	-0.235206	-0.00135737	0	0.880488
Cep135	0.14658	4.36346	1.35175	0.244973	0.0692647	4.36346	0.301787	0.582764	-0.0454201	0.0284115	0.268085	0.601745
Cep170	-0.0641955	8.04025	3.34193	0.0675354	-0.0532777	8.04025	2.3021	0.129199	0.0268486	-0.013436	0.0813105	0.148093
Cep170b	-0.100435	8.68961	17.4134	3.00691e-05	-0.0333675	8.68961	1.92193	0.165644	0.0403722	-0.00544135	4.43721e-05	0.186952
Cep19	-0.317613	5.93447	19.0818	1.25234e-05	-0.128361	5.93447	3.116	0.0775267	0.113705	-0.0375077	1.47907e-05	0.0917704
Cep192	0.230062	6.20406	11.1897	0.000822527	-0.075655	6.20406	1.21052	0.27123	-0.0724586	-0.0197198	0.00129862	0.295983
Cep250	-0.318324	7.17449	36.269	1.71878e-09	-0.0338909	7.17449	0.411306	0.521307	0.114932	-0.00566167	0	0.542121
Cep290	0.153524	8.3206	22.1354	2.54083e-06	-0.00536426	8.3206	0.026994	0.869496	-0.0472486	0.00458259	0	0.875539
Cep44	-0.187522	5.38642	3.87848	0.0489088	-0.0984432	5.38642	1.06865	0.301251	0.0692945	-0.0258839	0.0601775	0.326446
Cep63	0.403408	5.69965	20.551	5.80642e-06	-0.0166923	5.69965	0.0350356	0.851521	-0.132277	0.00139433	5.91628e-06	0.858207
Cep68	0.0427842	6.86927	0.726302	0.394085	0.0194949	6.86927	0.150817	0.697756	-0.01017	0.0135319	0.416651	0.712335
Cep70	-0.529135	5.85491	32.7394	1.05382e-08	-0.0273136	5.85491	0.0871741	0.767801	0.181608	-0.00487405	0	0.779
Cep72	0.73918	3.24762	12.2721	0.000459789	0.00654966	3.24762	0.000637851	0.979851	-0.23081	0.0093944	0.000733619	0.980813
Cep76	0.0174671	5.18853	0.0371923	0.847074	-0.087137	5.18853	0.922681	0.336772	-0.00256258	-0.0222792	0.854451	0.362085
Cep85	-0.0943403	4.12579	0.466097	0.494788	-0.102452	4.12579	0.547235	0.45945	0.0377647	-0.0186426	0.515456	0.482381
Cep85l	0.088503	5.54978	1.00253	0.316698	0.0423167	5.54978	0.229415	0.631958	-0.0255328	0.0219361	0.339704	0.649049
Cep97	0.290093	7.24225	44.4702	2.58254e-11	-0.00193156	7.24225	0.001979	0.964517	-0.0944362	0.00521554	0	0.966322
Cerk	-0.121329	8.81505	17.8146	2.43507e-05	0.00315146	8.81505	0.012018	0.912705	0.0472541	0.0070015	3.54977e-05	0.916512
Cers5	0.0974246	7.20411	3.58602	0.0582675	-0.0205213	7.20411	0.159136	0.689953	-0.0285931	-0.00071102	0.070673	0.704683
Cetn3	-10.5879	6.9425	440.032	1.0653e-97	0.00986889	6.9425	6.03252e-06	0.99804	0.998761	0.000285096	0	0.998198
Cfb	0.14047	3.82717	0.974356	0.323596	0.105377	3.82717	0.550191	0.45824	-0.0398104	0.0464005	0.346336	0.481237
Cfdp1	0.0421395	5.77483	0.371337	0.542276	-0.00816558	5.77483	0.0139759	0.905894	-0.00754691	0.00193919	0.561532	0.910072
Cfh	-4.82425	3.7354	228.018	1.61253e-51	0.286478	3.7354	0.814474	0.366801	0.924459	0.0191676	0	0.391904
Cfl2	-0.0296608	7.89133	0.803029	0.370189	-0.044989	7.89133	1.84728	0.1741	0.0164678	-0.00928058	0.392596	0.195814
Cga	-0.793016	5.48363	63.6498	1.48621e-15	-0.0593242	5.48363	0.36137	0.547746	0.257175	-0.0201897	0	0.567786
Cgnl1	0.128864	6.45628	3.67008	0.0553977	-0.136182	6.45628	4.09842	0.0429233	-0.0403385	-0.0415445	0.0674072	0.0526845
Cgrrf1	0.254517	5.25757	7.13725	0.00754987	-0.145248	5.25757	2.32653	0.127185	-0.0818319	-0.0453373	0.0105162	0.145993
Chac1	0.0557703	5.02161	0.280843	0.596149	0.0480189	5.02161	0.208715	0.647776	-0.0138984	0.0255803	0.613542	0.664372
Champ1	0.0234798	7.72152	0.39146	0.531533	-0.026191	7.72152	0.487073	0.485236	-0.00293142	-0.00277419	0.551259	0.507564
Chchd3	-0.0679426	4.90648	0.480434	0.488226	0.0616885	4.90648	0.396246	0.529034	0.0268791	0.0266257	0.508954	0.549735
Chchd6	-0.0664441	5.62889	0.717434	0.396987	-0.103581	5.62889	1.74479	0.186532	0.0258841	-0.0320662	0.419411	0.208735
Chd1	0.029745	6.47604	0.223295	0.63654	0.0310631	6.47604	0.243309	0.621826	-0.00674603	0.0156961	0.652374	0.63953
Chd2	0.0179743	6.8363	0.108758	0.741563	0.00247529	6.8363	0.00206395	0.963764	-0.000304033	0.0071097	0.753631	0.965641
Chd3	0.087083	10.2228	20.1547	7.14233e-06	0.00328718	10.2228	0.0287218	0.865423	-0.024911	0.00739125	8.87443e-06	0.871611
Chd4	0.123466	8.8206	12.1486	0.000491249	-0.00888793	8.8206	0.0629643	0.801871	-0.0376716	0.00315399	0.000801657	0.811557
Chd6	0.0747135	4.81919	0.399397	0.527401	0.0847988	4.81919	0.513511	0.473623	-0.0223238	0.0342027	0.54715	0.496261
Chd7	-0.20369	3.98527	3.04482	0.0809951	0.362317	3.98527	9.67035	0.00187266	0.0714402	0.135187	0.0960183	0.00280728
Chd8	-0.061042	7.5246	1.87969	0.17037	0.044689	7.5246	1.0075	0.315502	0.0266006	0.0216912	0.190717	0.340737
Chd9	-0.202857	3.44503	1.78305	0.181776	0.127539	3.44503	0.70567	0.400885	0.0751188	0.0464075	0.202618	0.425023
Chi3l1	-0.678816	4.44993	34.5153	4.22903e-09	0.00498374	4.44993	0.00190097	0.965223	0.228382	0.0137906	0	0.966969
Chmp1a	-0.249646	7.39905	36.5999	1.45042e-09	-0.064006	7.39905	2.4057	0.120894	0.0905668	-0.0154758	0	0.13929
Chmp2a	-0.106482	7.57958	5.51935	0.0188073	0.0260807	7.57958	0.33116	0.564977	0.0425025	0.0154254	0.0246117	0.584257
Chmp4b	-1.11901	8.60638	63.778	1.39261e-15	0.123377	8.60638	0.791307	0.373705	0.351942	0.042199	0	0.398459
Chmp5	-0.193477	6.52774	10.5435	0.00116599	0.0233319	6.52774	0.153104	0.695587	0.0735553	0.0150341	0.00176009	0.710288
Chn1	-0.223732	8.75938	64.517	9.57038e-16	-0.0630454	8.75938	5.12345	0.0236046	0.0825187	-0.0156192	0	0.0301139
Chp1	-0.137918	9.58109	40.5217	1.94444e-10	-0.0216128	9.58109	0.995167	0.318483	0.052898	-0.00115126	0	0.34392
Chpf	-0.0681065	5.9428	1.02549	0.311221	-0.0207048	5.9428	0.0947702	0.758198	0.0287725	-0.00125781	0.334261	0.769925
Chpf2	0.0401618	6.10294	0.392318	0.531084	0.0445438	6.10294	0.482631	0.487233	-0.00896467	0.0216645	0.550827	0.509469
Chpt1	0.390002	8.56462	133.638	6.55583e-31	0.015055	8.56462	0.199407	0.6552	-0.129871	0.0107511	0	0.671543
Chrd	-0.0373068	3.5853	0.0642906	0.799839	0.119114	3.5853	0.656023	0.417967	0.018304	0.0473852	0.809064	0.441893
Chrm2	0.0464915	6.51368	0.640653	0.423474	-0.0109949	6.51368	0.035857	0.849811	-0.0115186	0.00120621	0.445541	0.856566
Chrm3	-0.257307	5.71214	17.6643	2.63533e-05	0.00531995	5.71214	0.00755159	0.930751	0.0941596	0.0073356	4.1414e-05	0.933951
Chrna3	0.202828	4.39566	3.36966	0.0664076	-0.0818394	4.39566	0.547631	0.459287	-0.0762212	-0.0238457	0.0799793	0.482263
Chrna6	-0.601481	5.6487	55.6628	8.6033e-14	-0.0652153	5.6487	0.653044	0.419027	0.210269	-0.017032	0	0.442926
Chrna7	-0.0466175	4.34264	0.160348	0.688836	0.0278068	4.34264	0.0573154	0.81079	0.018343	0.016484	0.702704	0.81995
Chrnb1	0.341389	3.42724	4.97919	0.0256541	0.00225757	3.42724	0.000299278	0.986198	-0.10089	0.00848587	0.0328176	0.986709
Chrnb2	0.149568	4.59448	2.44893	0.117605	-0.0901811	4.59448	0.890305	0.345395	-0.0412135	-0.0195061	0.135646	0.370451
Chrnb3	-0.318579	5.12609	16.2394	5.58206e-05	0.0448254	5.12609	0.321669	0.570606	0.120392	0.0236922	8.2828e-05	0.589573
Chrnb4	0.0226125	4.79345	0.0455905	0.830922	0.159294	4.79345	2.27592	0.131397	-0.00199596	0.0670338	0.83884	0.15043
Chst10	-0.0400387	7.87013	1.43176	0.231477	0.0150888	7.87013	0.20336	0.652022	0.0189654	0.0115255	0.25448	0.668531
Chst11	0.0528258	3.39276	0.0894515	0.764876	0.262414	3.39276	2.27207	0.131724	-0.00827238	0.104822	0.775826	0.150806
Chst2	-0.312175	8.75903	98.655	3.00548e-23	-0.0214949	8.75903	0.468064	0.493879	0.112533	-0.00137429	0	0.515832
Chst3	1.16847	3.73543	41.5991	1.12045e-10	-0.203669	3.73543	1.24835	0.263868	-0.370771	-0.0504685	0	0.288437
Chst8	-0.145554	6.88106	8.10746	0.00440835	0.0419161	6.88106	0.672428	0.412207	0.0558422	0.0210983	0.00645762	0.436231
Chsy1	-1.35613	4.03654	130.713	2.86174e-30	0.00543251	4.03654	0.00128173	0.971441	0.440041	0.00830736	0	0.9728
Chtop	-0.08074	6.94432	2.81717	0.0932606	-0.0427786	6.94432	0.790852	0.373843	0.0329848	-0.00815946	0.109812	0.398624
Chuk	-9.01532	5.54659	246.609	1.42457e-55	0.272137	5.54659	0.36515	0.54566	0.992537	0.00105248	0	0.565878
Cib2	0.0705597	5.90046	1.3184	0.25088	0.0159193	5.90046	0.0671205	0.795576	-0.0187862	0.012175	0.27422	0.805538
Cic	0.0435003	4.29028	0.101019	0.75061	-0.219802	4.29028	2.57938	0.108264	-0.00963175	-0.06265	0.762242	0.125795
Cit	0.189105	9.39667	51.0988	8.78316e-13	-0.0255176	9.39667	0.930681	0.334686	-0.0602251	-0.00274817	0	0.359953
Ckap4	0.13585	6.08766	3.95107	0.0468416	0.0993542	6.08766	2.11373	0.145983	-0.0436534	0.0420016	0.0577755	0.166106
Ckb	-0.139025	9.02044	34.7076	3.83131e-09	-0.0361129	9.02044	2.34182	0.125942	0.0536166	-0.00635491	0	0.144594
Ckmt1	0.0600332	9.66248	8.25224	0.00407018	-0.0268187	9.66248	1.64692	0.199379	-0.0154874	-0.00307926	0.00603165	0.221899
Clasp1	0.374095	7.78219	109.117	1.53018e-25	-0.0900436	7.78219	6.32053	0.0119348	-0.123702	-0.0240047	0	0.0161189
Clasrp	-0.0231935	4.06324	0.0317307	0.85862	0.0758474	4.06324	0.338317	0.560802	0.016569	0.0364809	0.865754	0.580358
Clcn2	-0.278344	3.30364	3.33484	0.0678268	0.050678	3.30364	0.110529	0.739543	0.104745	0.0269524	0.0816861	0.752563
Clcn3	0.0484558	8.90515	2.46595	0.116337	-0.00202134	8.90515	0.00429129	0.94777	-0.0116125	0.00542961	0.134406	0.950114
Clcn4-2	0.357696	7.98282	132.723	1.03956e-30	-0.0157373	7.98282	0.256678	0.612412	-0.11771	0.00127739	0	0.630306
Clcn6	0.124497	6.06469	3.49247	0.0616487	-0.00207191	6.06469	0.000974216	0.9751	-0.0376031	0.00417631	0.0745215	0.976477
Clcn7	0.0761219	7.10306	3.05219	0.0806282	-0.0597941	7.10306	1.88314	0.169977	-0.02178	-0.0141581	0.0955776	0.19146
Cldn12	-0.167263	8.64336	43.0527	5.32859e-11	-0.0154406	8.64336	0.366843	0.54473	0.0631093	0.000871886	0	0.564913
Cldn25	0.604265	8.87436	476.648	1.14615e-105	-0.0446712	8.87436	2.60807	0.106321	-0.200989	-0.00873306	0	0.123704
Clgn	0.281834	5.44725	9.22591	0.00238614	-0.161503	5.44725	3.02928	0.0817741	-0.0937952	-0.0499998	0.0036326	0.0965124
Clic1	0.142607	4.73196	1.06381	0.302347	-0.114106	4.73196	0.681744	0.408987	-0.0457378	-0.0365734	0.32562	0.432871
Clic4	0.142162	8.4629	27.1165	1.91555e-07	-0.0644456	8.4629	5.57234	0.0182464	-0.0441568	-0.0159385	0	0.0236947
Clic5	-0.0231245	5.01141	0.0842804	0.771578	0.0130972	5.01141	0.0270389	0.869389	0.0113226	0.0093085	0.782225	0.875436
Clint1	-0.458658	6.90673	93.2119	4.69858e-22	-0.0125103	6.90673	0.0692415	0.792444	0.161792	0.00161853	0	0.802464
Clip1	-0.136364	5.90091	4.49071	0.0340796	-0.0230713	5.90091	0.128653	0.719833	0.0510356	-0.00354955	0.0429493	0.733616
Clip2	-0.0497307	8.55779	2.52056	0.11237	-0.0705123	8.55779	5.06713	0.0243837	0.0225039	-0.0179726	0.13009	0.0310901
Clip3	0.0638785	9.37125	5.57581	0.0182103	-0.00656797	9.37125	0.0589466	0.808169	-0.016446	0.00400733	0.02389	0.817379
Clk1	-0.147689	6.2086	5.74092	0.0165741	-0.122394	6.2086	3.94292	0.0470691	0.0566209	-0.0366704	0.0219849	0.0574028
Clk2	0.0326679	5.09343	0.136434	0.711852	-0.151077	5.09343	2.92911	0.0869953	-0.00272109	-0.0486003	0.724458	0.102506
Clk4	-0.180897	5.68641	6.39401	0.0114506	-0.047808	5.68641	0.446616	0.503946	0.0690863	-0.0102075	0.0155391	0.525884
Clmn	0.0884473	9.32632	16.2347	5.59606e-05	0.00692039	9.32632	0.0993894	0.752564	-0.0250137	0.00891906	8.2828e-05	0.764621
Clmp	-0.393063	6.55399	40.1947	2.29872e-10	0.0565718	6.55399	0.832514	0.361547	0.141076	0.024761	0	0.386671
Cln3	-0.188606	4.65246	2.54078	0.11094	0.0482214	4.65246	0.166501	0.683241	0.0680509	0.0217474	0.128478	0.698204
Clock	-0.044372	7.27026	0.835396	0.360717	0.00162933	7.27026	0.00112283	0.973269	0.0206031	0.0063054	0.383328	0.974658
Clp1	0.0519831	4.83155	0.328109	0.566775	-0.0890705	4.83155	0.962702	0.326507	-0.0150899	-0.0245895	0.585449	0.351838
Clpb	0.100733	4.98664	1.31936	0.250708	-0.0319879	4.98664	0.132985	0.715357	-0.0299194	-0.00329589	0.274036	0.729348
Clptm1	0.0524205	6.40408	0.702169	0.402056	-0.0121649	6.40408	0.0377693	0.845907	-0.0125624	0.00315847	0.42434	0.852986
Clstn1	-0.101494	9.51708	18.3228	1.86467e-05	-0.0220889	9.51708	0.867916	0.351533	0.0403542	-0.00140793	2.66233e-05	0.376563
Clstn2	-0.347404	8.96213	199.13	3.23368e-45	-0.0292969	8.96213	1.41608	0.23405	0.124926	-0.00382303	0	0.257574
Clstn3	-0.0392338	10.1977	3.56991	0.0588356	0.0307317	10.1977	2.19037	0.138876	0.0187573	0.0167979	0.0713356	0.158394
Cluap1	0.0154403	5.32749	0.0213013	0.883961	0.0961588	5.32749	0.827316	0.36305	-0.000378172	0.0382271	0.889706	0.388135
Cluh	0.138772	7.30964	8.75244	0.00309188	0.0452834	7.30964	0.931883	0.334374	-0.0428658	0.0211744	0.00467386	0.359666
Clvs1	0.0411589	6.19119	0.42197	0.515956	-0.00803109	6.19119	0.0160434	0.899208	-0.00980811	0.00368496	0.535938	0.90384
Cmas	0.0533041	9.14507	4.47621	0.03437	0.00372185	9.14507	0.0218237	0.882557	-0.0132877	0.00755348	0.0433013	0.888162
Cmc1	-0.261773	3.73205	2.16437	0.141243	0.10022	3.73205	0.323407	0.569567	0.087223	0.0439676	0.160855	0.588596
Cml1	-1.02553	4.62014	74.3952	6.39434e-18	-0.0933869	4.62014	0.613431	0.433499	0.333151	-0.0216838	0	0.457083
Cmpk2	-0.0205788	5.4776	0.0621738	0.803093	-0.00976675	5.4776	0.0139338	0.906035	0.0145174	0.00519276	0.812253	0.910182
Cmss1	-0.495216	5.01674	24.4284	7.71224e-07	-0.135013	5.01674	1.8161	0.177778	0.170602	-0.0412665	0	0.199683
Cmtm5	0.0954337	7.57616	3.4065	0.0649401	-0.0264115	7.57616	0.260912	0.609494	-0.0278549	-0.00258835	0.0782754	0.627514
Cmtm6	-0.0883557	5.76458	2.15795	0.141834	0.0381004	5.76458	0.401298	0.52642	0.0363711	0.0206336	0.161447	0.547144
Cmtm7	-0.0607442	4.01277	0.209252	0.647354	-0.0394587	4.01277	0.087552	0.767313	0.0276126	-0.0014833	0.662961	0.778545
Cmtm8	-0.0444529	3.55753	0.0860363	0.769278	-0.274041	3.55753	3.3099	0.0688635	0.0109537	-0.091527	0.780086	0.0819317
Cnbd2	-0.369417	5.90612	27.2566	1.78163e-07	0.0938528	5.90612	1.75934	0.184707	0.131178	0.0379277	0	0.206866
Cnep1r1	0.112834	4.95182	1.76697	0.183758	0.131964	4.95182	2.41658	0.120057	-0.0311565	0.0478995	0.204739	0.138471
Cnih	-7.98175	5.38209	224.684	8.60503e-51	0.0831294	5.38209	0.050185	0.822742	0.986679	-0.00173659	0	0.831265
Cnih4	-0.325648	6.00913	38.648	5.07562e-10	-0.00396341	6.00913	0.00573429	0.939638	0.118167	0.00450376	0	0.942435
Cnot1	0.0880943	5.1443	0.171368	0.678899	0.163597	5.1443	0.589903	0.442457	-0.0211566	0.0575719	0.693267	0.465836
Cnot2	0.127492	5.68799	1.87134	0.171322	-0.0862	5.68799	0.855963	0.354871	-0.0367683	-0.0229618	0.191809	0.379864
Cnot4	0.0328672	6.65785	0.275218	0.599853	0.0144358	6.65785	0.0532009	0.817584	-0.00495034	0.0124199	0.617086	0.826322
Cnot6	-2.96063	4.40752	332.31	3.01799e-74	0.219783	4.40752	1.79469	0.180356	0.763805	0.0327975	0	0.202387
Cnot6l	0.0248251	6.44297	0.20805	0.6483	-0.126292	6.44297	5.38157	0.0203506	-0.00614907	-0.0377794	0.663852	0.0262624
Cnp	-0.123432	8.51008	19.1015	1.23948e-05	0.0288313	8.51008	1.04222	0.307306	0.0479325	0.0160189	1.47907e-05	0.332448
Cnpy2	-0.183283	7.1396	15.52	8.16354e-05	0.048094	7.1396	1.06862	0.301256	0.0682083	0.0230452	0.000112409	0.326452
Cnpy3	-0.0351527	5.32538	0.221761	0.637701	-0.125439	5.32538	2.82713	0.092684	0.0156437	-0.0393925	0.653495	0.108836
Cnr1	-0.0824001	6.04159	1.50848	0.219371	-0.0117725	6.04159	0.0308932	0.860479	0.0337369	0.000154939	0.242	0.866955
Cnrip1	-0.00458809	3.47795	0.000964835	0.97522	-0.239821	3.47795	2.99966	0.0832821	0.00386261	-0.0798985	0.976503	0.0983494
Cntd1	0.00797439	7.00995	0.0289457	0.864904	0.0160672	7.00995	0.117523	0.731736	0.00237107	0.0120901	0.871744	0.74518
Cntfr	-0.152272	6.35486	5.00284	0.0253058	0.0220811	6.35486	0.105055	0.745846	0.0577516	0.0120308	0.0324064	0.758222
Cntln	-0.15793	5.16584	2.5864	0.107785	-0.080729	5.16584	0.676839	0.410677	0.0582518	-0.0246406	0.125174	0.434566
Cntn1	0.0869631	11.2632	38.127	6.62851e-10	-0.0177606	11.2632	1.59041	0.207268	-0.0248854	5.60531e-05	0	0.230126
Cntn2	-0.0535954	8.46553	3.0541	0.0805337	-0.00971611	8.46553	0.100382	0.751371	0.0241018	0.00295908	0.0954593	0.763529
Cntn4	0.104056	7.67284	4.2963	0.0381953	0.0682263	7.67284	1.84708	0.174123	-0.0308184	0.0295897	0.0477562	0.195829
Cntn6	0.0308684	5.72344	0.16126	0.687999	0.0636707	5.72344	0.687474	0.407025	-0.00330387	0.0321216	0.701911	0.430987
Cntnap1	0.302053	8.40279	92.1897	7.87521e-22	0.0100866	8.40279	0.102833	0.748456	-0.0989103	0.00970919	0	0.760722
Cntnap2	-0.0824408	5.77992	1.41087	0.234912	0.0230668	5.77992	0.11055	0.739519	0.0333401	0.0148098	0.257823	0.752554
Cntnap3	-0.213743	3.86284	1.5274	0.216503	-0.157183	3.86284	0.824991	0.363725	0.0830372	-0.0513575	0.239012	0.388821
Cntnap5a	-0.00125439	6.21003	0.00032744	0.985563	-0.0538773	6.21003	0.608826	0.43523	0.00492119	-0.0130595	0.986188	0.458737
Cntrob	0.0105962	5.15404	0.0158047	0.899956	0.0467085	5.15404	0.307323	0.579327	0.00299659	0.0236259	0.904881	0.598284
Cobl	0.273816	5.80996	12.1537	0.000489916	-0.38315	5.80996	23.8012	1.06818e-06	-0.0863132	-0.124	0.000798698	0
Cog1	-0.31248	3.75375	5.28829	0.0214693	-0.0325222	3.75375	0.0579425	0.809778	0.112062	-0.00731568	0.0278184	0.818938
Cog2	-0.0405445	6.6249	0.469431	0.493249	0.107656	6.6249	3.30988	0.0688647	0.0190315	0.0436112	0.513921	0.0819317
Cog6	-0.0636816	7.5798	2.61367	0.105946	-0.024608	7.5798	0.39027	0.532158	0.0272105	-0.00228781	0.123372	0.552918
Coil	-0.166222	6.76545	8.03429	0.00459	-0.0232045	6.76545	0.156628	0.692281	0.0630262	-0.00206636	0.0067209	0.707061
Col11a1	-0.16515	5.77425	3.2498	0.071432	-0.106052	5.77425	1.33945	0.24713	0.0639465	-0.02938	0.0856619	0.271117
Col11a2	-0.275679	6.27797	11.8952	0.000562799	-0.0583715	6.27797	0.534001	0.46493	0.0972364	-0.013959	0.000905192	0.487827
Col12a1	-0.387898	3.50952	5.17134	0.0229625	0.0678712	3.50952	0.16393	0.685564	0.132895	0.0328253	0.0297264	0.700429
Col16a1	0.204607	6.4939	8.19354	0.00420399	0.0278317	6.4939	0.151754	0.696865	-0.0632277	0.0146409	0.00625943	0.711484
Col1a2	-0.269657	4.54162	1.87736	0.170635	-0.252203	4.54162	1.64726	0.199332	0.0881889	-0.0764869	0.19101	0.221846
Col23a1	-0.195103	4.2557	0.485688	0.485857	-0.309207	4.2557	1.20747	0.271834	0.0692064	-0.095455	0.506611	0.296492
Col24a1	-1.07351	3.59655	25.0471	5.59475e-07	0.197884	3.59655	0.849371	0.35673	0.345701	0.0705853	0	0.381878
Col27a1	0.227522	4.89999	3.35312	0.067078	-0.0259266	4.89999	0.0432607	0.835235	-0.0704006	-0.00185004	0.080778	0.843076
Col4a2	0.105689	7.50775	5.0014	0.0253268	-0.0407214	7.50775	0.742393	0.388895	-0.0315568	-0.00760382	0.0324183	0.413125
Col4a3bp	-5.2071	5.0814	735.376	6.07009e-162	0.538439	5.0814	6.61627	0.0101051	0.942966	0.023749	0	0.0137731
Col8a1	0.182259	5.30407	8.31583	0.00393011	-0.0177082	5.30407	0.0783129	0.779597	-0.0557025	0.00215395	0.00586008	0.790226
Col9a2	0.525765	5.34955	19.8752	8.26656e-06	0.0724699	5.34955	0.378753	0.538272	-0.168839	0.0307105	8.87443e-06	0.558704
Colgalt2	0.356885	5.35342	20.8426	4.98605e-06	-0.138103	5.35342	3.11965	0.0773532	-0.119715	-0.0411569	2.95814e-06	0.0915634
Commd1	0.0259984	5.15225	0.115456	0.734016	-0.549331	5.15225	51.5813	6.86934e-13	-0.00511671	-0.182475	0.746271	0
Commd10	-0.313061	4.27176	4.57992	0.0323487	-0.0180848	4.27176	0.0155157	0.90087	0.115552	-0.000690313	0.0408874	0.905375
Commd2	0.0761389	6.52884	1.11282	0.291471	-0.036546	6.52884	0.256413	0.612595	-0.0202766	-0.00610607	0.314897	0.630451
Commd9	0.249835	7.34126	29.0058	7.21636e-08	-0.0585381	7.34126	1.59279	0.206928	-0.0814835	-0.0143773	0	0.229759
Comtd1	0.0765649	4.25255	0.518171	0.471623	-0.0547067	4.25255	0.264523	0.607029	-0.0197955	-0.0110293	0.492717	0.625097
Copb1	0.199045	7.88128	20.4301	6.18478e-06	-0.0100841	7.88128	0.0524317	0.818885	-0.0635592	0.00275967	5.91628e-06	0.827635
Copb2	0.0486898	9.1856	3.29759	0.0693815	-0.0228517	9.1856	0.726356	0.394067	-0.0116481	-0.00155973	0.0835084	0.417968
Coprs	0.0521417	7.68295	1.34187	0.246705	0.0218281	7.68295	0.235194	0.627699	-0.0125791	0.0137769	0.269951	0.644934
Cops2	0.551157	5.65948	74.3691	6.47955e-18	-0.1215	5.65948	3.59961	0.0577931	-0.182558	-0.0328209	0	0.0694808
Cops3	0.701348	6.76179	132.135	1.39782e-30	-0.138673	6.76179	5.17645	0.0228951	-0.232686	-0.0405657	0	0.0292827
Cops5	4.68553	7.53897	1421.98	0	-0.131072	7.53897	1.28079	0.257752	-0.920862	-0.00367771	0	0.281991
Cops7a	0.0926966	7.62001	4.37893	0.0363858	-0.0150229	7.62001	0.115038	0.734479	-0.0270028	0.00115032	0.0456471	0.747812
Cops7b	0.125377	4.10295	1.30862	0.252645	0.0476958	4.10295	0.189052	0.663707	-0.0376936	0.0205839	0.275891	0.679766
Cops8	0.0161142	7.79794	0.225027	0.635236	0.0216045	7.79794	0.404494	0.524777	-0.000730342	0.0137674	0.651093	0.545449
Copz2	0.429119	4.50694	8.58392	0.00339145	-0.0677034	4.50694	0.214893	0.642959	-0.130569	-0.0183011	0.00506434	0.659796
Coq10a	0.0249717	6.74057	0.157697	0.691286	0.033375	6.74057	0.28172	0.595576	-0.00312149	0.017665	0.704928	0.614202
Coq10b	-0.191508	6.28875	8.23503	0.00410895	-0.0766956	6.28875	1.32079	0.25045	0.0718007	-0.0196996	0.0060849	0.274492
Coq2	9.14783	5.15672	1824.81	0	0.532613	5.15672	2.88039	0.0896642	-0.99858	0.00142045	0	0.105576
Coq5	0.193019	6.02163	5.1818	0.0228247	0.0276076	6.02163	0.106157	0.744563	-0.0600885	0.0164806	0.0295489	0.757202
Coro1a	-0.0834682	5.64456	0.848049	0.357105	0.14533	5.64456	2.57107	0.108834	0.0335111	0.0568907	0.379965	0.126431
Coro1c	3.2128	5.95806	915.991	3.27818e-201	0.0545109	5.95806	0.267893	0.604749	-0.800063	0.0090637	0	0.622902
Coro2a	0.0359656	6.96516	0.704619	0.401236	0.00420661	6.96516	0.00963663	0.9218	-0.00723733	0.00788019	0.42352	0.92526
Coro2b	0.0771457	7.9713	4.86874	0.0273475	-0.018362	7.9713	0.275748	0.599501	-0.0220861	0.000618994	0.0349859	0.617953
Cox11	0.167098	4.10994	1.82829	0.176329	-0.0246506	4.10994	0.0392022	0.843049	-0.0593119	-0.00226249	0.197021	0.850321
Cox14	-0.225225	7.23622	22.0198	2.69846e-06	0.0542309	7.23622	1.27709	0.258441	0.081415	0.0251143	0	0.282778
Cox17	0.282603	4.37706	7.35291	0.00669544	0.0439461	4.37706	0.177933	0.673156	-0.0864736	0.0199758	0.00949268	0.688721
Cox18	-0.487617	4.78721	15.8743	6.76906e-05	0.116218	4.78721	0.904192	0.34166	0.163016	0.0447953	9.76187e-05	0.366869
Cox19	-0.485899	7.24616	75.9224	2.95034e-18	-0.0378351	7.24616	0.461032	0.497142	0.170767	-0.00620841	0	0.519086
Cox5b	-7.43675	3.57473	645.508	2.1181e-142	0.63946	3.57473	3.06513	0.0799888	0.995074	0.00492611	0	0.0945245
Cox7a2	-8.10987	5.59058	1253.49	1.44538e-274	1.07255	5.59058	10.0114	0.00155578	0.991726	0.00619069	0	0.0023606
Cox7a2l	9.15889	6.3128	2780.85	0	-0.124622	6.3128	0.121898	0.726985	-0.998012	-0.00037542	0	0.740453
Cox8a	8.20911	10.0204	4136.31	0	-0.0489562	10.0204	0.175074	0.675641	-0.993031	-0.00022297	0	0.691152
Cpd	-0.0772141	7.65352	3.24726	0.0715429	0.0870006	7.65352	4.12223	0.0423232	0.0321064	0.0357932	0.0857743	0.0519272
Cpe	-0.220898	11.3853	207.336	5.23742e-47	-0.0375736	11.3853	6.00177	0.0142915	0.0817473	-0.00681573	0	0.0188759
Cpeb1	-0.949573	4.18824	64.2996	1.06866e-15	0.174012	4.18824	2.12855	0.144577	0.319854	0.0601083	0	0.164627
Cpeb3	0.14314	4.89395	0.842998	0.358541	0.136349	4.89395	0.759973	0.383337	-0.0503729	0.0493676	0.381387	0.407741
Cpeb4	-0.00334038	7.22931	0.00505577	0.943315	-0.0240712	7.22931	0.262655	0.608302	0.00568703	-0.00136429	0.945828	0.626348
Cped1	0.614094	4.28375	12.8992	0.000328722	-0.214587	4.28375	1.58126	0.20858	-0.198556	-0.0623173	0.000529507	0.231481
Cplx2	0.372639	6.93449	49.697	1.79417e-12	0.0144527	6.93449	0.0751049	0.784044	-0.122682	0.0110188	0	0.794625
Cpm	0.661317	7.62804	256.98	7.81194e-58	0.0402791	7.62804	0.953906	0.328727	-0.219192	0.0195462	0	0.353995
Cpne1	-0.0788089	8.62732	6.2291	0.0125668	-0.0423017	8.62732	1.79475	0.180349	0.0323566	-0.0084508	0.0169679	0.202375
Cpne4	-0.100067	7.9001	8.0491	0.00455264	0.0194945	7.9001	0.305492	0.58046	0.0394923	0.0129324	0.00667949	0.599462
Cpne5	-0.456429	5.13527	26.246	3.00584e-07	-0.147167	5.13527	2.72671	0.0986826	0.162314	-0.0447744	0	0.115285
Cpne6	0.0291827	6.08379	0.17321	0.677275	-0.0219363	6.08379	0.0979113	0.754351	-0.0035761	-0.00114138	0.691682	0.766283
Cpne7	-0.46729	8.60704	202.383	6.3055e-46	-0.027858	8.60704	0.719887	0.396181	0.165422	-0.00330184	0	0.42008
Cpne8	0.507582	4.8689	11.7822	0.000598013	-0.0498308	4.8689	0.11361	0.736071	-0.157588	-0.0110318	0.00095548	0.749235
Cpne9	-0.0239425	7.22717	0.174538	0.67611	-0.047558	7.22717	0.688882	0.406545	0.0129661	-0.0108949	0.690578	0.430534
Cpox	0.00726049	7.93922	0.0439435	0.833959	-0.0347379	7.93922	1.00596	0.315873	0.00256843	-0.00589928	0.841985	0.341148
Cpsf2	0.0124221	3.85549	0.00823682	0.927686	0.058965	3.85549	0.185691	0.666528	0.000155886	0.021882	0.930874	0.682384
Cpsf3	0.188135	5.94962	4.59116	0.0321372	0.0106454	5.94962	0.0147121	0.903459	-0.0606834	0.0103399	0.040633	0.907724
Cpsf3l	-0.0408707	7.7197	1.02624	0.311043	0.0114302	7.7197	0.0802555	0.776951	0.0199183	0.0100971	0.334107	0.787682
Cpsf4	0.392747	5.24985	20.1937	6.99844e-06	-0.0653807	5.24985	0.559269	0.454555	-0.127709	-0.0157657	8.87443e-06	0.477628
Cpsf6	-0.0629601	9.60377	7.4107	0.00648369	-0.0371739	9.60377	2.58352	0.107981	0.0270232	-0.00672395	0.00921461	0.125502
Cpsf7	-1.28166	4.27774	87.4243	8.757e-21	0.159254	4.27774	1.34782	0.24566	0.41004	0.0520759	0	0.269602
Cpt1c	-0.0417051	6.76465	0.439701	0.507267	-0.00994565	6.76465	0.0250247	0.874305	0.0197627	0.00246364	0.527472	0.880172
Cradd	0.834523	3.98162	55.3565	1.00537e-13	-0.21327	3.98162	3.58209	0.0584057	-0.274161	-0.0629645	0	0.0701139
Cramp1l	0.102969	6.65355	3.76178	0.0524368	0.0122503	6.65355	0.0532717	0.817465	-0.0297982	0.0101938	0.064168	0.826248
Crb1	-0.0381818	4.40686	0.0867696	0.768325	-0.00643826	4.40686	0.00238777	0.961027	0.0206943	0.0077977	0.779175	0.962949
Crbn	-0.0385491	5.88527	0.412793	0.520555	-0.0435931	5.88527	0.52809	0.467411	0.0186419	-0.0111118	0.540568	0.490333
Creb3	0.217078	7.34411	22.1746	2.48944e-06	0.0255564	7.34411	0.307278	0.579355	-0.0692487	0.0142838	0	0.59832
Creb3l2	0.380019	5.09935	14.7962	0.000119777	-0.0729713	5.09935	0.544596	0.460534	-0.124982	-0.0168822	0.000177489	0.483452
Crebbp	4.09623e-05	6.17909	3.70104e-07	0.999515	-0.0734618	6.17909	1.20277	0.272769	0.00550267	-0.0189249	0.999539	0.297477
Crebl2	-0.288494	8.74534	96.6811	8.14424e-23	-0.0305956	8.74534	1.08773	0.296974	0.10487	-0.00445804	0	0.322097
Crebrf	-0.154855	9.17002	35.3965	2.68972e-09	0.0100614	9.17002	0.149442	0.69907	0.0587782	0.0096823	0	0.713599
Crebzf	0.0409592	5.87959	0.422417	0.515734	-0.140434	5.87959	4.96821	0.0258173	-0.00760786	-0.0413839	0.535675	0.0328738
Creg1	0.415745	7.49899	95.3154	1.62346e-22	-0.00216848	7.49899	0.0025889	0.95942	-0.136978	0.00468104	0	0.961284
Crhr1	-0.164279	5.11313	3.1248	0.0771092	-0.177877	5.11313	3.66216	0.0556614	0.0633309	-0.0556875	0.0916906	0.0671439
Crim1	-0.200325	8.91087	30.2714	3.75621e-08	-0.00226111	8.91087	0.00386108	0.950453	0.0739866	0.00494273	0	0.952661
Crk	-0.327988	7.06693	46.4809	9.2515e-12	0.094895	7.06693	3.89051	0.0485596	0.11713	0.0380471	0	0.0590031
Crlf3	0.053262	5.45624	0.388519	0.533079	-0.199472	5.45624	5.45083	0.019559	-0.012004	-0.0628039	0.552649	0.0252625
Crnkl1	-0.0864688	7.37374	2.53139	0.111602	-0.0660797	7.37374	1.47849	0.224011	0.0352657	-0.0168095	0.129274	0.247505
Crot	-0.399565	6.4143	28.5039	9.35121e-08	-0.15496	6.4143	4.29179	0.0382968	0.140509	-0.0471824	0	0.0472031
Crtac1	-1.13506	4.08667	62.0021	3.43096e-15	-0.0957376	4.08667	0.4397	0.507267	0.367517	-0.0234591	0	0.529105
Crtc1	0.00307972	3.91534	0.000611188	0.980277	-0.152561	3.91534	1.59369	0.2068	0.00393211	-0.0508859	0.981145	0.229632
Crtc3	0.0386377	5.39663	0.184781	0.667296	-0.0318561	5.39663	0.125388	0.723263	-0.00782468	-0.00244646	0.682047	0.736953
Crybg3	0.278728	5.89229	16.7867	4.18249e-05	0.0649173	5.89229	0.91061	0.339953	-0.0891452	0.0297802	6.80373e-05	0.365177
Cs	0.0592167	9.2726	5.29609	0.0213733	-0.019285	9.2726	0.56171	0.453572	-0.0152903	-0.000381506	0.0276941	0.476764
Csdc2	-0.124605	7.94061	12.2146	0.000474165	-0.0167408	7.94061	0.220432	0.638711	0.0479895	0.000631728	0.000766159	0.655654
Csde1	0.091627	5.68818	1.61571	0.203691	0.0966382	5.68818	1.79913	0.179817	-0.025962	0.0506627	0.225434	0.201784
Csf1r	0.180018	6.73637	9.04335	0.00263653	-0.0102118	6.73637	0.0291734	0.864379	-0.0569958	0.00255406	0.00400237	0.87062
Csgalnact1	-0.139923	5.30254	1.78982	0.180949	0.0153588	5.30254	0.0215984	0.88316	0.0539356	0.012185	0.201766	0.888744
Csgalnact2	0.0419475	4.76058	0.156874	0.692051	-0.0162976	4.76058	0.0237601	0.877497	-0.0089186	-0.00179616	0.705668	0.883384
Csmd1	-0.61764	7.48299	208.207	3.38055e-47	-0.00593026	7.48299	0.0191724	0.889873	0.215262	0.00413753	0	0.895172
Csmd2	-0.00495375	4.86191	0.00219144	0.962662	-0.0230805	4.86191	0.0472606	0.827901	0.0073855	0.00119758	0.964553	0.836261
Csmd3	0.0939903	6.38717	2.78808	0.0949681	-0.00128355	6.38717	0.000525153	0.981717	-0.0268306	0.00536904	0.111575	0.982544
Csnk1a1	0.146724	10.6526	75.8636	3.03957e-18	0.00379325	10.6526	0.0507221	0.821812	-0.045356	0.00768753	0	0.830427
Csnk1d	-0.0192997	7.22355	0.162198	0.687141	-0.00651392	7.22355	0.0184868	0.891848	0.012237	0.00372144	0.701021	0.89703
Csnk1g1	0.823	5.48243	94.8083	2.09747e-22	0.0157451	5.48243	0.0345589	0.852523	-0.271981	0.0115324	0	0.859266
Csnk1g3	8.27493	5.70667	2027.48	0	-0.415456	5.70667	1.54243	0.214256	-0.994867	-0.00150285	0	0.237379
Csnk2a1	-1.53861	4.90884	263.024	3.76124e-59	-0.0574013	4.90884	0.35846	0.549363	0.488793	-0.0106864	0	0.569398
Csnk2b	0.0238381	8.0493	0.304763	0.580912	0.0537685	8.0493	1.55063	0.213042	-0.00285401	0.0252235	0.59908	0.236069
Cspp1	-0.483823	6.23235	52.6215	4.04429e-13	-0.0195167	6.23235	0.08564	0.769795	0.170423	-0.00108477	0	0.780976
Csrnp1	-0.144048	5.03021	3.16953	0.0750238	-0.0707352	5.03021	0.76416	0.38203	0.0528806	-0.01467	0.0894394	0.406564
Csrnp2	0.138647	6.34008	4.73134	0.0296178	-0.114236	6.34008	3.21166	0.0731155	-0.0429844	-0.0330965	0.0376897	0.086712
Csrp1	0.051109	10.7431	9.92834	0.00162753	-0.0193156	10.7431	1.41809	0.233718	-0.0124631	-0.000385158	0.00249963	0.257222
Csrp2	-0.219117	5.1709	5.22334	0.0222857	0.00658857	5.1709	0.00479717	0.944781	0.0807743	0.0089238	0.0288656	0.947265
Csrp2bp	0.223171	5.95462	9.50733	0.00204653	0.0144493	5.95462	0.0399243	0.841629	-0.0726168	0.0121142	0.0031593	0.84904
Cst3	0.609704	11.403	1756.5	0	-0.0496925	11.403	11.7097	0.000621767	-0.203129	-0.0105184	0	0.00090815
Cstf3	-0.350491	5.9377	22.7825	1.81408e-06	0.00142048	5.9377	0.000367198	0.984712	0.125841	0.00841065	0	0.985274
CT030702.1	-0.0801455	6.05326	1.70209	0.192015	-0.136348	6.05326	4.92684	0.0264426	0.0334116	-0.0415595	0.213193	0.0336637
CT033755.1	0.602285	3.87974	21.7457	3.11286e-06	0.0206379	3.87974	0.0241903	0.876402	-0.204702	0.0178755	0	0.882251
CT485613.1	0.0455932	3.76328	0.156139	0.692736	-0.0698284	3.76328	0.365989	0.545199	-0.0118911	-0.0204304	0.706203	0.565419
Ctage5	-0.0711419	7.00969	1.52535	0.216812	-0.143876	7.00969	6.2373	0.0125087	0.0300691	-0.0427649	0.239314	0.0167963
Ctc1	0.0139565	7.38247	0.0722691	0.788061	0.0394956	7.38247	0.578697	0.446824	0.000654215	0.0198538	0.797784	0.470229
Ctdnep1	-0.00466845	6.24438	0.0044614	0.946746	0.00836669	6.24438	0.0143334	0.904703	0.00658532	0.00895432	0.949265	0.908934
Ctdp1	0.0496487	6.71911	0.937789	0.332847	-0.00153666	6.71911	0.000898968	0.976081	-0.0117499	0.00563799	0.355684	0.977296
Ctdsp1	0.12637	5.64561	1.87128	0.171328	-0.0822956	5.64561	0.793697	0.372985	-0.0383291	-0.0228578	0.191815	0.397781
Ctdsp2	0.271699	7.20303	25.9468	3.50958e-07	0.071734	7.20303	1.80972	0.178542	-0.087844	0.0311766	0	0.200518
Ctdspl2	0.0783773	6.48447	1.86537	0.172006	0.0227814	6.48447	0.157601	0.691375	-0.0207559	0.0128943	0.192395	0.706073
Ctgf	0.353113	4.60486	12.1364	0.000494469	0.119138	4.60486	1.38007	0.240089	-0.116534	0.0518433	0.000807573	0.263917
Cthrc1	2.61269	3.88927	301.219	1.7871e-67	-0.461679	3.88927	8.75463	0.00308817	-0.707847	-0.0797968	0	0.00451117
Ctif	0.0980475	7.89513	6.9536	0.00836509	-0.00375184	7.89513	0.0101778	0.919642	-0.0289172	0.00484048	0.0115515	0.923218
Ctla2a	-0.579435	4.73941	25.8323	3.72403e-07	0.0400595	4.73941	0.123187	0.725603	0.200144	0.014017	0	0.739175
Ctnna1	0.066319	6.3084	1.3812	0.239897	-0.0467426	6.3084	0.68622	0.407453	-0.0177629	-0.0105219	0.262985	0.431386
Ctnna3	-0.195031	4.07356	1.4355	0.230869	0.166818	4.07356	1.05428	0.304524	0.0629823	0.0665387	0.253868	0.329771
Ctnnbip1	0.0503039	6.60763	0.862321	0.35309	0.0115306	6.60763	0.0452764	0.831497	-0.012047	0.00813858	0.375865	0.839544
Ctnnd1	0.0343175	6.26929	0.245196	0.620478	0.126405	6.26929	3.32867	0.0680819	-0.00612577	0.0514813	0.637003	0.0811152
Ctnnd2	-0.0470863	8.10465	1.63731	0.200696	-0.0939727	8.10465	6.52103	0.0106606	0.0213832	-0.026398	0.222296	0.0144505
Ctps	0.118073	4.22324	1.10165	0.293905	-0.123215	4.22324	1.1992	0.273482	-0.0390791	-0.0386437	0.317252	0.298204
Ctr9	-0.0712501	7.39684	2.66751	0.102416	-0.0870504	7.39684	3.9815	0.0460025	0.0300384	-0.0239326	0.119772	0.0561929
Ctsd	0.0340321	9.56774	2.77204	0.0959236	-0.0444678	9.56774	4.73279	0.0295928	-0.00634811	-0.00935947	0.11256	0.0373081
Ctsf	-0.135798	8.2383	17.3565	3.09833e-05	-0.0253219	8.2383	0.603447	0.437266	0.052381	-0.00266915	4.73303e-05	0.460751
Ctsh	-0.0128625	5.41301	0.0193479	0.889374	0.117708	5.41301	1.61301	0.204069	0.0109497	0.0420538	0.894817	0.226759
Ctso	0.464323	4.95487	25.3609	4.75467e-07	-0.0111914	4.95487	0.0145254	0.90407	-0.153978	0.00456843	0	0.908321
Cttn	-0.241417	8.46484	40.9724	1.54395e-10	-0.00601808	8.46484	0.025457	0.873234	0.0885213	0.00402326	0	0.879116
Cttnbp2	0.0228059	6.47106	0.128294	0.720207	0.0246223	6.47106	0.149503	0.699011	-0.00339276	0.0155256	0.732687	0.713536
Ctu1	-0.0917078	4.34939	0.69866	0.403234	-0.11858	4.34939	1.16665	0.280092	0.0381506	-0.0311119	0.425484	0.304703
Ctu2	-0.0575317	6.46013	0.704184	0.401381	0.0127413	6.46013	0.034539	0.852565	0.0243582	0.0103882	0.423674	0.859296
Cuedc1	0.603881	6.11419	59.6053	1.15923e-14	-0.0543048	6.11419	0.482535	0.487276	-0.197876	-0.0127318	0	0.509522
Cul4a	-0.206322	8.4122	45.264	1.72185e-11	0.0012485	8.4122	0.00165915	0.967509	0.0765508	0.00684619	0	0.969152
Cul7	-0.118476	3.55466	0.660308	0.416451	0.00596603	3.55466	0.00170369	0.967076	0.0574822	0.00881625	0.438675	0.968679
Cul9	-0.0700086	5.63195	0.692774	0.405222	-0.123507	5.63195	2.1563	0.141986	0.0294278	-0.0370281	0.427475	0.16176
Cuta	-0.0889017	6.85034	2.11863	0.145517	0.0609423	6.85034	0.995962	0.318289	0.034756	0.0276116	0.165171	0.343724
Cux1	-0.141277	6.51255	4.74922	0.0293115	-0.036421	6.51255	0.315697	0.574205	0.0545107	-0.00727222	0.037314	0.593152
Cux2	0.00497149	5.00336	0.00268872	0.958646	-0.0393097	5.00336	0.168176	0.681738	0.00370382	-0.00919071	0.960742	0.696838
Cwc27	0.154069	4.34089	1.01178	0.314476	0.0865784	4.34089	0.322711	0.569983	-0.041358	0.0429096	0.337406	0.588978
Cx3cr1	0.168168	7.16172	13.1558	0.000286635	-0.0321701	7.16172	0.48137	0.487802	-0.0532774	-0.00484647	0.000455554	0.510132
Cxcl14	0.239883	5.8784	11.0153	0.000903619	0.116206	5.8784	2.58499	0.107881	-0.077514	0.0477254	0.00140512	0.125416
Cxcr6	0.746473	3.97592	24.9875	5.7702e-07	0.134363	3.97592	0.80675	0.369083	-0.245205	0.0466081	0	0.393995
Cxcr7	0.173461	3.33751	0.968692	0.325007	0.0437861	3.33751	0.0620966	0.803212	-0.0537085	0.0183949	0.347774	0.812829
Cxxc1	0.104665	4.38008	0.471158	0.492455	0.135089	4.38008	0.786847	0.375055	-0.0234451	0.0478854	0.513099	0.399766
Cxxc5	-0.252629	5.91526	11.5052	0.000694023	-0.157942	5.91526	4.49534	0.0339873	0.0943525	-0.0461622	0.00108564	0.0421949
Cyb5b	0.0963206	6.45594	2.23618	0.134814	0.0950888	6.45594	2.17917	0.13989	-0.0295482	0.0397768	0.154101	0.159494
Cyb5d1	-0.206904	5.59531	8.55942	0.00343739	-0.0732338	5.59531	1.07204	0.300485	0.0745748	-0.020616	0.00514421	0.325691
Cyb5r2	1.76899	3.58814	85.4356	2.39374e-20	0.376358	3.58814	3.86179	0.0493975	-0.519883	0.0892194	0	0.0599704
Cyb5r3	1.47617	4.65363	133.697	6.36364e-31	0.0239327	4.65363	0.0349142	0.851775	-0.457273	0.0105207	0	0.858524
Cyb5r4	-0.0620506	8.04779	1.97496	0.159922	-0.0290103	8.04779	0.431758	0.511127	0.0263524	-0.00414262	0.179956	0.532753
Cyba	-0.238999	4.98901	4.08888	0.0431662	-0.00963844	4.98901	0.00661868	0.935159	0.0817535	0.00507541	0.0535867	0.938187
Cyfip1	-0.0336281	8.62958	1.34423	0.24629	-0.0236571	8.62958	0.665266	0.414707	0.0166862	-0.00218405	0.269469	0.438687
Cyfip2	0.0363537	9.77405	3.20818	0.073271	-0.0349336	9.77405	2.96248	0.0852172	-0.00719246	-0.00608872	0.0876616	0.100509
Cygb	-0.139238	7.04363	11.2802	0.000783385	-0.0515259	7.04363	1.5447	0.21392	0.0548145	-0.0126267	0.00124242	0.23703
Cyhr1	0.140886	7.12981	8.54062	0.00347307	-0.0664975	7.12981	1.90299	0.167743	-0.0430559	-0.0175633	0.00518858	0.189232
Cyp20a1	-0.0276983	4.49796	0.0523805	0.818972	-0.0513102	4.49796	0.180345	0.671077	0.0132794	-0.0138524	0.827378	0.686691
Cyp27a1	0.42012	4.55429	12.1354	0.000494745	0.129029	4.55429	1.1418	0.285273	-0.140234	0.0465954	0.000807573	0.310004
Cyp2d22	-0.569245	5.43295	8.68077	0.00321585	-0.0130634	5.43295	0.00449928	0.946521	0.182282	-0.00308501	0.00484248	0.948898
Cyp2j12	1.13052	4.88837	74.9296	4.87793e-18	-0.277129	4.88837	4.52377	0.0334271	-0.352902	-0.0710829	0	0.0415353
Cyp2j6	0.033746	5.44627	0.122479	0.726362	0.0584207	5.44627	0.367675	0.544274	-0.00540905	0.0286237	0.738837	0.564482
Cyp2j9	0.23613	7.50039	26.2481	3.00249e-07	-0.0493475	7.50039	1.14647	0.284289	-0.0760995	-0.0101994	0	0.309008
Cyp46a1	0.143383	7.05746	5.73597	0.0166209	-0.0308618	7.05746	0.265811	0.606156	-0.0437787	-0.0049036	0.0220589	0.624269
Cyp4f15	0.888157	5.68603	110.029	9.65489e-26	-0.0869172	5.68603	1.05605	0.304117	-0.291099	-0.0199424	0	0.329262
Cyp4f16	0.768928	4.39735	24.0521	9.3762e-07	0.0891152	4.39735	0.322191	0.570294	-0.246594	0.0356079	0	0.589268
Cyp4f17	-0.484477	4.34419	12.2783	0.000458264	-0.0503859	4.34419	0.132754	0.715594	0.167815	-0.00952357	0.000733619	0.729567
Cyp51	-0.157587	8.88245	27.9085	1.27193e-07	-0.0282998	8.88245	0.900092	0.342757	0.0600428	-0.00365573	0	0.367886
Cyp7b1	0.183501	5.51655	4.14287	0.0418102	-0.0216552	5.51655	0.0577708	0.810055	-0.0557043	-0.002215	0.0520367	0.819184
D030028A08Rik	1.5612	5.67251	257.315	6.60519e-58	-0.0330771	5.67251	0.11658	0.732774	-0.483196	-0.00478728	0	0.74618
D030047H15Rik	0.2229	4.52741	6.33807	0.0118174	-0.150555	4.52741	2.88959	0.0891535	-0.0696843	-0.0444189	0.0159976	0.105035
D030056L22Rik	0.0473529	4.80342	0.257437	0.611887	0.0301089	4.80342	0.103457	0.74772	-0.029099	0.00555631	0.628727	0.76008
D10Bwg1379e	0.0997455	6.88804	2.87766	0.0898162	-0.0570245	6.88804	0.940626	0.332117	-0.029414	-0.014069	0.106032	0.35727
D10Wsu102e	0.141782	4.96048	1.99499	0.15782	-0.0306816	4.96048	0.0935166	0.759753	-0.0407959	-0.00494588	0.177734	0.771442
D11Wsu47e	-0.421835	5.06764	18.0081	2.19967e-05	-0.0311444	5.06764	0.0983721	0.753792	0.149536	-0.00760831	2.95814e-05	0.765718
D130040H23Rik	-0.514163	4.59625	17.3839	3.0541e-05	0.0109236	4.59625	0.00776063	0.929802	0.175631	0.0135023	4.43721e-05	0.933016
D130043K22Rik	-0.290586	8.13763	50.7419	1.05344e-12	-0.0252758	8.13763	0.384037	0.53545	0.105365	-0.0022755	0	0.556072
D15Ertd621e	-0.0972629	4.42409	0.981231	0.321895	-0.0351407	4.42409	0.127809	0.720714	0.038501	-0.00123773	0.344641	0.734465
D17H6S53E	0.122024	5.82712	2.94035	0.0863919	-0.0796823	5.82712	1.25373	0.262842	-0.0342619	-0.0185309	0.102006	0.287283
D17Wsu92e	0.0652497	10.0038	12.0125	0.000528454	-0.0247432	10.0038	1.7274	0.188744	-0.0175902	-0.00229577	0.000851945	0.210954
D1Ertd622e	-0.0933498	6.6972	2.69266	0.100811	-0.00399229	6.6972	0.00491554	0.944105	0.0370577	0.00556316	0.118039	0.946629
D330041H03Rik	-2.45821	5.09155	507.799	1.91022e-112	-0.170107	5.09155	2.36966	0.123714	0.690181	-0.02698	0	0.142239
D430019H16Rik	0.0269415	3.83297	0.0513127	0.820795	0.168341	3.83297	1.99984	0.157316	-0.00363879	0.0616326	0.829185	0.178231
D430041D05Rik	-0.161203	8.11478	22.206	2.44905e-06	-0.0287	8.11478	0.703948	0.40146	0.0605908	-0.00394382	0	0.425585
D4Wsu53e	-0.396128	6.22178	49.6747	1.81473e-12	-0.0157663	6.22178	0.0788164	0.778908	0.144862	-0.000610939	0	0.789602
D5Ertd579e	-9.38723	5.38557	2057.07	0	0.537671	5.38557	2.79522	0.0945458	0.998874	0.00112613	0	0.11083
D630023F18Rik	0.440445	3.52297	6.04335	0.0139587	-0.0611828	3.52297	0.114401	0.735189	-0.138984	-0.0086807	0.0187191	0.748466
D630037F22Rik	0.383449	6.72977	47.6094	5.20176e-12	-0.0731872	6.72977	1.73491	0.187785	-0.125776	-0.0181256	0	0.210019
D630044L22Rik	-0.0179633	3.29909	0.0130829	0.908936	-0.161197	3.29909	1.02014	0.312486	0.0183209	-0.0399901	0.913557	0.337767
D630045J12Rik	0.156588	7.77356	15.4569	8.44076e-05	-0.00504055	7.77356	0.0160207	0.899278	-0.0491695	0.00434967	0.000112409	0.90389
D6Wsu163e	-0.230996	5.04288	5.99531	0.014344	-0.197648	5.04288	4.38417	0.0362742	0.0905324	-0.0572164	0.0191895	0.0448247
D7Ertd443e	-0.346875	4.35194	6.72606	0.00950144	-0.00645227	4.35194	0.00231938	0.961589	0.120311	-0.00012672	0.0130898	0.963517
D8Ertd738e	0.553068	7.89492	94.6861	2.23102e-22	-0.0300862	7.89492	0.281331	0.59583	-0.18293	-0.00379296	0	0.614465
D930015E06Rik	0.199962	4.48934	2.87001	0.090244	-0.0262594	4.48934	0.0492612	0.824354	-0.0631646	0.000497595	0.106517	0.832758
Daam1	0.10867	7.31604	5.58645	0.0180999	0.0363837	7.31604	0.626207	0.42875	-0.0327122	0.0188595	0.0237509	0.452377
Dab1	-0.0837204	5.56168	1.59459	0.206672	-0.0264522	5.56168	0.159087	0.689999	0.0347962	-0.000650595	0.228434	0.704748
Dact1	-0.0111161	3.79233	0.00749697	0.931001	0.0196131	3.79233	0.0234933	0.878181	0.00391193	0.00629673	0.934036	0.884032
Dap	0.230222	4.0694	3.20553	0.0733896	0.000299038	4.0694	8.85294e-06	0.997626	-0.0727971	0.0075716	0.0877562	0.997846
Dap3	0.672681	4.2555	7.38403	0.00658057	0.206348	4.2555	0.694201	0.404739	-0.203855	0.0653643	0.00935365	0.428771
Dapk1	0.0357933	8.76396	1.52915	0.216241	0.0547689	8.76396	3.58016	0.0584735	-0.00749522	0.024968	0.238719	0.0701819
Darc	-0.503467	4.25015	21.9446	2.80637e-06	-0.111533	4.25015	1.06906	0.301158	0.183762	-0.0247959	0	0.326366
Dars	0.0887779	6.53755	1.88198	0.170109	-0.0648372	6.53755	1.00386	0.316379	-0.0256211	-0.0165847	0.19043	0.341668
Dars2	0.113848	5.51447	1.45955	0.227001	0.0388255	5.51447	0.169653	0.68042	-0.0358101	0.018848	0.24991	0.69569
Daxx	0.0816495	4.87555	0.729441	0.393064	0.0135538	4.87555	0.0203335	0.88661	-0.0197297	0.0167504	0.415575	0.892034
Dazap2	-0.00467544	6.38333	0.00427889	0.947845	0.0530929	6.38333	0.552939	0.457119	0.00578835	0.0227435	0.950327	0.480071
Dbc1	-0.0435958	6.52761	0.61702	0.432157	-0.0335498	6.52761	0.365359	0.545545	0.0215275	-0.00511297	0.453962	0.565727
Dbf4	0.0978695	3.67438	0.387479	0.533627	-0.329487	3.67438	4.43754	0.0351568	-0.0159175	-0.104339	0.553143	0.0434699
Dbndd2	-1.29689	7.33533	802.338	1.67405e-176	-0.0854455	7.33533	3.48126	0.0620676	0.424212	-0.018782	0	0.0742642
Dbnl	-0.396888	5.99304	36.5718	1.47143e-09	0.0359948	5.99304	0.300708	0.583439	0.140995	0.0178732	0	0.602337
Dbt	0.236934	5.0177	3.32502	0.0682333	-0.0842204	5.0177	0.421109	0.516384	-0.0713325	-0.0248381	0.0821299	0.537533
Dbx2	-0.148343	5.69032	3.35938	0.0668231	-0.044607	5.69032	0.303991	0.581391	0.0558422	-0.0106457	0.0804733	0.600346
Dcaf11	0.0920606	7.61215	5.15213	0.0232179	-0.0579092	7.61215	2.03868	0.153342	-0.0263028	-0.0137491	0.0300784	0.173791
Dcaf12	-0.0812736	4.8459	0.700279	0.40269	-0.0838281	4.8459	0.745977	0.387753	0.0296887	-0.0254478	0.424946	0.412004
Dcaf13	-0.0432793	4.33182	0.0753119	0.783754	-0.124031	4.33182	0.60373	0.437158	0.0300225	-0.0268235	0.793714	0.46066
Dcaf15	-0.066384	5.41057	0.430268	0.511858	0.0934986	5.41057	0.854874	0.355177	0.0267496	0.0395851	0.531948	0.380139
Dcaf4	0.0965568	5.74411	1.96099	0.161407	0.00186879	5.74411	0.000735334	0.978366	-0.0259369	0.00672741	0.181423	0.979358
Dcaf5	-0.0318278	6.77928	0.360602	0.548172	-0.00979397	6.77928	0.0341297	0.853431	0.0159529	0.0028979	0.567159	0.860172
Dcaf6	0.282488	3.5324	4.51203	0.0336573	-0.12123	3.5324	0.826087	0.363406	-0.0850873	-0.03213	0.0424878	0.388487
Dcaf7	-0.174463	5.94974	7.86335	0.00504469	0.0175301	5.94974	0.0795082	0.777965	0.0648681	0.0125991	0.00734507	0.788691
Dcbld1	0.153113	4.65444	1.54378	0.214056	-0.0805306	4.65444	0.427685	0.513127	-0.0405498	-0.0207782	0.236276	0.534471
Dcbld2	0.0637838	8.3936	3.29567	0.0694627	-0.0248568	8.3936	0.500512	0.479275	-0.0170231	-0.00237722	0.0835853	0.501695
Dcc	-0.0411772	5.27725	0.157851	0.691142	0.0700455	5.27725	0.457083	0.49899	0.017078	0.0278316	0.704774	0.52097
Dcdc2a	-0.901811	6.17372	137.333	1.01964e-31	0.00621654	6.17372	0.00651675	0.93566	0.304647	0.00911914	0	0.938622
Dcdc2b	-0.194058	4.66689	2.72548	0.0987581	-0.0965381	4.66689	0.675814	0.411032	0.0630327	-0.027983	0.115811	0.434953
Dcdc5	-0.501786	3.99954	11.0505	0.000886631	0.288125	3.99954	3.64625	0.0561957	0.171595	0.095704	0.00138737	0.0677503
Dchs1	0.383463	6.48008	37.5767	8.78882e-10	-0.042745	6.48008	0.466809	0.494459	-0.126135	-0.00830467	0	0.516435
Dck	-0.50491	5.85651	53.3288	2.82136e-13	0.00397806	5.85651	0.0033465	0.953869	0.178312	0.00759963	0	0.955968
Dclk1	-0.129549	9.43133	16.3152	5.36324e-05	-0.0482546	9.43133	2.26396	0.132415	0.0503093	-0.0106005	7.98698e-05	0.151489
Dclk2	8.04565	6.07549	1791.18	0	-0.162016	6.07549	0.373523	0.54109	-0.993428	-0.000944547	0	0.56142
Dclk3	-1.78976	3.85631	110.203	8.846e-26	0.130022	3.85631	0.58947	0.442624	0.538914	0.0280857	0	0.465961
Dclre1a	0.451811	4.19324	12.9448	0.000320813	0.159605	4.19324	1.61553	0.203716	-0.150205	0.0627666	0.000517675	0.226404
Dclre1b	-0.091538	4.40378	0.640803	0.42342	-0.0374796	4.40378	0.107732	0.742742	0.0357145	-0.00800346	0.44549	0.755518
Dclre1c	-0.481678	5.17664	24.7918	6.38675e-07	-0.0456757	5.17664	0.223097	0.636691	0.168062	-0.00904961	0	0.653785
Dcp2	0.113796	9.55248	24.7434	6.54943e-07	-0.000670062	9.55248	0.000858237	0.976629	-0.0341077	0.00609178	0	0.977764
Dcps	0.153207	5.53705	3.3029	0.0691576	-0.14863	5.53705	3.10815	0.0779014	-0.0489758	-0.0451621	0.0832066	0.0921609
Dctn1	0.437557	8.19046	132.478	1.17587e-30	0.0457414	8.19046	1.44906	0.22868	-0.14561	0.0212823	0	0.252356
Dctn3	-0.419755	7.49581	62.7084	2.39685e-15	0.0152228	7.49581	0.0825885	0.77382	0.148642	0.0118484	0	0.784798
Dctn4	-0.170274	7.65828	9.06449	0.00260622	-0.0672907	7.65828	1.41583	0.234091	0.0644718	-0.0170149	0.00395799	0.25761
Dcun1d2	0.0421895	7.82206	1.26484	0.260736	-0.00466715	7.82206	0.015473	0.901006	-0.00927945	0.00489732	0.283934	0.905493
Dcun1d4	0.129056	5.4401	2.25852	0.132881	-0.0487443	5.4401	0.322057	0.570374	-0.0374306	-0.00845376	0.152028	0.589342
Ddah1	0.101214	9.60428	22.3856	2.23039e-06	-0.0181688	9.60428	0.721384	0.39569	-0.029913	-4.59839e-05	0	0.419657
Ddc	0.060899	7.73261	1.1698	0.279442	-0.431167	7.73261	58.5362	1.99582e-14	-0.0155803	-0.141758	0.302553	0
Ddhd1	0.685691	5.8038	60.1586	8.75116e-15	-0.0772108	5.8038	0.764506	0.381922	-0.220484	-0.0173354	0	0.406455
Ddit4	-0.00381684	4.50649	0.00110007	0.973541	0.0547095	4.50649	0.233848	0.628685	0.00246504	0.0216022	0.974764	0.64589
Ddr1	0.0579617	7.81802	2.70637	0.099948	-0.100043	7.81802	8.06307	0.00451766	-0.0149011	-0.0290389	0.117131	0.0065227
Ddx17	7.16919	3.84298	703.264	5.83406e-155	-0.648686	3.84298	2.47066	0.11599	-0.991811	-0.00527335	0	0.134096
Ddx18	-0.0743808	6.47736	1.68405	0.194388	0.0853655	6.47736	2.21803	0.136407	0.0320212	0.0362748	0.215734	0.155832
Ddx21	0.462964	4.0211	11.5115	0.000691658	0.126715	4.0211	0.86057	0.353579	-0.152804	0.0440732	0.00108564	0.378521
Ddx24	0.0300242	7.3242	0.442991	0.505682	0.0309537	7.3242	0.470848	0.492597	-0.00564239	0.0171664	0.525964	0.51461
Ddx25	0.0410575	7.45973	0.851851	0.356029	0.0169569	7.45973	0.145298	0.70307	-0.00892383	0.0119777	0.378775	0.717521
Ddx39	-0.275653	4.79862	6.89784	0.00863001	0.0830095	4.79862	0.626687	0.428573	0.108769	0.0405066	0.0119006	0.452182
Ddx39b	2.23888	8.25008	1198.82	1.09924e-262	0.0745866	8.25008	1.40736	0.235495	-0.643066	0.0191747	0	0.25903
Ddx42	-0.152585	5.58695	3.11971	0.0773504	-0.11939	5.58695	1.91059	0.166898	0.0584014	-0.0374078	0.0919627	0.188271
Ddx47	0.251434	6.95296	23.1993	1.46054e-06	0.0478877	6.95296	0.841735	0.358901	-0.0809568	0.023124	0	0.38397
Ddx5	-0.063747	6.44855	1.30567	0.25318	-0.0623486	6.44855	1.24928	0.26369	0.0238085	-0.016674	0.276418	0.288212
Ddx55	-0.116028	5.8772	2.00076	0.157221	-0.0122535	5.8772	0.0223673	0.881114	0.0457447	0.00088503	0.177157	0.886857
Ddx59	-0.433029	4.20185	12.3784	0.000434318	0.0356974	4.20185	0.0835532	0.772539	0.150803	0.0214289	0.000704038	0.783553
Decr1	-0.274892	6.57573	21.6161	3.33052e-06	0.0476641	6.57573	0.650154	0.420058	0.100445	0.0227027	0	0.44392
Decr2	-1.0892	7.38665	657.59	4.99458e-145	0.0311748	7.38665	0.537095	0.463639	0.365027	0.0146937	0	0.486564
Dedd	0.0978376	5.96955	2.17963	0.139848	0.0644006	5.96955	0.944285	0.331178	-0.0279118	0.027448	0.159414	0.356279
Dedd2	-0.0866105	5.67575	1.48011	0.223757	-0.110301	5.67575	2.40015	0.121324	0.0351599	-0.0308297	0.246455	0.139675
Def8	-0.0364439	7.73627	0.615106	0.432872	0.0223179	7.73627	0.23073	0.630983	0.017713	0.0141505	0.454578	0.648188
Degs1	-0.0433883	8.04392	1.8028	0.179374	0.0272146	8.04392	0.70927	0.399686	0.0200032	0.0156164	0.200133	0.423745
Degs2	0.0611548	5.56125	0.911058	0.339834	-0.0191865	5.56125	0.0895942	0.764694	-0.0152824	0.00270178	0.36271	0.776131
Dek	0.0627216	6.14842	0.880721	0.348004	0.0412716	6.14842	0.381316	0.5369	-0.0159231	0.0197899	0.3708	0.557412
Dennd1b	-0.720307	4.13267	16.1434	5.87227e-05	0.193717	4.13267	1.16616	0.280193	0.234332	0.0700681	9.76187e-05	0.304825
Dennd4a	0.00303739	5.85865	0.00156473	0.968447	-0.0424463	5.85865	0.305913	0.580199	0.00371374	-0.00903658	0.970001	0.599213
Dennd4c	-0.376311	5.17833	19.0393	1.28054e-05	-0.0542538	5.17833	0.395399	0.529475	0.136097	-0.0147178	1.47907e-05	0.550194
Dennd5a	-0.0304909	8.25331	0.575265	0.448174	-0.0167428	8.25331	0.17344	0.677072	0.0160097	0.000324012	0.469534	0.692483
Depdc5	0.0526182	6.6947	0.676574	0.410769	-0.118164	6.6947	3.41156	0.0647413	-0.0129019	-0.0346959	0.433022	0.0774619
Deptor	-0.708332	4.70925	46.4575	9.36254e-12	-0.0484203	4.70925	0.216265	0.6419	0.24144	-0.00667435	0	0.658725
Dera	0.24308	3.88701	2.88304	0.0895171	-0.373549	3.88701	6.78857	0.00917432	-0.081522	-0.119196	0.105691	0.0125691
Derl1	-0.0594912	5.06604	0.523604	0.469308	-0.0309262	5.06604	0.141414	0.70688	0.0261655	-0.00294213	0.490336	0.721133
Derl2	0.223234	6.61593	17.7253	2.55213e-05	-0.0858139	6.61593	2.61904	0.105588	-0.0724907	-0.0240799	3.84558e-05	0.122926
Desi1	-0.12879	5.70451	3.79799	0.0513142	-0.0542055	5.70451	0.672319	0.412244	0.0492062	-0.0117767	0.0628871	0.436285
Dffa	-0.140337	5.93743	3.73172	0.0533885	-0.0208726	5.93743	0.0826323	0.773761	0.053376	-0.00268243	0.0652004	0.784721
Dgka	-0.438205	5.20466	15.2682	9.32736e-05	-0.0872853	5.20466	0.605144	0.436622	0.152679	-0.0262099	0.000124242	0.460142
Dgkb	0.088866	6.82021	1.30705	0.25293	0.0135693	6.82021	0.0304139	0.861555	-0.0243046	0.00956648	0.276169	0.867993
Dgkd	-0.0676046	5.41263	0.729354	0.393093	-0.0272668	5.41263	0.118428	0.730745	0.0295852	-0.000178631	0.415607	0.74413
Dgke	-0.00819558	8.89162	0.0759865	0.782812	-0.010288	8.89162	0.119745	0.729311	0.00788473	0.00269808	0.792744	0.742683
Dgkg	-0.0530997	6.68475	0.867229	0.351724	-0.0857607	6.68475	2.26199	0.132583	0.0247926	-0.0244236	0.374554	0.151655
Dgkh	0.0766449	4.67077	0.557088	0.455436	0.0164341	4.67077	0.0257581	0.872493	-0.0163934	0.014363	0.476882	0.878414
Dgkq	-0.0222238	7.68272	0.33017	0.565559	-0.00332924	7.68272	0.00740717	0.931415	0.0122654	0.0054504	0.58436	0.934563
Dgkz	0.00508784	6.82319	0.00718341	0.932456	-0.0729937	6.82319	1.48361	0.223211	0.00464976	-0.0196548	0.935385	0.246679
Dhcr24	-0.180348	7.43849	16.3937	5.14552e-05	-0.00308086	7.43849	0.00477629	0.944902	0.0670715	0.00507367	7.69117e-05	0.947381
Dhcr7	0.26256	6.41171	14.2043	0.000163997	-0.00507814	6.41171	0.00536423	0.941614	-0.0846435	0.0030469	0.000236651	0.944357
Dhdds	-0.131475	5.32401	2.3971	0.121561	0.0650884	5.32401	0.587375	0.443436	0.0502771	0.0296255	0.139997	0.466783
Dhps	-0.00721078	5.0642	0.00479519	0.944793	-0.209747	5.0642	4.09066	0.0431208	0.0067577	-0.0663417	0.947215	0.0528768
Dhrs1	-0.0508051	5.21098	0.398161	0.528041	-0.184389	5.21098	5.24549	0.0220037	0.0213113	-0.0544752	0.547786	0.0282769
Dhrs11	0.408661	3.38185	5.08138	0.0241841	0.0246436	3.38185	0.0167891	0.896905	-0.129151	0.0185936	0.0311818	0.901686
Dhrs3	0.0489001	5.70788	0.280131	0.596615	-0.0928838	5.70788	1.00984	0.314942	-0.0117005	-0.0240538	0.61401	0.34016
Dhrs7	0.437184	5.11741	26.3855	2.79626e-07	-0.0116284	5.11741	0.0185773	0.891585	-0.145256	0.00121306	0	0.896793
Dhtkd1	-0.248027	4.3235	3.71378	0.0539651	-0.157855	4.3235	1.50287	0.22023	0.0936215	-0.0454364	0.065795	0.243633
Dhx33	0.0997722	6.80238	3.6729	0.055304	-0.0381214	6.80238	0.536119	0.464046	-0.029536	-0.00646696	0.0672977	0.486925
Dhx34	0.00566058	3.40792	0.0010327	0.974364	-0.196124	3.40792	1.38317	0.239561	0.00442162	-0.062584	0.975589	0.263375
Dhx35	-0.0157055	4.93271	0.0143758	0.904563	-0.239768	4.93271	3.30272	0.0691653	0.0143604	-0.078434	0.909336	0.0822511
Dhx37	-0.214926	3.77171	1.79298	0.180564	-0.0264107	3.77171	0.0270488	0.869365	0.0754645	-0.00805678	0.201387	0.875427
Dhx8	0.182743	5.63166	4.22669	0.0397929	0.0768932	5.63166	0.748296	0.387016	-0.0577904	0.0327594	0.0496258	0.411285
Diablo	0.340066	4.77645	15.7409	7.26357e-05	-0.20971	4.77645	5.97808	0.0144848	-0.111794	-0.0622875	0.000100577	0.0191421
Diap1	0.235806	5.82138	14.1335	0.000170288	-0.0180286	5.82138	0.0826498	0.773738	-0.0775978	-3.88909e-05	0.000248484	0.784698
Diap3	0.361106	3.92394	10.7612	0.00103648	-0.145599	3.92394	1.74269	0.186799	-0.118751	-0.0322315	0.00159444	0.209016
Dicer1	-0.134492	5.58414	2.40777	0.120735	0.00101852	5.58414	0.000137602	0.990641	0.0489718	0.00509274	0.139074	0.991075
Diexf	0.00457986	5.09664	0.00262342	0.959151	0.0941916	5.09664	1.11122	0.291817	0.00534644	0.0374884	0.961157	0.316782
Dip2b	-0.0898635	8.373	5.02568	0.0249741	-0.0507571	8.373	1.60349	0.205409	0.0362385	-0.0115285	0.0320574	0.228233
Dip2c	-0.0706977	8.63991	4.74773	0.029337	0.00125562	8.63991	0.00149757	0.969131	0.0294226	0.00681624	0.0373436	0.970646
Diras2	0.358911	6.2884	35.2361	2.92053e-09	-0.00113441	6.2884	0.000353862	0.984992	-0.118843	0.0042717	0	0.985558
Dirc2	-0.168728	7.94658	22.1056	2.58055e-06	-0.066312	7.94658	3.41449	0.0646263	0.0635394	-0.0168193	0	0.0773525
Dis3l	-0.293245	7.06687	25.6784	4.03309e-07	-0.0319859	7.06687	0.305538	0.580431	0.105017	-0.00432889	0	0.599447
Dis3l2	0.149345	5.66556	3.50081	0.0613388	-0.126381	5.66556	2.50803	0.113267	-0.0454444	-0.0391184	0.0741932	0.131185
Disp1	-0.0294849	3.80191	0.0399939	0.841492	-0.199738	3.80191	1.84192	0.174726	0.00781295	-0.0521427	0.849203	0.196421
Disp2	0.0237063	10.882	2.49747	0.114029	-0.0196068	10.882	1.7084	0.191193	-0.00294128	-0.000511018	0.131918	0.213531
Dixdc1	0.304362	8.30634	69.156	9.09746e-17	0.0506999	8.30634	1.91999	0.165857	-0.0995496	0.0234319	0	0.187185
Dkk3	0.103149	8.10339	10.2963	0.00133296	-0.00699908	8.10339	0.0473997	0.827651	-0.0309727	0.00381455	0.00202337	0.835965
Dlat	0.201369	7.50137	19.6751	9.17879e-06	0.0422315	7.50137	0.865484	0.352209	-0.0643311	0.0199216	1.18326e-05	0.377252
Dlc1	-5.00633	4.27036	286.561	2.79134e-64	0.088722	4.27036	0.0773305	0.780948	0.931661	0.00914867	0	0.791584
Dld	0.622244	6.06336	74.8481	5.08369e-18	0.084743	6.06336	1.39008	0.238392	-0.20722	0.0354504	0	0.262219
Dlec1	-0.0357917	4.84107	0.126738	0.721838	0.0579719	4.84107	0.331042	0.565046	0.0224144	0.0248754	0.734229	0.584319
Dlg1	0.16219	5.40028	3.46173	0.0628047	-0.0476031	5.40028	0.298427	0.58487	-0.050716	-0.0120389	0.075832	0.603754
Dlg2	0.0677568	9.00688	6.6612	0.00985346	-0.0782325	9.00688	8.88006	0.00288303	-0.0185973	-0.0210936	0.0135217	0.00422127
Dlg4	-0.108179	9.96203	41.9929	9.16064e-11	0.00959149	9.96203	0.330089	0.565606	0.0427062	0.0094528	0	0.584819
Dlgap1	0.0493256	8.50338	1.74336	0.186713	-0.0532141	8.50338	2.02902	0.15432	-0.0122071	-0.0120658	0.207913	0.174841
Dlgap3	0.00870665	6.49652	0.0219054	0.882339	0.0513274	6.49652	0.762257	0.382623	0.00312662	0.0258157	0.888164	0.407111
Dlgap4	-0.0213158	8.70025	0.481614	0.487692	0.0306507	8.70025	0.995875	0.318311	0.0129429	0.0175037	0.508428	0.343748
Dlx6as1	1.06563	5.16338	150.665	1.24078e-34	-0.170688	5.16338	3.82992	0.0503454	-0.340416	-0.0441226	0	0.0610146
Dmkn	-0.443421	4.15064	7.34242	0.00673462	-0.0381791	4.15064	0.0555657	0.813647	0.148278	-0.0161094	0.00954593	0.822585
Dmtf1	-0.222224	8.17839	30.0272	4.26033e-08	-0.0423682	8.17839	1.09183	0.296065	0.0818549	-0.0082875	0	0.321109
Dmxl1	0.0500434	6.49582	0.523339	0.469421	0.00627646	6.49582	0.00824044	0.92767	-0.0119007	0.00900608	0.490463	0.931049
Dmxl2	-0.000919275	9.34221	0.00138364	0.970328	0.0192281	9.34221	0.605493	0.43649	0.00545779	0.0127753	0.971747	0.459994
Dna2	-0.192995	4.00175	2.16314	0.141356	0.00785816	4.00175	0.00358243	0.952272	0.0740805	0.0167345	0.161009	0.954427
Dnaaf2	-0.0977054	3.90122	0.595572	0.440272	0.188463	3.90122	2.22037	0.1362	0.0324063	0.0657155	0.461967	0.155586
Dnahc11	-0.0781725	4.08034	0.254297	0.614066	0.112473	4.08034	0.525513	0.468499	0.027479	0.0325269	0.630859	0.491398
Dnahc2	-0.140351	4.65081	0.538677	0.462981	0.0813971	4.65081	0.179781	0.671561	0.054833	0.0300377	0.484168	0.687191
Dnahc5	0.627478	5.97024	52.7637	3.76187e-13	0.0359114	5.97024	0.173157	0.677321	-0.202279	0.0197408	0	0.692717
Dnahc6	0.342662	4.85148	10.8252	0.00100126	0.00839926	4.85148	0.00659022	0.935299	-0.112051	0.0110248	0.00154119	0.938349
Dnahc7a	0.697951	3.70917	10.0579	0.00151696	0.223244	3.70917	1.02356	0.311675	-0.217281	0.0809856	0.00234285	0.336918
Dnahc9	-0.144061	5.20552	2.18649	0.139226	-0.0810169	5.20552	0.691013	0.40582	0.0566246	-0.0205925	0.15879	0.429821
Dnaic1	0.41956	4.32	11.7716	0.000601426	-0.0894337	4.32	0.536961	0.463695	-0.140805	-0.0294598	0.000961396	0.486594
Dnaja1	9.49763	6.96866	316.463	8.53747e-71	-0.00448488	6.96866	7.61336e-05	0.993038	-0.995628	0.000424016	0	0.993412
Dnaja2	0.0289435	7.50834	0.425245	0.514331	-0.0872295	7.50834	3.86244	0.0493785	-0.00416783	-0.0242273	0.5344	0.0599468
Dnaja3	0.132101	5.49695	2.34855	0.1254	-0.0580843	5.49695	0.454407	0.500249	-0.0371792	-0.0137304	0.144079	0.522266
Dnaja4	-0.00968746	6.18236	0.0263208	0.871119	0.0253203	6.18236	0.179789	0.671554	0.00916206	0.0166506	0.877545	0.687173
Dnajb1	-0.204746	5.9138	10.3804	0.00127362	-0.10891	5.9138	2.93626	0.0866109	0.0767278	-0.0308268	0.00192871	0.102065
Dnajb11	-0.0148073	7.89282	0.142528	0.70578	-0.0388805	7.89282	0.982768	0.321516	0.0099135	-0.00680756	0.71863	0.347073
Dnajb12	-0.223424	5.57591	5.15214	0.0232177	-0.0542564	5.57591	0.304268	0.581219	0.0783884	-0.012172	0.0300784	0.600183
Dnajb14	-0.0359772	8.47327	1.34104	0.246851	-0.0025787	8.47327	0.00688886	0.933852	0.0175218	0.00541203	0.270093	0.936873
Dnajb2	-0.0513723	7.37451	1.00246	0.316716	-0.0396935	7.37451	0.598458	0.439167	0.0227783	-0.00750686	0.339722	0.462609
Dnajb4	0.872636	7.30801	224.438	9.73541e-51	0.0171453	7.30801	0.0871768	0.767797	-0.286336	0.0125733	0	0.778994
Dnajb5	-0.00652181	7.46692	0.025778	0.872444	-0.00174185	7.46692	0.00183486	0.965833	0.00825153	0.00652839	0.878843	0.967599
Dnajc10	0.330478	7.45604	41.5355	1.15752e-10	-0.0189538	7.45604	0.13666	0.711624	-0.108195	-0.000119051	0	0.725751
Dnajc12	0.381313	6.70521	41.3846	1.25037e-10	0.00154034	6.70521	0.000688198	0.979071	-0.126211	0.00626474	0	0.980065
Dnajc13	0.0918425	6.70147	2.03941	0.153269	-0.0264673	6.70147	0.169395	0.68065	-0.0268434	-0.0034907	0.173057	0.695927
Dnajc14	0.0180729	7.49143	0.179174	0.672084	-0.0546178	7.49143	1.63617	0.200852	-0.000950858	-0.0125133	0.686733	0.223491
Dnajc17	0.282601	6.23764	16.8094	4.13274e-05	-0.172233	6.23764	6.24528	0.0124524	-0.0927238	-0.0541727	6.80373e-05	0.0167372
Dnajc19	-3.98945	4.47968	374.695	1.77801e-83	-0.108875	4.47968	0.292661	0.58852	0.878991	-0.00800212	0	0.60733
Dnajc2	0.0792624	5.10434	0.868661	0.351326	0.0732749	5.10434	0.742647	0.388814	-0.021052	0.0305099	0.374125	0.41306
Dnajc24	0.0278034	4.00511	0.0379389	0.845566	0.0939196	4.00511	0.430836	0.511579	-0.00731282	0.0429054	0.852963	0.533143
Dnajc25	-0.374122	3.71683	6.34635	0.0117623	-0.0467812	3.71683	0.0985446	0.753583	0.139513	-0.00856218	0.0159355	0.76552
Dnajc27	-0.403844	8.81463	226.283	3.85505e-51	-0.0336574	8.81463	1.57201	0.209916	0.144139	-0.00545485	0	0.232829
Dnajc6	-0.0533191	7.81021	1.59833	0.20614	-0.0826616	7.81021	3.84147	0.0499995	0.024443	-0.022833	0.227928	0.0606508
Dnajc7	-0.14398	7.67655	6.96648	0.00830507	-0.0584127	7.67655	1.14681	0.284217	0.0544971	-0.0139103	0.011448	0.30894
Dnajc8	0.0764345	8.63227	6.50146	0.0107786	-0.0380654	8.63227	1.61241	0.204153	-0.0213856	-0.00693307	0.0146339	0.226869
Dnalc1	-0.0220096	5.58816	0.0854158	0.770088	-0.0419721	5.58816	0.310124	0.577604	0.0139752	-0.00691615	0.780926	0.596548
Dner	-0.222952	7.13354	20.2063	6.95246e-06	-0.00764201	7.13354	0.0237867	0.877429	0.081406	0.00416657	8.87443e-06	0.883292
Dnhd1	-0.195512	6.50754	8.9491	0.00277607	0.0763851	6.50754	1.36618	0.242469	0.0715342	0.0315829	0.00421831	0.266431
Dnm3	0.018653	7.85551	0.253313	0.614752	-0.0217131	7.85551	0.343295	0.557933	-0.000482199	-0.00133437	0.631534	0.577494
Dnmt3a	-0.0693577	5.16431	0.806224	0.369239	-0.0147066	5.16431	0.0362777	0.848943	0.0273315	-0.000272049	0.391699	0.855755
Dnpep	-0.0127582	5.13151	0.0123003	0.91169	-0.0900176	5.13151	0.62023	0.430962	0.0054283	-0.0219135	0.916089	0.454536
Dnttip2	-0.0491691	5.41348	0.292123	0.588863	-0.0077923	5.41348	0.00735526	0.931655	0.0187104	0.00386043	0.606366	0.934814
Doc2b	0.150213	3.85453	1.05185	0.305081	-0.060916	3.85453	0.17213	0.678226	-0.0482725	-0.0104845	0.328227	0.69356
Dock1	0.416227	7.58186	71.6607	2.55568e-17	-0.0214419	7.58186	0.190501	0.6625	-0.138142	-0.00117463	0	0.678536
Dock10	-0.0474838	8.73574	2.70832	0.0998261	-0.0528804	8.73574	3.35894	0.0668409	0.0213334	-0.0123107	0.116992	0.0797545
Dock4	0.0558571	6.44108	0.502642	0.478342	0.108299	6.44108	1.89032	0.169165	-0.0139199	0.0449271	0.499266	0.190691
Dock5	8.02533	3.6554	653.503	3.86588e-144	0.117289	3.6554	-6.64612e-10	1	-1	0	0	1
Dock7	0.0776046	5.6546	0.838529	0.359818	0.0582453	5.6546	0.472436	0.491869	-0.0206562	0.0261606	0.382452	0.51393
Dock8	0.0594658	4.1835	0.168794	0.681186	-0.093851	4.1835	0.420759	0.516559	-0.0158188	-0.0283673	0.695483	0.537639
Dock9	0.171485	8.99064	38.6	5.20197e-10	-0.0521705	8.99064	3.57317	0.0587199	-0.0543655	-0.0119893	0	0.0704452
Dom3z	-0.176657	3.75263	0.983051	0.321447	-0.0535293	3.75263	0.0904763	0.763573	0.0605714	-0.0130955	0.344248	0.774992
Dopey1	0.357048	7.4246	58.6437	1.88972e-14	-0.0679763	7.4246	2.12687	0.144736	-0.117554	-0.0173363	0	0.164831
Dpagt1	0.217153	5.06691	4.54102	0.0330918	-0.018402	5.06691	0.0328801	0.85611	-0.0687428	-0.00474626	0.0418281	0.86284
Dpf1	-0.176003	5.2866	3.34423	0.0674409	-0.0343848	5.2866	0.127354	0.721192	0.065769	-0.00352217	0.081204	0.734936
Dpf2	-0.143002	5.98005	3.92975	0.047439	-0.0905033	5.98005	1.57468	0.209529	0.0532923	-0.0268551	0.0584411	0.23246
Dpf3	0.0115008	3.40327	0.00375037	0.951168	0.1676	3.40327	0.79666	0.372094	0.00240125	0.0625876	0.953534	0.396915
Dph1	0.230946	3.87826	2.81211	0.0935553	-0.0230288	3.87826	0.0279351	0.867262	-0.0711391	-0.00114699	0.11017	0.873474
Dpp10	-0.0219737	9.19651	1.38269	0.239644	-0.0577425	9.19651	9.54776	0.00200194	0.0129765	-0.0134354	0.262739	0.00302322
Dpy19l1	-0.612107	8.96428	421.202	1.33602e-93	4.53253e-06	8.96428	1.2772e-09	0.999971	0.213752	0.00582971	0	0.999808
Dpysl3	0.183211	7.41861	16.6438	4.5098e-05	-0.0180788	7.41861	0.162135	0.687199	-0.0581383	-0.000233536	7.09954e-05	0.702044
Dpysl4	-0.258238	4.11175	3.0843	0.0790514	-0.0395164	4.11175	0.0716765	0.788911	0.101686	-0.00298991	0.0938707	0.79924
Dsc3	2.18519	3.66687	143.958	3.6282e-33	-0.10622	3.66687	0.322818	0.569919	-0.631366	-0.0221211	0	0.588919
Dscr3	-0.0990447	5.95506	2.66123	0.102821	-0.163258	5.95506	7.23021	0.00716867	0.0394395	-0.0493035	0.120251	0.00994823
Dsel	-0.10015	6.97587	4.28672	0.0384112	-0.00276753	6.97587	0.00326641	0.954424	0.0398801	0.00631401	0.0480106	0.956503
Dsn1	-0.218938	3.74631	1.96558	0.160918	-0.22508	3.74631	2.06993	0.150229	0.0889945	-0.0690646	0.180973	0.170605
Dst	0.137912	4.00343	1.16404	0.28063	-0.0348695	4.00343	0.0744735	0.784931	-0.0472848	-0.00778642	0.30381	0.795524
Dstn	0.188828	7.04889	11.9524	0.000545782	0.0139729	7.04889	0.0654463	0.798086	-0.0596532	0.0114931	0.000872652	0.808099
Dtd1	-0.118794	6.36646	2.38067	0.122845	-0.0538347	6.36646	0.48876	0.484481	0.0472881	-0.0120876	0.141307	0.506851
Dtd2	0.289931	5.02146	8.68125	0.00321501	-0.135548	5.02146	1.89811	0.16829	-0.0921115	-0.0407524	0.00483656	0.189854
Dtna	-0.944581	8.44207	99.603	1.86222e-23	-0.0957294	8.44207	1.03875	0.308112	0.312552	-0.0257044	0	0.333261
Dtnb	-0.161442	6.53085	1.36833	0.242098	-0.114408	6.53085	0.686773	0.407264	0.0586151	-0.0311914	0.265097	0.431194
Dtwd2	-7.99926	3.62212	709.297	2.84424e-156	0.0179741	3.62212	-1.04733e-10	1	1	0	0	1
Dtx2	0.000740212	4.5048	4.22522e-05	0.994814	-0.0784628	4.5048	0.563306	0.452931	0.00819279	-0.0204198	0.995166	0.476122
Dtx3	0.164317	7.83682	20.7494	5.23479e-06	-0.0014795	7.83682	0.00168051	0.967301	-0.0513973	0.00563685	2.95814e-06	0.968916
Dusp11	0.109216	3.25857	0.502632	0.478346	-0.019468	3.25857	0.0157299	0.900192	-0.0353353	-0.00141169	0.499269	0.904783
Dusp12	0.320638	6.56392	27.0616	1.97076e-07	-0.0094862	6.56392	0.0237313	0.877571	-0.1041	0.00175569	0	0.883455
DUSP12	0.351413	4.57258	15.0186	0.000106459	0.0159717	4.57258	0.0310249	0.860185	-0.115006	0.0103963	0.000141991	0.866665
Dusp14	0.0980837	3.86906	0.640546	0.423513	-0.17245	3.86906	1.97498	0.15992	-0.0352603	-0.0475784	0.445582	0.181021
Dusp16	-0.13411	6.49343	4.76957	0.0289671	0.0252777	6.49343	0.1693	0.680734	0.0518174	0.0141699	0.0369058	0.695995
Dusp19	0.563271	6.50204	78.297	8.86586e-19	-0.0412407	6.50204	0.420046	0.516914	-0.185093	-0.00694433	0	0.5379
Dusp26	3.17013	5.51136	619.1	1.17329e-136	0.00436058	5.51136	0.00102749	0.974429	-0.789185	0.00242649	0	0.975785
Dusp3	-0.696964	5.30328	83.5624	6.17352e-20	-0.0126446	5.30328	0.0276842	0.867853	0.245597	0.00235581	0	0.873977
Dusp6	0.195253	7.1275	19.8365	8.43571e-06	0.0234589	7.1275	0.286326	0.592585	-0.0621774	0.0137793	8.87443e-06	0.611253
Dusp7	-0.826764	4.26255	24.9914	5.75871e-07	-0.0488863	4.26255	0.0908427	0.763109	0.284074	-0.0115513	0	0.774519
Dvl1	-0.00263132	8.00592	0.00672768	0.934629	0.0225657	8.00592	0.494975	0.481716	0.00584431	0.0138984	0.93742	0.50407
Dvl2	0.196035	5.30214	6.27151	0.0122695	-0.0710621	5.30214	0.824014	0.364009	-0.0626539	-0.0178271	0.0166277	0.389114
Dym	-0.124175	6.09349	3.84175	0.0499913	-0.0231375	6.09349	0.133259	0.715076	0.0497843	-0.000830428	0.0613667	0.729049
Dync1h1	-0.00993263	11.0553	0.438583	0.507807	0.0187438	11.0553	1.56185	0.211395	0.0086055	0.0126468	0.527951	0.234291
Dync1i1	0.00850352	5.45103	0.0115709	0.914338	-0.0246416	5.45103	0.09758	0.754753	0.00659164	8.58548e-05	0.918465	0.766653
Dynll1	1.091	4.87906	181.466	2.31963e-41	0.0441028	4.87906	0.289468	0.590562	-0.3573	0.0187568	0	0.60928
Dynll2	-0.25765	9.07147	105.76	8.32328e-25	0.0225584	9.07147	0.810758	0.367896	0.0944893	0.0138357	0	0.392948
Dynlrb1	-0.076928	8.61152	6.71435	0.00956404	-0.0415917	8.61152	1.96263	0.161233	0.0319956	-0.00794003	0.0131637	0.182414
Dynlrb2	0.283768	4.44129	5.87135	0.0153892	-0.180745	4.44129	2.37971	0.12292	-0.0930348	-0.05287	0.0205502	0.141364
Dyrk1a	-0.156939	4.7247	2.65192	0.103425	-0.060824	4.7247	0.399249	0.527477	0.0637511	-0.0195798	0.120846	0.548176
Dyrk2	-0.12495	5.13984	1.66605	0.196789	0.0646997	5.13984	0.446722	0.503896	0.0488725	0.0299375	0.218284	0.525836
Dzank1	0.0464769	10.4337	9.49998	0.00205475	-0.0144468	10.4337	0.91788	0.338032	-0.0111478	0.00129982	0.00317704	0.363313
E030011O05Rik	-0.220105	3.495	1.51491	0.218392	0.0294957	3.495	0.0274616	0.868381	0.0817722	0.0192751	0.24092	0.874471
E030018B13Rik	0.513152	3.48747	8.89646	0.00285724	0.0373595	3.48747	0.0463239	0.829588	-0.169395	0.0101355	0.00433664	0.837699
E030019B06Rik	-0.483162	3.32812	5.08533	0.0241291	-0.131957	3.32812	0.367962	0.544117	0.160745	-0.032374	0.0311108	0.564304
E130208F15Rik	-0.368444	5.68302	25.5853	4.23247e-07	0.0210052	5.68302	0.0832992	0.772875	0.132771	0.0145269	0	0.783875
E130308A19Rik	-0.0483007	4.75229	0.309623	0.577911	-0.0043874	4.75229	0.00253192	0.959869	0.0239053	0.00890505	0.596252	0.961819
E130309D14Rik	0.0105313	6.28116	0.033823	0.854084	-0.10303	6.28116	3.23951	0.0718821	0.0021282	-0.0280536	0.861535	0.0853247
E2f1	-2.593	4.01654	28.5756	9.01117e-08	0.307007	4.01654	0.419272	0.5173	0.561128	0.0943929	0	0.538222
E2f5	0.105768	5.07751	1.43278	0.231311	0.209018	5.07751	5.59404	0.0180217	-0.0318503	0.0740776	0.254282	0.0234403
E430024P14Rik	3.17708	4.51157	489.455	1.87197e-108	-0.122753	4.51157	0.685479	0.407706	-0.795642	-0.0137744	0	0.431676
E430025E21Rik	0.0814403	4.89061	0.577193	0.447415	0.136924	4.89061	1.63107	0.201554	-0.0241412	0.051693	0.468836	0.224215
Ebag9	0.226331	6.37247	6.50368	0.0107651	-0.022474	6.37247	0.0640396	0.800221	-0.071428	-0.000749099	0.014628	0.810031
Ebf3	0.107574	4.00945	0.69992	0.402811	-0.12365	4.00945	0.923173	0.336643	-0.0325624	-0.033854	0.425064	0.361929
Ece2	0.139834	6.1284	3.23121	0.0722474	0.0323747	6.1284	0.173451	0.677063	-0.0410882	0.0186056	0.08657	0.692474
Ecel1	0.0313493	6.78806	0.246211	0.619756	0.065823	6.78806	1.0852	0.297537	-0.00584392	0.0285119	0.636317	0.32268
Echs1	0.0965052	5.48976	1.61827	0.203333	0.00938307	5.48976	0.0152804	0.901621	-0.0285811	0.00605811	0.225091	0.906106
Eci1	0.110337	4.5562	0.927758	0.335446	-0.175048	4.5562	2.3309	0.126829	-0.0396702	-0.0555877	0.358293	0.145549
Edem2	0.16222	4.96438	3.75197	0.0527453	-0.0811139	4.96438	0.937715	0.332866	-0.0489903	-0.0203304	0.0645112	0.358107
Edem3	0.00688871	9.07925	0.0639083	0.800422	0.0088339	9.07925	0.105097	0.745796	0.00281926	0.00920092	0.809605	0.758172
Eed	0.314977	4.85476	10.8066	0.00101138	0.00554983	4.85476	0.00342877	0.953306	-0.105363	0.0122549	0.00156486	0.955459
Eef1a1	-3.21045	12.5358	23486.8	0	-0.00721169	12.5358	0.134278	0.714037	0.806505	0.00132773	0	0.727978
Eef1e1	-0.0250207	7.02302	0.231333	0.630537	-0.0512864	7.02302	0.971591	0.324284	0.0142889	-0.0113867	0.64662	0.349685
Eef1g	0.198692	7.91167	23.1225	1.52003e-06	0.0213183	7.91167	0.26614	0.605933	-0.0638573	0.0134481	0	0.624056
Efcab14	0.238404	7.25811	28.128	1.1355e-07	-0.0420893	7.25811	0.87667	0.349115	-0.0760431	-0.00896244	0	0.374033
Efcc1	-0.45442	5.82424	43.647	3.93286e-11	-0.050279	5.82424	0.533866	0.464986	0.160252	-0.0110049	0	0.487892
Efhd1	0.0801496	5.70586	0.907505	0.340777	0.0369432	5.70586	0.192768	0.660623	-0.0231564	0.0190368	0.36363	0.676743
Efnb3	-0.0331462	8.40644	1.2668	0.260368	0.0311739	8.40644	1.12048	0.289814	0.0171478	0.0171464	0.28352	0.31469
Efr3a	0.134319	7.90201	12.4512	0.000417724	0.00195324	7.90201	0.00263753	0.959041	-0.0409259	0.0070018	0.000659666	0.960929
Efr3b	-0.155457	9.14296	30.5944	3.18013e-08	-0.036521	9.14296	1.68875	0.193766	0.0589509	-0.00636812	0	0.216166
Eftud1	0.321897	4.76064	7.98659	0.00471252	-0.0883396	4.76064	0.601884	0.43786	-0.10431	-0.0233575	0.00689839	0.46131
Eftud2	0.109685	6.71083	3.57009	0.058829	-0.0247355	6.71083	0.181577	0.670021	-0.0331357	-0.00291667	0.0713208	0.685706
Egfem1	0.301612	5.59947	12.0067	0.000530091	0.021876	5.59947	0.063199	0.801509	-0.0982018	0.0132967	0.000857861	0.811262
Egfl8	-0.147906	5.05823	3.19507	0.0738608	0.0193096	5.05823	0.0543265	0.815699	0.0578603	0.014658	0.0882591	0.824553
Egfr	-0.0475848	4.42867	0.16709	0.682711	-0.109801	4.42867	0.88858	0.345862	0.0234253	-0.0300722	0.696867	0.370945
Egln1	-0.419521	3.96988	10.8042	0.00101271	0.0329097	3.96988	0.0667788	0.796086	0.149901	0.0193879	0.00156486	0.806041
Egr1	0.0807655	4.45669	0.624129	0.429517	0.0312746	4.45669	0.0939121	0.759261	-0.0334073	0.0217642	0.451359	0.770981
Ehbp1	0.00266433	7.08208	0.00165672	0.967533	-0.294777	7.08208	20.3172	6.56078e-06	0.0052387	-0.0929879	0.969209	1.18326e-05
Ehbp1l1	0.681855	6.75514	125.006	5.07357e-29	0.0148126	6.75514	0.0590831	0.807951	-0.225998	0.0120244	0	0.817166
Ehd3	-0.157186	6.68831	9.25784	0.0023449	-0.156431	6.68831	9.16741	0.00246364	0.0602859	-0.0470555	0.00357639	0.00369472
Ehd4	0.335363	3.9303	8.09133	0.00444775	0.018713	3.9303	0.0254288	0.873303	-0.108757	0.0196611	0.00653454	0.879184
Ehmt2	0.0281677	8.34127	0.713611	0.398248	-0.0249822	8.34127	0.561328	0.453726	-0.0043931	-0.00240039	0.420633	0.476906
Ei24	-0.106863	7.72401	6.03216	0.0140476	-0.0269245	7.72401	0.382936	0.536036	0.0423	-0.00242083	0.0188345	0.556643
Eif1b	0.0759469	7.68951	3.08962	0.0787932	-0.00910135	7.68951	0.0443845	0.83314	-0.0204781	0.00290005	0.0935483	0.841035
Eif2ak3	-0.106545	5.81808	2.50638	0.113386	-0.0753054	5.81808	1.25204	0.263164	0.0421573	-0.0207615	0.131232	0.287694
Eif2ak4	0.104143	7.49969	6.62008	0.0100835	-0.0324149	7.49969	0.641353	0.423221	-0.0310113	-0.0051294	0.0137613	0.446999
Eif2b1	0.0502034	6.09657	0.840324	0.359304	-0.0693958	6.09657	1.60624	0.205021	-0.010734	-0.0190197	0.381997	0.227866
Eif2b3	-0.142514	5.57389	2.75537	0.0969286	0.00166635	5.57389	0.000380604	0.984435	0.0543261	0.00686423	0.113658	0.985029
Eif2b5	0.399089	7.41447	88.6244	4.77376e-21	0.00528852	7.41447	0.0156448	0.900461	-0.132334	0.00820714	0	0.904996
Eif2d	-0.0719345	4.311	0.287943	0.591542	-0.152966	4.311	1.30001	0.254211	0.0360503	-0.0540346	0.608981	0.278364
Eif2s1	-8.03128	5.21694	1581.02	0	-0.61614	5.21694	3.42126	0.0643617	0.993065	-0.00424636	0	0.0770448
Eif2s2	-2.14363	6.08667	14.202	0.000164197	-0.665768	6.08667	1.26823	0.260098	0.465778	-0.0714486	0.000236651	0.284488
Eif3a	6.47433	3.76756	614.159	1.39353e-135	-0.600516	3.76756	2.16794	0.140915	-0.979781	-0.00488965	0	0.160568
Eif3c	0.246675	3.50828	2.74334	0.0976602	-0.316947	3.50828	4.5252	0.0333991	-0.0708763	-0.0990917	0.114445	0.0415087
Eif3e	0.102796	9.60113	15.8168	6.97812e-05	0.0104584	9.60113	0.163742	0.685735	-0.0306228	0.009654	0.000100577	0.700601
Eif3f	-0.0275477	7.33461	0.349	0.55468	-0.0154728	7.33461	0.11013	0.739996	0.0145501	0.000284911	0.573788	0.753048
Eif3h	0.421585	8.29774	161.397	5.60285e-37	-0.016774	8.29774	0.255657	0.61312	-0.13992	0.00106309	0	0.631013
Eif3i	-0.0378399	7.738	0.766795	0.381211	-0.0280121	7.738	0.420213	0.516831	0.0186294	-0.00363168	0.403624	0.537835
Eif3j1	-0.0607653	6.74003	1.47417	0.224689	0.0219341	6.74003	0.192037	0.661227	0.0265629	0.0131052	0.247416	0.677305
Eif3m	-0.117671	6.52913	4.30538	0.0379921	-0.0561209	6.52913	0.979197	0.322397	0.045878	-0.011803	0.0475373	0.347878
Eif4a-ps4	-4.25838	5.28792	871.97	1.2169e-191	-0.1008	5.28792	0.460534	0.497374	0.899851	-0.00635422	0	0.519305
Eif4a1	0.893411	8.98655	1170.61	1.49182e-256	0.000179093	8.98655	4.75416e-05	0.994499	-0.295287	0.00606501	0	0.994835
Eif4a2	0.0818431	10.1641	19.1383	1.21583e-05	-0.0088204	10.1641	0.222305	0.637289	-0.0232008	0.00317429	1.47907e-05	0.654365
Eif4e	2.98888	8.24703	4086.07	0	0.0660539	8.24703	2.01767	0.155478	-0.773119	0.0117692	0	0.176089
Eif4e2	-0.0154478	6.3698	0.0643614	0.799731	0.0201357	6.3698	0.109388	0.740842	0.00994097	0.0130634	0.80896	0.753773
Eif4g1	-0.351984	8.24545	74.7513	5.33915e-18	0.00737274	8.24545	0.0328281	0.856222	0.126416	0.00820891	0	0.862967
Eif4g2	0.0273256	8.92986	0.95407	0.328685	-0.0129819	8.92986	0.215352	0.642605	-0.00443294	0.00126468	0.351599	0.659459
Eif4g3	0.15202	5.91391	5.27904	0.0215836	-0.0509294	5.91391	0.5922	0.44157	-0.0463321	-0.0110171	0.0279456	0.465112
Eif4h	0.00605381	9.49424	0.0617696	0.803721	-0.0201451	9.49424	0.683998	0.408213	0.00312457	-0.000807801	0.812927	0.432179
Eif5a2	-0.0253383	9.55359	1.4925	0.22183	-0.0373258	9.55359	3.23872	0.071917	0.0140008	-0.0069387	0.24447	0.0853631
Eif6	0.218248	7.19348	17.5816	2.75232e-05	0.0843233	7.19348	2.62482	0.105204	-0.0700436	0.0349333	4.1414e-05	0.122488
Elac1	-0.090019	6.41495	2.03046	0.154174	0.0123463	6.41495	0.0382295	0.844983	0.0370727	0.0111457	0.174022	0.85217
Elac2	-0.000382224	4.79139	1.55837e-05	0.99685	0.102937	4.79139	0.901871	0.342281	0.00699973	0.0406308	0.997116	0.367478
Elavl4	0.0278344	8.26553	0.430969	0.511514	0.00352586	8.26553	0.00693593	0.933627	-0.00468861	0.00876125	0.531552	0.936711
Elf2	0.039744	7.33811	0.651454	0.419593	-0.0430441	7.33811	0.764199	0.382018	-0.00792381	-0.00863349	0.441822	0.40654
Elk3	0.203341	4.58482	4.36483	0.0366882	-0.144014	4.58482	2.19099	0.13882	-0.0582117	-0.0438607	0.0460169	0.158329
Elk4	-0.0390486	5.84065	0.345696	0.55656	0.0410491	5.84065	0.382085	0.53649	0.0176338	0.0203978	0.575601	0.557033
Elmo1	0.0680133	4.33497	0.217728	0.640777	-0.171335	4.33497	1.38151	0.239844	-0.017161	-0.0520636	0.656465	0.263668
Elmo2	0.370588	5.76047	20.0699	7.46613e-06	-0.0797184	5.76047	0.928408	0.335277	-0.121347	-0.0201528	8.87443e-06	0.360524
Elmod2	-0.112985	7.62652	7.01595	0.00807866	-0.0585851	7.62652	1.88631	0.169619	0.0452726	-0.0137409	0.0112084	0.19109
Elmsan1	-0.559949	3.38142	18.102	2.09382e-05	0.0303338	3.38142	0.0512728	0.820863	0.194552	0.0140808	2.95814e-05	0.829596
Elovl1	0.154123	4.3952	1.08268	0.298098	0.325149	4.3952	4.80466	0.0283829	-0.0528379	0.116413	0.321455	0.0359148
Elovl4	-0.670433	6.69837	109.243	1.43575e-25	0.124333	6.69837	3.76645	0.0522906	0.230742	0.0457699	0	0.063319
Elovl5	-0.0248935	7.84801	0.418659	0.517607	0.0855785	7.84801	4.9482	0.0261178	0.0140343	0.0362528	0.537562	0.0332584
Elp2	0.0798315	5.74151	0.736254	0.390864	-0.121737	5.74151	1.71382	0.190491	-0.0202008	-0.0364159	0.413264	0.212794
Elp4	0.0176368	5.79759	0.0487965	0.825171	-0.0161222	5.79759	0.0408678	0.839793	-0.000997829	-0.00148456	0.833436	0.847357
Elp5	-0.0836892	7.90093	4.26016	0.0390163	-0.0719223	7.90093	3.14632	0.0760985	0.0339729	-0.0183423	0.0486999	0.0902115
Eltd1	0.199623	6.02415	6.35228	0.011723	-0.117721	6.02415	2.20968	0.137148	-0.0627015	-0.0338999	0.0158941	0.156643
Emb	-0.0669265	8.25898	4.04354	0.0443408	-0.0219338	8.25898	0.434312	0.509881	0.0287205	-0.00134589	0.0549505	0.531593
Emc1	0.355211	5.81179	17.0592	3.62329e-05	0.0219341	5.81179	0.0650128	0.798742	-0.115115	0.0126895	6.2121e-05	0.808724
Emc10	0.467957	9.15156	271.558	5.19131e-61	0.00393951	9.15156	0.0192912	0.889535	-0.155279	0.0074382	0	0.894841
Emc2	0.108409	7.68027	6.34543	0.0117684	-0.0371761	7.68027	0.746204	0.387681	-0.0321917	-0.00661732	0.0159385	0.411957
Emc4	-0.0151192	4.039	0.00990465	0.920724	-0.0894682	4.039	0.332999	0.563898	0.0163403	-0.0252141	0.924375	0.583195
Emc9	0.657363	3.4019	17.6688	2.6291e-05	0.0829508	3.4019	0.286403	0.592535	-0.218293	0.0368443	4.1414e-05	0.611214
Emcn	0.534001	3.9421	8.68917	0.00320107	0.0610208	3.9421	0.114692	0.734864	-0.165821	0.0296796	0.0048129	0.748206
Eme1	0.0475938	6.19504	0.556362	0.45573	-0.0796691	6.19504	1.55897	0.211817	-0.0111032	-0.0211267	0.477137	0.234735
Eme2	0.0630928	7.86253	3.60945	0.057452	-0.00609249	7.86253	0.0336528	0.854447	-0.0163939	0.00419569	0.0697648	0.861269
Eml1	-0.0577778	7.74086	1.33517	0.247888	0.00141511	7.74086	0.000803032	0.977393	0.0256604	0.0067137	0.271185	0.978509
Eml5	6.61829	4.49926	1064.05	2.15152e-233	0.308011	4.49926	1.12188	0.289514	-0.984713	0.00473886	0	0.314394
Eml6	0.0636058	7.54945	2.12604	0.144814	-0.0894226	7.54945	4.20185	0.0403799	-0.0170199	-0.0245287	0.164446	0.0496909
Emp1	-0.609671	3.64657	14.9484	0.000110489	0.160627	3.64657	1.04423	0.306839	0.201028	0.0671438	0.000153823	0.332022
Enc1	-0.0910251	8.84622	10.5539	0.00115945	-0.0247193	8.84622	0.778298	0.377662	0.0366214	-0.00246763	0.00175122	0.402239
Eno1	1.55634	7.42452	1090.75	3.37676e-239	-0.125129	7.42452	7.06579	0.00785696	-0.486631	-0.0291331	0	0.0108653
Eno3	-0.841145	3.96625	15.4137	8.63583e-05	0.329834	3.96625	2.35313	0.125031	0.26415	0.0997717	0.000118326	0.143615
Enox1	-0.406129	5.36866	30.9453	2.65407e-08	-0.0256904	5.36866	0.123463	0.725308	0.149397	-0.00197543	0	0.738956
Enpep	0.225071	3.81739	1.24936	0.263676	-0.230431	3.81739	1.31326	0.251805	-0.0640932	-0.0701079	0.28686	0.275799
Enpp1	0.18494	5.38532	3.81949	0.0506595	0.0849007	5.38532	0.805018	0.369597	-0.0589543	0.0349526	0.0621447	0.394465
Enpp2	0.0259511	9.06142	0.672639	0.412133	-0.0244685	9.06142	0.597962	0.439357	-0.00394327	-0.00223004	0.434403	0.462846
Enpp4	0.229809	4.29266	4.32449	0.0375676	-0.0759915	4.29266	0.471468	0.492313	-0.0835059	-0.0250166	0.0470581	0.514344
Enpp5	-2.08175	6.21382	931.519	1.38092e-204	0.0947851	6.21382	1.89466	0.168678	0.620208	0.0252378	0	0.190232
Enpp6	-0.882808	3.89398	43.92	3.4208e-11	0.072668	3.89398	0.297796	0.585268	0.295251	0.0225961	0	0.604201
Entpd3	0.058974	4.84616	0.626353	0.428696	0.12135	4.84616	2.65332	0.103334	-0.0139926	0.0487236	0.450608	0.120464
Eny2	-0.0324778	4.79418	0.127517	0.72102	0.0595461	4.79418	0.429227	0.512369	0.0143528	0.0300651	0.733477	0.533856
Ep300	-0.0129505	5.91252	0.0270005	0.869481	-0.0227719	5.91252	0.0834538	0.77267	0.00876527	-0.000513959	0.875918	0.783733
Epas1	1.8913	4.7481	282.835	1.81032e-63	-0.0624437	4.7481	0.304156	0.581289	-0.567593	-0.014179	0	0.600237
Epb4.1	0.188515	6.93428	11.1138	0.000856893	-0.0487555	6.93428	0.743519	0.388536	-0.0591826	-0.0107475	0.001343	0.412773
Epb4.1l1	-0.0308704	10.7071	2.77324	0.0958522	-0.0242063	10.7071	1.70515	0.191616	0.0160309	-0.00221204	0.11251	0.213968
Epb4.1l2	0.110826	5.87222	1.54229	0.214278	-0.0397747	5.87222	0.198641	0.65582	-0.0319884	-0.00672107	0.236557	0.672117
Epb4.1l4a	-0.2319	5.82949	9.89463	0.00165761	0.0423027	5.82949	0.329497	0.565955	0.0838724	0.0205654	0.00254696	0.585141
Epb4.1l4b	-0.0842462	3.12287	0.26367	0.60761	-0.220663	3.12287	1.7978	0.179978	0.0367582	-0.0662974	0.62465	0.201958
Epc1	-0.0961112	5.20309	1.31313	0.251829	0.129722	5.20309	2.39212	0.121948	0.0388061	0.0513425	0.275084	0.140343
Epha10	-0.114742	5.4756	2.05434	0.151773	-0.100754	5.4756	1.58475	0.208078	0.0441277	-0.0307201	0.17167	0.23096
Epha4	0.191096	9.39813	74.4668	6.16657e-18	-0.0164195	9.39813	0.54985	0.458379	-0.0607619	0.000600552	0	0.48139
Epha5	0.0338722	7.71127	0.613453	0.43349	-0.0250537	7.71127	0.335593	0.562384	-0.00658128	-0.00242661	0.455196	0.581748
Epha6	0.0811178	7.11774	2.19823	0.138169	-0.0539839	7.11774	0.973516	0.323805	-0.0228651	-0.0120676	0.157583	0.349221
Ephb1	0.101638	7.24437	4.34191	0.0371852	-0.0914116	7.24437	3.51214	0.0609207	-0.0295883	-0.0253872	0.0466322	0.0729507
Ephb2	-0.0531455	5.54833	0.386133	0.534339	0.00898952	5.54833	0.0110281	0.916364	0.0245507	0.00869415	0.553856	0.92003
Ephb3	-0.192954	3.55278	1.66799	0.196528	0.16433	3.55278	1.21397	0.270547	0.0673538	0.0689771	0.218051	0.295288
Ephx1	0.362301	4.07928	9.0687	0.00260022	0.064678	4.07928	0.28776	0.59166	-0.111637	0.0239173	0.00394616	0.610401
Ephx4	-0.863776	3.58935	23.4753	1.26531e-06	0.313212	3.58935	3.0495	0.0807619	0.287014	0.105882	0	0.095403
Epm2aip1	0.0686107	7.44739	2.14799	0.142757	0.0377363	7.44739	0.649913	0.420144	-0.0181046	0.0198977	0.162393	0.444005
Epn1	-0.398811	7.20331	7.09267	0.00773997	-0.0130768	7.20331	0.007614	0.930466	0.130936	0.00104376	0.0107173	0.933667
Epn3	0.366252	6.53487	46.0878	1.13071e-11	0.0435598	6.53487	0.651912	0.41943	-0.1208	0.0212222	0	0.443292
Eprs	0.0348223	9.63057	2.06525	0.15069	0.0274738	9.63057	1.28558	0.256864	-0.00675553	0.0157628	0.170543	0.2811
Eps15	-10.5797	6.06743	2682.65	0	0.113754	6.06743	8.42265e-10	0.999977	1	0	0	0.999808
Eps8l3	-0.178817	3.7916	2.27735	0.131276	0.0738717	3.7916	0.389461	0.532583	0.0728304	0.0368274	0.150333	0.553353
Ept1	1.77301	4.26403	129.671	4.83756e-30	-0.140195	4.26403	0.812632	0.367343	-0.530546	-0.0243453	0	0.392439
Eral1	0.0252229	4.79384	0.0485882	0.825538	-0.0634215	4.79384	0.308862	0.578379	-0.0011328	-0.0175384	0.833752	0.597352
Erbb2ip	-0.134104	7.03875	7.56593	0.00594818	-0.0552896	7.03875	1.28602	0.256782	0.0520666	-0.0128879	0.00852241	0.281032
Erbb3	0.552199	7.26435	122.417	1.87051e-28	-0.00273271	7.26435	0.00301733	0.956194	-0.183715	0.0049195	0	0.958068
Erbb4	0.255233	6.54363	19.3114	1.1104e-05	0.0147784	6.54363	0.0648321	0.799015	-0.0807276	0.013818	1.47907e-05	0.808957
Erc1	-0.0222458	7.91282	0.235174	0.627713	-0.0662366	7.91282	2.08519	0.148734	0.0125103	-0.0170817	0.643804	0.169011
Ercc1	0.457423	5.06857	32.3911	1.26062e-08	0.0437677	5.06857	0.295195	0.586911	-0.151722	0.0184859	0	0.605792
Ercc2	0.0437081	3.93802	0.103871	0.747233	0.0418567	3.93802	0.0957999	0.756929	-0.00232395	0.0203107	0.759003	0.768656
Ercc6l2	-0.112214	5.40586	2.93788	0.086524	0.00165511	5.40586	0.000634712	0.979901	0.0444446	0.00551017	0.102106	0.980858
Erf	-0.0753078	3.96855	0.40184	0.52614	0.00846572	3.96855	0.00513703	0.942862	0.0262345	0.0165821	0.545964	0.945523
Ergic1	0.197673	9.57175	77.9469	1.05848e-18	-0.0572089	9.57175	6.5299	0.0106076	-0.0631757	-0.0134963	0	0.0143677
Ergic3	-0.105011	7.33896	4.90405	0.0267937	0.018838	7.33896	0.157868	0.691127	0.0408578	0.0127607	0.0342937	0.705881
Erich1	0.151411	3.97025	0.984129	0.321182	-0.0255232	3.97025	0.0284955	0.865949	-0.0486695	-0.00407462	0.34402	0.872117
Erlin2	-0.190242	7.05374	22.0659	2.63447e-06	0.020178	7.05374	0.248371	0.618224	0.0707364	0.0139273	0	0.636116
Ermn	-4.37959	5.16888	423.964	3.3463e-94	-0.29932	5.16888	2.10759	0.14657	0.903558	-0.0113305	0	0.16673
Ern1	0.000581804	5.27026	6.9582e-05	0.993344	-0.0264804	5.27026	0.145339	0.70303	0.0051164	-0.000341927	0.993714	0.717489
Ero1l	0.100397	6.37597	2.19771	0.138216	-0.0806961	6.37597	1.42032	0.233351	-0.0277843	-0.0216226	0.157631	0.256915
Ero1lb	9.31882	4.84215	1470.19	0	0.0511179	4.84215	4.49238e-10	0.999983	-1	0	0	0.999808
Erp44	0.114956	5.86128	2.81928	0.0931379	-0.0921574	5.86128	1.81167	0.178308	-0.0362515	-0.0265949	0.109632	0.200281
Esco1	0.0735277	6.00664	1.62816	0.201957	-0.0440659	6.00664	0.584719	0.444468	-0.0200899	-0.00895375	0.223559	0.46791
Esf1	0.117054	6.15666	2.47725	0.115504	0.0922444	6.15666	1.53914	0.214746	-0.0364325	0.0404292	0.133507	0.237867
Esrrg	0.104939	6.63794	5.20371	0.0225387	0.000214707	6.63794	2.2591e-05	0.996208	-0.0308537	0.00639647	0.0291791	0.996512
Esyt1	-0.299713	7.02909	19.2608	1.14024e-05	-0.0571478	7.02909	0.700995	0.40245	0.106668	-0.0134529	1.47907e-05	0.426585
Esyt2	0.254485	5.50961	11.6066	0.00065719	-0.06393	5.50961	0.731365	0.392441	-0.0832407	-0.01719	0.00105606	0.416492
Esyt3	-0.641515	4.09236	19.7897	8.64485e-06	-0.0217597	4.09236	0.0255623	0.872974	0.221413	-0.000325979	8.87443e-06	0.878897
Etf1	0.0898274	5.36274	1.21935	0.269489	-0.0903629	5.36274	1.23415	0.266602	-0.025542	-0.0256178	0.292738	0.291075
Etfb	0.0641502	6.64647	1.12544	0.28875	0.00808539	6.64647	0.0178788	0.893631	-0.0169519	0.00850399	0.31206	0.898562
Ethe1	-0.327625	6.12834	14.2379	0.000161097	-0.0713773	6.12834	0.676709	0.410722	0.116736	-0.0196056	0.000236651	0.434607
Etl4	0.346843	5.00916	6.53465	0.0105793	0.0229058	5.00916	0.0281319	0.866799	-0.110775	0.0110176	0.0143647	0.872998
Etnk1	-0.17557	10.9839	184.114	6.12683e-42	-0.0277683	10.9839	4.60589	0.0318624	0.0659686	-0.00339466	0	0.0397545
Etohd2	-0.089512	5.44565	1.68583	0.194151	0.0268998	5.44565	0.152052	0.696582	0.0385063	0.0129041	0.215515	0.711253
Etv4	-0.285897	4.56851	7.83441	0.00512608	0.0764152	4.56851	0.55879	0.454748	0.103673	0.0309291	0.00745452	0.477808
Etv5	-3.39282	7.90433	3140.22	0	0.0222423	7.90433	0.138528	0.709749	0.825879	0.0042002	0	0.723961
Etv6	0.0615868	6.42579	1.39825	0.237017	-0.00104022	6.42579	0.000395988	0.984124	-0.0153328	0.00679347	0.259923	0.984769
Eva1a	-0.372775	4.34621	8.27659	0.00401594	-0.0133329	4.34621	0.0106419	0.917836	0.131984	0.00147723	0.00598136	0.921449
Evi5	0.0178021	4.0503	0.0169434	0.896434	0.00466665	4.0503	0.00112647	0.973226	-0.00134428	0.00440714	0.901591	0.974613
Evl	0.0331965	5.56012	0.216941	0.641381	0.0180015	5.56012	0.0638947	0.800443	-0.0056442	0.0142515	0.657154	0.810253
Evpl	0.833611	4.46339	38.9618	4.32175e-10	-0.0407919	4.46339	0.0905757	0.763447	-0.274992	-0.00282463	0	0.774865
Ewsr1	-0.186398	3.28095	1.67934	0.195012	-0.100076	3.28095	0.485672	0.485864	0.0674391	-0.0231282	0.216409	0.508194
Exd1	-0.00608308	3.52513	0.00165353	0.967564	0.0584919	3.52513	0.140122	0.70816	0.0115459	0.024579	0.969226	0.722381
Exoc1	7.57487	3.83153	781.266	6.38734e-172	0.720422	3.83153	4.38366	0.0362851	-0.994678	0.00532156	0	0.0448306
Exoc3	0.339565	8.73921	116.332	4.01985e-27	-0.00875445	8.73921	0.0773958	0.780858	-0.111872	0.0029158	0	0.791489
Exoc5	-0.0693958	7.78426	3.17023	0.074992	-0.0593583	7.78426	2.31941	0.127769	0.0294931	-0.0142924	0.0893951	0.146603
Exoc7	-0.149142	7.95185	12.4616	0.000415411	0.0059184	7.95185	0.0196238	0.888593	0.0562285	0.00796733	0.000653749	0.893948
Exoc8	0.123365	4.28159	1.86962	0.171519	-0.00597435	4.28159	0.0043791	0.947239	-0.0416729	0.0042756	0.191954	0.949602
Exog	-0.123435	6.45678	4.90644	0.0267567	-0.00636461	6.45678	0.0130112	0.909185	0.0479563	0.00408387	0.0342435	0.913054
Exosc1	-0.215929	5.77467	6.45367	0.0110724	-0.00271148	5.77467	0.0010112	0.974632	0.0784424	0.00630929	0.0150629	0.976021
Exosc5	0.261194	5.04462	6.98625	0.00821384	-0.155011	5.04462	2.46093	0.116709	-0.0820542	-0.0449948	0.0113445	0.134865
Exosc8	0.301041	3.87393	4.77099	0.0289432	-0.0254838	3.87393	0.0331711	0.855481	-0.09649	0.00425592	0.036888	0.862225
Exosc9	-0.184675	6.24564	5.89761	0.0151614	-0.04596	6.24564	0.365275	0.545591	0.0694415	-0.0100228	0.0202307	0.565789
Ext1	-0.119037	5.33499	1.78734	0.181251	-0.0843679	5.33499	0.897577	0.343432	0.048114	-0.0215153	0.20205	0.368555
Ext2	0.213427	6.50391	9.05396	0.00262127	-0.185707	6.50391	6.85524	0.00883819	-0.0682099	-0.0575696	0.00398166	0.0121639
Extl2	-0.034078	7.99386	0.821312	0.364797	-0.0372843	7.99386	0.983134	0.321426	0.0171007	-0.0070145	0.38725	0.346999
Extl3	-6.16723	4.44029	760.624	1.96539e-167	0.361706	4.44029	1.65222	0.198658	0.975234	0.00582589	0	0.221225
Eya3	-0.43163	7.6664	78.121	9.69166e-19	-0.0261103	7.6664	0.286245	0.592637	0.152927	-0.00289986	0	0.611312
Ezr	-0.146542	5.46616	2.55353	0.110048	0.0543413	5.46616	0.351502	0.553264	0.0555689	0.0266228	0.127552	0.573108
F11r	0.506707	4.69877	20.4129	6.24069e-06	0.115874	4.69877	1.0691	0.301148	-0.168233	0.0519197	5.91628e-06	0.326357
F2r	-0.169935	5.09687	4.80814	0.0283256	0.190614	5.09687	6.05244	0.0138871	0.0608587	0.0721723	0.0361396	0.0184618
F3	-0.365625	7.96705	59.1536	1.45836e-14	-0.0326331	7.96705	0.471897	0.492116	0.130582	-0.00503156	0	0.514143
Fabp5	0.0852827	5.20403	1.26774	0.260192	-0.0235545	5.20403	0.096663	0.755872	-0.0225815	-0.00222441	0.283322	0.767668
Fabp7	0.266322	4.72825	5.68429	0.0171174	0.0574985	4.72825	0.267002	0.60535	-0.096685	0.0371575	0.0227008	0.623517
Fadd	0.386081	3.93418	9.7088	0.00183388	-0.0448658	3.93418	0.130324	0.718096	-0.12962	-0.00515633	0.00282503	0.731966
Fads1	0.151126	7.91304	18.8846	1.38873e-05	-0.0317931	7.91304	0.835779	0.360607	-0.0471013	-0.00514231	1.47907e-05	0.38573
Fads6	-0.0477849	6.76657	0.968886	0.324958	-0.0437976	6.76657	0.813933	0.36696	0.0230954	-0.00981727	0.347739	0.392066
Fah	-0.934601	5.95561	113.396	1.76725e-26	-0.00751818	5.95561	0.00732597	0.931791	0.313386	0.00496685	0	0.934962
Fahd2a	0.394123	5.41006	16.8052	4.14202e-05	0.0298239	5.41006	0.0956321	0.757136	-0.130173	0.0134857	6.80373e-05	0.768869
Faim	-6.62693	5.75919	1037.78	1.10098e-227	0.117969	5.75919	0.242845	0.622159	0.980113	0.000900009	0	0.639876
Faim2	-0.00731032	9.01989	0.0658816	0.79743	-0.0266835	9.01989	0.878011	0.348747	0.00739663	-0.00322953	0.806753	0.373658
Fam101b	-0.135819	5.84165	4.29643	0.0381924	0.0413026	5.84165	0.397418	0.528426	0.0519186	0.0201286	0.0477503	0.549138
Fam102b	-0.157675	7.51259	16.4236	5.06499e-05	0.0339144	7.51259	0.759766	0.383402	0.0600993	0.0185323	7.69117e-05	0.407824
Fam103a1	-0.771661	7.19742	206.168	9.4179e-47	-0.0359559	7.19742	0.449088	0.502769	0.264927	-0.00503981	0	0.524807
Fam104a	-0.213174	6.05251	9.5538	0.00199536	0.0381197	6.05251	0.305434	0.580495	0.0782873	0.0199986	0.00307943	0.599488
Fam105a	-0.257507	5.64294	8.67256	0.00323037	-0.0383197	5.64294	0.191514	0.66166	0.0935853	-0.00561968	0.00486614	0.677731
Fam107a	-0.00556283	6.26052	0.0106613	0.917762	-0.0546275	6.26052	1.02962	0.310248	0.0052263	-0.0123525	0.921589	0.335371
Fam110a	0.537428	3.65912	3.85129	0.0497077	0.0923285	3.65912	0.107756	0.742714	-0.156935	0.0420092	0.0611004	0.755492
Fam114a2	-0.201429	4.76599	3.54152	0.0598505	-0.180794	4.76599	2.85393	0.091151	0.0714311	-0.0554515	0.0725041	0.107242
Fam117b	0.0657796	6.7484	1.46169	0.226661	-0.0693793	6.7484	1.62629	0.202217	-0.0151208	-0.0164857	0.249519	0.224887
Fam118a	0.07069	4.03101	0.412327	0.520791	0.0928113	4.03101	0.710677	0.399219	-0.0259648	0.0414259	0.540825	0.423328
Fam120b	0.0929295	4.78458	1.14057	0.285532	-0.0337429	4.78458	0.150606	0.697957	-0.0290499	-0.00810092	0.308931	0.712486
Fam129a	-0.39753	4.25138	13.2178	0.000277306	-0.141205	4.25138	1.66822	0.196497	0.137276	-0.0452249	0.000440763	0.218982
Fam131a	0.0888576	6.31564	2.08239	0.149007	-0.0315905	6.31564	0.263136	0.607974	-0.0246018	-0.00373549	0.168806	0.626017
Fam132a	0.689289	5.70817	72.4096	1.74857e-17	-0.0534977	5.70817	0.43546	0.509322	-0.227205	-0.013781	0	0.531099
Fam133b	0.0268028	7.40776	0.299515	0.584187	0.0353516	7.40776	0.520814	0.470494	-0.00474826	0.0175568	0.602109	0.49343
Fam134b	-2.28454	5.32157	683.452	1.1863e-150	0.0301482	5.32157	0.108332	0.742051	0.654386	0.0187252	0	0.754915
Fam135b	0.149417	5.64476	3.98105	0.0460149	-0.217228	5.64476	8.41197	0.00372759	-0.0475805	-0.06724	0.0568318	0.00542227
Fam136a	0.0683242	5.63757	1.06679	0.301672	-0.0230838	5.63757	0.121701	0.727197	-0.0149064	0.00109361	0.324943	0.740636
Fam13c	0.156625	5.56289	3.71596	0.0538946	0.00773384	5.56289	0.009076	0.924102	-0.0501861	0.00959094	0.065727	0.927517
Fam149b	0.000412992	5.29712	1.79355e-05	0.996621	-0.108132	5.29712	1.08561	0.297447	0.00483184	-0.0304966	0.996918	0.322588
Fam151a	-0.248801	6.25743	22.8873	1.71783e-06	-0.0281599	6.25743	0.292962	0.588328	0.0909358	-0.00315462	0	0.607156
Fam151b	0.200377	5.27349	3.13721	0.0765248	-0.00166615	5.27349	0.000208905	0.988468	-0.0628607	0.00641968	0.0910605	0.988925
Fam154b	0.0572259	5.07817	0.330211	0.565535	-0.0389166	5.07817	0.152666	0.696001	-0.0144014	-0.00715834	0.584337	0.7107
Fam160a2	-0.00671474	4.65319	0.00349756	0.95284	0.128663	4.65319	1.27429	0.258964	0.00798908	0.0535744	0.95516	0.283331
Fam160b1	-0.0517299	7.68345	1.75816	0.184854	0.0346177	7.68345	0.787287	0.374922	0.0233369	0.0176762	0.205955	0.399663
Fam161a	1.14895	3.39354	52.0167	5.50294e-13	-0.192381	3.39354	1.39335	0.23784	-0.361152	-0.0535745	0	0.26166
Fam162a	0.211306	4.83497	4.85768	0.0275233	0.0349164	4.83497	0.132824	0.715522	-0.0631767	0.0194667	0.0352492	0.72951
Fam163b	-0.236241	4.34474	5.58426	0.0181226	-0.0107714	4.34474	0.0116704	0.913972	0.0869425	0.00310886	0.0237983	0.91769
Fam166a	8.02574	4.23881	994.284	3.13798e-218	-0.633848	4.23881	3.97024	0.0463111	-0.996397	-0.00360327	0	0.0565212
Fam168a	-0.219892	8.0723	44.9734	1.99725e-11	-0.0468206	8.0723	2.03894	0.153317	0.0806888	-0.0100958	0	0.173773
Fam169a	0.196154	7.75525	24.6011	7.05114e-07	-0.0876541	7.75525	4.91278	0.0266587	-0.0629995	-0.0237881	0	0.0339269
Fam171a1	-0.0475976	3.73322	0.119423	0.729661	0.0142337	3.73322	0.0108623	0.916993	0.0203902	0.0152668	0.742059	0.920686
Fam171b	-0.0876195	10.6437	49.8595	1.65155e-12	-0.0151946	10.6437	1.49938	0.220767	0.0354718	0.000861082	0	0.244186
Fam172a	0.074717	4.57033	0.503731	0.477865	0.0269597	4.57033	0.0651212	0.798578	-0.0300349	0.00602853	0.49879	0.808561
Fam173b	1.21977	5.73707	257.045	7.56084e-58	-0.0116498	5.73707	0.0232591	0.878785	-0.391538	0.00341881	0	0.884624
Fam174b	0.246995	6.55206	17.283	3.22056e-05	-0.0601198	6.55206	1.02439	0.311481	-0.0806199	-0.0150698	5.02884e-05	0.336705
Fam179a	0.463594	4.9379	11.8048	0.000590795	-0.169695	4.9379	1.58697	0.20776	-0.144429	-0.0508414	0.000943647	0.230632
Fam179b	0.230352	5.97425	8.0793	0.00447738	-0.046698	5.97425	0.332011	0.564477	-0.0726095	-0.00785255	0.00657595	0.583745
Fam183b	-0.125956	4.26691	0.737361	0.390508	0.0049526	4.26691	0.00117403	0.972667	0.0504797	0.00701531	0.412948	0.974033
Fam184a	0.0892824	6.65792	2.08115	0.149128	-0.0802449	6.65792	1.68105	0.194785	-0.025466	-0.0216245	0.168934	0.217202
Fam189a1	-0.312831	4.03142	2.04448	0.15276	0.131987	4.03142	0.364322	0.546116	0.10672	0.0503611	0.172563	0.566304
Fam189a2	0.221025	5.40413	6.33833	0.0118156	-0.0222269	5.40413	0.0641677	0.800026	-0.0696071	-0.0014752	0.0159976	0.809854
Fam193a	0.240201	4.94418	6.42725	0.0112382	-0.0522001	4.94418	0.304407	0.581133	-0.0764616	-0.0134584	0.0152906	0.600104
Fam195a	-0.0461578	3.98013	0.054621	0.815209	-0.0127136	3.98013	0.00443126	0.946926	0.0138734	-0.0037392	0.823819	0.949315
Fam196a	-0.010009	4.12255	0.00725662	0.932114	-0.104297	4.12255	0.779103	0.377416	0.0126763	-0.0283788	0.935057	0.401988
Fam196b	-0.0663686	3.76638	0.286499	0.592473	-0.0176886	3.76638	0.0200774	0.887321	0.0353816	0.0104317	0.60991	0.892735
Fam19a2	0.395384	3.60015	5.51064	0.0189011	0.0551334	3.60015	0.109223	0.741031	-0.125172	0.0347521	0.0247005	0.753989
Fam20b	-0.0348872	6.20094	0.427288	0.513323	0.0309349	6.20094	0.336018	0.562137	0.0163883	0.0168102	0.533383	0.581526
Fam21	-0.0621676	7.65288	1.81266	0.178189	-0.00963199	7.65288	0.0435197	0.83475	0.0262988	0.00266758	0.198796	0.84258
Fam213a	0.129341	8.19978	7.37513	0.00661319	-0.0638471	8.19978	1.79749	0.180016	-0.0389706	-0.0157344	0.00938914	0.202
Fam213b	-0.852863	7.28295	350.788	2.85475e-78	0.00362672	7.28295	0.00640863	0.936194	0.290954	0.0069803	0	0.939118
Fam214a	0.00451701	5.40501	0.00279003	0.957875	-0.00224011	5.40501	0.000685581	0.979111	0.000794518	0.00334275	0.960038	0.980098
Fam216b	0.0810948	4.90864	0.849146	0.356794	-0.0918119	4.90864	1.08968	0.296542	-0.0180567	-0.0264291	0.379627	0.3216
Fam219a	-0.0182343	5.5242	0.0580114	0.809667	0.0326791	5.5242	0.186154	0.666137	0.0126598	0.0171565	0.818548	0.682062
Fam222b	0.175139	4.28648	2.57627	0.108477	-0.0502066	4.28648	0.210945	0.646028	-0.0505198	-0.0079065	0.12586	0.662719
Fam227b	2.21004	4.88601	432.628	4.35417e-96	-0.230203	4.88601	4.49662	0.0339618	-0.635729	-0.0469052	0	0.0421594
Fam228b	0.202293	4.38527	2.11109	0.146235	0.0418044	4.38527	0.0901544	0.763981	-0.0637662	0.0244715	0.165972	0.775373
Fam3c	0.202998	7.26642	17.81	2.44103e-05	-0.0347995	7.26642	0.523332	0.469424	-0.0644533	-0.0058683	3.54977e-05	0.492356
Fam43b	0.0996476	4.56793	1.13756	0.286169	0.034936	4.56793	0.139885	0.708395	-0.0290287	0.0170332	0.30957	0.722621
Fam45a	5.1163	4.21759	484.724	2.00328e-107	-0.806498	4.21759	9.82627	0.00172037	-0.935122	-0.0315616	0	0.00259725
Fam46a	-0.0337766	5.34608	0.171953	0.678382	-0.0305906	5.34608	0.141261	0.707031	0.014124	-0.00471678	0.692758	0.721293
Fam49a	-0.0760436	8.25756	4.53488	0.0332108	-0.0243463	8.25756	0.464883	0.495351	0.0316118	-0.00256127	0.0419701	0.517317
Fam53a	-0.109205	4.45961	0.614578	0.433069	0.0205564	4.45961	0.0216986	0.882892	0.0397212	0.0120305	0.454811	0.888487
[truncated: 4,762 more rows]

## Sheet: HYP_HighFat
genes	AG_logFC	AG_logCPM	AG_LR	AG_pval	PO_logFC	PO_logCPM	PO_LR	PO_pval	AGE	POE	AG_adj_pval	PO_adj_pval
0610009B22Rik	0.0607083	6.16437	0.316154	0.573928	-0.171676	6.16437	2.52781	0.111856	-0.0161558	-0.0524267	0.595953	0.133796
0610009O20Rik	-0.0848958	7.24333	1.37468	0.241009	-0.0308565	7.24333	0.181507	0.670082	0.0346908	-0.00374728	0.268985	0.687396
0610010K14Rik	-0.261766	5.58866	4.23357	0.0396319	-0.0909643	5.58866	0.511771	0.474373	0.095934	-0.0252281	0.0508914	0.498694
1110002L01Rik	-0.494368	3.27187	3.22204	0.0726528	0.0809728	3.27187	0.0906759	0.76332	0.176916	0.0360091	0.0896875	0.776268
1110004E09Rik	-0.0260878	6.74966	0.0831742	0.773041	-0.110171	6.74966	1.48217	0.223435	0.0147094	-0.0311249	0.786027	0.251205
1110008F13Rik	-0.115585	7.62267	3.05304	0.0805863	-0.0056434	7.62267	0.00727953	0.932007	0.0453184	0.0045737	0.0984636	0.93548
1110008J03Rik	-0.212095	3.34627	1.04813	0.305937	0.196358	3.34627	0.899459	0.342927	0.0815215	0.0872067	0.333741	0.370674
1110032A03Rik	0.470301	6.92868	26.0492	3.32826e-07	0.00531522	6.92868	0.00336706	0.953728	-0.156813	0.00882693	0	0.956029
1110035H17Rik	0.436598	4.27684	4.7667	0.0290154	-0.186905	4.27684	0.868097	0.351483	-0.149785	-0.0488493	0.0382893	0.379333
1110038B12Rik	-0.0603484	5.13289	0.209638	0.647052	-0.0294531	5.13289	0.0498957	0.823245	0.0288398	-0.00367482	0.666515	0.833163
1110057K04Rik	-0.105216	6.84173	1.4996	0.220733	0.0435585	6.84173	0.256995	0.612192	0.0409401	0.0215595	0.248258	0.631474
1110059E24Rik	-0.100391	6.70471	1.20428	0.272469	-0.175477	6.70471	3.67885	0.0551069	0.039337	-0.0546184	0.301005	0.0697827
1110059G10Rik	-0.166333	4.52537	1.14979	0.283594	0.14803	4.52537	0.910273	0.340042	0.0600797	0.0541468	0.311839	0.367768
1190002N15Rik	0.129717	7.25763	3.89049	0.0485602	-0.00317748	7.25763	0.00233014	0.9615	-0.0399952	0.00541259	0.0612918	0.963338
1200014J11Rik	-0.00925958	4.38936	0.00342637	0.953322	-0.324178	4.38936	4.08486	0.0432691	0.0156757	-0.106022	0.95614	0.0558818
1500009C09Rik	-0.556781	9.19011	233.547	1.00416e-52	-0.00492739	9.19011	0.0183255	0.892318	0.195119	0.00416569	0	0.898989
1500011B03Rik	0.295661	5.42244	7.64781	0.00568413	0.00626982	5.42244	0.00351142	0.952747	-0.0949359	0.00955867	0.00848078	0.955062
1500011K16Rik	-0.585899	4.83638	17.9817	2.23034e-05	0.326115	4.83638	5.55543	0.0184235	0.205518	0.114823	5.3697e-05	0.0251839
1500016L03Rik	0.0314534	3.61094	0.00105484	0.974091	1.13005	3.61094	2.77128	0.0959692	-0.0241707	0.280848	0.975568	0.11617
1600012H06Rik	-0.234317	4.07082	2.29426	0.129853	0.0732992	4.07082	0.224587	0.635567	0.0808956	0.0388532	0.151936	0.654305
1600014C10Rik	-0.270748	6.67223	9.32388	0.00226186	-0.0159328	6.67223	0.0323045	0.857361	0.0963716	0.00156369	0.003544	0.865623
1700003E16Rik	-0.11377	3.37181	0.196181	0.657821	-0.0422456	3.37181	0.0276191	0.868007	0.0458014	-0.0111695	0.676875	0.875852
1700003M02Rik	-0.0427957	4.38089	0.0412912	0.838977	-0.0675373	4.38089	0.104055	0.747017	0.0176243	-0.0217073	0.848732	0.760555
1700003M07Rik	-0.103338	3.63191	0.201457	0.653547	-0.0465456	3.63191	0.0401308	0.841225	0.0446721	-0.00347619	0.672878	0.850471
1700006P19Rik	-0.18433	6.18503	3.2233	0.0725971	-0.0589855	6.18503	0.330048	0.565631	0.0688423	-0.0138888	0.0896338	0.587459
1700012B09Rik	-0.173668	3.82588	0.687299	0.407085	-0.0707427	3.82588	0.115647	0.733805	0.0603924	-0.0185227	0.434161	0.748134
1700012B15Rik	0.113074	6.65739	1.40509	0.235873	0.0674114	6.65739	0.499635	0.479661	-0.0339982	0.0314197	0.263619	0.503739
1700016P03Rik	0.168894	3.80676	0.644185	0.422199	0.164586	3.80676	0.61183	0.434099	-0.053443	0.0644231	0.44889	0.459798
1700019D03Rik	-1.87122	4.93166	170.734	5.11456e-39	0.0698275	4.93166	0.232171	0.629918	0.577362	0.0167532	0	0.648687
1700020I14Rik	0.111599	10.5797	19.5662	9.71737e-06	-0.0206096	10.5797	0.667367	0.413971	-0.03353	-0.000464285	2.01364e-05	0.440111
1700021K19Rik	-0.0243447	8.88093	0.25268	0.615194	-0.00330679	8.88093	0.00466254	0.945561	0.0132266	0.00565276	0.636038	0.948575
1700022I11Rik	0.35371	7.72945	44.8766	2.09851e-11	-0.00774119	7.72945	0.0214816	0.883475	-0.117621	0.00381099	0	0.890468
1700025G04Rik	0.203788	8.66743	18.9965	1.3096e-05	0.0216581	8.66743	0.214617	0.643173	-0.0654484	0.014033	3.69167e-05	0.661732
1700026D08Rik	0.547689	4.39392	9.29568	0.00229695	-0.204784	4.39392	1.30707	0.252927	-0.187428	-0.0620165	0.00359099	0.280893
1700028K03Rik	0.112784	6.85694	2.03613	0.1536	-0.0857585	6.85694	1.17756	0.277854	-0.0330738	-0.023678	0.177475	0.306224
1700028P14Rik	-0.50658	3.98263	6.02575	0.0140986	-0.226311	3.98263	1.19087	0.275155	0.184875	-0.0622961	0.0194283	0.303613
1700030J22Rik	0.199837	4.5778	1.88242	0.170059	0.171679	4.5778	1.38918	0.238543	-0.0645706	0.0659782	0.195058	0.266223
1700034J05Rik	0.202554	3.21565	0.927693	0.335463	-0.0846979	3.21565	0.161268	0.687992	-0.0578065	-0.013957	0.363368	0.704438
1700049G17Rik	0.156453	5.89027	1.18815	0.275704	-0.0645035	5.89027	0.202286	0.652882	-0.0491522	-0.0170283	0.304291	0.67084
1700058G18Rik	-0.28163	5.43635	6.99613	0.00816862	-0.129482	5.43635	1.47842	0.224022	0.100977	-0.038888	0.0116455	0.251745
1700066M21Rik	-0.287149	5.21136	7.45359	0.00633101	0.0426332	5.21136	0.164107	0.685403	0.103226	0.0211857	0.00927281	0.702038
1700086D15Rik	-0.162765	4.84566	1.09978	0.294315	0.0372349	4.84566	0.0575694	0.81038	0.0627119	0.0183191	0.322461	0.821142
1700110K17Rik	-0.41199	3.71612	3.62177	0.0570282	0.037686	3.71612	0.0292396	0.864227	0.150461	0.017858	0.0714406	0.872362
1700121F15Rik	0.140197	4.5893	0.727678	0.393637	-0.088386	4.5893	0.289531	0.590521	-0.0431577	-0.0255833	0.421055	0.611039
1700123O20Rik	0.308822	4.84183	6.36958	0.0116093	0.0853114	4.84183	0.485084	0.486129	-0.103124	0.0367949	0.0161829	0.510216
1810009N23Rik	0.726953	3.80113	21.3401	3.84597e-06	0.0391196	3.80113	0.0620203	0.803331	-0.237721	0.0226029	1.34243e-05	0.814581
1810032O08Rik	-0.696658	3.6189	9.64471	0.00189898	-0.292748	3.6189	1.6891	0.193719	0.235456	-0.0927321	0.00300032	0.220913
1810037I17Rik	0.330295	7.6978	33.2445	8.12696e-09	-0.0715793	7.6978	1.56157	0.211435	-0.10963	-0.0175691	0	0.238915
1810058I24Rik	-0.677206	4.56038	23.0626	1.56814e-06	0.008723	4.56038	0.00393448	0.949985	0.228198	0.013777	3.35607e-06	0.952632
1810058N05Rik	0.102704	4.41908	0.507382	0.476274	0.2234	4.41908	2.39926	0.121393	-0.0284804	0.0828426	0.501839	0.144012
1810062O18Rik	0.158276	4.40422	0.344227	0.5574	0.223259	4.40422	0.683816	0.408276	-0.0405361	0.0660113	0.580237	0.43462
2010015L04Rik	-1.02765	4.67081	26.1891	3.0956e-07	0.172356	4.67081	0.740165	0.389608	0.32726	0.0536325	0	0.416303
2010107G23Rik	-0.00700652	6.31994	0.00603875	0.938059	0.0414719	6.31994	0.2114	0.645672	0.00759088	0.0199188	0.941846	0.663904
2010300C02Rik	-0.007494	4.39709	0.00249733	0.960144	-0.174721	4.39709	1.34209	0.246665	0.00133167	-0.0445615	0.962533	0.274489
2210015D19Rik	0.148959	5.69872	1.63061	0.201619	-0.0582867	5.69872	0.249538	0.6174	-0.0468983	-0.0127651	0.228313	0.636666
2210018M11Rik	-0.38889	4.34621	4.18803	0.0407104	-0.319391	4.34621	2.83255	0.0923718	0.128877	-0.106718	0.0521465	0.111925
2210408I21Rik	0.226508	5.53645	3.55089	0.0595135	-0.101987	5.53645	0.720044	0.396129	-0.0716998	-0.0292962	0.0741959	0.422602
2210411M09Rik	0.327715	3.84577	4.1167	0.0424618	-0.108917	3.84577	0.455742	0.499621	-0.102735	-0.0350847	0.0542072	0.523486
2310039H08Rik	-0.0584717	3.76672	0.0869812	0.768051	-0.0845642	3.76672	0.182642	0.669113	0.0172939	-0.0193973	0.781315	0.68648
2310047M10Rik	0.0809831	5.33284	0.554674	0.456414	-0.0325283	5.33284	0.0894473	0.764881	-0.0238789	-0.0037305	0.482357	0.777852
2310058D17Rik	0.857844	4.14751	29.7886	4.81828e-08	0.159027	4.14751	1.01528	0.313641	-0.283831	0.0592758	0	0.341805
2310061I04Rik	-0.0904803	6.16167	0.931385	0.334503	-0.021014	6.16167	0.0502545	0.822621	0.03612	-0.000510758	0.362364	0.832583
2410002F23Rik	-1.59693	8.14125	740.755	4.10881e-163	-0.0746829	8.14125	1.63761	0.200653	0.506208	-0.0148038	0	0.227947
2410004N09Rik	0.28446	5.09513	4.06249	0.0438458	-0.0148806	5.09513	0.011125	0.915999	-0.0893328	0.0055176	0.0557778	0.920572
2410127L17Rik	-0.776877	4.09744	12.697	0.000366239	-0.414364	4.09744	3.60006	0.0577776	0.254375	-0.119262	0.000664501	0.0727998
2410131K14Rik	-0.48857	6.79478	35.5806	2.44709e-09	0.00923862	6.79478	0.01271	0.910238	0.171924	0.0097366	0	0.915441
2510009E07Rik	0.18809	6.63488	5.00942	0.0252098	-0.163363	6.63488	3.77862	0.0519113	-0.0596751	-0.0492013	0.0335472	0.0660709
2610002J02Rik	0.461235	5.06296	14.6384	0.000130236	0.0771606	5.06296	0.409324	0.522313	-0.152006	0.0300007	0.000281909	0.545592
2610017I09Rik	1.34932	3.14624	9.15127	0.00248545	-0.481154	3.14624	1.17952	0.277454	-0.375473	-0.0994807	0.00385612	0.305858
2610019F03Rik	-0.529393	6.62952	34.482	4.30211e-09	-0.0947185	6.62952	1.10494	0.293184	0.185296	-0.0245132	0	0.321545
2610035D17Rik	0.480302	5.58294	14.973	0.000109061	0.0472519	5.58294	0.144613	0.703738	-0.159582	0.0203468	0.000231568	0.719668
2610035F20Rik	-0.435226	3.2706	3.11301	0.0776694	0.316981	3.2706	1.65113	0.198805	0.144745	0.111398	0.0950773	0.226101
2610044O15Rik8	0.190809	4.92627	1.6182	0.203342	-0.0748369	4.92627	0.247622	0.618754	-0.071401	-0.0123844	0.229954	0.637827
2610203C20Rik	2.61976	4.79186	201.327	1.07232e-45	0.0948294	4.79186	0.254029	0.614252	-0.705946	0.00146199	0	0.633518
2610206C17Rik	-1.00145	3.19979	18.8434	1.419e-05	-0.433007	3.19979	3.4688	0.0625367	0.336668	-0.130004	3.69167e-05	0.0781829
2610301B20Rik	-0.0920362	7.20955	1.8956	0.168572	-0.187212	7.20955	7.84197	0.00510468	0.0361267	-0.0577134	0.193628	0.00766525
2610507B11Rik	0.131622	8.04134	5.3149	0.0211438	0.00446528	8.04134	0.00612143	0.937637	-0.0402176	0.00859394	0.0285568	0.940661
2610524H06Rik	-0.23547	4.04109	1.68884	0.193754	0.0424299	4.04109	0.0545822	0.815274	0.0867515	0.0164296	0.219822	0.82572
2700060E02Rik	-0.0762025	8.29723	1.75666	0.185042	-0.0371877	8.29723	0.418376	0.517749	0.0306612	-0.00630832	0.210758	0.541088
2700062C07Rik	-9.67166	5.18993	947.614	4.37982e-208	-0.0142955	5.18993	7.57009e-11	0.999993	1	0	0	0.999762
2700089E24Rik	-0.149994	9.60303	18.0531	2.14823e-05	-0.0273066	9.60303	0.59849	0.439155	0.0567281	-0.00296597	5.3697e-05	0.464614
2700097O09Rik	0.236309	4.30459	1.86415	0.172146	0.183181	4.30459	1.12324	0.289222	-0.0704016	0.0760359	0.197212	0.317729
2810001G20Rik	0.451291	3.26668	2.45596	0.117079	-0.25448	3.26668	0.779898	0.377172	-0.141143	-0.0652769	0.138605	0.40409
2810021J22Rik	0.0340089	5.09975	0.0725828	0.787613	0.0114525	5.09975	0.00825342	0.927613	-0.00581802	0.0121015	0.799861	0.931328
2810025M15Rik	-2.31951	6.24283	289.556	6.21275e-65	-0.0685964	6.24283	0.258543	0.611123	0.663209	-0.0124859	0	0.630413
2810032G03Rik	-0.355849	4.88728	6.11028	0.0134398	-0.0989565	4.88728	0.471147	0.49246	0.130245	-0.0255099	0.0185389	0.516257
2810055G20Rik	0.483295	4.12231	5.09401	0.0240086	-0.00756523	4.12231	0.00125029	0.971793	-0.159246	-0.00206373	0.0320269	0.973145
2810403A07Rik	-0.349578	5.51609	7.3207	0.0068165	0.164388	5.51609	1.62066	0.203	0.118737	0.0626955	0.00997423	0.230384
2810408M09Rik	-0.299761	3.76889	2.74663	0.0974599	0.156305	3.76889	0.747199	0.387364	0.103735	0.0625761	0.117328	0.414202
2900097C17Rik	0.234638	8.75675	39.7573	2.87564e-10	-0.0082075	8.75675	0.0486458	0.825437	-0.0762716	0.00335116	0	0.835348
3010026O09Rik	-0.0423672	4.24812	0.0450935	0.831832	0.263253	4.24812	1.72678	0.188822	0.017596	0.0919971	0.841859	0.215731
3110001D03Rik	0.028607	5.1995	0.0569395	0.8114	0.0176128	5.1995	0.0216442	0.883038	-0.00160696	0.0139769	0.822702	0.890045
3110002H16Rik	0.118449	5.62481	1.04969	0.305578	0.031619	5.62481	0.0747116	0.784596	-0.0359838	0.0156326	0.333402	0.796602
3110040N11Rik	-0.531735	4.87654	11.3964	0.000735879	0.0517418	4.87654	0.107317	0.74322	0.18508	0.0233896	0.00127195	0.756991
3110043O21Rik	0.361762	7.84823	48.315	3.62964e-12	-0.0395669	7.84823	0.578129	0.447047	-0.119647	-0.00671611	0	0.472252
3110047P20Rik	0.0489098	3.45384	0.047957	0.826657	-0.275372	3.45384	1.47987	0.223794	-0.0174895	-0.0827805	0.836731	0.251517
3110052M02Rik	-0.462157	4.19629	4.97711	0.0256849	0.260815	4.19629	1.58157	0.208535	0.151382	0.0792543	0.0340976	0.235998
3110053B16Rik	-1.76893	3.7294	13.6407	0.000221335	0.335795	3.7294	0.560562	0.454034	0.494647	0.0964457	0.000419508	0.478699
3110056K07Rik	-0.209255	6.94345	7.53311	0.00605752	-0.102806	6.94345	1.81854	0.177487	0.0765505	-0.0291903	0.00896405	0.203643
3110082I17Rik	0.200526	4.66337	1.78849	0.18111	0.191709	4.66337	1.63429	0.201111	-0.0660006	0.0735486	0.206848	0.22838
3300002A11Rik	0.750453	4.28368	11.0597	0.000882247	0.113909	4.28368	0.259842	0.610229	-0.237572	0.0489474	0.00147667	0.629564
3632451O06Rik	-0.926902	7.8727	256.184	1.16501e-57	-0.0837857	7.8727	2.0986	0.147434	0.314748	-0.0199835	0	0.172388
4430402I18Rik	0.844382	3.69405	15.8369	6.90425e-05	0.328955	3.69405	2.40749	0.120756	-0.284787	0.115326	0.000130887	0.14327
4632415L05Rik	0.574663	5.45496	29.5345	5.49298e-08	-0.0178149	5.45496	0.028352	0.866284	-0.193272	0.00259328	0	0.874299
4632427E13Rik	-0.00433352	5.96452	0.00210751	0.963384	-0.0825024	5.96452	0.753334	0.385423	0.00951719	-0.0192749	0.965439	0.412242
4632428N05Rik	-0.175035	6.27785	3.45301	0.0631367	0.184436	6.27785	3.83382	0.0502285	0.0655748	0.0705442	0.0784614	0.0641881
4833420G17Rik	-1.95785	7.4572	577.183	1.53789e-127	0.224326	7.4572	7.72116	0.00545774	0.588754	0.0568362	0	0.00817537
4833422C13Rik	-0.284775	6.04517	6.14003	0.0132155	0.0344358	6.04517	0.0897828	0.764453	0.101368	0.0194972	0.0182503	0.777463
4833423E24Rik	0.0877727	3.79913	0.0998934	0.751958	0.021638	3.79913	0.00552387	0.940754	-0.0331339	0.00112496	0.766532	0.943776
4921534H16Rik	-0.398313	5.33769	10.1963	0.00140726	-0.185128	5.33769	2.20243	0.137793	0.143212	-0.0557586	0.00228884	0.161709
4922501C03Rik	-0.246123	6.64059	6.64948	0.00991847	-0.0334612	6.64059	0.122954	0.725853	0.0893847	-0.00417695	0.0139545	0.740838
4930404I05Rik	0.0448128	4.65049	0.105065	0.745834	0.0449951	4.65049	0.105824	0.74495	-0.0122481	0.020955	0.760723	0.758632
4930405A21Rik	-0.136356	5.35347	0.985318	0.320889	0.269506	5.35347	3.85961	0.0494619	0.0462911	0.102521	0.348917	0.0632383
4930417H01Rik	-0.120335	4.32361	0.45594	0.499528	0.186594	4.32361	1.09729	0.294862	0.0460223	0.0739746	0.524432	0.323176
4930418C01Rik	0.283916	3.3291	1.23236	0.266949	-0.0669967	3.3291	0.0669623	0.795812	-0.0861857	-0.0220261	0.295226	0.807359
4930422G04Rik	-0.00181554	5.03739	0.000193979	0.988888	0.152249	5.03739	1.36785	0.242181	0.0026774	0.0624081	0.989667	0.269871
4930423O20Rik	0.281551	3.26897	1.98411	0.158958	-0.0637225	3.26897	0.0990274	0.753	-0.0902363	-0.0193429	0.183164	0.76626
4930430F08Rik	0.20435	5.80921	2.97684	0.084464	0.0367334	5.80921	0.0959714	0.756719	-0.0672445	0.0161883	0.102967	0.769995
4930432K21Rik	-0.442395	4.4086	4.29968	0.0381194	0.0112011	4.4086	0.00273492	0.958292	0.153702	0.00894372	0.0490925	0.960318
4930441O14Rik	0.938702	3.22517	15.7295	7.30761e-05	0.200137	3.22517	0.691807	0.40555	-0.309182	0.0715634	0.000140955	0.432073
4930447A16Rik	0.217455	8.5893	14.335	0.000152996	-0.0622676	8.5893	1.17608	0.278156	-0.0704521	-0.0156867	0.000305402	0.30656
4930447C04Rik	1.12922	3.96933	18.625	1.59124e-05	0.0862972	3.96933	0.109488	0.740728	-0.336267	0.0293926	4.02728e-05	0.754672
4930451G09Rik	0.929158	5.13565	46.1909	1.07273e-11	-0.0320547	5.13565	0.0546953	0.815086	-0.302262	0.00187461	0	0.825458
4930469G21Rik	0.0755832	3.30281	0.122771	0.726048	-0.329862	3.30281	2.34581	0.12562	-0.0265128	-0.107381	0.741858	0.148657
4930500M09Rik	1.22862	3.96891	4.74801	0.0293323	0.365944	3.96891	0.407118	0.523436	-0.30113	0.100609	0.0386484	0.546673
4930503L19Rik	0.0789515	3.97341	0.180968	0.670543	0.000690881	3.97341	1.2259e-05	0.997206	-0.016787	0.00224851	0.688886	0.997355
4930506C21Rik	0.440401	7.59807	57.1131	4.11452e-14	0.0782066	7.59807	1.8019	0.179483	-0.146486	0.0333544	0	0.2057
4930506M07Rik	-0.113485	6.52319	1.42233	0.23302	-0.0866533	6.52319	0.829353	0.36246	0.0437475	-0.0231698	0.26078	0.3897
4930512B01Rik	0.37676	4.97047	8.59986	0.00336189	-0.0761726	4.97047	0.351583	0.553218	-0.122352	-0.0221646	0.0051482	0.575293
4930518I15Rik	-0.547152	3.07235	6.27132	0.0122707	0.417087	3.07235	3.64716	0.0561649	0.18298	0.14291	0.0170589	0.0709506
4930529M08Rik	-0.593661	4.20133	6.90508	0.00859511	0.138866	4.20133	0.380967	0.537086	0.198483	0.0570854	0.0122429	0.559835
4930539E08Rik	-1.66256	4.77579	90.8822	1.52485e-21	-0.0372735	4.77579	0.0450071	0.831991	0.518397	0.00113893	0	0.841634
4930558J22Rik	-0.287001	5.16369	5.92248	0.0149489	0.00489622	5.16369	0.00176239	0.966514	0.103204	0.0132736	0.0205425	0.968171
4930563E22Rik	0.164405	3.22616	0.362476	0.547134	0.211901	3.22616	0.604708	0.436787	-0.0490934	0.0814387	0.570467	0.462389
4930579G18Rik	0.0994784	3.70002	0.218393	0.640267	0.225224	3.70002	1.11784	0.290384	-0.0354125	0.0819005	0.660229	0.318907
4930579O11Rik	0.102725	5.01148	0.591135	0.441981	8.7367e-05	5.01148	5.97398e-07	0.999383	-0.0228549	0.00906811	0.46802	0.999382
4930581F22Rik	-0.0242657	5.39703	0.0410281	0.839484	-0.131563	5.39703	1.20448	0.272428	0.0148233	-0.0402617	0.849219	0.30073
4930586N03Rik	-2.1807	4.05849	128.437	9.00772e-30	-0.208654	4.05849	1.12019	0.289878	0.642071	-0.0435484	0	0.31845
4931406P16Rik	0.020682	8.17025	0.208909	0.647624	0.0784812	8.17025	3.00833	0.0828376	-0.00201686	0.0331552	0.667031	0.101068
4931415C17Rik	-1.1988	3.31806	37.5957	8.70382e-10	-0.165463	3.31806	0.714765	0.397866	0.403667	-0.0469405	0	0.424314
4931422A03Rik	-0.15172	5.29361	1.80476	0.179138	-0.0458693	5.29361	0.164937	0.684652	0.0553282	-0.0084598	0.20478	0.70127
4932411E22Rik	-0.186916	5.28713	3.05013	0.0807305	-0.0861436	5.28713	0.647548	0.420991	0.0701072	-0.0213447	0.098628	0.446897
4932438A13Rik	-0.152475	9.1907	15.17	9.82544e-05	0.00459191	9.1907	0.0137578	0.906627	0.057779	0.00804395	0.000198008	0.912192
4932438H23Rik	0.353817	3.64257	4.0015	0.0454597	0.077616	3.64257	0.193325	0.660163	-0.132274	0.0222647	0.0575599	0.677979
4932442E05Rik	-0.114624	4.11751	0.453111	0.500861	0.132187	4.11751	0.60396	0.437071	0.0484198	0.0646528	0.525775	0.462657
4932443I19Rik	0.39548	3.52065	2.90181	0.0884799	0.887434	3.52065	14.714	0.000125115	-0.122226	0.302175	0.107522	0.000208076
4932702P03Rik	-0.274745	6.23007	7.0857	0.00777017	-0.140818	6.23007	1.86176	0.172422	0.0987654	-0.0417063	0.0111925	0.198296
4933406I18Rik	-1.51612	4.44582	53.9352	2.07208e-13	-0.0888948	4.44582	0.186486	0.665857	0.470649	-0.0094642	0	0.683396
4933407E24Rik	0.954917	3.27117	7.24877	0.00709496	0.0822742	3.27117	0.0607869	0.805257	-0.301719	0.021212	0.0103837	0.816349
4933413G19Rik	-0.647334	3.58772	7.57259	0.00592627	-0.152642	3.58772	0.420181	0.516847	0.219199	-0.0381328	0.00880967	0.540333
4933415D12Rik	0.24852	3.57777	1.22606	0.268175	0.368023	3.57777	2.7006	0.100311	-0.0750265	0.130799	0.296471	0.120943
4933421O10Rik	-0.324868	4.01891	2.6781	0.101737	-0.0799726	4.01891	0.16271	0.686673	0.107104	-0.021037	0.121832	0.7032
4933426D04Rik	0.501425	4.70196	3.90533	0.0481333	-0.139722	4.70196	0.306615	0.579765	-0.160403	-0.0452653	0.0607884	0.600961
4933427D14Rik	0.104688	6.00737	0.994168	0.318726	0.0266262	6.00737	0.0643529	0.799744	-0.0344945	0.0182604	0.346577	0.811221
4933431E20Rik	-0.0487559	5.67022	0.183521	0.668365	-0.0834152	5.67022	0.536889	0.463725	0.0224203	-0.0213877	0.686913	0.487905
4933439C10Rik	1.52717	3.43472	38.3883	5.79775e-10	0.365184	3.43472	2.15673	0.141947	-0.468205	0.103844	0	0.166451
5031439G07Rik	0.172278	9.4852	25.1421	5.32586e-07	-0.0317413	9.4852	0.85361	0.355533	-0.054851	-0.00437378	0	0.383172
5330417C22Rik	-0.20184	4.76107	2.20174	0.137855	-0.130771	4.76107	0.923841	0.336468	0.0730274	-0.0345785	0.160641	0.364096
5330438D12Rik	-0.687493	4.74209	19.012	1.29898e-05	-0.298435	4.74209	3.578	0.0585496	0.226005	-0.0871522	3.69167e-05	0.0736019
5430405H02Rik	-0.581973	5.16016	23.5245	1.23335e-06	0.0702192	5.16016	0.341066	0.559214	0.203227	0.0273766	3.35607e-06	0.581036
5430417L22Rik	0.232662	5.4235	3.88829	0.048624	-0.00738099	5.4235	0.00387778	0.950346	-0.0744768	0.0064122	0.0613589	0.952971
5730455P16Rik	0.0294322	5.65604	0.0800494	0.77723	0.0440808	5.65604	0.179977	0.671393	-0.00260221	0.026238	0.790001	0.688658
5830403M04Rik	-7.50782	5.00584	627.309	1.9231e-138	0.452551	5.00584	0.850681	0.35636	0.987396	0.00739583	0	0.383967
5830417I10Rik	-2.5946	6.8737	348.722	8.04382e-78	0.00286657	6.8737	0.000515439	0.981887	0.706735	0.000348988	0	0.982669
5830444B04Rik	-0.831883	3.43702	13.4264	0.000248104	-0.383003	3.43702	2.81644	0.0933032	0.278876	-0.111827	0.000469849	0.112979
5930412G12Rik	-0.530212	4.39058	6.84253	0.00890126	0.329491	4.39058	2.64789	0.103688	0.176164	0.11432	0.0126423	0.124765
6330403A02Rik	0.115611	10.0407	14.3825	0.000149186	-0.0364622	10.0407	1.43079	0.231636	-0.0352812	-0.00605753	0.000295334	0.259397
6330403K07Rik	0.67518	11.0722	360.739	1.94355e-80	-0.0580716	11.0722	2.68656	0.101198	-0.225386	-0.0126828	0	0.121993
6330408A02Rik	0.0136146	5.30102	0.0168378	0.896756	-0.120458	5.30102	1.31935	0.250709	-0.000816114	-0.0331523	0.903181	0.278651
6330416G13Rik	-0.0519578	5.18972	0.140837	0.70745	0.0591856	5.18972	0.182639	0.669115	0.0248595	0.0288922	0.724091	0.68648
6330549D23Rik	-0.462204	3.25244	5.49231	0.0191003	-0.0543741	3.25244	0.0747747	0.784508	0.1612	-0.00884672	0.0259424	0.796515
6430550D23Rik	-0.0669347	5.02335	0.205788	0.650089	-0.0117197	5.02335	0.00624797	0.936998	0.0315194	0.00402386	0.669458	0.940044
6820431F20Rik	0.508092	4.18651	5.46554	0.019395	0.11752	4.18651	0.294036	0.587645	-0.159177	0.0499029	0.0263552	0.608468
8430419L09Rik	0.491257	10.2226	261.574	7.78727e-59	-0.0481707	10.2226	2.52062	0.112367	-0.163831	-0.00986912	0	0.134327
8430427H17Rik	-0.301604	3.96529	2.3302	0.126886	0.294469	3.96529	2.22203	0.136054	0.103706	0.104209	0.148902	0.159859
9030025P20Rik	-2.65541	4.47	120.467	4.99987e-28	0.411395	4.47	2.91728	0.0876354	0.704402	0.0653331	0	0.106515
9030617O03Rik	-0.170048	5.44608	1.61978	0.203122	0.123447	5.44608	0.854673	0.355234	0.0615788	0.0518362	0.229709	0.38288
9130401M01Rik	-0.20502	5.78244	4.22917	0.039735	-0.106535	5.78244	1.14161	0.285313	0.0742822	-0.0313333	0.0509921	0.313933
9230112E08Rik	-0.0501358	4.47547	0.137461	0.710818	0.0699312	4.47547	0.267806	0.604807	0.0210792	0.0333442	0.727105	0.624641
9330101J02Rik	0.978656	3.76206	18.7327	1.50378e-05	0.0121658	3.76206	0.00365692	0.951779	-0.321776	0.00323058	3.69167e-05	0.954257
9330133O14Rik	-0.845983	4.42469	26.8983	2.14447e-07	-0.380079	4.42469	5.4205	0.0199017	0.274222	-0.103555	0	0.0270432
9330160F10Rik	0.0196926	4.8148	0.017386	0.895098	0.122502	4.8148	0.669946	0.41307	-0.00249075	0.0511789	0.901637	0.439242
9330162012Rik	0.250374	6.18781	6.84593	0.00888432	0.0248069	6.18781	0.0672453	0.795391	-0.0799895	0.0167606	0.0126289	0.806956
9330182L06Rik	0.186011	8.71497	15.0664	0.000103796	-0.0356989	8.71497	0.555067	0.456255	-0.0597119	-0.00558554	0.000224856	0.48085
9430008C03Rik	0.140197	4.45249	0.75342	0.385396	-0.0231345	4.45249	0.0205538	0.886001	-0.0469783	-0.00295986	0.413034	0.892921
9430015G10Rik	-0.555607	7.02755	43.1582	5.04874e-11	-0.0566303	7.02755	0.449328	0.502654	0.193193	-0.0126355	0	0.526389
9430016H08Rik	-0.631033	5.07162	28.5386	9.18511e-08	0.092672	5.07162	0.612416	0.43388	0.220384	0.0342489	0	0.459633
9430041J12Rik	-0.238954	7.65983	13.4183	0.000249182	-0.0359276	7.65983	0.303402	0.581757	0.087086	-0.00609103	0.000469849	0.602773
9630028B13Rik	-0.886446	3.33135	15.7608	7.18772e-05	0.297586	3.33135	1.78834	0.181129	0.289366	0.103311	0.000140955	0.207368
9630028H03Rik	0.181093	4.14313	1.42518	0.232552	-0.278693	4.14313	3.36867	0.0664473	-0.0662242	-0.0798725	0.260213	0.0826465
9630033F20Rik	0.526958	7.01003	44.6694	2.33279e-11	0.108082	7.01003	1.88169	0.170143	-0.174983	0.0422019	0	0.195987
9830147E19Rik	0.484993	4.52188	10.9152	0.00095376	0.0335204	4.52188	0.0527035	0.818424	-0.162174	0.0229399	0.00157735	0.828629
9930013L23Rik	-0.352731	3.85002	2.46496	0.116411	-0.196238	3.85002	0.757407	0.384141	0.129551	-0.0563055	0.137924	0.411004
A030009H04Rik	0.131925	8.37638	8.84753	0.00293486	-0.0513906	8.37638	1.34259	0.246578	-0.0411227	-0.0112161	0.00452733	0.274385
A130066N16Rik	-0.362857	3.67163	2.74184	0.0977522	0.5054	3.67163	5.32563	0.021014	0.119791	0.181372	0.11769	0.0284292
A230004M16Rik	0.0791079	6.73785	0.986311	0.320646	-0.0164669	6.73785	0.0427707	0.836158	-0.0217466	0.000433649	0.348608	0.845698
A230006K03Rik	-0.644608	6.07731	8.74582	0.00310312	5.50821	6.07731	839.518	1.38134e-184	0.0195212	0.951999	0.00479582	0
A230056P14Rik	-0.103919	6.95267	1.66607	0.196785	-0.0180049	6.95267	0.0500507	0.822975	0.0405089	-0.000473299	0.223121	0.832915
A2m	-0.396704	6.0558	12.1601	0.000488231	-0.204761	6.0558	3.24407	0.0716825	0.137052	-0.0658118	0.000865865	0.0884994
A330021E22Rik	-0.273352	6.14856	5.49445	0.019077	-0.188528	6.14856	2.61528	0.105839	0.0979927	-0.060168	0.0259021	0.127158
A330041J22Rik	-2.37135	3.53476	77.9612	1.05085e-18	0.304396	3.53476	1.22833	0.267732	0.654451	0.0653081	0	0.295995
A330050F15Rik	-0.216224	4.50825	2.44618	0.117811	-0.114725	4.50825	0.688397	0.40671	0.0823885	-0.0332887	0.139381	0.433144
A430005L14Rik	0.111066	4.62535	0.541536	0.461797	-0.0429974	4.62535	0.0809069	0.776072	-0.0313636	-0.000782431	0.487787	0.788558
A430105I19Rik	0.190293	5.98405	3.72618	0.0535658	-0.0541107	5.98405	0.301367	0.583026	-0.0597898	-0.0127475	0.0672018	0.603941
A530054K11Rik	-0.98849	5.96949	71.9159	2.24563e-17	0.119535	5.96949	1.05226	0.304988	0.332585	0.0401093	0	0.333157
A530058N18Rik	-1.52855	5.13164	71.4315	2.87055e-17	0.0862194	5.13164	0.228611	0.632556	0.475363	0.0274591	0	0.651291
A630007B06Rik	-0.165479	8.38573	13.5024	0.000238258	-0.0262938	8.38573	0.340948	0.559282	0.0625054	-0.00238104	0.000443001	0.581099
A730071L15Rik	0.090265	4.74023	0.495945	0.481287	-0.345997	4.74023	7.30422	0.00687928	-0.0264062	-0.112537	0.506611	0.0101487
A830010M20Rik	0.104347	7.92371	2.37935	0.122949	-0.0175334	7.92371	0.0671803	0.795487	-0.0301241	0.000606844	0.144663	0.807063
A830018L16Rik	0.22408	7.83666	14.1707	0.000166947	-0.0226477	7.83666	0.144735	0.703618	-0.0733319	-0.00134976	0.000338963	0.719574
A830073O21Rik	0.325172	4.85075	5.92194	0.0149535	-0.0351155	4.85075	0.0693419	0.792297	-0.102503	-0.0100446	0.0205525	0.803868
A830082K12Rik	-0.220284	6.16691	4.51917	0.0335171	0.0353773	6.16691	0.11655	0.732807	0.0805598	0.0204437	0.0435517	0.747204
A930005H10Rik	-0.274869	3.38498	1.17636	0.278099	-0.417012	3.38498	2.71446	0.0994427	0.0948459	-0.128232	0.306701	0.119979
A930012O16Rik	-0.507827	3.56326	5.74017	0.0165812	0.113149	3.56326	0.282742	0.594909	0.177111	0.04379	0.0227877	0.615227
A930015D03Rik	3.17944	4.6508	316.856	7.0087e-71	-0.222097	4.6508	1.38697	0.238918	-0.797192	-0.0274118	0	0.266626
A930017M01Rik	-0.205433	6.1909	4.37684	0.0364305	0.00297613	6.1909	0.000931129	0.975657	0.0749028	0.008751	0.0471091	0.976776
A930024E05Rik	0.329181	3.58193	2.08502	0.14875	0.049367	3.58193	0.0487467	0.825259	-0.0928297	0.031738	0.172274	0.83517
A930028C08Rik	0.0709192	6.26765	0.587852	0.443251	-0.0789445	6.26765	0.728296	0.393436	-0.0202072	-0.0203049	0.469322	0.419961
A930033H14Rik	-0.326467	3.03123	2.12792	0.144637	0.0797612	3.03123	0.125278	0.723379	0.117195	0.0346172	0.167877	0.738351
AA987161	-0.198852	4.3148	1.3252	0.249661	-0.142578	4.3148	0.680259	0.409498	0.0844078	-0.0437139	0.277698	0.435856
Aacs	0.0189499	5.59855	0.0191608	0.889907	-0.0841944	5.59855	0.376504	0.53948	-0.00505377	-0.0226259	0.896828	0.562101
Aaed1	-0.199308	4.11174	0.743004	0.3887	0.0703693	4.11174	0.0919191	0.761751	0.0680305	0.0208299	0.416216	0.774684
Aagab	0.182102	4.98007	1.92409	0.165407	0.0930811	4.98007	0.501242	0.478955	-0.0607819	0.0370617	0.190272	0.503078
Aak1	0.0785986	9.61376	3.56124	0.0591434	-0.109427	9.61376	6.90202	0.00860982	-0.0225061	-0.0310867	0.0738301	0.0124644
Aamp	-0.483801	7.15162	51.2273	8.2266e-13	-0.0648202	7.15162	0.920124	0.337442	0.16973	-0.0156145	0	0.36516
Aar2	-0.0402554	7.28463	0.277504	0.598342	-0.0571175	7.28463	0.558565	0.454839	0.0190418	-0.012915	0.619754	0.479521
Aard	-0.392214	3.09511	2.37791	0.123062	0.072666	3.09511	0.0812455	0.775617	0.136156	0.0313877	0.144774	0.788132
Aars2	0.16722	5.14666	1.08585	0.297394	0.135591	5.14666	0.714678	0.397895	-0.0501186	0.0530296	0.325508	0.424351
Aarsd1	-0.150672	6.29339	2.6064	0.106433	0.0622363	6.29339	0.444807	0.504812	0.0562592	0.0287065	0.127138	0.528523
Aasdh	-0.121218	4.86147	0.612578	0.433819	-0.0278445	4.86147	0.0320788	0.857855	0.0494173	0.000651709	0.460066	0.866133
Aasdhppt	6.14289	4.54478	450.273	6.29113e-100	-0.925454	4.54478	5.63647	0.0175906	-0.969125	-0.0197945	0	0.0241502
Aass	-0.8412	5.22115	27.7395	1.38803e-07	-0.0878382	5.22115	0.302859	0.582096	0.280678	-0.0165025	0	0.603041
Aatf	-0.118968	6.14513	0.844949	0.357985	-0.117433	6.14513	0.822898	0.364334	0.045639	-0.0332849	0.385921	0.391529
AB041806	0.311181	3.4745	2.16744	0.140961	-0.072686	3.4745	0.117283	0.732	-0.0993955	-0.0195902	0.163843	0.746443
Abca3	-0.274001	6.79108	10.06	0.0015152	0.0344102	6.79108	0.158658	0.690395	0.100186	0.0184955	0.00244322	0.706747
Abca4	-0.137402	4.45626	0.354811	0.551403	-0.125647	4.45626	0.298616	0.584751	0.0446686	-0.038778	0.574374	0.605729
Abca5	-0.064732	8.48476	1.81118	0.178366	-0.0535434	8.48476	1.23927	0.265611	0.0271373	-0.0123531	0.203898	0.293958
Abca6	-0.077765	4.92262	0.331043	0.565046	0.0858762	4.92262	0.403436	0.52532	0.0322027	0.0333255	0.587442	0.548529
Abca9	-0.0975662	2.95991	0.0883166	0.766328	0.284071	2.95991	0.753915	0.38524	0.0349205	0.100142	0.779762	0.412061
Abcb10	0.000706443	5.55909	2.67681e-05	0.995872	0.086495	5.55909	0.41329	0.520304	0.00510034	0.0363984	0.995993	0.543589
Abcb1a	-0.326631	7.40947	19.2308	1.15832e-05	0.030862	7.40947	0.171821	0.678498	0.116781	0.0176834	3.02046e-05	0.695357
Abcb1b	-2.5798	4.55905	119.005	1.0449e-27	0.360086	4.55905	2.35	0.125283	0.695005	0.0544302	0	0.148268
Abcb4	0.304411	5.30384	3.62829	0.0568052	-0.321447	5.30384	4.04121	0.0444019	-0.101001	-0.101651	0.0711419	0.0572645
Abcb6	0.0274639	5.5304	0.0250684	0.874197	0.0310175	5.5304	0.032099	0.857811	-0.00496003	0.0186945	0.881927	0.866056
Abcb8	0.249091	6.93124	7.98251	0.00472314	0.00341283	6.93124	0.0015054	0.96905	-0.0812804	0.00786656	0.00709137	0.970477
Abcc9	0.271451	6.56092	6.01387	0.0141939	-0.0157116	6.56092	0.0201721	0.887058	-0.0876155	0.0015722	0.0195625	0.893895
Abcd2	-0.0395548	7.35287	0.352888	0.552483	-0.00460408	7.35287	0.00477514	0.944908	0.0190827	0.00568008	0.575431	0.947921
Abcd3	-0.0399191	9.10039	0.806432	0.369177	0.0146593	9.10039	0.108749	0.741573	0.0186379	0.0115609	0.396999	0.755494
Abcf1	0.108791	5.88015	0.996488	0.318162	-0.0298811	5.88015	0.0751423	0.783992	-0.0332178	-0.00374968	0.346054	0.796039
Abcf2	-0.072861	7.47978	1.04451	0.306775	-0.0559711	7.47978	0.616577	0.432322	0.0288032	-0.0133649	0.334553	0.458133
Abcg1	0.101292	8.24557	4.43903	0.0351261	-0.081595	8.24557	2.88053	0.0896566	-0.030364	-0.0217567	0.045619	0.10872
Abcg4	-0.247753	6.08746	6.88066	0.00871332	0.0351796	6.08746	0.138883	0.709394	0.0891495	0.0185144	0.0123872	0.725158
Abhd10	1.21441	6.56126	175.486	4.68891e-40	-0.120879	6.56126	1.74664	0.1863	-0.391565	-0.0301415	0	0.213073
Abhd16a	0.0825277	7.27777	1.13255	0.287233	0.0663495	7.27777	0.731917	0.392263	-0.0243618	0.029059	0.315416	0.41883
Abhd17b	-0.061846	7.01766	0.787022	0.375002	-0.0377338	7.01766	0.292989	0.588312	0.0261277	-0.00627524	0.402741	0.609062
Abhd17c	0.259065	3.97539	1.59243	0.206979	0.0977513	3.97539	0.226914	0.633821	-0.0820638	0.0365615	0.233686	0.652516
Abhd2	-0.124808	7.34935	2.98847	0.0838594	-0.0600176	7.34935	0.691084	0.405796	0.0485107	-0.0139027	0.1023	0.432301
Abhd6	10.4701	5.96187	1304.16	1.40986e-285	-0.0537713	5.96187	1.06437e-10	0.999992	-1	0	0	0.999762
Abhd8	-0.85883	7.27128	2.9402	0.0864001	0.0283035	7.27128	0.00315133	0.955233	0.262956	0.0131766	0.105132	0.957455
Abi2	0.00898516	7.52366	0.0228565	0.879831	0.0465082	7.52366	0.612375	0.433895	0.0011811	0.0256552	0.887428	0.459647
Abi3bp	0.198159	4.54021	1.37943	0.240198	0.287384	4.54021	2.90127	0.0885096	-0.0615397	0.101857	0.268234	0.107461
Abl2	0.045061	4.56008	0.0881687	0.766518	-0.00290423	4.56008	0.000366908	0.984718	-0.00280624	0.00456901	0.779896	0.985425
Ablim1	0.130898	9.45046	11.8414	0.000579281	-0.080352	9.45046	4.46244	0.0346479	-0.0405905	-0.0214095	0.00102024	0.0453102
Ablim3	0.172151	7.49119	6.67645	0.0097695	-0.0219847	7.49119	0.1089	0.7414	-0.0545446	-0.00110763	0.0137632	0.755333
Abr	0.141076	9.64254	14.953	0.000110221	-0.0371871	9.64254	1.03914	0.308021	-0.044124	-0.00615706	0.000231568	0.336143
Abracl	-0.0316414	4.4529	0.0344151	0.852827	0.154845	4.4529	0.825331	0.363626	0.0198767	0.0586637	0.86166	0.390797
Abt1	0.0362544	5.262	0.121523	0.727388	-0.146667	5.262	1.98773	0.158578	-0.0087673	-0.0472243	0.74314	0.184104
Abtb1	-0.0939006	5.16184	0.625119	0.429151	0.0333498	5.16184	0.0786326	0.779159	0.0356319	0.00891561	0.455525	0.791508
Abtb2	0.0338576	3.87998	0.0428082	0.836087	0.159045	3.87998	0.945801	0.33079	-0.00444466	0.0774558	0.845836	0.358686
AC020971.1	0.359835	7.1682	19.3542	1.08577e-05	0.115513	7.1682	1.99624	0.15769	-0.11865	0.0464826	2.34925e-05	0.183127
AC025622.1	0.244966	5.02683	3.15597	0.0756498	-0.0786508	5.02683	0.325446	0.568353	-0.0766409	-0.0216752	0.0928724	0.589986
AC087901.1	0.0515011	5.63957	0.173903	0.676666	0.0328869	5.63957	0.0709266	0.789992	-0.0115116	0.0168862	0.694893	0.801576
AC098726.1	0.00304976	5.52619	0.000948949	0.975425	0.0341316	5.52619	0.11886	0.730274	0.00289781	0.0180389	0.976853	0.744885
AC099934.1	0.0251947	5.26581	0.0501239	0.822848	0.00694771	5.26581	0.00380138	0.950837	-0.00403786	0.00767239	0.83322	0.953388
AC100730.1	-0.499209	5.41185	5.14261	0.0233455	0.13596	5.41185	0.381828	0.536627	0.165221	0.0552446	0.0313222	0.559376
AC100751.1	-0.42965	3.86213	4.66397	0.0308019	-0.120454	3.86213	0.36478	0.545864	0.1444	-0.0279738	0.0404003	0.568299
AC102484.1	0.781757	3.4911	12.4703	0.000413484	0.3862	3.4911	3.02747	0.0818657	-0.250716	0.131793	0.00074169	0.099994
AC107641.1	-0.971616	6.96676	10.4405	0.00123283	6.75521	6.96676	477.637	6.98186e-106	0.0154942	0.975715	0.00204049	0
AC108401.1	-0.138538	3.56344	0.477608	0.489508	0.00463764	3.56344	0.000519	0.981825	0.0525451	0.0112299	0.514602	0.982612
AC108401.2	0.240791	4.4153	2.87681	0.0898637	0.0337859	4.4153	0.0563425	0.812373	-0.0755727	0.0209357	0.109075	0.822994
AC109197.1	0.396859	3.98073	4.48979	0.0340979	-0.083057	3.98073	0.199158	0.655401	-0.132038	-0.0275085	0.0442699	0.673347
AC120136.1	0.194821	3.98157	1.39949	0.236809	-0.170343	3.98157	1.07042	0.30085	-0.0588858	-0.0519543	0.264589	0.328874
AC120176.1	0.0945772	6.36857	1.045	0.306662	-0.109335	6.36857	1.39642	0.237324	-0.0285389	-0.0313378	0.334472	0.265005
AC121121.1	0.914686	3.70779	24.7783	6.43171e-07	0.156887	3.70779	0.719253	0.396389	-0.300474	0.0517028	0	0.422904
AC121292.1	10.5004	6.77018	1896	0	0.760467	6.77018	2.68713	0.101162	-0.999201	0.000798722	0	0.121956
AC121499.1	-0.779424	3.9357	20.131	7.2315e-06	0.00939486	3.9357	0.00263268	0.959079	0.262977	-0.0012566	1.67803e-05	0.961009
AC121821.1	0.243481	4.40387	2.03693	0.153519	0.0453048	4.40387	0.070747	0.790252	-0.0779793	0.0272169	0.177375	0.801821
AC122371.1	0.0308367	5.44325	0.0743712	0.785076	-0.0686669	5.44325	0.368549	0.543796	-0.00844712	-0.0194828	0.797428	0.566299
AC122487.1	0.82118	3.45423	14.7148	0.000125061	-0.164903	3.45423	0.584792	0.44444	-0.272466	-0.0463226	0.000271841	0.469832
AC124169.1	-0.0462578	3.65895	0.064429	0.799628	0.0770468	3.65895	0.178035	0.673067	0.0250612	0.0295544	0.811476	0.690171
AC124446.1	0.314204	3.25839	1.44471	0.229379	-0.0704134	3.25839	0.0755834	0.783374	-0.0982736	-0.012797	0.2569	0.795478
AC124500.1	-0.520493	4.42623	8.48802	0.00357493	-0.166954	4.42623	0.875825	0.349348	0.167867	-0.0515933	0.00547039	0.377141
AC125486.1	-0.300606	3.87234	4.25525	0.0391291	0.0774139	3.87234	0.281553	0.595685	0.112394	0.0337836	0.050294	0.615925
AC126026.1	-0.397738	3.41382	4.01905	0.044989	0.017819	3.41382	0.00829398	0.927436	0.136535	0.0151431	0.0570263	0.931177
AC127355.1	0.441695	4.18999	8.06023	0.00452473	-0.005121	4.18999	0.000958327	0.975304	-0.143437	0.00950937	0.00682959	0.976417
AC127595.1	-1.22018	4.18948	59.1006	1.49813e-14	0.0492284	4.18948	0.0937342	0.759483	0.405917	0.0254983	0	0.772677
AC129021.2	0.0830561	4.15444	0.223268	0.636561	-0.0570548	4.15444	0.105317	0.74554	-0.0251742	-0.0154987	0.65647	0.759206
AC129605.1	-0.185682	4.95402	2.24952	0.133656	0.0636441	4.95402	0.263319	0.607849	0.0758814	0.0262206	0.156091	0.627514
AC130214.1	1.29463	3.87974	41.0783	1.46255e-10	-0.0769594	3.87974	0.146869	0.701546	-0.406536	-0.0149703	0	0.717497
AC130216.1	0.17002	3.44141	0.656658	0.417742	0.407545	3.44141	3.77692	0.0519643	-0.0469138	0.142321	0.444591	0.0661279
AC131744.1	0.00938196	6.78248	0.00847708	0.926642	-0.200541	6.78248	3.87165	0.0491081	0.00149266	-0.0607639	0.931412	0.062792
AC131756.1	-2.91569	3.5981	68.5837	1.21608e-16	0.150295	3.5981	0.21229	0.644978	0.732034	0.0106761	0	0.663262
AC131759.1	-0.0953697	3.72933	0.221564	0.637851	-0.29768	3.72933	2.15119	0.14246	0.0418293	-0.0914144	0.657809	0.167005
AC131980.1	0.691642	3.65505	9.02375	0.00266494	-0.00897033	3.65505	0.00166765	0.967426	-0.229786	0.00601056	0.00411454	0.969017
AC132347.1	0.627061	5.00821	23.4364	1.29114e-06	0.0994616	5.00821	0.590592	0.44219	-0.205759	0.0407947	3.35607e-06	0.467574
AC133646.1	0.111904	4.11135	0.507353	0.476287	0.0267616	4.11135	0.0288695	0.865081	-0.0425091	0.0130442	0.501846	0.873235
AC134826.1	0.0617198	4.1519	0.126176	0.72243	-0.362297	4.1519	4.35432	0.0369153	-0.0107778	-0.108673	0.738281	0.0481495
AC136008.1	-0.454173	4.95332	9.71067	0.00183202	-0.00729896	4.95332	0.0025951	0.959372	0.159181	0.00702397	0.00290635	0.961251
AC136215.1	-0.16206	3.71453	0.567849	0.451115	-0.0910586	3.71453	0.18056	0.670892	0.0553885	-0.0380167	0.476954	0.688161
AC136976.1	2.17114	3.02997	42.056	8.86983e-11	-0.0868875	3.02997	0.0657558	0.79762	-0.612703	0.00224166	0	0.809141
AC137938.1	-0.156076	3.5089	0.448894	0.502861	-0.201394	3.5089	0.745263	0.38798	0.0564799	-0.0489942	0.527469	0.414749
AC138214.1	-0.0575443	4.81907	0.19961	0.655036	-0.159629	4.81907	1.53299	0.215665	0.0230897	-0.0476333	0.674294	0.243385
AC139063.1	0.659516	3.34319	8.82915	0.00296456	0.105555	3.34319	0.230527	0.631133	-0.210564	0.0336168	0.0045911	0.649858
AC140312.1	0.169194	5.77237	2.84882	0.0914411	-0.0970494	5.77237	0.937159	0.33301	-0.0521441	-0.0257248	0.110831	0.360918
AC140333.2	-0.325558	3.41342	2.58049	0.108188	-0.132653	3.41342	0.429974	0.512002	0.113942	-0.0432864	0.129064	0.535715
AC140392.1	0.0457592	7.12585	0.40036	0.526904	0.0925861	7.12585	1.63893	0.200473	-0.0105225	0.0377605	0.550757	0.227766
AC140416.1	0.270596	5.43156	4.87984	0.0271722	-0.0987713	5.43156	0.650462	0.419948	-0.0871277	-0.0314282	0.0359502	0.445766
AC141882.1	0.501073	4.16131	7.57264	0.00592611	0.0908445	4.16131	0.249532	0.617405	-0.164857	0.0385601	0.00880967	0.636666
AC144852.1	-0.00549194	4.29795	0.00136687	0.970508	-0.231023	4.29795	2.31282	0.128311	0.00858738	-0.0727672	0.972276	0.151546
AC147987.1	-1.30616	6.10468	154.545	1.7601e-35	0.12409	6.10468	1.39636	0.237334	0.426685	0.0385889	0	0.265012
AC149055.1	0.242879	5.75417	6.3829	0.0115225	0.177674	5.75417	3.41513	0.0646015	-0.078172	0.0668344	0.0160487	0.0805086
AC153506.1	-0.574083	6.07506	31.5606	1.93316e-08	-0.00985995	6.07506	0.00953019	0.922232	0.201855	0.00236022	0	0.926381
AC153801.1	-0.164545	4.2904	0.787503	0.374856	-0.124145	4.2904	0.448354	0.503118	0.0625403	-0.0380571	0.40263	0.526838
AC154200.1	-0.270122	3.79479	1.82108	0.177184	-0.184885	3.79479	0.854066	0.355405	0.0906934	-0.0506121	0.202549	0.383058
AC154486.1	-0.308565	4.31503	3.94497	0.0470118	-0.288927	4.31503	3.45294	0.0631392	0.117135	-0.0900528	0.0594326	0.0788977
AC154625.1	0.0229332	5.0477	0.0199031	0.887808	0.0409243	5.0477	0.0633365	0.801298	-0.00321785	0.0183829	0.89471	0.812628
AC154766.1	0.189365	3.76752	0.819494	0.365328	-0.0977363	3.76752	0.217646	0.64084	-0.0625665	-0.023474	0.393227	0.659591
AC154910.1	-0.00984316	5.11698	0.006099	0.937752	-0.0607505	5.11698	0.232722	0.629513	0.00751344	-0.0148096	0.941554	0.648341
AC158662.1	0.0565109	3.8344	0.0616233	0.803948	-0.353689	3.8344	2.38764	0.122298	-0.0187828	-0.118807	0.81548	0.144908
AC158993.1	-0.193826	5.93295	2.65956	0.102929	0.0414875	5.93295	0.121997	0.726879	0.0685639	0.0212311	0.123147	0.741653
AC158998.1	0.721018	4.94286	27.8384	1.31883e-07	0.0669712	4.94286	0.24011	0.624126	-0.240051	0.0276875	0	0.643089
AC159323.1	-0.04878	5.80665	0.238958	0.62496	-0.0536791	5.80665	0.289394	0.590609	0.0213151	-0.0116591	0.645348	0.611123
AC159891.1	-0.558727	3.55124	6.84798	0.00887413	0.226315	3.55124	1.13895	0.285875	0.187906	0.0774814	0.0126154	0.314473
AC161601.1	0.218533	6.61803	4.95556	0.0260069	-0.0520754	6.61803	0.2815	0.59572	-0.0715245	-0.0110551	0.0345373	0.615965
AC161602.1	0.0942104	6.66705	1.44009	0.230125	0.0738835	6.66705	0.885901	0.34659	-0.0274542	0.033222	0.257716	0.374393
AC163296.1	0.367038	4.48922	7.0494	0.00792918	-0.0378948	4.48922	0.075112	0.784034	-0.120381	-0.00877941	0.0113737	0.796082
AC163677.1	-0.197909	2.95	0.610501	0.434599	0.00356004	2.95	0.000197406	0.98879	0.0733434	0.00219901	0.460781	0.989146
AC163993.1	0.175325	6.1299	3.53948	0.0599243	-0.164019	6.1299	3.09675	0.0784487	-0.057616	-0.0495719	0.0747194	0.0962989
AC164431.1	-0.415066	5.24489	15.4768	8.35232e-05	-0.0121387	5.24489	0.0131821	0.908593	0.146071	0.00439097	0.000154379	0.913914
AC164612.1	0.220117	5.01007	3.20822	0.0732693	0.00506916	5.01007	0.00167652	0.967339	-0.0758389	0.00807694	0.0903654	0.96894
AC165433.1	-0.321312	8.98275	77.9712	1.04555e-18	0.00616938	8.98275	0.0287653	0.865322	0.114925	0.00876792	0	0.873439
AC167018.1	0.0479065	4.39332	0.0678712	0.794462	0.0460704	4.39332	0.0631056	0.801653	-0.00561162	0.0205674	0.806473	0.81301
AC169129.1	0.703358	4.73134	29.6769	5.10407e-08	-0.033526	4.73134	0.067766	0.794618	-0.230696	-0.00847389	0	0.80614
AC170752.1	-0.242515	4.86333	3.76447	0.0523526	-0.286557	4.86333	5.25864	0.021838	0.0865318	-0.0956434	0.0656346	0.0295099
AC170864.1	0.0773506	3.9529	0.16711	0.682693	0.0035395	3.9529	0.000287945	0.986461	-0.0255191	-0.00957951	0.700733	0.987059
Acaa1a	1.549	7.38987	470.362	2.67344e-104	-0.0294673	7.38987	0.171426	0.678848	-0.48691	-0.00280993	0	0.695628
Acaa1b	-1.36365	3.96379	20.9147	4.80185e-06	0.0419185	3.96379	0.028079	0.866923	0.424138	0.0125081	1.34243e-05	0.874852
Acaa2	-0.0787835	6.78558	0.441042	0.50662	0.0142468	6.78558	0.01439	0.904516	0.0317468	0.0107374	0.531211	0.910229
Acaca	-0.114365	8.20548	4.3946	0.036053	-0.0550516	8.20548	1.01834	0.312914	0.0445603	-0.0124505	0.0466694	0.341144
Acacb	-0.062346	4.81986	0.168628	0.681334	-0.133219	4.81986	0.769891	0.380251	0.0273031	-0.036413	0.699387	0.407128
Acad11	-0.0293846	6.28446	0.0939949	0.759159	0.00674682	6.28446	0.00496355	0.943834	0.0146002	0.00954112	0.773164	0.946823
Acad8	0.544685	4.623	10.2395	0.00137465	0.142446	4.623	0.700772	0.402525	-0.180048	0.0466651	0.00223178	0.429106
Acadl	0.155977	5.55235	1.699	0.192419	-0.0425326	5.55235	0.125842	0.722783	-0.0531026	-0.00364215	0.21848	0.737831
Acads	-0.120835	4.55447	0.759757	0.383404	-0.116986	4.55447	0.711724	0.398872	0.0456898	-0.0298522	0.411058	0.425388
Acadvl	0.417983	4.74382	9.51157	0.0020418	-0.193077	4.74382	2.02554	0.154674	-0.136579	-0.0531345	0.00319497	0.179949
Acan	0.194115	3.81602	0.826772	0.363208	-0.0323001	3.81602	0.0229868	0.879491	-0.0513533	-0.023097	0.391092	0.886733
Acap2	0.0579738	5.61972	0.28333	0.594527	0.0931307	5.61972	0.731333	0.392451	-0.0146521	0.0372616	0.616023	0.418981
Acap3	0.10489	7.66514	2.43586	0.118589	-0.017497	7.66514	0.0677545	0.794635	-0.0317566	0.00132457	0.140179	0.806157
Acat2	-0.224289	4.2107	0.842806	0.358595	0.101197	4.2107	0.17233	0.678049	0.0779099	0.0350059	0.386484	0.694947
Acat3	-0.0810763	3.56315	0.179667	0.67166	-0.0214928	3.56315	0.0125552	0.910784	0.0361601	0.0108014	0.689997	0.915897
Acer2	-0.106232	5.37983	0.663505	0.415325	0.0291064	5.37983	0.0498983	0.82324	0.0407736	0.0184028	0.442303	0.83315
Acin1	-0.0285298	7.45498	0.183491	0.66839	-0.057685	7.45498	0.750062	0.386457	0.0145255	-0.0132496	0.686926	0.413309
Acly	-0.0540108	8.62276	1.2137	0.270601	-0.00885903	8.62276	0.0326546	0.856598	0.0231813	0.00360796	0.298982	0.864811
Acn9	0.0605524	4.34462	0.098691	0.753406	-0.18194	4.34462	0.887672	0.346109	-0.0185544	-0.054594	0.767978	0.373892
Acot1	0.95415	4.86087	55.2691	1.05107e-13	0.0202981	4.86087	0.0242824	0.876168	-0.315107	0.0146737	0	0.883622
Acot11	-0.219724	7.89484	16.5787	4.66727e-05	-0.0259882	7.89484	0.231924	0.630101	0.0802945	-0.00239314	0.000104038	0.648848
Acot13	-0.854552	6.6777	98.3931	3.43047e-23	-0.0069549	6.6777	0.00653196	0.935585	0.291497	0.00385773	0	0.938725
Acot2	0.316034	4.33699	2.83113	0.0924533	0.0348046	4.33699	0.0343074	0.853055	-0.100815	0.018285	0.111841	0.861341
Acox1	0.0768731	7.75134	1.64266	0.199961	-0.0186781	7.75134	0.0969711	0.755495	-0.0220834	0.000276122	0.226615	0.76874
Acp1	-0.532658	3.44228	4.57486	0.0324443	0.323835	3.44228	1.693	0.193206	0.183071	0.120975	0.0423133	0.220376
Acp2	-0.0102467	6.29273	0.00922875	0.923468	-0.0280807	6.29273	0.0694007	0.792211	0.00763044	-0.00303615	0.928486	0.803764
Acp6	0.737629	3.3725	5.98278	0.0144462	-0.0637193	3.3725	0.0403981	0.840704	-0.226652	-0.0149128	0.0198612	0.849994
Acpl2	-0.172292	6.0649	2.92735	0.0870903	-0.159385	6.0649	2.50572	0.113433	0.0618574	-0.047731	0.105951	0.135394
Acpt	3.33726	4.36306	203.8	3.09444e-46	0.159722	4.36306	0.44878	0.502915	-0.813779	0.0272534	0	0.52662
Acrbp	-0.0783786	5.89139	0.696924	0.403819	0.103638	5.89139	1.21839	0.269678	0.0322674	0.0422186	0.430962	0.297948
Acsbg1	-0.151128	9.55672	20.2523	6.78726e-06	-0.0186118	9.55672	0.307202	0.579402	0.0572194	-7.16551e-05	1.67803e-05	0.600561
Acsf2	0.101778	5.01864	0.498362	0.480221	-0.0413211	5.01864	0.0818685	0.774781	-0.0355047	-0.00559451	0.505699	0.78742
Acsl1	-0.0228622	6.80588	0.0681372	0.794069	-0.014153	6.80588	0.0261245	0.871597	0.0128741	0.000860999	0.806097	0.879235
Acsl3	0.0901399	8.56233	4.37775	0.0364109	-0.000822802	8.56233	0.000364642	0.984765	-0.0265901	0.00626967	0.0470822	0.985455
Acsl6	0.0269303	9.96309	0.926454	0.335786	-0.0311737	9.96309	1.24143	0.265196	-0.00452111	-0.00432237	0.363717	0.293521
Acss2	-0.290643	6.50509	9.59264	0.00195359	0.0202102	6.50509	0.0464129	0.829427	0.105629	0.0139368	0.00310436	0.839151
Acss3	0.383236	3.69438	2.31468	0.128157	-0.0424332	3.69438	0.0267078	0.870184	-0.117093	-0.000793271	0.150224	0.877957
Actl6a	-0.534983	5.56895	15.3771	8.80472e-05	-0.274071	5.56895	4.04214	0.0443775	0.182006	-0.0869553	0.000154379	0.0572343
Actl6b	0.879715	4.83815	40.7464	1.73318e-10	-0.0826712	4.83815	0.357245	0.55004	-0.288395	-0.0207487	0	0.57241
Actn1	0.096871	6.17919	0.806837	0.369057	-0.016593	6.17919	0.0236538	0.877769	-0.0286665	0.000186078	0.396892	0.885085
Actr10	0.257206	7.4163	9.95804	0.00160148	0.0239856	7.4163	0.0867181	0.768392	-0.0825935	0.0154331	0.00256403	0.781255
Actr2	-0.182844	9.07937	15.8795	6.75071e-05	-0.0700684	9.07937	2.33268	0.126683	0.0678309	-0.0175548	0.000130887	0.149828
Actr3	-0.118032	7.45596	3.26254	0.0708791	-0.0343953	7.45596	0.277089	0.598616	0.0460881	-0.00552875	0.0877175	0.618634
Actr5	-0.390279	5.56623	12.3124	0.000449961	-0.298732	5.56623	7.21564	0.00722711	0.136297	-0.0965295	0.000825592	0.010575
Acvr2b	-0.124845	4.55144	0.660873	0.416252	0.053992	4.55144	0.12348	0.72529	0.0474671	0.0247641	0.443172	0.740291
Acvrl1	-0.249372	5.36347	4.59279	0.0321068	0.0891634	5.36347	0.586421	0.443806	0.0916042	0.0359873	0.041934	0.469158
Acyp2	-0.0138149	6.94803	0.0237518	0.877518	-0.088855	6.94803	0.980087	0.322177	0.0114693	-0.0231199	0.885219	0.350239
Adal	0.720219	7.51327	96.5228	8.82224e-23	-0.0352471	7.51327	0.231828	0.630172	-0.23979	-0.00523458	0	0.648909
Adam11	-0.0640853	5.91471	0.418856	0.517509	-0.0538944	5.91471	0.295929	0.586446	0.0292236	-0.0107204	0.541562	0.60723
Adam12	-0.26037	3.22735	0.978442	0.322584	-0.137254	3.22735	0.271557	0.602289	0.0870787	-0.0343011	0.350598	0.622198
Adam17	-8.33652	3.94225	416.111	1.71393e-92	-0.138514	3.94225	2.40381e-09	0.999961	1	0	0	0.999758
Adam19	0.0694581	5.83141	0.261796	0.608889	-0.112138	5.83141	0.682492	0.40873	-0.0190733	-0.0320279	0.629836	0.435017
Adam22	0.0770752	11.0857	11.5884	0.000663639	-0.00507212	11.0857	0.0501883	0.822736	-0.0219147	0.00483161	0.00114777	0.83266
Adam23	-0.0256959	8.67626	0.241099	0.623414	0.298857	8.67626	32.5942	1.13553e-08	0.0137611	0.109459	0.643891	0
Adamts10	0.418535	4.13827	6.23301	0.012539	0.00475962	4.13827	0.000739146	0.97831	-0.137511	0.00503641	0.0174113	0.979313
Adamts15	-0.080135	4.66701	0.402579	0.52576	0.0496232	4.66701	0.154361	0.694402	0.0314251	0.0227937	0.549663	0.710694
Adamts16	-0.239394	5.7222	4.56304	0.0326691	-0.12386	5.7222	1.22282	0.268808	0.0830869	-0.0389747	0.0425717	0.297072
Adamts17	0.100782	4.06284	0.186916	0.665496	0.141373	4.06284	0.370888	0.542521	-0.0308024	0.0698775	0.684033	0.565057
Adamts2	0.12615	5.02833	0.70364	0.401563	0.00430825	5.02833	0.000827888	0.977046	-0.0389454	0.00895142	0.428734	0.978095
Adamts4	0.8602	5.66727	79.3833	5.11579e-19	-0.114032	5.66727	1.38505	0.239244	-0.288775	-0.031587	0	0.266884
Adamts6	0.0176345	5.43353	0.0108627	0.916991	-0.30026	5.43353	3.15582	0.0756569	-0.000511592	-0.0951652	0.922304	0.0930939
Adamts9	0.0604281	5.75193	0.254439	0.613966	-0.0187664	5.75193	0.0244675	0.875701	-0.0146393	0.00211998	0.634884	0.883169
Adamtsl2	1.82166	4.8746	138.951	4.51369e-32	0.0426851	4.8746	0.0746386	0.784699	-0.551432	0.0161546	0	0.796693
Adarb2	-0.0167716	9.11165	0.244836	0.620735	-0.0538679	9.11165	2.52558	0.112014	0.0108781	-0.0123353	0.641341	0.133951
Adat1	-0.349488	4.10181	2.96757	0.0849493	0.129923	4.10181	0.412155	0.520878	0.117013	0.0553573	0.103441	0.544156
Adc	0.21656	6.8223	7.05052	0.00792423	-0.117585	6.8223	2.07901	0.149337	-0.0700191	-0.0341387	0.0113636	0.174455
Adck1	-0.0484822	5.74106	0.180394	0.671035	-0.16658	5.74106	2.13088	0.144358	0.0203377	-0.051414	0.689366	0.168981
Adcy3	0.0657034	7.31127	1.00921	0.315091	0.088824	7.31127	1.8446	0.174412	-0.0174306	0.0373253	0.342916	0.200384
Adcy5	0.0132176	8.48366	0.0782546	0.779677	-0.0225985	8.48366	0.228756	0.632448	0.000420667	-0.00104229	0.792286	0.651201
Adcy7	-0.317975	6.01428	10.7287	0.00105485	0.0806539	6.01428	0.690357	0.406043	0.113323	0.0333086	0.00174515	0.43257
Adcy8	0.0321012	4.04856	0.0282548	0.866511	-0.103685	4.04856	0.297143	0.585679	0.00366137	-0.0179764	0.874651	0.606488
Adcy9	-0.263088	6.33127	5.51141	0.0188928	0.0528797	6.33127	0.222719	0.636976	0.0950749	0.0238027	0.025637	0.655721
Add1	0.143958	8.33684	9.92861	0.00162729	-0.000769495	8.33684	0.000283154	0.986574	-0.0448804	0.00655263	0.00261773	0.987197
Add2	-0.196878	7.01425	0.546171	0.459887	-0.478238	7.01425	3.20433	0.0734435	0.0606219	-0.139772	0.485925	0.0905198
Adh5	4.57215	8.31953	1636.82	0	-0.167156	8.31953	2.39717	0.121555	-0.917212	-0.00876177	0	0.144177
Adipor2	0.0138149	6.68825	0.0279744	0.867169	0.0287955	6.68825	0.121485	0.727429	-0.000311915	0.0163266	0.875262	0.742204
Adk	0.0964122	7.38661	1.06375	0.302362	0.129854	7.38661	1.92894	0.164874	-0.0294272	0.0506762	0.330351	0.190527
Adora1	-0.145129	5.74306	1.96471	0.16101	-0.00221896	5.74306	0.000467192	0.982755	0.0559276	0.00572805	0.185486	0.983549
Adrbk2	-0.0637123	8.34597	1.65508	0.198269	-0.018106	8.34597	0.133672	0.714655	0.0264414	1.75694e-05	0.224722	0.730159
Adss	0.0477548	7.08416	0.377677	0.538849	-0.0495611	7.08416	0.406823	0.523587	-0.0115394	-0.0111099	0.562433	0.546814
Aebp1	0.406649	4.06687	1.82954	0.176182	0.272004	4.06687	0.819822	0.365232	-0.122474	0.0807389	0.201441	0.392405
Aebp2	-0.615452	7.76362	82.0691	1.31409e-19	-0.0248664	7.76362	0.134589	0.713721	0.213284	-0.00253659	0	0.72933
Aen	0.102369	4.4503	0.521549	0.470182	0.350928	4.4503	6.11527	0.0134019	-0.0316021	0.130708	0.495788	0.0187268
AF357341	-0.149069	3.25357	2.29901e-09	0.999962	-7.55914	3.25357	273.404	2.05611e-61	0	-1	0.999772	0
Afap1	-0.179392	4.77059	1.41226	0.234682	-0.0953983	4.77059	0.399156	0.527525	0.0697039	-0.026679	0.262404	0.550499
Afap1l1	-0.7425	5.60233	42.7926	6.08633e-11	-0.0925632	5.60233	0.664757	0.414886	0.255554	-0.0257707	0	0.441021
Aff3	-0.0430756	6.8375	0.242026	0.622747	-0.0062222	6.8375	0.0050494	0.943351	0.0205869	0.00509416	0.64328	0.94631
Aff4	-0.152887	8.60591	11.7883	0.000596055	0.00162102	8.60591	0.00132395	0.970974	0.0577297	0.00703487	0.00104038	0.972262
Aftph	-5.79448e-05	8.01393	1.04426e-06	0.999185	-0.0408256	8.01393	0.52831	0.467318	0.00465474	-0.00779541	0.999285	0.491536
Agap1	0.136628	6.86406	2.27379	0.131578	-0.110605	6.86406	1.49019	0.222186	-0.0409196	-0.0301991	0.153882	0.249829
Agap2	-0.104011	8.35799	4.50054	0.0338841	-0.0951405	8.35799	3.76542	0.0523227	0.041214	-0.0258428	0.0440114	0.0665978
Agap3	0.00670226	7.83388	0.00578167	0.939389	-0.00243226	7.83388	0.000761879	0.977979	0.00300201	0.00575397	0.943074	0.979015
Agbl4	-1.09923	6.07528	82.8314	8.93571e-20	-0.0715226	6.07528	0.35264	0.552622	0.362075	-0.0156954	0	0.574753
Agfg1	-0.129101	8.02166	3.25805	0.0710736	0.0330366	8.02166	0.21339	0.644123	0.0482152	0.0173969	0.0879356	0.662534
Agfg2	0.1946	7.01092	6.04532	0.0139432	0.0846402	7.01092	1.14362	0.284888	-0.0621617	0.0343987	0.0192571	0.31344
Agmo	-0.0603064	3.73337	0.053811	0.81656	-0.0892245	3.73337	0.120752	0.72822	0.0195793	-0.0348648	0.827522	0.742862
Agpat1	0.00357272	8.36351	0.00533815	0.941756	0.0411794	8.36351	0.709246	0.399694	0.00363233	0.020859	0.94534	0.426301
Agpat3	0.795372	3.97698	16.6632	4.46384e-05	-0.275953	3.97698	1.99544	0.157774	-0.265529	-0.0833828	9.73259e-05	0.183261
Agpat4	0.242985	8.00373	15.9232	6.5966e-05	0.0467479	8.00373	0.589665	0.442549	-0.0789498	0.0225642	0.00012753	0.467926
Agpat5	-2.42178	3.51908	69.005	9.82134e-17	-0.242404	3.51908	0.707863	0.400154	0.695768	-0.0447493	0	0.426761
Agphd1	-0.211387	4.09718	1.77213	0.183119	-0.377617	4.09718	5.64512	0.017504	0.082396	-0.11478	0.208824	0.0240328
Agps	0.101832	7.32622	1.6648	0.196957	-0.0998747	7.32622	1.60141	0.205703	-0.0304059	-0.0277093	0.223329	0.233169
Agrn	-0.064765	7.23528	0.88304	0.34737	0.0213306	7.23528	0.0958036	0.756925	0.0271715	0.0143294	0.375453	0.770183
Agt	-0.125046	9.15609	10.6013	0.0011301	-0.0208354	9.15609	0.294329	0.587459	0.0478865	-0.000414071	0.00188946	0.608243
Agtrap	0.841495	4.04696	29.9365	4.46426e-08	0.0566518	4.04696	0.134561	0.713749	-0.280789	0.0218025	0	0.72936
Agxt2l2	-0.0822075	4.64109	0.34421	0.557409	-0.0092847	4.64109	0.00444171	0.946863	0.0381501	-0.000424274	0.580247	0.949713
Ahcy	-8.29159	6.13747	20.332	6.51034e-06	-0.520987	6.13747	0.16958	0.680486	0.755234	-0.0149208	1.34243e-05	0.697226
Ahcyl1	-0.0899373	8.36125	3.20576	0.0733793	-0.0390911	8.36125	0.60567	0.436423	0.0365283	-0.00705808	0.0904594	0.461999
Ahdc1	-0.203375	7.01033	7.65967	0.0056469	-0.0254376	7.01033	0.11983	0.729219	0.075424	-3.82623e-05	0.0084405	0.743842
Ahi1	0.127979	8.45526	3.58978	0.0581361	0.0492985	8.45526	0.532871	0.465402	-0.0387948	0.0241197	0.0726924	0.489549
Ahnak2	-0.188189	4.69857	2.11287	0.146065	0.0196088	4.69857	0.0231095	0.879173	0.0692133	0.0182287	0.169407	0.88638
Ahr	0.522269	3.67378	4.19584	0.0405232	0.170557	3.67378	0.444234	0.505086	-0.166123	0.0626428	0.0519116	0.528745
AI413582	-0.216103	6.64049	5.3585	0.0206215	0.0221495	6.64049	0.0563114	0.812424	0.0787095	0.0149799	0.0279023	0.823055
AI464131	-0.0834674	8.26873	2.19764	0.138222	-0.00964139	8.26873	0.0293277	0.864025	0.0337127	0.00322373	0.161037	0.872154
AI597479	-0.000452723	5.79423	2.29815e-05	0.996175	-0.224302	5.79423	5.42407	0.0198611	0.00353736	-0.0725861	0.996278	0.0269761
AI836003	0.101925	4.93205	0.689269	0.406413	0.0423669	4.93205	0.119119	0.729992	-0.030085	0.0235865	0.433503	0.74459
AI854703	0.22508	6.99993	8.20804	0.00417052	0.00723132	6.99993	0.00847966	0.92663	-0.0744517	0.00902429	0.00635974	0.930432
Aimp1	0.414108	6.27355	16.7225	4.32642e-05	0.0407817	6.27355	0.162165	0.687171	-0.1348	0.0205501	9.39698e-05	0.70369
AK157302	1.36833	5.75738	162.127	3.8809e-37	0.060664	5.75738	0.316216	0.57389	-0.441225	0.022252	0	0.595168
Ak2	0.431531	6.64559	17.7329	2.54197e-05	-0.182971	6.64559	3.19372	0.0739214	-0.140459	-0.0569829	6.04092e-05	0.0910568
Ak4	0.164729	6.0418	2.98751	0.0839089	0.116003	6.0418	1.4812	0.223588	-0.0541793	0.0462984	0.102367	0.251332
Akap1	0.0325273	6.28223	0.134066	0.714253	-0.0174668	6.28223	0.0386558	0.844132	-0.00624744	0.000946167	0.730471	0.853088
Akap10	2.45728	6.01967	339.555	7.97668e-76	0.0486924	6.01967	0.134532	0.713779	-0.685211	0.0156924	0	0.729407
Akap11	-0.0873489	9.0198	5.11761	0.0236842	-0.0624843	9.0198	2.61903	0.105589	0.0343545	-0.0156603	0.0316544	0.126866
Akap12	-0.470456	4.46763	9.89678	0.00165568	0.179798	4.46763	1.44019	0.230108	0.158987	0.067948	0.00264458	0.257799
Akap13	0.0164164	6.75408	0.0465161	0.82924	0.0315682	6.75408	0.171906	0.678423	-0.00198717	0.0171361	0.839308	0.695289
Akap2	-0.0423889	7.93095	0.570385	0.450106	-0.00637896	7.93095	0.0129274	0.909477	0.0195012	0.00374051	0.475954	0.914786
Akap5	0.145778	5.15539	1.55413	0.212526	-0.00920461	5.15539	0.00618522	0.937314	-0.0454177	0.00206051	0.23967	0.940363
Akap6	0.0860883	9.62472	6.8396	0.00891589	-0.0125705	9.62472	0.145837	0.702546	-0.0250469	0.00226767	0.0126725	0.71852
Akap8	-0.309057	4.78257	4.32273	0.0376065	0.149907	4.78257	1.01767	0.313072	0.108036	0.0543053	0.0484146	0.341308
Akap8l	0.0699597	5.00457	0.211509	0.645587	-0.287072	5.00457	3.55625	0.0593215	-0.0230327	-0.088222	0.665192	0.0745885
Akap9	0.146691	9.12828	14.835	0.000117338	0.0372266	9.12828	0.955574	0.328305	-0.0460547	0.019806	0.000248349	0.356129
Akirin1	0.264333	6.84029	9.62956	0.0019147	-0.0326461	6.84029	0.14692	0.701496	-0.0869001	-0.00477957	0.00302717	0.717439
Akirin2	0.164733	6.39286	2.64242	0.104045	0.029062	6.39286	0.0822164	0.774316	-0.0525127	0.0169087	0.124352	0.78694
Akr1a1	0.0060447	7.76812	0.0106394	0.917846	-0.043789	7.76812	0.558578	0.454834	0.0030119	-0.00841977	0.923153	0.479511
Akr1c14	-2.0362	4.13889	94.2999	2.71164e-22	-0.182021	4.13889	0.727952	0.393548	0.604755	-0.0342082	0	0.420062
Akr1e1	-0.68731	6.9316	60.413	7.69031e-15	-0.157599	6.9316	3.18723	0.0742156	0.23582	-0.0462232	0	0.0914192
Akt1	0.122595	7.39921	3.03914	0.0812792	-0.0396185	7.39921	0.317404	0.573172	-0.0373941	-0.00685936	0.0992422	0.594453
Akt1s1	0.236279	5.97705	5.08408	0.0241464	0.0780976	5.97705	0.555694	0.456001	-0.0764208	0.0326423	0.0322149	0.480622
Akt2	-0.112823	4.87026	0.799967	0.371103	-0.219937	4.87026	3.04131	0.0811703	0.0429509	-0.0738043	0.398932	0.0992053
Akt3	0.196931	8.19131	13.8116	0.000202089	0.03566	8.19131	0.452979	0.500924	-0.0631889	0.0188467	0.000385947	0.524808
Aktip	-0.153543	9.03139	12.1192	0.000499053	-0.0979614	9.03139	4.93336	0.026343	0.0579843	-0.0271108	0.000889357	0.0353595
AL513014.1	-0.637862	3.47713	7.44531	0.0063602	-0.149525	3.47713	0.409214	0.522369	0.220736	-0.0477318	0.00932315	0.545646
AL607123.1	0.118764	6.11441	1.0064	0.315766	0.0984365	6.11441	0.692076	0.405459	-0.032297	0.0390046	0.343597	0.432009
AL645646.1	0.645896	3.84477	12.0354	0.000522006	0.0565473	3.84477	0.090365	0.763714	-0.219478	0.026708	0.000936342	0.77664
AL670236.1	-0.230167	3.9252	1.60844	0.204711	-0.0242467	3.9252	0.0177889	0.893897	0.0820678	0.00131652	0.23137	0.900392
AL772190.1	-0.18719	4.10152	0.586291	0.443857	0.0591615	4.10152	0.0589935	0.808094	0.0686313	0.0312624	0.469832	0.819111
Alad	-1.51454	5.46374	147.51	6.07111e-34	-0.125844	5.46374	1.01401	0.313944	0.484233	-0.02892	0	0.34208
Alcam	0.822455	6.32838	46.4997	9.16303e-12	-0.0986028	6.32838	0.671897	0.412391	-0.268718	-0.0224831	0	0.438574
Aldh1a1	-0.361342	9.12486	61.7001	3.99956e-15	0.0360621	9.12486	0.61533	0.432788	0.129714	0.0185085	0	0.458647
Aldh1l2	0.343553	5.76678	13.9156	0.000191209	-0.144938	5.76678	2.47411	0.115735	-0.1132	-0.0427334	0.000365811	0.137864
Aldh2	0.117485	6.01277	1.52705	0.216555	0.113717	6.01277	1.43081	0.231632	-0.0369837	0.0479599	0.243979	0.259397
Aldh4a1	-0.0254906	3.83554	0.0163989	0.898103	0.274116	3.83554	1.93444	0.164273	0.00996935	0.0975043	0.904564	0.189943
Aldh5a1	-0.167604	9.41117	23.0513	1.57734e-06	-0.00702221	9.41117	0.0404731	0.840558	0.0627636	0.00412846	3.35607e-06	0.84984
Aldh9a1	-0.377866	3.94455	3.3071	0.0689813	-0.157476	3.94455	0.577027	0.44748	0.128185	-0.0344246	0.0854622	0.472635
Aldoc	-0.570591	10.1825	297.358	1.23978e-66	-0.0204527	10.1825	0.383348	0.535817	0.199865	-0.000522288	0	0.55857
Alg1	-0.704769	6.9316	57.5603	3.27771e-14	-0.0308266	6.9316	0.110634	0.739424	0.242378	-0.00450821	0	0.753544
Alg2	-0.0532208	9.2911	2.24778	0.133807	-0.0113389	9.2911	0.102032	0.749404	0.0231978	0.00254744	0.156248	0.762854
Alg6	-0.413456	4.47471	5.25139	0.0219293	-0.213598	4.47471	1.40267	0.236277	0.143194	-0.0641736	0.0296039	0.263921
Alg9	0.366503	6.77318	20.7106	5.34188e-06	-0.169407	6.77318	4.42724	0.0353697	-0.120722	-0.0520268	1.34243e-05	0.0461593
Alk	0.000843421	3.93036	3.96415e-05	0.994976	-0.119141	3.93036	0.468743	0.493566	0.00146086	-0.0350508	0.995261	0.517334
Alkbh5	0.000445457	3.58616	3.59722e-06	0.998487	-0.0864004	3.58616	0.183851	0.668084	0.00145713	-0.0226311	0.998684	0.685496
Alkbh6	-0.327116	7.05074	19.6748	9.18019e-06	-0.157058	7.05074	4.53674	0.0331747	0.117009	-0.0467884	2.01364e-05	0.0435215
Alms1	0.441526	3.60397	4.08725	0.0432078	0.31753	3.60397	2.1165	0.14572	-0.132904	0.106669	0.0550227	0.170666
Alox5ap	-0.547388	3.6827	6.34533	0.0117691	-0.0261399	3.6827	0.0168654	0.896672	0.192109	-0.0105567	0.0163776	0.902919
Aloxe3	-0.37817	3.9791	2.45321	0.117285	0.0253415	3.9791	0.0108155	0.917171	0.12319	0.0100329	0.13881	0.921649
Alpk1	1.28272	6.04876	127.65	1.33904e-29	0.101663	6.04876	0.805759	0.369377	-0.409991	0.0334689	0	0.396435
Alpl	-0.677619	5.52683	30.8029	2.85617e-08	-0.0687507	5.52683	0.317178	0.573308	0.235819	-0.0165514	0	0.594607
Alyref	-0.0312131	5.88573	0.0986661	0.753436	-0.238531	5.88573	5.76403	0.0163575	0.0124596	-0.0748586	0.768009	0.0225796
Ambra1	-0.221056	6.39664	6.72481	0.00950808	0.0102121	6.39664	0.0143579	0.904622	0.081475	0.0104807	0.0134444	0.910339
Amd1	-10.3859	5.88337	1274.38	4.17775e-279	0.02502	5.88337	-2.71393e-11	1	1	0	0	1
Amigo1	-0.48583	4.08231	8.97927	0.00273059	0.039112	4.08231	0.0581295	0.809477	0.170049	0.0135375	0.00420179	0.82033
Amigo2	-0.132988	7.34742	4.06189	0.0438615	-0.0525672	7.34742	0.634626	0.425664	0.0503995	-0.0114796	0.0558114	0.451686
Ammecr1l	0.227594	4.58452	2.65965	0.102924	-0.289984	4.58452	4.3184	0.0377025	-0.0730123	-0.0933018	0.123144	0.0490858
Amotl2	0.173279	6.17141	3.77343	0.0520729	0.133439	6.17141	2.23756	0.134693	-0.0542747	0.0510495	0.0653225	0.158426
Ampd3	0.142887	6.9898	2.93386	0.0867401	0.00309785	6.9898	0.00138263	0.970338	-0.0444218	0.00754614	0.105531	0.971635
Amz2	-0.0619565	4.11644	0.101603	0.749914	0.00440334	4.11644	0.000522957	0.981755	0.028956	0.00779002	0.764602	0.982538
Anapc11	0.0803679	7.00406	1.0412	0.307542	-0.00343193	7.00406	0.00190006	0.965231	-0.0236132	0.00533618	0.335311	0.966966
Anapc13	3.60346	5.9946	525.674	2.46707e-116	-0.00727722	5.9946	0.00177886	0.966358	-0.845855	0.00139561	0	0.968013
Anapc16	0.0158161	5.40023	0.0206032	0.885865	0.116255	5.40023	1.11381	0.291256	-0.00216843	0.0466549	0.893126	0.319806
Anapc4	0.222253	4.37792	2.04882	0.152324	-0.0344269	4.37792	0.049126	0.824591	-0.0721171	-0.00811973	0.176032	0.834509
Anapc5	0.0017156	8.58911	0.000502134	0.982122	-0.0245697	8.58911	0.10309	0.748152	0.00403804	-0.00177738	0.983196	0.761669
Angel2	0.316509	7.20997	19.346	1.09047e-05	-0.0776865	7.20997	1.1657	0.280287	-0.105105	-0.0194178	2.34925e-05	0.308761
Angpt1	-0.0672122	4.93211	0.254853	0.613678	0.133951	4.93211	1.01081	0.314708	0.0305082	0.0492955	0.634602	0.342788
Angptl1	-0.263187	4.57385	1.65063	0.198873	-0.0776765	4.57385	0.143637	0.704692	0.103716	-0.0238458	0.225393	0.72054
Angptl3	0.434663	3.8338	3.44236	0.0635448	-0.235715	3.8338	1.01518	0.313666	-0.13866	-0.0711055	0.079032	0.341825
Angptl4	-0.331523	3.58384	1.27248	0.259302	-0.504695	3.58384	2.94195	0.0863063	0.110548	-0.161175	0.28734	0.105052
Angptl7	-0.25602	5.68949	3.03844	0.081314	0.0724335	5.68949	0.243003	0.622046	0.0921224	0.0275788	0.0993026	0.641059
Ank	-0.61365	8.84538	225.11	6.94575e-51	-0.0639982	8.84538	2.45185	0.117386	0.213928	-0.0149623	0	0.139713
Ank2	0.0620835	12.3741	11.3462	0.000756043	-0.039422	12.3741	4.57498	0.0324422	-0.0166797	-0.00706545	0.00129544	0.0425985
Ank3	-0.00738601	10.0512	0.0515178	0.820443	-0.0373985	10.0512	1.32068	0.250471	0.00753206	-0.00638956	0.831002	0.278433
Ankdd1b	0.218537	3.50866	0.794374	0.372781	-0.268646	3.50866	1.20493	0.272338	-0.0606887	-0.0896517	0.400613	0.300653
Ankfn1	-0.0658486	3.79516	0.137817	0.710461	0.0335578	3.79516	0.0354819	0.850589	0.0319383	0.0111815	0.726763	0.858958
Ankhd1	0.0438615	4.5886	0.0677226	0.794682	0.0766676	4.5886	0.207343	0.648858	-0.00964465	0.0335931	0.806724	0.666971
Ankib1	0.0659067	8.12886	1.81313	0.178133	-0.00558084	8.12886	0.0129992	0.909227	-0.0181505	0.00463554	0.203623	0.914538
Ankmy2	0.0959298	6.89921	1.51237	0.218778	-0.103592	6.89921	1.76384	0.184146	-0.0279724	-0.0297083	0.246147	0.21064
Ankrd10	-0.19367	6.59173	4.942	0.0262116	-0.0495668	6.59173	0.323775	0.569348	0.0728472	-0.0124607	0.0347621	0.590865
Ankrd11	-0.0727892	7.47017	1.45616	0.227541	-0.0324906	7.47017	0.290141	0.59013	0.0300345	-0.00436339	0.25492	0.610683
Ankrd12	-3.45434	3.98639	30.9199	2.68906e-08	-0.761204	3.98639	1.35405	0.244572	0.703914	-0.193791	0	0.272405
Ankrd13a	-0.196972	5.07355	1.56033	0.211616	0.190402	5.07355	1.45727	0.227366	0.0726321	0.0698447	0.238613	0.255199
Ankrd17	0.23687	9.17364	26.8292	2.22257e-07	-0.00423831	9.17364	0.00858608	0.926173	-0.0771533	0.00501416	0	0.930003
Ankrd26	-0.168896	7.48749	5.86502	0.0154447	0.12043	7.48749	2.98227	0.0841811	0.0627369	0.0479665	0.02116	0.102555
Ankrd34a	0.273887	4.05392	1.96611	0.160862	-0.152345	4.05392	0.607445	0.435751	-0.0916998	-0.0446956	0.185312	0.461375
Ankrd35	0.391695	5.69871	10.3456	0.00129784	0.0135315	5.69871	0.0122553	0.911851	-0.126206	0.00813921	0.00211768	0.916887
Ankrd40	-3.19853	9.83383	3910.92	0	-0.01084	9.83383	0.0482544	0.826129	0.804638	0.00116227	0	0.83607
Ankrd42	0.0325941	6.2755	0.0874661	0.767424	0.082009	6.2755	0.553324	0.456963	-0.00728633	0.0354992	0.780681	0.481558
Ankrd44	0.276872	5.50654	4.7603	0.0291234	-0.094563	5.50654	0.555352	0.456139	-0.0904969	-0.0275098	0.0383867	0.480753
Ankrd45	0.0211144	7.42072	0.0636279	0.800851	0.101555	7.42072	1.47231	0.224981	-0.00268255	0.0417647	0.812547	0.252698
Ankrd49	-0.144036	5.44007	1.20982	0.271367	-0.0251252	5.44007	0.0365682	0.848347	0.0565808	0.00275589	0.299791	0.856944
Ankrd50	0.0352425	8.07861	0.592426	0.441483	-0.0378595	8.07861	0.683668	0.408326	-0.0076055	-0.0066183	0.46745	0.434664
Ankrd52	-0.118937	7.49955	2.22581	0.135721	0.0709856	7.49955	0.792678	0.373291	0.0459761	0.0297257	0.158292	0.400238
Ankrd6	0.0267824	5.3571	0.0692116	0.792488	-0.0207731	5.3571	0.0416628	0.838264	-0.00165619	0.000146131	0.804492	0.847672
Anks1	0.112703	6.89126	1.67427	0.195688	-0.241217	6.89126	7.66844	0.00561952	-0.0322995	-0.0758625	0.221947	0.00842037
Anks1b	-0.0359877	7.31507	0.271914	0.60205	0.0557388	7.31507	0.65216	0.419341	0.0173559	0.0251912	0.623205	0.445128
Anks3	0.331862	5.82877	10.4916	0.00119921	-0.0714928	5.82877	0.487158	0.485198	-0.109743	-0.0204413	0.00198679	0.509256
Anks6	-0.0898546	4.44564	0.209859	0.646878	-0.00603638	4.44564	0.000970247	0.975151	0.0386976	0.00168869	0.666384	0.976256
Ankzf1	-0.4725	3.66876	6.85588	0.00883499	-0.0381094	3.66876	0.0465755	0.829133	0.158724	-0.0118233	0.012545	0.838885
Ano1	0.0328907	5.29997	0.0511156	0.821133	0.0455386	5.29997	0.0977233	0.754579	-0.00639635	0.0197581	0.831589	0.767811
Ano4	0.0196877	6.04457	0.029191	0.864339	-0.00068299	6.04457	3.53575e-05	0.995256	-0.00234607	0.0062135	0.872604	0.995402
Ano6	0.165007	6.42029	3.37951	0.0660116	0.0181996	6.42029	0.0411479	0.839253	-0.0518751	0.0139915	0.0818544	0.848598
Anp32a	0.403119	5.10491	10.2024	0.00140256	-0.161182	5.10491	1.62643	0.202197	-0.132238	-0.0455296	0.00228212	0.229508
Anp32e	-0.122154	6.27711	1.61669	0.203554	-0.112356	6.27711	1.36687	0.242351	0.048321	-0.0286439	0.230203	0.270039
Antxr1	-0.350044	4.68722	5.48906	0.0191358	-0.00800901	4.68722	0.00278864	0.957885	0.122593	0.00421684	0.0259961	0.959898
Anxa1	0.215918	5.07096	2.79689	0.0944473	0.0588127	5.07096	0.20689	0.649216	-0.0804417	0.0245966	0.114103	0.667317
Anxa4	0.0199845	3.82448	0.00632774	0.936597	0.303103	3.82448	1.69418	0.193051	0.00192873	0.116805	0.940564	0.220248
Anxa5	0.0334813	8.41959	0.435341	0.50938	-0.0425904	8.41959	0.704449	0.401293	-0.00660826	-0.00803617	0.533893	0.427925
Anxa6	-0.009335	8.65706	0.0380041	0.845435	-0.00940178	8.65706	0.0385531	0.844337	0.00829521	0.00285229	0.85485	0.85329
Anxa7	0.0126842	5.7912	0.0161257	0.898951	-0.244821	5.7912	6.01001	0.014225	0.00024776	-0.0774099	0.905339	0.0198209
Aox1	-0.469672	4.53089	11.3152	0.000768735	-0.266184	4.53089	3.62801	0.0568147	0.164578	-0.085291	0.00130887	0.0717124
Ap1ar	0.549903	7.94532	56.6155	5.29927e-14	-0.0158365	7.94532	0.0470895	0.828208	-0.182135	-0.000386216	0	0.837986
Ap1b1	-0.633337	5.68979	30.1574	3.98369e-08	-0.229557	5.68979	3.96504	0.0464543	0.216763	-0.067398	0	0.0596843
Ap1g2	0.039064	4.03597	0.0613984	0.804299	-0.32152	4.03597	4.16564	0.0412517	-0.00211395	-0.10648	0.815792	0.0534789
Ap1m1	7.3495	4.49634	553.532	2.14593e-122	0.109203	4.49634	0.0234233	0.878362	-0.990399	0.000671983	0	0.885702
Ap1s1	0.0882086	7.73052	2.29739	0.129591	-0.0338967	7.73052	0.339285	0.560242	-0.0254426	-0.00557977	0.151714	0.582136
Ap2a1	-0.0494499	6.07377	0.20762	0.648639	-0.0762075	6.07377	0.493352	0.482436	0.0206769	-0.0209404	0.668068	0.50646
Ap2b1	0.114265	9.37447	9.48719	0.00206911	0.00957821	9.37447	0.0666653	0.796255	-0.0346211	0.00974272	0.00324867	0.807765
Ap3b2	0.0345815	9.04128	0.528626	0.467185	-0.030604	9.04128	0.414025	0.519934	-0.00726986	-0.00398989	0.493076	0.54324
Ap3m1	0.270205	6.38858	9.25874	0.00234375	-0.104596	6.38858	1.38765	0.238803	-0.0872701	-0.0300811	0.0036514	0.266535
Ap4b1	-0.50304	5.787	11.384	0.000740779	0.20125	5.787	1.82589	0.176614	0.17182	0.0712286	0.00128202	0.202713
Ap4e1	-0.32946	6.35575	12.4473	0.000418601	-0.0644471	6.35575	0.47659	0.489971	0.116902	-0.0155771	0.000751759	0.51385
Ap4s1	-0.0300972	7.02569	0.158018	0.690988	0.0639661	7.02569	0.71381	0.398182	0.0155674	0.0295357	0.708536	0.424666
Ap5m1	-0.442779	6.1457	18.7511	1.48936e-05	0.078877	6.1457	0.595267	0.440389	0.156219	0.0329077	3.69167e-05	0.465896
Apba1	0.0868149	8.38698	3.83157	0.0502958	0.0728545	8.38698	2.69837	0.100451	-0.0252959	0.0315999	0.0633289	0.121087
Apba2	-0.150574	7.89124	3.67062	0.0553795	-0.0219191	7.89124	0.0778111	0.780286	0.0563761	-0.00137714	0.0695075	0.792619
Apbb2	-0.037971	4.1171	0.0482646	0.826111	-0.164118	4.1171	0.890471	0.34535	0.0319343	-0.0434659	0.836237	0.373151
Apbb3	0.01723	6.43835	0.0269567	0.869586	0.00912581	6.43835	0.00762526	0.930415	-0.000487546	0.0122296	0.877467	0.9341
Apc	-1.36226	3.63763	43.6079	4.01213e-11	0.115581	3.63763	0.322898	0.569871	0.442918	0.0310776	0	0.591406
Apcdd1	-0.390753	4.14417	6.04594	0.0139383	-0.137852	4.14417	0.750244	0.386399	0.137009	-0.0400963	0.0192437	0.413242
Aph1b	-0.900373	7.27645	165.296	7.88371e-38	-0.00699939	7.27645	0.0100336	0.920211	0.306207	0.00306746	0	0.924475
Aph1c	-0.291371	5.50038	5.60462	0.0179132	0.107299	5.50038	0.760459	0.383185	0.104633	0.0441662	0.0244322	0.410027
Aplp1	0.0731436	10.9682	9.57271	0.00197491	-0.0255003	10.9682	1.16357	0.280726	-0.0204764	-0.00224188	0.00313456	0.309214
Aplp2	0.0261573	9.9313	0.834419	0.360998	-0.0157577	9.9313	0.302821	0.582119	-0.00451275	0.000961157	0.388834	0.603075
Apod	-0.0532296	9.28771	1.2912	0.255827	-0.0715075	9.28771	2.33024	0.126883	0.0226507	-0.0179961	0.283836	0.150026
Apold1	-0.205748	6.57605	5.25375	0.0218995	-0.0722209	6.57605	0.647382	0.42105	0.0796902	-0.019444	0.0295736	0.446974
App	0.0354862	10.2554	1.07112	0.300694	0.0182289	10.2554	0.282642	0.594975	-0.00757859	0.0128107	0.32877	0.615284
Appl2	0.0481739	6.99197	0.263384	0.607805	0.0335396	6.99197	0.127622	0.720911	-0.0124474	0.0179688	0.628745	0.735962
Aprt	-0.847327	6.32591	95.0552	1.85148e-22	-0.0195259	6.32591	0.050522	0.822157	0.290606	0.001725	0	0.83222
Aqp4	0.252198	8.78763	36.9676	1.20106e-09	0.00418138	8.78763	0.0101703	0.919671	-0.081994	0.00769387	0	0.923968
Aqr	-0.847796	5.73189	62.3622	2.85753e-15	-0.0356588	5.73189	0.110201	0.739916	0.289557	-0.00567895	0	0.753964
Arap1	-0.366406	3.64667	3.39494	0.0653966	-0.0279894	3.64667	0.0198193	0.888043	0.127445	-0.00709839	0.0811799	0.894784
Arap2	-8.74878	5.42727	899.875	1.0449e-197	-1.15469	5.42727	5.45024	0.0195657	0.995935	-0.00406504	0	0.0266102
Arcn1	2.9013	8.25875	1101.18	1.82802e-241	0.0899137	8.25875	1.13196	0.287359	-0.759536	0.0164121	0	0.315906
Arf1	-0.0851281	7.50626	2.26972	0.131923	-0.0114966	7.50626	0.0414054	0.838757	0.0340996	0.00275287	0.154191	0.848108
Arf3	-0.194379	3.909	1.21493	0.270359	0.0548416	3.909	0.0967094	0.755815	0.07834	0.027161	0.298727	0.769059
Arf5	-0.697053	6.6589	50.3273	1.30127e-12	-0.066101	6.6589	0.455253	0.499851	0.232499	-0.0191073	0	0.523697
Arf6	-0.928372	6.2592	6.16263	0.0130477	0.465469	6.2592	1.54696	0.213585	0.260661	0.108899	0.0180892	0.241157
Arfgap1	0.0145223	7.93323	0.00398313	0.949677	-0.0102746	7.93323	0.00198659	0.964449	-0.000240449	0.00301017	0.952837	0.966272
Arfgap3	0.0217456	6.07984	0.0356697	0.850199	-0.0543047	6.07984	0.222325	0.637274	-0.00326855	-0.0122823	0.859186	0.656034
Arfgef1	0.0195674	7.95387	0.125322	0.723332	0.00395663	7.95387	0.00512299	0.94294	-0.00305756	0.00803564	0.73922	0.945887
Arfip1	0.235754	4.08806	1.52797	0.216418	0.0487234	4.08806	0.0650172	0.798735	-0.0763188	0.0189618	0.243821	0.810241
Arfip2	-0.119907	6.58282	2.09823	0.14747	-0.069772	6.58282	0.710414	0.399306	0.0457968	-0.0167078	0.170965	0.425801
Arhgap1	0.0889721	5.62539	0.436957	0.508595	-0.0660426	5.62539	0.24076	0.623657	-0.0236376	-0.0147047	0.533178	0.642613
Arhgap12	-0.00375163	8.01867	0.00548729	0.94095	-0.0260275	8.01867	0.264261	0.607208	0.00539655	-0.00195349	0.944588	0.626866
Arhgap19	0.119417	4.2321	0.528329	0.46731	0.00276513	4.2321	0.000287524	0.986471	-0.0382421	0.00626199	0.493187	0.987072
Arhgap26	0.0897827	7.29073	1.20388	0.272548	-0.0620302	7.29073	0.574703	0.448396	-0.0267678	-0.01498	0.301086	0.473544
Arhgap27	-0.0130286	3.33286	0.00362641	0.951981	0.116551	3.33286	0.286185	0.592676	0.00618055	0.0526585	0.954861	0.613002
Arhgap29	-0.0140681	6.65134	0.0262373	0.871322	0.186019	6.65134	4.59038	0.0321518	0.00770211	0.0713126	0.879215	0.0422428
Arhgap30	-0.216913	3.26563	1.24912	0.263721	0.396697	3.26563	4.18046	0.0408926	0.0828906	0.142985	0.291911	0.0530393
Arhgap32	-0.0351552	9.12488	0.716156	0.397408	-0.0306046	9.12488	0.542733	0.461302	0.0172566	-0.00382475	0.424583	0.48567
Arhgap33	-0.0234063	6.0722	0.0594097	0.807431	0.0462206	6.0722	0.231494	0.630418	0.0142483	0.021112	0.818776	0.649167
Arhgap39	0.276596	4.6171	3.53193	0.0601976	0.134232	4.6171	0.832848	0.36145	-0.0833407	0.0499809	0.0750349	0.38875
Arhgap44	-0.070588	8.6061	2.566	0.109184	0.0280446	8.6061	0.405035	0.5245	0.0293488	0.0161891	0.130239	0.54775
Arhgap5	0.067613	7.11964	0.680926	0.409268	-0.0470903	7.11964	0.330265	0.565503	-0.0217472	-0.0117318	0.436439	0.587382
Arhgdia	0.0935087	6.70227	1.38674	0.238956	0.0256697	6.70227	0.104552	0.746434	-0.0279161	0.0161952	0.266915	0.760038
Arhgdib	0.66266	4.42418	10.1903	0.0014118	0.268786	4.42418	1.6785	0.195124	-0.208901	0.0855254	0.00229555	0.222339
Arhgdig	0.0183575	4.26342	0.00763899	0.930353	-0.0331712	4.26342	0.0262175	0.87137	0.00714873	-0.0175974	0.934812	0.879027
Arhgef12	0.100148	9.62391	6.42227	0.0112698	-0.0229559	9.62391	0.337475	0.56129	-0.029824	-0.00145351	0.0157936	0.583224
Arhgef15	0.492024	7.47338	47.1136	6.6988e-12	0.000406103	7.47338	3.1826e-05	0.995499	-0.164072	0.00640497	0	0.995627
Arhgef17	0.0756786	8.8006	1.40462	0.235951	-0.031037	8.8006	0.236235	0.626938	-0.021216	-0.00381578	0.263713	0.645737
Arhgef2	-0.172225	7.24357	6.53647	0.0105685	-0.0888391	7.24357	1.73937	0.187219	0.065176	-0.0247689	0.0148841	0.21405
Arhgef26	0.041237	5.30858	0.095839	0.756881	-0.157978	5.30858	1.40547	0.23581	-0.00824024	-0.0511919	0.771069	0.263411
Arhgef28	-0.191661	6.25662	3.62412	0.0569475	-0.191186	6.25662	3.60434	0.0576288	0.0715856	-0.0573328	0.0713365	0.072642
Arhgef37	2.60491	5.62359	241.728	1.65128e-54	0.100462	5.62359	0.362609	0.547061	-0.704994	0.0215395	0	0.569477
Arhgef40	-0.798388	3.07476	6.69934	0.00964486	0.106819	3.07476	0.120196	0.728822	0.246557	0.0290697	0.0136424	0.743479
Arhgef7	-0.102539	7.17821	2.41051	0.120523	0.0832883	7.17821	1.59044	0.207264	0.0400685	0.035556	0.142247	0.234727
Arid1a	0.0809036	5.70871	0.585768	0.44406	0.0654874	5.70871	0.383803	0.535575	-0.0255326	0.030783	0.470017	0.558271
Arid4a	-0.0443903	7.74246	0.503601	0.477922	-0.149851	7.74246	5.73821	0.0165997	0.0191841	-0.0452192	0.503474	0.0228649
Arid5b	-0.166847	6.1717	2.87929	0.0897254	0.0445969	6.1717	0.205714	0.650148	0.0605415	0.0207716	0.108938	0.668219
Arl1	0.0606958	7.07762	0.50707	0.47641	0.00382252	7.07762	0.00200945	0.964245	-0.0156687	0.00754279	0.501933	0.966063
Arl15	0.0811754	5.86184	0.468126	0.493851	-0.0427909	5.86184	0.129734	0.718708	-0.0220889	-0.00268271	0.518764	0.733837
Arl4c	-0.158577	7.49087	6.29619	0.0120998	-0.0914126	7.49087	2.09229	0.148044	0.0595474	-0.0251628	0.0168072	0.173012
Arl4d	-0.046669	4.44666	0.0946191	0.758385	-0.00660227	4.44666	0.0018743	0.965468	0.0290183	0.00689023	0.772455	0.967188
Arl5a	-0.924795	6.06651	12.0303	0.000523415	0.06716	6.06651	0.0638719	0.800478	0.299196	0.0194879	0.000936342	0.811896
Arl6	-0.0505766	7.32133	0.370119	0.542939	-0.0310635	7.32133	0.139626	0.708653	0.0216257	-0.00396833	0.566521	0.724423
Armc1	0.212394	8.15216	16.9589	3.81987e-05	-0.00903405	8.15216	0.0306774	0.860962	-0.069165	0.00326385	8.39016e-05	0.869201
Armc10	1.20286	7.73913	340.018	6.32217e-76	0.0152327	7.73913	0.0549392	0.814681	-0.388873	0.00959698	0	0.825052
Armc7	-0.127973	4.43838	0.741783	0.38909	0.176243	4.43838	1.40799	0.235391	0.0478611	0.069169	0.416558	0.262998
Armc8	-0.365037	5.31653	9.5367	0.00201403	-0.0621752	5.31653	0.276587	0.598947	0.127522	-0.0134848	0.00318155	0.618922
Armc9	0.0642752	6.30162	0.406428	0.523788	-0.0205825	6.30162	0.0415843	0.838414	-0.0178182	0.00154522	0.5478	0.847802
Arnt2	0.243024	8.65122	27.7002	1.4165e-07	-0.0160574	8.65122	0.120969	0.727986	-0.0790942	0.00133348	0	0.742664
Arntl	0.157874	7.0553	3.34629	0.0673566	0.110024	7.0553	1.62543	0.202337	-0.0499109	0.04487	0.0835459	0.229619
Arntl2	0.579146	5.62389	21.1574	4.23069e-06	-0.0186714	5.62389	0.0219625	0.882187	-0.191579	0.00194483	1.34243e-05	0.889193
Arpc1b	7.86587	5.33483	808.958	6.0881e-178	-0.311398	5.33483	0.499633	0.479661	-0.991046	-0.000479693	0	0.503739
Arpc2	0.103383	5.23588	0.700882	0.402488	-0.282153	5.23588	5.21935	0.022337	-0.0329555	-0.0880083	0.429586	0.0302113
Arpc4	0.0726906	7.61488	1.56595	0.210797	-0.0515094	7.61488	0.786172	0.37526	-0.0210615	-0.0106353	0.237824	0.402184
Arpc5	0.136081	7.85982	6.92252	0.00851168	-0.0727402	7.85982	1.97791	0.159611	-0.0428383	-0.0189459	0.0121188	0.185154
Arpp19	1.32179	7.51221	422.022	8.85632e-94	-0.0867264	7.51221	1.82041	0.177265	-0.424419	-0.0194216	0	0.203404
Arrb1	0.115778	9.05745	8.00432	0.00466658	-0.0166449	9.05745	0.165459	0.684179	-0.0351777	0.000753881	0.00704102	0.700824
Arrb2	0.126255	7.82429	4.95086	0.0260777	-0.0195953	7.82429	0.119266	0.729832	-0.0387619	-0.000190596	0.0346145	0.744432
Arrdc3	0.00319197	5.48843	0.000839006	0.976892	-0.0573876	5.48843	0.275016	0.599987	0.00834093	-0.0114127	0.978313	0.619952
Arrdc4	-0.371811	3.56112	2.391	0.122035	-0.0379377	3.56112	0.0244923	0.875639	0.123331	-0.0103809	0.143666	0.883098
Arsb	0.732376	5.58312	44.5708	2.45325e-11	-0.191713	5.58312	3.04765	0.0808542	-0.244403	-0.0546639	0	0.0988965
Arsg	-0.435106	6.37565	20.3474	6.45795e-06	-0.130117	6.37565	1.82115	0.177176	0.153402	-0.0381873	1.34243e-05	0.203297
Arsj	-0.90743	4.29987	31.2632	2.25307e-08	-0.223631	4.29987	1.89486	0.168655	0.307276	-0.067603	0	0.194413
Arsk	0.403458	5.79696	10.1331	0.00145626	-0.193284	5.79696	2.32763	0.127096	-0.133045	-0.0608452	0.00234925	0.150264
Asap1	0.06605	8.27801	1.35296	0.244762	-0.0694649	8.27801	1.49645	0.221219	-0.0179099	-0.0180141	0.272774	0.248799
Asap2	0.159508	4.8474	0.905848	0.341218	-0.00382447	4.8474	0.000504719	0.982076	-0.0483013	0.00528539	0.369395	0.982871
Asap3	0.208318	3.73198	0.650282	0.420012	-0.172061	3.73198	0.444353	0.505029	-0.0569518	-0.045235	0.44678	0.528718
Asb1	-0.0657586	7.67585	1.1328	0.287178	-0.043805	7.67585	0.502697	0.478318	0.0276318	-0.00879388	0.315386	0.502386
Asb13	-0.196517	7.66235	13.6305	0.000222543	-0.0263275	7.66235	0.244616	0.620892	0.0726478	-0.00232296	0.000422864	0.639901
Asb16	-0.333396	4.18587	2.876	0.0899093	-0.000370718	4.18587	6.60267e-06	0.99795	0.122931	0.00463528	0.109139	0.99806
Asb3	-0.382627	5.32159	6.21598	0.0126602	0.0156795	5.32159	0.0103687	0.918894	0.132778	0.0118396	0.0175958	0.92325
Asb4	-0.071107	4.99339	0.160057	0.689104	-2.93412	4.99339	275.969	5.6771e-62	0.0162157	-0.767482	0.706848	0
Asb7	-0.295028	3.50278	1.52236	0.217263	0.344294	3.50278	2.08752	0.148507	0.0954284	0.132455	0.24465	0.173549
Ascc1	0.657753	5.52339	34.1001	5.23477e-09	-0.0739328	5.52339	0.430789	0.511602	-0.220237	-0.0187799	0	0.535306
Ascc2	0.242414	5.05779	3.93636	0.0472528	0.111607	5.05779	0.834756	0.360901	-0.0796318	0.0454768	0.0597312	0.388256
Ascc3	-0.000656883	6.04546	3.70477e-05	0.995144	0.0592058	6.04546	0.293221	0.588164	0.00549955	0.0263673	0.995402	0.608918
Ash1l	0.0257153	7.86004	0.161686	0.687609	0.103777	7.86004	2.6323	0.10471	-0.00438977	0.0427487	0.705411	0.125863
Asic1	0.105049	6.88279	1.48798	0.22253	0.0786789	6.88279	0.834585	0.36095	-0.0325202	0.0334613	0.25005	0.388307
Asic2	0.0666244	6.62206	0.685919	0.407556	-0.0863038	6.62206	1.15131	0.283274	-0.0174799	-0.0242749	0.434684	0.311752
Asic4	0.0369282	4.43381	0.0492983	0.824289	-0.0367429	4.43381	0.0494186	0.824078	0.00207168	-0.0156217	0.834459	0.834002
Asns	0.00638026	7.74154	0.00735785	0.931643	-0.0587041	7.74154	0.623494	0.429752	0.00302957	-0.0146877	0.936017	0.455754
Asnsd1	0.115073	3.8045	0.45664	0.499198	-0.0217237	3.8045	0.0163393	0.898287	-0.0361605	-0.00988953	0.524086	0.904369
Asph	0.0745633	8.50851	2.06621	0.150595	0.0884272	8.50851	2.9059	0.0882561	-0.0209979	0.0370015	0.174213	0.107243
Asphd2	0.103061	5.61019	0.810154	0.368075	0.0756421	5.61019	0.436477	0.508828	-0.0292594	0.0317632	0.395955	0.532473
Asrgl1	0.222181	7.27426	10.0722	0.00150525	0.015483	7.27426	0.0489282	0.824939	-0.0717774	0.012238	0.00241637	0.834831
Astn1	-0.0376264	9.29781	0.46894	0.493475	0.0073823	9.29781	0.0180531	0.893117	0.0177377	0.00910544	0.518415	0.899707
Astn2	-0.344332	5.18694	8.33805	0.00388232	-0.132769	5.18694	1.2393	0.265606	0.122194	-0.0381668	0.00593352	0.293948
Asun	-0.204753	6.76541	5.00565	0.0252647	0.0806215	6.76541	0.776278	0.378282	0.0754439	0.0341746	0.0336143	0.405205
Asxl3	-0.402127	4.88071	6.11346	0.0134156	0.0724882	4.88071	0.197778	0.65652	0.140722	0.027314	0.0185154	0.674425
Atad2	0.348941	5.13	9.20502	0.00241352	0.110757	5.13	0.926772	0.335703	-0.1143	0.0422589	0.00376551	0.363358
Atad2b	0.602599	5.65664	1.5572	0.212076	0.330515	5.65664	0.466112	0.494781	-0.152604	0.0918402	0.239133	0.518603
Atad3a	-7.40564	4.05074	41.3057	1.30191e-10	0.0685539	4.05074	0.000937185	0.975578	0.926006	-0.00933908	0	0.976695
Atad5	-0.300386	5.22488	3.84479	0.0499007	-0.0767668	5.22488	0.251643	0.61592	0.107403	-0.0214587	0.0627718	0.635142
Atat1	0.0416375	5.10376	0.11728	0.732004	-0.0128685	5.10376	0.0111474	0.915914	-0.0114062	0.00471834	0.74761	0.920525
Atcay	8.36259	5.81017	1169.68	2.36545e-256	0.459365	5.81017	0.929096	0.335098	-0.995252	0.00205979	0	0.362834
Ate1	8.94731	5.25485	962.518	2.52143e-211	0.734583	5.25485	2.6098	0.106205	-0.997368	0.00263158	0	0.127534
Atf1	-0.235313	4.44662	2.20371	0.137679	0.17886	4.44662	1.27309	0.259189	0.0808695	0.0671129	0.16046	0.287276
Atf2	-0.148227	5.99092	2.37398	0.123372	-0.0477133	5.99092	0.246095	0.619838	0.0560518	-0.00994055	0.145066	0.638861
Atf4	0.0304873	7.85234	0.255644	0.613128	-0.0323867	7.85234	0.288522	0.591169	-0.00509171	-0.00483514	0.634038	0.611613
Atf5	0.698458	4.17343	7.84863	0.00508594	-0.2675	4.17343	1.13959	0.285739	-0.221516	-0.0733176	0.00760484	0.314356
Atf6	0.124465	7.42127	2.65654	0.103125	0.0128225	7.42127	0.0281937	0.866654	-0.0379537	0.0107155	0.123345	0.874604
Atf6b	0.0577326	6.43515	0.275535	0.599642	0.0803877	6.43515	0.534229	0.464834	-0.0155439	0.0345888	0.62102	0.489019
Atf7ip	-0.208797	8.39989	22.8292	1.77058e-06	-0.0152775	8.39989	0.122253	0.726604	0.0770715	0.00142128	3.35607e-06	0.741422
Atg12	-0.0829904	5.46259	0.678047	0.41026	0.207875	5.46259	4.25711	0.0390864	0.0273715	0.0749641	0.437477	0.0507605
Atg13	0.251265	3.49993	1.00096	0.317079	0.376054	3.49993	2.22019	0.136216	-0.0843859	0.12399	0.344876	0.159994
Atg16l1	-0.125925	5.85848	1.51309	0.218669	0.0207312	5.85848	0.0410308	0.839478	0.0476038	0.013864	0.246033	0.848772
Atg3	0.0329027	6.31383	0.0891319	0.765284	-0.0642925	6.31383	0.340426	0.559584	-0.00589052	-0.015106	0.778876	0.581415
Atg4a-ps	-3.07119	4.02844	137.397	9.87377e-32	0.19603	4.02844	0.550351	0.458174	0.780258	0.0313522	0	0.482703
Atg4b	0.0540287	6.72315	0.357213	0.550058	0.029922	6.72315	0.109506	0.740707	-0.0136614	0.0159911	0.573125	0.754655
Atg4c	0.290456	6.70086	12.8113	0.000344528	0.0115717	6.70086	0.0203679	0.886514	-0.0950349	0.00941512	0.000641008	0.893388
Atg7	0.140023	5.55569	1.5601	0.211651	-0.0416134	5.55569	0.13783	0.710448	-0.0434728	-0.00856456	0.238653	0.726189
Atg9a	-0.0515967	6.82403	0.414926	0.51948	-0.0505739	6.82403	0.398716	0.527753	0.0212765	-0.0109364	0.543542	0.550703
Atg9b	-0.190038	4.04652	1.01539	0.313616	-0.380507	4.04652	4.06971	0.0436588	0.0736984	-0.129017	0.341513	0.0563685
Atic	-0.384297	7.24177	26.025	3.37018e-07	-0.000966745	7.24177	0.000165614	0.989732	0.136005	0.00487213	0	0.989986
Atm	-0.00925348	4.1631	0.00196866	0.96461	-0.314117	4.1631	2.06455	0.15076	0.0178527	-0.0930342	0.966587	0.175985
Atmin	-0.0036941	8.14424	0.00471835	0.945236	-0.0154735	8.14424	0.0827697	0.773579	0.00620216	0.00122374	0.948582	0.786239
Atp10a	-0.248408	5.69966	6.09176	0.0135813	-0.0030111	5.69966	0.000919828	0.975805	0.0897112	0.00156495	0.0187369	0.976924
Atp10b	-0.0339058	3.75355	0.0317657	0.858543	-0.0185373	3.75355	0.00944624	0.922574	0.0138236	0.00264329	0.866945	0.9267
Atp11a	-0.0624458	9.17875	2.36132	0.124377	-0.0426611	9.17875	1.10205	0.293816	0.0265107	-0.00795957	0.146157	0.322196
Atp11b	-7.61691	4.29017	441.129	6.14865e-98	1.09525	4.29017	4.82918	0.027982	0.994318	0.00568182	0	0.0372926
Atp13a3	-0.0979318	7.52336	2.11083	0.14626	0.000848277	7.52336	0.00015723	0.989995	0.0390755	0.00652151	0.169646	0.990291
Atp13a4	-0.111258	6.0881	0.892829	0.344712	-0.0245678	6.0881	0.0433891	0.834994	0.0447329	-0.000570291	0.372815	0.844547
Atp13a5	0.157016	4.78177	0.661318	0.416095	0.00919938	4.78177	0.00226533	0.962039	-0.046263	0.0105437	0.443024	0.963845
Atp1a1	0.0729359	8.32599	1.89485	0.168656	-0.00738161	8.32599	0.0194027	0.889218	-0.0200843	0.00416072	0.193695	0.895932
Atp1a2	-0.334913	9.49045	98.3008	3.59427e-23	-0.00657033	9.49045	0.0378717	0.845701	0.119986	0.00438384	0	0.854562
Atp1a3	0.00556951	10.7694	0.049123	0.824596	-0.0108887	10.7694	0.187766	0.664782	0.00289309	0.0028492	0.834764	0.682345
Atp1b1	-0.169466	7.37698	4.88939	0.0270222	0.0459029	7.37698	0.35808	0.549574	0.0922042	0.00487308	0.0357757	0.571961
Atp1b2	0.0651519	9.45402	2.79419	0.0946065	-0.0323447	9.45402	0.688665	0.406619	-0.0180909	-0.00462689	0.114261	0.433067
Atp1b3	0.548958	9.19428	140.248	2.34966e-32	0.00679481	9.19428	0.0215548	0.883278	-0.183081	0.00842291	0	0.890287
Atp2b1	-0.753283	7.51095	77.0312	1.68274e-18	0.129011	7.51095	2.27276	0.131665	0.254444	0.0453223	0	0.155218
Atp2b2	0.0378633	9.53586	0.91971	0.337551	0.00483819	9.53586	0.0150155	0.902473	-0.00833067	0.00827844	0.365573	0.908393
Atp2b4	0.134945	6.73275	1.90495	0.167525	-0.0450361	6.73275	0.212447	0.644856	-0.0392335	-0.0111704	0.192514	0.663148
Atp2c1	-0.74774	4.1673	16.8631	4.01745e-05	-0.207609	4.1673	1.29774	0.254627	0.25188	-0.0509833	9.39698e-05	0.282608
Atp5b	0.0409286	12.217	5.11118	0.0237722	-0.0312723	12.217	2.98395	0.084094	-0.00933981	-0.00421089	0.0317618	0.102457
Atp5e	0.70482	7.98424	121.869	2.46593e-28	-0.0263271	7.98424	0.170536	0.679636	-0.235124	-0.00202169	0	0.6964
Atp5g1	-0.395953	8.63124	66.7264	3.11931e-16	-0.0296962	8.63124	0.375813	0.539853	0.140812	-0.00294992	0	0.562497
Atp5g3	-0.219713	3.94077	1.18061	0.277232	0.0850018	3.94077	0.176942	0.674014	0.0758191	0.03204	0.305821	0.691051
Atp5j	2.16806	8.93326	530.757	1.93329e-117	-0.0437346	8.93326	0.230728	0.630984	-0.628774	-0.0034367	0	0.649704
Atp5s	-0.0681444	5.38586	0.32801	0.566833	-0.37278	5.38586	9.79998	0.00174514	0.0278583	-0.119615	0.589097	0.00283587
Atp5sl	0.240483	6.70215	7.38375	0.00658157	-0.129885	6.70215	2.15453	0.14215	-0.0785712	-0.0385993	0.00958828	0.166679
Atp6v0a1	0.00107822	8.05468	0.000306789	0.986025	-0.116194	8.05468	3.57469	0.0586666	0.00411684	-0.0338607	0.986868	0.0737562
Atp6v0a4	0.175277	6.2182	3.61368	0.057306	-0.0816992	6.2182	0.785094	0.375588	-0.056996	-0.0204265	0.0717695	0.402503
Atp6v0b	-0.132943	9.42088	15.2621	9.35731e-05	-0.0693887	9.42088	4.15807	0.0414366	0.050689	-0.0173836	0.000174515	0.0536903
Atp6v0e	0.0438888	6.82143	0.296746	0.58593	-0.246648	6.82143	9.37239	0.00220278	-0.0107303	-0.0782066	0.607538	0.00360441
Atp6v1b2	-0.175297	10.1614	24.7623	6.48526e-07	-0.0116205	10.1614	0.108852	0.741455	0.0653926	0.00273778	0	0.75539
Atp6v1g1	0.0627107	7.85503	1.01287	0.314217	-0.0842024	7.85503	1.82637	0.176557	-0.0159061	-0.0227066	0.342127	0.202666
Atp6v1g2	-0.659337	9.59928	332.841	2.31179e-74	-0.0166878	9.59928	0.213984	0.643663	0.228884	0.000830112	0	0.662158
Atp6v1h	0.0454849	7.23698	0.345192	0.556847	-0.0617928	7.23698	0.636997	0.4248	-0.0114332	-0.0145007	0.579673	0.450773
Atp8a1	0.0374357	9.51	1.45341	0.227982	-0.0197879	9.51	0.406096	0.523958	-0.00795261	-0.00037447	0.2554	0.547196
Atp8a2	-0.483314	4.11561	9.61148	0.00193365	-0.302782	4.11561	3.76213	0.0524257	0.164877	-0.094557	0.00306409	0.0666884
Atp8b1	-0.0384048	3.1572	0.023331	0.8786	-0.30298	3.1572	1.39492	0.237576	0.0134973	-0.093474	0.886216	0.26525
Atp8b2	0.0517443	7.36323	0.577141	0.447435	-0.153973	7.36323	5.11018	0.0237859	-0.0129698	-0.0468727	0.473353	0.0322082
Atp9b	0.00699075	5.54725	0.0024848	0.960244	-0.387507	5.54725	7.56894	0.00593828	0.00320702	-0.12329	0.962627	0.00884659
Atpaf1	-0.39513	7.15101	23.3172	1.37367e-06	0.102688	7.15101	1.57557	0.2094	0.140367	0.0411139	3.35607e-06	0.236901
Atpaf2	-0.445023	3.91251	5.23643	0.0221186	-0.0190929	3.91251	0.00937407	0.92287	0.16436	0.0124917	0.0298153	0.926992
Atpif1	0.0837539	8.95771	3.27729	0.070245	-0.0190377	8.95771	0.169333	0.680706	-0.024257	-5.73708e-05	0.086959	0.697441
Atr	-0.42514	5.98592	12.2449	0.000466543	0.0285364	5.98592	0.0550359	0.814521	0.151495	0.0155599	0.000845728	0.824897
Atrnl1	-0.277061	10.128	64.558	9.37336e-16	-0.0357727	10.128	1.07711	0.299346	0.100414	-0.00556729	0	0.327428
Atxn2	-0.0323708	4.93029	0.0561518	0.812685	-0.156063	4.93029	1.2995	0.254304	0.0171625	-0.0465764	0.823884	0.282275
Atxn2l	0.107088	4.32072	0.361768	0.547526	-0.136375	4.32072	0.590292	0.442306	-0.0194974	-0.0406458	0.570857	0.467688
Atxn3	0.438322	4.02239	5.53971	0.0185897	-0.189897	4.02239	1.04297	0.307132	-0.146403	-0.0651201	0.0253014	0.335234
Atxn7	-0.230965	3.71649	0.675965	0.41098	0.341869	3.71649	1.48049	0.223697	0.0731489	0.109974	0.438181	0.251423
Atxn7l3	-0.0781727	8.28533	2.63658	0.104428	-0.0577551	8.28533	1.43925	0.230261	0.0313564	-0.0138833	0.124792	0.257991
AU021092	0.371611	4.21913	3.13433	0.0766597	-0.00810349	4.21913	0.00145061	0.969618	-0.129715	0.0105907	0.0940403	0.97098
AU022252	-0.0806642	5.22751	0.470453	0.492779	0.0969795	5.22751	0.68018	0.409525	0.0325879	0.0405649	0.517737	0.435876
Auh	-0.0403415	7.08421	0.221015	0.638267	-0.0610601	7.08421	0.505891	0.476923	0.0202265	-0.0139007	0.658218	0.501144
Aurkaip1	-0.00863173	7.66945	0.0216013	0.883153	0.00867808	7.66945	0.0218219	0.882562	0.00847422	0.00922212	0.890589	0.889585
Auts2	0.0893694	4.34796	0.348467	0.554982	-0.105313	4.34796	0.483592	0.4868	-0.0281507	-0.0300454	0.57779	0.510874
AUTS2	0.11785	4.21536	0.529773	0.466702	-0.21067	4.21536	1.69081	0.193495	-0.0386179	-0.0651983	0.49255	0.220658
AV039307	0.390488	5.55699	13.8361	0.000199467	0.180666	5.55699	2.96107	0.0852916	-0.131263	0.0682103	0.000382591	0.1039
Aven	-0.372301	4.8613	4.72313	0.0297595	-0.0796238	4.8613	0.214948	0.642916	0.136964	-0.0149403	0.0391619	0.661531
Avp	0.108411	8.35728	4.02867	0.0447333	-0.0276372	8.35728	0.261795	0.60889	-0.0290655	-0.00416503	0.0567343	0.628406
AW551984	-0.036105	7.59046	0.198391	0.656022	0.0428391	7.59046	0.279776	0.596848	0.0149281	0.0239007	0.67519	0.617039
AW554918	0.0303243	4.95382	0.0545632	0.815305	-0.204134	4.95382	2.47007	0.116033	-0.00551479	-0.0609042	0.826314	0.13825
Axin1	0.334141	5.38694	11.772	0.000601276	0.123741	5.38694	1.61263	0.204122	-0.107885	0.0506519	0.00104374	0.231478
Axin2	-0.0958885	5.89357	0.849886	0.356585	-0.148558	5.89357	2.04033	0.153177	0.0374398	-0.0453115	0.384555	0.178449
AY036118	2.69402	8.85581	471	1.9414e-104	-0.321533	8.85581	7.39406	0.00654398	-0.719536	-0.0523521	0	0.00969903
Azin1	-0.0159377	5.51264	0.0131037	0.908864	-0.0979372	5.51264	0.488219	0.484723	0.014334	-0.0153631	0.914743	0.508746
B230118H07Rik	-0.00077868	7.64699	0.000170572	0.98958	-0.0102485	7.64699	0.0293892	0.863884	0.00609989	0.00258636	0.990294	0.872053
B230120H23Rik	0.15302	5.48924	1.38533	0.239195	-0.0349744	5.48924	0.0724339	0.787825	-0.0449497	-0.00459215	0.267173	0.799566
B230206L02Rik	-0.938516	5.12071	19.1492	1.20887e-05	0.174399	5.12071	0.663151	0.41545	0.298847	0.0468449	3.35607e-05	0.441487
B230216G23Rik	-0.132107	3.3174	0.316108	0.573956	0.517604	3.3174	4.90051	0.0268488	0.0513541	0.18427	0.595977	0.0359636
B230216N24Rik	0.794791	5.31568	6.13232	0.0132733	-0.396111	5.31568	1.52837	0.216358	-0.235071	-0.111098	0.0182906	0.244103
B230307C23Rik	-0.95662	3.72797	15.3454	8.95408e-05	-0.096927	3.72797	0.156217	0.692663	0.310506	-0.0280725	0.000164447	0.709033
B230314M03Rik	0.568054	4.82451	17.1675	3.42234e-05	-0.0478834	4.82451	0.121084	0.727862	-0.191029	-0.00950814	7.38334e-05	0.742566
B2m	-0.299002	8.81929	42.9265	5.68352e-11	-0.0823822	8.81929	3.26005	0.070987	0.108431	-0.0211601	0	0.0877645
B3galnt1	0.0825807	6.55904	0.944306	0.331173	0.0245933	6.55904	0.0837185	0.77232	-0.0236136	0.0143056	0.35924	0.785118
B3galt2	-0.0319604	7.33553	0.258459	0.611181	-0.0326089	7.33553	0.269057	0.603965	0.0156883	-0.00488061	0.632172	0.623785
B3galt4	-0.0338427	3.69724	0.0246625	0.875211	-0.174274	3.69724	0.640801	0.423421	0.0175175	-0.0518687	0.882934	0.449323
B3galt5	0.501054	8.22475	93.5227	4.01567e-22	0.0688314	8.22475	1.76716	0.183734	-0.1675	0.0298057	0	0.210147
B3galt6	-0.0642812	6.45231	0.665919	0.414478	0.0121738	6.45231	0.0238621	0.877236	0.0274848	0.010072	0.4415	0.884625
B3galtl	-0.175413	7.20402	5.90213	0.0151226	-0.0223614	7.20402	0.0959456	0.75675	0.0655914	-0.00135954	0.0207506	0.770026
B3gat2	0.0744867	4.28578	0.219059	0.639758	0.0130362	4.28578	0.00671155	0.934707	-0.0308795	0.00977371	0.659729	0.93794
B3gnt1	0.069921	7.54963	1.42366	0.232801	-0.0887635	7.54963	2.29427	0.129852	-0.0198106	-0.0241513	0.260498	0.153271
B3gnt2	0.0244364	5.03414	0.0495391	0.823867	-0.631259	5.03414	33.2395	8.14777e-09	-0.00379574	-0.211631	0.834116	0
B430202K04Rik	-0.14313	5.193	1.69677	0.192711	0.0886785	5.193	0.651381	0.419619	0.0539781	0.0388069	0.218738	0.445467
B4galnt1	-0.00811264	5.84036	0.00547686	0.941006	0.0208896	5.84036	0.0362884	0.848921	0.0069641	0.011685	0.944665	0.857431
B4galnt4	-0.126172	4.44598	0.625873	0.428873	-0.0470026	4.44598	0.0863758	0.768836	0.0562608	-0.00639185	0.45526	0.781664
B4galt2	0.265816	5.70703	8.02072	0.00462451	-0.0773486	5.70703	0.678833	0.409989	-0.0880971	-0.0203446	0.00698733	0.436369
B4galt3	-0.147087	4.03933	0.582178	0.44546	-0.275983	4.03933	2.05424	0.151783	0.0468943	-0.0872299	0.471309	0.176979
B4galt6	0.137225	8.40514	12.3069	0.000451293	0.00836023	8.40514	0.0456974	0.830727	-0.0431746	0.00936412	0.000825592	0.840335
B630005N14Rik	-1.30696	3.53032	28.7411	8.27276e-08	0.0651357	3.53032	0.0718151	0.788712	0.413047	0.0145963	0	0.800395
B930095G15Rik	-0.14435	7.0241	3.82119	0.0506083	0.0537382	7.0241	0.529594	0.466777	0.0536044	0.0247374	0.063688	0.490969
Baalc	-0.532428	4.95955	23.2079	1.45401e-06	0.111993	4.95955	1.02351	0.311687	0.192664	0.0465013	3.35607e-06	0.339828
Bach2	-0.0543886	4.86592	0.246336	0.619667	-0.166179	4.86592	2.30127	0.129268	0.0230055	-0.047617	0.640247	0.152597
Bag5	0.265455	6.919	12.7086	0.000363975	-0.0773626	6.919	1.07959	0.29879	-0.0876391	-0.0203278	0.000661145	0.326985
Bag6	-0.0394273	7.43565	0.318284	0.572641	-0.0605387	7.43565	0.750385	0.386354	0.0183503	-0.0149544	0.594769	0.413205
Bahd1	0.142316	5.539	1.78631	0.181377	-0.172097	5.539	2.61419	0.105912	-0.0407038	-0.0548282	0.207109	0.127222
Bai1	-0.814683	4.31502	4.15651	0.0414749	0.481087	4.31502	1.46571	0.226024	0.220325	0.127609	0.0529755	0.253762
Bai2	0.147262	8.57921	10.4575	0.00122149	-0.0695445	8.57921	2.33254	0.126695	-0.0459806	-0.0183222	0.00202371	0.149838
Bai3	-0.0503534	7.72771	0.769134	0.380485	-0.119683	7.72771	4.34453	0.037128	0.0221452	-0.0343932	0.408178	0.0484213
Baiap3	0.162543	9.82771	15.9155	6.62335e-05	-0.0105684	9.82771	0.0673082	0.795297	-0.0510734	0.00279508	0.00012753	0.806865
Banp	0.129034	5.85828	1.10879	0.292345	-0.0848079	5.85828	0.479056	0.48885	-0.038161	-0.0218145	0.32041	0.512793
Bard1	-0.0252579	3.64415	0.0144414	0.904347	-0.0375186	3.64415	0.0319344	0.858172	0.0110499	-0.00399837	0.910578	0.866429
Baz2a	0.259473	7.42696	13.1727	0.000284057	-0.0100804	7.42696	0.0198837	0.887862	-0.0847265	0.00296459	0.000530258	0.894646
Bbox1	0.159451	4.734	0.746671	0.387532	0.16166	4.734	0.764727	0.381853	-0.0540047	0.0565782	0.415105	0.408688
Bbs10	0.467552	5.17237	14.0819	0.000175015	-0.234174	5.17237	3.53097	0.0602324	-0.156365	-0.0736599	0.000345675	0.0756054
Bbs7	0.0990548	6.40824	1.15395	0.282725	0.185176	6.40824	4.03071	0.0446791	-0.0312154	0.068727	0.311094	0.0575901
Bbx	0.389095	5.42951	9.33495	0.00224824	-0.0795715	5.42951	0.390545	0.532013	-0.127914	-0.0205717	0.00353394	0.554794
BC003331	0.354876	8.83684	68.8928	1.03962e-16	-0.0548481	8.83684	1.64685	0.199389	-0.117531	-0.0126338	0	0.226712
BC003965	-0.00474359	6.38967	0.00282931	0.957579	0.0592043	6.38967	0.440816	0.506729	0.0065934	0.0264396	0.960137	0.530423
BC004004	0.279988	6.45904	7.75883	0.00534505	0.0237084	6.45904	0.0557532	0.813339	-0.0916564	0.0164776	0.00801093	0.82383
BC005537	0.0499259	6.88422	0.449535	0.502556	0.0438423	6.88422	0.346567	0.556063	-0.0128873	0.0207036	0.527228	0.578079
BC016423	0.0858896	7.72964	2.42364	0.119517	-0.052126	7.72964	0.892669	0.344755	-0.0251033	-0.0111841	0.141119	0.372574
BC018507	0.188317	8.33827	16.5531	4.73053e-05	-0.0469545	8.33827	1.0292	0.310347	-0.0601787	-0.00948158	0.000104038	0.33859
BC026585	1.02288	5.2932	77.1274	1.60277e-18	-0.142279	5.2932	1.48525	0.222955	-0.336905	-0.0395821	0	0.250611
BC029722	0.064598	7.85592	1.35181	0.244962	-0.0423021	7.85592	0.579561	0.446485	-0.0181982	-0.00710756	0.272982	0.471759
BC030499	0.101276	4.20584	0.368821	0.543647	0.0976795	4.20584	0.343444	0.557848	-0.0311688	0.0452042	0.567155	0.579921
BC035947	0.819513	4.30698	32.6295	1.11512e-08	-0.0500375	4.30698	0.119115	0.729996	-0.274168	-0.0104534	0	0.744593
BC046401	0.24325	5.45835	3.9186	0.0477546	-0.0985462	5.45835	0.643106	0.422588	-0.0798154	-0.0264914	0.0603018	0.448541
BC048403	0.357527	4.71722	7.57542	0.00591695	-0.221865	4.71722	2.91427	0.087799	-0.116399	-0.0670007	0.0087996	0.106679
BC049715	-0.14592	4.20254	0.821217	0.364825	-0.184859	4.20254	1.31791	0.250967	0.0577658	-0.0545654	0.3927	0.278923
BC053749	-0.192236	3.91507	0.878848	0.348517	-0.452752	3.91507	4.90537	0.0267733	0.0659033	-0.145392	0.376665	0.0358663
BC056474	0.28849	4.21407	3.54493	0.0597278	-0.209013	4.21407	1.85822	0.17283	-0.0992753	-0.0602967	0.0744509	0.19875
BC064078	1.08478	4.86285	44.8481	2.12923e-11	0.105319	4.86285	0.420827	0.516524	-0.347269	0.0414172	0	0.540038
BC067074	0.302878	4.01764	2.14442	0.143089	-0.133701	4.01764	0.417388	0.518243	-0.10167	-0.0366372	0.166176	0.541602
BC068281	-0.263919	3.98324	1.01461	0.313802	-0.129482	3.98324	0.244343	0.621087	0.094995	-0.0373718	0.341681	0.640086
BC096441	-0.459395	4.5614	11.3307	0.000762365	0.173374	4.5614	1.60923	0.2046	0.162156	0.0660834	0.00130887	0.232045
BC100451	0.0215688	6.42661	0.0436901	0.834431	-0.236895	6.42661	5.26253	0.0217893	-0.00287234	-0.0746851	0.844315	0.0294394
Bcar1	-0.0490497	6.61058	0.250833	0.616489	-0.0613926	6.61058	0.393095	0.530677	0.0205358	-0.0145273	0.637307	0.553529
Bcar3	0.34042	5.66991	7.43485	0.00639727	-0.0647139	5.66991	0.269155	0.603899	-0.11137	-0.0150824	0.00936342	0.623711
Bcas3	-0.127638	5.71004	0.848387	0.357009	-0.2394	5.71004	2.98292	0.0841474	0.0476216	-0.0728575	0.384964	0.102528
Bcat1	-0.139883	9.5563	15.1381	9.99247e-05	-0.00556155	9.5563	0.0239358	0.877049	0.053306	0.00480365	0.000201364	0.884447
Bcdin3d	0.168589	4.14369	1.00604	0.315854	-0.146775	4.14369	0.763772	0.382151	-0.0439271	-0.0434541	0.343658	0.408963
Bckdhb	-0.301176	6.22165	6.77334	0.00925294	0.0848653	6.22165	0.538393	0.4631	0.107081	0.0347093	0.0130853	0.487398
Bcl11a	-0.298474	3.53271	1.41406	0.234383	0.159345	3.53271	0.404094	0.524983	0.110115	0.0533782	0.262085	0.54817
Bcl11b	-0.174578	5.30038	2.70536	0.100012	0.0234229	5.30038	0.048583	0.825548	0.065116	0.0173385	0.119999	0.835442
Bcl2	0.00471531	3.41116	0.000703787	0.978835	-0.0804446	3.41116	0.193096	0.660352	0.00147303	-0.0238933	0.980206	0.678187
Bcl2l13	-0.0619563	6.47427	0.498778	0.480037	-0.00620754	6.47427	0.00502225	0.943503	0.0268819	0.00369268	0.505507	0.946444
Bcl2l2	-0.0331497	6.58103	0.162473	0.68689	0.0383029	6.58103	0.216884	0.641424	0.0164435	0.0195978	0.704814	0.660094
Bcl7a	0.941467	4.76941	34.6941	3.85791e-09	-0.0815255	4.76941	0.259831	0.610236	-0.307227	-0.0144843	0	0.629578
Bcl7c	0.116941	4.38339	0.576237	0.447791	0.0611419	4.38339	0.157414	0.691548	-0.0362968	0.0290098	0.473729	0.707794
Bclaf1	-0.5594	6.64308	37.8902	7.48405e-10	-0.0117721	6.64308	0.0169761	0.896335	0.190736	-0.00025456	0	0.90263
Bcr	1.93152	3.22959	57.0439	4.2619e-14	-0.0318663	3.22959	0.019085	0.890123	-0.579657	-0.000421787	0	0.896858
Bcs1l	0.0101147	4.42601	0.00461684	0.945828	-0.0357309	4.42601	0.0579297	0.809799	0.000920674	-0.0114056	0.949209	0.820581
Bdh1	-0.0108263	6.62301	0.0126107	0.910588	-0.0672416	6.62301	0.487355	0.48511	0.00728599	-0.0168696	0.916498	0.509149
Becn1	-0.0781418	8.31308	1.95497	0.162052	-0.0300551	8.31308	0.289203	0.590732	0.0318069	-0.00348307	0.186611	0.61122
Begain	-0.00219011	6.79389	0.000696643	0.978943	1.23013	6.79389	215.473	8.78973e-49	0.00441992	0.407693	0.980276	0
Bend4	-0.142571	6.62443	2.54022	0.11098	-0.122004	6.62443	1.86014	0.172609	0.0533249	-0.0345501	0.132115	0.198478
Bend5	-0.382522	5.15309	3.44462	0.0634578	-0.138632	5.15309	0.450873	0.501921	0.131637	-0.0342594	0.0789179	0.525734
Bend7	0.0969489	4.77648	0.466392	0.494652	0.120286	4.77648	0.719059	0.396453	-0.0253851	0.0529794	0.519479	0.422962
Bet1	0.312954	3.95358	2.80929	0.0937197	0.0749517	3.95358	0.162438	0.686922	-0.0926096	0.0298196	0.113294	0.703428
Bhlhe40	0.0232936	4.40655	0.033032	0.855781	-0.0548499	4.40655	0.183018	0.668792	-0.00844381	-0.0148325	0.864472	0.686194
Bhlhe41	-0.158019	7.78799	8.2239	0.00413422	-0.0348354	7.78799	0.399771	0.527208	0.0585155	-0.00625893	0.00628255	0.550183
Bicc1	-0.0348751	4.43812	0.0339495	0.853814	-0.140268	4.43812	0.561517	0.45365	0.00504983	-0.055587	0.862616	0.478394
Bid	0.293584	5.67806	6.76635	0.00928927	-0.0680547	5.67806	0.363312	0.546673	-0.0959351	-0.0156142	0.0131323	0.569091
Bin1	-0.377061	6.0757	14.3501	0.000151774	0.119908	6.0757	1.45138	0.228306	0.132375	0.0476158	0.00029869	0.256108
Birc6	-0.0322979	5.97846	0.107015	0.743569	-0.00416355	5.97846	0.00178074	0.96634	0.0155836	0.00428067	0.758659	0.968003
Bivm	6.27971	3.49629	275.26	8.10261e-62	-0.100248	3.49629	0.0168723	0.896651	-0.983823	-0.00113921	0	0.902906
Blcap	0.95623	6.45092	106.14	6.87162e-25	-0.569267	6.45092	37.6789	8.34006e-10	-0.303846	-0.170476	0	0
Blm	0.175791	3.83778	0.89876	0.343114	0.0458997	3.83778	0.0606505	0.805471	-0.0523929	0.0147928	0.371312	0.816547
Blmh	0.0249344	7.14784	0.0988459	0.753219	0.0229175	7.14784	0.0834688	0.772651	-0.00365874	0.0138234	0.767797	0.785393
Bloc1s1	0.411078	4.08156	5.25707	0.0218578	0.134019	4.08156	0.561856	0.453513	-0.129315	0.0600968	0.0295334	0.478303
Bloc1s5	-0.204497	5.90827	2.99575	0.0834833	-0.00633821	5.90827	0.00286914	0.957282	0.0722486	0.00523808	0.10188	0.959375
Bloc1s6	0.606443	7.37279	79.5464	4.71023e-19	0.00399721	7.37279	0.00346067	0.95309	-0.202715	0.00832801	0	0.955395
Blvra	-0.10766	5.59502	0.747496	0.38727	-0.100633	5.59502	0.652452	0.419237	0.0459414	-0.0279332	0.414887	0.445028
Blzf1	-0.132302	5.90195	1.55339	0.212636	-0.0883091	5.90195	0.691865	0.405531	0.0504562	-0.0229048	0.239787	0.432067
Bmf	0.0868597	3.99777	0.188786	0.663929	-0.345123	3.99777	3.00336	0.083092	-0.0174793	-0.113153	0.682577	0.10135
Bmpr1b	0.239766	7.44134	12.7971	0.000347156	-0.0679632	7.44134	1.02841	0.310533	-0.0786215	-0.0167685	0.000644364	0.338754
Bmpr2	0.0818087	7.1576	1.04135	0.307508	-0.0363057	7.1576	0.205181	0.650571	-0.0229757	-0.0065858	0.335281	0.668629
Bnip1	-0.112601	5.98883	1.26068	0.261523	0.076144	5.98883	0.57614	0.447829	0.044918	0.0312879	0.289702	0.472987
Bnip2	-0.0698463	4.85678	0.199653	0.655001	0.315287	4.85678	4.06016	0.0439064	0.0322134	0.121427	0.67426	0.0566537
Bnip3	-0.262238	7.55621	10.5285	0.00117546	0.0448787	7.55621	0.308488	0.57861	0.0961694	0.0214952	0.00195994	0.599836
Boc	0.141001	3.47698	0.254038	0.614246	-0.019742	3.47698	0.00508642	0.943144	-0.0365854	0.000740316	0.635142	0.946051
Bod1	0.0876643	6.98755	1.43808	0.230451	0.0566751	6.98755	0.601126	0.438149	-0.024958	0.0262713	0.257991	0.463607
Bok	-0.806876	5.58614	55.4253	9.70798e-14	-0.00781573	5.58614	0.0053528	0.941677	0.273939	0.00418928	0	0.944669
Bola3	0.0562785	4.55705	0.0923778	0.761176	-0.143429	4.55705	0.602443	0.437647	-0.00425413	-0.0362457	0.774999	0.46316
Bop1	0.340963	4.95729	5.74139	0.0165697	-0.169483	4.95729	1.41691	0.233913	-0.113241	-0.0500428	0.0227709	0.261599
Bpnt1	0.649968	8.45866	181.843	1.91909e-41	-0.0651411	8.45866	1.83072	0.176043	-0.216622	-0.0152532	0	0.202099
Bptf	0.0427125	5.77079	0.0439022	0.834036	0.0595046	5.77079	0.0849012	0.770762	-0.00994695	0.0246234	0.844024	0.78351
Brap	0.506112	5.6884	32.2341	1.3667e-08	-0.0708773	5.6884	0.630418	0.427202	-0.170359	-0.0189768	0	0.453216
Brd2	-0.0200689	8.04805	0.0864871	0.768692	-0.0600584	8.04805	0.77457	0.378807	0.0114428	-0.0141618	0.781862	0.405728
Brd4	0.0877912	6.35357	0.55137	0.457758	0.110741	6.35357	0.876928	0.349045	-0.0251229	0.0428046	0.483767	0.376836
Brd7	-0.187526	3.47999	0.906188	0.341128	0.222173	3.47999	1.27414	0.258991	0.0696624	0.0847127	0.369311	0.287061
Brd8	-0.031519	6.63599	0.111022	0.738983	-0.081154	6.63599	0.736533	0.390774	0.0158486	-0.021775	0.754433	0.417505
Brd9	0.152149	7.61173	5.22554	0.0222576	0.00758628	7.61173	0.012989	0.909262	-0.0479297	0.00974472	0.0299797	0.914565
Brdt	0.0568089	3.6761	0.0530951	0.817763	-0.364539	3.6761	2.11402	0.145955	-0.0210918	-0.109371	0.828565	0.170901
Bre	0.263742	5.04655	3.76541	0.0523232	-0.0704417	5.04655	0.268471	0.604359	-0.0822588	-0.0141201	0.0656077	0.624225
Brf1	0.503553	5.80993	20.1343	7.21911e-06	0.0524537	5.80993	0.218152	0.640452	-0.168087	0.0225737	1.67803e-05	0.659208
Bri3bp	0.0595913	7.9917	1.19945	0.273432	-0.0161481	7.9917	0.0880807	0.766632	-0.0158921	0.000781112	0.301902	0.779523
Bricd5	0.0373387	3.79966	0.0469712	0.82842	0.0138408	3.79966	0.00635948	0.936439	-0.0146554	0.00514546	0.838463	0.93952
Brox	-7.78991	4.1714	464.137	6.04942e-103	-0.737067	4.1714	2.61473	0.105876	0.995	-0.005	0	0.127192
Brpf1	0.512236	3.51649	8.17062	0.00425745	-0.0236634	3.51649	0.0170755	0.896034	-0.175107	-0.00983278	0.00647721	0.902369
Brpf3	0.235659	5.29796	3.14637	0.0760961	-0.140955	5.29796	1.12573	0.288688	-0.0740411	-0.0400507	0.0933892	0.317168
Bsdc1	-0.0808837	8.07426	2.12338	0.145067	0.00811754	8.07426	0.0213901	0.883721	0.0323344	0.00933783	0.168327	0.890693
Bsn	0.520838	4.59606	10.8724	0.000976073	0.0973827	4.59606	0.379484	0.537879	-0.160747	0.0316155	0.00161091	0.560574
Btaf1	-7.89571	5.55883	1020.43	6.5234e-224	0.130561	5.55883	0.0919465	0.761717	0.994282	0.000571523	0	0.774647
Btbd1	-9.0808	6.24234	1398.34	4.81361e-306	-0.588187	6.24234	1.62421	0.202505	0.997156	-0.00149216	0	0.229827
Btbd10	0.238018	7.89145	15.3609	8.88076e-05	-0.0302087	7.89145	0.247507	0.618836	-0.0769145	-0.00418051	0.000161091	0.637921
Btbd11	-0.125783	6.71954	2.0057	0.156709	-0.113906	6.71954	1.6447	0.199682	0.0489416	-0.032549	0.180835	0.227014
Btbd19	-0.45826	4.60634	10.3246	0.00131269	0.0111095	4.60634	0.00601494	0.938181	0.163269	0.0103589	0.0021311	0.941215
Btbd3	0.0428846	5.75206	0.177906	0.673179	0.0946794	5.75206	0.865909	0.35209	-0.0161452	0.0434979	0.69146	0.379873
Btbd6	-0.0447377	5.51764	0.157984	0.691019	-0.0140866	5.51764	0.01565	0.900444	0.0191784	0.00279009	0.708569	0.906466
Btbd7	9.92877	6.57641	216.233	5.99857e-49	1.11791	6.57641	4.1274	0.0421942	-0.996631	0.00336945	0	0.0546602
Btbd9	0.387231	4.75478	8.07061	0.00449889	0.215167	4.75478	2.49297	0.114356	-0.129803	0.081373	0.00679603	0.136528
Btc	0.313314	3.27473	1.86695	0.171825	-0.210529	3.27473	0.843467	0.358407	-0.10771	-0.0638875	0.19689	0.386038
Btg2	0.247675	3.89105	1.69141	0.193415	-0.197113	3.89105	1.06811	0.301372	-0.080606	-0.0516086	0.21944	0.329394
BX537302.1	-0.245612	5.06186	5.34259	0.0208105	-0.119648	5.06186	1.26699	0.260333	0.0878334	-0.0357474	0.0281641	0.288491
Bzrap1	-0.056824	5.71745	0.341746	0.558823	-0.119758	5.71745	1.51807	0.217912	0.0234882	-0.0340481	0.581536	0.245607
Bzw1	0.278215	7.07356	16.4771	4.92412e-05	-0.0991167	7.07356	2.09094	0.148175	-0.0920984	-0.0271147	0.000107394	0.173176
Bzw2	0.170584	7.12211	6.29164	0.0121309	0.0283471	7.12211	0.173687	0.676856	-0.0543231	0.0157164	0.016834	0.693749
C030006K11Rik	-0.166404	4.94243	2.26237	0.132551	-0.0703687	4.94243	0.404416	0.524818	0.0597692	-0.0186108	0.154889	0.548022
C030034I22Rik	1.17053	4.26856	48.8354	2.78365e-12	-0.134429	4.26856	0.635229	0.425444	-0.381718	-0.0392986	0	0.451431
C030039L03Rik	-0.747919	4.04153	16.3839	5.17225e-05	0.245831	4.04153	1.76547	0.183943	0.251425	0.0828669	0.000107394	0.210392
C130050O18Rik	-0.373489	3.88098	0.469882	0.493041	0.568894	3.88098	1.13481	0.286751	0.111625	0.168729	0.517975	0.315373
C130074G19Rik	0.00425961	5.95262	0.00177746	0.966371	-0.0892812	5.95262	0.777172	0.378008	0.00214053	-0.0254055	0.968215	0.404923
C1galt1	-0.105144	4.34011	0.29526	0.58687	0.00980614	4.34011	0.00262069	0.959172	0.0381107	0.0141203	0.608505	0.96109
C1qbp	-0.138669	5.50524	1.2767	0.258514	-0.00356033	5.50524	0.000857948	0.976633	0.0543577	0.00369733	0.286588	0.977675
C1qtnf5	0.410325	5.1278	13.0658	0.000300743	0.0376139	5.1278	0.109989	0.740157	-0.138773	0.0187492	0.000580599	0.754178
C2	0.945314	3.51214	17.0041	3.72988e-05	0.142493	3.51214	0.368471	0.543839	-0.315972	0.0546995	8.05456e-05	0.566356
C230081A13Rik	-0.094145	4.19622	0.354039	0.551835	-0.161842	4.19622	1.04559	0.306524	0.0432452	-0.0498404	0.574803	0.33464
C2cd2l	-0.108245	6.60332	1.60166	0.205668	-0.051887	6.60332	0.368112	0.544035	0.0415133	-0.0123174	0.23233	0.566554
C2cd3	-0.881271	3.36554	6.27611	0.0122376	0.0441732	3.36554	0.0112652	0.915473	0.286934	0.00504357	0.0170253	0.920142
C2cd5	-0.0226241	7.81632	0.111078	0.73892	0.00417574	7.81632	0.00377911	0.950981	0.0124662	0.00747952	0.754363	0.953512
C330018D20Rik	-0.118436	4.45828	0.520366	0.470686	-0.0569122	4.45828	0.119931	0.72911	0.040029	-0.00668354	0.496255	0.743751
C4a	2.33279	4.56865	144.649	2.56313e-33	0.662219	4.56865	11.3551	0.00075241	-0.648012	0.12978	0	0.0012451
C4b	0.36689	7.46195	31.1104	2.43766e-08	0.0750359	7.46195	1.3013	0.253976	-0.121886	0.03355	0	0.281909
C530005A16Rik	0.382025	5.44352	11.4869	0.000700866	-0.0427998	5.44352	0.144333	0.704011	-0.1295	-0.00836167	0.00120147	0.719933
C530008M17Rik	-0.191737	7.48417	7.73564	0.00541413	0.0407585	7.48417	0.349518	0.554386	0.0706008	0.020521	0.00811497	0.576502
C630020P19Rik	0.229862	5.84054	4.87894	0.0271863	0.0605049	5.84054	0.337708	0.561155	-0.0852894	0.0232914	0.0359703	0.583106
C77080	-0.171849	5.51539	1.98852	0.158496	0.113962	5.51539	0.874663	0.349668	0.0623909	0.0468164	0.182694	0.377524
C920025E04Rik	1.31024	3.51448	23.2401	1.42987e-06	-0.331445	3.51448	1.46057	0.22684	-0.403778	-0.095588	3.35607e-06	0.254719
CAAA01201205.1	1.26699	4.78168	86.7646	1.22237e-20	0.306926	4.78168	5.02474	0.0249877	-0.406966	0.0921129	0	0.0335942
Caap1	0.231252	3.98859	1.23509	0.26642	-0.22227	3.98859	1.1363	0.286436	-0.0830992	-0.0645139	0.294663	0.315047
Cab39	-0.0769504	8.13422	1.45338	0.227987	-0.0346997	8.13422	0.295502	0.586716	0.0318071	-0.00535419	0.255407	0.607542
Cab39l	0.210065	6.88608	7.41191	0.00647936	-0.0651017	6.88608	0.711973	0.398789	-0.0669182	-0.0151862	0.00944732	0.425301
Cables1	0.0597545	5.63812	0.20031	0.654471	-0.172108	5.63812	1.66423	0.197033	-0.014421	-0.0526309	0.673713	0.22437
Cabp7	0.0373117	5.61184	0.125244	0.723415	-0.0350162	5.61184	0.11036	0.739734	-0.00749535	-0.0057939	0.739284	0.753816
Cacfd1	0.349812	7.61231	32.2572	1.35056e-08	-0.0278423	7.61231	0.204365	0.651221	-0.115605	-0.00323002	0	0.669223
Cachd1	-0.0929812	6.10698	0.859779	0.353801	-0.120444	6.10698	1.44289	0.229673	0.0375324	-0.0357424	0.381799	0.257377
Cacna1a	-0.0139246	7.08965	0.0260404	0.871802	-0.137426	7.08965	2.53533	0.111324	0.00962539	-0.0407541	0.879692	0.133259
Cacna1c	0.0232031	8.48007	0.165188	0.684425	-0.0342019	8.48007	0.358997	0.549064	-0.00326116	-0.00492162	0.702431	0.571474
Cacna1g	-0.155845	9.30141	23.0917	1.54457e-06	-0.0312123	9.30141	0.926229	0.335845	0.0586692	-0.00426591	3.35607e-06	0.363516
Cacna1h	-0.0346223	6.98575	0.177147	0.673837	-0.131177	6.98575	2.54214	0.110844	0.0152602	-0.0379703	0.692148	0.132739
Cacna1i	0.129922	5.49994	1.69666	0.192726	-0.0414113	5.49994	0.172188	0.678175	-0.0406406	-0.00818987	0.218755	0.695071
Cacna2d4	0.32035	4.16994	2.20311	0.137732	0.00376072	4.16994	0.000353794	0.984993	-0.0956089	0.00927095	0.160507	0.985643
Cacng2	-0.011115	5.39694	0.0119458	0.912967	-0.0119516	5.39694	0.0137969	0.906495	0.00766055	0.0038744	0.918666	0.912048
Cacng3	-0.0296499	4.54201	0.0461501	0.829903	0.0618198	4.54201	0.200033	0.654694	0.020604	0.025181	0.839943	0.672629
Cacng4	0.156253	5.53753	1.45853	0.227163	0.110796	5.53753	0.731942	0.392255	-0.0540838	0.0422778	0.254591	0.418813
Cacng5	0.0916624	4.81519	0.453323	0.500761	-0.0554899	4.81519	0.16637	0.683358	-0.0239275	-0.0146137	0.525671	0.700048
Cacul1	3.26491	5.2343	550.366	1.04812e-121	-0.0478927	5.2343	0.0993722	0.752584	-0.81178	-0.00253744	0	0.765854
Cacybp	0.0570143	5.45431	0.33947	0.560135	-0.15359	5.45431	2.46726	0.11624	-0.0189796	-0.0468702	0.582784	0.138488
Cadm1	-0.309324	8.36127	36.416	1.59393e-09	0.0954239	8.36127	3.46744	0.062588	0.110061	0.0391106	0	0.0782366
Cadm3	0.0916503	6.96315	1.47775	0.224126	0.0697731	6.96315	0.856713	0.35466	-0.0262629	0.0316179	0.251608	0.382346
Cadm4	0.131413	8.57029	7.85462	0.00506909	-0.0473305	8.57029	1.01893	0.312773	-0.0405125	-0.00962752	0.00759142	0.340986
Cadps2	-0.117402	7.23571	3.30199	0.0691962	0.0272083	7.23571	0.177359	0.673652	0.045173	0.0158931	0.0857374	0.690732
Cage1	0.620173	4.90592	20.004	7.72808e-06	-0.00724153	4.90592	0.00266113	0.958858	-0.201424	0.00500063	1.67803e-05	0.960791
Calb1	0.0384184	7.83108	0.368565	0.543787	0.0217714	7.83108	0.118423	0.730751	-0.00745496	0.0152442	0.567303	0.745288
Calca	-0.84492	3.7587	17.2213	3.32678e-05	-0.226061	3.7587	1.23097	0.267218	0.266622	-0.0706799	7.38334e-05	0.295585
Calcr	-0.794929	6.02356	21.4537	3.62477e-06	-4.10001	6.02356	606.314	7.08765e-134	0.0599233	-0.870164	1.34243e-05	0
Cald1	-0.0828239	4.74456	0.251313	0.616152	-0.211383	4.74456	1.63554	0.200939	0.0327929	-0.0547698	0.636934	0.228246
Calm1	0.176245	10.5954	49.1969	2.31511e-12	-0.0359432	10.5954	2.04661	0.152546	-0.0563775	-0.00593002	0	0.177774
Calr	-0.0123857	9.68531	0.126716	0.721862	0.00427197	9.68531	0.0150782	0.902271	0.00870032	0.00840259	0.737764	0.908215
Camk1	-0.110211	6.18129	1.12123	0.289654	0.0264478	6.18129	0.0646041	0.799362	0.0424801	0.0164515	0.317722	0.810852
Camk1g	-0.202902	6.45415	4.08423	0.0432853	-0.116175	6.45415	1.33953	0.247117	0.0732096	-0.0336861	0.0551234	0.274949
Camk2a	-0.2462	6.87496	9.21074	0.00240599	-0.0549399	6.87496	0.45895	0.498115	0.0868939	-0.00845567	0.00373866	0.522059
Camk2b	-0.0662341	8.7263	1.79934	0.179792	0.0346936	8.7263	0.493695	0.482284	0.0278132	0.018734	0.205415	0.506252
Camk2d	-0.0543666	9.77713	2.02986	0.154234	0.00290748	9.77713	0.00580552	0.939265	0.0238674	0.00760171	0.178167	0.942279
Camk2g	-0.563506	7.21622	59.7459	1.07932e-14	-0.0346845	7.21622	0.226603	0.634054	0.197172	-0.00534644	0	0.652802
Camk2n1	-1.83244	7.89698	174.19	8.99864e-40	0.0688996	7.89698	0.25849	0.61116	0.55287	0.0205135	0	0.63045
Camk2n2	-0.0403351	4.94068	0.117321	0.731959	-0.0686541	4.94068	0.339153	0.560318	0.0203502	-0.0104508	0.747567	0.58223
Camk4	0.867656	3.61582	14.2127	0.000163269	0.170319	3.61582	0.537951	0.463283	-0.280315	0.0530212	0.00033225	0.487562
Camkk1	-0.256087	7.50138	14.4513	0.000143833	-0.0473957	7.50138	0.495225	0.481606	0.0933367	-0.00965778	0.000291978	0.505625
Camkk2	0.439446	4.20292	6.70089	0.00963647	-0.259324	4.20292	2.32826	0.127044	-0.156691	-0.0775851	0.013629	0.150207
Camsap2	-0.108793	8.62976	3.29188	0.0696234	-0.0497899	8.62976	0.689512	0.406331	0.0420205	-0.0102245	0.0862106	0.432778
Camta1	0.00395242	9.57777	0.0106938	0.917637	-0.0707668	9.57777	3.42747	0.0641201	0.00307637	-0.018222	0.922938	0.0799348
Camta2	-0.243663	8.20351	20.7386	5.26448e-06	-0.0115773	8.20351	0.0468334	0.828668	0.089089	0.00279932	1.34243e-05	0.838426
Cant1	0.162432	4.55462	0.755452	0.384756	-0.0389294	4.55462	0.0427465	0.836203	-0.0518431	0.0068028	0.412346	0.845745
Canx	0.205459	9.27639	20.7565	5.21547e-06	0.0368128	9.27639	0.666673	0.414214	-0.0664298	0.0192778	1.34243e-05	0.440363
Capn2	0.143798	7.87341	4.55968	0.0327333	-0.0206957	7.87341	0.0945075	0.758523	-0.0445143	-0.00118191	0.0426455	0.771761
Capn3	0.0468901	4.50553	0.0813522	0.775473	-0.295805	4.50553	3.20829	0.0732659	-0.0167269	-0.0950695	0.788356	0.0902849
Capns1	-0.919211	9.41743	498.388	2.13123e-110	-0.0182685	9.41743	0.198339	0.656065	0.312017	0.000509771	0	0.673982
Caprin1	0.030244	5.44677	0.101185	0.750412	-0.0812791	5.44677	0.73037	0.392763	-0.00698529	-0.0173413	0.765136	0.419277
Capza1	7.36398	4.4802	545.546	1.17224e-120	-0.0488695	4.4802	0.00401809	0.949457	-0.993212	-0.000458631	0	0.952196
Car10	0.0580172	7.50999	0.984445	0.321104	-0.0192753	7.50999	0.108651	0.741685	-0.0156189	2.57979e-05	0.349084	0.755595
Car13	0.0989432	4.23367	0.247735	0.618674	0.0118375	4.23367	0.00355838	0.952433	-0.024301	0.00973007	0.639283	0.95479
Car2	0.383539	9.64926	112.143	3.32442e-26	-0.0537367	9.64926	2.20408	0.137646	-0.127635	-0.0120302	0	0.161591
Car3	0.384293	4.34343	2.29168	0.130069	0.0295842	4.34343	0.0143139	0.904768	-0.123494	0.00852895	0.152221	0.91046
Car8	0.556712	6.23818	24.4884	7.47593e-07	0.0159353	6.23818	0.0201595	0.887093	-0.181979	0.0137529	0	0.893932
Carf	-1.14981	4.58171	57.8109	2.88562e-14	0.0916292	4.58171	0.363646	0.546489	0.379969	0.0304398	0	0.568907
Carkd	0.0662184	7.3065	0.89046	0.345353	-0.0210022	7.3065	0.0895672	0.764728	-0.0180539	-0.00127366	0.37347	0.777714
Cars	-0.255081	7.14534	12.7597	0.000354166	-0.0786297	7.14534	1.21253	0.270831	0.0923883	-0.0202791	0.000651077	0.299153
Cars2	0.134401	5.6525	1.23877	0.265707	-0.0989408	5.6525	0.671778	0.412432	-0.0393838	-0.0283092	0.293917	0.438601
Cartpt	-0.103045	5.58917	0.0752859	0.783791	-0.11255	5.58917	0.0893939	0.764949	0.0338393	-0.0260103	0.796196	0.777919
Casc1	0.432226	3.89639	4.51541	0.0335908	0.107517	3.89639	0.278604	0.597618	-0.13911	0.040124	0.0436792	0.617805
Casc4	0.135972	9.16373	19.3614	1.0817e-05	-0.0658679	9.16373	4.54314	0.033051	-0.0425928	-0.0160247	2.34925e-05	0.0433771
Casd1	1.70702	6.49684	276.308	4.78751e-62	-0.010912	6.49684	0.0115659	0.914357	-0.526192	0.00288247	0	0.919105
Casp7	0.550911	3.29333	5.23422	0.0221468	-0.0995762	3.29333	0.170983	0.67924	-0.178172	-0.0301271	0.0298522	0.696024
Casp8	0.104852	3.6067	0.238828	0.625054	0.301294	3.6067	1.94235	0.163413	-0.0257799	0.0975429	0.645428	0.189024
Casp8ap2	0.389951	5.31031	8.86592	0.00290544	0.0413084	5.31031	0.0995006	0.75243	-0.129705	0.0204206	0.00446357	0.765696
Casp9	-7.94272	5.45767	883.871	3.14918e-194	-0.91711	5.45767	4.20343	0.0403424	0.992259	-0.0054476	0	0.0523748
Casq2	0.486608	4.94608	6.60331	0.0101789	-0.0182004	4.94608	0.00939129	0.922799	-0.153311	-0.0039924	0.014327	0.926922
Casz1	-0.403422	4.04839	5.42265	0.0198772	-0.316331	4.04839	3.33008	0.0680235	0.135212	-0.0900932	0.0269291	0.0843849
Cat	0.139694	7.54265	6.14517	0.0131771	-0.0338974	7.54265	0.361912	0.547446	-0.0429451	-0.00537389	0.0182335	0.56983
Catsper2	0.0550204	3.99005	0.053347	0.817338	0.622417	3.99005	6.47964	0.0109117	-0.0115936	0.206203	0.828213	0.0155889
Cav2	-0.424697	4.33248	5.42568	0.0198427	-0.150509	4.33248	0.677296	0.410519	0.150123	-0.0404198	0.0268787	0.436815
Cbfa2t2	-6.44524	7.84776	38.5338	5.38136e-10	-0.53799	7.84776	0.431903	0.511057	0.747398	0.00789009	0	0.534816
Cbfa2t3	-0.0502095	3.58534	0.0337439	0.854253	0.125616	3.58534	0.21263	0.644714	0.0108798	0.0452979	0.862972	0.663061
Cbl	0.279548	6.06146	8.09495	0.00443888	-0.0385112	6.06146	0.153498	0.695215	-0.0924946	-0.00474293	0.00671213	0.711493
Cbll1	0.138882	5.76913	2.03774	0.153437	-0.228557	5.76913	5.51909	0.0188101	-0.0456394	-0.0728267	0.177294	0.0256538
Cbln1	-0.513686	5.27151	17.3243	3.1513e-05	0.0522268	5.27151	0.18	0.671373	0.185727	0.0293592	7.38334e-05	0.688624
Cbr1	1.4279	6.87945	215.457	8.85846e-49	0.180337	6.87945	3.48792	0.061818	-0.447893	0.0545735	0	0.0773808
Cbs	0.0851553	5.59369	0.317741	0.572968	-0.219771	5.59369	2.11681	0.14569	-0.0207461	-0.0630234	0.595084	0.170646
Cbwd1	0.232712	5.58565	4.80571	0.0283655	-0.0639947	5.58565	0.362798	0.546956	-0.0796397	-0.0106525	0.0374302	0.569377
Cbx1	-0.408427	5.83226	12.5291	0.000400664	0.10964	5.83226	0.90247	0.34212	0.142796	0.0421663	0.000721554	0.369889
Cc2d1a	0.0467982	7.30702	0.368152	0.544013	-0.0500274	7.30702	0.420802	0.516537	-0.0107497	-0.0110028	0.56748	0.540041
Ccar1	-0.111373	4.41277	0.492212	0.482942	0.0162456	4.41277	0.0104132	0.918721	0.0401022	0.0159296	0.5083	0.923069
Ccdc106	-0.107992	5.16834	0.696605	0.403927	-0.215343	5.16834	2.77273	0.0958822	0.0420834	-0.0706388	0.43107	0.116059
Ccdc108	0.0284938	3.71346	0.00986565	0.920879	-0.078465	3.71346	0.072257	0.788079	-0.0111788	-0.0167128	0.926106	0.799754
Ccdc111	-0.170755	4.17587	0.863177	0.352851	-0.0822899	4.17587	0.200645	0.654201	0.06007	-0.0190558	0.380917	0.672176
Ccdc117	0.858184	5.16354	49.3494	2.14196e-12	-0.0587755	5.16354	0.230699	0.631006	-0.282918	-0.0149206	0	0.649714
Ccdc12	-0.934553	4.14882	22.4915	2.11073e-06	-0.240609	4.14882	1.48864	0.222427	0.30997	-0.0725204	3.35607e-06	0.250144
Ccdc126	0.121071	5.17832	1.07707	0.299354	-0.179386	5.17832	2.36445	0.124128	-0.0385271	-0.057993	0.327458	0.147059
Ccdc127	-2.147	8.06861	1291.23	9.11051e-283	0.031309	8.06861	0.276131	0.599248	0.634219	0.0106037	0	0.619301
Ccdc130	-0.2588	4.38425	2.46422	0.116465	0.0112295	4.38425	0.004511	0.946451	0.0827606	0.00049695	0.137978	0.949387
Ccdc134	0.0664141	5.54785	0.274298	0.600463	-0.197848	5.54785	2.43017	0.11902	-0.0204707	-0.0595716	0.621755	0.141445
Ccdc135	0.0621325	4.86668	0.148021	0.700434	0.142266	4.86668	0.778544	0.377587	-0.00795439	0.0531293	0.717533	0.40451
Ccdc141	1.38337	5.80408	144.051	3.46246e-33	-0.0559377	5.80408	0.235423	0.627532	-0.441503	-0.0136486	0	0.646288
Ccdc148	0.395829	6.08542	15.1868	9.73807e-05	0.0925326	6.08542	0.830417	0.362152	-0.129774	0.0386897	0.000198008	0.389408
Ccdc163	0.152853	3.31618	0.354553	0.551547	0.158507	3.31618	0.381684	0.536703	-0.0416596	0.057336	0.574525	0.559453
Ccdc17	0.162594	3.69387	0.865153	0.352301	0.0718648	3.69387	0.168997	0.681004	-0.0477613	0.032424	0.380417	0.697736
Ccdc181	0.315168	4.29115	3.96449	0.0464695	0.0839134	4.29115	0.280346	0.596475	-0.103431	0.0374113	0.0587613	0.616717
Ccdc24	0.134714	5.18482	1.56031	0.211619	-0.0740969	5.18482	0.471967	0.492084	-0.0449609	-0.0198656	0.238613	0.515938
Ccdc28a	0.313222	7.81174	22.2304	2.41811e-06	0.0196689	7.81174	0.0878047	0.766987	-0.103022	0.0137524	3.35607e-06	0.779886
Ccdc28b	0.474262	6.64436	25.536	4.34201e-07	-0.0179729	6.64436	0.0367573	0.84796	-0.157203	0.000124164	0	0.856605
Ccdc32	0.379313	6.56434	22.6743	1.91921e-06	-0.00356699	6.56434	0.00199943	0.964335	-0.126683	0.00537985	3.35607e-06	0.966141
Ccdc34	0.122913	5.08331	1.42677	0.232292	-0.136014	5.08331	1.74684	0.186275	-0.0364782	-0.0346153	0.259941	0.213046
Ccdc41	-0.119111	6.77592	1.93119	0.164628	0.0701496	6.77592	0.670145	0.413001	0.0452179	0.0320798	0.189436	0.439181
Ccdc43	0.124694	5.07812	1.06449	0.302193	-0.0353561	5.07812	0.0857406	0.769664	-0.0326636	-0.00878639	0.33017	0.782446
Ccdc47	-0.230641	4.62452	2.59309	0.10733	0.089191	4.62452	0.386243	0.534281	0.100337	0.0336208	0.128054	0.556979
Ccdc50	0.0495682	8.77281	1.18398	0.276548	-0.0291948	8.77281	0.410734	0.521597	-0.0119316	-0.00339507	0.305137	0.544867
Ccdc55	0.474455	6.38126	18.3183	1.86898e-05	-0.121937	6.38126	1.21149	0.271037	-0.156114	-0.0344171	4.36288e-05	0.299341
Ccdc58	0.235429	3.54417	1.09188	0.296055	0.0220752	3.54417	0.00973173	0.921417	-0.0825971	0.0176597	0.324146	0.925609
Ccdc73	0.323117	4.80536	4.55601	0.0328034	0.0854448	4.80536	0.319513	0.571901	-0.10895	0.0421493	0.0427227	0.593332
Ccdc84	0.0802764	4.3503	0.217392	0.641034	0.154629	4.3503	0.806171	0.369255	-0.0239562	0.0594951	0.66093	0.396348
Ccdc85c	0.151203	6.2555	1.85951	0.172681	0.117721	6.2555	1.12855	0.288085	-0.0437633	0.0485979	0.19784	0.316591
Ccdc88a	0.0231964	9.19584	0.318596	0.572453	0.0231921	9.19584	0.318551	0.57248	-0.00273025	0.0149999	0.594581	0.593866
Ccdc88c	-0.153973	5.02193	0.781015	0.376831	0.0603346	5.02193	0.119462	0.729619	0.0589097	0.0243481	0.404594	0.744201
Ccdc9	-0.34291	5.41124	5.9679	0.0145686	-0.150072	5.41124	1.14278	0.285066	0.121987	-0.0441682	0.0200391	0.313661
Ccdc90b	0.1809	4.30729	1.11052	0.291968	0.138491	4.30729	0.649573	0.420265	-0.0660602	0.051779	0.320001	0.446098
Ccdc91	-0.411208	8.46495	48.2413	3.76867e-12	-0.00251312	8.46495	0.00180526	0.966109	0.145738	0.0054771	0	0.967788
Ccdc93	-0.104784	7.67245	2.50424	0.11354	0.0375417	7.67245	0.321476	0.570722	0.0410157	0.0195723	0.134887	0.592181
Cckbr	-0.084217	5.21325	0.58194	0.445553	-0.0973864	5.21325	0.778261	0.377674	0.0329486	-0.0277437	0.47142	0.404567
Ccl27a	1.0837	3.66878	27.5715	1.51389e-07	-0.0388389	3.66878	0.0399517	0.841575	-0.360839	-0.0126093	0	0.850766
Ccm2l	0.509468	3.47656	5.16626	0.0230298	0.608642	3.47656	7.3983	0.00652854	-0.163366	0.216658	0.030906	0.00967889
Ccna2	0.103354	4.71689	0.545581	0.460129	-0.0441371	4.71689	0.0997615	0.752116	-0.0236175	-0.00981315	0.4862	0.765424
Ccnd1	0.259361	6.98285	11.0448	0.000889387	0.00504314	6.98285	0.00418975	0.94839	-0.0842325	0.00873883	0.00150016	0.951156
Ccnd2	-0.0683973	4.77219	0.203459	0.651943	0.0654438	4.77219	0.186567	0.665789	0.0207569	0.0237525	0.671327	0.683318
Ccndbp1	0.183058	8.86088	12.7954	0.000347482	-0.0398969	8.86088	0.607969	0.435554	-0.058181	-0.00706731	0.000644364	0.461221
Ccne1	0.0343712	4.74502	0.0481052	0.826394	0.0139713	4.74502	0.0079423	0.928987	-0.00290656	0.00828332	0.836469	0.932617
Ccng2	0.431915	4.5606	10.5711	0.0011487	-0.242123	4.5606	3.31125	0.0688072	-0.15457	-0.0666116	0.00192974	0.0852743
Ccnh	0.143716	5.72552	1.62338	0.202621	-0.0559199	5.72552	0.245487	0.620271	-0.0411716	-0.00788515	0.229236	0.63927
Ccni	-1.04979	8.51789	263.232	3.38953e-59	0.0369558	8.51789	0.330279	0.565495	0.351264	0.0161878	0	0.587368
Ccnl2	0.0213706	8.08213	0.154159	0.694592	-0.0111481	8.08213	0.0419483	0.837718	-0.00370392	0.00292952	0.711993	0.847192
Ccnt2	-0.0152133	6.99478	0.0428249	0.836055	-0.0248587	6.99478	0.114378	0.735214	0.00936444	-0.00246318	0.845812	0.749396
Ccnyl1	-5.79169	4.65451	485.741	1.20395e-107	-0.215712	4.65451	0.387781	0.533468	0.968042	-0.00432972	0	0.556164
Ccr5	-0.0170889	4.99171	0.0164111	0.898065	-0.106411	4.99171	0.635932	0.425188	0.0111701	-0.0314842	0.904527	0.451183
Ccrl1	0.0722158	3.58466	0.112042	0.737832	-0.318127	3.58466	2.1009	0.147213	-0.0264373	-0.0981991	0.75338	0.172146
Ccrn4l	-0.246119	5.52392	4.76166	0.0291005	0.204865	5.52392	3.29908	0.0693185	0.0863047	0.0746293	0.0383598	0.0858381
Ccser2	8.13916	5.06609	827.585	5.42776e-182	-1.57032	5.06609	9.44083	0.00212208	-0.991166	-0.00883382	0	0.00346346
Cct2	0.0925538	9.84429	7.9743	0.0047446	-0.0294635	9.84429	0.808172	0.368661	-0.0273004	-0.0036373	0.00711486	0.395737
Cct4	-0.00716625	7.62117	0.0143209	0.904745	-0.177485	7.62117	8.78674	0.00303428	0.00712144	-0.0546186	0.910967	0.0048965
Cct5	0.00193325	9.40112	0.00229735	0.961771	0.00278565	9.40112	0.00476705	0.944955	0.00381406	0.0074779	0.963963	0.947981
Ccz1	0.0244687	5.58476	0.0441243	0.833622	0.0536155	5.58476	0.212113	0.645117	-0.00219386	0.0257359	0.843597	0.66339
Cd109	-0.526045	3.21356	2.97299	0.0846655	0.263838	3.21356	0.743838	0.388434	0.166136	0.0874326	0.103162	0.415162
Cd164l2	0.312731	4.23186	3.37458	0.0662094	-0.274791	4.23186	2.60376	0.106611	-0.106085	-0.0870669	0.0821061	0.128034
Cd200	0.0353206	8.44755	0.617807	0.431863	0.0150995	8.44755	0.112906	0.736859	-0.00735279	0.0116419	0.458163	0.751077
Cd2ap	0.29824	6.98476	16.1108	5.97433e-05	-0.0230902	6.98476	0.0966904	0.755838	-0.097338	-0.00137887	0.00011075	0.769083
Cd2bp2	0.307976	4.04455	4.43676	0.0351729	0.0429136	4.04455	0.0861554	0.769123	-0.100128	0.018022	0.045676	0.781879
Cd320	0.132686	5.54965	1.21485	0.270374	-0.225875	5.54965	3.52135	0.0605832	-0.0370311	-0.0683511	0.298737	0.0759545
Cd3eap	-0.0250877	3.83235	0.020627	0.8858	-0.00851991	3.83235	0.00233243	0.961481	0.0214025	0.00686522	0.893113	0.963318
Cd47	-0.229763	7.38919	9.16971	0.00246054	0.0369576	7.38919	0.237312	0.626155	0.0830631	0.0196865	0.00382927	0.644999
Cd55	0.357692	4.15871	4.14678	0.0417138	0.178192	4.15871	1.03257	0.309556	-0.111908	0.0692625	0.053301	0.337754
Cd59a	0.548152	6.53725	26.9569	2.08042e-07	-0.0827124	6.53725	0.615072	0.432884	-0.18144	-0.0205748	0	0.458717
Cd63	-0.417532	5.78175	10.3575	0.00128948	0.0543167	5.78175	0.175486	0.675281	0.143909	0.0209225	0.00210425	0.692262
Cd68	-0.167601	4.21747	0.790606	0.373917	0.0148268	4.21747	0.00617072	0.937387	0.0697113	0.0118083	0.401728	0.940426
Cd72	0.000497208	6.92896	4.02615e-05	0.994937	-0.00753857	6.92896	0.00945248	0.922549	0.00559093	0.0030838	0.995211	0.92669
Cd74	-0.269986	4.32647	1.3064	0.253047	0.0948058	4.32647	0.161562	0.687723	0.0958975	0.0565176	0.281107	0.704173
Cd81	-0.294666	3.33199	1.92473	0.165336	0.407365	3.33199	3.67808	0.0551323	0.108545	0.143963	0.190202	0.0698229
Cd82	0.427056	6.92777	30.5789	3.20555e-08	-0.0770431	6.92777	0.995477	0.318407	-0.142519	-0.0205147	0	0.3465
Cd97	0.00405146	5.97922	0.00116062	0.972823	-0.0736907	5.97922	0.392206	0.531142	0.00720426	-0.0167735	0.974407	0.553959
Cdadc1	0.134061	3.6698	0.298212	0.585006	-0.135431	3.6698	0.303237	0.58186	-0.0415632	-0.0331644	0.606565	0.602857
Cdan1	-0.443468	9.3452	124.35	7.06031e-29	-0.0245345	9.3452	0.381229	0.536946	0.156852	-0.00202179	0	0.559694
Cdc14b	-0.0329493	4.22375	0.0122052	0.912031	-0.344397	4.22375	1.34889	0.245472	0.0062069	-0.0982392	0.917934	0.273261
Cdc16	0.263011	7.88939	23.1622	1.48892e-06	-0.0221208	7.88939	0.16393	0.685563	-0.0864552	-0.00173423	3.35607e-06	0.702203
Cdc23	-0.0695451	6.53298	0.693182	0.405084	0.0166569	6.53298	0.0397554	0.84196	0.0301149	0.0122723	0.432278	0.851122
Cdc27	-0.130171	6.95951	2.88836	0.089222	0.0221283	6.95951	0.0834567	0.772667	0.0505112	0.0142791	0.108351	0.78541
Cdc37	-0.0876895	6.22956	0.858855	0.354059	0.136611	6.22956	2.08584	0.14867	0.0333079	0.0557666	0.382095	0.173747
Cdc42	0.105589	9.90194	9.64427	0.00189943	-0.056477	9.90194	2.75942	0.0966832	-0.0316205	-0.0130309	0.00300032	0.116929
Cdc42bpb	-0.0820467	7.90524	1.70802	0.191242	0.104197	7.90524	2.75429	0.0969936	0.0335894	0.0419143	0.217339	0.117355
Cdc42ep2	-0.186462	5.42575	2.78292	0.0952741	0.00197459	5.42575	0.000311705	0.985914	0.0689107	0.00553761	0.115086	0.986525
Cdc42se2	7.19647	7.1982	148.673	3.38028e-34	-0.289298	7.1982	0.312192	0.576338	-0.978223	-0.00335025	0	0.597601
Cdc5l	-0.859254	6.93158	67.1351	2.53527e-16	0.0370063	6.93158	0.125518	0.723125	0.289525	0.0169945	0	0.738116
Cdc73	-0.12037	6.77933	1.93884	0.163794	0.0713446	6.77933	0.681206	0.409172	0.0478902	0.0334067	0.188483	0.435453
Cdca4	-0.036865	4.68595	0.0618463	0.803601	0.0060405	4.68595	0.00165547	0.967545	0.0196283	0.00796461	0.815175	0.969107
Cdh10	-0.0579031	5.91129	0.353759	0.551993	0.0761084	5.91129	0.611221	0.434328	0.024918	0.0341324	0.574958	0.460039
Cdh11	5.8781	5.91688	813.661	5.77932e-179	-0.0914582	5.91688	0.14745	0.700984	-0.966499	-0.00148946	0	0.717007
Cdh12	0.0534886	5.83546	0.378261	0.538535	0.0246035	5.83546	0.0799833	0.77732	-0.013651	0.014729	0.562131	0.789796
Cdh13	-0.487153	6.37528	24.9484	5.88862e-07	-0.10951	6.37528	1.26136	0.261394	0.171654	-0.0308612	0	0.289662
Cdh2	-0.0116567	6.90833	0.0139095	0.906116	0.0628307	6.90833	0.404378	0.524837	0.00786354	0.0262016	0.912215	0.548042
Cdh22	0.168925	5.14407	1.6814	0.194739	-0.0448211	5.14407	0.11798	0.731236	-0.055237	-0.000536583	0.220893	0.745771
Cdh23	0.210304	6.11594	4.15514	0.0415082	0.0908542	6.11594	0.775452	0.378536	-0.0664179	0.0363466	0.0530292	0.40545
Cdh24	0.2121	3.54837	0.849242	0.356767	0.224381	3.54837	0.950855	0.329502	-0.0665613	0.0797262	0.384716	0.35733
Cdh7	-0.0443582	6.81925	0.236648	0.626638	-0.141968	6.81925	2.42364	0.119517	0.0196753	-0.0425934	0.646952	0.141938
Cdk10	-0.102154	6.25464	0.95727	0.327876	-0.10348	6.25464	0.982276	0.321637	0.0406043	-0.0296375	0.355964	0.349672
Cdk11b	0.0195562	4.59768	0.0109587	0.916627	-0.0346133	4.59768	0.0344956	0.852656	-0.00096357	-0.00879617	0.921958	0.861012
Cdk13	-2.86834	3.9391	127.57	1.39365e-29	-0.0524902	3.9391	0.0404083	0.840684	0.750028	0.00525184	0	0.84997
Cdk14	0.105451	9.71752	7.47194	0.00626681	-0.0381107	9.71752	0.976039	0.323179	-0.0312266	-0.00658884	0.00920233	0.351165
Cdk17	0.115663	9.00603	8.54489	0.00346494	0.0177569	9.00603	0.201435	0.653565	-0.0355893	0.0129469	0.00531265	0.671579
Cdk18	-0.0475934	7.00251	0.397662	0.528299	-0.00273971	7.00251	0.00131635	0.971058	0.0212406	0.00582427	0.552163	0.972336
Cdk2ap1	3.28581	5.06497	233.725	9.18547e-53	0.110071	5.06497	0.270283	0.603142	-0.801537	0.0252743	0	0.623023
Cdk4	6.73288	5.41209	947.62	4.3653e-208	-0.0945819	5.41209	0.0898695	0.764343	-0.9822	-0.00185924	0	0.777345
Cdk5	0.0118198	5.63782	0.0113627	0.915109	-0.029256	5.63782	0.0696828	0.791799	0.00227553	-0.00119097	0.920498	0.803355
Cdk5r1	0.0290465	8.28255	0.282091	0.595334	-0.0738037	8.28255	1.82078	0.177221	-0.00627254	-0.018486	0.616825	0.203354
Cdk5rap3	0.0439362	6.84695	0.211372	0.645694	-0.0533967	6.84695	0.312321	0.576259	-0.00994672	-0.0123404	0.665286	0.597514
Cdk8	-2.80671	5.63177	361.987	1.03967e-80	0.0747883	5.63177	0.250116	0.616993	0.746596	0.01548	0	0.636293
Cdkl1	0.107599	6.6287	1.48979	0.222248	-0.0775876	6.6287	0.774837	0.378725	-0.0316652	-0.0204965	0.249728	0.405658
Cdkl2	-0.0229039	6.09242	0.0518867	0.819812	-0.110261	6.09242	1.20163	0.272996	0.0136716	-0.032413	0.830455	0.301355
Cdkl3	0.037945	3.60725	0.0284934	0.865954	0.139054	3.60725	0.382378	0.536333	-0.0189398	0.0572811	0.874137	0.559134
Cdkn1a	-0.742607	4.01348	21.1312	4.28896e-06	0.0940702	4.01348	0.3353	0.562555	0.249186	0.0361944	1.34243e-05	0.584449
Cdkn1b	-0.0304137	7.44954	0.251785	0.615821	0.0180272	7.44954	0.0884551	0.76615	0.0147593	0.0122263	0.636595	0.779057
Cdkn2aipnl	0.0738315	6.79494	0.747425	0.387293	-0.036819	6.79494	0.185948	0.666311	-0.0204278	-0.0068025	0.414917	0.683865
Cdon	0.0304487	4.17669	0.0297234	0.863119	0.148609	4.17669	0.70173	0.402203	-0.0116384	0.0569892	0.871359	0.428778
Cds2	-5.07243	4.16247	134.876	3.51523e-31	0.137049	4.16247	0.121924	0.726957	0.925217	-0.0136268	0	0.741737
Cdv3	0.846686	7.76509	223.058	1.94671e-50	0.0308016	7.76509	0.295802	0.586526	-0.28015	0.0161511	0	0.607327
Cdyl	0.121269	4.3733	0.493068	0.482562	-0.0622068	4.3733	0.130043	0.718387	-0.0472938	-0.0249625	0.5079	0.733552
Cdyl2	-0.298234	5.77567	8.1946	0.00420153	-0.128855	5.77567	1.52915	0.21624	0.106522	-0.0354769	0.0063933	0.244033
Ceacam1	-0.0215002	5.16921	0.00364823	0.951837	-0.073324	5.16921	0.0423866	0.836885	0.00966642	-0.0144181	0.954743	0.846373
Ceacam2	0.529928	4.25988	2.85264	0.0912241	0.116825	4.25988	0.138563	0.709714	-0.147138	0.0418471	0.110562	0.725497
Cebpg	0.437988	7.61484	42.5373	6.93474e-11	0.0188317	7.61484	0.0787951	0.778937	-0.146219	0.0126599	0	0.791327
Cecr2	-0.621494	4.07433	8.40354	0.00374492	0.146381	4.07433	0.466773	0.494476	0.218875	0.0542105	0.00574223	0.518254
Cecr5	0.026366	5.70912	0.0658979	0.797406	-0.272675	5.70912	7.02666	0.00803052	-0.00702305	-0.0898432	0.809416	0.0116959
Celf2	0.202651	8.16734	13.7897	0.000204458	-0.00888277	8.16734	0.0265125	0.870655	-0.0648538	0.00279912	0.000385947	0.878349
Celf4	-0.00779198	9.06059	0.0466209	0.829051	-0.0457852	9.06059	1.60909	0.204619	0.00861722	-0.0106868	0.839127	0.232065
Celsr1	-0.175224	3.40092	0.32246	0.570133	0.304098	3.40092	0.992288	0.319184	0.0556442	0.10029	0.592215	0.347249
Celsr2	-0.149285	6.25348	2.21438	0.13673	0.0410172	6.25348	0.167181	0.68263	0.0551118	0.0192226	0.15941	0.69933
Cend1	-0.119264	7.19543	2.66483	0.102589	-0.0775443	7.19543	1.12657	0.288508	0.0455117	-0.0204958	0.122762	0.31699
Cenpc1	0.105518	6.975	1.49006	0.222208	0.0150789	6.975	0.0304448	0.861485	-0.0334485	0.0120848	0.249661	0.869728
Cenpo	-0.244819	5.87224	7.31102	0.00685332	0.121451	5.87224	1.799	0.179834	0.0888712	0.0505693	0.0100313	0.206109
Cenpq	0.0410718	4.74692	0.0664742	0.796541	0.230204	4.74692	2.08578	0.148676	-0.0103626	0.0855759	0.808624	0.173747
Cep120	0.624699	5.24514	22.9988	1.62099e-06	-0.104145	5.24514	0.63806	0.424414	-0.206926	-0.0314867	3.35607e-06	0.450337
Cep135	-0.0727244	4.42339	0.214365	0.643368	0.206458	4.42339	1.72333	0.189265	0.0343148	0.069101	0.663081	0.216154
Cep170	-0.0921429	8.07398	2.98819	0.0838739	-0.0140685	8.07398	0.0696724	0.791814	0.0357351	0.00139107	0.10233	0.803361
Cep170b	-0.0842559	8.67359	5.27514	0.021632	-0.0384822	8.67359	1.10038	0.294182	0.0342384	-0.00663515	0.029275	0.322531
Cep19	-0.2735	5.95014	7.74094	0.00539826	-0.193964	5.95014	3.89299	0.048488	0.0979783	-0.0597208	0.00809483	0.0620973
Cep192	0.249651	6.23187	5.74237	0.0165605	-0.128518	6.23187	1.52203	0.217312	-0.0803696	-0.0375459	0.0227642	0.245036
Cep250	-0.25524	7.1833	12.1299	0.000496205	-0.0999166	7.1833	1.85923	0.172713	0.0923518	-0.0278209	0.000882645	0.198619
Cep290	0.138102	8.37046	7.40989	0.00648664	-0.0283066	8.37046	0.311285	0.576893	-0.0428819	-0.00340001	0.00945404	0.598128
Cep44	-0.304982	5.37099	5.0094	0.02521	-0.0921863	5.37099	0.45786	0.498626	0.106351	-0.0223152	0.0335472	0.522486
Cep63	0.336348	5.65768	8.33421	0.00389054	0.083265	5.65768	0.511078	0.474672	-0.108228	0.0333485	0.00596037	0.49897
Cep68	0.000271947	6.87422	1.28492e-05	0.99714	0.0242889	6.87422	0.102092	0.749333	0.00457525	0.0149132	0.997258	0.762773
Cep70	-0.44035	5.98996	13.8671	0.000196207	0.0415735	5.98996	0.123772	0.724979	0.151406	0.0181513	0.000375879	0.739935
Cep76	0.0662312	5.16848	0.274375	0.600412	-0.0840342	5.16848	0.441504	0.506398	-0.0208143	-0.0239145	0.621671	0.530104
Cep85	0.133204	4.18508	0.565542	0.452036	-0.334364	4.18508	3.55638	0.0593169	-0.0472023	-0.100255	0.477847	0.0745818
Cep85l	0.214825	5.51656	3.55387	0.0594066	-0.0133091	5.51656	0.0135895	0.907198	-0.0685359	0.00424405	0.0741153	0.912699
Cep97	0.283385	7.25112	18.3225	1.86493e-05	-0.0162943	7.25112	0.0606201	0.805519	-0.0928383	0.000867677	4.36288e-05	0.816608
Cerk	-0.110217	8.78804	5.34956	0.0207275	0.00383729	8.78804	0.00648341	0.935824	0.0428083	0.00766461	0.0280466	0.938957
Cers5	0.00223546	7.21011	0.000974005	0.975103	0.0193972	7.21011	0.0729219	0.787129	0.00270682	0.01328	0.976514	0.798955
Cetn3	-10.4506	6.93971	2088.67	0	-1.06335	6.93971	4.44606	0.0349819	0.999046	-0.000954198	0	0.0457465
Cfb	0.0126937	4.07486	0.00561018	0.940293	0.00951349	4.07486	0.00315724	0.955191	0.00745092	0.00495366	0.94392	0.957425
Cfdp1	0.133613	5.77754	1.7375	0.187456	0.0531004	5.77754	0.274373	0.600413	-0.0389227	0.0214797	0.213325	0.620355
Cfh	-4.81085	3.73054	170.949	4.59109e-39	-0.0126792	3.73054	0.0138916	0.906176	0.927583	0.00412658	0	0.911799
Cfl2	0.00345114	7.93219	0.00453064	0.946335	0.00945922	7.93219	0.0340432	0.853615	0.00395946	0.00985914	0.949703	0.861921
Cgnl1	0.0665027	6.48724	0.406095	0.523958	-0.14479	6.48724	1.92318	0.165506	-0.0215398	-0.0449561	0.547988	0.191141
Cgrrf1	0.277772	5.30333	3.01839	0.0823254	-0.154147	5.30333	0.93119	0.334554	-0.0891642	-0.0480615	0.100558	0.362351
Chac1	0.0743064	4.97908	0.337886	0.561052	0.24605	4.97908	3.69954	0.0544275	-0.0218544	0.0895803	0.58367	0.0689738
Champ1	0.0294005	7.69963	0.232249	0.629861	-0.0452725	7.69963	0.550695	0.458034	-0.0051407	-0.00884183	0.65004	0.482565
Chchd3	-0.0462709	4.9587	0.124062	0.72467	0.11984	4.9587	0.83298	0.361412	0.0197428	0.0459429	0.74058	0.38872
Chchd6	-0.000515983	5.66764	2.22662e-05	0.996235	-0.189982	5.66764	3.10737	0.0779386	0.00269411	-0.0596164	0.996342	0.0956814
Chd1	0.0609177	6.48923	0.437443	0.508359	0.129208	6.48923	1.96666	0.160803	-0.0193479	0.0519814	0.53292	0.186419
Chd2	-0.00177216	6.82695	0.000470634	0.982692	-0.030896	6.82695	0.143256	0.705065	0.00492756	-0.00360752	0.983733	0.720889
Chd3	0.0767947	10.2227	6.15382	0.0131129	-0.00457417	10.2227	0.0218305	0.882539	-0.0219232	0.00515862	0.0181462	0.889559
Chd4	0.166395	8.82386	9.7899	0.00175473	-0.0342809	8.82386	0.4156	0.519141	-0.0529453	-0.00498338	0.00278889	0.542448
Chd6	0.0444807	4.86192	0.0676659	0.794766	-0.123245	4.86192	0.519006	0.471266	-0.00777679	-0.0361186	0.806801	0.495543
Chd7	-0.215824	3.97839	1.23964	0.265541	0.306121	3.97839	2.50469	0.113508	0.0775142	0.114898	0.293753	0.135457
Chd8	-0.111403	7.51997	2.74011	0.0978582	0.0107189	7.51997	0.0253821	0.873419	0.0439212	0.0109493	0.117768	0.881024
Chd9	-0.257012	3.52127	1.39583	0.237423	-0.0437266	3.52127	0.0401744	0.84114	0.0983246	-0.0130397	0.265223	0.850383
Chi3l1	-0.56991	4.39445	10.709	0.00106618	0.236545	4.39445	1.8446	0.174413	0.194766	0.0904569	0.00176193	0.200384
Chmp1a	-0.264286	7.40571	17.9279	2.29432e-05	-0.0637938	7.40571	1.04479	0.306709	0.0952804	-0.0143462	5.70531e-05	0.334821
Chmp2a	-0.132297	7.58131	3.93934	0.0471693	0.00926283	7.58131	0.0193164	0.889463	0.0513342	0.00982147	0.0596239	0.896194
Chmp4b	-1.29884	8.61947	47.8709	4.55217e-12	-0.0464731	8.61947	0.0630918	0.801674	0.405559	-0.00906984	0	0.813037
Chmp5	-0.181099	6.56354	3.88548	0.0487053	0.130982	6.56354	2.0324	0.153977	0.0678262	0.0522727	0.0614261	0.179221
Chn1	-0.233537	8.77004	28.0849	1.1611e-07	-0.0597479	8.77004	1.83884	0.175087	0.0853083	-0.0139892	0	0.201152
Chp1	-0.137143	9.58305	18.2119	1.97637e-05	-0.00334894	9.58305	0.0108615	0.916996	0.0521588	0.00541831	5.0341e-05	0.921471
Chpf	-0.0434651	5.93305	0.163657	0.685812	0.00621391	5.93305	0.00333839	0.953925	0.0192215	0.0081411	0.703794	0.956247
Chpf2	0.0260162	6.07288	0.0698401	0.79157	0.186355	6.07288	3.58203	0.0584077	-0.00353302	0.0703788	0.803536	0.0734643
Chpt1	0.369965	8.57516	62.964	2.10516e-15	-0.00878891	8.57516	0.0355081	0.850535	-0.122817	0.00378665	0	0.858908
Chrd	-0.181929	3.43996	0.751809	0.385904	0.333286	3.43996	2.53472	0.111367	0.0645711	0.12457	0.413548	0.133313
Chrm2	0.0443194	6.51497	0.220336	0.638784	-0.0349303	6.51497	0.136921	0.711362	-0.0110849	-0.00650547	0.658759	0.727001
Chrm3	-0.2612	5.72923	7.85712	0.0050621	0.0318868	5.72923	0.117134	0.732164	0.0947029	0.0156614	0.00757799	0.746614
Chrna3	0.142814	4.48444	0.79294	0.373213	0.0532198	4.48444	0.110537	0.739533	-0.0500159	0.0313659	0.401013	0.753655
Chrna6	-0.675083	5.69002	34.0133	5.4737e-09	0.0846913	5.69002	0.537514	0.463465	0.227138	0.0333282	0	0.487697
Chrna7	-0.0329718	4.40304	0.0460198	0.83014	-0.100564	4.40304	0.426467	0.513728	0.0207767	-0.0248993	0.840167	0.53742
Chrnb1	0.380728	3.46203	2.93661	0.0865922	0.0431025	3.46203	0.0368123	0.847848	-0.110914	0.0184706	0.105364	0.856501
Chrnb2	0.169422	4.63865	1.28693	0.256615	0.0065943	4.63865	0.00196847	0.964612	-0.0546628	0.0141745	0.284567	0.966409
Chrnb3	-0.341736	5.19196	7.66101	0.00564268	0.100863	5.19196	0.66896	0.413414	0.128628	0.0491193	0.00842708	0.439537
Chrnb4	0.0505399	4.80763	0.0966991	0.755827	0.160995	4.80763	0.984804	0.321016	-0.0115034	0.0655956	0.770153	0.349071
Chst10	-0.0578558	7.84512	1.2285	0.2677	0.0142526	7.84512	0.0745643	0.784803	0.024658	0.011569	0.295918	0.796797
Chst11	-0.0862833	3.4719	0.112966	0.736793	0.180274	3.4719	0.486014	0.485711	0.0482499	0.0751355	0.75246	0.50981
Chst2	-0.290612	8.76952	39.0954	4.03593e-10	-0.015632	8.76952	0.113197	0.736533	0.104822	0.00115726	0	0.750735
Chst3	1.32872	3.80324	19.0938	1.24448e-05	-0.588887	3.80324	3.78024	0.0518612	-0.382157	-0.138231	3.69167e-05	0.0660239
Chst8	-0.13791	6.83405	2.45605	0.117073	0.0421611	6.83405	0.22955	0.631858	0.0532963	0.0215747	0.138595	0.650597
Chsy1	-1.15459	4.2098	54.0813	1.92364e-13	0.0791414	4.2098	0.249193	0.617644	0.381639	0.0346882	0	0.636904
Chtop	-0.0697612	6.98427	0.945649	0.330829	-0.0302284	6.98427	0.177497	0.673533	0.0279838	-0.00207396	0.358851	0.690574
Chuk	-8.85939	5.61177	851.975	2.70455e-187	1.31788	5.61177	6.6926	0.00968137	0.996693	0.00330688	0	0.0139512
Cib2	0.11194	5.92465	1.23753	0.265948	0.103028	5.92465	1.04823	0.305916	-0.0347734	0.0427021	0.294186	0.334076
Cic	-0.00844669	4.25633	0.00183971	0.965788	-0.23103	4.25633	1.39274	0.237942	0.00581245	-0.0648105	0.967684	0.265602
Cit	0.184323	9.40343	20.5354	5.85396e-06	-0.0107824	9.40343	0.0703023	0.790897	-0.0589161	0.00245572	1.34243e-05	0.802418
Ckap4	0.198726	6.06546	3.82398	0.0505241	0.0822752	6.06546	0.656031	0.417965	-0.0642468	0.0370633	0.0635874	0.443809
Ckb	-0.129091	9.0254	11.18	0.00082684	-0.0304794	9.0254	0.623301	0.429823	0.0494988	-0.00389429	0.00139948	0.455814
Ckmt1	0.0309267	9.63302	1.10244	0.29373	-0.0181117	9.63302	0.378103	0.53862	-0.00598609	0.000328958	0.32184	0.561245
Clasp1	0.377785	7.75063	43.0407	5.36134e-11	-0.0331238	7.75063	0.331046	0.565044	-0.125314	-0.0046951	0	0.586899
Clasrp	-0.074227	4.07131	0.139075	0.709202	0.241705	4.07131	1.4721	0.225015	0.0358582	0.0919404	0.725581	0.252745
Clcn2	-0.286982	3.24793	1.45098	0.228371	-0.181943	3.24793	0.582402	0.445372	0.10641	-0.0537716	0.255826	0.470789
Clcn3	0.00718243	8.9272	0.0230027	0.87945	-0.0115545	8.9272	0.0595248	0.807249	0.00227579	0.00267246	0.887028	0.818222
Clcn4-2	0.329177	8.00975	44.1192	3.08979e-11	-0.0346144	8.00975	0.487956	0.484841	-0.108393	-0.00570837	0	0.50886
Clcn6	0.162074	6.08817	2.67161	0.102153	-0.0275691	6.08817	0.0773213	0.780961	-0.0518541	-0.00390088	0.122275	0.793179
Clcn7	0.0418995	7.07756	0.347713	0.555411	-0.0570768	7.07756	0.645108	0.421867	-0.0107726	-0.0125122	0.57823	0.44781
Cldn12	-0.168614	8.63093	16.2891	5.43753e-05	-0.0133936	8.63093	0.102796	0.748499	0.063006	0.00200033	0.000107394	0.761954
Cldn25	0.595103	8.86458	224.561	9.1542e-51	-0.0149864	8.86458	0.142589	0.705721	-0.198569	0.00146937	0	0.721551
Clgn	0.327454	5.40362	9.9398	0.00161743	0.00851567	5.40362	0.00668437	0.934839	-0.111878	0.00695026	0.00260431	0.93804
Clic1	0.248793	4.71108	1.1056	0.293041	-0.329071	4.71108	1.93346	0.16438	-0.0811013	-0.106058	0.321125	0.190057
Clic4	0.124825	8.46161	8.11826	0.00438216	-0.0283645	8.46161	0.419209	0.517332	-0.038881	-0.00313117	0.00663494	0.540719
Clic5	0.0107984	5.06381	0.00801133	0.92868	-0.114721	5.06381	0.904455	0.34159	0.00319677	-0.03202	0.933211	0.369385
Clint1	-0.446485	6.88787	29.857	4.65103e-08	-0.0566081	6.88787	0.480331	0.488272	0.157051	-0.0131773	0	0.512256
Clip1	-0.141404	5.95765	1.76919	0.183483	0.033806	5.95765	0.101016	0.750614	0.0525279	0.0166219	0.20915	0.764022
Clip2	-0.070425	8.54044	1.92488	0.16532	-0.0257367	8.54044	0.257071	0.612139	0.0293945	-0.00220995	0.190188	0.631424
Clip3	0.0841803	9.36778	5.2513	0.0219304	0.0269581	9.36778	0.538575	0.463024	-0.0240108	0.0160977	0.0296072	0.487331
Clk1	-0.224107	6.24275	6.10998	0.0134421	-0.274153	6.24275	9.14563	0.00249313	0.0813135	-0.0901441	0.0185423	0.00406755
Clk2	0.0354384	5.07153	0.0802998	0.776892	-0.112451	5.07153	0.812557	0.367365	-0.0036668	-0.0382106	0.789692	0.394516
Clk4	-0.286788	5.66025	5.73383	0.0166411	-0.0251561	5.66025	0.0442007	0.833481	0.104053	-0.00203808	0.0228414	0.843057
Clmn	0.0703735	9.33139	3.92703	0.0475157	-0.0195379	9.33139	0.302707	0.58219	-0.0191573	6.17214e-05	0.0600031	0.603149
Clmp	-0.479502	6.54092	25.2902	4.93213e-07	0.0289139	6.54092	0.0919161	0.761755	0.168968	0.0153491	0	0.774684
Cln3	-0.209722	4.66446	1.53177	0.215847	-0.183628	4.66446	1.17644	0.278081	0.071878	-0.0588951	0.243241	0.306489
Clock	-0.0249279	7.25713	0.0992651	0.752713	-0.026953	7.25713	0.116005	0.733409	0.0136016	-0.00241575	0.767337	0.747755
Clp1	0.0643003	4.79612	0.182399	0.66932	-0.0221775	4.79612	0.021718	0.88284	-0.0201324	-0.00255202	0.687799	0.889877
Clpb	0.129418	5.01723	0.980651	0.322038	-0.0847743	5.01723	0.420419	0.516728	-0.0418316	-0.0206655	0.350075	0.540219
Clptm1	0.110347	6.36964	1.50843	0.219378	0.156951	6.36964	3.05238	0.0806188	-0.0326026	0.0618235	0.246829	0.0986415
Clstn1	-0.0828758	9.50761	4.57523	0.0324374	-0.0263743	9.50761	0.463387	0.496045	0.0334205	-0.00253164	0.0423032	0.519945
Clstn2	-0.319265	8.95486	66.6898	3.17783e-16	-0.0139364	8.95486	0.127117	0.72144	0.114939	0.00190878	0	0.736492
Clstn3	-0.0234009	10.174	0.469199	0.493356	0.0432675	10.174	1.60402	0.205334	0.0127357	0.0215443	0.518297	0.23279
Cluap1	0.051895	5.3698	0.126268	0.722333	0.261967	5.3698	3.21972	0.0727563	-0.0145792	0.0938174	0.73821	0.0896673
Cluh	0.153483	7.34327	4.04807	0.0442219	0.0782788	7.34327	1.05299	0.304819	-0.048187	0.0332161	0.0561872	0.332975
Clvs1	0.0249221	6.14339	0.0617199	0.803798	-0.0340079	6.14339	0.115029	0.73449	-0.00401452	-0.00524513	0.815359	0.748812
Cmas	0.0586619	9.16113	2.90776	0.0881545	-0.00909355	9.16113	0.0698766	0.791517	-0.0155163	0.00344903	0.107119	0.803066
Cmbl	0.06895	3.49857	0.101022	0.750606	0.132703	3.49857	0.373577	0.541061	-0.00807188	0.0502844	0.765327	0.563675
Cml1	-1.0012	4.62751	30.9462	2.65284e-08	-0.0587048	4.62751	0.105524	0.745298	0.323727	-0.00938027	0	0.759004
Cmpk2	-0.0959217	5.50536	0.613943	0.433307	0.0423158	5.50536	0.119425	0.729659	0.0365069	0.019876	0.459576	0.744261
Cmss1	-0.425062	4.94972	7.72685	0.00544056	-0.0743098	4.94972	0.236337	0.626865	0.145068	-0.0252757	0.00814853	0.64566
Cmtm5	0.219224	7.5269	10.7207	0.00105943	0.0388519	7.5269	0.33674	0.561717	-0.0714105	0.0198266	0.00175858	0.583647
Cmtm6	-0.095215	5.75798	1.08496	0.29759	0.0975412	5.75798	1.13862	0.285944	0.0382942	0.0408189	0.32575	0.314547
Cmtm7	-0.0280356	4.04946	0.0198037	0.888087	-0.336825	4.04946	2.9422	0.0862931	0.017887	-0.106751	0.894955	0.105025
Cmtm8	0.197061	3.5096	0.896838	0.343631	-0.291428	3.5096	1.95695	0.16184	-0.0646664	-0.0942492	0.371849	0.187581
Cnbd2	-0.275486	5.91146	8.23128	0.00411746	0.0836494	5.91146	0.758998	0.383642	0.0992014	0.0359094	0.00626913	0.41046
Cnep1r1	0.207874	4.94452	2.59119	0.10746	-0.0175509	4.94452	0.0185208	0.891749	-0.0660822	-0.00877159	0.128155	0.898392
Cnih	-7.05994	5.37363	341.559	2.91915e-76	-0.029109	5.37363	0.00496063	0.94385	0.983753	-0.000711024	0	0.946857
Cnih4	-0.341116	5.97669	17.3833	3.05496e-05	0.0105662	5.97669	0.0166114	0.897448	0.12224	0.0101701	7.38334e-05	0.903644
Cnot1	0.286345	5.19763	0.363775	0.546417	0.530666	5.19763	1.24985	0.263582	-0.0593036	0.151801	0.56982	0.29186
Cnot2	0.114861	5.68525	0.844261	0.358181	-0.114409	5.68525	0.838141	0.359929	-0.034058	-0.0345495	0.386119	0.387448
Cnot4	0.0613001	6.69002	0.472291	0.491935	-0.0111914	6.69002	0.0157145	0.900241	-0.0146027	0.00457374	0.516878	0.906262
Cnot6	-2.96584	4.42052	120.528	4.84851e-28	0.0906156	4.42052	0.112568	0.737239	0.753847	0.0145858	0	0.751436
Cnot6l	-0.0921947	6.52508	1.2215	0.269067	-0.136728	6.52508	2.68729	0.101152	0.0346991	-0.0415679	0.297451	0.121949
Cnp	-0.126988	8.45505	6.48607	0.0108723	0.0143701	8.45505	0.0830784	0.773168	0.0486225	0.0114307	0.0152735	0.785883
Cnpy2	-0.218279	7.14772	8.43357	0.00368355	0.0226061	7.14772	0.090463	0.763589	0.0802844	0.0143896	0.00564826	0.776513
Cnpy3	-0.0707404	5.37001	0.484447	0.486415	-0.116621	5.37001	1.31658	0.251206	0.0301318	-0.0338846	0.511672	0.279121
Cnr1	-0.158693	6.04653	2.58979	0.107554	-0.13797	6.04653	1.95781	0.161748	0.0597577	-0.0416603	0.128265	0.187473
Cnrip1	0.113533	3.53952	0.268786	0.604147	-0.285936	3.53952	1.70571	0.191543	-0.0386013	-0.0953303	0.625161	0.218685
Cntd1	-0.0161144	7.04569	0.049121	0.8246	0.035607	7.04569	0.239811	0.624343	0.0104887	0.0191982	0.834764	0.643314
Cntfr	-0.15732	6.33529	2.26765	0.1321	-0.0417135	6.33529	0.159707	0.689427	0.0589626	-0.0102732	0.154406	0.705871
Cntln	-0.140727	5.1823	1.06415	0.30227	-0.0967456	5.1823	0.503835	0.47782	0.0493489	-0.0294954	0.330254	0.50195
Cntn1	0.0808429	11.2466	13.4494	0.000245083	-0.021524	11.2466	0.95345	0.328843	-0.0232372	-0.000912343	0.000453069	0.356679
Cntn2	-0.0775912	8.47931	2.83707	0.0921121	-0.011577	8.47931	0.0631653	0.801561	0.031964	0.00278066	0.111499	0.812893
Cntn4	0.0957473	7.64126	1.72885	0.188558	0.0942691	7.64126	1.67574	0.195491	-0.0286928	0.0388669	0.214479	0.222739
Cntn6	-0.00846498	5.72036	0.00745123	0.931212	0.143095	5.72036	2.12795	0.144634	0.00713878	0.0562518	0.93553	0.169303
Cntnap1	0.328204	8.36222	41.3027	1.30391e-10	0.0249113	8.36222	0.238114	0.625572	-0.108192	0.0155787	0	0.644499
Cntnap2	-0.13324	5.80736	2.11854	0.145525	0.10256	5.80736	1.25541	0.262522	0.0503703	0.0429499	0.168817	0.29079
Cntnap3	-0.0089839	3.84226	0.000933033	0.975632	-0.162161	3.84226	0.261892	0.608823	0.0148521	-0.0474922	0.977058	0.628349
Cntnap5a	0.0990106	6.22172	1.06287	0.302562	-0.0765845	6.22172	0.635977	0.425171	-0.0294625	-0.0199141	0.330549	0.451166
Cntrob	0.00884405	5.16808	0.00601297	0.938191	0.172818	5.16808	2.27166	0.131758	0.00187601	0.0661652	0.941943	0.155329
Cobl	0.218942	5.81418	3.63894	0.056443	-0.422284	5.81418	13.5311	0.000234649	-0.0685396	-0.134863	0.0707459	0.000372523
Coch	1.05268	3.11166	21.7014	3.1856e-06	-0.454597	3.11166	3.98684	0.0458569	-0.337878	-0.135159	6.71213e-06	0.0589761
Cog1	-0.313355	3.85029	2.30126	0.129269	-0.0366579	3.85029	0.0316656	0.858764	0.107363	-0.00483629	0.151362	0.867036
Cog2	0.0863098	6.59562	0.938558	0.332649	0.173826	6.59562	3.80714	0.0510345	-0.0245799	0.0663406	0.360653	0.0651379
Cog6	-0.0585563	7.56402	0.816815	0.366113	-0.0183888	7.56402	0.0805377	0.77657	0.0249265	0.000921785	0.394015	0.789098
Coil	-0.0895262	6.79858	1.19449	0.274426	-0.06148	6.79858	0.563514	0.452848	0.035211	-0.0157577	0.302902	0.477612
Col11a1	-0.426646	5.73561	10.3604	0.0012875	-0.0662358	5.73561	0.250131	0.616983	0.151789	-0.014331	0.0021009	0.63628
Col11a2	-0.228396	6.26907	3.80271	0.0511697	-0.139369	6.26907	1.41642	0.233994	0.0825454	-0.0417707	0.0643223	0.261672
Col16a1	0.253654	6.46209	6.00607	0.0142567	0.124847	6.46209	1.45581	0.227598	-0.0805583	0.0483757	0.019643	0.25541
Col1a2	-0.249519	4.36625	0.813028	0.367226	-0.291113	4.36625	1.11106	0.291851	0.0824339	-0.090055	0.395059	0.320363
Col24a1	-0.926704	3.50859	7.51989	0.00610214	0.0576482	3.50859	0.0281656	0.86672	0.290719	0.0317182	0.00902782	0.874658
Col27a1	-0.0119929	4.95272	0.00437666	0.947253	-0.0375882	4.95272	0.0431203	0.835499	0.00656905	-0.00390051	0.950488	0.84503
Col4a2	0.0643926	7.50681	0.756415	0.384453	-0.103176	7.50681	1.9417	0.163484	-0.0175703	-0.0287946	0.412118	0.189124
Col4a3bp	-5.18625	5.15572	291.313	2.57273e-65	0.769116	5.15572	5.91665	0.0149985	0.933495	0.0383304	0	0.020868
Col8a1	0.204081	5.34234	4.37179	0.0365386	-0.0044747	5.34234	0.0020678	0.96373	-0.0671039	0.00619535	0.0472635	0.965584
Col9a2	0.437479	5.29746	5.66365	0.01732	0.0919291	5.29746	0.250887	0.616451	-0.139538	0.0397826	0.0236972	0.635713
Colgalt2	0.421669	5.35674	12.4699	0.000413564	-0.139617	5.35674	1.3673	0.242276	-0.140879	-0.0418646	0.00074169	0.269942
Commd1	0.0265551	5.12649	0.0611213	0.804732	-0.566506	5.12649	27.8175	1.33316e-07	-0.00522995	-0.190029	0.816185	0
Commd10	-0.225649	4.26352	1.15706	0.282076	-0.0934433	4.26352	0.198171	0.656201	0.0926209	-0.0263106	0.310456	0.674103
Commd2	0.157377	6.51852	2.77619	0.0956755	-0.0676902	6.51852	0.51353	0.473615	-0.0490336	-0.0154537	0.115566	0.497953
Commd9	0.27471	7.31555	13.6531	0.000219873	-0.0929265	7.31555	1.56302	0.211224	-0.0901787	-0.0256792	0.000416152	0.238734
Comtd1	0.248702	4.28551	2.44973	0.117545	0.0344487	4.28551	0.0474829	0.827503	-0.0819166	0.0218892	0.139092	0.837308
Copb1	0.238748	7.88002	15.3301	9.02644e-05	0.0599736	7.88002	0.967864	0.325213	-0.0779303	0.0274325	0.000167803	0.353222
Copb2	0.0573956	9.15064	1.71761	0.190001	-0.014095	9.15064	0.103578	0.747577	-0.0150804	0.00189667	0.21598	0.761199
Coprs	0.113769	7.69757	2.42563	0.119365	0.0413307	7.69757	0.320236	0.571466	-0.0343298	0.0209679	0.140988	0.592882
Cops2	0.491652	5.6816	26.2388	3.01694e-07	-0.200073	5.6816	4.33895	0.0372498	-0.16161	-0.0602963	0	0.0485388
Cops3	0.711867	6.74279	54.0703	1.93443e-13	-0.152259	6.74279	2.48285	0.115094	-0.23526	-0.0442403	0	0.137233
Cops5	4.81945	7.53845	659.398	2.01943e-145	-0.328543	7.53845	3.54528	0.0597151	-0.926136	-0.0124798	0	0.0750248
Cops7a	0.127656	7.59576	3.72726	0.0535313	-0.0134486	7.59576	0.041359	0.838847	-0.0392331	0.00248651	0.0671716	0.848209
Cops7b	0.0609626	4.11082	0.170555	0.679619	-0.0168918	4.11082	0.0132247	0.908446	-0.0120288	-0.0080435	0.697776	0.913793
Cops8	-0.0334442	7.79774	0.432847	0.510595	0.0244575	7.79774	0.231504	0.630411	0.0158127	0.0152513	0.535081	0.649164
Copz2	0.397338	4.48145	4.1364	0.0419703	0.0411653	4.48145	0.0444134	0.833086	-0.122292	0.0276746	0.0536433	0.842735
Coq10a	0.126469	6.70715	1.7222	0.18941	-0.00927891	6.70715	0.00926994	0.923298	-0.0380673	0.00340184	0.215419	0.927358
Coq10b	-0.321247	6.27882	13.6344	0.000222078	-0.0609168	6.27882	0.490119	0.483874	0.116749	-0.013902	0.000422864	0.50781
Coq2	9.61986	5.13681	921.409	2.17715e-202	0.0414373	5.13681	2.11347e-10	0.999988	-1	0	0	0.999762
Coq5	0.117178	5.98924	0.897826	0.343365	0.123346	5.98924	0.994658	0.318607	-0.0352225	0.0479225	0.37158	0.346675
Coro1a	0.00141823	5.66997	0.000100006	0.992021	0.260651	5.66997	3.55365	0.0594145	0.00344216	0.0978377	0.992399	0.0746825
Coro1c	3.27229	5.8836	322.984	3.24361e-72	0.0595162	5.8836	0.110885	0.739138	-0.80415	0.00834103	0	0.753272
Coro2a	0.0575608	6.93878	0.655293	0.418227	0.0109175	6.93878	0.0235769	0.877966	-0.0148783	0.0111514	0.445058	0.88529
Coro2b	0.0955901	7.95704	2.92972	0.0869623	-0.01405	7.95704	0.0632677	0.801404	-0.0288741	0.00212657	0.105827	0.812748
Cox11	-0.0298565	4.17806	0.0359208	0.849679	0.0883217	4.17806	0.317683	0.573003	0.0010877	0.039679	0.858653	0.594336
Cox14	-0.155983	7.18275	4.55611	0.0328015	0.0497585	7.18275	0.463727	0.495887	0.0579129	0.0240117	0.042716	0.519767
Cox17	0.220569	4.33932	2.02725	0.1545	0.00963802	4.33932	0.00388877	0.950276	-0.0692023	0.012318	0.178378	0.952918
Cox18	-0.544877	4.77403	9.61088	0.00193428	0.360597	4.77403	4.21669	0.0400283	0.177068	0.122224	0.00306409	0.051972
Cox19	-0.440165	7.23715	29.1751	6.61225e-08	0.0288942	7.23715	0.125981	0.722636	0.154906	0.0169905	0	0.73765
Cox5b	-7.92995	3.5804	328.898	1.67039e-73	0.115608	3.5804	6.72252e-10	0.999979	1	0	0	0.999758
Cox7a2	-8.65162	5.6404	852.609	1.96937e-187	1.59304	5.6404	9.92812	0.00162773	0.993413	0.00658656	0	0.00267814
Cox7a2l	8.47401	6.38617	1249.31	1.16938e-273	-0.113967	6.38617	0.0814718	0.775313	-0.996023	-0.000750841	0	0.787856
Cox8a	7.94397	9.97013	5284.79	0	-0.0959831	9.97013	0.586592	0.44374	-0.991805	-0.000504752	0	0.469104
Cpd	-0.169372	7.62497	6.85499	0.00883941	0.056804	7.62497	0.771051	0.379892	0.0635841	0.0256629	0.0125517	0.406765
[truncated: 5,417 more rows]

## Sheet: HYP_LowFat
genes	AG_logFC	AG_logCPM	AG_LR	AG_pval	PO_logFC	PO_logCPM	PO_LR	PO_pval	AGE	POE	AG_adj_pval	PO_adj_pval
[truncated: 6,761 more rows]

[truncated: 6 more sheets: HYP_Females, HYP_Males, HYP_HF, HYP_HM, HYP_LF, HYP_LM]
