# Supplementary material for: Genetic, epigenetic, and environmental mechanisms govern allele-specific gene expression
Source: HighWire-hosted journal article supplement (doi:10.1101/gr.276193.121), 2022-05-02
Supplement: Supplemental_Table_S3.xlsx [file Supplemental_Table_S3.xlsx]

## Sheet: README
Supplemental Table S3: Allele-specific expression analyses for all contexts in LIV.
Full summary statistics for all environmental context analyses in LIV. Each gene’s allelic genotype (AG) and parent-of-origin (PO) effects on ASE were jointly estimated with a generalized linear model and the magnitude of its ASE biases were quantified (see Methods). For both AG and PO terms, the tables include the log2 fold-changes, log2 counts-per-million, likelihood ratios, raw p-values, effec…
Each sheet contains a separate diet-by-sex context analysis.
LIV_ALL	All contexts collapsed in LIV
LIV_HighFat	High fat-fed diet in LIV
LIV_LowFat	Low fat-fed diet in LIV
LIV_Females	Females in LIV
LIV_Males	Males in LIV
LIV_HF	High fat-fed females in LIV
LIV_HM	High fat-fed males in LIV
LIV_LF	Low fat-fed females in LIV
LIV_LM	Low fat-fed males in LIV

## Sheet: LIV_All
genes	AG_logFC	AG_logCPM	AG_LR	AG_pval	PO_logFC	PO_logCPM	PO_LR	PO_pval	AGE	POE	AG_adj_pval	PO_adj_pval
0610008F07Rik	-1.04136	2.98639	42.1455	8.47301e-11	-0.0103627	2.98639	0.0040791	0.949075	0.340246	0.0389166	0	0.951824
0610009B22Rik	0.0697098	5.61609	1.56343	0.211164	-0.034159	5.61609	0.375417	0.540066	-0.0254945	-0.0435321	0.232278	0.559761
0610009O20Rik	-0.0590178	6.90363	2.70694	0.0999123	0.0297213	6.90363	0.686542	0.407343	0.0205123	-0.0123116	0.115685	0.430021
0610010K14Rik	0.119394	4.51559	1.61866	0.203279	-0.0968288	4.51559	1.06605	0.301839	-0.0404424	-0.0111285	0.224264	0.325056
0610012H03Rik	0.213583	4.17762	7.5489	0.00600466	0.0238434	4.17762	0.0937922	0.75941	-0.0817513	0.0143083	0.00813937	0.772134
0610038P03Rik	-0.031408	2.52419	0.0510399	0.821264	-0.213713	2.52419	2.311	0.128461	0.000646153	-0.0199007	0.828575	0.147007
0610043K17Rik	-2.20867	4.36621	350.664	3.03771e-78	0.172831	4.36621	2.16365	0.141309	0.629608	0.0251962	0	0.161353
1100001G20Rik	-0.178534	11.734	50.1187	1.44724e-12	-0.0164826	11.734	0.427431	0.513252	0.0613211	-0.00616514	0	0.533637
1110004E09Rik	0.232571	5.31822	7.43459	0.00639818	0.00338622	5.31822	0.00160624	0.968031	-0.0832399	0.00484311	0.00867011	0.969586
1110008F13Rik	-0.0132928	8.40173	0.155252	0.693566	0.00121088	8.40173	0.00128693	0.971383	0.00443502	-0.00608594	0.706877	0.972734
1110032A03Rik	0.451893	6.10846	30.6003	3.17045e-08	0.0473139	6.10846	0.336258	0.561997	-0.153836	0.041711	0	0.581222
1110034G24Rik	-2.62535	3.44164	360.317	2.4016e-80	0.0865108	3.44164	0.387911	0.533399	0.722801	-0.0158423	0	0.553315
1110035H17Rik	0.0941032	2.77601	0.281054	0.596011	0.408476	2.77601	5.19034	0.0227127	-0.0158926	0.103494	0.612555	0.0292961
1110038B12Rik	-0.215908	4.2478	5.03872	0.0247868	-0.226235	4.2478	5.53748	0.0186134	0.0693755	-0.0019728	0.0312205	0.0244181
1110057K04Rik	-0.253491	6.72917	28.6273	8.77357e-08	-0.0904957	6.72917	3.65016	0.0560638	0.0841917	0.00988891	0	0.0675823
1110059E24Rik	0.386371	5.7444	63.4875	1.6139e-15	-0.0959625	5.7444	3.9157	0.0478371	-0.132151	-0.00211547	0	0.0581627
1110059G10Rik	0.355504	3.78769	13.2355	0.00027469	0.0976128	3.78769	0.996065	0.318265	-0.121623	-0.030102	0.000478072	0.341254
1190002N15Rik	-0.462242	7.30351	89.9724	2.41501e-21	-0.0500566	7.30351	1.057	0.3039	0.157654	0.0158108	0	0.327175
1200014J11Rik	0.267016	2.41303	2.56946	0.108945	0.115881	2.41303	0.485031	0.486152	-0.0920434	0.0941888	0.12532	0.507368
1300002K09Rik	-0.573384	8.91188	278.551	1.55331e-62	0.00402318	8.91188	0.0137806	0.90655	0.195745	-0.00227322	0	0.911277
1300017J02Rik	0.0450606	9.47309	2.79992	0.0942688	0.0173974	9.47309	0.417385	0.518245	-0.0159376	0.000752979	0.109422	0.538418
1500011K16Rik	-0.851602	2.61669	31.6069	1.88754e-08	-0.36893	2.61669	5.86398	0.0154538	0.277588	-0.0794777	0	0.0204193
1500017E21Rik	6.84484	3.00968	656.099	1.05362e-144	0.68993	3.00968	3.2837	0.0699708	-0.986866	0.00343253	0	0.0831642
1600002H07Rik	-0.217529	2.45417	2.41952	0.119832	0.0975162	2.45417	0.486738	0.485386	0.0810452	0.0140142	0.137053	0.50659
1600012H06Rik	-0.173481	2.47907	0.803525	0.370042	0.137666	2.47907	0.505616	0.477043	0.0560352	0.0540328	0.392732	0.498414
1600014C10Rik	-0.0167742	8.86549	0.388833	0.532914	-0.0121626	8.86549	0.204434	0.651165	0.00551547	-0.01088	0.552318	0.667635
1700001C19Rik	0.139637	4.04491	2.0486	0.152346	-0.137878	4.04491	1.99824	0.157482	-0.0523609	-0.0234739	0.171121	0.178244
1700012B15Rik	0.0858095	4.34806	0.735829	0.391	-0.0399013	4.34806	0.159109	0.689978	-0.0342509	-0.0196793	0.41356	0.704864
1700019G17Rik	1.02255	3.12686	63.4001	1.6871e-15	-0.17133	3.12686	1.79193	0.180692	-0.330648	-0.0243893	0	0.202941
1700020I14Rik	0.0905253	7.64977	9.06694	0.00260273	0.0382353	7.64977	1.61751	0.203439	-0.0319163	0.00307989	0.00380026	0.225706
1700021K19Rik	0.0550646	6.3202	1.45971	0.226976	-0.0236425	6.3202	0.269112	0.603928	-0.0196062	-0.006107	0.248747	0.621594
1700022I11Rik	0.339379	7.22687	118.385	1.42809e-27	0.0134517	7.22687	0.185996	0.666271	-0.117195	-0.00164547	0	0.68207
1700024P16Rik	-0.701377	3.31724	15.8797	6.74973e-05	0.0188933	3.31724	0.0119543	0.912936	0.224535	-0.00839964	0.000129647	0.917002
1700025G04Rik	0.036269	4.34379	0.153894	0.694841	-0.00198871	4.34379	0.000484976	0.98243	-0.0191419	-0.0446637	0.708182	0.98313
1700034J05Rik	0.489922	3.122	11.9596	0.000543659	-0.220787	3.122	2.43489	0.118662	-0.160728	-0.0643079	0.00089132	0.136356
1700049G17Rik	0.0330702	3.55775	0.052747	0.81835	-0.0427426	3.55775	0.0889664	0.765495	-0.00765068	0.00282557	0.825881	0.778005
1700064H15Rik	0.341742	2.82112	5.46827	0.0193647	-0.165311	2.82112	1.27443	0.258938	-0.124866	-0.0195261	0.0247949	0.281313
1700066M21Rik	0.235332	4.39104	6.63895	0.00997726	0.0308925	4.39104	0.114089	0.735536	-0.0820776	-0.038535	0.0133901	0.748559
1700120E14Rik	0.680117	2.8586	8.34564	0.00386615	-0.582812	2.8586	6.14955	0.0131445	-0.198038	-0.0848288	0.00547351	0.0175914
1700121F15Rik	-0.101933	2.81225	0.570558	0.450037	0.211974	2.81225	2.46612	0.116325	0.0362576	0.0705197	0.471618	0.133779
1700123O20Rik	0.146306	4.97572	4.77092	0.0289444	0.0233271	4.97572	0.121408	0.727512	-0.0479735	-0.00759674	0.0363213	0.740739
1810019J16Rik	-0.00387653	3.29139	0.000843284	0.976833	-0.142085	3.29139	1.10726	0.292678	0.00109071	-0.0549296	0.977895	0.315349
1810024B03Rik	-2.0889	2.95417	145.783	1.44784e-33	0.0314876	2.95417	0.0378152	0.845815	0.612732	-0.000591494	0	0.85416
1810032O08Rik	-0.647754	3.17101	28.2922	1.04314e-07	-0.0166965	3.17101	0.0192939	0.889527	0.222679	-0.00749004	0	0.895302
1810037I17Rik	0.516694	5.86243	70.3515	4.96261e-17	0.0322811	5.86243	0.275109	0.599925	-0.177054	0.0390158	0	0.617656
1810058I24Rik	-0.632626	6.10427	116.865	3.07354e-27	0.00147142	6.10427	0.000657205	0.979548	0.214697	0.0136034	0	0.980553
1810059H22Rik	-1.38221	2.65156	67.0675	2.62364e-16	0.36838	2.65156	4.7602	0.0291251	0.423539	0.00837357	0	0.0368804
2010012P19Rik	-0.85728	2.58351	12.9938	0.000312517	-0.0927787	2.58351	0.139578	0.708701	0.266511	-0.00379235	0.000534792	0.722796
2010107G23Rik	-0.788926	3.41073	57.6846	3.07695e-14	-0.0285907	3.41073	0.0748505	0.784401	0.263532	-0.0367381	0	0.796236
2210015D19Rik	-0.466949	5.25238	31.8263	1.68595e-08	-0.123276	5.25238	2.22178	0.136076	0.154691	-0.012739	0	0.155487
2210016F16Rik	-0.221308	2.6272	1.87812	0.170548	0.096986	2.6272	0.360572	0.548188	0.0794807	0.0796365	0.189823	0.56758
2310030G06Rik	-0.0809139	3.84956	0.618189	0.431721	-0.04406	3.84956	0.18292	0.668876	0.0271618	-0.0270893	0.453548	0.684546
2310039H08Rik	-0.395812	6.60122	79.357	5.18412e-19	-0.0537213	6.60122	1.46248	0.226536	0.135136	-0.0193722	0	0.248844
2310047M10Rik	-0.132986	3.46892	1.39404	0.237724	0.146367	3.46892	1.69125	0.193436	0.0475794	0.0753261	0.259929	0.21587
2310061I04Rik	-0.0290148	4.26476	0.103524	0.747641	0.0988636	4.26476	1.20169	0.272984	0.0100737	0.0266147	0.758185	0.295541
2310067B10Rik	0.0674549	3.3803	0.17236	0.678023	-0.170273	3.3803	1.09514	0.295336	-0.0281118	0.0130261	0.691798	0.31808
2410002F23Rik	-1.41801	4.9324	341.959	2.38883e-76	-0.0803166	4.9324	1.09416	0.295551	0.450453	0.0132857	0	0.318298
2410004N09Rik	-0.0139966	4.71102	0.0240983	0.876635	0.056867	4.71102	0.400518	0.526822	0.0012277	0.0184858	0.881175	0.546991
2410017I17Rik	0.228537	4.88143	3.42443	0.0642383	0.0530052	4.88143	0.184593	0.667455	-0.0728087	-0.0493781	0.0766697	0.683124
2410127L17Rik	-0.562172	4.33539	28.2259	1.07949e-07	0.207303	4.33539	3.84384	0.0499291	0.189221	0.0494275	0	0.0605206
2410131K14Rik	-0.812787	4.19058	95.3986	1.55662e-22	-0.00243949	4.19058	0.000897673	0.976098	0.272441	-0.00522649	0	0.97717
2510009E07Rik	-0.902533	3.5157	75.0497	4.59011e-18	-0.14539	3.5157	1.93422	0.164298	0.299458	-0.0427552	0	0.185678
2510049J12Rik	-0.525349	3.01724	11.7812	0.000598322	0.0606242	3.01724	0.158381	0.690651	0.18227	0.0443016	0.000952092	0.705581
2610002J02Rik	-0.596063	3.44876	19.6556	9.27302e-06	-0.0166079	3.44876	0.0152228	0.901806	0.200706	0.0220042	1.62058e-05	0.906837
2610019F03Rik	-2.05562	4.94892	409.373	5.01948e-91	0.202921	4.94892	4.06382	0.0438114	0.607698	0.0509914	0	0.0536777
2610206C17Rik	-0.337895	4.83485	24.8079	6.33368e-07	0.0720132	4.83485	1.12673	0.288474	0.113675	0.00872505	4.05145e-06	0.311095
2610301B20Rik	-0.202556	3.70888	4.86115	0.0274681	0.0505397	3.70888	0.303362	0.581782	0.0687101	0.029777	0.0344981	0.600158
2610507B11Rik	-0.10124	7.07029	5.49242	0.0190991	-0.0307813	7.07029	0.507738	0.47612	0.0337647	0.000336382	0.0244708	0.497502
2610528J11Rik	0.277197	2.60794	1.92473	0.165336	0.0899565	2.60794	0.198352	0.656054	-0.0989306	0.0734645	0.184297	0.672541
2700060E02Rik	0.0585737	7.70372	2.95709	0.0855019	-0.0261178	7.70372	0.587949	0.443213	-0.0214475	-0.00171018	0.100047	0.465581
2700062C07Rik	-8.30843	3.83238	1264.64	5.47071e-277	0.0444199	3.83238	0.00715705	0.93258	0.997107	0.00289311	0	0.935955
2700089E24Rik	-0.369796	8.2618	200.818	1.38465e-45	-0.0499226	8.2618	3.6625	0.0556501	0.126359	-0.00769547	0	0.0671204
2700097O09Rik	0.501766	3.17812	11.2265	0.000806397	0.20057	3.17812	1.77477	0.182793	-0.187593	-0.0538203	0.00129241	0.205198
2810007J24Rik	-4.70025	6.1288	1434.02	0	-0.0703785	6.1288	0.330858	0.565155	0.921973	-0.00812799	0	0.584446
2810025M15Rik	-2.02209	4.37875	206.743	7.05381e-47	0.251435	4.37875	3.2905	0.0696818	0.586383	-0.0156446	0	0.0827915
2810403A07Rik	-0.335317	4.51796	17.0749	3.59336e-05	0.0132587	4.51796	0.0270137	0.869449	0.111154	-0.0210074	8.9132e-05	0.87622
2810459M11Rik	0.23533	2.85266	2.72583	0.0987371	-0.304013	2.85266	4.5395	0.0331214	-0.0855958	-0.0549484	0.114413	0.0413491
2900097C17Rik	0.515299	4.78762	70.8024	3.94848e-17	0.0504432	4.78762	0.678351	0.410155	-0.178656	0.0255724	0	0.43276
3010026O09Rik	0.29684	3.4663	2.91529	0.0877435	-0.0120332	3.4663	0.0047081	0.945296	-0.104004	-0.109808	0.102344	0.94834
3110001D03Rik	-0.0806716	4.60058	1.46206	0.226603	0.00924895	4.60058	0.0192281	0.889715	0.0264976	0.0185687	0.248334	0.895477
3110002H16Rik	0.556813	5.41493	35.42	2.65738e-09	-0.0555747	5.41493	0.353442	0.552171	-0.185475	0.0299865	0	0.571482
3110040N11Rik	-0.412438	4.76209	21.8037	3.02017e-06	0.104553	4.76209	1.40335	0.236163	0.139016	0.0317807	4.05145e-06	0.258296
3110043O21Rik	0.521961	5.92167	76.8145	1.87793e-18	-0.088521	5.92167	2.21227	0.136917	-0.178273	-0.0477529	0	0.156427
3110056K07Rik	-0.203914	6.26879	16.2558	5.53402e-05	-0.0661301	6.26879	1.71001	0.190985	0.0682259	0.00455223	0.000121544	0.21352
3110082I17Rik	1.00572	5.04681	119.652	7.5383e-28	-0.0106427	5.04681	0.0133266	0.908096	-0.318175	-0.0360618	0	0.912545
4632415L05Rik	0.78319	2.73305	26.3465	2.85342e-07	0.00312384	2.73305	9.62124e-05	0.992174	-0.26704	-0.0130993	4.05145e-06	0.992724
4632427E13Rik	-0.0512145	4.20771	0.241627	0.623034	-0.14985	4.20771	2.06485	0.15073	0.0182971	0.01925	0.63889	0.171186
4632428N05Rik	-0.20315	4.03187	4.76587	0.0290293	-0.0366944	4.03187	0.155644	0.693199	0.0632649	-0.0147554	0.0364347	0.707931
4732447D17Rik	-0.553301	3.06038	11.5295	0.000685014	0.122953	3.06038	0.563997	0.452654	0.181859	0.05389	0.00109389	0.474753
4833420G17Rik	-1.50252	6.64109	1027.73	1.68939e-225	-0.00514834	6.64109	0.0121219	0.912331	0.475945	0.006832	0	0.916455
4833422C13Rik	-0.0193238	4.45622	0.0754904	0.783504	-0.157085	4.45622	4.98834	0.0255187	0.00676475	-0.00800319	0.792209	0.0325534
4922501C03Rik	-0.636295	4.00018	44.3828	2.70048e-11	0.00347875	4.00018	0.00125278	0.971765	0.214642	0.0564427	0	0.973115
4930423O20Rik	0.199239	4.90145	10.0035	0.00156241	-0.0208338	4.90145	0.10957	0.740634	-0.0693556	-0.030763	0.00239441	0.753303
4930430F08Rik	-0.176598	3.15579	1.71931	0.189782	-0.0823793	3.15579	0.372774	0.541496	0.0581509	0.0479421	0.210096	0.561143
4930442L01Rik	0.0297904	3.14371	0.0449953	0.832013	-0.0319127	3.14371	0.0514303	0.820593	-0.00655675	0.028047	0.838323	0.830475
4930447A16Rik	-0.424795	4.21663	8.44319	0.00366412	-0.293368	4.21663	4.03278	0.0446244	0.136212	-0.0504779	0.00519801	0.054723
4930506C21Rik	0.379043	8.16807	126.351	2.57698e-29	0.0440748	8.16807	1.71098	0.190858	-0.130284	0.00911635	0	0.213398
4930506M07Rik	0.22445	5.10015	7.57156	0.00592966	0.0205467	5.10015	0.063302	0.801351	-0.0788397	0.0177542	0.00804619	0.811992
4930523C07Rik	-0.644657	4.03643	19.9042	8.14218e-06	-0.202377	4.03643	1.97414	0.160009	0.204854	-0.0817813	8.10291e-06	0.181035
4930558J22Rik	0.0191094	4.94137	0.068145	0.794057	0.0215078	4.94137	0.086271	0.768972	-0.00682586	0.0312909	0.802496	0.781392
4930581F22Rik	-0.105812	6.72417	6.8254	0.00898706	-0.0677277	6.72417	2.79635	0.0944795	0.0357502	-0.022016	0.0120085	0.109944
4931406P16Rik	-0.0803446	6.54869	3.44486	0.063449	-0.0465829	6.54869	1.15786	0.281909	0.0275895	-0.00589433	0.0759161	0.304706
4931414P19Rik	0.428641	2.84486	7.76515	0.00532638	-0.212565	2.84486	1.89493	0.168647	-0.151761	-0.0309117	0.00731692	0.190277
4931422A03Rik	-0.0183545	4.77364	0.0567683	0.811679	0.0247586	4.77364	0.103091	0.748151	0.00362651	-0.00816733	0.819581	0.760887
4932438A13Rik	-0.202935	6.70889	20.7545	5.22084e-06	-0.00588428	6.70889	0.0174311	0.894963	0.0696567	-0.00392501	4.05145e-06	0.900452
4932442E05Rik	0.281602	4.37469	16.8463	4.05331e-05	-0.023583	4.37469	0.117677	0.731568	-0.0989905	-0.00666335	8.9132e-05	0.744762
4932702P03Rik	-0.382364	5.40098	38.9136	4.42978e-10	-0.0920378	5.40098	2.25494	0.133188	0.130043	0.0125422	0	0.15214
4933415D12Rik	0.154792	3.24376	1.41499	0.23423	-0.160212	3.24376	1.51366	0.218581	-0.0565514	-0.0366913	0.256182	0.24077
4933427D14Rik	0.199886	3.16454	1.98245	0.159133	-0.0604609	3.16454	0.180847	0.670646	-0.063042	-0.0705054	0.178219	0.686162
5031439G07Rik	0.104726	7.26645	8.55267	0.00345016	0.0624846	7.26645	3.04483	0.0809944	-0.0362371	0.0115253	0.00492252	0.0953955
5033411D12Rik	0.224693	6.09364	13.214	0.000277859	0.0023762	6.09364	0.00144169	0.969712	-0.0788301	0.020774	0.000490226	0.971129
5330430P22Rik	0.0586245	3.46721	0.306294	0.579963	0.0246022	3.46721	0.0538219	0.816541	-0.0145011	0.045355	0.597338	0.82644
5430405H02Rik	-1.47829	3.86405	201.363	1.05283e-45	-0.164363	3.86405	2.45921	0.116837	0.466834	-0.0414091	0	0.134281
5430417L22Rik	-0.156641	3.07202	1.38148	0.239849	0.000850694	3.07202	3.97453e-05	0.99497	0.0450983	-0.0262802	0.262076	0.995272
5730455P16Rik	-0.259964	2.78299	4.32681	0.0375165	-0.158161	2.78299	1.60164	0.20567	0.0932229	-0.0228747	0.0464621	0.227955
5730508B09Rik	-0.704218	2.64365	22.9099	1.69777e-06	-0.0990946	2.64365	0.44851	0.503044	0.230669	-0.0560836	4.05145e-06	0.523849
5830417I10Rik	-2.37446	4.12868	356.234	1.86055e-79	-0.00955235	4.12868	0.00552735	0.940735	0.6688	0.0263465	0	0.943981
5830473C10Rik	-0.18497	6.48457	18.6371	1.58109e-05	-0.148912	6.48457	12.0794	0.000509832	0.0638315	-0.0515223	4.4566e-05	0.000737365
6330408A02Rik	-0.114676	2.56546	0.629341	0.427597	-0.216831	2.56546	2.25738	0.132979	0.0487758	0.0872753	0.449359	0.151893
6330416G13Rik	0.219099	4.70942	5.90543	0.0150943	0.0319776	4.70942	0.126079	0.722533	-0.0732987	0.0267566	0.0197751	0.736036
6430550D23Rik	-0.0634911	3.92975	0.310175	0.577573	-0.122132	3.92975	1.14542	0.284509	0.0254105	-0.0297289	0.595001	0.307351
6820431F20Rik	0.439553	2.6916	5.76863	0.0163147	0.0349166	2.6916	0.0350794	0.851429	-0.155981	-0.0694579	0.0212823	0.859435
8430408G22Rik	-0.31097	7.47718	56.5221	5.55708e-14	-0.0332747	7.47718	0.647666	0.420948	0.107655	-0.00515096	0	0.443387
8430419L09Rik	0.512518	7.23038	200.827	1.37843e-45	0.0237437	7.23038	0.431841	0.511087	-0.174677	0.0181196	0	0.531449
9030025P20Rik	-2.33779	2.96668	158.662	2.21785e-36	0.295736	2.96668	2.59393	0.107274	0.65816	0.0547776	0	0.124027
9030617O03Rik	-0.161361	7.19942	15.2133	9.60262e-05	0.0282446	7.19942	0.466208	0.494737	0.0554641	0.00654324	0.000174212	0.515876
9030622O22Rik	-1.22081	4.36088	26.1004	3.24118e-07	-0.0422353	4.36088	0.0313725	0.859412	0.345027	0.109406	4.05145e-06	0.866885
9130401M01Rik	-0.604907	4.57497	30.3854	3.54183e-08	-0.101412	4.57497	0.856352	0.354762	0.197664	-0.0113519	0	0.377595
9230112E08Rik	0.386881	3.36012	12.6208	0.00038147	-0.0494782	3.36012	0.205418	0.650383	-0.135246	-0.0112068	0.000652284	0.666808
9330160F10Rik	-0.340474	3.0669	7.36138	0.00666397	0.143382	3.0669	1.30608	0.253105	0.117943	0.0963407	0.0090631	0.275312
9330162012Rik	0.764853	6.06929	165.604	6.75005e-38	-0.0817813	6.06929	1.89995	0.168084	-0.259086	-0.00725905	0	0.18964
9430008C03Rik	-0.358726	4.58431	21.1386	4.27243e-06	0.04605	4.58431	0.348727	0.554834	0.127706	0.00710824	4.05145e-06	0.574245
9430015G10Rik	0.0523618	4.96498	0.561542	0.45364	-0.143473	4.96498	4.21712	0.040018	-0.0192485	-0.0342978	0.475106	0.0492414
9430016H08Rik	-0.130975	2.69505	0.721629	0.39561	0.123549	2.69505	0.644746	0.421997	0.0393959	0.00114322	0.418345	0.444517
9430038I01Rik	0.359951	3.52203	7.94223	0.00482943	-0.0277291	3.52203	0.0468896	0.828567	-0.12327	0.0240123	0.00668085	0.837857
9630033F20Rik	0.514628	4.81735	44.3722	2.7152e-11	-0.0603105	4.81735	0.610664	0.434538	-0.178168	-0.0482034	0	0.457186
9830147E19Rik	0.189019	3.16183	1.64403	0.199773	-0.0718611	3.16183	0.238087	0.625591	-0.0627475	0.00758171	0.220691	0.642512
A130010J15Rik	-0.817292	3.52935	21.0745	4.41763e-06	-0.231448	3.52935	1.69978	0.192317	0.256885	0.0463367	4.05145e-06	0.214682
A1bg	3.94962	9.75103	629.003	8.23461e-139	0.147457	9.75103	1.13176	0.2874	-0.842004	0.0134511	0	0.310086
A230083G16Rik	-0.0363673	2.66013	0.0724999	0.787731	0.111772	2.66013	0.679089	0.409901	0.00762234	-0.00489952	0.796159	0.432456
A2m	6.65244	5.1466	152.245	5.602e-35	-0.384018	5.1466	0.681679	0.409009	-0.95434	-0.0201444	0	0.431553
A430005L14Rik	0.145139	4.39575	4.68367	0.0304506	-0.047791	4.39575	0.50745	0.476245	-0.0480405	-0.0313265	0.0381161	0.49762
A430105I19Rik	-0.839037	3.64564	49.4888	1.99504e-12	-0.0731863	3.64564	0.381011	0.537063	0.27451	-0.00926714	0	0.556848
A530032D15Rik	0.102125	3.22647	0.263437	0.607769	-0.15093	3.22647	0.584593	0.444518	-0.0305963	-0.175229	0.624155	0.466845
A530054K11Rik	-1.01245	4.03511	77.2696	1.49142e-18	0.0406852	4.03511	0.125116	0.723551	0.328829	0.0108472	0	0.736984
A530084C06Rik	-0.177022	3.75683	2.19126	0.138796	0.190712	3.75683	2.54762	0.110461	0.0602985	0.0688081	0.156726	0.127361
A630007B06Rik	0.0602694	5.56636	1.09563	0.295227	0.0904409	5.56636	2.46697	0.116262	-0.021183	0.0358881	0.318618	0.133726
A630076J17Rik	1.83397	5.12785	171.185	4.07754e-39	-0.0424964	5.12785	0.0959819	0.756706	-0.541388	0.0104798	0	0.769391
A730061H03Rik	0.408204	3.6184	14.4727	0.000142204	0.0578426	3.6184	0.291533	0.58924	-0.140859	-0.0065046	0.000239036	0.60739
A830010M20Rik	0.0833647	2.56505	0.261484	0.609102	-0.0227556	2.56505	0.0194733	0.889018	-0.0290392	0.0339195	0.625322	0.89484
A830073O21Rik	0.926489	2.6579	32.1514	1.42615e-08	0.0146789	2.6579	0.00783325	0.929475	-0.298185	0.0125513	0	0.932815
A930015D03Rik	-1.09453	4.07324	108.837	1.7618e-25	-0.0749702	4.07324	0.510282	0.475017	0.353986	-0.0371623	0	0.496457
A930028C08Rik	-0.0203587	4.53	0.0660751	0.79714	0.0206438	4.53	0.0678545	0.794487	0.00724841	-0.0201999	0.805559	0.80549
A930033H14Rik	-0.326511	4.93765	20.2998	6.62062e-06	0.0966528	4.93765	1.77873	0.182306	0.112734	0.0381272	8.10291e-06	0.204708
AA987161	-0.287353	2.58557	4.21311	0.0401127	0.0207011	2.58557	0.0219854	0.882126	0.0981873	0.0398901	0.0494196	0.888285
Aacs	-0.40046	6.78519	85.3085	2.55258e-20	0.0370944	6.78519	0.732906	0.391943	0.136083	-0.00751346	0	0.414423
Aadat	-0.0554068	7.16012	1.68837	0.193816	-0.0196774	7.16012	0.212986	0.644437	0.0173146	-0.0123881	0.214427	0.660727
Aaed1	-0.0791724	5.46045	1.21111	0.271113	0.0617491	5.46045	0.737224	0.390552	0.0234221	-0.00913493	0.293848	0.413228
Aagab	-0.0463138	3.96109	0.258389	0.611229	-0.0908978	3.96109	0.996015	0.318277	0.0177328	-0.0347232	0.62738	0.341262
Aak1	0.0306488	4.61828	0.0681337	0.794074	-0.244114	4.61828	4.3154	0.0377689	-0.0125794	-0.0402101	0.802532	0.0465796
Aamp	-0.407527	6.08379	69.6368	7.12943e-17	0.0247374	6.08379	0.256647	0.612433	0.138927	0.012851	0	0.629766
Aar2	0.0324271	5.73002	0.373256	0.541235	0.0168406	5.73002	0.100705	0.750985	-0.0121444	-0.0112379	0.560377	0.763594
Aars2	0.0571722	4.41104	0.451708	0.501525	0.0278736	4.41104	0.10722	0.743331	-0.0210102	0.0162887	0.522281	0.75592
Aarsd1	-0.265985	4.95217	17.6611	2.63969e-05	-0.00900838	4.95217	0.0202633	0.886804	0.0945298	-0.0105701	7.29262e-05	0.892742
Aasdh	-0.142031	4.03262	2.63209	0.104724	-0.0742421	4.03262	0.718575	0.396612	0.0469589	-0.0112247	0.120814	0.419005
Aass	-0.0102483	10.2624	0.0957072	0.757043	-0.00834037	10.2624	0.0633956	0.801207	0.00293772	0.000172691	0.766932	0.811826
Aatf	-0.337423	5.29043	20.3884	6.32132e-06	0.0667352	5.29043	0.797724	0.371775	0.116505	-0.00181775	8.10291e-06	0.394292
Abca3	-0.419508	7.92644	132.7	1.05171e-30	-0.0394272	7.92644	1.1743	0.278519	0.143626	0.00194746	0	0.30129
Abca5	0.893919	5.05535	123.529	1.06801e-28	-0.0144353	5.05535	0.0325523	0.856821	-0.297076	-0.0235595	0	0.864406
Abca6	-0.00794131	10.6025	0.103757	0.747367	-0.0111274	10.6025	0.203715	0.651738	0.00234352	-0.00748072	0.757946	0.668243
Abcb10	-0.0583721	4.6733	0.488683	0.484515	-8.51763e-05	4.6733	1.0575e-06	0.999179	0.0159111	-0.0433929	0.505828	0.999174
Abcb11	1.36221	9.3805	1538.2	0	0.0425231	9.3805	1.54105	0.214461	-0.439322	0.0047847	0	0.23684
Abcb1a	-1.32795	5.72737	133.39	7.42714e-31	0.115085	5.72737	1.02511	0.31131	0.402768	-0.0334402	0	0.334354
Abcb1b	1.46964	4.22784	41.5726	1.13574e-10	0.239859	4.22784	1.11653	0.290666	-0.421939	0.0521345	0	0.313271
Abcb4	-0.134181	10.6378	22.37	2.24854e-06	-0.0295471	10.6378	1.08505	0.297571	0.0456786	-0.00433264	4.05145e-06	0.320361
Abcb6	0.0121605	7.2122	0.112324	0.737513	-0.0441276	7.2122	1.47914	0.22391	-0.00427716	-0.018317	0.748316	0.246203
Abcb8	0.093558	6.28188	6.0244	0.0141094	-0.0577629	6.28188	2.29622	0.129689	-0.0334908	-0.0108072	0.0185638	0.148295
Abcc3	-0.78327	10.3959	606.443	6.64367e-134	0.0363218	10.3959	1.3177	0.251005	0.264869	-0.00260368	0	0.273194
Abcc9	0.183404	8.16554	26.0396	3.34492e-07	0.0123852	8.16554	0.118802	0.730337	-0.0634895	-0.00431961	4.05145e-06	0.743567
Abcd2	-0.708844	6.63104	50.713	1.06907e-12	-0.0503902	6.63104	0.258772	0.610965	0.248647	0.0126146	0	0.628287
Abcd3	-0.170618	11.2649	47.6499	5.09543e-12	-0.00341459	11.2649	0.0190941	0.890097	0.0582475	0.00901085	0	0.895886
Abcf1	0.48484	5.36659	49.2194	2.2887e-12	0.00890848	5.36659	0.0167003	0.897176	-0.165826	0.0277406	0	0.902433
Abcf2	-0.0378494	5.86954	0.288722	0.59104	-0.0269497	5.86954	0.146303	0.702094	0.0118258	0.0242073	0.607876	0.716317
Abcg1	-0.0298309	5.35112	0.164511	0.685037	-0.244025	5.35112	11.0393	0.000891997	0.00380699	-0.0203612	0.698544	0.00130457
Abhd10	1.29521	3.3814	127.306	1.5921e-29	-0.0558523	3.3814	0.235236	0.627668	-0.413016	-0.0254363	0	0.64457
Abhd15	-0.189998	5.42649	9.87372	0.00167656	0.0144634	5.42649	0.0572357	0.81092	0.0615991	0.0143366	0.0025119	0.821262
Abhd16a	0.299424	7.57599	19.847	8.38947e-06	-0.0469432	7.57599	0.488634	0.484537	-0.103026	0.0264827	8.10291e-06	0.505751
Abhd17b	0.655559	5.28484	62.0771	3.30267e-15	0.0146658	5.28484	0.0310172	0.860202	-0.216068	-0.0548529	0	0.867615
Abhd17c	0.155455	6.63079	9.11448	0.00253595	-0.0835026	6.63079	2.6304	0.104835	-0.0554957	0.0315314	0.00368277	0.121422
Abhd2	0.200501	8.52545	41.9704	9.26673e-11	0.00425925	8.52545	0.01897	0.890453	-0.0692654	-0.0136009	0	0.896238
Abhd6	8.16589	4.96688	2291.06	0	0.137605	4.96688	0.198695	0.655776	-0.994248	0.00297798	0	0.672286
Abi2	0.274998	2.44857	2.42343	0.119533	-0.116587	2.44857	0.434369	0.509853	-0.108912	0.00259483	0.136765	0.530234
Abi3	0.142961	2.76373	0.668	0.41375	0.301654	2.76373	2.95612	0.085553	-0.0408221	0.20848	0.435855	0.100403
Abi3bp	0.822502	6.13744	127.641	1.3452e-29	0.0872319	6.13744	1.44627	0.229127	-0.274512	0.0269391	0	0.251344
Ablim1	-0.00238884	7.63328	0.00321139	0.954809	-0.0360813	7.63328	0.733713	0.391682	-0.000423752	-0.0238716	0.957488	0.414204
Ablim3	0.314157	6.56853	10.2789	0.0013456	-0.0309667	6.56853	0.100059	0.751758	-0.107042	0.0451337	0.00209055	0.76438
Abr	-0.0865543	3.54315	0.592053	0.441626	-0.0129878	3.54315	0.0133373	0.908059	0.0215186	0.0613288	0.463401	0.912521
Abracl	-0.203137	4.68749	5.99868	0.0143166	0.101109	4.68749	1.48813	0.222507	0.0667829	-0.0316156	0.0188271	0.244821
Abt1	0.293604	4.59456	18.5348	1.66828e-05	0.0721667	4.59456	1.11875	0.290187	-0.103936	-0.0119559	4.86174e-05	0.31276
Abtb1	0.110089	4.34444	1.14347	0.28492	0.149915	4.34444	2.12331	0.145073	-0.033216	0.0494638	0.308413	0.165149
Abtb2	0.410417	3.69205	11.7985	0.000592791	-0.135798	3.69205	1.2882	0.25638	-0.14723	0.0220957	0.00094804	0.27861
AC020971.1	0.481198	2.24903	7.89617	0.00495397	0.0236741	2.24903	0.0225532	0.880625	-0.163766	0.0314704	0.00686721	0.886871
AC025622.1	0.82654	2.8096	40.167	2.33158e-10	0.138853	2.8096	1.11843	0.290256	-0.285938	-0.00849127	0	0.312878
AC079245.1	0.242728	3.62734	6.29426	0.012113	0.0956459	3.62734	0.976299	0.323114	-0.0819305	-0.0434858	0.0161369	0.346014
AC098726.1	-0.0244219	4.47098	0.0797975	0.777572	0.047969	4.47098	0.308612	0.578533	0.00730424	-0.0247852	0.786468	0.597103
AC099934.1	0.511232	2.92406	4.73242	0.0295992	-0.0786035	2.92406	0.112384	0.737446	-0.164955	-0.0774185	0.0371194	0.750358
AC108401.1	0.13255	5.20734	4.82343	0.0280753	-0.0486286	5.20734	0.648831	0.420531	-0.0453046	-0.00395985	0.0352274	0.442978
AC117213.1	0.12367	4.03295	2.46858	0.116143	0.0184639	4.03295	0.0549631	0.814642	-0.0457297	-0.0343144	0.133054	0.824657
AC120136.1	0.203513	3.65802	4.72152	0.0297875	0.0813393	3.65802	0.752581	0.38566	-0.0716703	0.0441483	0.037326	0.408139
AC120176.1	0.166217	4.16696	4.3426	0.0371702	0.13742	4.16696	2.96905	0.0848716	-0.0541721	0.0371216	0.0459799	0.0996374
AC121292.1	8.09076	5.68612	500.275	8.28222e-111	0.473243	5.68612	1.97331	0.160097	-0.991425	0.00411736	0	0.181157
AC122247.1	-1.00192	2.85116	22.6651	1.92842e-06	0.157819	2.85116	0.554585	0.45645	0.32649	0.0972412	4.05145e-06	0.478286
AC122371.1	0.131568	4.37889	1.99608	0.157707	-0.0179054	4.37889	0.0370395	0.847385	-0.0485385	-0.0156456	0.176684	0.855647
AC122821.1	-0.513767	2.42956	7.10712	0.00767784	-0.128367	2.42956	0.457635	0.498732	0.159349	0.0888265	0.0104284	0.519761
AC125374.1	-0.162711	2.80952	1.04429	0.306827	-0.186155	2.80952	1.37071	0.241689	0.0446233	-0.121319	0.33004	0.263802
AC130210.1	-3.44411	2.63548	102.241	4.91659e-24	0.478122	2.63548	2.51155	0.113015	0.766943	0.0164124	0	0.129999
AC130214.1	0.420667	3.73667	13.5389	0.000233665	-0.112271	3.73667	0.963363	0.326341	-0.142552	0.0223927	0.000413248	0.349393
AC131759.1	-0.0173772	4.40167	0.0327529	0.856385	-0.011206	4.40167	0.0136422	0.907019	0.00549398	-0.0251254	0.861785	0.911634
AC131780.1	1.10017	4.15065	38.7046	4.93055e-10	-0.0978008	4.15065	0.308276	0.57874	-0.356032	0.0268139	0	0.597265
AC132347.1	0.764758	4.23635	70.3962	4.85133e-17	-0.115026	4.23635	1.59237	0.206988	-0.255778	-0.0125279	0	0.229219
AC133183.2	0.0718529	6.01945	1.65113	0.198805	0.0291941	6.01945	0.272941	0.601366	-0.0252487	0.00831572	0.219625	0.619131
AC133646.1	0.00184209	2.86165	0.000236195	0.987738	-0.035111	2.86165	0.0877671	0.767035	0.00217349	0.025696	0.98834	0.779487
AC136008.1	-0.623907	2.99852	15.9708	6.43278e-05	0.244867	2.99852	2.45335	0.117275	0.210531	0.123442	0.000129647	0.134759
AC136215.1	0.924636	4.80689	127.076	1.78822e-29	0.0506845	4.80689	0.38338	0.5358	-0.30282	0.0336135	0	0.555596
AC138214.1	0.944955	2.79031	52.0655	5.36805e-13	0.0478449	2.79031	0.132447	0.715909	-0.309515	0.00965091	0	0.729679
AC140312.1	-1.42114	2.84024	74.0416	7.64873e-18	-0.00916477	2.84024	0.00325381	0.954512	0.446376	-0.0532464	0	0.956941
AC140333.2	-0.0864371	2.81844	0.277678	0.598227	-0.168022	2.81844	1.04538	0.306573	0.0372934	0.0896205	0.614695	0.329788
AC140392.1	-0.0705353	4.87147	1.07691	0.299391	0.0429144	4.87147	0.398307	0.527965	0.0227907	0.00689435	0.322779	0.548133
AC141882.1	0.267027	2.43915	2.52433	0.112103	-0.353535	2.43915	4.44559	0.0349915	-0.106736	-0.0981938	0.12884	0.0434518
AC144852.1	-0.103034	3.36169	0.749081	0.386767	-0.0153998	3.36169	0.0166385	0.897365	0.0383357	-0.007301	0.409367	0.902627
AC147987.1	-0.820609	4.36685	63.6659	1.47414e-15	-0.104144	4.36685	1.02723	0.310811	0.272119	-0.019616	0	0.333917
AC149055.1	0.243939	7.83794	66.5032	3.49328e-16	-0.0246119	7.83794	0.677097	0.410588	-0.0845512	-0.00423074	0	0.433194
AC153506.1	-1.08028	2.9615	78.7378	7.09265e-19	0.177036	2.9615	2.08857	0.148405	0.36579	0.00590845	0	0.168779
AC153860.1	-0.0122708	3.48682	0.0111372	0.915953	0.156684	3.48682	1.87383	0.171037	0.000824574	0.0337604	0.91934	0.19293
AC154200.1	0.646285	3.29146	24.23	8.54901e-07	0.161864	3.29146	1.51563	0.218282	-0.201231	-0.0133629	4.05145e-06	0.240519
AC154625.1	-0.199204	3.03498	2.76967	0.0960661	-0.0237462	3.03498	0.0393342	0.842788	0.0715783	-0.0822764	0.111419	0.851348
AC154766.1	0.284118	2.87788	4.96599	0.0258505	0.0721973	2.87788	0.317995	0.572815	-0.107934	-0.0265775	0.0325332	0.591735
AC155921.1	-0.0998161	2.8976	0.550383	0.458161	-0.179661	2.8976	1.77786	0.182412	0.0338064	-0.0712305	0.479558	0.204817
AC158595.1	2.38749	2.99073	117.058	2.78822e-27	-0.304426	2.99073	1.90868	0.16711	-0.667798	-0.00882727	0	0.188721
AC158662.1	-0.155	3.40797	1.43778	0.230499	-0.203118	3.40797	2.47773	0.115469	0.0471762	-0.0925757	0.252511	0.132819
AC158993.1	0.449847	3.50735	7.94376	0.00482534	-0.122411	3.50735	0.590738	0.442134	-0.139888	-0.0257142	0.00668085	0.464503
AC159323.1	-0.124773	3.38864	1.43773	0.230507	-0.0591481	3.38864	0.322939	0.569847	0.0413812	0.0284917	0.252511	0.588964
AC161602.1	0.160924	6.38301	13.5135	0.000236853	-0.0280089	6.38301	0.409369	0.52229	-0.0560162	0.00430073	0.000421351	0.54251
AC163296.1	0.673919	3.73921	47.0004	7.09717e-12	0.0710636	3.73921	0.520065	0.470814	-0.226031	-0.00632164	0	0.492422
AC164597.1	1.04827	2.55368	32.9762	9.32924e-09	0.0626067	2.55368	0.126707	0.721871	-0.351768	-0.0145127	0	0.735343
AC165433.1	-0.310049	5.48271	43.9558	3.35879e-11	-0.0511969	5.48271	1.19725	0.273872	0.106867	-0.00571097	0	0.296392
AC167018.1	-0.110185	3.61884	0.287073	0.592102	-0.143017	3.61884	0.483289	0.486936	0.0331251	-0.138767	0.608865	0.508154
AC170752.1	0.882144	3.46303	39.0107	4.21485e-10	-0.0153232	3.46303	0.0121407	0.912263	-0.29563	-0.0621056	0	0.916402
Acaa1a	0.224053	9.49337	47.7538	4.83243e-12	0.00506231	9.49337	0.0243865	0.875906	-0.0779458	-0.00404626	0	0.882309
Acaa1b	0.864171	11.8979	548.743	2.36317e-121	0.0356839	11.8979	0.948845	0.330014	-0.289163	-0.010796	0	0.353117
Acaa2	-0.0136577	11.7665	0.342381	0.558458	-0.0134423	11.7665	0.331666	0.56468	0.00429119	-0.00539201	0.576773	0.583972
Acaca	-0.0993757	8.73689	10.1513	0.00144196	0.0357484	8.73689	1.31383	0.251702	0.0339056	0.00850154	0.0022364	0.273842
Acacb	-0.0364336	8.61788	1.02251	0.311924	-0.0189176	8.61788	0.275657	0.599562	0.0128802	0.00552344	0.335161	0.617255
Acad10	-1.30302	6.8945	595.491	1.60172e-131	-0.0386652	6.8945	0.530826	0.46626	0.419903	0.00536689	0	0.487929
Acad11	-0.276068	9.9156	80.232	3.32933e-19	0.0459878	9.9156	2.22915	0.135428	0.0951203	0.00719516	0	0.154814
Acad12	-1.70578	5.51138	326.834	4.70274e-73	-0.0714212	5.51138	0.580936	0.445946	0.522172	0.0248581	0	0.468133
Acad8	-0.145296	5.74895	6.17496	0.0129571	0.0176524	5.74895	0.0911341	0.76274	0.0504728	0.012328	0.0171498	0.775416
Acadl	0.0848395	7.65332	4.93757	0.026279	0.0222971	7.65332	0.341075	0.55921	-0.0284926	0.00982631	0.0330315	0.578531
Acads	-0.12559	8.48189	20.9312	4.7608e-06	-0.0125342	8.48189	0.208499	0.647946	0.0424662	0.0017587	4.05145e-06	0.664272
Acadvl	0.0540991	6.97227	1.63621	0.200846	-0.0038652	6.97227	0.0083494	0.927195	-0.0183156	0.0228389	0.221712	0.930643
Acap1	-0.757792	3.37615	26.7797	2.28023e-07	0.0172959	3.37615	0.0141635	0.905267	0.253388	0.0768573	4.05145e-06	0.910135
Acap2	0.142079	3.76071	1.36516	0.242644	0.116514	3.76071	0.920901	0.337239	-0.0445132	0.0183408	0.264981	0.360117
Acap3	-0.0175539	3.99466	0.0157422	0.900153	-0.162445	3.99466	1.37983	0.24013	-1.68756e-05	-0.0577051	0.904604	0.262218
Acat2	-0.610974	3.49859	19.75	8.82609e-06	-0.0170402	3.49859	0.0157621	0.90009	0.198594	-0.0160919	1.21544e-05	0.905273
Acat3	-0.0898558	5.30775	2.6185	0.105624	-0.0514759	5.30775	0.859315	0.35393	0.0302354	0.00113307	0.121843	0.376866
Acer2	-0.0409288	5.27084	0.463719	0.495891	0.0634879	5.27084	1.11631	0.290715	0.010429	0.0194749	0.516933	0.313335
Acin1	0.0754525	5.66176	1.73646	0.187589	0.0621529	5.66176	1.17866	0.277629	-0.0256049	-0.00126834	0.207876	0.300367
Acly	0.166353	8.63983	31.8055	1.70413e-08	0.0331404	8.63983	1.26276	0.261129	-0.0574437	0.0047333	0	0.283671
Acmsd	-0.0595826	4.38504	0.338488	0.560703	-0.0741851	4.38504	0.52495	0.468738	0.0195223	0.0143239	0.578916	0.490453
Acn9	-0.0308109	2.9572	0.0322146	0.857557	0.202005	2.9572	1.37595	0.240793	0.0127924	0.0392285	0.862838	0.262854
Acot1	0.893211	6.07407	220.57	6.79206e-50	0.0020515	6.07407	0.00117198	0.97269	-0.296772	0.00546364	0	0.973982
Acot11	-1.77085	5.56047	264.482	1.80991e-59	-0.0500326	5.56047	0.214389	0.643349	0.542548	-0.00999327	0	0.659727
Acot12	-0.116546	5.87753	4.68796	0.0303747	-0.0134347	5.87753	0.0623003	0.802896	0.0401693	0.0105336	0.0380431	0.81367
Acot13	-0.702747	6.56676	292.505	1.41508e-65	0.0206679	6.56676	0.253015	0.61496	0.238275	0.026454	0	0.632124
Acot2	0.211944	4.69873	9.37877	0.00219513	-0.0248285	4.69873	0.128951	0.719522	-0.0549036	-0.0152308	0.00323306	0.733009
Acot3	-0.0165912	7.55574	0.174785	0.675894	0.0265335	7.55574	0.447852	0.503357	0.0160421	0.0376121	0.689606	0.524161
Acot4	-0.180346	6.81787	11.1555	0.000837814	-0.0405885	6.81787	0.565475	0.452063	0.0664239	0.00248863	0.00134508	0.474129
Acox1	0.0663508	10.5411	7.07908	0.00779889	0.00935089	10.5411	0.140604	0.707681	-0.0233427	-0.00452282	0.0105702	0.7219
Acp1	-0.0975133	3.01593	0.439487	0.50737	-0.129588	3.01593	0.780372	0.377028	0.0206916	-0.105205	0.527892	0.399429
Acp2	0.0742385	5.10562	1.29239	0.255608	-0.0877382	5.10562	1.80582	0.17901	-0.0247212	-0.0156964	0.278031	0.201175
Acp6	0.517772	4.90291	36.3758	1.6271e-09	0.0747254	4.90291	0.758812	0.3837	-0.175181	0.0118224	0	0.406081
Acpl2	-0.925064	5.53055	245.861	2.07374e-55	-0.0353662	5.53055	0.357841	0.549708	0.310465	-0.0281626	0	0.569031
Acrbp	-0.128161	5.0726	4.69543	0.0302429	0.0574505	5.0726	0.943794	0.331304	0.043876	0.015191	0.037873	0.354373
Acsf2	1.54145	7.23527	1100.32	2.81746e-241	-0.03858	7.23527	0.701913	0.402142	-0.487861	-0.0147894	0	0.424835
Acsl1	-0.136424	11.1837	30.0879	4.12894e-08	0.00423679	11.1837	0.0290307	0.864708	0.0467928	0.000701907	0	0.871776
Acsl3	-0.816762	4.02011	48.2469	3.75794e-12	-0.159772	4.02011	1.84659	0.174181	0.271862	0.0238484	0	0.196171
Acss2	-0.129439	7.17547	5.54059	0.0185803	-0.00036051	7.17547	4.41339e-05	0.994699	0.0413758	0.00786931	0.0238266	0.995033
Acss3	-1.10314	6.77389	409.107	5.73585e-91	-0.0764158	6.77389	1.98383	0.158987	0.360167	-0.0206404	0	0.179872
Actl6a	-0.33134	5.38426	34.4652	4.33944e-09	0.0794676	5.38426	1.98254	0.159123	0.114705	7.76519e-05	0	0.180026
Actn1	0.239172	6.44969	24.4653	7.56612e-07	0.0572349	6.44969	1.40183	0.236417	-0.0820158	0.00689817	4.05145e-06	0.258588
Actr10	0.227909	5.16688	10.2516	0.00136565	0.104791	5.16688	2.16794	0.140915	-0.0782276	-0.0064903	0.00212701	0.160968
Actr2	-0.219121	7.36139	40.1021	2.41029e-10	0.00690993	7.36139	0.039886	0.841704	0.075299	-0.013414	0	0.850202
Actr3	0.144239	5.48562	5.57504	0.0182182	-0.0590704	5.48562	0.934988	0.33357	-0.0519293	-0.00120385	0.0234336	0.356427
Actr5	-0.615573	4.74337	94.0234	3.11814e-22	0.0156954	4.74337	0.0612805	0.804483	0.212524	0.0141979	0	0.815075
Acvr2b	0.549003	2.90632	10.0988	0.00148367	-0.0261389	2.90632	0.0237599	0.877497	-0.178745	-0.0202541	0.00230933	0.883962
Acvrl1	-0.133061	4.04087	2.28223	0.130864	0.0999168	4.04087	1.28664	0.256667	0.051714	-0.00733147	0.148729	0.27889
Adal	0.462423	6.16026	57.207	3.92268e-14	-0.0475081	6.16026	0.605266	0.436576	-0.15923	0.0086736	0	0.459143
Adam17	-8.79078	3.33037	966.257	3.88031e-212	0.04355	3.33037	1.04918e-10	0.999992	1	0	0	0.999733
Adam19	0.390658	2.55998	6.90916	0.00857551	-0.129345	2.55998	0.760359	0.383216	-0.136126	-0.0265399	0.011498	0.405538
Adam23	0.439226	4.93938	26.9661	2.07052e-07	0.141302	4.93938	2.79429	0.0946005	-0.148124	0.0379783	4.05145e-06	0.110066
Adamts10	0.0747449	3.04218	0.176566	0.674341	0.0794905	3.04218	0.199999	0.654722	-0.0259728	0.0557735	0.688131	0.671306
Adamts13	2.04013	7.00655	827.815	4.839e-182	0.0628744	7.00655	0.826719	0.363223	-0.602498	0.00583447	0	0.385864
Adamts2	0.296153	3.21774	4.48081	0.0342776	0.328163	3.21774	5.49712	0.0190478	-0.103327	0.0066563	0.0424633	0.0249529
Adamts7	0.8453	2.61853	21.0503	4.47373e-06	0.0233188	2.61853	0.0174863	0.894798	-0.272649	0.0192954	4.05145e-06	0.900322
Adamts9	0.0860904	4.26662	1.09552	0.295251	-0.0766824	4.26662	0.869525	0.351087	-0.0311481	0.000394011	0.318643	0.374111
Adamtsl2	0.311583	4.15632	7.48674	0.00621551	0.0435551	4.15632	0.147279	0.701149	-0.10087	0.0885593	0.00843918	0.715479
Adap2	-1.05189	2.56617	29.963	4.40359e-08	-0.132966	2.56617	0.47154	0.49228	0.326273	-0.0854886	0	0.51342
Adat1	0.00855739	2.82469	0.0035886	0.952231	0.127897	2.82469	0.832135	0.361656	0.00158583	0.00722065	0.954919	0.384301
Adc	-1.26584	2.5031	40.1698	2.32821e-10	0.324555	2.5031	2.73911	0.0979195	0.385386	0.0267366	0	0.113712
Adck1	-0.102784	4.96414	1.96547	0.16093	0.149354	4.96414	4.15033	0.0416264	0.0369872	0.0363118	0.179925	0.0512144
Adck5	0.270307	3.56772	3.04598	0.0809373	-0.0778866	3.56772	0.25197	0.615692	-0.101269	-0.0013418	0.0951079	0.632886
Adcy3	-1.32774	2.87259	55.791	8.05991e-14	0.179375	2.87259	1.00191	0.316849	0.426293	-0.03014	0	0.339998
Adcy5	0.163309	2.67805	1.58503	0.208037	0.121953	2.67805	0.884675	0.346925	-0.0529007	0.0376539	0.229053	0.369752
Adcy7	-0.513849	3.77077	16.943	3.85196e-05	-0.0411905	3.77077	0.109231	0.741021	0.172573	0.0289176	8.9132e-05	0.753668
Adcy9	0.11674	5.70375	4.24694	0.0393211	-0.0611971	5.70375	1.16727	0.279963	-0.0414385	0.017424	0.0483946	0.302688
Add1	0.0047329	5.50138	0.00530965	0.941912	0.0167086	5.50138	0.0665141	0.796482	-0.00112121	-0.00508202	0.945018	0.807487
Adh1	0.512085	11.2523	123.32	1.18663e-28	-0.0471095	11.2523	1.04892	0.305756	-0.174307	-0.0294265	0	0.329059
Adh4	0.457282	8.61678	262.973	3.85871e-59	0.000362301	8.61678	0.000159637	0.989919	-0.156674	0.00355884	0	0.990406
Adh5	5.17405	10.7144	7248.69	0	-0.0941785	10.7144	3.21641	0.0729031	-0.9454	-0.002526	0	0.0864216
Adh7	1.51167	3.11937	103.803	2.23464e-24	0.18558	3.11937	1.53884	0.214791	-0.474933	0.052501	0	0.23714
Adhfe1	-0.776515	3.7308	72.3729	1.78143e-17	-0.214952	3.7308	5.4982	0.0190361	0.25575	-0.00412172	0	0.0249489
Adipor1	0.135269	2.64462	1.12458	0.288934	-0.0880205	2.64462	0.47572	0.490367	-0.0509218	0.00984524	0.312424	0.511427
Adipor2	-0.500469	8.97376	281.871	2.93613e-63	0.0220656	8.97376	0.549873	0.45837	0.171481	0.00653411	0	0.480081
Adk	0.180806	10.513	11.6925	0.000627535	-0.013283	10.513	0.0631515	0.801583	-0.0626484	0.00312426	0.00100881	0.81226
Adora1	-0.512168	3.79739	19.4071	1.05616e-05	-0.108652	3.79739	0.87155	0.350527	0.162101	-0.0305248	1.62058e-05	0.373536
Adrbk2	-0.113497	3.71224	0.880537	0.348055	0.091127	3.71224	0.566644	0.451595	0.0380641	0.0408933	0.371518	0.473684
Adss	0.0747502	5.59378	1.85117	0.173647	0.0294554	5.59378	0.287382	0.591903	-0.0261368	0.00267054	0.193185	0.609958
Aebp2	-1.0523	5.62584	270.238	1.0072e-60	0.0807094	5.62584	1.5949	0.206627	0.347736	0.00305162	0	0.228895
Aen	-0.151712	2.89071	1.7771	0.182506	0.224658	2.89071	3.89595	0.0484028	0.0452553	-0.0344265	0.202536	0.0587137
Afap1l1	-0.117957	3.81597	1.21246	0.270845	-0.0680137	3.81597	0.402492	0.525805	0.0401443	-0.0191096	0.293576	0.546047
Aff4	-0.0821187	6.2114	3.07703	0.0794055	-0.0180021	6.2114	0.147802	0.700645	0.0283391	-0.00453956	0.0934954	0.714944
Afm	0.159047	8.24172	26.0071	3.40157e-07	0.0442657	8.24172	2.01512	0.155739	-0.0549684	0.0248044	4.05145e-06	0.176591
Afp	-0.310582	4.92545	1.24042	0.26539	0.132171	4.92545	0.226352	0.634242	0.0898782	-0.0997392	0.288066	0.65117
Aftph	0.0391599	5.91012	0.542138	0.461548	0.0296684	5.91012	0.311256	0.576911	-0.0130301	-0.00128799	0.483055	0.595628
Agap1	-0.480653	3.14549	13.7458	0.000209292	-0.175333	3.14549	1.83509	0.175527	0.161914	-0.0682998	0.000376785	0.197472
Agap3	0.205091	6.03572	4.73979	0.0294727	-0.0832074	6.03572	0.780373	0.377027	-0.0689963	-0.0260878	0.0369736	0.399429
Agfg1	0.100792	4.78102	2.18763	0.139124	-0.135385	4.78102	3.94715	0.0469509	-0.0352514	-0.0192431	0.157099	0.0572106
Agfg2	0.0725557	6.65658	2.55158	0.110184	0.00495755	6.65658	0.0119115	0.913092	-0.0262309	0.0350229	0.126604	0.917164
Agmo	-0.0352572	6.57947	0.513109	0.473796	-0.0239165	6.57947	0.236177	0.626981	0.010197	0.00574852	0.495481	0.643865
Agpat1	-0.286771	4.9659	21.9047	2.86529e-06	-0.0387288	4.9659	0.399032	0.52759	0.101641	0.00379639	4.05145e-06	0.547761
Agphd1	-0.246302	7.65832	63.9759	1.2595e-15	0.0442506	7.65832	2.06568	0.150648	0.0843742	0.0103762	0	0.171097
Agps	0.0234387	5.20044	0.115381	0.7341	0.120479	5.20044	3.05222	0.0806271	-0.00629312	0.00881715	0.745115	0.094962
Agrn	0.383822	5.21294	33.52	7.05359e-09	0.0673468	5.21294	1.03197	0.309698	-0.134205	-0.0257237	0	0.332782
Agt	-0.165782	10.7468	10.7067	0.0010675	-0.0256258	10.7468	0.255926	0.612933	0.0559575	0.0190421	0.0016773	0.630297
Agxt	1.09994	3.7903	61.5837	4.2431e-15	0.105026	3.7903	0.564921	0.452284	-0.354536	0.0220396	0	0.474385
Agxt2l2	0.066073	4.43632	0.654631	0.418462	0.0266994	4.43632	0.107007	0.743577	-0.0217722	-0.00608388	0.440535	0.756171
Ahcy	-5.46277	10.8774	62.9678	2.10109e-15	0.412491	10.8774	0.307383	0.579291	0.827401	-0.00951097	0	0.597768
Ahcyl1	-0.148301	5.61545	4.97211	0.0257592	-0.0372246	5.61545	0.313048	0.575816	0.0511167	0.0292875	0.0323995	0.594494
Ahdc1	-0.141603	5.00643	5.59702	0.017991	0.064816	5.00643	1.17288	0.27881	0.0455152	0.0466581	0.0232189	0.301586
Ahr	-0.195186	5.61663	10.5589	0.00115633	0.0226267	5.61663	0.141799	0.706499	0.0663603	0.00849544	0.00182721	0.720721
Ahsg	0.0701208	13.9166	8.47105	0.00360843	0.00952225	13.9166	0.15623	0.692652	-0.0250105	0.0113656	0.00511699	0.7074
AI413582	-0.393127	3.4603	14.5418	0.000137087	-0.0688935	3.4603	0.44512	0.504662	0.143085	0.0576794	0.000230933	0.525328
AI464131	-0.401944	8.41673	144.329	3.01097e-33	0.00681079	8.41673	0.0415284	0.838521	0.137817	0.00447619	0	0.847313
AI597479	-0.10999	3.38991	0.759572	0.383463	0.0822891	3.38991	0.425802	0.514056	0.0345078	0.00196767	0.406049	0.534395
AI607873	-0.00908508	3.01088	0.00326559	0.954429	-0.049811	3.01088	0.0999991	0.751831	5.02378e-05	-0.04373	0.957034	0.764448
AI661453	-0.149613	2.67344	1.16563	0.280301	-0.385324	2.67344	7.77776	0.00528934	0.0526272	-0.0627595	0.303571	0.00723184
AI987944	0.204922	2.74209	1.84395	0.174489	-0.12693	2.74209	0.709469	0.39962	-0.0666684	0.0286763	0.19402	0.422149
Aif1	0.821156	5.11202	42.634	6.60013e-11	-0.156571	5.11202	1.5659	0.210804	-0.273896	0.046484	0	0.233068
Aifm2	-0.601336	3.49351	38.9385	4.37376e-10	0.153296	3.49351	2.51894	0.112486	0.204722	0.0444799	0	0.129484
Aimp1	0.387834	4.81521	29.4783	5.6545e-08	0.102813	4.81521	2.07135	0.150088	-0.132533	0.0398004	0	0.17057
Ajuba	0.488499	2.6578	13.3961	0.000252145	-0.204797	2.6578	2.35672	0.124744	-0.163626	-0.00984919	0.000437557	0.142951
AK157302	1.51918	3.42131	223.732	1.38827e-50	-0.0369343	3.42131	0.131284	0.717104	-0.487239	-0.00670558	0	0.730809
Ak2	-0.0192358	9.90586	0.58287	0.445189	-0.0185824	9.90586	0.543938	0.460805	0.00610737	-0.00411771	0.466857	0.482524
Ak4	-0.396677	7.16041	77.3599	1.42477e-18	-0.0332334	7.16041	0.54377	0.460874	0.136033	-0.00279819	0	0.482597
Akap1	0.476729	7.30116	174.426	7.98826e-40	-0.010309	7.30116	0.0816828	0.77503	-0.163867	-0.00334102	0	0.787084
Akap10	3.75817	3.93214	585	3.06611e-129	-0.13869	3.93214	0.756758	0.384345	-0.858581	-0.0126379	0	0.406717
Akap11	-0.236338	5.14406	16.418	5.08014e-05	0.067812	5.14406	1.3507	0.245157	0.0816991	0.00859349	0.000117492	0.267181
Akap13	-0.131316	7.08367	12.654	0.000374766	0.031436	7.08367	0.725163	0.394456	0.0453891	0.000289614	0.000644181	0.416874
Akap2	0.0785253	4.16686	0.492545	0.482794	0.0466473	4.16686	0.174354	0.676271	-0.0271838	0.0349768	0.50413	0.69166
Akap8	-0.176123	3.24346	2.52149	0.112304	-0.0488494	3.24346	0.194454	0.659235	0.0619631	-0.0225095	0.129083	0.675604
Akap8l	0.141644	3.49424	1.89428	0.16872	0.094243	3.49424	0.838948	0.359698	-0.0482522	-0.00200277	0.187898	0.382388
Akap9	0.199681	7.18091	21.1083	4.34048e-06	-0.0419866	7.18091	0.933509	0.333953	-0.0699506	0.00403628	4.05145e-06	0.35682
Akirin1	-0.0385932	4.76159	0.251539	0.615993	0.0480448	4.76159	0.390346	0.532117	0.00983167	0.0115703	0.631771	0.552083
Akirin2	0.0858413	4.71298	1.16268	0.28091	0.0160102	4.71298	0.0404297	0.840643	-0.0312286	-0.00444025	0.304216	0.849249
Akr1a1	-0.0276233	7.71005	0.494798	0.481795	-0.0197547	7.71005	0.25306	0.614929	0.00924316	-0.0147708	0.503211	0.6321
Akr1c12	2.84958	6.81022	1357.61	3.41435e-297	-0.0478613	6.81022	0.410642	0.521644	-0.752494	-0.0130103	0	0.541878
Akr1c13	-0.646702	7.92779	158.769	2.10181e-36	-0.0452449	7.92779	0.781945	0.376547	0.217586	0.00474542	0	0.398951
Akr1c14	-0.251466	10.2192	62.1203	3.23106e-15	-0.0295497	10.2192	0.858757	0.354087	0.0862819	-0.0100569	0	0.37702
Akr1c18	-6.39427	5.06668	185.32	3.34196e-42	-0.115018	5.06668	0.104753	0.746199	0.955174	0.000714508	0	0.758857
Akr1c19	-0.824736	7.3553	217.984	2.48922e-49	-0.0166736	7.3553	0.0897622	0.76448	0.276554	-0.00622329	0	0.777134
Akr1c20	0.0961864	9.28015	4.1743	0.0410414	-0.0199478	9.28015	0.179562	0.67175	-0.0338302	0.0109633	0.050554	0.687285
Akr1c6	0.177163	12.0618	40.6443	1.82622e-10	-0.013848	12.0618	0.248483	0.618145	-0.0616102	-0.00508863	0	0.63543
Akr1e1	-1.01901	5.69532	42.7961	6.07527e-11	-0.334118	5.69532	4.64863	0.0310784	0.317763	-0.12611	0	0.0390114
Akt1	0.0708814	5.56421	1.19366	0.274592	-0.0506874	5.56421	0.610543	0.434583	-0.0244671	0.0394541	0.297579	0.457215
Akt1s1	0.197958	5.79226	14.55	0.00013649	-0.0612694	5.79226	1.39359	0.237799	-0.0695777	0.0064266	0.000230933	0.259901
Akt2	0.0594891	5.33858	0.629908	0.427389	0.0355579	5.33858	0.225062	0.63521	-0.0204648	0.00152848	0.449168	0.652122
Akt3	0.0580939	3.10646	0.128783	0.719697	0.0712933	3.10646	0.195553	0.658335	-0.0175055	0.0577233	0.731502	0.674757
Aktip	-0.485234	5.20333	47.1668	6.51964e-12	-0.0928299	5.20333	1.72657	0.18885	0.163261	0.00304016	0	0.211372
AL607123.1	-0.115789	4.89124	2.92096	0.0874358	0.0417244	4.89124	0.379532	0.537854	0.0398584	0.0484014	0.10206	0.557569
AL627077.2	-4.196	3.70177	632.684	1.30325e-139	0.46943	3.70177	6.96428	0.00831529	0.887469	0.0206002	0	0.0112387
Alad	-1.24596	7.52966	1008.45	2.61129e-221	0.0161571	7.52966	0.171899	0.678429	0.405823	0.00545517	0	0.693775
Alcam	0.53673	5.00281	41.0687	1.46972e-10	0.0922711	5.00281	1.21482	0.27038	-0.182233	0.00554143	0	0.293017
Aldh1a1	0.965625	12.5069	1475.09	0	0.0121461	12.5069	0.237458	0.626048	-0.322375	-0.00345736	0	0.642974
Aldh1a7	-2.46944	9.69362	356.64	1.51769e-79	0.180583	9.69362	2.09014	0.148252	0.675242	-0.00975203	0	0.168573
Aldh1b1	-0.0369437	5.3805	0.226853	0.633867	0.0104007	5.3805	0.0177467	0.894022	0.0203278	0.0348521	0.649254	0.899633
Aldh2	-0.126333	10.1308	26.3359	2.86912e-07	-0.0103684	10.1308	0.177431	0.673591	0.0433183	-0.00340814	4.05145e-06	0.689091
Aldh4a1	-0.0842927	7.74774	4.45227	0.0348548	0.0613375	7.74774	2.35737	0.124692	0.0292341	0.00323595	0.0432006	0.142899
Aldh5a1	-0.0576975	7.98342	2.21013	0.137107	-0.0311359	7.98342	0.643595	0.422412	0.0190101	0.0110904	0.155138	0.444955
Aldh8a1	0.285565	9.31048	123.242	1.23432e-28	0.00904217	9.31048	0.123696	0.72506	-0.0987598	-0.00212442	0	0.738394
Aldh9a1	0.13561	5.82417	6.6043	0.0101733	0.0211888	5.82417	0.161258	0.688001	-0.0477154	-0.026049	0.0136737	0.703093
Aldoc	-0.90312	3.29322	30.4681	3.39408e-08	-0.0779572	3.29322	0.225868	0.634605	0.298723	-0.0212756	0	0.65149
Alg1	-0.492596	6.54338	90.1803	2.17416e-21	-0.0264955	6.54338	0.261587	0.609032	0.167324	-0.0144259	0	0.626448
Alg2	-0.0489577	4.92464	0.44447	0.504973	-0.0231374	4.92464	0.0991997	0.752792	0.0133176	0.0118192	0.525567	0.765429
Alg6	-0.146878	3.70681	1.68856	0.193791	0.0768799	3.70681	0.462663	0.496382	0.0506145	-0.0151232	0.214395	0.51748
Alg9	0.376888	5.6978	30.3712	3.56789e-08	-0.0635147	5.6978	0.863703	0.352705	-0.129468	-0.0196541	0	0.375703
Alkbh5	-0.0274134	3.55117	0.0784592	0.779396	-0.128221	3.55117	1.71772	0.189987	0.0104058	-0.00804063	0.788222	0.212507
Alkbh6	-0.294508	5.20589	22.2029	2.45309e-06	0.0445254	5.20589	0.507565	0.476195	0.104029	-0.0129303	4.05145e-06	0.497567
Alpk1	1.03131	4.70835	166.648	3.99229e-38	-0.0861081	4.70835	1.15942	0.281585	-0.340103	-0.00302482	0	0.304301
Alpl	-0.423552	6.75079	49.7676	1.73075e-12	-0.0415724	6.75079	0.480227	0.488319	0.142345	0.0345397	0	0.509527
Als2cl	0.13954	3.5309	1.09389	0.295612	-0.0635638	3.5309	0.22477	0.635429	-0.0559147	0.0275266	0.318971	0.652316
Alyref	0.162349	4.01223	3.11145	0.0777437	-0.1004	4.01223	1.19042	0.275246	-0.0514947	0.00830515	0.091656	0.297891
Alyref2	0.193222	2.2784	1.93957	0.163716	0.153839	2.2784	1.22934	0.267536	-0.0624335	0.0401624	0.182635	0.290274
Ambp	0.0250786	12.8413	1.05456	0.304459	-0.0077866	12.8413	0.101662	0.749844	-0.00900455	-0.00771016	0.327759	0.762556
Ambra1	-0.351346	4.98653	17.6525	2.65164e-05	0.0607088	4.98653	0.527627	0.467606	0.120161	0.0194776	7.29262e-05	0.489371
Amd1	-8.40656	3.45797	1033.81	8.04527e-227	0.508126	3.45797	2.80755	0.0938218	0.997814	0.00218579	0	0.10926
Amdhd1	0.542214	6.97107	142.332	8.22981e-33	-0.0506605	6.97107	1.24491	0.264526	-0.186059	-0.0244999	0	0.287135
Amdhd2	0.117897	3.73292	1.50478	0.219937	0.117855	3.73292	1.50157	0.22043	-0.045314	0.0316075	0.241422	0.242727
Amigo2	-0.529495	4.38954	33.6131	6.72373e-09	0.024211	4.38954	0.0693969	0.792217	0.190272	0.0595707	0	0.803586
Ammecr1l	0.112935	4.9625	2.14748	0.142804	0.128027	4.9625	2.75933	0.096689	-0.0377886	0.0308117	0.160997	0.112286
Amotl2	-0.0670985	5.71972	1.00584	0.315902	-0.115493	5.71972	2.97987	0.0843058	0.0226177	-0.00108135	0.339042	0.0990621
Ampd3	-0.259877	2.76079	3.05085	0.0806951	0.157182	2.76079	1.11598	0.290785	0.0794332	-0.00709789	0.0948729	0.313392
Amz2	0.323617	3.22557	9.9545	0.00160457	0.00648873	3.22557	0.00425215	0.948008	-0.109031	0.0198243	0.00245923	0.951014
Anapc11	0.0643652	4.41328	0.845469	0.357837	0.0243503	4.41328	0.120911	0.728049	-0.0258252	0.016807	0.381104	0.741311
Anapc13	3.90776	6.08907	1890.11	0	-0.131355	6.08907	2.18841	0.139053	-0.873793	-0.00612684	0	0.158874
Anapc16	0.031262	3.93975	0.125639	0.722997	-0.113159	3.93975	1.6464	0.199449	-0.00910243	-0.0505344	0.734792	0.221623
Anapc5	-0.0514435	7.27983	0.731065	0.392538	0.0168491	7.27983	0.0783906	0.77949	0.0164367	0.00393505	0.415027	0.791601
Angel2	0.721212	6.06217	134.322	4.64543e-31	0.057851	6.06217	0.866727	0.351863	-0.243778	0.0232425	0	0.374853
Angptl1	-0.173911	2.74039	0.690744	0.405911	-0.182868	2.74039	0.762824	0.382446	0.0465351	-0.0882155	0.428291	0.404769
Angptl3	-0.0660611	10.923	5.86884	0.0154112	-0.00985297	10.923	0.130569	0.717843	0.0225488	-0.0111984	0.0202086	0.731494
Angptl4	-0.215851	7.66006	35.1228	3.09559e-09	7.10932e-05	7.66006	4.34179e-06	0.998337	0.0747458	-0.00397869	0	0.998408
Angptl7	-0.102068	4.3122	0.424675	0.514614	-0.182566	4.3122	1.35754	0.243964	0.0340041	-0.0416276	0.534727	0.265937
Ank	-0.838833	6.17551	176.759	2.47186e-40	0.0242616	6.17551	0.148158	0.700302	0.280582	-0.00829037	0	0.714644
Ank2	-4.41266	3.95711	215.374	9.23796e-49	0.417375	3.95711	2.10181	0.147125	0.88741	0.0257712	0	0.167309
Ank3	0.264863	5.73729	19.3363	1.09605e-05	0.0460321	5.73729	0.584452	0.444573	-0.0924704	0.0150007	1.62058e-05	0.46691
Ankhd1	-0.0215363	5.13086	0.0950707	0.757827	0.0663955	5.13086	0.904979	0.34145	0.00621397	0.0391722	0.767613	0.364424
Ankib1	0.100017	5.1767	2.96145	0.0852713	0.00817908	5.1767	0.0198011	0.888094	-0.0342595	-0.023166	0.0997792	0.893929
Ankmy2	-0.017172	4.21598	0.0211351	0.884412	-0.0711168	4.21598	0.363154	0.54676	0.00437136	-0.0727972	0.888938	0.566061
Ankrd10	0.141548	4.14248	1.15262	0.283001	0.051257	4.14248	0.15081	0.697762	-0.0437837	0.0959448	0.306351	0.712432
Ankrd11	-0.0222123	5.42191	0.128306	0.720195	-0.080396	5.42191	1.67967	0.194968	0.00685982	-0.0462049	0.731996	0.217454
Ankrd13a	-0.550005	3.13917	17.953	2.26426e-05	-0.136929	3.13917	1.11236	0.29157	0.17979	0.00110988	6.07718e-05	0.314198
Ankrd17	0.25505	7.02724	34.4843	4.29711e-09	0.0102955	7.02724	0.0561982	0.812609	-0.0885061	0.0161624	0	0.822806
Ankrd26	-0.0327338	4.42554	0.120865	0.728098	-0.207971	4.42554	4.88096	0.0271546	0.0104513	-0.0435879	0.739564	0.0345103
Ankrd33b	0.782616	3.89727	71.893	2.27188e-17	0.0212035	3.89727	0.053088	0.817775	-0.264388	0.0455111	0	0.827728
Ankrd40	-3.65619	7.60483	5243.91	0	-0.0471281	7.60483	0.891907	0.344961	0.852384	-0.000404514	0	0.367856
Ankrd42	-0.123672	3.34492	0.819024	0.365466	-0.129179	3.34492	0.892729	0.344739	0.039645	-0.0641007	0.388291	0.367621
Ankrd44	-0.196405	3.81506	2.73251	0.0983249	0.0804746	3.81506	0.458536	0.498309	0.0674732	0.0750452	0.113862	0.519372
Ankrd49	-0.0520404	4.49895	0.565063	0.452227	-0.0234766	4.49895	0.115138	0.734368	0.01906	0.0105249	0.473728	0.747311
Ankrd50	0.0762131	4.90333	1.25477	0.262644	-0.0480691	4.90333	0.499264	0.479824	-0.0276013	0.00774007	0.285218	0.501177
Ankrd52	-0.10926	5.90665	3.15874	0.0755214	0.0778247	5.90665	1.60275	0.205515	0.0369151	0.0270353	0.0893021	0.227789
Anks1	0.198932	6.02618	13.2375	0.000274404	0.0277092	6.02618	0.257041	0.61216	-0.0696079	0.0211331	0.000478072	0.629555
Anks3	0.225097	3.99236	5.57511	0.0182175	-0.00440305	3.99236	0.00208536	0.963577	-0.0734133	-0.0227639	0.0234336	0.965372
Ankzf1	-0.137788	2.57459	1.05761	0.303761	0.03052	2.57459	0.0514024	0.820641	0.0462775	-0.0271601	0.327013	0.83052
Ano1	0.196147	3.18452	1.56572	0.21083	-0.00538378	3.18452	0.00122397	0.972091	-0.0599008	-0.0879899	0.231913	0.973439
Ano6	0.265645	4.9595	12.6761	0.000370352	0.140109	4.9595	3.52793	0.0603431	-0.08808	0.0398148	0.000636078	0.0722617
Anp32a	0.0974626	3.34321	0.430678	0.511656	-0.00854586	3.34321	0.00320832	0.95483	-0.0262449	-0.0011834	0.53194	0.957204
Anp32e	0.29247	3.87374	8.64165	0.00328563	0.103261	3.87374	1.07767	0.299219	-0.0994312	0.00844536	0.00467538	0.322216
Antxr2	-1.22053	5.11431	218.458	1.96265e-49	0.00888733	5.11431	0.0117904	0.913533	0.396608	-0.00209682	0	0.917638
Anxa1	2.14021	4.22446	189.795	3.52452e-43	-0.291714	4.22446	3.63986	0.0564118	-0.612843	0.00468653	0	0.0679388
Anxa4	-0.248449	6.76733	31.7937	1.7145e-08	0.0167859	6.76733	0.145212	0.703154	0.0854918	-0.01596	0	0.717387
Anxa5	-0.07021	7.72742	1.02285	0.311843	0.110857	7.72742	2.5472	0.11049	0.0262039	0.0180339	0.335071	0.127378
Anxa6	0.0085812	8.43101	0.0612909	0.804467	-0.0467633	8.43101	1.81957	0.177364	-0.00378047	-0.00862783	0.812491	0.199481
Anxa7	-0.375796	6.07341	40.0775	2.44088e-10	0.0463265	6.07341	0.609926	0.434816	0.130256	0.0232135	0	0.457421
Aox1	-0.639277	7.25777	232.156	2.01868e-52	-0.0416753	7.25777	0.988587	0.320088	0.213879	-0.00606133	0	0.343069
Aox3	0.511657	10.3253	120.687	4.47339e-28	-0.0310979	10.3253	0.447959	0.503306	-0.17644	0.0119797	0	0.524108
Ap1ar	0.442354	5.82282	58.0806	2.51594e-14	-0.0486573	5.82282	0.703409	0.401641	-0.151503	0.0153907	0	0.424232
Ap1b1	-0.290754	3.98877	10.8948	0.000964336	0.034865	3.98877	0.156611	0.692296	0.0993053	0.028269	0.00149499	0.707064
Ap1g2	-0.189704	4.00179	3.0177	0.0823604	-0.0769239	4.00179	0.495438	0.481512	0.0637835	0.0485726	0.0966069	0.502846
Ap1m1	6.75754	3.23442	751.17	2.23352e-165	-0.136434	3.23442	0.15539	0.693437	-0.9858	-0.00655832	0	0.708194
Ap1s1	-0.0848926	4.97061	1.38782	0.238774	-0.0247815	4.97061	0.118313	0.730871	0.0304829	-0.0142482	0.261023	0.744033
Ap2a1	0.0665978	3.05954	0.223509	0.636379	-0.100655	3.05954	0.510005	0.475136	-0.024534	-0.0770158	0.651571	0.496562
Ap2b1	-0.0813747	6.57375	4.37737	0.0364192	-0.0676749	6.57375	3.02759	0.0818595	0.0270502	-0.00702699	0.0451048	0.0964043
Ap3m1	0.259409	6.91963	50.5312	1.17284e-12	-0.0328744	6.91963	0.811764	0.367599	-0.0899007	-0.00669541	0	0.390163
Ap4b1	-0.288383	5.2056	13.3755	0.000254935	0.0974711	5.2056	1.5282	0.216382	0.0990678	0.0131335	0.00044566	0.238578
Ap4e1	-0.398893	4.43753	17.3105	3.17426e-05	-0.112638	4.43753	1.38074	0.239975	0.134347	-0.0278345	7.69776e-05	0.26206
Ap4s1	-0.0732421	4.1887	0.537556	0.463447	-0.0945229	4.1887	0.894772	0.344187	0.0246125	0.037991	0.484914	0.367118
Ap5m1	-0.147469	4.99453	4.89693	0.0269045	0.0286368	4.99453	0.184784	0.667294	0.0524871	-0.019676	0.0338783	0.682978
Apbb3	0.135828	5.69311	5.21576	0.022383	-0.0168925	5.69311	0.0805899	0.7765	-0.0450772	-0.028361	0.0283683	0.788591
Apcs	-1.03432	6.04673	409.821	4.01015e-91	-0.0585203	6.04673	1.31368	0.25173	0.341739	0.0149879	0	0.273878
Aph1b	-0.797627	3.08271	19.3272	1.10127e-05	0.00114305	3.08271	2.87173e-05	0.995724	0.245323	-0.036803	1.62058e-05	0.995928
Aplp2	-0.0463713	8.7839	2.82989	0.0925246	-0.0111224	8.7839	0.162802	0.68659	0.0156387	-0.0101478	0.107546	0.701736
Apoa1	-0.104064	13.0315	19.6884	9.11537e-06	0.00314716	13.0315	0.0180112	0.89324	0.0355217	0.00243767	1.21544e-05	0.898936
Apoa2	0.0815431	15.1613	11.3423	0.000757621	-0.00718783	15.1613	0.0881413	0.766554	-0.0286636	-0.00420296	0.00122759	0.779005
Apob	-0.0761121	14.4856	11.1033	0.000861726	-0.00423941	14.4856	0.0344514	0.85275	0.0259195	-0.00208908	0.00138155	0.860671
Apobec1	-0.130457	5.59436	2.48399	0.11501	0.0312672	5.59436	0.142967	0.705349	0.0422177	-0.00528219	0.131927	0.719506
Apoc3	-0.25714	12.3446	106.452	5.87096e-25	0.00686197	12.3446	0.0759027	0.782929	0.088185	0.00862329	0	0.794851
Apof	-0.305848	11.3333	169.812	8.13209e-39	0.0212608	11.3333	0.821952	0.36461	0.105159	0.0070201	0	0.387181
Apoh	0.241491	11.6531	104.376	1.6731e-24	-0.0013554	11.6531	0.00329164	0.954248	-0.0840712	0.00339024	0	0.956653
Apol7d	-0.0224996	2.92388	0.0253434	0.873514	-0.162986	2.92388	1.32821	0.249124	0.00560228	0.00391545	0.878112	0.271241
Apold1	-0.0751014	4.09006	0.548301	0.459013	-0.0324029	4.09006	0.101681	0.749822	0.0251364	-0.0785944	0.480429	0.762532
Apom	0.287303	8.08187	46.463	9.33628e-12	0.0876525	8.08187	4.32804	0.0374895	-0.100574	0.0155548	0	0.0462757
Apon	0.935259	11.2367	1333.47	6.0334e-292	0.00927056	11.2367	0.133065	0.715276	-0.313691	0.0101736	0	0.729014
App	-0.442492	6.47471	43.8713	3.50699e-11	-0.00879555	6.47471	0.0174366	0.894947	0.149294	0.0111223	0	0.90044
Appl2	0.0446362	4.84794	0.288289	0.591319	-0.192552	4.84794	5.36373	0.0205598	-0.0163595	-0.0205868	0.608172	0.0267882
Aprt	-1.02814	6.02651	334.776	8.7605e-75	-0.00855243	6.02651	0.0232077	0.878918	0.340207	-0.0049466	0	0.885384
Aqp4	-3.34004	3.19008	275.519	7.11338e-62	0.164325	3.19008	0.759912	0.383356	0.814699	0.0522399	0	0.405696
Aqp9	-0.280827	8.53531	119.242	9.27038e-28	-0.00589137	8.53531	0.0524832	0.818797	0.0965811	-0.00366849	0	0.828733
Aqr	-0.808555	4.24976	73.718	9.01156e-18	-0.0356324	4.24976	0.144446	0.703901	0.272473	-0.0060284	0	0.718108
Arap1	0.113291	5.42344	3.29879	0.0693309	0.122772	5.42344	3.87399	0.0490397	-0.0375867	0.00231154	0.0823782	0.0594753
Arap2	-8.17899	2.7609	676.029	4.88188e-149	0.0663275	2.7609	6.00138e-10	0.99998	1	0	0	0.999733
Arap3	0.0457408	3.55007	0.133865	0.714458	0.00746023	3.55007	0.00359408	0.952195	-0.0228146	-0.0470483	0.726758	0.954729
Arcn1	3.1208	7.57497	1977.68	0	-0.0958984	7.57497	2.06446	0.150768	-0.790438	-0.0130429	0	0.171231
Arf1	0.0290364	6.0983	0.364902	0.545796	-0.0304927	6.0983	0.402381	0.525862	-0.0100051	-0.0175001	0.564724	0.546083
Arf5	-1.14115	6.09562	397.237	2.19976e-88	0.0243042	6.09562	0.181456	0.670125	0.371529	0.0157465	0	0.685684
Arf6	-0.0178044	5.35749	0.00614953	0.937495	-0.110674	5.35749	0.227721	0.633219	0.00561808	0.0103924	0.940683	0.650165
Arfgap1	-0.11777	5.73034	3.87337	0.049058	0.0226816	5.73034	0.143763	0.704568	0.0397531	0.00224044	0.059767	0.718752
Arfgap3	0.00841536	4.37607	0.00626986	0.936888	0.141251	4.37607	1.81878	0.177459	-0.00031834	0.0336827	0.940136	0.199587
Arfgef1	0.0635569	6.84688	2.64475	0.103892	-0.0123848	6.84688	0.100408	0.751341	-0.0220084	-0.00416891	0.119959	0.763934
Arfip1	0.145976	2.39262	0.698814	0.403182	0.0391148	2.39262	0.0504958	0.822203	-0.0528047	-0.0623042	0.425686	0.83212
Arfip2	-0.174773	4.02564	2.99205	0.0836744	0.0348764	4.02564	0.119248	0.729851	0.0633762	-0.0244341	0.0980735	0.743061
Arg1	-0.123625	11.6358	26.0808	3.27419e-07	0.0135881	11.6358	0.315165	0.574528	0.0426017	-0.0053375	4.05145e-06	0.593352
Arhgap1	0.311389	3.2681	1.50336	0.220155	0.11267	3.2681	0.197686	0.656595	-0.0959169	0.0867314	0.241657	0.672995
Arhgap12	0.0734156	5.66257	1.35383	0.244609	-0.00458213	5.66257	0.00526976	0.94213	-0.025562	0.024553	0.266865	0.945358
Arhgap15	-0.267056	2.48543	2.44361	0.118004	0.0589534	2.48543	0.118791	0.730349	0.0936693	-0.0992169	0.135132	0.743584
Arhgap19	1.28799	3.95432	149.726	1.99048e-34	-0.117926	3.95432	1.25918	0.261806	-0.416669	-0.0203272	0	0.284303
Arhgap26	-0.248006	6.03881	16.158	5.82712e-05	-0.029905	6.03881	0.235108	0.627762	0.083673	0.000856779	0.000121544	0.644688
Arhgap29	-0.253172	7.89588	48.1914	3.86578e-12	0.0117368	7.89588	0.103645	0.747499	0.0873555	-8.39856e-05	0	0.760259
Arhgap30	-0.042453	3.72994	0.21293	0.644481	0.0305277	3.72994	0.109675	0.740514	0.0159862	-0.0340439	0.65909	0.753202
Arhgap32	0.257147	4.62736	10.3884	0.00126811	-0.209519	4.62736	6.89463	0.00864552	-0.0914446	-0.0211513	0.00199737	0.0116965
Arhgap44	-0.747924	2.68257	19.4446	1.0356e-05	-0.276429	2.68257	2.63115	0.104786	0.244434	0.011887	1.62058e-05	0.121394
Arhgap5	-0.241127	4.69056	11.4711	0.000706861	0.00229109	4.69056	0.00104048	0.974268	0.081961	0.00596146	0.00113846	0.975444
Arhgdia	0.0857704	4.32717	1.30812	0.252736	0.0708954	4.32717	0.894005	0.344394	-0.0274911	-0.0174863	0.275175	0.367293
Arhgdib	0.458018	4.30546	17.958	2.25834e-05	-0.125971	4.30546	1.3579	0.243901	-0.156777	-0.0354408	5.67203e-05	0.265889
Arhgef1	0.113732	2.55451	0.171578	0.678714	-0.390541	2.55451	2.158	0.141829	-0.0439962	-0.0852382	0.692414	0.161973
Arhgef12	0.0444325	8.87213	2.36084	0.124415	-0.0269887	8.87213	0.871029	0.350671	-0.0161508	0.00553929	0.141825	0.373706
Arhgef15	-0.36632	5.03641	20.2493	6.79791e-06	-0.0126473	5.03641	0.0243246	0.876062	0.121285	0.00613378	8.10291e-06	0.882463
Arhgef17	0.100557	3.42286	0.647757	0.420916	0.156692	3.42286	1.57	0.210207	-0.0401021	0.0371638	0.442872	0.232456
Arhgef2	0.0333534	3.60155	0.0779991	0.780027	0.200232	3.60155	2.79343	0.0946515	-0.0105962	0.102954	0.788761	0.110127
Arhgef26	0.132606	5.59464	4.78601	0.0286919	-0.0167125	5.59464	0.0759922	0.782804	-0.0458271	-0.00721408	0.0360053	0.794709
Arhgef37	1.11255	5.892	303.274	6.37495e-68	-0.0454567	5.892	0.508226	0.475908	-0.365206	0.0068331	0	0.497288
Arhgef7	-0.138706	5.40053	6.63097	0.0100221	-0.0752156	5.40053	1.95007	0.162579	0.0485824	-0.0070118	0.0134427	0.183823
Arid1a	-0.084539	4.30164	0.693157	0.405093	-0.0767968	4.30164	0.573047	0.449051	0.0265379	-0.0252258	0.427493	0.471107
Arid4a	-0.294173	5.53714	24.5947	7.07461e-07	0.0107897	5.53714	0.0330343	0.855776	0.0993989	-0.0139097	4.05145e-06	0.863498
Arid5b	-0.133938	6.07632	6.88932	0.0086712	0.0324887	6.07632	0.404851	0.524595	0.0468458	0.00032167	0.0115953	0.544872
Arl1	0.106982	6.30692	3.92796	0.0474895	0.00430528	6.30692	0.00633994	0.936537	-0.0389071	0.0201891	0.0580452	0.939775
Arl15	0.0336107	4.10717	0.0963353	0.756273	0.0134467	4.10717	0.0153103	0.901525	-0.0125018	-0.012458	0.766251	0.90661
Arl4d	0.116344	6.2464	6.69155	0.00968707	-0.00867669	6.2464	0.0372351	0.846987	-0.0421033	0.0178729	0.0129201	0.855286
Arl5a	-0.467125	5.43732	45.8916	1.24983e-11	-0.155702	5.43732	5.10327	0.0238807	0.160422	-0.0388859	0	0.0306979
Arl6	-0.486308	3.24975	15.5329	8.1082e-05	-0.00241982	3.24975	0.000407954	0.983886	0.173618	0.0497742	0.000145852	0.984519
Armc1	0.0172307	6.51446	0.141864	0.706435	0.0549904	6.51446	1.44473	0.229375	-0.00520666	-0.00949106	0.719206	0.251559
Armc10	1.54868	6.10762	503.422	1.71152e-111	0.124388	6.10762	3.30669	0.0689985	-0.485095	-0.010389	0	0.0821027
Armc7	0.0614041	2.72189	0.27221	0.601853	0.101839	2.72189	0.749911	0.386504	-0.0205851	0.0531736	0.618345	0.408946
Armc8	-0.00272465	4.45972	0.000910295	0.975931	-0.00313888	4.45972	0.00115808	0.972853	0.0093336	-0.00782708	0.977097	0.974148
Armc9	0.00862465	3.2794	0.00170748	0.967039	-0.0206151	3.2794	0.00998576	0.920401	0.000628374	0.0702963	0.968642	0.923926
Arntl	0.0278433	3.87656	0.0554942	0.813765	-0.261288	3.87656	4.97575	0.0257051	-0.000953997	0.000118559	0.821728	0.0327763
Arpc1b	8.7682	6.56268	526.699	1.47594e-116	0.605925	6.56268	3.23761	0.0719656	-0.994025	0.00192465	0	0.0853034
Arpc2	0.0974873	4.1388	1.38478	0.239289	-0.0322953	4.1388	0.152178	0.696463	-0.0393334	-0.0490498	0.261533	0.711135
Arpc4	-0.0505168	6.43465	1.18573	0.276193	-0.0331374	6.43465	0.510119	0.475087	0.017218	0.00559495	0.299253	0.496514
Arpc5	0.117403	7.30185	12.5896	0.000387906	0.0169721	7.30185	0.26309	0.608005	-0.0405755	0.00774998	0.000656335	0.625399
Arpp19	2.84625	5.79717	1428.57	0	-0.0611333	5.79717	0.663866	0.415199	-0.752714	-0.00874026	0	0.437869
Arrb1	0.118444	4.89149	3.1482	0.0760108	-0.030342	4.89149	0.20666	0.649398	-0.0400874	0.00429155	0.0898167	0.66584
Arrb2	-0.197823	6.00571	11.7805	0.000598547	-0.0613782	6.00571	1.13449	0.286819	0.0677618	-0.0188008	0.000956143	0.309482
Arrdc3	0.180967	5.76762	12.4754	0.000412355	-0.022948	5.76762	0.200882	0.654009	-0.0627396	0.0229886	0.000704953	0.670568
Arrdc4	0.270541	3.99058	3.83659	0.0501454	-0.0194802	3.99058	0.0203301	0.886619	-0.109511	-0.0219718	0.060942	0.892604
Arsb	0.358641	3.38001	6.45161	0.0110852	-0.188287	3.38001	1.77683	0.182539	-0.121894	-0.0298677	0.0148324	0.20491
Arsg	1.42712	5.53229	188.577	6.5012e-43	0.121991	5.53229	1.40919	0.235192	-0.443309	0.0357374	0	0.257304
Arsk	0.414559	5.1109	29.8744	4.60967e-08	0.0218435	5.1109	0.0830968	0.773144	-0.142655	-0.000705283	0	0.785232
Art4	0.137031	3.78593	1.56096	0.211525	-0.0204911	3.78593	0.0351464	0.851289	-0.0467423	0.00853299	0.232659	0.859297
Asap1	-0.0664323	5.62638	1.37034	0.241754	0.019509	5.62638	0.118171	0.731026	0.0239153	0.00441633	0.264058	0.744183
Asap3	0.105245	3.93472	0.960187	0.32714	-0.0943578	3.93472	0.773722	0.379068	-0.0297032	-0.0215967	0.350536	0.401454
Asb1	0.400747	4.64176	21.5067	3.52588e-06	-0.0701377	4.64176	0.65911	0.416874	-0.136504	0.00087263	4.05145e-06	0.439437
Asb13	-0.443166	6.82093	115.478	6.18299e-27	-0.0349408	6.82093	0.718468	0.396647	0.151697	-0.00789009	0	0.419038
Asb3	-0.147579	2.89214	1.09233	0.295957	-0.0724213	2.89214	0.264413	0.607105	0.0439597	-0.0767801	0.319323	0.624576
Ascc1	0.524542	4.39641	34.3912	4.50762e-09	-0.051785	4.39641	0.335162	0.562635	-0.181471	-0.0253786	0	0.581849
Ascc2	0.351856	4.54293	17.3115	3.17267e-05	-0.0187216	4.54293	0.048836	0.825101	-0.12216	-0.0219759	7.69776e-05	0.83468
Ascc3	-0.0390029	5.17642	0.470531	0.492743	-0.0591434	5.17642	1.08208	0.298232	0.0112592	-0.0209621	0.513862	0.321102
Asgr1	-0.192821	9.80104	49.1171	2.41127e-12	0.00518568	9.80104	0.0355449	0.850458	0.0661167	-0.00131219	0	0.85858
Asgr2	-0.00907975	10.1886	0.126076	0.722536	0.017167	10.1886	0.450687	0.502009	0.00270211	0.00580011	0.734334	0.522929
Ash1l	-0.0264944	5.77812	0.163431	0.686017	0.112479	5.77812	2.94584	0.0860988	0.00894405	0.0322453	0.699471	0.100999
Asl	-4.96152	3.24112	453.589	1.19407e-100	0.283163	3.24112	1.16146	0.281163	0.940759	0.0255011	0	0.303932
Asnsd1	0.168559	3.4003	3.14404	0.0762046	-0.0102066	3.4003	0.0116644	0.913994	-0.0554621	0.0314626	0.0900273	0.918007
Aspdh	0.0628222	7.8841	3.21764	0.0728486	0.0113532	7.8841	0.105122	0.745767	-0.0217589	0.00828296	0.086377	0.758448
Aspg	-0.100707	7.7752	5.549	0.0184913	-0.0116159	7.7752	0.073833	0.785836	0.0355301	-0.0235257	0.0237294	0.797464
Asph	0.264467	7.51382	51.0252	9.11861e-13	-0.0031608	7.51382	0.00729393	0.93194	-0.0914199	0.00383671	0	0.935286
Asrgl1	0.0833643	3.33731	0.288367	0.591269	0.0376727	3.33731	0.05875	0.808483	-0.026189	0.0910062	0.608111	0.818831
Asun	-0.108555	5.57986	3.18256	0.0744281	-0.0320351	5.57986	0.277056	0.598637	0.0367641	-0.00791478	0.0880908	0.616315
Atad2	0.163321	4.23583	2.35367	0.124989	-0.0405814	4.23583	0.145696	0.702683	-0.0588798	0.0771084	0.142429	0.716913
Atad3a	-9.02477	4.50448	548.007	3.41641e-121	-0.395618	4.50448	0.915681	0.338612	0.995781	0.00421856	0	0.361511
Atad5	-0.537079	3.03847	13.0823	0.000298103	-0.0308093	3.03847	0.0424381	0.836787	0.182244	0.0475117	0.000518586	0.845721
Atat1	0.54749	4.21521	12.6387	0.000377844	-0.146312	4.21521	0.907602	0.340752	-0.174993	-0.0380318	0.000644181	0.363731
Ate1	8.31533	2.89162	755.077	3.15774e-166	-0.0102907	2.89162	5.87414e-12	0.999998	-1	0	0	0.999733
Atf1	-0.109876	4.36179	1.58098	0.208619	0.0458057	4.36179	0.275079	0.599945	0.0342142	0.00131702	0.229697	0.617681
Atf2	-0.329149	3.83876	7.15833	0.00746165	0.00653164	3.83876	0.00281671	0.957674	0.104367	0.0403885	0.0101489	0.95987
Atf4	0.148812	7.02711	17.7475	2.52249e-05	0.0373986	7.02711	1.12098	0.289707	-0.0516674	-0.00624588	7.29262e-05	0.312266
Atf5	0.411912	8.21229	68.3235	1.38755e-16	0.0243194	8.21229	0.238812	0.625065	-0.140222	0.000530551	0	0.642058
Atf6	-0.224321	7.15326	28.1812	1.1047e-07	0.0142186	7.15326	0.113307	0.736411	0.0773673	-0.000832943	0	0.74941
Atf6b	0.111105	5.13479	1.41719	0.233867	0.0135547	5.13479	0.0210186	0.884728	-0.0391505	0.00602196	0.255841	0.890627
Atf7ip	0.0474134	6.61291	1.04558	0.306527	-0.009299	6.61291	0.0402083	0.841074	-0.01789	0.00449806	0.329683	0.849651
Atg12	-0.170801	3.30439	3.18394	0.074365	-0.0124596	3.30439	0.0169489	0.896418	0.0646206	0.00581983	0.0880178	0.901801
Atg13	-0.110824	2.71451	0.471879	0.492124	-0.000522079	2.71451	5.0341e-06	0.99821	0.0424169	0.0440563	0.513299	0.998286
Atg16l1	-0.130444	4.75617	2.81722	0.0932577	-0.00163394	4.75617	0.000442168	0.983223	0.0448723	0.0114882	0.108368	0.983891
Atg3	-0.0938319	7.14009	4.9537	0.0260348	-0.0165844	7.14009	0.154798	0.693992	0.0319359	-0.00598016	0.0327276	0.7087
Atg4a-ps	-2.53523	4.49913	419.279	3.50248e-93	-0.0753485	4.49913	0.369633	0.543205	0.692842	-0.0541363	0	0.562779
Atg4b	0.124519	5.31445	3.66787	0.0554709	-0.0229396	5.31445	0.124452	0.724255	-0.0440264	-0.0186578	0.0669381	0.737676
Atg4c	0.18049	4.06125	2.56805	0.109042	0.021894	4.06125	0.0377052	0.846036	-0.0593666	0.00472581	0.125417	0.854375
Atg7	0.0866893	5.13638	1.00785	0.315419	0.0323662	5.13638	0.140555	0.707729	-0.0271168	-0.0286611	0.338531	0.721949
Atg9a	-0.0629237	5.67094	1.5264	0.216653	-0.0604256	5.67094	1.40749	0.235473	0.0224896	-0.0230047	0.238063	0.257632
Atic	-0.439697	6.53254	85.6976	2.09671e-20	-0.0272917	6.53254	0.330372	0.56544	0.149297	-0.00125491	0	0.584681
Atl3	2.017	3.02519	215.057	1.08315e-48	-0.199428	3.02519	2.00896	0.156373	-0.601932	-0.0176858	0	0.17715
Atm	0.0809391	3.12509	0.21499	0.642884	-0.590394	3.12509	11.1661	0.000833058	-0.0231002	-0.108935	0.657632	0.00121949
Atmin	-0.410004	4.39456	25.8251	3.73801e-07	-0.0795117	4.39456	0.971706	0.324255	0.139444	0.0254069	4.05145e-06	0.347319
Atp11a	1.19854	7.84009	483.487	3.72336e-107	-0.035709	7.84009	0.438143	0.50802	-0.391507	-0.000219289	0	0.528415
Atp11b	-8.52757	3.09351	834.928	1.37521e-183	-0.144506	3.09351	1.91686e-09	0.999965	1	0	0	0.999733
Atp13a3	-0.11679	8.05064	11.9755	0.000539035	0.0124622	8.05064	0.136376	0.711911	0.0404042	-0.00618318	0.00089132	0.725834
Atp1a1	-0.240058	8.29421	63.8827	1.32054e-15	0.0139324	8.29421	0.215259	0.642676	0.0823394	-0.000723589	0	0.659086
Atp1b3	-0.141481	6.26237	8.09814	0.00443107	-0.00872042	6.26237	0.0308078	0.86067	0.0491801	-0.0216849	0.00618657	0.868024
Atp2b1	-0.843163	3.24638	41.2417	1.34519e-10	0.0066397	3.24638	0.00249731	0.960144	0.27955	-0.0237983	0	0.962261
Atp2b4	0.171178	2.52677	1.13759	0.286162	0.0586475	2.52677	0.133995	0.714325	-0.0644573	-0.0450533	0.309644	0.728164
Atp5b	0.106226	11.6779	20.2056	6.95507e-06	-0.00211991	11.6779	0.0080487	0.928514	-0.0371866	-0.00299406	8.10291e-06	0.931883
Atp5e	0.455825	8.45404	202.797	5.12315e-46	-0.0145141	8.45404	0.206054	0.649878	-0.157274	-0.018361	0	0.666282
Atp5g1	-0.966263	8.52141	1060.17	1.49567e-232	-0.0147722	8.52141	0.250294	0.616868	0.322606	-0.0107142	0	0.634089
Atp5g3	-0.0668452	2.60556	0.207289	0.648901	-0.155467	2.60556	1.11491	0.291017	0.0212804	0.0712525	0.663288	0.313627
Atp5j	1.99856	8.66	2006.33	0	0.00339532	8.66	0.00609246	0.937785	-0.598609	0.016256	0	0.941059
Atp5s	-0.0531228	3.06696	0.105775	0.745007	0.0120558	3.06696	0.00571447	0.939742	0.0174764	0.0764678	0.75573	0.942943
Atp5sl	0.823394	5.88765	242.967	8.86735e-55	0.101542	5.88765	3.69656	0.0545249	-0.277185	0.0224904	0	0.0658361
Atp6v0a1	0.187159	4.70847	6.51391	0.0107034	0.0645561	4.70847	0.775038	0.378663	-0.0656855	0.0182579	0.0143867	0.401086
Atp6v0a4	0.827212	2.51457	24.9144	5.9934e-07	-0.0370912	2.51457	0.0424347	0.836793	-0.268311	0.0115394	4.05145e-06	0.845725
Atp6v0b	0.0418558	7.4402	1.39902	0.236888	-0.0115946	7.4402	0.107361	0.743168	-0.0155155	-0.00217193	0.259022	0.755823
Atp6v0e	-0.382193	6.77695	42.2847	7.89065e-11	-0.0844764	6.77695	2.06941	0.15028	0.127913	0.0117954	0	0.17072
Atp6v1b2	0.033605	6.01235	0.291244	0.589424	-0.0101696	6.01235	0.0266623	0.870293	-0.0121671	0.00334736	0.606268	0.877051
Atp6v1g1	0.0216629	6.34923	0.211967	0.64523	0.0740523	6.34923	2.47617	0.115583	-0.00799021	0.0358798	0.65984	0.132924
Atp6v1g2	0.609483	5.28721	46.4964	9.17867e-12	-0.0421235	5.28721	0.223006	0.636759	-0.207576	0.0532306	0	0.653613
Atp6v1h	-0.161448	5.27912	5.87381	0.0153677	-0.00778183	5.27912	0.0136512	0.906988	0.056819	-0.0136353	0.0201884	0.91163
Atp8a1	-0.0580404	4.31061	0.55205	0.457481	0.206183	4.31061	6.97302	0.00827476	0.0217234	0.00678365	0.478841	0.0111901
Atp8b1	0.146345	7.39871	16.4576	4.97494e-05	-0.0251599	7.39871	0.486574	0.48546	-0.050977	0.000330378	0.000117492	0.506634
Atp8b2	-0.252883	2.43559	2.49314	0.114343	-0.0129781	2.43559	0.00615517	0.937466	0.0892032	-0.0170944	0.131251	0.940756
Atp8b5	-0.0245369	5.32591	0.0777053	0.780432	0.0597801	5.32591	0.462168	0.496612	0.0057229	0.0138354	0.789166	0.517731
Atp9b	0.157323	4.86269	2.71485	0.0994182	0.0134301	4.86269	0.019803	0.888089	-0.054838	0.0269643	0.115183	0.893913
Atpaf1	-0.0760832	4.26343	0.879093	0.34845	0.129166	4.26343	2.53199	0.111559	0.0296209	0.0305829	0.371875	0.128496
Atpaf2	-0.205742	2.92789	2.06699	0.150518	0.246327	2.92789	2.96397	0.0851385	0.072343	0.0392839	0.169043	0.0999575
Atpif1	-0.00302425	5.78526	0.00272409	0.958375	0.111847	5.78526	3.74287	0.0530331	0.000872664	0.00627761	0.960693	0.0641953
Atr	-0.280307	5.05007	15.8236	6.95314e-05	0.0128468	5.05007	0.0332998	0.855204	0.0956089	0.00742224	0.000129647	0.862956
Atrnl1	-1.47679	7.61464	1429.02	0	-0.0150339	7.61464	0.150721	0.697847	0.47038	-0.0115177	0	0.712513
Atxn2	-0.175894	3.49016	2.8731	0.0900709	-0.0727226	3.49016	0.491248	0.483371	0.0585692	-0.0143703	0.104876	0.50469
Atxn2l	-0.048144	2.49461	0.091829	0.761865	-0.0490669	2.49461	0.0956104	0.757162	0.00915038	-0.0591682	0.771247	0.769906
Atxn3	-0.0756782	2.97529	0.323003	0.569809	0.0367297	2.97529	0.0761823	0.782539	0.0248075	0.0834312	0.587817	0.79445
Atxn7	0.120366	3.35934	0.965498	0.325805	0.110829	3.35934	0.817306	0.365969	-0.0511992	-0.0369037	0.349122	0.388482
Atxn7l3	-0.00161126	5.41614	0.000708735	0.978761	-0.0711428	5.41614	1.36342	0.242946	0.00285096	-0.0433958	0.979856	0.264965
AU021092	-0.004221	3.53029	0.00114979	0.97295	-0.14784	3.53029	1.46761	0.225723	-0.000870996	-0.0506274	0.974306	0.24801
AU022252	0.274413	5.2457	13.842	0.000198838	0.0164956	5.2457	0.0500355	0.823002	-0.0927661	-0.0180763	0.000356528	0.832809
Auh	-0.150834	6.04362	7.57528	0.00591743	0.00463174	6.04362	0.00715357	0.932596	0.0536243	0.0046759	0.00804214	0.935967
Aurkaip1	0.00859362	7.07392	0.0427815	0.836137	0.0126687	7.07392	0.0929807	0.760421	-0.00276332	-0.00563041	0.84218	0.773131
AV039307	0.298125	2.93806	5.95431	0.0146813	-0.208038	2.93806	2.89925	0.0886205	-0.0996243	-0.0220333	0.0192728	0.103604
Aven	0.165605	4.85651	2.94363	0.0862169	-0.0175354	4.85651	0.0329822	0.855889	-0.0566399	-0.0148639	0.100752	0.863567
AW495222	0.369914	3.7491	21.5459	3.45456e-06	0.00835189	3.7491	0.0110706	0.916204	-0.128707	0.00889914	4.05145e-06	0.920053
Axin1	0.330933	4.75786	16.7461	4.27308e-05	0.0334385	4.75786	0.170913	0.679302	-0.113299	0.024242	9.72349e-05	0.69461
Axin2	-0.00792428	3.23786	0.00274716	0.958199	0.0427971	3.23786	0.0788769	0.778825	0.00205725	-0.0804147	0.960579	0.790981
AY036118	3.17429	9.98884	407.41	1.34222e-90	0.141664	9.98884	0.935524	0.333432	-0.776529	0.00779177	0	0.356277
Azgp1	-0.0224193	11.574	0.88518	0.346787	0.00731886	11.574	0.0943367	0.758735	0.00740419	-0.000548994	0.370315	0.771437
Azin1	-0.189192	4.60659	6.46353	0.0110111	0.0658598	4.60659	0.782716	0.376312	0.0630176	0.00165496	0.0147392	0.398687
B230118H07Rik	-0.186484	6.09323	6.72677	0.00949766	-0.0367892	6.09323	0.261664	0.608979	0.062865	0.040896	0.0126648	0.626395
B230120H23Rik	0.0540163	5.27071	0.663391	0.415365	0.0846971	5.27071	1.63033	0.201657	-0.0193089	0.00547436	0.4375	0.223948
B230206L02Rik	-1.55618	4.19421	179.058	7.78317e-41	0.111599	4.19421	0.925677	0.335989	0.48341	0.0050426	0	0.358825
B2m	0.290687	12.9144	144.44	2.84692e-33	0.0185326	12.9144	0.58805	0.443174	-0.1008	0.00602009	0	0.465548
B3galt6	0.145215	4.19958	2.20892	0.137215	-0.183691	4.19958	3.5348	0.0600936	-0.0492451	-0.0598756	0.155248	0.072051
B3galtl	-0.17229	3.86625	1.68288	0.194542	-0.0196096	3.86625	0.0217101	0.882861	0.0543325	0.0866571	0.215197	0.888893
B3gnt1	0.181924	4.80611	6.61294	0.010124	-0.0753982	4.80611	1.13611	0.286476	-0.0630445	-0.0175842	0.0135764	0.309138
B3gnt2	0.0905216	4.16664	1.10421	0.293345	-0.095321	4.16664	1.22372	0.268632	-0.0336575	-0.0195181	0.316751	0.291344
B430306N03Rik	-0.232872	3.17813	3.00338	0.0830908	-0.031147	3.17813	0.0532886	0.817437	0.080047	0.00137171	0.0974334	0.827408
B4galnt1	-0.0842707	5.94439	1.78724	0.181263	-0.016066	5.94439	0.0650121	0.798743	0.0277369	0.00726496	0.201199	0.809736
B4galt1	0.0333343	3.45755	0.0717796	0.788763	-0.0784153	3.45755	0.397526	0.52837	-0.0109847	0.00666616	0.797294	0.548518
B4galt2	0.12117	2.27818	0.56894	0.45068	-0.133575	2.27818	0.690893	0.405861	-0.0509917	-0.0829914	0.472331	0.428555
B630019A10Rik	2.2858	2.87306	177.814	1.45481e-40	-0.0119126	2.87306	0.00748431	0.93106	-0.65063	-0.00576737	0	0.934399
B930036N10Rik	0.0528381	2.3778	0.106287	0.744411	0.267638	2.3778	2.74609	0.0974924	-0.0183422	0.0821869	0.75515	0.113246
B930095G15Rik	-0.0886947	3.07095	0.546594	0.459713	0.0479441	3.07095	0.160135	0.689032	0.0234302	0.0781949	0.481126	0.704045
Bach2	0.059155	4.53166	0.707339	0.400329	0.122959	4.53166	3.05757	0.080362	-0.0151363	0.00297947	0.422891	0.0946298
Bag3	-0.0305541	3.61652	0.104121	0.746939	0.0632238	3.61652	0.447007	0.50376	0.00990628	-0.00740713	0.757525	0.524489
Bag5	0.274579	4.75371	13.9342	0.000189326	-0.151689	4.75371	4.25169	0.0392113	-0.0968789	-0.00741518	0.000332219	0.0483865
Bag6	0.500735	7.60484	36.579	1.46599e-09	-0.0617617	7.60484	0.558948	0.454684	-0.170502	0.0418452	0	0.476674
Bahd1	-0.207845	4.45103	5.36766	0.0205135	-0.0467507	4.45103	0.271368	0.602415	0.0712861	0.00948148	0.0261157	0.620176
Bak1	0.406637	3.51073	13.3644	0.000256449	0.0636062	3.51073	0.327339	0.56723	-0.13581	-0.0182157	0.000449711	0.586468
Banp	0.390565	3.72858	8.54355	0.00346748	-0.0846186	3.72858	0.402272	0.525918	-0.132801	-0.0199598	0.00493872	0.546136
Baz1a	-0.12311	3.66931	0.977318	0.322862	-0.0518959	3.66931	0.173989	0.676591	0.040594	-0.0264718	0.34612	0.691976
Baz2a	0.188756	6.48663	14.4219	0.000146092	0.0562681	6.48663	1.28192	0.257542	-0.064822	0.00826312	0.000247139	0.279874
Bbc3	0.372692	2.49536	3.44162	0.0635731	-0.111482	2.49536	0.305803	0.580267	-0.122594	-0.0138546	0.0760498	0.598704
Bbox1	-0.0641182	8.05784	4.97025	0.0257869	-0.0571316	8.05784	3.94599	0.0469832	0.0220851	-0.000989479	0.0324319	0.0572268
Bbs10	-0.399619	4.41946	23.8889	1.02061e-06	-0.130321	4.41946	2.53934	0.111041	0.139544	-0.0240104	4.05145e-06	0.127977
Bbs7	-0.180844	2.85855	0.577346	0.447354	0.108589	2.85855	0.207516	0.648721	0.0573657	0.0201652	0.469061	0.665127
Bbx	-0.120859	3.99755	1.21559	0.270228	-0.0529345	3.99755	0.233232	0.629138	0.0388826	0.00365656	0.292965	0.646012
BC003331	0.499883	7.33521	190.567	2.39035e-43	0.00340283	7.33521	0.0088306	0.925132	-0.172248	0.0171101	0	0.928601
BC003965	-0.0402032	5.19401	0.501317	0.478922	0.0212744	5.19401	0.140377	0.707906	0.0140994	0.00778465	0.500278	0.722131
BC004004	0.155826	6.56815	13.5268	0.000235185	0.00806667	6.56815	0.0362486	0.849003	-0.0547969	0.0140562	0.0004173	0.857215
BC005537	-0.011482	6.11845	0.055684	0.813452	-0.0446519	6.11845	0.842465	0.358693	0.00318704	-0.0336276	0.821412	0.381493
BC016423	0.00699146	6.15638	0.0207375	0.885496	0.011213	6.15638	0.053333	0.817362	-0.00260752	-0.0224814	0.890088	0.827331
BC018507	0.354127	5.71668	51.0171	9.15645e-13	0.0514507	5.71668	1.07671	0.299434	-0.122055	0.00474656	0	0.322467
BC023719	-0.472444	5.50952	1.40388	0.236074	-0.123418	5.50952	0.0989464	0.753098	0.121615	-0.00507261	0.258065	0.765713
BC026585	0.918916	6.08698	265.717	9.73706e-60	0.0744701	6.08698	1.74788	0.186143	-0.308804	-0.00800524	0	0.208711
BC029722	0.226746	4.86131	13.9244	0.000190311	0.0110112	4.86131	0.0326497	0.856609	-0.0808386	0.0230269	0.000332219	0.864228
BC039771	-0.0803462	3.25175	0.317446	0.573146	0.121151	3.25175	0.72192	0.395515	0.0274406	0.0147637	0.59084	0.417766
BC046401	-0.232077	3.61599	4.38852	0.0361817	-0.0395835	3.61599	0.127593	0.720941	0.0795325	0.00183545	0.0448212	0.734411
BC048403	0.511379	3.37547	15.0394	0.000105293	0.0711204	3.37547	0.291227	0.589435	-0.160742	0.0335822	0.00019447	0.607592
BC048644	-1.28247	6.22136	615.665	6.55621e-136	0.00780731	6.22136	0.0225304	0.880685	0.418973	0.0101657	0	0.8869
BC051226	0.1887	2.97202	1.52501	0.216863	-0.172609	2.97202	1.28002	0.257896	-0.0530679	0.100478	0.238306	0.280255
BC053749	0.0302068	3.19673	0.0543238	0.815703	-0.281109	3.19673	4.71472	0.0299055	-0.0128373	-0.0252516	0.823539	0.0376704
BC056474	0.563641	3.23962	15.2742	9.29799e-05	0.0703507	3.23962	0.239363	0.624666	-0.178007	0.0240698	0.000170161	0.641677
BC068281	-0.696509	2.45424	9.43739	0.00212606	0.279087	2.45424	1.49909	0.220811	0.216709	0.0830402	0.00313177	0.243083
BC089597	-2.05402	8.597	74.0207	7.73019e-18	-0.309186	8.597	1.73904	0.18726	0.547205	0.012949	0	0.209833
BC096441	-1.15681	4.9467	165.934	5.71726e-38	-0.00401478	4.9467	0.00197248	0.964575	0.37481	0.0148537	0	0.96632
Bcar1	0.0243898	6.27482	0.339903	0.559885	0.033367	6.27482	0.636248	0.425073	-0.0081351	-0.00221728	0.578114	0.447556
Bcar3	-0.00982443	6.88847	0.0547248	0.815037	0.0399226	6.88847	0.903647	0.341806	0.00356783	0.000934476	0.822939	0.364817
Bcas3	0.0137132	4.40498	0.0142813	0.904876	-0.169776	4.40498	2.18097	0.139726	-0.00551016	-0.0729424	0.908948	0.159656
Bcdin3d	0.227275	3.25335	3.69895	0.0544469	0.0136383	3.25335	0.013422	0.907769	-0.0756594	0.0313215	0.0658969	0.912286
Bche	-0.37078	5.93678	25.6765	4.03704e-07	-0.0317321	5.93678	0.188062	0.664534	0.12691	0.0127452	4.05145e-06	0.680547
Bckdha	1.94299	2.43609	122.566	1.73572e-28	0.060118	2.43609	0.0972211	0.75519	-0.577856	-0.00780552	0	0.76784
Bckdhb	-0.493483	7.25166	121.102	3.63041e-28	0.00468324	7.25166	0.0109424	0.916688	0.167851	-0.0137712	0	0.920519
Bcl2l13	-0.072063	5.79131	1.61992	0.203103	0.0097394	5.79131	0.0295513	0.863512	0.0225093	-0.0211825	0.22407	0.870637
Bcl2l2	0.0642342	3.45845	0.603053	0.437416	-0.0659188	3.45845	0.634887	0.425568	-0.0255368	0.0121666	0.459188	0.448091
Bcl6b	-0.167853	2.90509	0.813003	0.367234	0.0296401	2.90509	0.0248648	0.874704	0.0622503	0.0717132	0.389936	0.88113
Bcl7a	0.940984	2.53238	32.7464	1.04999e-08	-0.0157626	2.53238	0.00977817	0.92123	-0.309479	-0.0330521	0	0.924809
Bcl9l	0.160979	3.54698	0.835018	0.360826	-0.186761	3.54698	1.12294	0.289287	-0.059487	0.0104712	0.383904	0.311848
Bclaf1	-0.820056	4.27416	101.949	5.69608e-24	0.0418353	4.27416	0.262972	0.608086	0.277444	0.0316377	0	0.625492
Bcmo1	-0.175689	4.74424	4.41625	0.0355982	-0.0169512	4.74424	0.0412509	0.839054	0.0584402	0.00273643	0.0441122	0.847819
Bcs1l	-0.148718	3.38329	1.38805	0.238735	0.14355	3.38329	1.29478	0.255169	0.0557794	0.0959375	0.260999	0.277423
Bdh1	0.0925009	9.55191	10.787	0.00102218	0.0176197	9.55191	0.391441	0.531543	-0.0324386	0.00331926	0.00160843	0.551484
Becn1	0.0516321	7.03671	1.76412	0.184111	0.0277738	7.03671	0.510513	0.474917	-0.0179583	0.000827954	0.20423	0.496335
Bend4	0.397674	2.57702	9.28126	0.0023151	0.17861	2.57702	1.86623	0.171907	-0.136449	0.0669777	0.00341538	0.193749
Bend7	-0.578663	4.37923	43.8384	3.56639e-11	0.0185281	4.37923	0.0443774	0.833153	0.199572	-0.00397138	0	0.842066
Bet1	0.12463	3.68287	1.07414	0.300012	-0.0344921	3.68287	0.0827241	0.773639	-0.039381	-0.043213	0.323367	0.785698
Bhlhe40	-0.264531	5.14194	18.6054	1.60766e-05	0.0733012	5.14194	1.42745	0.232181	0.0922413	0.00529723	4.4566e-05	0.254261
Bhlhe41	1.04573	3.292	43.9655	3.34209e-11	-0.38472	3.292	5.95249	0.0146965	-0.348223	0.00708779	0	0.0195077
Bhmt	0.643844	12.3804	642.009	1.2217e-141	-0.00157932	12.3804	0.00389764	0.95022	-0.21916	-0.0149376	0	0.952938
Bhmt-ps1	-0.768435	4.96342	153.493	2.98829e-35	-0.0777637	4.96342	1.55647	0.212182	0.25689	-0.0286836	0	0.234409
Bhmt2	-0.222756	7.91911	44.6042	2.41169e-11	-0.0365908	7.91911	1.20403	0.272518	0.0761651	-0.00653344	0	0.295148
Bicc1	-0.0259238	2.80138	0.0211153	0.884465	0.112641	2.80138	0.403677	0.525196	0.00119245	0.0550854	0.88901	0.545447
Bid	0.980434	5.68822	169.637	8.88012e-39	-0.00958118	5.68822	0.016373	0.898183	-0.324821	0.0140705	0	0.903446
Bik	0.400828	3.72005	11.5037	0.000694595	-0.0262926	3.72005	0.0495447	0.823857	-0.134314	0.000605369	0.00111415	0.833562
Birc6	-0.0471831	4.86352	0.294313	0.58747	0.0173743	4.86352	0.0399654	0.841548	0.0148271	-0.0327399	0.60453	0.850064
Blcap	0.827538	3.08556	45.4078	1.59994e-11	0.03949	3.08556	0.101545	0.749984	-0.283258	-0.00917923	0	0.762702
Blmh	0.00844227	6.09586	0.0273042	0.868755	0.0493955	6.09586	0.934449	0.33371	-0.00301305	0.0265963	0.873485	0.356601
Bloc1s1	-0.638245	4.61804	68.8691	1.05218e-16	-0.124997	4.61804	2.63685	0.10441	0.211618	-0.0507711	0	0.120887
Bloc1s5	-0.135096	5.67291	4.88551	0.027083	-0.0305238	5.67291	0.24941	0.617491	0.0457884	0.00161055	0.0340565	0.634668
Bloc1s6	-0.284209	6.52454	14.1932	0.000164965	-0.000252115	6.52454	1.07543e-05	0.997383	0.0936803	0.0218655	0.000275499	0.997456
Blvra	-0.0205843	4.2668	0.0484984	0.825697	-0.025005	4.2668	0.0712771	0.789486	0.0155107	0.00632655	0.832521	0.800867
Blzf1	-0.156123	4.26967	3.27453	0.0703629	-0.0858687	4.26967	0.991155	0.31946	0.0476144	0.0179724	0.0834559	0.342482
Bmf	-0.37664	5.69507	21.9056	2.86396e-06	0.0266562	5.69507	0.109868	0.740294	0.125951	-0.0172921	4.05145e-06	0.753011
Bmp5	0.169116	4.49911	5.0887	0.0240822	0.0381102	4.49911	0.258362	0.611248	-0.0582662	-0.0332304	0.0303656	0.628599
Bmp8b	0.130505	2.38556	0.518027	0.471684	-0.255375	2.38556	1.99635	0.157678	-0.0567267	0.010181	0.49322	0.178483
Bmpr2	0.0981072	4.98778	1.58941	0.20741	0.0147393	4.98778	0.035932	0.849656	-0.0341773	-0.0238699	0.228389	0.857867
Bnip1	0.349605	5.4424	39.3044	3.6263e-10	-0.0781018	5.4424	1.96083	0.161425	-0.120535	-0.012047	0	0.182631
Bnip2	0.342806	4.72885	22.3514	2.27052e-06	-0.0148935	4.72885	0.0422085	0.837223	-0.116457	-0.00831659	4.05145e-06	0.84611
Bnip3	-0.0717956	7.62892	4.05873	0.0439436	0.0450041	7.62892	1.59496	0.206618	0.0248396	0.00761649	0.0539046	0.228895
Bod1	0.195609	5.31889	7.97811	0.00473464	0.0909283	5.31889	1.72446	0.18912	-0.0670175	0.055915	0.0065512	0.211587
Bok	-0.0678099	3.39162	0.232699	0.62953	0.0168108	3.39162	0.014319	0.904751	0.0207736	0.00261534	0.644898	0.909608
Bola3	-0.298782	4.65787	21.1211	4.31163e-06	0.0346871	4.65787	0.284546	0.593737	0.103438	0.00170839	4.05145e-06	0.61162
Bop1	0.178016	3.82956	1.8733	0.171098	-0.103135	3.82956	0.629426	0.427566	-0.0632492	0.047258	0.19041	0.450044
Bpnt1	0.6973	8.23822	464.954	4.01726e-103	-0.0107939	8.23822	0.112024	0.737852	-0.236654	-0.0161918	0	0.750742
Bptf	-0.00377119	3.497	0.000613317	0.980242	-0.161543	3.497	1.12618	0.288592	0.00158933	-0.133962	0.981217	0.311204
Brap	-0.20701	6.23142	21.682	3.2179e-06	-0.0446343	6.23142	1.00798	0.315388	0.0698135	-0.036721	4.05145e-06	0.338503
Brd2	-0.197399	6.58745	16.2197	5.64057e-05	0.0248922	6.58745	0.257874	0.611585	0.0670716	0.0067061	0.000121544	0.628952
Brd4	0.0919684	5.05008	1.48915	0.222349	0.129529	5.05008	2.95561	0.0855801	-0.0315164	0.0328953	0.24397	0.100452
Brd8	-0.0233034	4.53985	0.0780436	0.779966	0.0868143	4.53985	1.08336	0.297948	0.00719126	-0.0315545	0.788684	0.320826
Brd9	0.0901794	5.28904	1.5662	0.21076	-0.014722	5.28904	0.0416958	0.838201	-0.0311516	0.0176374	0.23182	0.847025
Bre	0.0187411	4.18534	0.0465451	0.829188	-0.0673817	4.18534	0.60257	0.437599	-0.00520397	-0.0441374	0.835681	0.460225
Brf1	0.312088	4.53874	12.3579	0.000439124	-0.0501997	4.53874	0.319918	0.571657	-0.106367	-0.0436199	0.000741416	0.590706
Bri3bp	0.119631	5.39576	5.09727	0.0239635	0.0461969	5.39576	0.75992	0.383354	-0.0416507	-0.0231444	0.0302198	0.405692
Brox	-7.05601	2.49522	562.724	2.1477e-124	0.162444	2.49522	0.297795	0.585268	0.990217	-0.00688406	0	0.603663
Brpf3	0.549721	4.36778	52.2647	4.85016e-13	0.0209961	4.36778	0.0762258	0.782479	-0.195339	0.0289769	0	0.794393
Bsdc1	-0.0896076	7.53471	6.7696	0.00927238	0.0265672	7.53471	0.595129	0.440443	0.0300687	0.00718657	0.0124015	0.462984
Btaf1	-6.24691	4.13848	357.127	1.18895e-79	-0.216269	4.13848	0.437974	0.508102	0.968799	0.00713266	0	0.528508
Btbd1	-8.17383	3.42122	461.971	1.79057e-102	-0.81056	3.42122	4.49744	0.0339455	0.994872	0.00512821	0	0.0423012
Btbd10	0.0231617	3.47441	0.0355355	0.850478	-0.120995	3.47441	0.956596	0.328046	-0.0115916	0.044294	0.856003	0.351139
Btbd19	-0.552096	3.74225	30.0115	4.29501e-08	-0.0365887	3.74225	0.131641	0.716737	0.197865	-0.024598	0	0.730485
Btbd6	0.194231	2.7543	2.54597	0.110576	-0.0285704	2.7543	0.0550507	0.814497	-0.0692031	0.00225133	0.127102	0.824507
Btbd7	8.32976	5.47163	519.261	6.12946e-115	0.384231	5.47163	1.25428	0.262736	-0.992831	0.000943875	0	0.285316
Btc	-0.19888	3.84073	3.32767	0.0681233	-0.0225906	3.84073	0.0420254	0.837571	0.0687702	-0.0166272	0.0810696	0.84643
Btg2	0.282974	4.83777	17.1424	3.46791e-05	0.0257851	4.83777	0.142966	0.70535	-0.105186	-0.00333206	8.50805e-05	0.719506
Btnl9	6.41241	3.0699	623.237	1.47804e-137	-0.552525	3.0699	2.68977	0.100994	-0.980171	0.00173718	0	0.117148
BX537302.1	0.172915	3.08323	2.21973	0.136257	-0.124001	3.08323	1.14424	0.284757	-0.0492444	-0.0441613	0.1543	0.307599
Bzw1	0.391123	6.01591	55.4359	9.65557e-14	-0.00685688	6.01591	0.0170463	0.896122	-0.134441	-0.0115091	0	0.901542
Bzw2	-0.106413	4.86406	1.83045	0.176075	-0.0137449	4.86406	0.0304979	0.861365	0.0376569	0.000174209	0.19571	0.868615
C030006K11Rik	0.344367	4.89857	22.0176	2.70158e-06	0.0160023	4.89857	0.0473181	0.827798	-0.123199	-0.00442202	4.05145e-06	0.83718
C030034I22Rik	2.93165	3.16181	287.604	1.65395e-64	-0.0597542	3.16181	0.119711	0.729348	-0.76739	-0.0180752	0	0.742554
C130074G19Rik	-0.165015	9.59985	26.9857	2.04971e-07	-0.019553	9.59985	0.379099	0.538086	0.0566446	-0.00911726	4.05145e-06	0.557845
C1galt1	0.101639	5.01072	2.30562	0.128907	-0.0055763	5.01072	0.00694207	0.933598	-0.0351982	0.0304695	0.146703	0.936886
C1qbp	-0.176896	4.94166	4.28904	0.0383589	-0.012808	4.94166	0.0223627	0.881126	0.0598912	0.00137059	0.0474263	0.887382
C1ra	-0.275094	9.16909	92.3091	7.41424e-22	0.0166802	9.16909	0.33975	0.559974	0.0943971	0.0101309	0	0.579297
C1s	0.40081	10.5018	244.894	3.36966e-55	0.0129541	10.5018	0.256491	0.612541	-0.138522	0.0086459	0	0.629879
C2	0.100201	8.95754	13.4345	0.000247034	0.00470188	8.95754	0.0295863	0.863432	-0.0350126	0.00459631	0.000429454	0.87056
C2cd2l	0.188184	5.22021	6.20538	0.0127362	-0.0790838	5.22021	1.09585	0.295178	-0.0646076	-0.0798855	0.0168459	0.317954
C2cd5	-0.257466	3.96155	5.45206	0.0195453	0.189724	3.96155	2.96579	0.0850431	0.0844779	0.0258894	0.0249651	0.0998197
C330018D20Rik	0.360755	3.55424	13.2379	0.000274339	0.025967	3.55424	0.0684514	0.793605	-0.120127	0.023319	0.000478072	0.804712
C4a	1.05589	10.7565	14.4701	0.000142401	-0.455098	10.7565	2.69615	0.100591	-0.28228	0.0109545	0.000239036	0.116666
C4b	0.186457	12.5872	61.4848	4.4618e-15	-0.00898894	12.5872	0.142994	0.705323	-0.0649181	-0.00540627	0	0.719473
C530005A16Rik	0.445358	4.75897	49.346	2.14577e-12	-0.10102	4.75897	2.53515	0.111336	-0.153165	-0.029699	0	0.128273
C77080	-0.248505	7.6204	39.2845	3.66339e-10	0.0325901	7.6204	0.675987	0.410972	0.0853083	0.0104202	0	0.433562
C8a	0.851693	11.1733	727.95	2.50061e-160	-0.0074493	11.1733	0.0564157	0.812253	-0.287799	0.00806314	0	0.822563
C8b	-0.856295	9.39557	453.174	1.47019e-100	0.0368839	9.39557	0.849895	0.356582	0.288677	-0.00713859	0	0.379406
C920025E04Rik	-0.048097	7.16883	0.0289439	0.864909	-0.0584476	7.16883	0.0423863	0.836885	0.0142382	-0.0184014	0.869839	0.84581
Caap1	-0.206738	2.52032	2.26743	0.132119	0.104887	2.52032	0.585143	0.444303	0.0745653	0.0783566	0.150058	0.466586
Cab39	-0.0620587	5.8846	1.0093	0.31507	-0.02703	5.8846	0.191531	0.661646	0.0190984	0.0372039	0.338199	0.677824
Cab39l	0.366815	6.72899	74.261	6.84437e-18	-0.0107107	6.72899	0.0633931	0.801211	-0.126187	0.0285055	0	0.811826
Cacfd1	0.922264	6.91826	143.205	5.30102e-33	0.0692273	6.91826	0.816883	0.366093	-0.3039	0.010757	0	0.388656
Cacul1	3.51843	4.11768	665.579	9.14043e-147	-0.176944	4.11768	1.61602	0.203648	-0.831252	-0.00733232	0	0.225974
Cacybp	-0.0536433	2.86245	0.164551	0.685	-0.0844611	2.86245	0.406482	0.523761	0.0210512	-0.00195607	0.698495	0.544017
Cadm1	-0.223983	5.24195	11.6733	0.00063405	-0.0289184	5.24195	0.194666	0.659062	0.0786812	0.000812491	0.00101286	0.675442
Cadps2	-0.430523	5.17374	44.3866	2.69525e-11	0.145827	5.17374	5.09343	0.0240166	0.146516	0.0273858	0	0.0308721
Calcrl	1.20425	3.33658	40.8252	1.66473e-10	-0.0565976	3.33658	0.090342	0.763743	-0.371829	-0.063894	0	0.7764
Cald1	0.049302	6.34999	0.806937	0.369027	-0.0667423	6.34999	1.47843	0.22402	-0.0184665	-0.00917552	0.391711	0.246308
Calm1	0.336075	4.69986	26.6568	2.42999e-07	-0.11085	4.69986	2.89752	0.0887162	-0.119278	-0.0321266	4.05145e-06	0.103729
Calr	3.53e-05	10.0245	1.97974e-06	0.998877	-0.02615	10.0245	1.09079	0.296296	-0.000170824	-0.0153954	0.999092	0.319121
Camk1	0.129482	4.21891	1.61436	0.20388	-0.101102	4.21891	0.98614	0.320688	-0.039062	0.0098886	0.224807	0.34377
Camk2b	4.61533	2.56394	188.997	5.26314e-43	0.0734646	2.56394	0.0579526	0.809762	-0.910384	0.00114008	0	0.82012
Camk2d	-0.227827	5.23934	10.8105	0.00100925	-0.0384873	5.23934	0.308591	0.578546	0.0773058	0.00439654	0.00158007	0.597115
Camk2g	-0.197971	2.4761	1.73058	0.188337	-0.271563	2.4761	3.26166	0.0709175	0.0676759	0.0037817	0.208654	0.0841608
Camk2n1	-1.41905	4.7542	221.68	3.89071e-50	0.0740635	4.7542	0.607432	0.435756	0.452476	0.0200756	0	0.458353
Camsap2	-0.020694	5.25599	0.0233356	0.878588	-0.141776	5.25599	1.09411	0.295562	0.00741623	-0.0837689	0.88312	0.318306
Camta2	-0.379735	5.41764	32.5781	1.14497e-08	-0.0319743	5.41764	0.23147	0.630436	0.131983	-0.0240668	0	0.647414
Cant1	-0.209166	3.94733	3.7533	0.0527033	0.0760979	3.94733	0.49758	0.480566	0.074052	0.0237027	0.0639076	0.502028
Canx	0.0916603	8.95763	8.91113	0.00283438	0.0144709	8.95763	0.222152	0.637405	-0.0319187	-0.00641515	0.00409197	0.654208
Capn2	0.386356	6.81329	77.5101	1.32048e-18	-0.0115362	6.81329	0.0691376	0.792597	-0.132534	-0.0184547	0	0.803889
Capn3	0.560513	4.24604	45.7205	1.36388e-11	-0.090106	4.24604	1.17861	0.277639	-0.193943	0.00718537	0	0.300375
Capns1	-1.11573	8.56463	782.386	3.64453e-172	-0.0834647	8.56463	4.45585	0.0347818	0.366138	-0.0324758	0	0.0432452
Caprin1	0.101134	4.30232	1.85367	0.173357	0.113142	4.30232	2.31888	0.127812	-0.038825	-0.00311388	0.192898	0.146306
Car1	1.58677	4.3807	196.623	1.13967e-44	0.090924	4.3807	0.639894	0.423749	-0.49122	-0.0218082	0	0.446308
Car2	-1.1553	3.1153	54.0755	1.92934e-13	-0.0863907	3.1153	0.295497	0.586719	0.379255	0.019633	0	0.605081
Car3	0.184802	12.7347	6.38352	0.0115185	-0.0933783	12.7347	1.63066	0.201612	-0.0646803	0.0149308	0.0153064	0.223887
Car5a	-1.2103	7.91616	898.012	2.65397e-197	0.00896983	7.91616	0.0499609	0.823131	0.395571	-0.00234608	0	0.832926
Car8	0.196681	7.6784	28.2031	1.09232e-07	-0.0246892	7.6784	0.444544	0.504938	-0.0678879	-0.0260848	0	0.525563
Carkd	-0.452141	7.49558	164.071	1.45981e-37	-0.000343102	7.49558	9.22792e-05	0.992335	0.154928	0.00637426	0	0.992886
Cars	0.155274	6.37397	6.79323	0.00915043	0.0304077	6.37397	0.260643	0.609679	-0.0522026	-0.0275764	0.0122232	0.627064
Cars2	0.440468	5.55863	28.329	1.02351e-07	0.0985857	5.55863	1.42144	0.233167	-0.149153	0.00863996	0	0.25529
Casc4	-0.656679	3.1407	18.7434	1.49544e-05	0.035149	3.1407	0.0549943	0.81459	0.218633	0.0878744	4.05145e-05	0.8246
Casd1	1.55276	3.83264	174.305	8.49186e-40	0.0403676	3.83264	0.11866	0.730492	-0.484594	0.0457205	0	0.743733
Casp3	-0.0100269	2.82083	0.00272528	0.958366	-0.103578	2.82083	0.314515	0.574923	-0.00244807	-0.0331998	0.960693	0.593655
Casp7	0.287587	6.25086	32.7573	1.04411e-08	-0.0809796	6.25086	2.59796	0.107002	-0.0993644	-0.0257819	0	0.123768
Casp8	0.0642703	6.47987	1.82154	0.17713	-0.0158225	6.47987	0.110418	0.739669	-0.0219307	-0.0069705	0.196759	0.752472
Casp8ap2	0.169453	2.97973	1.05479	0.304407	0.305243	2.97973	3.44589	0.0634094	-0.0534661	0.0251277	0.327722	0.0756568
Casp9	-8.30646	3.99101	1381.34	2.38888e-302	0.168783	3.99101	0.225019	0.635242	0.996391	-0.000855231	0	0.652146
Cast	2.7762	3.29851	180.544	3.68713e-41	-0.298155	3.29851	2.19156	0.138768	-0.714382	0.0460375	0	0.158517
Cat	0.12132	12.6597	27.4582	1.60529e-07	0.00134904	12.6597	0.0033958	0.953531	-0.0426058	0.00406979	0	0.956017
Catsper2	0.226401	3.22647	2.48879	0.11466	0.219495	3.22647	2.343	0.125847	-0.0756623	0.020631	0.131555	0.144183
Cbfa2t2	-4.1613	5.15821	58.1907	2.37899e-14	-0.0618184	5.15821	0.0126419	0.910477	0.756232	0.00153671	0	0.914705
Cbfa2t3	0.238264	2.85728	2.5367	0.111227	-0.308863	2.85728	4.26481	0.0389095	-0.076773	-0.017085	0.127819	0.0480138
Cbl	0.208668	3.60273	3.38852	0.0656519	-0.0445235	3.60273	0.153983	0.694758	-0.0671359	0.0354364	0.0782579	0.709442
Cbll1	-0.0679711	3.61476	0.43106	0.511469	-0.0734836	3.61476	0.502804	0.478271	0.0232961	0.0298618	0.531786	0.499633
Cbr1	1.25622	6.30488	342.815	1.55542e-76	-0.0128761	6.30488	0.0357303	0.850074	-0.405466	-0.0576733	0	0.858248
Cbs	-0.38578	9.55656	185.558	2.96465e-42	-0.0208757	9.55656	0.544588	0.460537	0.132266	-0.00818667	0	0.482273
Cbwd1	-0.0754989	3.86076	0.357405	0.549951	0.0921812	3.86076	0.533546	0.46512	0.0285935	-0.0440674	0.568694	0.486774
Cbx1	-0.280361	4.46518	9.98484	0.00157835	0.106538	4.46518	1.44286	0.229677	0.0940893	0.0411097	0.00241872	0.251863
Cc2d1a	-0.119739	5.13322	2.7026	0.100185	-0.00947531	5.13322	0.0169676	0.896361	0.0404475	0.0101925	0.115997	0.901764
Ccar1	0.284641	3.13847	4.64657	0.0311157	-0.289424	3.13847	4.80304	0.0284096	-0.100372	-0.0908121	0.0389466	0.0360741
Ccdc111	0.180007	3.14695	1.84492	0.174376	-0.11593	3.14695	0.761534	0.382849	-0.0686837	-0.0408261	0.193927	0.405153
Ccdc117	0.88152	4.79018	159.025	1.84745e-36	-0.0741407	4.79018	1.12003	0.289912	-0.296949	-0.0383498	0	0.312444
Ccdc12	-1.83848	2.97554	154.784	1.56126e-35	-0.0119471	2.97554	0.00403666	0.949341	0.552279	-0.0014843	0	0.952088
Ccdc126	0.233959	2.70182	1.94535	0.163089	-0.174112	2.70182	1.07644	0.299495	-0.0779279	-0.0273045	0.181955	0.32252
Ccdc127	-2.17526	5.28682	1072.05	3.92504e-235	0.0331989	5.28682	0.242129	0.622673	0.63846	-0.0021697	0	0.639708
Ccdc130	-0.279677	2.50356	3.32956	0.0680451	-0.177554	2.50356	1.3371	0.247547	0.109192	0.109682	0.0809602	0.269644
Ccdc134	0.169244	3.47286	2.38723	0.122331	0.0736955	3.47286	0.451697	0.50153	-0.0577808	0.0105126	0.13967	0.52252
Ccdc141	1.88913	5.57222	804.404	5.95103e-177	0.0679762	5.57222	1.04151	0.30747	-0.576163	0.00551352	0	0.330708
Ccdc148	-0.839983	3.3131	22.9406	1.67086e-06	-0.0542846	3.3131	0.094129	0.758992	0.266276	0.0294688	4.05145e-06	0.771697
Ccdc163	-0.814751	3.71489	41.1775	1.39011e-10	-0.0237565	3.71489	0.0353251	0.850916	0.265152	-0.0450782	0	0.858985
Ccdc171	0.443494	3.65243	6.22857	0.0125706	0.0426016	3.65243	0.0577931	0.810019	-0.135351	-0.110868	0.0166474	0.82033
Ccdc24	0.140003	2.2098	0.739883	0.389698	-0.0884609	2.2098	0.294594	0.587292	-0.0533765	-0.0915665	0.412296	0.60555
Ccdc28a	0.43765	6.03737	58.5543	1.97758e-14	0.106684	6.03737	3.4835	0.0619836	-0.147622	0.0232807	0	0.0740849
Ccdc28b	-0.256608	4.42331	5.09405	0.024008	-0.112599	4.42331	0.979136	0.322412	0.0881891	-0.00421182	0.0302725	0.345399
Ccdc32	-0.223537	3.6124	4.87432	0.0272591	0.175212	3.6124	2.99522	0.0835104	0.0776407	0.0553097	0.0342672	0.0982072
Ccdc41	-0.41941	4.3198	15.8766	6.76099e-05	-0.00463927	4.3198	0.00191015	0.965139	0.137873	0.0376708	0.000129647	0.966831
Ccdc43	-0.0779573	2.97787	0.465708	0.494968	-0.118261	2.97787	1.07089	0.300746	0.0163797	-0.0176995	0.516034	0.323845
Ccdc47	-0.261065	2.92326	2.97942	0.0843293	-0.134191	2.92326	0.779349	0.37734	0.0979708	0.0648038	0.0988149	0.399789
Ccdc50	-0.285639	7.33875	51.4549	7.326e-13	0.0470404	7.33875	1.39622	0.237357	0.0986959	0.0165887	0	0.259439
Ccdc55	0.151498	4.4175	2.67559	0.101898	-0.207436	4.4175	5.0167	0.0251039	-0.049925	-0.0179346	0.117893	0.0320754
Ccdc58	0.441791	5.1702	11.8717	0.000569937	-0.00742901	5.1702	0.00344779	0.953177	-0.145944	0.024869	0.000927783	0.955693
Ccdc84	0.158259	4.10497	2.74838	0.0973531	0.0147977	4.10497	0.0241433	0.876521	-0.0559968	-0.011564	0.112744	0.882913
Ccdc85c	0.336074	4.27101	12.1575	0.0004889	0.190499	4.27101	3.90878	0.0480345	-0.109726	0.0286763	0.000830548	0.0583369
Ccdc88a	-0.0946523	3.75438	0.597748	0.439439	-0.00995874	3.75438	0.00665744	0.93497	0.0371914	-0.0542324	0.461298	0.938268
Ccdc9	-0.245026	4.46821	9.22794	0.0023835	-0.0390166	4.46821	0.234297	0.628356	0.0826888	0.0129099	0.00350856	0.645263
Ccdc90b	-0.0605501	3.32803	0.164255	0.685269	-0.0626196	3.32803	0.174862	0.675826	0.0200239	-0.0694149	0.698758	0.691227
Ccdc91	-0.102639	7.37835	8.5339	0.00348592	-0.0243353	7.37835	0.479727	0.488546	0.0343699	0.008985	0.00495898	0.509798
Ccdc93	-0.481663	6.21049	73.6525	9.3154e-18	0.0417906	6.21049	0.55533	0.456148	0.164489	-0.0150902	0	0.47795
Cchcr1	0.926983	3.98909	8.5336	0.00348649	0.417222	3.98909	1.72405	0.189172	-0.256383	0.0419389	0.00495898	0.211632
Ccl9	-0.807284	6.81404	402.797	1.35564e-89	-0.0498367	6.81404	1.53673	0.215106	0.272982	-0.00814139	0	0.237435
Ccm2l	-0.852854	3.35832	37.7046	8.23122e-10	0.0707807	3.35832	0.26129	0.609235	0.283665	0.0653237	0	0.626626
Ccna2	-0.304878	3.50582	10.0057	0.00156055	-0.0420269	3.50582	0.189648	0.66321	0.108807	-0.046745	0.00239036	0.679295
Ccnd1	0.0843351	6.41489	3.20033	0.0736236	-0.058889	6.41489	1.56025	0.211629	-0.0265414	-0.0223663	0.0872805	0.233911
Ccnd2	-0.113241	4.29011	1.3658	0.242535	0.14448	4.29011	2.22325	0.135947	0.0406651	-0.0151103	0.264868	0.155377
Ccndbp1	0.31693	6.28411	37.5176	9.05904e-10	0.0310266	6.28411	0.359728	0.548657	-0.10919	0.0312086	0	0.567965
Ccng2	-0.103264	2.98212	0.849213	0.356775	-0.0496799	2.98212	0.196705	0.657394	0.0350481	-0.0407542	0.380152	0.673842
Ccnh	0.123443	3.48543	1.63195	0.201433	-0.22043	3.48543	5.20353	0.0225411	-0.0465937	-0.0241024	0.222315	0.0290935
Ccni	-1.42435	7.03431	687.712	1.40557e-151	0.0195496	7.03431	0.131902	0.716468	0.454733	0.00472403	0	0.73023
Ccnl2	0.0903937	8.27189	13.1233	0.00029164	-0.00936915	8.27189	0.140992	0.707297	-0.032011	-0.0005091	0.000510483	0.721487
Ccnt2	0.0856413	5.18675	3.00789	0.0828599	-0.0258001	5.18675	0.272944	0.601364	-0.0316739	-0.0112896	0.097166	0.619127
Ccnyl1	-4.6462	2.90788	289.328	6.96614e-65	0.139664	2.90788	0.291149	0.589485	0.915033	0.00127209	0	0.607629
Ccr2	0.380349	3.95232	17.7526	2.51568e-05	0.070479	3.95232	0.60717	0.435855	-0.12659	-0.0311486	7.29262e-05	0.458471
Ccr3	0.843502	2.829	35.6872	2.31678e-09	-0.0210353	2.829	0.0180255	0.893198	-0.287786	0.0256648	0	0.898888
Ccr5	-0.0868599	5.10863	1.86797	0.171708	-0.000415708	5.10863	4.23743e-05	0.994806	0.0273309	-0.00831818	0.191107	0.995118
Ccrl1	-0.372136	7.11712	130.182	3.73872e-30	0.035686	7.11712	1.19708	0.273905	0.12893	0.0173889	0	0.296441
Ccrn4l	-1.3019	6.30253	158.903	1.96447e-36	0.0519928	6.30253	0.259485	0.610474	0.408585	0.00695675	0	0.627744
Cct2	0.178297	8.53742	32.9225	9.59087e-09	-0.0246928	8.53742	0.631707	0.42673	-0.0622441	-0.00250537	0	0.449181
Cct4	0.0715202	6.63667	2.1961	0.138361	0.0298202	6.63667	0.381757	0.536665	-0.0254938	-0.000984288	0.156281	0.556423
Cct5	-0.144968	8.3541	15.775	7.13378e-05	0.0677279	8.3541	3.44382	0.0634886	0.0496912	0.0336274	0.000137749	0.0757541
Ccz1	-0.0409673	5.04278	0.258097	0.611431	0.0636082	5.04278	0.622413	0.430152	0.0132766	0.0157377	0.627586	0.452661
Cd2ap	-0.0285841	6.83595	0.449583	0.502533	0.0199137	6.83595	0.218232	0.640391	0.00928988	0.00376551	0.523221	0.656988
Cd320	0.151075	3.36757	1.34459	0.246225	-0.402421	3.36757	9.55497	0.00199409	-0.0544525	-0.0962207	0.268498	0.00271042
Cd47	-0.127827	6.89967	6.97586	0.00826167	-0.0918787	6.89967	3.60469	0.0576167	0.0424265	-0.00409329	0.0111253	0.0692353
Cd55	-0.172658	4.12123	4.18118	0.0408752	-0.0473127	4.12123	0.314191	0.57512	0.058401	-0.0193372	0.0503636	0.593858
Cd59a	0.433478	7.67315	122.606	1.70064e-28	0.0196652	7.67315	0.252749	0.615146	-0.14902	-0.00676043	0	0.632318
Cd59b	1.72966	3.42928	14.5599	0.000135771	-0.0113864	3.42928	0.000254421	0.987274	-0.411467	-0.138188	0.000230933	0.987813
Cd68	-0.0121054	4.97354	0.0296157	0.863365	0.0318345	4.97354	0.204313	0.651262	0.00447303	-0.0161212	0.868356	0.667748
Cd72	-0.266378	4.93966	14.6443	0.00012983	-0.0403331	4.93966	0.335887	0.562213	0.0932485	-0.0138569	0.000218778	0.581448
Cd74	-0.130239	8.09156	10.4658	0.00121605	0.0500608	8.09156	1.54686	0.2136	0.0441259	-0.0120845	0.00192039	0.235912
Cd82	-0.235364	7.60701	48.2827	3.68995e-12	0.0303095	7.60701	0.800996	0.370796	0.0809765	0.00808385	0	0.393226
Cd86	-0.144058	2.41144	0.592772	0.441349	0.0581279	2.41144	0.0959245	0.756776	0.0417539	-0.024041	0.46315	0.769472
Cd97	-0.097425	6.81492	4.78926	0.0286378	0.013622	6.81492	0.0936095	0.759638	0.0338769	-0.00609369	0.0359202	0.772345
Cdan1	-0.415868	5.08508	45.5225	1.50898e-11	0.0150778	5.08508	0.0598352	0.806757	0.141824	0.0121855	0	0.817134
Cdc14b	0.125854	4.12778	1.53124	0.215926	-0.130214	4.12778	1.63596	0.200881	-0.0497321	-0.054779	0.237294	0.223191
Cdc16	0.23048	6.16725	13.7194	0.000212248	0.00163164	6.16725	0.00068234	0.97916	-0.0788372	-0.0168604	0.000380837	0.980176
Cdc23	-0.0299015	4.10392	0.127505	0.721033	-0.101764	4.10392	1.47946	0.223859	0.0115291	-0.004772	0.732847	0.246158
Cdc27	0.161143	5.11054	5.77505	0.0162553	-0.0210505	5.11054	0.098757	0.753326	-0.0543443	0.00169304	0.0212418	0.765984
Cdc37	0.0200775	5.00436	0.0966193	0.755925	-0.0190564	5.00436	0.0870284	0.767989	-0.0074865	0.00235859	0.76598	0.780488
Cdc42	0.073101	8.22112	5.24388	0.0220241	-0.00580962	8.22112	0.0331297	0.85557	-0.025457	-0.0192696	0.0279145	0.863296
Cdc42bpb	0.188515	6.88832	20.114	7.29605e-06	-0.0123567	6.88832	0.0864647	0.768721	-0.0656733	0.0166003	8.10291e-06	0.781169
Cdc42ep2	-0.161112	2.85596	1.17874	0.277613	-0.077619	2.85596	0.272268	0.601815	0.0609486	0.101457	0.300743	0.619564
Cdc42ep5	-0.629636	2.60585	16.8246	4.0999e-05	-0.237443	2.60585	2.41559	0.120133	0.190617	0.0257302	8.9132e-05	0.137944
Cdc42se2	7.08762	3.38119	113.198	1.95243e-26	-0.53918	3.38119	1.10092	0.294064	-0.945551	-0.0162792	0	0.316747
Cdc5l	-0.564463	4.79111	54.8015	1.33337e-13	-0.0806201	4.79111	1.11777	0.290399	0.192622	-0.0123604	0	0.313007
Cdc73	0.141638	4.37942	2.74578	0.0975113	0.00956975	4.37942	0.0125549	0.910785	-0.0435015	-0.00963537	0.11295	0.915049
Cdca4	0.0821428	2.96614	0.531671	0.465905	-0.00552499	2.96614	0.00236377	0.961223	-0.0247028	-0.0191488	0.487289	0.963225
Cdca7	-0.155779	2.20893	0.478904	0.488919	-0.312216	2.20893	1.93652	0.164047	0.0488134	-0.0133817	0.510179	0.185386
Cdcp1	-1.98999	2.8337	145.512	1.6601e-33	-0.291471	2.8337	3.12872	0.0769242	0.58529	-0.0609805	0	0.0908944
Cdh2	0.00988618	6.22037	0.0338968	0.853927	-0.0208876	6.22037	0.151278	0.697317	-0.00423516	-0.00212848	0.859358	0.712002
Cdk10	-0.155147	4.7625	3.80535	0.0510891	0.0430446	4.7625	0.293388	0.588058	0.0539482	0.0281409	0.0621331	0.606292
Cdk11b	0.453307	3.03158	7.0669	0.0078521	0.21482	3.03158	1.58698	0.207759	-0.148013	0.0329498	0.0106229	0.230037
Cdk14	0.400813	3.03453	4.74801	0.0293321	0.172174	3.03453	0.874748	0.349644	-0.128322	0.00113584	0.0367953	0.372665
Cdk17	-0.115519	6.11701	5.70065	0.0169586	0.00493892	6.11701	0.0104333	0.918643	0.0397553	-0.00103513	0.0219589	0.922289
Cdk18	0.0185096	5.77333	0.0926768	0.760801	0.0325687	5.77333	0.286669	0.592363	-0.00746107	0.0230343	0.770262	0.610327
Cdk2	0.197234	3.36799	2.63098	0.104797	0.134969	3.36799	1.23584	0.266274	-0.0663125	0.0842335	0.120891	0.288966
Cdk2ap1	4.26495	4.22072	1223.93	3.83356e-268	0.137331	4.22072	0.924986	0.336169	-0.903463	0.00735085	0	0.359015
Cdk4	5.86077	4.99028	2207.62	0	-0.159194	4.99028	0.946755	0.330547	-0.967676	0.00297738	0	0.353587
Cdk5rap3	-0.179577	7.68053	23.3422	1.35593e-06	-0.0305096	7.68053	0.673985	0.411666	0.0603405	0.00193141	4.05145e-06	0.43432
Cdk6	6.82408	4.05586	609.267	1.615e-134	0.550761	4.05586	2.96669	0.0849955	-0.980239	0.00224785	0	0.0997751
Cdk8	-3.1349	5.30695	1229.29	2.62451e-269	0.0396685	5.30695	0.193873	0.659713	0.79186	0.0170066	0	0.676034
Cdkn1a	-0.727208	3.00004	29.7314	4.96241e-08	0.0704878	3.00004	0.287921	0.591556	0.267729	0.080268	0	0.609618
Cdkn1b	-0.129607	5.7027	6.02688	0.0140896	-0.0407351	5.7027	0.595561	0.440277	0.0421086	0.00608113	0.0185151	0.46283
Cdkn2aipnl	-0.141923	4.4107	4.40614	0.0358099	-0.0869823	4.4107	1.6547	0.19832	0.0496779	-0.00435953	0.0443958	0.220594
Cdt1	0.225958	3.60331	3.38716	0.0657061	0.0889429	3.60331	0.524947	0.468739	-0.0776863	0.00613651	0.0783065	0.490453
Cdv3	0.834971	7.55207	549.566	1.56447e-121	-0.0501038	7.55207	1.98856	0.158491	-0.281329	-0.021149	0	0.179398
Cdyl	-0.134138	2.68337	0.607053	0.4359	-0.106454	2.68337	0.383163	0.535915	0.055532	0.0687318	0.457753	0.555718
Cdyl2	0.0410035	3.11658	0.0804547	0.776682	-0.110434	3.11658	0.585252	0.444261	-0.0141719	-0.0183719	0.785532	0.466545
Ceacam1	-0.106389	8.61305	11.5464	0.000678795	0.0093381	8.61305	0.0889525	0.765513	0.0367431	0.00427942	0.00108174	0.778017
Ceacam2	-1.73108	7.51853	696.264	1.94175e-153	0.0425564	7.51853	0.437543	0.508311	0.532334	-0.0114783	0	0.528723
Cebpa	0.708943	6.24283	287.238	1.98769e-64	0.00227549	6.24283	0.00296909	0.956545	-0.241934	0.00160169	0	0.958809
Cebpg	0.188986	7.30559	30.9288	2.67677e-08	0.038068	7.30559	1.25503	0.262593	-0.0655347	0.00896791	0	0.285178
Cecr2	-0.273445	4.90662	16.6062	4.59998e-05	0.00322811	4.90662	0.00226372	0.962052	0.0952097	0.0116829	0.000105338	0.964104
Cecr5	-0.141999	5.70955	3.43916	0.063668	0.0911949	5.70955	1.41879	0.233603	0.0489167	-0.0114043	0.076143	0.255736
Cela1	-1.77647	5.29407	455.269	5.14515e-101	-0.11942	5.29407	2.07459	0.149771	0.542403	-0.0211701	0	0.170193
Celf2	-0.020943	3.74874	0.0178257	0.893788	-0.0965384	3.74874	0.373536	0.541083	0.0106218	0.034985	0.898175	0.560741
Celsr1	0.138559	4.90388	3.21067	0.0731593	-0.0678215	4.90388	0.769411	0.380399	-0.0486515	-0.00101553	0.0867659	0.402824
Cenpc1	-0.0107482	3.51558	0.00510263	0.943053	0.0817361	3.51558	0.296461	0.58611	0.0017903	0.0719468	0.94618	0.60453
Cenpo	-0.669091	4.16328	49.6707	1.81841e-12	0.137199	4.16328	2.09047	0.14822	0.221978	0.00689565	0	0.16854
Cenpq	0.290592	4.8873	14.3329	0.000153167	-0.00839434	4.8873	0.0120966	0.912421	-0.100549	-0.00823453	0.000255242	0.91654
Cep120	0.814612	2.78633	23.382	1.32819e-06	-0.30697	2.78633	3.35341	0.0670659	-0.255832	0.0362176	4.05145e-06	0.0799392
Cep135	0.189574	3.00625	2.30103	0.129288	-0.0349161	3.00625	0.0778872	0.780181	-0.0652041	-0.0188189	0.147048	0.792363
Cep170	-0.164839	3.78176	2.94479	0.0861547	-0.123727	3.78176	1.65863	0.197788	0.0528236	-0.00972695	0.100683	0.220014
Cep170b	-0.324345	6.02842	43.9884	3.30336e-11	0.0165366	6.02842	0.114258	0.735347	0.109944	0.0153134	0	0.748356
Cep19	-0.329569	2.55536	4.4367	0.0351743	-0.232571	2.55536	2.20225	0.13781	0.10571	-0.0421755	0.0436058	0.157354
Cep192	-0.778892	4.72071	69.496	7.65698e-17	0.00377044	4.72071	0.00161982	0.967896	0.257728	0.022583	0	0.969452
Cep250	-0.434102	5.20857	32.5233	1.1777e-08	-0.0189694	5.20857	0.0624105	0.802726	0.147072	-0.0271206	0	0.813508
Cep290	-0.234797	4.29619	8.00029	0.00467699	-0.0106037	4.29619	0.0164061	0.898081	0.0774839	-0.0311761	0.00649448	0.903361
Cep44	0.314094	4.72055	14.0736	0.00017579	-0.105867	4.72055	1.59823	0.206154	-0.110332	-0.0497061	0.000299808	0.22849
Cep63	0.372462	4.1299	9.26581	0.00233471	-0.0316028	4.1299	0.0674962	0.795018	-0.124483	0.0485665	0.00343968	0.806037
Cep68	-0.144677	5.03378	5.13514	0.0234462	-0.133219	5.03378	4.35415	0.0369189	0.0469013	-0.0456141	0.0296445	0.0456032
Cep70	-0.812567	3.30033	31.1406	2.39995e-08	-0.246941	3.30033	2.89239	0.0889989	0.256537	-0.127445	0	0.104066
Cep76	0.23828	3.64872	3.19819	0.0737198	-0.06561	3.64872	0.243007	0.622043	-0.0809486	-0.0539439	0.0873939	0.639109
Cep85	-0.515641	3.73066	14.5695	0.000135086	-0.248039	3.73066	3.3779	0.0660763	0.170912	-0.0550174	0.000230933	0.0787846
Cep85l	-0.0774783	4.89079	0.909835	0.340158	0.00477809	4.89079	0.00348078	0.952954	0.024133	0.0349811	0.363671	0.955462
Cep97	0.30245	3.8277	7.89067	0.00496905	0.0982635	3.8277	0.83329	0.361323	-0.102879	-0.0487246	0.00687937	0.383968
Cerk	-0.039121	4.29663	0.0935567	0.759703	0.0153069	4.29663	0.0143908	0.904514	0.00803163	0.0213565	0.769221	0.909393
Cers5	0.0850416	2.83773	0.251884	0.615751	0.0773425	2.83773	0.210881	0.646078	-0.0141701	0.0281031	0.631545	0.662425
Ces1b	2.47316	5.73654	921.802	1.78813e-202	0.156246	5.73654	3.752	0.0527443	-0.692352	0.00802135	0	0.0638955
Ces1c	2.2096	2.7048	45.2203	1.76074e-11	0.263907	2.7048	0.600754	0.438291	-0.574459	0.0212246	0	0.460946
Ces2g	-7.94211	4.16874	1554.14	0	0.138184	4.16874	0.159299	0.689802	0.994434	-0.00280702	0	0.704738
Cetn3	-9.1414	5.20113	2852.67	0	0.245146	5.20113	0.526659	0.468015	0.997196	-0.000783418	0	0.489772
Cfb	-0.133078	12.111	28.653	8.6581e-08	-0.00528996	12.111	0.0452901	0.831471	0.0455311	0.00162045	0	0.840515
Cfdp1	0.114669	4.36034	2.25307	0.13335	0.0258152	4.36034	0.114167	0.735449	-0.0400288	-0.00820818	0.151293	0.748482
Cfh	-1.18186	9.69012	336.146	4.4082e-75	0.0748125	9.69012	1.38088	0.239952	0.38288	0.020744	0	0.262048
Cfhr2	-0.283195	6.74163	32.0919	1.47048e-08	-0.0203675	6.74163	0.166152	0.683554	0.0967893	0.00312348	0	0.698774
Cfl2	-0.0115134	6.27811	0.055172	0.814296	-0.00487668	6.27811	0.00987834	0.920829	0.00343367	-0.0057157	0.822206	0.9244
Cflar	-1.35978	3.20079	34.7653	3.71937e-09	0.200489	3.20079	0.738473	0.39015	0.414571	-0.0560791	0	0.41279
Cgn	4.32876	2.4326	111.288	5.11625e-26	-0.257066	2.4326	0.435817	0.509148	-0.871241	0.00461837	0	0.529525
Cgnl1	0.403184	8.18225	188.651	6.26296e-43	-0.0184267	8.18225	0.394519	0.529934	-0.13973	0.015401	0	0.549981
Cgrrf1	0.168259	4.82347	3.32726	0.0681404	-0.0553197	4.82347	0.360003	0.548505	-0.0622892	0.0162143	0.0810817	0.567868
Chac1	0.0835356	5.20985	0.98525	0.320906	-0.0581936	5.20985	0.48004	0.488404	-0.0252791	-0.0437163	0.344025	0.509616
Chad	0.9092	4.41906	57.4901	3.39684e-14	-0.121171	4.41906	1.02835	0.310546	-0.295878	-0.0690361	0	0.333686
Champ1	-0.0390044	4.68975	0.249789	0.617224	-0.0923441	4.68975	1.40018	0.236694	0.011619	-0.0122572	0.633019	0.258783
Chchd3	0.0785853	5.47909	1.68569	0.194171	0.0273075	5.47909	0.203477	0.651929	-0.025581	0.0110536	0.214784	0.668514
Chd1	-0.266012	6.19431	42.9218	5.69731e-11	0.0326573	6.19431	0.646203	0.421474	0.0919937	0.00334183	0	0.443926
Chd2	0.00610032	5.53289	0.00755002	0.930758	-0.095092	5.53289	1.82881	0.176268	-0.0057528	0.0125102	0.933978	0.198302
Chd3	0.229352	8.08044	42.327	7.7221e-11	-0.0590633	8.08044	2.80873	0.0937528	-0.0793011	-0.0120296	0	0.109211
Chd4	0.0159879	7.35522	0.133629	0.714699	-0.0111496	7.35522	0.0649766	0.798796	-0.0058529	0.00963048	0.726948	0.809776
Chd7	0.0107396	3.1553	0.00777737	0.929726	-0.122509	3.1553	1.0084	0.315285	-0.00572916	-0.0516578	0.933013	0.338365
Chd8	-0.0851852	5.19727	1.24128	0.265225	-0.13309	5.19727	3.02887	0.081795	0.0285337	-0.015519	0.287896	0.0963517
Chmp1a	-0.0709622	6.81241	3.11047	0.0777906	0.000600148	6.81241	0.000222567	0.988097	0.0251115	-0.0102742	0.0916925	0.988684
Chmp2a	-0.0433216	6.87953	0.929716	0.334937	0.0372748	6.87953	0.688344	0.406728	0.0149968	0.00330333	0.358404	0.429434
Chmp4b	-1.20857	6.39515	150.699	1.2192e-34	-0.0371652	6.39515	0.145306	0.703062	0.386129	0.00229581	0	0.71733
Chmp5	-0.10304	5.09491	1.68338	0.194476	0.0953165	5.09491	1.44039	0.230076	0.036714	0.0525719	0.215104	0.252248
Chn2	-0.337835	2.52824	5.79643	0.0160588	0.100065	2.52824	0.505046	0.477291	0.124008	-0.00603824	0.0210108	0.498653
Chp1	-0.757666	9.84873	899.149	1.50221e-197	0.00286021	9.84873	0.0129105	0.909536	0.256087	-1.08293e-05	0	0.913935
Chpf2	-0.030793	4.58094	0.136885	0.711398	0.0481156	4.58094	0.334829	0.562829	0.00941058	0.0475684	0.723748	0.58204
Chpt1	0.402311	8.62225	113.063	2.09023e-26	-0.058477	8.62225	2.39401	0.121801	-0.140356	-0.00513765	0	0.139714
Chrd	-0.140761	3.01382	1.01228	0.314358	-0.0262018	3.01382	0.0348551	0.8519	0.0443335	-0.035048	0.337535	0.859893
Chst2	0.197906	3.74755	4.08985	0.0431415	-0.205396	3.74755	4.40562	0.0358208	-0.0768197	0.0127524	0.0529849	0.0444161
Chtop	-0.118418	4.83062	3.66404	0.0555985	-0.0845045	4.83062	1.86558	0.171982	0.0382906	-0.000710856	0.0670556	0.193838
Chuk	-10.3111	6.46762	266.144	7.85776e-60	0.0466463	6.46762	0.00754127	0.930798	0.997198	-1.76872e-05	0	0.934144
Cidec	-1.19329	3.59096	4.14161	0.0418413	1.30379	3.59096	5.04481	0.0246999	0.242456	0.123034	0.0514737	0.0316297
Ckap4	0.450597	2.69784	8.61951	0.00332581	-0.0749922	2.69784	0.241415	0.623186	-0.155814	-0.00102409	0.00474425	0.640182
Clasp1	0.559837	4.55018	54.4951	1.55837e-13	-0.0644555	4.55018	0.721846	0.395539	-0.192495	-0.0334404	0	0.417794
Clasrp	0.0445026	2.40786	0.0424357	0.836792	-0.121429	2.40786	0.31941	0.571962	-0.0122279	-0.0835915	0.842739	0.590986
Clca1	-0.946826	5.47491	126.686	2.17582e-29	-0.00564141	5.47491	0.00450733	0.946473	0.313121	0.0358533	0	0.949495
Clcn2	0.270697	4.18922	7.49328	0.00619296	-0.0916146	4.18922	0.85789	0.35433	-0.0929586	-0.0149856	0.00840677	0.377284
Clcn3	-0.0238841	6.30944	0.173022	0.67744	0.0261169	6.30944	0.206953	0.649166	0.00832996	-0.018759	0.691154	0.665593
Clcn4-2	0.445904	5.97137	56.0588	7.03368e-14	0.0878418	5.97137	2.17832	0.139967	-0.152459	0.0533735	0	0.159939
Clcn7	-0.280069	6.87442	50.263	1.34458e-12	0.0455264	6.87442	1.32866	0.249043	0.0951848	-0.00362632	0	0.27116
Cldn1	-0.260836	6.51871	35.9481	2.02644e-09	0.00354463	6.51871	0.00665116	0.935001	0.0886921	0.00302604	0	0.938304
Cldn12	0.247294	8.86193	74.2954	6.72613e-18	-0.00246351	8.86193	0.0073827	0.931528	-0.0856937	-0.0031091	0	0.934885
Cldn14	8.28287	3.12896	895.112	1.13329e-196	0.135474	3.12896	1.12935	0.287915	-0.999111	-0.000888889	0	0.310544
Cldn25	0.672655	6.02629	148.837	3.11305e-34	0.0602692	6.02629	1.19661	0.274001	-0.228393	0.0222801	0	0.296514
Clec1a	0.0269166	3.40083	0.0528781	0.818129	-0.105307	3.40083	0.813128	0.367197	-0.00952771	-0.0583077	0.825686	0.389802
Clec1b	-0.160757	5.84577	8.95508	0.002767	-0.0087968	5.84577	0.026806	0.869947	0.0524636	-0.0197307	0.00404335	0.876678
Clec2d	1.08155	2.46885	41.9681	9.27741e-11	-0.0450537	2.46885	0.0697317	0.791728	-0.347719	0.0255504	0	0.803039
Clec4a2	0.470617	3.49127	11.0933	0.000866401	0.0474466	3.49127	0.113014	0.736738	-0.162315	0.0134086	0.00138155	0.749734
Clec4a3	0.406267	2.54033	6.6531	0.00989837	0.250118	2.54033	2.51799	0.112554	-0.13281	0.11179	0.0132726	0.129561
Clec7a	-0.907966	4.20112	89.8003	2.63449e-21	0.169079	4.20112	3.11413	0.077616	0.298824	0.0311802	0	0.0916601
Clec9a	-0.109623	4.7517	2.49687	0.114073	-0.0696839	4.7517	1.00915	0.315107	0.0346544	-0.0298144	0.130951	0.338171
Clic1	-0.0965858	4.67702	0.969422	0.324824	-0.103547	4.67702	1.11477	0.291048	0.0332451	0.00778198	0.348129	0.313655
Clic4	0.0468823	7.04943	1.83045	0.176074	0.00564924	7.04943	0.0265746	0.870505	-0.0164375	-0.0124537	0.19571	0.877269
Clic5	-1.49234	3.37106	62.8343	2.2485e-15	0.113025	3.37106	0.399132	0.527538	0.449586	0.00494422	0	0.547728
Clint1	-0.00493566	6.18111	0.0137264	0.906734	-0.00612147	6.18111	0.0211283	0.88443	0.00190346	-0.0278576	0.910661	0.89036
Clip1	0.0477151	3.91782	0.167316	0.682508	-0.14581	3.91782	1.56639	0.210732	-0.0135264	-0.0722536	0.696019	0.232999
Clip2	0.184134	3.55376	2.73707	0.0980442	-0.053491	3.55376	0.230511	0.631145	-0.073883	-0.00690889	0.113554	0.648099
Clk1	-0.288634	4.91256	19.9414	7.98541e-06	-0.155193	4.91256	5.76438	0.0163543	0.097689	0.00418451	8.10291e-06	0.0214727
Clk2	-0.049082	3.91131	0.304544	0.581047	0.160738	3.91131	3.26661	0.0707036	0.016826	0.00814952	0.598432	0.083934
Clk4	-0.306272	4.80669	24.3528	8.02112e-07	0.0718346	4.80669	1.33885	0.247236	0.108499	0.0201812	4.05145e-06	0.269337
Clmn	-0.106088	8.04551	11.8099	0.000589163	0.00348172	8.04551	0.0127206	0.9102	0.036306	-0.00760445	0.00094804	0.914486
Cln3	-0.202839	4.65401	6.06582	0.0137823	0.154705	4.65401	3.52784	0.0603465	0.0679686	0.0472412	0.0181465	0.0722658
Clock	0.0249289	5.26993	0.109161	0.741101	-0.00171548	5.26993	0.000504195	0.982086	-0.0110317	0.00692813	0.751889	0.982866
Clp1	0.267014	5.16041	17.5435	2.80812e-05	0.00956048	5.16041	0.0223917	0.88105	-0.0900839	0.0165253	7.29262e-05	0.887305
Clptm1	-0.0160608	5.01513	0.0538959	0.816418	0.0111215	5.01513	0.0259202	0.872095	0.00352677	0.0399505	0.82422	0.878752
Cluap1	-0.6478	2.61878	9.14091	0.00249957	0.436185	2.61878	4.16424	0.041286	0.200364	0.103551	0.00363821	0.050789
Cluh	0.0824913	8.54904	7.23693	0.00714192	-0.00673092	8.54904	0.0481857	0.826251	-0.0293448	0.00358824	0.00971133	0.835815
Clybl	0.57311	3.06355	10.6292	0.00111319	0.264795	3.06355	2.27293	0.131651	-0.190001	0.0971503	0.00175428	0.150507
Cmah	0.00111532	9.01942	0.00141439	0.97	-0.00137923	9.01942	0.00216329	0.962903	-0.00058023	-0.00338885	0.971449	0.964793
Cmas	0.121978	7.24789	9.31207	0.0022765	0.0462584	7.24789	1.33951	0.24712	-0.0421197	0.00494464	0.00337081	0.269227
Cmbl	0.0570672	6.22512	0.869467	0.351103	0.0145647	6.22512	0.0565727	0.811997	-0.0206905	0.0142377	0.374573	0.822279
Cmc1	-0.524831	3.77361	15.2415	9.46021e-05	-0.184349	3.77361	1.88091	0.170231	0.174521	-0.0346257	0.000174212	0.192071
Cml1	-0.775424	8.13386	651.663	9.71362e-144	0.0386323	8.13386	1.62504	0.20239	0.262177	0.00605564	0	0.224734
Cml2	1.82602	2.4615	148.559	3.58111e-34	0.0320157	2.4615	0.0339369	0.853841	-0.55601	0.0168467	0	0.861732
Cmpk2	-0.180848	2.77878	1.91714	0.166172	0.150629	2.77878	1.32984	0.248834	0.06014	0.00811458	0.18522	0.270977
Cmss1	-0.669558	3.08223	22.5629	2.03376e-06	0.163692	3.08223	1.34487	0.246177	0.222596	0.0292506	4.05145e-06	0.268267
Cmtm6	-0.021374	7.26133	0.493637	0.482309	0.00272484	7.26133	0.00803416	0.928578	0.00658493	-0.00529508	0.503673	0.931944
Cmtm7	0.16737	2.99957	1.52117	0.217443	-0.0718777	2.99957	0.27872	0.597542	-0.0660187	0.0113559	0.238943	0.615262
Cmtm8	0.012916	6.89478	0.125778	0.72285	-0.0396729	6.89478	1.18694	0.275948	-0.00513355	-0.0157072	0.73467	0.298572
Cnbd2	0.334765	4.28756	11.5849	0.000664901	0.0750193	4.28756	0.581828	0.445597	-0.116049	0.0237495	0.00106553	0.467817
Cnep1r1	0.157334	3.53129	2.75189	0.0971394	-0.00137878	3.53129	0.00021678	0.988253	-0.0614856	0.0150188	0.112509	0.988846
Cnih	-7.24789	4.57727	626.578	2.77416e-138	0.404898	4.57727	1.72601	0.188921	0.985692	0.00241914	0	0.211421
Cnih4	-0.178473	3.47831	2.079	0.149338	0.00105093	3.47831	7.28052e-05	0.993192	0.0663687	0.0470721	0.167852	0.993595
Cnot1	-0.109078	4.8058	1.03122	0.309872	-0.174695	4.8058	2.6435	0.103974	0.0362977	0.0372386	0.333029	0.120438
Cnot2	0.18257	4.04759	2.25631	0.133071	0.0846126	4.04759	0.484084	0.486578	-0.0607362	0.0198974	0.151014	0.507842
Cnot4	0.11997	4.32719	1.75699	0.185	0.0721975	4.32719	0.63534	0.425403	-0.0449491	-0.0252049	0.205052	0.447896
Cnot6	-2.97978	3.31691	453.582	1.19851e-100	0.258713	3.31691	3.12158	0.0772621	0.773236	0.0105734	0	0.0912549
Cnot6l	0.0882569	5.78549	2.67294	0.102067	0.0194268	5.78549	0.129452	0.719001	-0.0293916	-0.0416338	0.118059	0.732584
Cnp	-0.396225	4.23907	25.7747	3.83681e-07	0.0143893	4.23907	0.0339187	0.85388	0.138693	0.0122282	4.05145e-06	0.861764
Cnpy2	-0.294076	7.63576	73.1596	1.19579e-17	0.0195248	7.63576	0.32265	0.570019	0.101397	0.0124327	0	0.589162
Cnpy3	0.00238655	4.39988	0.00106553	0.97396	0.0299145	4.39988	0.165651	0.684007	-0.00286461	0.0264652	0.975274	0.699305
Cntd1	0.149228	5.77093	8.42403	0.00370293	0.0201878	5.77093	0.15411	0.694638	-0.0517035	-0.00758242	0.00526689	0.709353
Cntnap1	0.515289	3.0099	10.9532	0.000934401	0.0930365	3.0099	0.356838	0.550268	-0.160382	-0.0877371	0.00146663	0.569545
Cntrob	-0.452341	3.68148	18.44	1.75336e-05	-0.0878424	3.68148	0.695524	0.404292	0.153283	-0.00104896	4.86174e-05	0.427133
Cobl	0.707045	3.49667	21.5267	3.48933e-06	0.318845	3.49667	4.38608	0.0362336	-0.220116	-0.0501123	4.05145e-06	0.0448617
Cog2	-0.101001	5.95244	3.52118	0.0605892	0.00371892	5.95244	0.00477716	0.944897	0.0342422	-0.00879034	0.0727114	0.947963
Cog6	0.126042	6.13786	6.24958	0.0124223	0.0958914	6.13786	3.61702	0.0571913	-0.0434498	0.00674349	0.0164975	0.0688747
Coil	0.24009	4.25248	5.42294	0.0198739	0.0280173	4.25248	0.0738399	0.785826	-0.0802266	-0.0329407	0.0253783	0.797452
Col11a2	-0.88714	4.13977	4.63073	0.0314042	-0.0978709	4.13977	0.0563814	0.81231	0.225635	-0.036713	0.0392707	0.822603
Col13a1	-0.0187475	3.47854	0.0117433	0.913705	-0.0111044	3.47854	0.00445535	0.946782	-0.00205632	0.0232289	0.917261	0.949782
Col14a1	0.0918738	5.18526	0.648367	0.420697	-0.0260802	5.18526	0.0521464	0.81937	-0.0298793	0.0308049	0.442654	0.829393
Col16a1	0.0361819	4.06646	0.0776872	0.780456	0.257787	4.06646	3.9226	0.0476413	-0.0105038	-0.00232637	0.789191	0.0579358
Col1a2	-0.204506	4.75888	4.57191	0.0325003	0.0753873	4.75888	0.62225	0.430212	0.0638886	0.0137305	0.0405429	0.452734
Col20a1	1.56017	3.1155	159.811	1.24409e-36	0.108969	3.1155	0.750412	0.386346	-0.499345	-0.025807	0	0.408796
Col27a1	0.547668	7.1143	63.4631	1.63399e-15	-0.0855459	7.1143	1.55484	0.212423	-0.188893	0.00842415	0	0.234612
Col4a2	0.0283993	6.73329	0.321522	0.570694	0.0474603	6.73329	0.898979	0.343056	-0.00694132	-0.0255682	0.588547	0.366045
Col4a3bp	-5.45236	3.35617	573.179	1.14239e-126	-0.232366	3.35617	0.76453	0.381915	0.954328	-0.0132657	0	0.404282
Col6a3	-0.0271544	3.76256	0.0296881	0.8632	-0.0259879	3.76256	0.027276	0.868822	0.00600872	-0.0272136	0.868214	0.875519
Colec10	-0.0228731	7.34907	0.357011	0.550171	-0.0295228	7.34907	0.594792	0.440572	0.00747073	0.00288154	0.568893	0.463126
Colec11	-9.37247	4.25944	236.757	2.00359e-53	0.356187	4.25944	1.42493	0.232594	0.991667	0.00833333	0	0.254723
Colgalt2	1.85676	3.82409	196.283	1.35177e-44	0.0122436	3.82409	0.0091839	0.923653	-0.559041	-0.0175214	0	0.92726
Commd1	0.0993999	4.19126	1.28903	0.256227	-0.0898267	4.19126	1.05231	0.304976	-0.0364297	-0.0159021	0.278618	0.328269
Commd10	-1.09709	2.49417	15.4655	8.40229e-05	-0.507913	2.49417	3.38745	0.0656944	0.304244	0.0817621	0.000162058	0.0783673
Commd2	1.40561	6.89586	913.011	1.45698e-200	3.25844e-07	6.89586	5.59413e-07	0.999403	-0.449962	0.0026938	0	0.999392
Commd5	-5.65062	2.38403	355.566	2.60013e-79	-0.0256538	2.38403	0.0551479	0.814336	0.967334	-0.00242643	0	0.824341
Commd9	0.191449	6.31787	15.3942	8.72563e-05	-0.0679466	6.31787	1.93943	0.16373	-0.0667231	-0.00444782	0.000162058	0.185058
Copb1	0.287046	8.01795	88.4016	5.34273e-21	0.00311276	8.01795	0.0104014	0.918767	-0.0994083	-0.0117048	0	0.922374
Copb2	0.0951058	8.87913	8.34193	0.00387405	-0.0210372	8.87913	0.408224	0.522872	-0.0334904	-0.00823501	0.00547757	0.543041
Coprs	0.763748	3.67247	43.0701	5.2812e-11	0.0556519	3.67247	0.229189	0.632126	-0.25563	-0.00773961	0	0.649071
Cops2	0.108165	3.64022	1.10607	0.292937	0.061607	3.64022	0.358315	0.549444	-0.0397277	0.0285786	0.316374	0.568788
Cops3	0.52528	5.24281	61.7807	3.83927e-15	0.0368213	5.24281	0.303558	0.581661	-0.179477	-0.0181677	0	0.600069
Cops5	5.33292	6.83525	1008.67	2.34744e-221	-0.180072	6.83525	1.42934	0.231872	-0.947472	0.000683844	0	0.253945
Cops7a	-0.153961	6.35291	10.2122	0.00139516	-0.0348515	6.35291	0.523204	0.469478	0.0531728	0.00391756	0.00215537	0.491133
Cops7b	-0.376697	2.48326	5.87227	0.0153812	0.257293	2.48326	2.74464	0.0975808	0.114178	0.00264207	0.0201884	0.113331
Cops8	0.00532387	5.29725	0.0086631	0.925843	0.0550126	5.29725	0.922396	0.336847	-0.000953965	0.0475258	0.929221	0.359692
Copz2	0.391792	5.89069	27.3789	1.67244e-07	0.00499487	5.89069	0.004453	0.946796	-0.131447	-0.0107	0	0.949794
Coq10a	-0.0148893	5.50751	0.0517573	0.820033	0.0589984	5.50751	0.811992	0.367532	0.00549073	0.0418356	0.827465	0.390102
Coq10b	-0.0628643	6.57738	1.89989	0.168091	0.0241687	6.57738	0.280777	0.596192	0.0214725	-0.025843	0.187295	0.613933
Coq2	8.06319	4.56456	1872.89	0	0.0257911	4.56456	0.0016143	0.967951	-0.994152	-6.62539e-05	0	0.969497
Coq5	0.0128045	5.48152	0.0533196	0.817384	-0.0484932	5.48152	0.76534	0.381663	-0.00400154	-0.0158425	0.82505	0.404068
Coro1a	-0.119997	2.81639	0.358615	0.549277	-0.246591	2.81639	1.502	0.220364	0.0339468	-0.0751315	0.568066	0.242637
Coro1c	3.26197	3.33529	304.141	4.12667e-68	0.00823848	3.33529	0.000804744	0.977369	-0.794336	-0.017272	0	0.978426
Coro2b	0.407295	2.5308	7.22713	0.00718097	0.108338	2.5308	0.511145	0.474644	-0.139087	0.0107735	0.00977616	0.496068
Cox14	-0.0568471	5.75866	1.07186	0.300526	-0.06212	5.75866	1.27979	0.257938	0.0178653	0.0183414	0.32395	0.280304
Cox17	-0.0457579	2.43101	0.0906355	0.763371	-0.031351	2.43101	0.0421364	0.83736	0.0184033	0.00012316	0.772697	0.846235
Cox18	-0.758901	3.54394	18.9905	1.31373e-05	0.114331	3.54394	0.427137	0.513397	0.248569	-0.011014	2.43087e-05	0.533787
Cox19	0.471786	7.55125	70.1665	5.45053e-17	-0.0228705	7.55125	0.165453	0.684185	-0.162534	2.49293e-05	0	0.699479
Cox7a2	-7.70709	5.86676	483.496	3.70695e-107	0.220602	5.86676	0.540076	0.462401	0.988006	-0.001359	0	0.484181
Cox7a2l	7.57743	5.07183	242.548	1.09404e-54	0.984466	5.07183	5.15463	0.0231845	-0.969226	0.022537	0	0.0299645
Cox8a	8.2578	8.57338	2251.91	0	0.0857305	8.57338	0.316011	0.574015	-0.993203	0.00063776	0	0.592878
Cpd	-0.63596	5.80278	131.432	1.99194e-30	-0.0165474	5.80278	0.0888426	0.765654	0.215698	0.0190417	0	0.778151
Cpeb3	3.91652	4.33943	247.716	8.17161e-56	-0.126847	4.33943	0.292831	0.588412	-0.849737	-0.0494157	0	0.60664
Cpeb4	0.0936302	5.74385	1.97217	0.160217	0.0773199	5.74385	1.34546	0.246073	-0.0310365	0.034242	0.179329	0.268133
Cped1	-0.00969527	6.8375	0.0504698	0.822248	-0.00678618	6.8375	0.0247235	0.875058	0.00256315	0.0141848	0.829454	0.881503
Cpm	-3.00926	3.52353	161.484	5.36348e-37	0.159623	3.52353	0.460107	0.497574	0.745992	0.0655312	0	0.51861
Cpn2	0.0998521	7.80662	12.153	0.000490094	0.0289347	7.80662	1.02053	0.312393	-0.0346901	-0.000911943	0.000830548	0.335428
Cpne1	-0.29766	7.22671	58.0821	2.51405e-14	0.0623736	7.22671	2.55159	0.110183	0.102872	0.0193293	0	0.127098
Cpne8	0.275517	2.66686	2.59672	0.107085	0.180606	2.66686	1.1211	0.289682	-0.0874414	0.051833	0.123391	0.312254
Cpox	-0.794867	8.94673	628.725	9.46334e-139	0.00243902	8.94673	0.00598858	0.938317	0.267962	0.00167496	0	0.941663
Cps1	-0.200228	12.1326	63.7105	1.44114e-15	-0.0137386	12.1326	0.300185	0.583766	0.0686947	-0.00265366	0	0.602155
Cpsf1	-0.0441639	3.51624	0.0790777	0.778551	-0.367312	3.51624	5.51196	0.0188869	0.00842675	-0.102561	0.787424	0.0247584
Cpsf3	0.0273039	4.62059	0.0984423	0.753707	-0.0493837	4.62059	0.322122	0.570335	-0.00867133	-0.0110081	0.763865	0.589377
Cpsf3l	0.296715	7.03699	61.7414	3.91664e-15	0.106141	7.03699	7.9031	0.00493502	-0.102068	0.021708	0	0.00681454
Cpsf4	0.0858906	4.75412	2.01156	0.156105	-0.0112945	4.75412	0.0348115	0.851991	-0.0299356	-0.017098	0.174917	0.85999
Cpsf6	-0.202394	6.92321	23.9159	1.00635e-06	0.0147497	6.92321	0.127067	0.721492	0.0702789	0.0141715	4.05145e-06	0.735003
Cradd	1.11884	3.81077	129.258	5.95533e-30	-0.0103973	3.81077	0.0103861	0.918826	-0.369297	-0.0195371	0	0.922459
Cramp1l	0.0289647	5.08823	0.168002	0.681894	-0.0317063	5.08823	0.201379	0.65361	-0.00936778	-0.0437007	0.695412	0.670143
Crbn	-0.0950252	3.79535	0.689689	0.40627	0.102742	3.79535	0.807455	0.368874	0.0294266	0.0262943	0.42866	0.391379
Creb3	0.358331	6.68806	62.2938	2.95862e-15	-0.0449608	6.68806	0.981675	0.321786	-0.123582	0.00751616	0	0.344811
Creb3l2	-0.0766016	4.04668	0.495361	0.481545	0.148034	4.04668	1.85302	0.173432	0.0273309	0.0515295	0.502943	0.195345
Crebbp	-0.241815	4.74133	7.66025	0.00564505	0.00182321	4.74133	0.000448012	0.983113	0.0839771	-0.01318	0.00771802	0.983733
Crebl2	-0.156787	7.74581	26.0098	3.39681e-07	-0.029895	7.74581	0.945671	0.330824	0.0535174	0.00529585	4.05145e-06	0.353866
Crebrf	-0.127524	6.3134	8.27241	0.0040252	0.00880683	6.3134	0.0394511	0.842558	0.044851	-0.00825202	0.00567609	0.851133
Crebzf	0.380176	3.75869	13.4983	0.000238776	0.121186	3.75869	1.37302	0.241294	-0.131048	0.0467381	0.000421351	0.26334
Creg1	0.368847	9.07005	187.518	1.10716e-42	0.000337904	9.07005	0.000156453	0.99002	-0.127507	0.000648025	0	0.990495
Crim1	-0.481185	6.19315	104.959	1.2469e-24	-0.00977188	6.19315	0.0432873	0.835185	0.16436	-0.0126847	0	0.844047
Crk	-0.0823727	5.92693	3.21675	0.0728884	-0.0148807	5.92693	0.104985	0.745928	0.0282983	-0.00536207	0.0864783	0.758594
Crlf3	0.109744	4.38183	1.76046	0.184567	-0.0774697	4.38183	0.876711	0.349104	-0.0396411	-0.0236895	0.204623	0.372037
Crnkl1	-0.254264	5.92334	19.3535	1.08619e-05	-0.00917933	5.92334	0.0252101	0.873845	0.0851024	0.0147585	1.62058e-05	0.880344
Crot	-0.972306	9.9305	1020.43	6.51733e-224	-0.00426354	9.9305	0.0199302	0.887732	0.323512	-0.0014659	0	0.893589
Crtc3	-0.043366	4.32654	0.197162	0.657022	0.0107776	4.32654	0.0123129	0.911645	0.0121801	0.0122861	0.671427	0.91588
Crybg3	-0.0407844	5.13448	0.489372	0.484208	-0.080658	5.13448	1.91355	0.16657	0.0127088	-0.0145308	0.505569	0.188101
Cs	0.268087	7.99891	58.8331	1.71632e-14	0.00729876	7.99891	0.0436182	0.834566	-0.0927297	-0.00728267	0	0.843359
Csde1	0.0537912	4.34837	0.425507	0.514202	-0.0932573	4.34837	1.27971	0.257952	-0.0173488	-0.0300265	0.534395	0.280308
Csf1r	-0.0493645	6.52431	1.01484	0.313747	0.0385995	6.52431	0.619979	0.431055	0.0194104	-0.0240595	0.336951	0.453621
Csgalnact2	-0.187155	3.54389	2.82015	0.0930877	0.116414	3.54389	1.09092	0.296268	0.0681155	0.0716116	0.108117	0.319088
Csnk1a1	0.185928	8.99047	44.5937	2.42467e-11	0.0313275	8.99047	1.26655	0.260414	-0.0646282	0.00775878	0	0.2828
Csnk1d	-0.0852952	5.84509	2.28391	0.130722	0.0539064	5.84509	0.912266	0.339514	0.0301264	-0.0158627	0.148583	0.362427
Csnk1g1	0.672786	2.34237	16.6422	4.51365e-05	-0.0915452	2.34237	0.31627	0.573858	-0.228516	-0.0667456	0.000105338	0.592744
Csnk1g3	8.58993	5.2434	425.981	1.21773e-94	-0.522462	5.2434	1.71737	0.190032	-0.991659	0.000860281	0	0.212555
Csnk2a1	-1.33422	3.73734	168.655	1.45512e-38	-0.0454186	3.73734	0.192587	0.660772	0.429465	0.0424864	0	0.676961
Csnk2b	0.250233	7.79809	42.5659	6.83392e-11	0.000228273	7.79809	3.54238e-05	0.995251	-0.0866512	0.0181793	0	0.995515
Cspp1	-0.427193	4.88074	31.6222	1.87279e-08	0.019581	4.88074	0.0665069	0.796492	0.148129	-0.0082076	0	0.807499
Csrnp1	-0.18033	6.27848	10.7968	0.00101677	0.0234982	6.27848	0.183312	0.668542	0.0616039	-0.00871025	0.00159627	0.68423
Csrp1	-0.335266	5.71287	45.8376	1.28474e-11	0.0792063	5.71287	2.55776	0.109754	0.113786	0.0132999	0	0.126612
Csrp2	0.702909	6.59702	76.0947	2.70386e-18	0.0332917	6.59702	0.172116	0.678238	-0.234522	0.0308077	0	0.693589
Csrp2bp	0.0180158	4.63663	0.0455807	0.83094	-0.108932	4.63663	1.66867	0.196437	-0.00649178	-0.0267743	0.837314	0.21875
Cst3	1.33965	7.65322	1166.77	1.01762e-255	0.0214997	7.65322	0.304792	0.580893	-0.433594	-0.00707852	0	0.599279
Cstf3	-0.0405066	3.60295	0.0775318	0.780671	-0.136122	3.60295	0.887053	0.346277	0.00552522	-0.0141693	0.78941	0.369136
CT030159.1	0.628673	4.33481	60.1435	8.81874e-15	-0.0535838	4.33481	0.436911	0.508617	-0.218178	-0.00727501	0	0.529006
CT030702.1	0.131648	3.35044	1.47567	0.224453	-0.0219082	3.35044	0.0409494	0.839636	-0.0459722	-0.0231632	0.246077	0.848318
Ctage5	0.216391	8.87546	43.9244	3.41309e-11	0.0205515	8.87546	0.396435	0.528936	-0.074911	-0.00443387	0	0.549053
Ctc1	0.208779	4.98596	6.52008	0.0106663	-0.0686013	4.98596	0.704311	0.401339	-0.0708126	-0.049248	0.0143421	0.423952
Ctdnep1	-0.0250557	5.29859	0.120139	0.728884	-0.0626994	5.29859	0.752115	0.385807	0.00772383	-0.0266102	0.740338	0.408261
Ctdp1	-0.0651495	5.00493	0.712383	0.398654	0.0317773	5.00493	0.169275	0.680757	0.022643	-0.0043096	0.421327	0.696092
Ctdsp1	0.0580742	7.44026	2.63801	0.104334	0.0446659	7.44026	1.56046	0.211597	-0.0206251	0.0146689	0.120413	0.233894
Ctdsp2	0.284289	6.33198	36.6907	1.38441e-09	0.00789877	6.33198	0.028309	0.866384	-0.0970567	0.00262066	0	0.873275
Ctdspl2	-0.14131	4.46235	3.69339	0.0546285	0.0892062	4.46235	1.47231	0.224982	0.0475488	0.000180926	0.0660752	0.247276
Ctgf	0.160885	4.50947	3.76499	0.0523362	-0.042486	4.50947	0.263047	0.608034	-0.0494557	-0.0285914	0.0635187	0.625439
Ctif	0.0626752	5.76631	1.0802	0.298653	0.0299717	5.76631	0.247194	0.619058	-0.0195366	0.00111309	0.322159	0.636252
Ctla2a	-0.104358	3.36159	0.502433	0.478433	0.249974	3.36159	2.88482	0.0894178	0.0293087	0.0140396	0.499852	0.104552
Ctla2b	2.58529	2.96152	257.784	5.21835e-58	-0.00433927	2.96152	0.00055408	0.98122	-0.703924	0.00274121	0	0.982093
Ctnna1	0.138304	5.82505	8.33017	0.00389921	0.00683077	5.82505	0.0203171	0.886655	-0.0498788	0.00878386	0.00550593	0.892645
Ctnnbip1	-0.0472172	3.81226	0.11518	0.734322	0.167883	3.81226	1.45792	0.227261	0.0174464	-0.0119163	0.745342	0.24957
Ctnnd1	-0.0145704	6.51898	0.109258	0.740991	0.0397516	6.51898	0.813358	0.367129	0.00521886	-0.0120422	0.751788	0.389738
Ctr9	0.330723	5.5872	42.8429	5.93183e-11	0.0336804	5.5872	0.443915	0.505239	-0.113949	0.00396152	0	0.525842
Ctsc	1.76937	5.23567	433.382	2.98339e-96	0.086718	5.23567	1.05657	0.303999	-0.5362	0.0408778	0	0.327305
Ctsd	0.119782	9.12993	16.6342	4.53252e-05	0.0179109	9.12993	0.371987	0.541923	-0.0412606	-0.0154613	0.000105338	0.561519
Ctsf	-0.237698	6.89415	33.7597	6.23578e-09	-0.0058177	6.89415	0.0202501	0.886841	0.0817869	-0.0149458	0	0.892782
Ctsh	-0.044894	9.37635	2.15481	0.142124	0.0025119	9.37635	0.00674293	0.934555	0.0147344	0.0189508	0.160243	0.937932
Ctso	0.0142447	5.00968	0.0585034	0.808877	0.0157138	5.00968	0.0712442	0.789534	-0.00402698	0.011353	0.816801	0.800891
Cttn	0.012267	7.22074	0.0928947	0.760529	0.0209136	7.22074	0.269932	0.603378	-0.00489856	-0.0265322	0.769995	0.621092
Ctu1	0.13422	3.02837	1.07727	0.299308	0.0423472	3.02837	0.107509	0.742998	-0.0541838	-0.0378881	0.322706	0.755633
Ctu2	0.151797	5.52772	6.45703	0.0110514	-0.0371909	5.52772	0.387505	0.533614	-0.0541752	-0.0334111	0.0147919	0.553542
Cul4a	-0.126582	8.80181	19.8917	8.19565e-06	0.0184756	8.80181	0.423853	0.515021	0.0436335	0.00360528	8.10291e-06	0.535375
Cul9	-0.0388325	2.72736	0.0626012	0.802431	0.0543628	2.72736	0.121888	0.726995	0.0137948	-0.0261318	0.810582	0.740257
Cuta	-0.148448	6.28943	11.3296	0.000762793	-0.0129131	6.28943	0.0857564	0.769643	0.0495931	-0.000927863	0.00122759	0.781987
Cux1	-0.789638	4.69905	79.0967	5.91441e-19	-0.0180222	4.69905	0.0414895	0.838596	0.26026	-0.00202941	0	0.847386
Cwc27	-0.5921	2.28351	6.97511	0.00826512	-0.167879	2.28351	0.573811	0.448748	0.189009	0.0157749	0.0111253	0.470823
Cx3cr1	-0.455208	3.1783	20.6446	5.52942e-06	0.186135	3.1783	3.44346	0.0635024	0.14828	0.0325734	4.05145e-06	0.0757703
Cxadr	7.02448	3.4923	763.297	5.15433e-168	-0.289077	3.4923	0.861558	0.353303	-0.989272	-0.00297702	0	0.376303
Cxcl10	0.410132	3.72582	13.1861	0.000282036	-0.0422977	3.72582	0.138725	0.709552	-0.1219	-0.0252671	0.000494277	0.723586
Cxcl11	0.239493	2.7694	3.02633	0.0819231	0.0893854	2.7694	0.420729	0.516574	-0.0759071	-0.00669109	0.096141	0.536874
Cxcl16	0.41778	5.70077	29.6581	5.15379e-08	0.132174	5.70077	2.97339	0.0846444	-0.140117	0.0315947	0	0.0994146
Cxcl9	0.0927522	5.95811	1.81418	0.178007	-0.057908	5.95811	0.707702	0.400208	-0.0353514	-0.0356243	0.197666	0.422785
Cxcr6	0.705911	3.76418	44.6486	2.35764e-11	-0.0450744	3.76418	0.180237	0.67117	-0.242945	-0.0380083	0	0.686673
Cxxc1	0.154544	4.33077	1.79333	0.180521	0.0434958	4.33077	0.142233	0.706071	-0.0505931	-0.0126441	0.20032	0.720215
Cxxc5	0.0225727	4.5577	0.0655609	0.797913	-0.0520453	4.5577	0.349329	0.554493	-0.00728997	0.0429264	0.806308	0.573913
Cyb5b	0.0780472	7.5379	4.4248	0.0354203	-0.0460999	7.5379	1.54394	0.214032	-0.027584	-0.0163057	0.0438894	0.236342
Cyb5d1	-0.00305067	4.59249	0.00197136	0.964586	0.0184582	4.59249	0.0723449	0.787953	0.00024973	-0.00452829	0.966377	0.799421
Cyb5r3	1.27297	6.87614	1050.29	2.10757e-230	-0.000437328	6.87614	0.000151005	0.990196	-0.414258	0.00324796	0	0.990649
Cyb5r4	-0.0802298	7.34894	4.26737	0.0388509	-0.00365614	7.34894	0.00886688	0.924979	0.0269841	0.00936159	0.047953	0.928476
Cyb5rl	-0.210425	2.98243	1.52488	0.216882	0.0645686	2.98243	0.144389	0.703957	0.0827738	0.0607848	0.238315	0.718185
Cyba	0.0804297	5.28119	1.23522	0.266393	0.00480416	5.28119	0.00445309	0.946795	-0.0241477	0.0153688	0.289043	0.949794
Cyfip1	-0.254967	7.39341	59.5145	1.21395e-14	-0.00919429	7.39341	0.0773763	0.780885	0.0875597	0.00721497	0	0.793015
Cygb	-0.328685	4.03944	15.3348	9.00418e-05	0.0945495	4.03944	1.26885	0.259983	0.120226	0.0159974	0.00016611	0.28239
Cyhr1	0.164434	4.85991	4.21804	0.0399963	0.0349499	4.85991	0.190619	0.662402	-0.0579579	-0.019649	0.0492738	0.67855
Cyp1a2	0.648015	5.89567	143.931	3.67801e-33	-0.0722887	5.89567	1.79172	0.180717	-0.222091	0.0255793	0	0.202966
Cyp20a1	-0.0334217	4.13731	0.120372	0.728631	-0.0785894	4.13731	0.665341	0.414681	0.00941157	-0.0241152	0.740095	0.437411
Cyp21a1	0.0784425	5.11962	0.354645	0.551495	-0.348625	5.11962	6.96179	0.00832687	-0.0367064	0.060557	0.570088	0.0112509
Cyp21a2-ps	-0.405101	3.91851	5.59269	0.0180355	0.185785	3.91851	1.18141	0.277069	0.135506	-0.0632005	0.0232472	0.299682
Cyp27a1	-0.0273442	9.43634	1.23181	0.267054	0.00127541	9.43634	0.00268099	0.958705	0.00919197	-0.00548791	0.289707	0.960867
Cyp2a12	2.17463	10.5143	940.437	1.59079e-206	-0.0988171	10.5143	2.10376	0.146937	-0.631835	-0.00505765	0	0.167114
Cyp2a22	-0.761356	7.65553	177.691	1.54762e-40	0.0169846	7.65553	0.0882853	0.766368	0.252967	9.95825e-05	0	0.778803
Cyp2a5	1.60214	8.28507	22.5066	2.0942e-06	0.435959	8.28507	1.66061	0.197522	-0.389094	-0.0110764	4.05145e-06	0.219759
Cyp2c29	-10.4088	9.50425	672.683	2.60761e-148	0.144864	9.50425	0.235597	0.627405	0.998012	-0.000207284	0	0.644286
Cyp2c37	-4.09653	6.1242	179.119	7.54664e-41	0.278703	6.1242	0.940428	0.332168	0.828509	0.0012971	0	0.35511
Cyp2c38	7.29519	5.893	267.454	4.07114e-60	-0.403594	5.893	1.03105	0.309911	-0.974968	-0.0022263	0	0.333009
Cyp2c50	5.47477	8.45848	514.369	7.1077e-114	0.409687	8.45848	3.83484	0.0501977	-0.939391	0.0221216	0	0.0609096
Cyp2c54	5.4207	7.11068	241.775	1.61349e-54	0.549776	7.11068	3.14129	0.0763332	-0.918022	0.045963	0	0.0902502
Cyp2d10	-1.4666	11.3862	2440.65	0	0.0232905	11.3862	0.639313	0.42396	0.467523	0.00405882	0	0.446486
Cyp2d11	-1.27229	5.52949	75.2465	4.15476e-18	0.0895062	5.52949	0.378065	0.538641	0.400735	-0.0368108	0	0.5584
Cyp2d12	0.829056	5.46319	2.91739	0.0876297	0.34906	5.46319	0.524136	0.469083	-0.186042	0.210596	0.102222	0.490781
Cyp2d22	-0.91554	8.48551	359.406	3.79209e-80	-0.0460479	8.48551	0.921182	0.337165	0.30456	-0.0151289	0	0.360061
Cyp2d26	0.370848	9.19481	141.934	1.00538e-32	-0.0265812	9.19481	0.730698	0.392657	-0.128106	0.0045328	0	0.415063
Cyp2d34	0.32541	3.43262	1.05234	0.304969	-0.189082	3.43262	0.352101	0.552926	-0.091239	0.0664372	0.328188	0.572337
Cyp2d37-ps	0.645909	4.73643	23.6965	1.12785e-06	-0.13549	4.73643	1.04625	0.306373	-0.212802	0.0292822	4.05145e-06	0.329602
Cyp2d40	1.2973	8.50014	397.345	2.08446e-88	-0.0459244	8.50014	0.512031	0.474261	-0.418367	0.00920083	0	0.49576
Cyp2d9	-3.02218	9.60839	162.747	2.84089e-37	-0.0477099	9.60839	0.0431378	0.835466	0.735037	0.0780657	0	0.844339
Cyp2f2	-0.466021	11.5385	16.587	4.6468e-05	0.146246	11.5385	1.63868	0.200507	0.154391	-0.017545	0.000109389	0.222757
Cyp2g1	1.98108	4.72086	40.4789	1.9875e-10	0.562421	4.72086	3.27234	0.070457	-0.537254	0.0228305	0	0.0836504
Cyp2j5	-0.0108315	9.31213	0.150141	0.6984	0.0112873	9.31213	0.163036	0.686377	0.00359583	-0.00213784	0.711642	0.701525
Cyp2j6	-0.0196435	6.27856	0.166723	0.683041	-0.0787272	6.27856	2.68083	0.101563	0.00440129	-0.00886098	0.696554	0.117853
Cyp2j9	0.232255	4.13111	4.44302	0.0350442	0.0931705	4.13111	0.716621	0.397254	-0.0743121	-0.0531762	0.0434478	0.419674
Cyp39a1	2.02221	4.64194	85.4683	2.35447e-20	0.274596	4.64194	1.63332	0.201244	-0.575691	0.00762521	0	0.223547
Cyp3a13	-0.232451	7.01512	35.7147	2.28439e-09	-0.0122692	7.01512	0.0994508	0.75249	0.0809198	-0.0206189	0	0.765137
Cyp3a41a	-2.92658	11.7837	212.038	4.93399e-48	-0.299239	11.7837	2.63351	0.10463	0.75189	0.0187218	0	0.121224
Cyp3a41b	-2.65224	11.9882	45.0101	1.96018e-11	-0.384008	11.9882	1.2063	0.272067	0.655555	0.0685523	0	0.294687
Cyp3a44	-2.97071	12.101	36.0629	1.91045e-09	-0.649447	12.101	2.03014	0.154207	0.617751	0.0348517	0	0.174938
Cyp46a1	0.457693	2.72294	7.14084	0.00753477	-0.107168	2.72294	0.38398	0.535481	-0.160231	-0.0182977	0.010238	0.555341
Cyp4a10	-0.247147	3.35482	2.65546	0.103195	0.377797	3.35482	6.21166	0.0126912	0.0812089	0.0135655	0.119186	0.0171417
Cyp4a14	1.57576	5.39201	32.3864	1.26366e-08	0.285847	5.39201	1.07456	0.299918	-0.452843	-0.0223219	0	0.322933
Cyp4a32	2.04228	7.98377	365.595	1.70378e-81	0.0584398	7.98377	0.319525	0.571893	-0.594664	0.000333237	0	0.590917
Cyp4b1	-0.302082	4.05644	11.8305	0.000582681	0.320558	4.05644	13.3216	0.00026236	0.104675	0.0400614	0.000939937	0.000437557
Cyp4f15	-0.286151	9.46204	88.806	4.35504e-21	0.0011471	9.46204	0.00143024	0.969832	0.0986089	-0.00857161	0	0.971267
Cyp4f16	-0.010383	3.51599	0.00440666	0.947073	-0.219741	3.51599	1.99564	0.157752	0.0041641	0.00852887	0.950013	0.178588
Cyp4f17	-0.772064	4.52742	47.9582	4.35408e-12	-0.00791571	4.52742	0.00484512	0.944507	0.256889	-0.00368593	0	0.947627
Cyp51	-0.0597072	7.77602	2.78587	0.0950991	0.0883343	7.77602	6.10091	0.0135112	0.016019	0.0131172	0.110362	0.0181384
Cyp7a1	-0.375294	9.36154	132.57	1.12286e-30	0.000728869	9.36154	0.000496949	0.982215	0.129057	0.00599442	0	0.982947
Cyp7b1	-0.0180384	9.15962	0.0656963	0.797709	0.0191788	9.15962	0.0737308	0.78598	0.00975747	-0.00335159	0.806085	0.797597
Cyyr1	0.166994	3.39074	2.21573	0.13661	0.180531	3.39074	2.58936	0.107584	-0.05379	0.0436645	0.154624	0.124388
D030028A08Rik	0.529691	4.88827	53.2497	2.93738e-13	0.0398442	4.88827	0.301162	0.583155	-0.178633	-0.00763549	0	0.60154
D10Wsu102e	0.257723	3.19375	3.51211	0.0609219	0.0715079	3.19375	0.270765	0.602819	-0.0887828	0.0201323	0.0730639	0.620577
D11Wsu47e	-0.196326	3.95713	2.60778	0.106341	-0.0518885	3.95713	0.180737	0.670741	0.0683665	0.0113185	0.122605	0.686272
D130043K22Rik	-0.419802	6.02751	35.1676	3.02515e-09	-0.0965194	6.02751	1.86252	0.172334	0.14306	0.0014726	0	0.194227
D15Ertd621e	0.00247016	4.56462	0.000729082	0.978459	-0.00952277	4.56462	0.0106693	0.917731	-0.00122079	-0.0442643	0.979564	0.921386
D17H6S53E	0.31101	5.3855	21.4055	3.7171e-06	-0.0280443	5.3855	0.174313	0.676307	-0.107178	0.0274277	4.05145e-06	0.691684
D17Wsu92e	0.0648072	9.97861	7.43001	0.00641451	0.00638584	9.97861	0.0721442	0.78824	-0.0230829	0.00587424	0.00869847	0.79966
D1Ertd622e	0.5632	4.43406	38.9981	4.24217e-10	-0.0426155	4.43406	0.222641	0.637035	-0.190593	-0.0243174	0	0.653872
D2hgdh	4.53814	3.89273	882.087	7.68955e-194	-0.171779	3.89273	1.05154	0.305152	-0.917029	-0.0238687	0	0.328407
D330041H03Rik	-3.38803	5.54345	525.309	2.96198e-116	0.0351505	5.54345	0.0633417	0.80129	0.812021	-0.020583	0	0.811923
D4Wsu53e	0.0586088	6.00078	0.980675	0.322032	0.068357	6.00078	1.3343	0.248041	-0.0203686	-0.00148057	0.345224	0.270187
D5Ertd579e	-8.0814	2.95484	809.509	4.61892e-178	0.253047	2.95484	1.35473	0.244452	0.998413	0.0015873	0	0.266464
D630037F22Rik	0.0297658	5.1908	0.308233	0.578767	0.020629	5.1908	0.148026	0.700429	-0.00987709	0.031489	0.596115	0.714761
D630045J12Rik	0.623177	4.25308	41.3317	1.28471e-10	-0.0893548	4.25308	0.849371	0.35673	-0.20959	0.00178143	0	0.379536
D6Wsu163e	0.0811225	3.00594	0.261243	0.609267	-0.321344	3.00594	4.1233	0.0422965	-0.027173	-0.0153596	0.625476	0.0518546
D730039F16Rik	-0.44664	7.36434	193.809	4.68789e-44	-0.0296513	7.36434	0.854427	0.355303	0.153305	-0.0175675	0	0.378118
D8Ertd738e	0.323937	7.61875	66.7563	3.07228e-16	0.00570866	7.61875	0.0207696	0.885408	-0.111973	-0.000155664	0	0.8913
D930015E06Rik	0.478119	5.29084	48.0911	4.06875e-12	0.0721571	5.29084	1.09662	0.295008	-0.161753	-0.026265	0	0.317764
Daam1	-0.00772659	6.33802	0.0278528	0.867455	-0.0547794	6.33802	1.3988	0.236925	0.00270437	-0.0188302	0.872314	0.259022
Dak	-0.137946	7.19672	13.5151	0.000236654	0.0165547	7.19672	0.194613	0.659105	0.0491537	-0.0218947	0.000421351	0.67547
Dap	0.23079	7.81492	73.5005	1.0061e-17	0.0111893	7.81492	0.172793	0.677642	-0.0796755	0.00859411	0	0.693009
Dapk1	0.0727051	8.23405	3.40089	0.0651614	-0.0115398	8.23405	0.0856213	0.769819	-0.0266626	0.0166943	0.077715	0.782149
Darc	-0.172216	2.55031	1.71655	0.190138	0.330973	2.55031	6.30652	0.0120294	0.0519793	0.0939484	0.210509	0.016222
Dars	-0.177353	6.28518	11.226	0.000806609	0.0695059	6.28518	1.72428	0.189144	0.0641026	0.0354028	0.00129647	0.211599
Dars2	-0.401397	4.7283	16.4466	5.00405e-05	-0.0599898	4.7283	0.366976	0.544657	0.138198	0.00310102	0.000117492	0.564064
Daxx	-0.240724	3.74453	3.58671	0.0582436	-0.0404435	3.74453	0.101307	0.750267	0.0755548	-0.0251042	0.0699605	0.762937
Dazap2	-0.104298	6.45246	4.2469	0.0393221	0.00694015	6.45246	0.0188009	0.890939	0.0356325	0.00140716	0.0483987	0.896627
Dbf4	0.0235446	3.05147	0.0169867	0.896303	-0.0995797	3.05147	0.302922	0.582056	-0.0105057	0.00366207	0.900638	0.600393
Dbnl	-0.342661	4.62649	17.1542	3.44653e-05	0.223244	4.62649	7.28104	0.0069686	0.119418	0.0725054	8.50805e-05	0.00941153
Dbt	0.117069	6.47624	3.81695	0.0507364	0.0895735	6.47624	2.2348	0.134934	-0.039704	-0.000261969	0.0616915	0.154247
Dcaf11	0.257667	9.10158	81.0426	2.20906e-19	-0.0260152	9.10158	0.826893	0.363172	-0.0893814	-0.00605222	0	0.385796
Dcaf12	-0.19143	3.28281	2.39907	0.121408	0.0250523	3.28281	0.0410829	0.839378	0.0657505	-0.022367	0.138685	0.848058
Dcaf13	0.120326	4.14977	1.12476	0.288895	-0.0483151	4.14977	0.181648	0.669961	-0.0402902	0.0162565	0.312395	0.685502
Dcaf15	-0.385357	4.00187	11.3294	0.000762912	0.0860894	4.00187	0.567166	0.451387	0.132875	-0.0404669	0.00122759	0.473449
Dcaf4	0.019603	2.93302	0.0142275	0.905054	0.00948081	2.93302	0.00342862	0.953307	-0.00519876	0.00491715	0.909093	0.955811
Dcaf5	0.423784	5.01728	39.4083	3.43835e-10	-0.00151973	5.01728	0.00051793	0.981843	-0.145754	-0.00708234	0	0.98266
Dcaf6	0.0310992	2.57669	0.0495716	0.82381	-0.0567318	2.57669	0.165503	0.68414	-0.012072	-0.0322527	0.830904	0.699447
Dcaf7	-0.0195738	3.33077	0.0290277	0.864715	0.0324798	3.33077	0.08003	0.777257	0.00402963	-0.0440526	0.869673	0.789438
Dcbld1	-1.0113	3.84309	86.1572	1.66188e-20	-0.148119	3.84309	1.84559	0.174298	0.332771	-0.0163262	0	0.19624
Dcbld2	0.657197	4.60571	60.4369	7.59739e-15	0.0214198	4.60571	0.0643384	0.799766	-0.223235	0.0232174	0	0.81059
Dcdc2a	-1.0284	3.30521	71.0669	3.45323e-17	0.194562	3.30521	2.5236	0.112155	0.344873	0.0298366	0	0.129152
Dcdc2b	0.520542	2.88316	11.7349	0.000613379	0.0947675	2.88316	0.376293	0.539594	-0.184855	0.0132439	0.000988555	0.559291
Dchs1	-0.102411	4.23249	1.49347	0.221679	-0.0143561	4.23249	0.0293837	0.863896	0.0305084	0.00742477	0.243184	0.871042
Dck	-0.147084	3.3418	1.46027	0.226888	-0.013376	3.3418	0.0123458	0.911528	0.0509849	0.00236707	0.248626	0.915803
Dclre1a	0.764215	4.94491	78.7519	7.04226e-19	-0.133219	4.94491	2.39927	0.121392	-0.257198	-0.0600816	0	0.139212
Dclre1b	-0.0667187	2.6043	0.257742	0.611676	-0.0113133	2.6043	0.00743248	0.931298	0.0273935	0.0148934	0.627838	0.934687
Dclre1c	-0.574915	4.14956	37.0411	1.15667e-09	0.116388	4.14956	1.51878	0.217805	0.196004	0.0426035	0	0.240126
Dcp2	0.0548496	6.49893	1.61111	0.204335	-0.0086606	6.49893	0.0401699	0.841149	-0.0188739	-0.0161384	0.225241	0.849723
Dcps	-0.0171177	5.623	0.0655732	0.797895	-0.0176889	5.623	0.0700543	0.791258	0.00552675	-0.00888243	0.806292	0.802552
Dctn1	0.517386	4.94829	55.9545	7.41681e-14	0.0730481	4.94829	1.11509	0.290979	-0.175329	0.00618395	0	0.313582
Dctn3	-0.888601	5.44106	140.116	2.51152e-32	0.0171193	5.44106	0.0523407	0.819039	0.294241	-0.00615024	0	0.829008
Dctn4	-0.156568	4.63256	6.13748	0.0132346	0.120368	4.63256	3.62794	0.0568172	0.04919	0.00649687	0.0175185	0.068429
Dcun1d2	0.195198	6.04617	14.9432	0.000110798	0.0650899	6.04617	1.66137	0.197418	-0.0666671	-0.0209083	0.000198521	0.219637
Dcun1d4	0.19098	3.23415	2.85444	0.0911218	-0.0221705	3.23415	0.0384246	0.844593	-0.0680115	-0.0747774	0.106059	0.853038
Ddah1	-0.476635	8.56572	13.7129	0.000212985	-0.0569558	8.56572	0.196332	0.657698	0.154996	0.015194	0.000384888	0.674142
Ddc	-1.07525	7.52713	386.814	4.08747e-86	0.0492632	7.52713	0.823912	0.364039	0.355333	-0.0169407	0	0.386683
Ddhd1	0.341063	2.48614	6.5094	0.0107306	-0.185684	2.48614	1.92956	0.164806	-0.121363	0.0299695	0.014411	0.18629
Ddr1	0.899424	3.63362	4.38981	0.0361544	0.247569	3.63362	0.310522	0.57736	-0.218593	0.145394	0.0447726	0.596034
Ddx11	0.115969	3.58304	1.14386	0.284839	-0.0234181	3.58304	0.0468115	0.828707	-0.0416958	0.0223116	0.308316	0.838007
Ddx18	-0.101271	5.31081	3.01679	0.0824063	-0.0299633	5.31081	0.264043	0.607356	0.0327379	0.0298334	0.0966393	0.624807
Ddx21	0.546279	3.72914	25.8471	3.69565e-07	0.00185487	3.72914	0.000295845	0.986277	-0.184631	-0.00533827	4.05145e-06	0.986841
Ddx24	0.0572499	4.17125	0.556614	0.455628	-0.0481752	4.17125	0.394214	0.530093	-0.0193137	-0.00719506	0.477018	0.550143
Ddx39	-0.00219135	5.12129	0.00106654	0.973947	-0.0103778	5.12129	0.0237941	0.87741	0.00214974	-0.0186523	0.97527	0.883857
Ddx39b	1.55123	7.15163	547.321	4.8177e-121	-0.0481514	7.15163	0.543822	0.460853	-0.4889	0.0254347	0	0.482585
Ddx42	-0.207927	3.62147	4.74411	0.0293988	-0.0242748	3.62147	0.0646392	0.799308	0.0712911	0.0176491	0.0368682	0.81023
Ddx47	0.177479	5.74547	9.54301	0.00200713	-0.0323397	5.74547	0.316709	0.573592	-0.060772	0.00968429	0.00296972	0.592521
Ddx5	-0.269568	5.40754	20.1444	7.18092e-06	0.0153161	5.40754	0.0649419	0.798849	0.0932368	-0.00912377	8.10291e-06	0.809825
Ddx55	-0.10393	3.68033	0.868533	0.351362	0.230178	3.68033	4.25937	0.0390344	0.0368687	0.0608641	0.374869	0.0481596
Ddx59	-0.865837	3.12093	27.7924	1.35056e-07	-0.0792829	3.12093	0.23155	0.630377	0.287213	0.0669489	0	0.647345
Decr1	-0.281377	9.5706	119.302	8.99326e-28	0.0154159	9.5706	0.358544	0.549316	0.0968062	-0.00522176	0	0.568666
Decr2	-0.285277	10.0042	96.6538	8.2573e-23	-0.05151	10.0042	3.15521	0.075685	0.0979471	-0.0146033	0	0.089452
Dedd	0.0696388	5.77083	1.4086	0.23529	-0.0161314	5.77083	0.0755749	0.783386	-0.0244884	0.0127885	0.257235	0.795288
Dedd2	-0.645926	6.24553	133.811	6.01e-31	0.0101653	6.24553	0.033308	0.855187	0.2187	-0.0240741	0	0.862939
Def8	-0.616161	6.78567	190.977	1.94563e-43	0.0629341	6.78567	1.99735	0.157575	0.210416	0.0166711	0	0.178353
Degs1	0.0859858	6.8726	5.03301	0.0248687	-0.0119191	6.8726	0.0967181	0.755804	-0.0306431	-0.00611313	0.0312975	0.768459
Dek	-0.164661	4.62452	4.62026	0.0315964	-0.0370775	4.62452	0.234248	0.628392	0.0564353	0.0224215	0.039526	0.645295
Dennd4a	0.379006	4.21533	12.849	0.000337657	0.175212	4.21533	2.74664	0.0974588	-0.12598	0.0233898	0.000563152	0.11319
Dennd4c	-0.183191	4.95327	10.3291	0.0013095	0.0683366	4.95327	1.437	0.230626	0.0632344	0.0105512	0.00205814	0.252823
Dennd5a	0.00470618	4.66177	0.00312096	0.955449	0.0308369	4.66177	0.133514	0.714816	-0.00319086	-0.000146476	0.958039	0.728634
Depdc5	0.044753	3.65665	0.11504	0.734478	0.303741	3.65665	5.26784	0.021723	-0.0159985	0.00843938	0.745492	0.0281779
Deptor	-0.938438	5.29956	164.457	1.20191e-37	0.0724819	5.29956	0.984659	0.321051	0.310874	0.0352553	0	0.344094
Dera	0.405865	7.76503	66.8277	2.96311e-16	-0.0167952	7.76503	0.114708	0.734846	-0.140187	0.00736857	0	0.747813
Derl1	-0.154697	5.12033	6.72277	0.00951897	-0.0189241	5.12033	0.100439	0.751304	0.0509205	-0.0134421	0.0127013	0.763893
Derl2	0.256187	7.378	37.1758	1.07946e-09	0.0297647	7.378	0.502226	0.478523	-0.088249	0.0180296	0	0.499844
Des	-0.137039	2.68916	0.603583	0.437214	-0.112786	2.68916	0.409119	0.522417	0.0420157	-0.00381943	0.459013	0.542652
Desi1	0.0165652	4.09476	0.0197697	0.888182	-0.211464	4.09476	3.2263	0.072464	-0.00529044	-0.0499114	0.892697	0.0858989
Dffa	-0.292466	4.31707	12.0372	0.000521503	0.0801381	4.31707	0.90329	0.341901	0.100949	0.0289669	0.00086296	0.364902
Dgka	-0.39236	3.80852	8.15929	0.00428412	0.180587	3.80852	1.72229	0.189399	0.13699	0.0721289	0.00597184	0.211867
Dgkd	-0.160428	4.24983	2.79643	0.0944743	-0.0570024	4.24983	0.352978	0.552432	0.0535416	-0.0204314	0.109734	0.571806
Dgke	0.121162	3.5531	1.50381	0.220086	-0.151008	3.5531	2.33642	0.12638	-0.0448399	0.0158383	0.241576	0.144746
Dgkq	-0.0315337	6.04384	0.422941	0.515473	0.071358	6.04384	2.16603	0.14109	0.0110194	0.0141258	0.535517	0.161106
Dgkz	-0.0362126	4.82861	0.128419	0.720077	0.0714691	4.82861	0.500856	0.479124	0.0110784	0.0258466	0.731887	0.500464
Dhcr24	-0.0935377	9.96226	12.0953	0.000505495	0.00103621	9.96226	0.00148458	0.969265	0.0317926	0.00803148	0.000846754	0.970708
Dhcr7	-0.419259	6.28072	36.877	1.25819e-09	-0.0191137	6.28072	0.0768158	0.78166	0.145834	-0.00773077	0	0.793647
Dhdds	-0.0808806	3.6094	0.539508	0.462637	-0.0360925	3.6094	0.107674	0.742807	0.0288741	-0.0113664	0.484068	0.755475
Dhfr	0.412085	5.35298	31.8255	1.68663e-08	-0.0684894	5.35298	0.878595	0.348587	-0.1418	-0.0355713	0	0.371518
Dhrs1	-0.0209967	6.19116	0.14818	0.700281	-0.0168621	6.19116	0.0954719	0.757333	0.00877813	-0.0144117	0.713364	0.770064
Dhrs11	0.339517	4.63154	15.9024	6.66946e-05	0.0102635	4.63154	0.0144359	0.904365	-0.116748	-0.0012819	0.000129647	0.90926
Dhrs3	-0.0471803	8.33264	2.26736	0.132125	0.0288936	8.33264	0.850465	0.356421	0.0155028	0.0144292	0.150062	0.379253
Dhrs7	-0.955092	5.83925	188.588	6.46573e-43	0.0583925	5.83925	0.706691	0.400544	0.320847	0.0113825	0	0.423118
Dhtkd1	-2.47137	5.92844	616.021	5.48455e-136	-0.100815	5.92844	1.08003	0.298691	0.686948	-0.00209423	0	0.321604
Dhx33	-0.168551	5.97365	7.70474	0.0055076	0.010314	5.97365	0.0288764	0.865065	0.0583597	-0.0120995	0.0075195	0.872116
Dhx34	0.181496	2.7372	1.57811	0.209033	0.159997	2.7372	1.22527	0.26833	-0.0665016	-0.0133073	0.230131	0.29106
Dhx35	-0.269383	3.21079	3.42271	0.0643053	0.0570383	3.21079	0.152775	0.695897	0.0931401	0.027504	0.0767345	0.710552
Dhx37	-0.230623	3.03453	1.02258	0.311907	0.0472356	3.03453	0.0430084	0.83571	0.0717851	0.0128414	0.335148	0.844598
Dhx58	-0.318855	5.49944	21.207	4.12264e-06	0.0694353	5.49944	1.00684	0.315662	0.107527	0.0247488	4.05145e-06	0.338778
Dhx8	0.0685841	4.54234	0.547537	0.459326	0.00648163	4.54234	0.00490551	0.944162	-0.0226084	-0.00183483	0.480766	0.94738
Diablo	-0.0538423	3.54119	0.26915	0.603903	-0.012879	3.54119	0.0154419	0.901105	0.0204263	-0.02477	0.620273	0.906229
Diap1	0.269234	6.45769	32.8177	1.01221e-08	-0.0192556	6.45769	0.167861	0.682019	-0.0935386	-0.0107096	0	0.69732
Dicer1	0.319396	4.94931	14.0423	0.000178745	-0.0867473	4.94931	1.03693	0.308537	-0.110113	-0.0218497	0.000311962	0.331729
Diexf	-0.0945279	3.41537	0.555645	0.45602	-0.0479324	3.41537	0.143109	0.705209	0.0381279	0.0570667	0.477403	0.719376
Dip2b	-0.0243828	5.22542	0.145089	0.703274	-0.00814212	5.22542	0.0161835	0.898771	0.00737085	0.0241155	0.716098	0.904009
Dip2c	-0.0286649	6.10835	0.164511	0.685037	0.00753745	6.10835	0.0113925	0.914999	0.00877015	-0.00733183	0.698544	0.918943
Dirc2	-0.079676	6.6003	3.02922	0.0817776	0.0260702	6.6003	0.324426	0.56896	0.0273861	0.000219737	0.0959992	0.588081
Dis3l	0.0315369	5.75545	0.340148	0.559744	0.0363897	5.75545	0.452906	0.500958	-0.011154	-0.0113154	0.577988	0.521985
Dis3l2	0.344544	4.0969	9.17806	0.00244933	0.102348	4.0969	0.810256	0.368045	-0.111876	-0.0567	0.00356933	0.390617
Disp2	-5.43945	3.77366	565.156	6.3535e-125	0.03628	3.77366	0.00611943	0.937648	0.954113	-0.00456249	0	0.940962
Dixdc1	0.292495	4.9603	12.1154	0.000500083	0.035032	4.9603	0.174361	0.676265	-0.100514	0.0414726	0.000838651	0.69166
Dkk3	0.858598	4.16042	70.7982	3.95702e-17	0.0359963	4.16042	0.124365	0.724348	-0.281601	-0.00203058	0	0.737745
Dlat	0.0803896	5.82778	2.08955	0.14831	-0.0454394	5.82778	0.667471	0.413935	-0.0297732	-0.000199934	0.166697	0.436536
Dlc1	-4.38513	3.42356	606.65	5.98997e-134	-0.159298	3.42356	0.721024	0.395808	0.912633	-0.0148873	0	0.418009
Dld	0.74674	5.34785	143.934	3.67352e-33	-0.0377966	5.34785	0.368732	0.543696	-0.250696	0.0170516	0	0.563217
Dlec1	1.27721	9.30056	679.236	9.79781e-150	-0.0256193	9.30056	0.280882	0.596124	-0.412221	-0.0419249	0	0.613864
Dlg1	0.165612	4.60038	3.07801	0.0793578	-0.0922605	4.60038	0.954834	0.328492	-0.0589432	-0.0266501	0.0934265	0.351573
Dlgap1	-0.91292	2.8838	19.3082	1.11229e-05	0.0300988	2.8838	0.014702	0.903491	0.292724	-0.0618378	1.62058e-05	0.908494
Dlgap4	0.0042181	3.69468	0.00150378	0.969067	-0.0265858	3.69468	0.0600975	0.806342	-0.00304467	-0.061678	0.970493	0.816846
Dll4	-0.0932973	4.08629	0.996421	0.318178	0.0547526	4.08629	0.343265	0.557951	0.0332033	0.0243187	0.341278	0.577316
Dmgdh	0.25543	8.51681	66.9553	2.77738e-16	0.00871379	8.51681	0.077961	0.78008	-0.0887782	0.0126713	0	0.79227
Dmtf1	0.141923	6.29596	10.0993	0.00148329	0.0755246	6.29596	2.85965	0.0908271	-0.0497116	0.010215	0.00230933	0.106083
Dmxl1	-0.0384401	4.16705	0.183127	0.6687	0.014286	4.16705	0.025221	0.873818	0.0127562	0.0161291	0.682735	0.88032
Dmxl2	0.0305683	5.64008	0.287323	0.591941	0.0219708	5.64008	0.148283	0.700181	-0.0128457	-0.000989142	0.608715	0.714535
Dna2	0.115297	5.93073	3.53757	0.0599932	0.00335466	5.93073	0.00300823	0.95626	-0.039521	0.00967391	0.0719579	0.958566
Dnaaf2	0.82614	3.10628	8.51406	0.00352413	-0.110229	3.10628	0.149772	0.698754	-0.242928	-0.0814332	0.00500355	0.713339
Dnaja1	7.15578	5.14322	2481.08	0	0.0414125	5.14322	0.0298157	0.862909	-0.987193	-0.000311211	0	0.870114
Dnaja2	-0.00122473	5.73371	0.000434121	0.983377	-0.0632441	5.73371	1.17186	0.27902	-0.00116243	-0.0262567	0.984183	0.301777
Dnaja3	0.00867244	5.73988	0.0217781	0.882679	-0.0303305	5.73988	0.266253	0.605857	-0.00392262	-0.00199071	0.887232	0.623413
Dnaja4	-0.562979	2.8364	14.5399	0.000137222	-0.134881	2.8364	0.832689	0.361496	0.189553	-0.0282546	0.000230933	0.384159
Dnajb1	-0.152395	4.02248	3.50105	0.0613298	0.0139354	4.02248	0.0293705	0.863926	0.0472814	-0.0176629	0.0735177	0.871058
Dnajb11	0.137481	8.08221	15.9219	6.60103e-05	-0.0246504	8.08221	0.511921	0.474309	-0.0482769	-0.0113275	0.000129647	0.495793
Dnajb12	-0.151198	6.01548	6.52388	0.0106436	0.0127852	6.01548	0.0466053	0.829079	0.0522893	0.0281846	0.0143057	0.838323
Dnajb14	-0.0541655	5.53956	0.868837	0.351278	0.0159913	5.53956	0.0757979	0.783075	0.0190038	0.0224638	0.37482	0.795009
Dnajb2	0.03103	5.71545	0.252936	0.615015	-0.0315787	5.71545	0.261732	0.608933	-0.0123588	0.00996987	0.630909	0.626347
Dnajb3	-2.32706	4.4029	560.349	7.05947e-124	-0.0416241	4.4029	0.171554	0.678734	0.662521	-0.0217681	0	0.694075
Dnajb4	0.353046	5.32857	21.985	2.74793e-06	-0.0588933	5.32857	0.612191	0.433964	-0.122489	-0.0442846	4.05145e-06	0.456704
Dnajb5	0.173334	3.46277	1.88347	0.169941	-0.155842	3.46277	1.51863	0.217827	-0.0643384	0.0298407	0.189207	0.24015
Dnajc10	0.878395	5.86588	121.91	2.41549e-28	-0.0970256	5.86588	1.49828	0.220936	-0.293088	-0.0330541	0	0.243221
Dnajc12	0.169326	4.14333	3.003	0.0831104	0.108371	4.14333	1.23048	0.267313	-0.0570553	0.0111929	0.0974577	0.289995
Dnajc13	-0.0730346	5.41346	1.01435	0.313863	-0.0503443	5.41346	0.482228	0.487415	0.0242564	-0.00680834	0.337049	0.508632
Dnajc14	0.244604	7.0981	50.3374	1.29459e-12	-0.0439477	7.0981	1.62516	0.202374	-0.085378	0.00884498	0	0.224718
Dnajc17	0.0960634	4.07588	0.636701	0.424908	0.131907	4.07588	1.19947	0.273427	-0.0321752	0.00450202	0.446766	0.295942
Dnajc19	-5.40204	5.44118	2233.2	0	0.298795	5.44118	5.27098	0.0216838	0.953512	0.0080074	0	0.0281373
Dnajc2	-0.0873151	3.47846	0.465	0.495296	-0.116936	3.47846	0.830632	0.36209	0.0351485	0.0311697	0.516358	0.384795
Dnajc22	0.113296	5.94001	3.91365	0.0478954	-0.14828	5.94001	6.70256	0.00962744	-0.0422778	-0.00278577	0.0585192	0.0129322
Dnajc24	0.0461452	3.04473	0.093742	0.759473	0.0143985	3.04473	0.00904071	0.924249	-0.01912	0.018529	0.769067	0.927763
Dnajc25	-0.219294	5.11274	9.44241	0.00212025	0.0246419	5.11274	0.118826	0.730311	0.0761482	-0.0186474	0.00312772	0.743531
Dnajc7	0.0318975	5.07175	0.179308	0.671969	0.055903	5.07175	0.549853	0.458378	-0.0128587	0.0275685	0.685899	0.480085
Dnajc8	-0.0447606	6.25111	0.457428	0.498828	-0.171523	6.25111	6.71544	0.00955816	0.0133213	-0.00412528	0.519607	0.0128553
Dnase2a	-0.18611	2.22844	0.868434	0.351389	-0.13349	2.22844	0.445119	0.504662	0.0678816	0.0549427	0.374889	0.525328
Dnase2b	0.340421	5.17461	17.7777	2.48277e-05	0.0210424	5.17461	0.0680463	0.794203	-0.115996	-0.021336	7.29262e-05	0.805263
Dnhd1	-0.568986	4.58945	46.9477	7.2905e-12	-0.129968	4.58945	2.44744	0.117716	0.190743	-0.0391116	0	0.135274
Dnmt3a	0.137573	3.2577	1.06662	0.301709	-0.0713788	3.2577	0.287043	0.592122	-0.0506752	0.0140774	0.325145	0.610161
Dnpep	0.069066	5.34577	0.792487	0.373349	-0.127767	5.34577	2.71163	0.0996193	-0.024383	-0.00575133	0.395973	0.115616
Dntt	0.169132	4.22998	1.92889	0.16488	-0.059038	4.22998	0.235357	0.62758	-0.0474491	0.0794571	0.183835	0.644457
Dnttip2	0.11239	3.92871	1.15804	0.281873	-0.0514539	3.92871	0.242838	0.622164	-0.0415854	0.00870104	0.3052	0.63923
Dock1	0.133818	6.51494	8.42464	0.00370169	0.0224781	6.51494	0.237635	0.625919	-0.0463285	0.00122085	0.00526689	0.642816
Dock10	-0.118264	5.00049	1.40049	0.236641	0.125227	5.00049	1.57317	0.209747	0.0359388	0.0137311	0.258722	0.232055
Dock4	0.267659	4.74982	7.65212	0.00567057	0.084159	4.74982	0.756356	0.384471	-0.0941202	-0.0282733	0.00774638	0.406843
Dock5	9.46521	3.96567	1464.37	0	0.0151859	3.96567	1.70537e-11	0.999997	-1	0	0	0.999733
Dock7	-0.139505	3.56266	1.18129	0.277093	0.132757	3.56266	1.0742	0.299998	0.0349833	0.0106388	0.300282	0.323039
Dock8	0.687056	6.24274	129.377	5.60824e-30	0.0478759	6.24274	0.630129	0.427308	-0.233227	-0.00374558	0	0.449772
Dock9	-0.105532	6.07256	3.18035	0.0745289	0.0728736	6.07256	1.51661	0.218132	0.0348532	0.0179355	0.0882082	0.240377
Dom3z	-0.253633	3.68661	4.62152	0.0315732	0.00015672	3.68661	6.41763e-06	0.997979	0.0928131	-0.0602421	0.0394976	0.998072
Dopey1	0.626514	5.19804	91.9801	8.7552e-22	0.0686376	5.19804	1.1032	0.293565	-0.21318	0.00994751	0	0.316273
Dpagt1	0.0648873	5.53088	0.819512	0.365323	-0.0437041	5.53088	0.371894	0.541974	-0.0232892	-0.000223211	0.388226	0.561572
Dpep1	2.34621	3.15305	64.0907	1.1882e-15	-0.448847	3.15305	2.41628	0.12008	-0.597345	0.0264335	0	0.137867
Dpf2	-0.364957	4.53997	14.2779	0.000157707	-0.0702644	4.53997	0.52987	0.466662	0.118709	-0.0391675	0.000263344	0.488374
Dph1	0.286325	2.63558	4.7608	0.0291151	-0.0599224	2.63558	0.212538	0.644786	-0.0856336	0.0305156	0.0365239	0.661076
Dpy19l1	-0.0739432	7.38093	5.37318	0.0204487	-0.0127476	7.38093	0.159711	0.689423	0.0252141	-0.00560805	0.0260427	0.70441
Dpys	0.100583	7.72768	6.21312	0.0126807	-0.00355284	7.72768	0.0077495	0.929852	-0.0348856	0.0170407	0.0167892	0.933151
Dqx1	0.127337	3.56609	1.32812	0.249141	-0.148334	3.56609	1.79722	0.180049	-0.0512609	-0.0309693	0.271516	0.202277
Dram1	2.52539	3.69258	310.436	1.75448e-69	-0.23906	3.69258	2.76279	0.0964799	-0.702984	-0.00479435	0	0.112011
Dsc2	-0.22334	6.45666	19.0123	1.2988e-05	0.0307393	6.45666	0.360186	0.548403	0.0786984	0.0219704	2.43087e-05	0.567779
Dscr3	0.0229298	4.70408	0.139637	0.708643	-0.0530706	4.70408	0.74836	0.386996	-0.00694355	-0.026074	0.721252	0.409448
Dsg1c	-0.203264	5.04148	7.66215	0.00563912	0.010303	5.04148	0.0199603	0.887648	0.0725359	0.00195479	0.00770181	0.893475
Dsg2	-0.109515	6.63441	5.90527	0.0150957	0.0549356	6.63441	1.48584	0.222863	0.0377435	0.00565291	0.0197751	0.245182
Dsp	0.260574	6.50463	17.9855	2.226e-05	-0.00523045	6.50463	0.00725346	0.932128	-0.090413	-0.0124641	5.67203e-05	0.935497
Dstn	0.308834	5.5462	15.6832	7.48853e-05	-0.104732	5.5462	1.80554	0.179044	-0.105995	-0.0159698	0.000137749	0.201199
Dtd1	-0.125788	3.07652	0.687674	0.406957	0.0157842	3.07652	0.0104084	0.91874	0.051808	-0.0573557	0.429304	0.922346
Dtd2	0.0275876	4.7446	0.0992545	0.752726	0.0668745	4.7446	0.582783	0.445224	-0.011071	-0.0557464	0.762966	0.467465
Dtnb	-0.165346	4.70981	2.34211	0.125919	0.104344	4.70981	0.933477	0.333961	0.0582197	-0.049086	0.143442	0.356828
Dtwd2	-7.81051	3.04157	805.52	3.40423e-177	-0.648127	3.04157	3.87757	0.0489353	0.995799	-0.00148036	0	0.0593497
Dtx2	-0.404978	3.46754	8.73543	0.00312086	0.0720507	3.46754	0.277089	0.598616	0.128962	-0.02952	0.00442014	0.616303
Dtx3	0.425906	2.88732	5.03209	0.0248818	0.238684	2.88732	1.58	0.208761	-0.138177	0.0576755	0.0313137	0.231115
Dtx3l	-0.109415	6.0457	4.69425	0.0302636	-0.0255858	6.0457	0.256668	0.612419	0.0370901	-0.0270978	0.0379054	0.62975
Dusp1	0.236853	3.39707	4.96527	0.0258613	-0.0998153	3.39707	0.880629	0.34803	-0.0803425	0.0432028	0.0325372	0.370915
Dusp12	-0.345781	5.50529	27.7077	1.411e-07	0.16826	5.50529	6.56668	0.0103905	0.115766	0.0135491	0	0.0142206
DUSP12	-0.408569	3.68489	15.3651	8.86086e-05	0.249867	3.68489	5.748	0.0165074	0.136922	0.0138721	0.000162058	0.0216469
Dusp16	-0.379102	6.47744	81.2542	1.98471e-19	-0.00273573	6.47744	0.00423794	0.948095	0.128437	-0.00634418	0	0.951079
Dusp19	1.11998	4.52821	121.327	3.2403e-28	0.0498362	4.52821	0.241912	0.622829	-0.364345	-0.0209955	0	0.639854
Dusp3	-0.416388	3.29729	12.6907	0.000367476	0.185044	3.29729	2.50377	0.113574	0.143857	0.0817143	0.000632027	0.130607
Dusp6	-0.199289	8.31308	21.7086	3.17364e-06	-0.0270723	8.31308	0.400879	0.526636	0.0676559	-0.0165298	4.05145e-06	0.546788
Dvl1	0.0245882	7.32876	0.519758	0.470945	0.0383104	7.32876	1.26173	0.261323	-0.00887074	0.00279562	0.49247	0.283885
Dvl2	0.0852652	6.85527	3.59503	0.0579524	-0.000889255	6.85527	0.000390927	0.984225	-0.0292755	0.0184889	0.0695999	0.984815
Dym	-0.271564	4.26322	5.18555	0.0227755	-0.00766243	4.26322	0.00408649	0.949029	0.0938108	-0.0318022	0.028818	0.951788
Dync1h1	-0.00266671	8.5456	0.008722	0.925592	0.00126909	8.5456	0.00197579	0.964546	0.000313489	0.00607771	0.928962	0.966296
Dynll2	-0.0576288	6.23468	1.32946	0.248901	-0.0216196	6.23468	0.187153	0.665297	0.0192512	0.0150523	0.271285	0.681191
Dynlrb1	-0.0826501	7.06821	4.01874	0.0449973	0.0416768	7.06821	1.02197	0.312052	0.0282231	0.0105665	0.0552456	0.335063
Dyrk2	0.301743	5.75525	30.0506	4.20927e-08	-0.0095702	5.75525	0.0301875	0.862065	-0.104559	0.0175438	0	0.869328
E030018B13Rik	0.165699	3.57853	1.17025	0.27935	0.106089	3.57853	0.481404	0.487787	-0.0460558	-0.0226116	0.302457	0.508972
E030042O20Rik	-1.49879	3.05353	100.514	1.17572e-23	0.19018	3.05353	1.63851	0.20053	0.472836	0.0700366	0	0.222777
E130208F15Rik	0.138035	5.50395	4.75547	0.0292053	0.000979423	5.50395	0.000240605	0.987624	-0.0480539	0.0053794	0.0366292	0.988255
E230015J15Rik	0.265795	6.6816	16.1327	5.90556e-05	-0.0684234	6.6816	1.06749	0.301512	-0.0985622	0.0171606	0.000121544	0.324712
E2f1	-2.15319	2.84583	52.4041	4.51771e-13	0.00107025	2.84583	4.73197e-05	0.994511	0.567302	0.0288335	0	0.994879
E2f5	-0.0347345	3.55893	0.0843579	0.771476	0.025274	3.55893	0.0449929	0.832017	0.0115456	-0.00982617	0.780294	0.840985
E2f7	3.86104	4.68835	758.751	5.01982e-167	-0.113349	4.68835	0.630153	0.427299	-0.869329	-0.00926513	0	0.44976
E430024P14Rik	4.39427	2.61189	286.632	2.69364e-64	0.156334	2.61189	0.258897	0.610879	-0.907473	0.0022564	0	0.62817
E430025E21Rik	-0.018832	4.04747	0.0304505	0.861472	0.211468	4.04747	3.8524	0.0496748	0.00584158	0.0555421	0.866553	0.0602613
E4f1	-0.00239801	2.35442	0.000361947	0.984821	0.244966	2.35442	3.67724	0.0551602	0.0112882	0.0832284	0.985581	0.066537
Ebag9	-0.0296734	5.2294	0.163543	0.685916	0.128959	5.2294	3.08427	0.0790526	0.0108008	0.0524811	0.69939	0.0932564
Echdc3	-0.255523	2.42195	2.49984	0.113858	0.124485	2.42195	0.596883	0.43977	0.0902025	0.0468265	0.130692	0.462315
Echs1	0.100965	6.94383	6.64151	0.00996292	0.031753	6.94383	0.656897	0.417657	-0.0352857	0.00156027	0.013382	0.440097
Eci1	0.633243	7.24256	132.787	1.00638e-30	-0.0372643	7.24256	0.462091	0.496648	-0.21677	0.0373973	0	0.517768
Ecm1	-0.0672321	5.28414	1.08778	0.296964	0.11127	5.28414	2.98007	0.0842956	0.0235332	0.0265284	0.32032	0.0990621
Edem2	-0.120846	5.94359	7.88803	0.0049763	0.0326696	5.94359	0.576424	0.447717	0.0411586	0.0200784	0.00689963	0.469754
Edem3	-0.224404	7.55709	29.6604	5.14766e-08	0.010484	7.55709	0.0648059	0.799055	0.0763952	0.0148368	0	0.810011
Eed	0.189582	4.06995	2.55397	0.110018	-0.0353851	4.06995	0.0888536	0.76564	-0.0653583	-0.0904707	0.126442	0.778142
Eef1a1	-3.48944	12.6582	16335	0	-0.000722696	12.6582	0.000839186	0.97689	0.835838	0.00336782	0	0.977928
Eef1e1	0.684811	5.09494	87.8013	7.23709e-21	0.000580192	5.09494	6.28617e-05	0.993674	-0.229354	0.0225333	0	0.994065
Eef1g	0.212966	6.37382	20.1493	7.16264e-06	-0.0283782	6.37382	0.357701	0.549786	-0.0733641	-0.00579179	8.10291e-06	0.569116
Efcab14	0.359162	5.26215	30.4312	3.45919e-08	-0.0232322	5.26215	0.127462	0.721078	-0.12354	-0.0107494	0	0.734557
Efcc1	-0.864196	2.70884	28.3998	9.86768e-08	0.245339	2.70884	2.28277	0.130818	0.291453	0.0109983	0	0.149628
Efemp1	-0.175401	3.50579	1.3197	0.250647	0.087755	3.50579	0.330262	0.565505	0.0665414	-0.020285	0.273104	0.584754
Efr3a	-0.0999003	6.24611	2.62696	0.105063	-0.0598184	6.24611	0.941936	0.33178	0.0336626	-0.0385688	0.121175	0.354774
Eftud1	0.366391	3.76276	10.6074	0.00112637	0.0931317	3.76276	0.684569	0.408018	-0.127611	0.0215474	0.00177049	0.430698
Eftud2	0.0230091	4.98919	0.0885791	0.765991	-0.0727788	4.98919	0.885392	0.346729	-0.0112757	-0.0106588	0.775108	0.369549
Egfem1	-0.781596	2.63528	18.3096	1.87759e-05	0.456404	2.63528	6.2803	0.0122087	0.245352	0.0655068	4.86174e-05	0.0165178
Egfr	0.266494	8.9812	24.4485	7.63237e-07	-0.0442954	8.9812	0.675556	0.411121	-0.0957492	0.0299943	4.05145e-06	0.433692
Egln1	-0.708998	3.17188	34.1726	5.04343e-09	0.0909668	3.17188	0.559712	0.454376	0.239274	0.0332878	0	0.476419
Egr1	0.00590523	5.36285	0.0113821	0.915037	-0.0111336	5.36285	0.040384	0.840732	-0.013002	0.0112692	0.918509	0.849335
Ehbp1	0.244274	4.50593	0.954316	0.328623	-0.0703347	4.50593	0.0792631	0.778299	-0.0741798	0.0391974	0.352043	0.790463
Ehbp1l1	0.300472	4.36997	7.97506	0.00474263	-0.084139	4.36997	0.626019	0.428819	-0.103361	0.00518713	0.00656741	0.451271
Ehd3	-0.224346	6.15633	23.1233	1.51941e-06	-0.0309728	6.15633	0.440992	0.506644	0.0766348	-0.0100949	4.05145e-06	0.527122
Ehhadh	0.179891	7.63197	24.4189	7.75046e-07	-0.0161034	7.63197	0.195738	0.658183	-0.0621198	-0.0134952	4.05145e-06	0.674608
Ehmt2	0.0611982	6.84163	1.98641	0.158717	0.0549638	6.84163	1.60231	0.205575	-0.0209007	-0.00303587	0.177758	0.227846
Ei24	-0.350099	8.12447	166.321	4.70647e-38	0.00763056	8.12447	0.0790809	0.778547	0.120408	-0.00511299	0	0.790686
Eif1b	0.243528	4.8064	9.83526	0.00171198	0.0811038	4.8064	1.09112	0.296224	-0.0835099	0.0101886	0.00256457	0.319036
Eif2ak3	0.00738111	4.3845	0.00937577	0.922863	0.106359	4.3845	1.95475	0.162075	-0.00419559	0.0118608	0.926203	0.1833
Eif2ak4	0.0370751	5.66314	0.311158	0.576971	-0.0775331	5.66314	1.36021	0.243501	-0.0133323	0.0188408	0.594413	0.265488
Eif2b1	0.292146	5.30668	21.9652	2.77634e-06	-0.0314671	5.30668	0.254872	0.613665	-0.101686	0.00195946	4.05145e-06	0.630937
Eif2b3	0.0636728	4.18945	0.510117	0.475088	0.0667566	4.18945	0.560871	0.45391	-0.0222969	0.023436	0.496761	0.476013
Eif2b5	0.0690273	6.15869	1.61039	0.204436	0.0454825	6.15869	0.699236	0.403041	-0.0235828	0.000374281	0.225403	0.425824
Eif2d	0.051575	4.17782	0.200444	0.654363	-0.023273	4.17782	0.0406528	0.84021	-0.0223911	0.0641475	0.668717	0.848856
Eif2s1	-7.91013	4.24423	1669.73	0	0.535344	4.24423	2.53377	0.111433	0.99421	0.00333922	0	0.128387
Eif2s2	-1.32162	5.13452	47.305	6.07576e-12	0.0691444	5.13452	0.132145	0.716218	0.403311	-0.018233	0	0.729979
Eif3a	5.42924	2.85367	534.374	3.15769e-118	-0.487063	2.85367	2.91822	0.0875842	-0.958591	-0.0122422	0	0.102563
Eif3e	0.189564	8.70955	44.9666	2.00426e-11	0.0304093	8.70955	1.15762	0.281961	-0.0655214	-0.0166888	0	0.304771
Eif3f	0.260207	5.82121	18.212	1.97628e-05	0.144562	5.82121	5.62384	0.0177178	-0.0870137	-0.010858	5.26689e-05	0.0232229
Eif3h	0.30899	7.51606	76.2398	2.51228e-18	-0.0206949	7.51606	0.342118	0.558609	-0.106754	0.00242965	0	0.577916
Eif3i	0.00323089	7.09681	0.00698713	0.933383	0.0216391	7.09681	0.313285	0.575671	-0.00156307	0.0105437	0.936615	0.594364
Eif3j1	0.0198788	5.52284	0.0857173	0.769694	-0.0380083	5.52284	0.313515	0.575531	-0.0081248	0.0240415	0.778531	0.594227
Eif3m	-0.256032	5.29479	7.44286	0.00636886	0.109072	5.29479	1.35187	0.244951	0.0870888	0.0336285	0.00862554	0.266975
Eif4a-ps4	-3.18641	4.98449	1167.05	8.83478e-256	-0.0579711	4.98449	0.367336	0.54446	0.79773	-0.0141659	0	0.563926
Eif4a1	0.606305	8.98903	299.929	3.41416e-67	0.0346864	8.98903	0.986924	0.320495	-0.207205	0.00829885	0	0.343539
Eif4a2	-0.0171013	8.07384	0.258868	0.610899	0.0459859	8.07384	1.87165	0.171286	0.00573137	0.018934	0.627031	0.193161
Eif4e	2.63742	6.31381	1618.91	0	-0.00338446	6.31381	0.00284724	0.957445	-0.721365	-0.0170472	0	0.959639
Eif4e2	-0.0767933	5.79315	2.25911	0.132831	0.00276636	5.79315	0.00293115	0.956824	0.0272435	0.000510031	0.15073	0.959097
Eif4ebp2	-0.290277	2.63911	3.42425	0.0642454	-0.154396	2.63911	0.973517	0.323805	0.0941374	-0.00230183	0.0766697	0.346845
Eif4ebp3	-0.0213528	5.05732	0.0736525	0.786091	0.112823	5.05732	2.05799	0.15141	0.00858264	0.0465759	0.794608	0.171936
Eif4g1	-0.535627	8.41632	217.017	4.04713e-49	0.0294889	8.41632	0.660172	0.416499	0.183285	-0.00329336	0	0.439052
Eif4g2	-0.0675201	7.67182	3.82262	0.0505652	-0.0238632	7.67182	0.477496	0.489559	0.0221899	0.00699027	0.0614322	0.510779
Eif4g3	0.192025	4.32529	4.03813	0.044483	-0.0159539	4.32529	0.0279094	0.867322	-0.0643881	-0.00115135	0.054569	0.874133
Eif4h	0.0532847	7.9736	1.99718	0.157593	-0.0234007	7.9736	0.385147	0.534861	-0.0198293	0.00723722	0.17655	0.554794
Eif6	0.0770847	7.32567	3.94805	0.0469258	0.00891167	7.32567	0.0527813	0.818292	-0.0265798	-0.00605726	0.0574131	0.828267
Elac1	-0.162455	3.59067	2.10705	0.146622	0.0671166	3.59067	0.359672	0.548689	0.0545955	-0.0211581	0.16489	0.567977
Elac2	-0.474083	4.20435	19.5292	9.9074e-06	0.0475751	4.20435	0.196349	0.657684	0.157935	0.0261437	1.62058e-05	0.674129
Elf2	0.398487	4.63565	25.6483	4.09651e-07	0.131671	4.63565	2.79946	0.0942962	-0.133542	0.00299374	4.05145e-06	0.109766
Elf5	-2.23923	2.42772	62.1978	3.10635e-15	-0.327129	2.42772	1.34343	0.246429	0.603649	-0.109692	0	0.268514
Elk3	0.0640352	4.50766	0.801551	0.37063	0.0150305	4.50766	0.0441569	0.833562	-0.0209449	-0.0205349	0.393303	0.842431
Elk4	0.00833275	5.81242	0.0268453	0.869853	-0.0566735	5.81242	1.24254	0.264981	-0.00252519	-0.0196488	0.874563	0.287609
Elmod2	0.0303722	6.59144	0.614972	0.432922	-0.0531683	6.59144	1.88441	0.169833	-0.012469	-0.0145225	0.454747	0.191662
Elmsan1	-0.230593	2.74814	2.01818	0.155426	-0.151018	2.74814	0.86253	0.353032	0.0786593	0.0233651	0.1742	0.376019
Elovl1	0.0534083	4.7043	0.408453	0.522756	-0.0451855	4.7043	0.292925	0.588352	-0.0177839	-0.00592889	0.542482	0.606584
Elovl5	-0.0265963	10.1485	0.809494	0.36827	-0.0364956	10.1485	1.52435	0.216963	0.0084318	-0.0104411	0.390941	0.239149
Elp2	0.0387759	3.38346	0.0663628	0.796708	0.094562	3.38346	0.393265	0.530588	-0.0196516	-0.0724035	0.805226	0.550584
Elp4	-0.0483605	4.21969	0.246877	0.619283	-0.0487795	4.21969	0.251995	0.615674	0.0143867	-0.0575062	0.635203	0.632861
Elp5	-0.0829114	5.82706	2.02947	0.154274	-0.0214184	5.82706	0.135539	0.712757	0.028421	-0.00968764	0.173025	0.726636
Eltd1	0.210934	5.55307	9.01548	0.00267702	-0.0522715	5.55307	0.553249	0.456993	-0.0745113	0.0431801	0.00392181	0.478781
Emc1	0.304571	3.71817	5.43658	0.0197193	0.0320584	3.71817	0.0596401	0.807066	-0.0993139	0.0135408	0.0251879	0.817446
Emc10	0.534531	7.95222	282.949	1.70982e-63	0.00110314	7.95222	0.00121767	0.972163	-0.182641	0.00498718	0	0.973512
Emc2	0.221122	5.2924	10.8473	0.000989407	-0.0244441	5.2924	0.132724	0.715624	-0.0767854	0.00565675	0.00155981	0.729359
Emc4	0.173655	2.64229	1.14556	0.284481	0.143726	2.64229	0.784417	0.375794	-0.0548758	0.0131075	0.307943	0.398165
Emcn	-0.155162	2.38038	0.430148	0.511916	0.0726581	2.38038	0.0946803	0.758309	0.0605035	0.107756	0.53215	0.771016
Eme1	-0.0167042	5.66289	0.107525	0.74298	-0.0339547	5.66289	0.444733	0.504847	0.00509588	-0.00560206	0.753801	0.525498
Eme2	0.393994	6.38094	74.1781	7.13768e-18	-0.0181688	6.38094	0.157844	0.69115	-0.136358	-0.0130703	0	0.706051
Eml1	0.182835	2.82667	1.76731	0.183715	-0.275175	2.82667	3.99872	0.0455348	-0.0708616	0.0193839	0.203829	0.0557156
Eml5	6.86043	2.63774	614.521	1.16269e-135	-0.0800779	2.63774	0.113296	0.736423	-0.991561	-0.00108481	0	0.749426
Eml6	1.15002	2.75523	24.9947	5.74875e-07	0.0252908	2.75523	0.00801853	0.928648	-0.354609	-0.115837	4.05145e-06	0.932013
Emp1	-0.0466293	2.63511	0.0817625	0.774923	-0.0410534	2.63511	0.0641602	0.800037	0.021033	0.00212361	0.783774	0.810825
Enc1	0.0796675	3.94636	0.601898	0.437855	-0.057872	3.94636	0.318252	0.57266	-0.0402403	-0.030807	0.459678	0.591573
Eno1	1.91608	6.34933	1310.32	6.46008e-287	0.00753996	6.34933	0.0203114	0.886671	-0.579454	-0.00181059	0	0.892657
Eno3	-0.793707	2.92071	16.1489	5.85533e-05	0.217999	2.92071	1.22253	0.268865	0.260872	0.0835097	0.000121544	0.29153
Enpep	-0.189987	8.39382	13.3432	0.000259363	-0.02559	8.39382	0.242115	0.622683	0.0656703	0.0117294	0.000449711	0.63972
Enpp1	0.920644	7.05654	268.709	2.16933e-60	-0.0199782	7.05654	0.127492	0.721047	-0.306339	0.00697943	0	0.73452
Enpp2	0.167566	6.49636	5.20532	0.0225179	-0.12451	6.49636	2.87291	0.0900818	-0.0592684	0.00644043	0.0285344	0.1052
Enpp3	0.257826	5.75729	13.4139	0.000249769	0.0401537	5.75729	0.324738	0.568774	-0.0899959	0.0145584	0.000433506	0.587906
Enpp4	0.259727	2.77243	3.29898	0.0693228	0.0108734	2.77243	0.00582171	0.93918	-0.093609	0.0319527	0.082366	0.942396
Enpp5	-4.04715	3.12137	498.223	2.31533e-110	-0.420811	3.12137	4.36349	0.0367169	0.8837	0.00672182	0	0.0453844
Ep300	-0.0191558	4.55536	0.0452213	0.831598	-0.0997569	4.55536	1.22739	0.267914	0.00511081	-0.0197094	0.837926	0.290663
Epas1	1.45279	6.01613	353.283	8.1695e-79	0.0083973	6.01613	0.0120704	0.912516	-0.458667	0.0360097	0	0.916625
Epb4.1	0.0644477	8.53154	4.10666	0.0427146	-0.0142796	8.53154	0.201623	0.653414	-0.0227833	-0.000845385	0.0523974	0.669969
Epb4.1l1	0.56429	3.76178	23.2219	1.44341e-06	0.157208	3.76178	1.80508	0.1791	-0.189576	-0.0351168	4.05145e-06	0.201256
Epb4.1l2	-0.109019	3.60134	0.63783	0.424498	0.155053	3.60134	1.29134	0.255801	0.0367068	0.065825	0.446353	0.278031
Epc1	-0.102484	3.54653	0.612915	0.433692	0.0539663	3.54653	0.168912	0.68108	0.0378911	-0.0500661	0.455545	0.696421
Ephx1	-0.160608	7.05751	9.88723	0.0016643	0.0614768	7.05751	1.4486	0.228752	0.0599372	0.0259551	0.00249164	0.250988
Epm2aip1	0.155288	3.26593	1.79349	0.180501	-0.0713194	3.26593	0.380317	0.537434	-0.0603483	-0.103952	0.200292	0.55718
Epn1	-0.00429417	5.63535	0.00430376	0.947694	0.00530565	5.63535	0.00659955	0.935253	0.000875746	0.00387305	0.950629	0.938564
Eprs	-0.184519	9.24726	46.4925	9.19699e-12	0.000226432	9.24726	6.99777e-05	0.993326	0.0631125	0.00797636	0	0.993724
Eps15	-7.0691	2.25324	508.843	1.13212e-112	0.64606	2.25324	3.17449	0.0747964	0.995833	-0.00416667	0	0.0884392
Ept1	2.21044	2.84357	228.614	1.19581e-51	-0.0675903	2.84357	0.189468	0.663359	-0.643597	0.0096581	0	0.679421
Eral1	-0.0357154	3.71455	0.0967291	0.755791	0.052756	3.71455	0.210625	0.646278	0.0156051	-0.0248052	0.765871	0.662631
Erbb2ip	-0.137839	6.1145	5.9152	0.0150108	-0.058508	6.1145	1.06601	0.301848	0.0465567	-0.00986215	0.0196536	0.325064
Erbb3	0.00322747	9.78129	0.0161877	0.898758	0.0293933	9.78129	1.34258	0.246579	-0.00135011	-0.00104665	0.903178	0.268672
Erc1	0.332819	6.33773	52.4497	4.41401e-13	0.0403741	6.33773	0.772062	0.37958	-0.114833	0.0232806	0	0.401945
Ercc1	1.37142	2.72411	46.9534	7.26962e-12	0.0312463	2.72411	0.0216821	0.882936	-0.42753	0.0184104	0	0.888933
Ercc2	0.17109	2.77587	1.45566	0.227621	-0.167708	2.77587	1.39934	0.236835	-0.0527102	-0.0937301	0.249484	0.258957
Ercc6l2	-0.00506744	4.21758	0.00277284	0.958005	-0.00417959	4.21758	0.00187892	0.965425	0.000549335	0.00307945	0.960405	0.967098
Erf	-0.0423091	4.29745	0.241554	0.623086	0.0341358	4.29745	0.157176	0.69177	0.015598	0.010651	0.638943	0.706557
Ergic1	0.321533	8.54885	110.609	7.20751e-26	0.00362152	8.54885	0.0140426	0.90567	-0.111151	-0.000128887	0	0.910507
Ergic3	0.010452	6.55621	0.0867005	0.768414	0.00830698	6.55621	0.0547642	0.814971	-0.00456445	0.00861397	0.777308	0.824937
Erich1	-0.0143965	2.58124	0.0146712	0.903592	-0.0991268	2.58124	0.686978	0.407194	-0.0060808	0.0311354	0.907805	0.429855
Erlin2	-0.0417561	6.03085	0.566962	0.451469	0.0899115	6.03085	2.6281	0.104987	0.0150632	0.00702519	0.473117	0.12156
Ern1	-0.075042	6.76941	3.0082	0.0828445	-0.0942503	6.76941	4.74591	0.029368	0.0251253	-0.0145478	0.0971579	0.0371235
Ero1l	0.0530877	3.91145	0.175291	0.675452	-0.136998	3.91145	1.1656	0.280308	-0.019543	0.0587367	0.689201	0.303028
Ero1lb	10.4117	5.76342	429.235	2.3849e-95	-0.877453	5.76342	4.90735	0.0267426	-0.998135	-0.000224722	0	0.0341132
Erp44	-0.00707576	6.12083	0.0229656	0.879547	-0.00973222	6.12083	0.0434332	0.834912	0.00190635	0.00259812	0.884068	0.843744
Errfi1	-0.0369177	6.28386	0.91047	0.33999	0.0548649	6.28386	2.01123	0.156139	0.0119516	0.0255368	0.363496	0.176935
Esco1	-0.0912858	3.70489	0.847088	0.357378	-0.118639	3.70489	1.43031	0.231714	0.033095	-0.0256348	0.380671	0.253807
Esf1	0.0799651	4.13723	0.924479	0.336302	0.0800871	4.13723	0.926632	0.33574	-0.0256694	-0.000487798	0.35966	0.358582
Esyt1	-0.405316	6.96617	72.2266	1.91851e-17	-0.00452784	6.96617	0.00901373	0.924362	0.137961	0.0258802	0	0.927921
Esyt2	0.286246	3.40208	6.91384	0.00855309	-0.0212506	3.40208	0.0380754	0.845292	-0.0900932	0.0291954	0.0114616	0.853662
Etf1	0.0102762	4.99525	0.0208635	0.885151	0.100069	4.99525	1.97442	0.159979	-0.00567845	0.003526	0.88974	0.181007
Etfb	0.126659	9.31968	24.6175	6.99135e-07	-0.0147795	9.31968	0.335248	0.562585	-0.044279	-0.0106944	4.05145e-06	0.581801
Ethe1	-0.15262	7.41094	12.484	0.000410447	-0.023519	7.41094	0.296406	0.586144	0.0534484	-0.00825364	0.000700901	0.60457
Etnk1	0.0200842	8.41239	0.470899	0.492574	0.027513	8.41239	0.883721	0.347185	-0.00668119	-0.0166507	0.513728	0.369999
Etnk2	-3.88867	7.15063	3115.8	0	-0.018923	7.15063	0.0790767	0.778553	0.870998	0.00306202	0	0.79069
Etohd2	-0.061065	5.46884	1.83448	0.1756	-0.0106455	5.46884	0.0557208	0.813392	0.0206268	0.0132786	0.195211	0.823498
Etv5	-3.40996	4.63023	538.003	5.12745e-119	0.233669	4.63023	2.61687	0.105733	0.81926	0.00540512	0	0.122374
Etv6	-0.0160021	6.03821	0.0887868	0.765725	0.0144085	6.03821	0.071947	0.788523	0.0047524	-9.80884e-05	0.774865	0.799915
Eva1a	0.198876	6.91591	21.8675	2.92145e-06	0.0429891	6.91591	1.02197	0.312052	-0.069069	0.0234386	4.05145e-06	0.335063
Evi5	0.197819	4.50887	8.11924	0.0043798	0.0190691	4.50887	0.0754087	0.783619	-0.0672688	-0.0507926	0.00612175	0.795547
Exd1	0.306163	4.34586	12.3805	0.000433847	0.0208793	4.34586	0.0578918	0.80986	-0.105847	-0.0307589	0.000733313	0.820205
Exoc3	0.361833	6.25329	43.9949	3.29236e-11	-0.0583094	6.25329	1.1435	0.284914	-0.125405	-0.0306977	0	0.307728
Exoc3l2	0.000358031	3.68937	9.25855e-06	0.997572	-0.0733785	3.68937	0.518834	0.47134	-0.00139104	0.0166295	0.997853	0.4929
Exoc5	-0.221536	5.86553	15.385	8.76817e-05	-0.00629676	5.86553	0.0124044	0.911319	0.0765164	-0.0218547	0.000162058	0.915547
Exoc7	-0.0384223	6.27623	0.487447	0.485068	0.0168991	6.27623	0.0943131	0.758764	0.0127626	-0.00889006	0.506367	0.771462
Exoc8	0.332267	2.44636	3.69394	0.0546105	-0.048198	2.44636	0.0776428	0.780518	-0.109128	0.101299	0.0660468	0.792691
Exosc1	0.0497326	4.17754	0.384181	0.535374	-0.0344871	4.17754	0.184669	0.667391	-0.0152509	-0.0129295	0.55468	0.683071
Exosc5	0.354632	5.46386	36.0026	1.97053e-09	-0.0604152	5.46386	1.04482	0.306704	-0.124108	-0.00932418	0	0.329958
Exosc8	0.261716	2.70954	2.74224	0.0977276	0.0685662	2.70954	0.187299	0.665174	-0.0802888	0.0523375	0.11319	0.681049
Exosc9	-0.313575	4.84762	17.6654	2.63368e-05	-0.0489863	4.84762	0.430313	0.511835	0.110511	-0.0199343	7.29262e-05	0.53226
Exph5	0.0097809	3.84047	0.00635784	0.936447	0.047556	3.84047	0.151674	0.696941	-0.000438047	-0.0368408	0.939645	0.711557
Ext1	-0.0312285	5.64023	0.220347	0.638776	-0.0092366	5.64023	0.0192388	0.889684	0.00882216	0.0289462	0.65384	0.89546
Ext2	0.0945031	5.58982	1.99182	0.158151	0.0273256	5.58982	0.166534	0.683211	-0.0325551	-0.0150691	0.177142	0.698483
Extl2	-0.143811	4.04126	2.97987	0.0843062	-0.035526	4.04126	0.181885	0.669758	0.047781	-0.00899	0.0987947	0.685307
Eya3	-0.223754	6.4283	24.4283	7.71278e-07	-0.0500232	6.4283	1.22104	0.269156	0.0764004	0.00881666	4.05145e-06	0.291814
Ezr	-0.0594577	2.82543	0.0837175	0.772321	-0.22716	2.82543	1.23194	0.26703	0.0197359	-0.0655253	0.781072	0.289723
F10	0.21241	10.3648	68.2514	1.43923e-16	0.0135325	10.3648	0.277253	0.598508	-0.0739068	0.0029796	0	0.616198
F11r	0.113402	7.15615	4.86689	0.0273768	-0.0293231	7.15615	0.325508	0.568316	-0.0397131	0.00459094	0.0343968	0.587489
F12	0.475816	8.89355	206.799	6.85983e-47	0.0198586	8.89355	0.361356	0.547754	-0.163782	0.00751664	0	0.567167
F2r	0.196556	4.20891	5.23763	0.0221034	0.00933863	4.20891	0.0116316	0.914115	-0.0731513	-0.00887628	0.0280117	0.918153
F3	0.396189	4.63741	19.8002	8.59728e-06	0.100353	4.63741	1.27241	0.259315	-0.133079	0.0374179	1.21544e-05	0.281742
F5	0.0207567	9.73527	0.748498	0.386952	0.00869184	9.73527	0.131245	0.717145	-0.00751369	-0.00323486	0.409509	0.730842
F7	0.266057	8.19125	60.6353	6.86918e-15	0.0142096	8.19125	0.173185	0.677297	-0.0922078	-0.00100367	0	0.69273
F830016B08Rik	2.7495	5.36957	202.04	7.49211e-46	0.115896	5.36957	0.391604	0.531457	-0.693134	0.111348	0	0.551366
Fabp2	0.333124	8.73821	115.644	5.6879e-27	0.00104876	8.73821	0.001142	0.973042	-0.115377	-3.54224e-05	0	0.97435
Fabp5	-0.306942	5.21737	11.1032	0.000861774	0.0545776	5.21737	0.351373	0.553337	0.0946309	0.028186	0.00138155	0.572758
Fadd	0.0885874	4.69624	1.83936	0.175025	-0.0861675	4.69624	1.7402	0.187114	-0.0326813	-0.0134416	0.194599	0.209707
Fads1	-0.290981	8.71151	44.2684	2.86308e-11	-0.0808009	8.71151	3.41654	0.064546	0.0999155	0.00930133	0	0.0770181
Fads6	-0.425084	6.98935	137.352	1.00973e-31	0.0495669	6.98935	1.8684	0.171659	0.146826	0.0017743	0	0.193518
Fah	-0.0747017	10.569	9.326	0.00225925	0.0304837	10.569	1.55313	0.212674	0.0256387	0.00243207	0.00332624	0.234887
Fahd2a	0.254533	4.58716	8.74744	0.00310037	-0.129037	4.58716	2.24894	0.133706	-0.0899364	0.00231061	0.00438367	0.152801
Faim	-7.44365	3.85195	946.739	6.78657e-208	0.553386	3.85195	2.74461	0.0975826	0.99063	-0.00248922	0	0.113331
Fam102b	0.265755	2.90926	2.25626	0.133075	0.0553417	2.90926	0.0988153	0.753256	-0.0934108	-0.0606055	0.151026	0.765919
Fam103a1	-0.610795	5.42662	65.4742	5.88789e-16	0.0410442	5.42662	0.29605	0.586369	0.204982	0.0282419	0	0.604781
Fam104a	-0.15601	4.58492	4.06374	0.0438134	0.0303859	4.58492	0.153814	0.694917	0.0575491	-0.0466954	0.0537344	0.709624
Fam105a	-0.527067	3.74258	19.2499	1.14677e-05	-0.149057	3.74258	1.54033	0.214568	0.188419	0.0365835	1.62058e-05	0.236953
Fam107b	-0.404653	3.94985	18.2668	1.92027e-05	0.0524212	3.94985	0.308512	0.578595	0.142946	0.0259684	5.26689e-05	0.597136
Fam114a1	-8.53124	3.37033	1018.73	1.52609e-223	0.161901	3.37033	1.23563	0.266314	0.999034	0.000966184	0	0.289006
Fam114a2	-0.184487	4.23505	3.63778	0.0564823	-0.18973	4.23505	3.84721	0.0498288	0.0648631	-0.0367593	0.0679307	0.0604193
Fam117b	0.124955	3.38198	1.59513	0.206595	0.191725	3.38198	3.75942	0.0525107	-0.0360259	0.0163368	0.227542	0.0636564
Fam129a	0.0734736	5.14626	1.02487	0.311366	0.032072	5.14626	0.195202	0.658622	-0.031792	-0.00533864	0.334557	0.675013
Fam133b	-0.0144372	4.89525	0.0338145	0.854102	-0.080664	4.89525	1.05545	0.304255	0.00577168	-0.0357683	0.859532	0.327568
Fam134b	-2.42414	4.59362	691.902	1.72492e-152	-0.0871014	4.59362	0.868732	0.351307	0.690753	0.0246665	0	0.374334
Fam136a	0.11762	6.316	7.13474	0.00756045	0.036421	6.316	0.68401	0.408209	-0.0411846	-0.0145284	0.0102866	0.430868
Fam149b	-0.0625159	4.49326	0.355939	0.55077	0.111101	4.49326	1.12475	0.288898	0.0234107	-0.0845667	0.569424	0.31152
Fam151a	-1.66984	4.14243	156.594	6.27976e-36	0.0190989	4.14243	0.0220248	0.882021	0.522176	0.00556189	0	0.888212
Fam151b	0.321746	4.61901	9.51044	0.00204306	-0.0667811	4.61901	0.410918	0.521504	-0.108538	0.0249677	0.00301428	0.541773
Fam160a1	-0.210463	3.78013	4.23235	0.0396606	0.16437	3.78013	2.57946	0.108258	0.0783258	-0.00824049	0.0488079	0.125158
Fam160a2	0.0945875	2.52045	0.41961	0.517132	-0.101382	2.52045	0.480965	0.487986	-0.0305442	-0.0430817	0.537061	0.509179
Fam160b1	0.0566095	8.12627	3.0524	0.0806181	0.0153988	8.12627	0.225881	0.634595	-0.0196023	-0.00705406	0.0947959	0.651478
Fam162a	0.0672087	4.41005	0.635135	0.425478	0.126224	4.41005	2.24241	0.134272	-0.0180045	0.0354631	0.447289	0.153433
Fam167b	-0.269686	2.20425	1.87051	0.171416	0.302807	2.20425	2.35269	0.125067	0.0935412	-0.019415	0.190779	0.143292
Fam168a	0.0194633	4.97431	0.115203	0.734296	-0.0343388	4.97431	0.358634	0.549266	-0.00754848	-0.000170236	0.745313	0.568605
Fam169b	0.220788	5.76634	7.28596	0.00694955	-0.0301649	5.76634	0.136187	0.712101	-0.0733356	0.017035	0.00949661	0.726045
Fam171b	-0.865279	3.41609	61.8258	3.75224e-15	0.0518299	3.41609	0.218945	0.639845	0.291611	0.0113725	0	0.656441
Fam173b	0.841806	5.57367	147.954	4.85434e-34	0.0728828	5.57367	1.11264	0.291509	-0.281835	0.0317088	0	0.314117
Fam174b	0.897596	4.5101	102.389	4.56339e-24	0.0470984	4.5101	0.2829	0.594807	-0.29407	0.0269696	0	0.612596
Fam179b	0.323016	3.51685	6.16636	0.0130203	-0.127677	3.51685	0.965258	0.325866	-0.110176	-0.0199431	0.0172389	0.348887
Fam187b	-1.93843	3.04639	149.749	1.96726e-34	0.0451661	3.04639	0.0819652	0.774652	0.575355	-0.020877	0	0.786679
Fam193a	0.0283257	3.16824	0.053466	0.817138	-0.0249147	3.16824	0.0411583	0.839233	-0.00906311	-0.00596636	0.824844	0.847957
Fam195a	-0.145289	5.20565	3.76108	0.0524588	0.103902	5.20565	1.9221	0.165626	0.0505073	0.000561143	0.0636564	0.187108
Fam20b	-0.0718669	2.71613	0.3578	0.54973	-0.0511541	2.71613	0.180451	0.670986	0.0295611	0.00347455	0.568488	0.686527
Fam21	0.0474383	5.9973	0.538323	0.463129	0.0278119	5.9973	0.18504	0.667077	-0.0163798	0.0125914	0.484525	0.682775
Fam213a	1.85166	8.49775	1755.14	0	-0.0683054	8.49775	2.49782	0.114004	-0.565179	-0.00377535	0	0.131105
Fam213b	0.381139	4.58914	10.566	0.00115184	0.16164	4.58914	1.90537	0.167479	-0.127849	0.0470659	0.0018191	0.189045
Fam214a	-0.38088	6.14196	43.7494	3.73229e-11	0.0583961	6.14196	1.02919	0.310349	0.130906	0.011887	0	0.333483
Fam221b	-2.63152	2.72058	238.509	8.31307e-54	0.030821	2.72058	0.0267295	0.870131	0.724833	0.0429407	0	0.876905
Fam222b	0.123654	2.57185	0.75261	0.385651	0.202077	2.57185	2.01423	0.15583	-0.0456676	-0.0506865	0.408192	0.176664
Fam228b	-1.34983	2.5804	46.5571	8.89862e-12	-0.0879316	2.5804	0.177435	0.673587	0.419474	0.0416092	0	0.689091
Fam3c	-0.120306	5.52536	2.29027	0.130187	0.0656841	5.52536	0.682861	0.408603	0.0421792	0.00760467	0.147983	0.431237
Fam46a	0.0362813	4.97538	0.33984	0.559922	0.00511453	4.97538	0.0067631	0.934457	-0.0105108	-0.0222487	0.578146	0.937839
Fam46c	-0.221872	3.57157	3.40183	0.0651241	-0.000463354	3.57157	4.17566e-05	0.994844	0.0876336	-0.04365	0.0776785	0.995142
Fam49a	-0.241425	3.25616	3.5769	0.0585884	-0.136097	3.25616	1.13789	0.286099	0.0824926	0.0243194	0.0703656	0.308838
Fam53a	-0.119719	4.2695	2.12835	0.144597	-0.0840367	4.2695	1.04854	0.305845	0.0405189	-0.0311773	0.162747	0.32912
Fam57a	0.103174	2.75512	0.379573	0.537832	-0.343562	2.75512	4.18135	0.040871	-0.0320445	-0.0113177	0.556913	0.0503231
Fam58b	-0.888998	3.64957	75.9877	2.85439e-18	-0.0938265	3.64957	0.841758	0.358895	0.298386	0.0043493	0	0.381659
Fam65b	-0.49034	4.15685	4.1303	0.0421219	-0.411866	4.15685	2.92363	0.087291	0.138862	0.0403031	0.0517978	0.102255
Fam69a	-0.0751799	2.7571	0.426326	0.513797	0.122647	2.7571	1.13486	0.286741	0.0370523	0.0221106	0.533957	0.30941
Fam73a	-0.181244	2.61485	1.25847	0.261942	0.157201	2.61485	0.947011	0.330481	0.0608054	0.0191446	0.284489	0.353538
Fam76a	-0.278496	5.78451	21.4332	3.66373e-06	-0.0693452	5.78451	1.32887	0.249007	0.0950906	0.00580411	4.05145e-06	0.271139
Fam84b	1.51075	4.80189	150.518	1.33603e-34	0.150032	4.80189	1.50735	0.219544	-0.472392	-0.0324578	0	0.241734
Fam86	-0.372901	5.83053	36.9366	1.22035e-09	0.0815886	5.83053	1.76932	0.183467	0.127789	0.022574	0	0.205952
Fam89b	0.106155	4.86826	1.7628	0.184275	0.0122227	4.86826	0.0233082	0.878658	-0.0368393	0.0247161	0.204396	0.885085
Fam98c	0.217044	4.54617	6.9812	0.00823701	-0.0158684	4.54617	0.0373769	0.8467	-0.0786811	0.0341725	0.0110848	0.855035
Fanca	-0.396209	2.85167	5.49876	0.01903	0.00182039	2.85167	0.000103664	0.991876	0.126517	0.0121624	0.0243695	0.992355
Fancg	-0.530975	4.47074	24.5842	7.11341e-07	0.11741	4.47074	1.20241	0.272841	0.176486	0.0652004	4.05145e-06	0.295432
Fancl	1.34467	5.1237	285.04	5.98897e-64	-0.0170103	5.1237	0.0455534	0.83099	-0.429895	-0.0377178	0	0.840024
Fancm	-0.153566	3.49141	2.1184	0.145538	0.118416	3.49141	1.26049	0.261559	0.0531672	0.00649569	0.163756	0.284096
Far1	0.104767	4.2909	1.13257	0.287227	-0.0878194	4.2909	0.795197	0.372533	-0.0393234	-0.0519722	0.310686	0.395009
Farp1	-0.381317	6.03989	53.6432	2.40419e-13	-0.00984043	6.03989	0.0357302	0.850074	0.128882	-0.0128778	0	0.858248
Fars2	0.128023	5.03301	3.06996	0.0797512	-0.0478144	5.03301	0.428192	0.512877	-0.0446037	0.0459916	0.0938236	0.533248
Farsa	0.0791247	4.17036	0.613791	0.433364	0.156547	4.17036	2.40703	0.120791	-0.0241197	0.0592402	0.455185	0.138657
Farsb	0.217451	6.84185	22.3985	2.21552e-06	-0.0141861	6.84185	0.0953652	0.757464	-0.0752582	-0.000577111	4.05145e-06	0.770145
Fas	0.00520424	6.50106	0.0116343	0.914105	0.0813163	6.50106	2.83858	0.0920255	-0.002236	-0.031548	0.917597	0.107392
Fasn	-0.0308145	3.28327	0.0394829	0.842495	-0.0616149	3.28327	0.153338	0.695366	0.0135239	0.0473543	0.848326	0.710037
Fastk	-0.155191	4.55448	3.72218	0.0536941	-0.0588006	4.55448	0.534579	0.464688	0.0508543	0.00394002	0.065042	0.486349
Fastkd1	0.0886585	2.74034	0.211209	0.645822	-0.153676	2.74034	0.631917	0.426653	-0.0260591	0.0394342	0.660448	0.449096
Fat4	-0.0835647	3.87531	0.823273	0.364225	0.0210155	3.87531	0.052063	0.819512	0.0333252	0.00857057	0.387056	0.829519
Fbf1	0.718077	4.35923	27.8125	1.33657e-07	0.294497	4.35923	4.70526	0.0300705	-0.220944	0.0544968	0	0.0378649
Fbl	-0.300208	3.36579	4.25079	0.0392321	-0.159088	3.36579	1.19147	0.275034	0.0991619	-0.0616915	0.0483055	0.297685
Fbp1	-0.524833	10.9253	445.635	6.42789e-99	-0.0168804	10.9253	0.463218	0.496124	0.179115	0.00219204	0	0.51716
Fbxl14	-0.051563	4.64545	0.640719	0.423451	-0.0560306	4.64545	0.756406	0.384456	0.0199345	-0.0112488	0.445303	0.406835
Fbxl21	-0.701968	2.85746	22.0952	2.59459e-06	-0.194306	2.85746	1.68798	0.193867	0.235396	0.00903018	4.05145e-06	0.216283
Fbxl3	7.86231	6.38251	838.878	1.90321e-184	0.120539	6.38251	0.228868	0.632364	-0.990364	0.00339934	0	0.649343
Fbxo11	-0.130341	4.66433	2.31571	0.128073	-0.10567	4.66433	1.52161	0.217376	0.0441795	-0.0453941	0.145694	0.239566
Fbxo21	-0.419964	7.56893	72.6698	1.5326e-17	0.0114257	7.56893	0.0539229	0.816372	0.144473	-0.00843274	0	0.826298
Fbxo22	-0.294161	7.16403	47.1375	6.61777e-12	0.0318474	7.16403	0.55299	0.457099	0.100149	0.0280205	0	0.478902
Fbxo25	0.109354	4.11348	1.69992	0.192299	-0.120228	4.11348	2.05458	0.151749	-0.0409438	0.0195658	0.212863	0.172268
Fbxo28	-0.273002	2.63486	4.44058	0.0350943	0.246165	2.63486	3.60921	0.0574605	0.0909944	0.0475007	0.0434964	0.0691178
Fbxo3	-0.422585	6.78063	65.8936	4.75939e-16	0.0533317	6.78063	1.05125	0.30522	0.144541	0.0189754	0	0.328488
Fbxo31	0.852592	6.97517	368.291	4.40833e-82	-0.0232021	6.97517	0.273735	0.600837	-0.287723	-0.00945528	0	0.618616
Fbxo32	-0.349229	3.377	6.6622	0.00984792	0.218712	3.377	2.61086	0.106134	0.128469	0.0639251	0.0131794	0.122868
Fbxo33	0.240849	4.46757	8.36722	0.0038205	0.073641	4.46757	0.781566	0.376663	-0.0837763	0.0255	0.00538438	0.399056
Fbxo38	0.0635543	3.68077	0.354532	0.551559	-0.0340261	3.68077	0.102282	0.749108	-0.0233426	0.011651	0.570153	0.761839
Fbxo45	-0.0261192	3.82641	0.0733562	0.786511	-0.0612814	3.82641	0.404429	0.524811	0.00612774	0.0250023	0.794948	0.54507
Fbxo6	0.818721	5.82267	157.829	3.37272e-36	0.0214691	5.82267	0.108788	0.741529	-0.272496	-0.0111285	0	0.754198
Fbxo7	-0.0238689	3.56929	0.0357633	0.850005	0.00591825	3.56929	0.0022386	0.962263	0.00573232	-0.0141873	0.855541	0.964282
Fbxo8	-0.104141	4.50366	2.56952	0.10894	-0.00141762	4.50366	0.000485162	0.982427	0.0343733	-0.012802	0.125307	0.98313
Fbxo9	0.262507	6.31106	25.2064	5.15121e-07	-0.0152178	6.31106	0.0847314	0.770985	-0.0904229	0.0134224	4.05145e-06	0.783235
Fbxw11	-0.0587514	5.51798	0.902779	0.342038	0.0285508	5.51798	0.213211	0.644262	0.0199853	0.0149958	0.365474	0.660545
Fbxw2	-0.153231	2.43065	1.15259	0.283007	0.102242	2.43065	0.510845	0.474774	0.0547497	-0.080273	0.306355	0.496182
Fbxw7	0.076384	4.16155	0.663313	0.415393	0.0560597	4.16155	0.357794	0.549734	-0.025523	-0.0107338	0.437529	0.569051
Fbxw8	-0.104687	5.94975	3.48702	0.0618519	0.0189193	5.94975	0.113912	0.735733	0.03606	0.0151892	0.074097	0.748717
Fbxw9	-0.260809	4.89691	17.1043	3.53814e-05	-0.10397	4.89691	2.71655	0.0993122	0.0869861	-0.0477877	8.9132e-05	0.115199
Fcf1	-10.0028	4.48075	2100.09	0	0.0170841	4.48075	2.33858e-12	0.999999	1	0	0	0.999733
Fcgr2b	0.0215929	5.88826	0.085264	0.770287	0.112409	5.88826	2.30549	0.128917	-0.00794083	0.0309295	0.77907	0.147432
Fcgrt	0.00806963	8.13658	0.0628136	0.802103	-0.0229465	8.13658	0.50791	0.476045	-0.0035545	0.00718972	0.810279	0.497433
Fchsd2	-0.0970668	3.2833	0.55713	0.455419	-0.0515852	3.2833	0.157657	0.691323	0.033978	0.0133587	0.476816	0.706168
Fdft1	-0.0242289	3.78461	0.0346321	0.852369	0.0609989	3.78461	0.21438	0.643356	0.0225397	-0.045604	0.857782	0.659735
Fdx1	-0.261486	4.07292	7.17827	0.0073792	0.00814929	4.07292	0.00704029	0.933131	0.0881747	-0.0381256	0.0100436	0.936445
Fdxacb1	0.205953	2.49245	1.45245	0.228136	-0.0225968	2.49245	0.0172296	0.895568	-0.0752876	0.0501823	0.249995	0.901051
Fdxr	-0.400286	5.79581	49.9106	1.6091e-12	-0.0785974	5.79581	1.92374	0.165444	0.137116	0.00538984	0	0.186962
Fech	-0.346532	6.401	58.8599	1.6931e-14	0.000710436	6.401	0.000248455	0.987424	0.119094	7.91095e-05	0	0.988
Fermt2	-0.157922	6.62687	12.9105	0.000326738	0.0439166	6.62687	0.998719	0.317621	0.0535096	-0.00478649	0.000546946	0.340671
Fes	-0.457897	3.02735	9.80204	0.00174319	-0.0144947	3.02735	0.010173	0.919661	0.151708	-0.0439064	0.00261319	0.923249
Fetub	-0.187306	6.54733	12.4107	0.000426873	0.025428	6.54733	0.228721	0.632474	0.0643908	-0.00891495	0.00072521	0.649464
Fez2	0.0775865	5.31743	1.14519	0.284558	-0.0403115	5.31743	0.309036	0.578272	-0.0224457	-0.0296212	0.30802	0.59686
Fga	-0.174053	13.2709	48.6607	3.04298e-12	-0.00492926	13.2709	0.0390533	0.843343	0.0597001	0.000277504	0	0.851875
Fgb	-0.279138	13.9677	138.031	7.17585e-32	-0.00809767	13.9677	0.116341	0.733038	0.0960637	-0.00597296	0	0.746022
Fgd2	0.390359	3.91481	7.39182	0.00655212	0.133245	3.91481	0.863834	0.352668	-0.119506	0.046476	0.00890509	0.375671
Fgd4	7.0666	2.67736	614.314	1.28935e-135	0.0397954	2.67736	0.000889638	0.976205	-0.992222	-0.00777778	0	0.977271
Fgd6	-0.168993	7.06024	16.9882	3.76128e-05	-0.026973	7.06024	0.432953	0.510543	0.0573726	-0.00355862	8.9132e-05	0.530979
Fgf1	0.170243	9.13323	31.1961	2.33238e-08	0.0341685	9.13323	1.2572	0.262182	-0.0592415	0.0220048	0	0.284777
Fgfr1op2	-0.147662	7.95078	21.809	3.01191e-06	-0.0115827	7.95078	0.134204	0.714113	0.0504325	0.00399811	4.05145e-06	0.727973
Fgg	-0.0684347	11.2371	7.97735	0.00473662	-0.00574949	11.2371	0.0563156	0.812417	0.0229675	0.00659921	0.0065593	0.82268
Fggy	0.643221	7.45937	213.038	2.98664e-48	0.0561091	7.45937	1.62843	0.20192	-0.21841	0.00772306	0	0.224224
Fgr	-0.009509	3.93194	0.00745819	0.93118	0.093064	3.93194	0.704722	0.401202	0.0093615	0.0357556	0.934492	0.423754
Fh1	0.782644	4.16566	64.1222	1.16937e-15	-0.150024	4.16566	2.3537	0.124986	-0.263938	-0.00609489	0	0.143207
Fignl2	-0.38115	3.72578	13.1853	0.000282151	0.0629122	3.72578	0.357851	0.549702	0.127976	0.00412639	0.000494277	0.569031
Filip1l	-0.714863	3.87613	11.9356	0.000550707	-0.21799	3.87613	1.11895	0.290144	0.219639	-0.0216152	0.000903474	0.31274
Fip1l1	-0.378103	3.05362	13.7474	0.000209106	-0.205901	3.05362	4.06753	0.043715	0.125209	-0.0281606	0.000376785	0.0535602
Fis1	0.1781	4.07973	2.11187	0.14616	0.143337	4.07973	1.35805	0.243876	-0.0725067	0.0380304	0.16438	0.265852
Fitm2	0.35407	7.32379	104.896	1.28724e-24	-0.0064723	7.32379	0.0351649	0.85125	-0.121857	0.00337285	0	0.859265
Fiz1	-0.162306	3.31822	2.06816	0.150403	0.046877	3.31822	0.17169	0.678614	0.0629088	0.00515207	0.168982	0.693933
Fkbp11	0.16751	3.59807	1.4654	0.226073	0.182693	3.59807	1.74067	0.187054	-0.0587785	0.0162821	0.247767	0.209647
Fkbp15	-0.0322438	4.62663	0.123221	0.725567	0.0265196	4.62663	0.0833508	0.772807	0.0166831	0.0297313	0.737158	0.784961
Fkbp3	-0.279276	5.05275	14.4432	0.000144449	0.0675104	5.05275	0.843363	0.358437	0.0954356	-0.0110674	0.000243087	0.381258
Fkbp4	-1.3414	8.62702	1325.7	2.93499e-290	-0.0470384	8.62702	1.66822	0.196497	0.432897	-0.0135563	0	0.218827
Fkbp7	0.530327	3.2757	4.93491	0.0263195	0.425128	3.2757	3.17447	0.0747973	-0.167945	-0.0581301	0.0330923	0.0884392
Fktn	0.122387	2.80209	0.613627	0.433426	-0.0533428	2.80209	0.11606	0.733348	-0.042569	-0.0787661	0.455229	0.746411
Flcn	-0.114472	6.13595	4.51215	0.0336549	-0.0927309	6.13595	2.96132	0.0852782	0.0378511	-0.0182858	0.0418069	0.100083
Fli1	0.150163	2.91075	1.53983	0.214644	-0.225274	2.91075	3.46221	0.0627864	-0.0731533	-0.0707109	0.235928	0.0750046
Flii	0.299415	5.02639	10.7987	0.00101571	0.00887884	5.02639	0.00949712	0.922367	-0.103628	-0.0497318	0.00159222	0.925988
Flot1	0.175451	4.87153	4.0641	0.0438041	-0.0135375	4.87153	0.024261	0.876223	-0.0570491	-0.0262221	0.0537263	0.882617
Flt1	0.174743	2.53006	0.65505	0.418313	-0.0917214	2.53006	0.181151	0.670386	-0.0539389	0.049097	0.440312	0.685907
Flt4	0.145157	4.18061	2.11174	0.146173	-0.0572205	4.18061	0.328085	0.566789	-0.0539719	0.0209022	0.1644	0.586087
Flywch1	0.337174	2.57665	3.80449	0.0511154	-0.0650525	2.57665	0.14063	0.707655	-0.115305	-0.0415819	0.0621736	0.72188
Fmn1	-0.274631	3.95995	4.23498	0.039599	0.0978194	3.95995	0.537688	0.463392	0.0942564	0.0123761	0.0487552	0.485089
Fmn2	0.222326	4.21791	5.09929	0.0239357	-0.250024	4.21791	6.43407	0.0111952	-0.100712	-0.0316949	0.0301874	0.0152294
Fmnl3	-0.0728568	2.76153	0.20272	0.652534	-0.0175658	2.76153	0.0118114	0.913456	0.0228068	0.00780985	0.666922	0.917569
Fmo1	-0.00722908	9.37374	0.0658442	0.797487	0.000498903	9.37374	0.00031456	0.98585	0.00201201	-6.85424e-05	0.80581	0.986407
Fmo2	-0.992652	6.28945	321.241	7.77179e-72	0.0744731	6.28945	1.81007	0.1785	0.320211	-0.000952648	0	0.200664
Fmo4	-0.138312	3.73326	0.979755	0.322259	-0.220788	3.73326	2.49789	0.113999	0.0432531	0.0156358	0.345488	0.131101
Fmo5	-0.583169	4.46787	73.0583	1.25876e-17	0.0478479	4.46787	0.489377	0.484205	0.202618	0.0413145	0	0.505455
Fn1	0.0699095	11.5353	2.10631	0.146693	0.08436	11.5353	3.06689	0.0799022	-0.0232266	-0.00880442	0.164959	0.0941639
Fnbp1l	-0.487522	5.28366	28.314	1.03149e-07	-0.00679761	5.28366	0.00555246	0.940601	0.164594	-0.0181031	0	0.943847
Fnip1	-3.22846	2.70041	193.194	6.38634e-44	-0.0379875	2.70041	0.040901	0.839729	0.79141	-0.0369138	0	0.848415
Fnip2	1.00953	3.56613	110.799	6.54723e-26	0.0630292	3.56613	0.433475	0.510289	-0.338622	-0.0264336	0	0.530696
Focad	0.146808	5.57692	4.58126	0.0323235	0.0215613	5.57692	0.0987535	0.753331	-0.0503901	-0.014257	0.0403241	0.765984
Fosl2	0.21896	5.15269	6.54477	0.0105193	-0.0414934	5.15269	0.235394	0.627553	-0.0755807	-0.0373785	0.0141355	0.644416
Foxa1	-0.269101	3.36806	6.64796	0.00992694	0.123238	3.36806	1.39237	0.238004	0.0987928	0.0305571	0.013305	0.26012
Foxa2	0.111474	5.76584	4.90046	0.0268496	0.0259928	5.76584	0.266545	0.605659	-0.0388992	0.00638525	0.0337972	0.623231
Foxj2	-0.118106	4.07202	1.18895	0.275541	-0.117865	4.07202	1.18416	0.27651	0.0393529	0.0177133	0.298544	0.299095
Foxn2	-1.55868	4.24729	159.176	1.71235e-36	-0.179708	4.24729	2.13855	0.143637	0.482678	-0.0443745	0	0.163881
Foxn3	0.193937	5.75209	12.9072	0.000327312	-0.0589968	5.75209	1.19422	0.27448	-0.0686042	-0.0255098	0.000546946	0.297044
Foxq1	-0.177022	3.75683	2.19126	0.138796	0.190712	3.75683	2.54762	0.110461	0.0602985	0.0688081	0.156726	0.127361
Fras1	0.169568	4.96468	3.74197	0.0530618	-0.0182063	4.96468	0.0432229	0.835306	-0.0494396	-0.0107598	0.0643533	0.844173
Frmd4a	0.336064	2.20299	2.17963	0.139848	-0.329938	2.20299	2.10277	0.147032	-0.122481	-0.106806	0.157889	0.167191
Frmd6	0.0230246	2.77134	0.019754	0.888226	-0.203829	2.77134	1.52821	0.216381	-0.00521622	-0.00768379	0.892713	0.238578
Frmd8	0.368071	4.54345	13.2796	0.000268317	-0.204822	4.54345	4.11147	0.0425934	-0.132495	-0.0229943	0.000457814	0.0522273
Frs2	-0.0517004	4.88499	0.743747	0.388463	0.0778	4.88499	1.68509	0.194249	0.0191218	0.0144436	0.411048	0.216708
Fryl	0.0575334	5.78285	0.911456	0.339728	-0.00447443	5.78285	0.00549838	0.94089	-0.0199976	-0.00710529	0.363241	0.94409
Fst	-0.818132	3.11276	21.931	2.82627e-06	0.214043	3.11276	1.52627	0.216673	0.250408	-0.0180644	4.05145e-06	0.238829
Fto	-0.170267	3.75475	2.90615	0.0882421	0.0172978	3.75475	0.0300244	0.862435	0.0554644	0.028273	0.102899	0.869653
Fubp1	0.111244	6.43321	5.53788	0.0186091	0.0421285	6.43321	0.794259	0.372815	-0.0373865	-0.00623747	0.0238671	0.395317
Fuca1	0.181492	6.17607	15.8196	6.96788e-05	-0.0222293	6.17607	0.237469	0.62604	-0.063489	-0.0164486	0.000129647	0.642966
Fuom	0.448419	5.69224	22.5006	2.10075e-06	-0.0310975	5.69224	0.108877	0.741426	-0.14624	0.0143289	4.05145e-06	0.754097
Furin	-0.0767653	7.656	5.42056	0.019901	0.000836154	7.656	0.000640392	0.979811	0.0262251	-0.009666	0.0254107	0.980845
Fuz	0.0836371	4.24012	0.727575	0.39367	-0.0386992	4.24012	0.155844	0.693012	-0.0283958	-0.0479899	0.416202	0.707765
Fxr2	-0.0646876	5.03085	0.624287	0.429459	-0.0395005	5.03085	0.232808	0.629449	0.0233205	-0.0408199	0.451239	0.646361
Fxyd1	-1.24987	7.20618	23.4642	1.27257e-06	-0.206402	7.20618	0.647425	0.421035	0.354711	0.0101921	4.05145e-06	0.44348
Fxyd5	-0.0493124	4.21064	0.14509	0.703272	0.251386	4.21064	3.77827	0.0519223	0.0174581	0.0618752	0.71609	0.0629515
Fyco1	0.231901	8.89772	61.9056	3.60315e-15	0.0171291	8.89772	0.33799	0.560992	-0.0809687	0.0152316	0	0.580265
Fyttd1	-0.121091	5.71019	5.03849	0.0247901	-0.0608922	5.71019	1.27371	0.259071	0.0423107	-0.0347471	0.0312205	0.281491
Fzd1	0.249034	3.47246	4.99971	0.0253516	0.15552	3.47246	1.95288	0.162277	-0.0750628	0.00851479	0.0318282	0.183511
Fzd4	-0.0557003	4.91601	0.296281	0.586224	-0.0289692	4.91601	0.0803662	0.776802	0.0171786	-0.0237452	0.603298	0.788903
Fzd5	-0.115807	3.67446	1.24419	0.264666	-0.101256	3.67446	0.951443	0.329352	0.0371728	0.0347752	0.287374	0.352456
Fzd6	-0.143246	2.09885	0.468648	0.49361	0.214312	2.09885	1.04609	0.30641	0.0570333	-0.074115	0.514733	0.32963
Fzd7	-0.479455	3.33814	20.3845	6.33411e-06	-0.0883674	3.33814	0.694971	0.404479	0.169295	-0.0427648	8.10291e-06	0.427274
G0s2	-0.0668271	8.32474	4.51983	0.0335043	-0.0533543	8.32474	2.88153	0.0896009	0.0205251	0.00101042	0.0416206	0.10473
G2e3	0.311242	3.70643	9.07557	0.00259046	-0.10423	3.70643	1.0181	0.312971	-0.108311	0.0162532	0.00379216	0.335963
G3bp1	0.233417	5.16518	12.0094	0.000529331	0.0401538	5.16518	0.355523	0.551003	-0.0810002	0.00257559	0.000887268	0.570319
G3bp2	-0.315765	5.49245	45.7134	1.36884e-11	-0.0531428	5.49245	1.29341	0.255421	0.108701	-0.00613995	0	0.277638
G6pc	0.169952	8.55028	30.5993	3.17215e-08	0.00884693	8.55028	0.0829686	0.773314	-0.0591347	-0.0158049	0	0.785374
Gab1	0.354806	3.12778	6.8081	0.0090745	-0.0314051	3.12778	0.0533596	0.817317	-0.117444	-0.00120949	0.012126	0.827246
Gabarap	-0.0295338	6.67706	0.395439	0.529454	0.0291804	6.67706	0.38604	0.534388	0.00988346	0.0147999	0.548935	0.554283
Gabarapl1	0.00149099	8.43032	0.00269056	0.958632	-0.0174293	8.43032	0.367207	0.544531	-0.00148937	-0.00105445	0.960976	0.56397
Gabarapl2	-0.258339	3.3409	4.39914	0.0359571	-0.182265	3.3409	2.18589	0.139281	0.0898407	0.0124419	0.0445862	0.159133
Gabpa	-0.147286	6.68651	8.24354	0.00408972	0.0190093	6.68651	0.137353	0.710927	0.0492726	0.0173409	0.00577737	0.724931
Gadd45gip1	0.356716	6.37535	70.2228	5.29718e-17	-0.0792064	6.37535	3.46149	0.0628136	-0.125277	-0.00153158	0	0.075037
Gak	-0.390673	5.86428	45.1865	1.79139e-11	-0.137771	5.86428	5.62075	0.017749	0.134227	-0.0164319	0	0.0232553
Galc	1.00974	4.86301	143.656	4.22384e-33	-0.00441468	4.86301	0.00292063	0.956901	-0.333023	-0.0301852	0	0.959149
Gale	0.0622105	2.53528	0.109059	0.741218	0.356763	2.53528	3.52578	0.0604214	-0.0108165	0.0609009	0.751986	0.0723265
Galk2	0.413059	4.91612	28.2397	1.07183e-07	-0.143338	4.91612	3.39863	0.0652506	-0.14659	-0.0309706	0	0.0778122
Galns	-0.779273	5.05425	84.2227	4.42068e-20	-0.152591	5.05425	3.23828	0.0719363	0.260462	-0.0550145	0	0.0852507
Galnt1	0.00330801	5.24038	0.00294485	0.956723	-0.0459278	5.24038	0.569729	0.450366	-0.00258629	0.00298395	0.959263	0.472416
Galnt10	0.0374198	4.67668	0.231741	0.630236	-0.094666	4.67668	1.48503	0.222989	-0.0134542	-0.0427993	0.645692	0.245316
Galnt11	-0.146487	4.97237	4.50256	0.0338441	0.03625	4.97237	0.27543	0.599712	0.0495479	0.0181805	0.0420379	0.617429
Galnt18	-0.773703	2.79785	15.3062	9.14154e-05	0.139006	2.79785	0.457102	0.498982	0.257861	-0.073605	0.000170161	0.52002
Galnt2	0.0363043	4.95404	0.268399	0.604408	-0.0226508	4.95404	0.104291	0.74674	-0.0148568	-0.00829336	0.620735	0.759392
Galt	0.0563695	7.45489	2.02726	0.154499	0.0213122	7.45489	0.289781	0.590361	-0.0194585	0.00689452	0.17326	0.608536
Ganc	0.214499	5.09504	7.7225	0.00545368	-0.00114017	5.09504	0.000221457	0.988127	-0.0738588	-0.00998977	0.00746278	0.988721
Gapdh	-0.194754	9.22392	63.8638	1.33326e-15	0.00143295	9.22392	0.00345981	0.953095	0.0668201	0.00191604	0	0.955592
Gapdhs	0.0906004	2.96582	0.189713	0.663155	-0.39725	2.96582	3.66474	0.0555752	-0.0281439	0.0172264	0.67735	0.067007
Gapvd1	0.0872545	5.31458	1.25435	0.262723	0.00977235	5.31458	0.0157285	0.900196	-0.0297938	0.0180044	0.285299	0.90537
Garem	0.0891848	6.12381	2.7907	0.0948128	-0.0463094	6.12381	0.752572	0.385663	-0.0308626	0.00136875	0.110074	0.408139
Gart	0.0582119	4.40101	0.529523	0.466807	0.0126792	4.40101	0.0251786	0.873923	-0.0192698	-0.00829959	0.488233	0.880409
Gas1	1.02069	4.50979	34.9995	3.29798e-09	-0.0815198	4.50979	0.227256	0.633566	-0.322259	0.0339027	0	0.650445
Gas2	-0.125861	5.29927	3.00059	0.0832343	0.0296138	5.29927	0.166216	0.683497	0.041545	-0.0292443	0.0975995	0.698718
Gas2l3	0.338344	2.80287	4.516	0.0335792	-0.270896	2.80287	2.89435	0.0888905	-0.11317	-0.00813119	0.0417016	0.103944
Gas5	-0.196539	6.12352	13.8546	0.000197508	0.0425992	6.12352	0.650939	0.419777	0.067608	0.0304998	0.000352476	0.442196
Gas6	-0.134822	7.84908	4.86094	0.0274714	0.0796048	7.84908	1.69558	0.192866	0.044651	0.00697603	0.0345062	0.215181
Gatc	0.397406	2.70727	7.61306	0.00579472	0.236116	2.70727	2.68718	0.101159	-0.127298	0.0931419	0.00792464	0.117306
Gatm	1.0148	5.31766	194.378	3.5219e-44	-0.0967753	5.31766	1.7743	0.182851	-0.335848	-0.0433226	0	0.205267
Gba	-0.115114	3.86082	0.987267	0.320411	-0.0452835	3.86082	0.152969	0.695714	0.039889	-0.0307674	0.343486	0.710406
Gba2	0.377853	3.26207	12.6782	0.000369942	0.0649726	3.26207	0.375014	0.540284	-0.129592	-0.0109396	0.000632027	0.559976
Gbe1	0.243356	9.14942	78.3769	8.51428e-19	-0.0209863	9.14942	0.58341	0.444979	-0.084251	-0.0135379	0	0.46727
Gbp2	0.0628664	5.00776	0.477328	0.489635	-0.0289416	5.00776	0.101417	0.750135	-0.0148238	0.0173341	0.510929	0.76282
Gbp2b	2.40496	4.7515	582.822	9.12436e-129	0.084417	4.7515	0.708464	0.399954	-0.687623	0.0162723	0	0.42253
Gbp3	0.38631	6.01368	33.8126	6.06849e-09	-0.0102071	6.01368	0.0235487	0.878039	-0.128828	0.00791768	0	0.884469
Gbp5	0.420049	3.56949	10.0464	0.00152647	-0.135382	3.56949	1.04606	0.306417	-0.1336	-0.0033113	0.00236605	0.329634
Gbp7	0.764296	7.12229	159.943	1.16421e-36	0.0858891	7.12229	2.03166	0.154053	-0.259773	0.00539949	0	0.174768
Gc	-0.687516	4.52697	22.4604	2.14524e-06	0.107891	4.52697	0.556636	0.455619	0.224238	0.0424118	4.05145e-06	0.477452
Gcc2	-0.0994836	5.90086	2.11955	0.145429	0.00675298	5.90086	0.00976492	0.921283	0.033119	-0.011656	0.16363	0.924874
Gcdh	-0.146834	8.35352	24.8665	6.144e-07	0.0406825	8.35352	1.90926	0.167046	0.0511977	0.00209877	4.05145e-06	0.18866
Gcfc2	0.148935	3.43597	1.81966	0.177354	-0.165951	3.43597	2.25872	0.132864	-0.0505887	-0.0466462	0.196986	0.151804
Gch1	-0.195538	7.02943	34.0623	5.33745e-09	0.0516607	7.02943	2.37745	0.123098	0.0669048	0.00959732	0	0.141047
Gchfr	-0.114235	7.6742	10.1295	0.00145912	-0.00601938	7.6742	0.0281342	0.866794	0.0393197	0.00292351	0.00226071	0.873639
Gck	2.73551	8.34708	2232.29	0	0.00808833	8.34708	0.0212249	0.884168	-0.735384	0.00838796	0	0.890121
Gclc	-0.376613	9.04117	193.039	6.90203e-44	-0.00899896	9.04117	0.110381	0.739711	0.129141	-0.00110817	0	0.752521
Gclm	-0.719839	8.40956	652.852	5.35559e-144	0.0116401	8.40956	0.171462	0.678816	0.244007	0.00824494	0	0.694172
Gcn1l1	-0.302477	7.76328	83.628	5.97221e-20	0.0508541	7.76328	2.36524	0.124065	0.104153	0.0102296	0	0.142174
Gcom1	-0.108742	6.58134	9.19083	0.0024323	0.0145241	6.58134	0.163953	0.685543	0.037747	-0.00262949	0.00354097	0.700703
Gcsh	0.0464407	6.19716	0.770913	0.379935	-0.00317249	6.19716	0.00359499	0.952189	-0.0166943	-0.0285693	0.402552	0.954725
Gda	0.807514	7.97778	394.771	7.57365e-88	-0.031872	7.97778	0.619716	0.431153	-0.272466	-0.0341627	0	0.453734
Gdap2	-0.164136	6.89424	13.015	0.000308999	-0.0310973	6.89424	0.467312	0.494226	0.0562934	-0.0147196	0.000534792	0.515337
Gdi2	-0.0129987	7.65657	0.170418	0.679741	-0.0435393	7.65657	1.91187	0.166756	0.00362095	-0.00991074	0.693374	0.188308
Gdpgp1	-0.407645	3.84019	20.1786	7.05368e-06	0.0662278	3.84019	0.532389	0.465604	0.143032	-0.0143644	8.10291e-06	0.487285
Gemin2	-0.158308	4.54849	2.8822	0.0895638	-0.124377	4.54849	1.77952	0.182208	0.050979	0.00845716	0.104341	0.20459
Gfer	-0.0268341	4.8965	0.16426	0.685265	-0.0480431	4.8965	0.526371	0.468136	0.0102626	-0.0260349	0.69875	0.489902
Gfm2	0.0233469	2.89233	0.0313527	0.859456	0.0414295	2.89233	0.0981045	0.754116	-0.00812089	0.0365386	0.864588	0.766669
Gfod1	-0.325926	3.53311	9.04464	0.00263466	0.0450747	3.53311	0.173552	0.676974	0.10908	0.00483372	0.00386104	0.692369
Gfpt1	0.0492548	6.43157	1.02317	0.311769	0.109576	6.43157	5.06468	0.0244182	-0.0161986	0.000622921	0.335007	0.0313258
Gfra1	-0.616025	7.32152	206.611	7.53676e-47	0.0254516	7.32152	0.353932	0.551896	0.209361	-0.0136123	0	0.57121
Gga3	0.108227	3.81104	0.918235	0.337939	0.0777082	3.81104	0.472798	0.491703	-0.0397233	0.0207073	0.36139	0.51289
Ggnbp1	0.0648564	5.31059	1.36071	0.243414	-0.0103603	5.31059	0.0346974	0.852231	-0.0234418	-0.0064172	0.265723	0.860221
Ggnbp2	0.29108	3.54907	6.71883	0.00954003	-0.0650561	3.54907	0.336075	0.562104	-0.106976	-0.0214602	0.0127378	0.581327
Ggt7	-0.189485	4.29463	5.79208	0.0160986	0.0937413	4.29463	1.41695	0.233906	0.0602354	0.0342059	0.0210757	0.256068
Ghitm	8.09747	7.96145	1937.76	0	-0.00611547	7.96145	0.00170012	0.967111	-0.992335	-0.000270112	0	0.968678
Ghr	0.397315	3.62965	4.57404	0.03246	0.105887	3.62965	0.327642	0.567051	-0.117872	0.0442984	0.04047	0.58631
Gid4	0.432771	4.07563	22.7906	1.80648e-06	0.0120677	4.07563	0.0178214	0.893801	-0.147329	-0.0029022	4.05145e-06	0.899455
Gigyf1	-0.131035	4.86599	3.18884	0.0741426	-0.10101	4.86599	1.89416	0.168733	0.0445628	-0.0344592	0.0877909	0.190378
Gigyf2	0.512686	5.25294	63.7702	1.39815e-15	-0.0421448	5.25294	0.43081	0.511592	-0.177961	0.0028443	0	0.532004
Gimap6	0.388853	5.22554	28.5659	9.05651e-08	0.00770944	5.22554	0.0113309	0.915228	-0.132047	-0.0322157	0	0.919153
Gin1	0.368997	3.66425	8.78902	0.0030305	-0.187232	3.66425	2.26283	0.132511	-0.12556	-0.0687987	0.00429454	0.151455
Gipc1	-0.46364	4.57216	39.2101	3.80572e-10	0.00340807	4.57216	0.00209488	0.963494	0.157586	-0.00862678	0	0.965287
Git1	0.128511	2.92845	0.937722	0.332864	0.137144	2.92845	1.06612	0.301823	-0.045334	0.0574146	0.356455	0.325028
Git2	-0.397471	4.39722	21.1321	4.28676e-06	0.0361503	4.39722	0.174367	0.676259	0.138047	0.0218202	4.05145e-06	0.69166
Gja1	-0.11213	2.70043	0.744087	0.388355	0.111303	2.70043	0.733012	0.391909	0.0463451	0.0764125	0.410939	0.414395
Gja4	0.153057	3.01463	1.0428	0.307172	0.0395071	3.01463	0.0698453	0.791562	-0.0494154	-0.0974502	0.330356	0.802901
Gjb2	-2.56648	4.61528	484.794	1.93502e-107	0.10164	4.61528	0.767829	0.38089	0.705767	4.84238e-05	0	0.403282
Glcci1	-0.180333	2.91883	1.93442	0.164275	-0.0123838	2.91883	0.00940709	0.922734	0.0658315	-0.0379723	0.183223	0.926353
Glce	-0.0616282	4.05047	0.476592	0.48997	-0.0633895	4.05047	0.504367	0.477587	0.0188725	0.0179856	0.511229	0.498961
Gldc	0.177082	8.18366	24.9386	5.9186e-07	-0.0103592	8.18366	0.0853684	0.77015	-0.0617308	0.0103663	4.05145e-06	0.782482
Gle1	8.02109	4.46261	859.075	7.73676e-189	-0.911498	4.46261	7.21427	0.00723261	-0.991948	-0.00364408	0	0.00978831
Glipr1	0.201874	3.9233	4.26096	0.038998	0.150447	3.9233	2.36429	0.12414	-0.0725558	0.0398363	0.0480867	0.142271
Glns-ps1	2.59974	3.51716	372.144	6.38824e-83	0.061766	3.51716	0.204043	0.651477	-0.711617	-0.0381738	0	0.667943
Glo1	-0.150089	8.95583	22.9644	1.65032e-06	-0.00459957	8.95583	0.021566	0.883247	0.0517023	-0.00824609	4.05145e-06	0.88929
Glod4	0.172989	6.39451	7.77846	0.00528728	0.063689	6.39451	1.05466	0.304435	-0.0592933	0.00683275	0.00728451	0.327706
Glrx2	-0.03068	4.93028	0.130008	0.718423	-0.167931	4.93028	3.89635	0.0483913	0.00949612	-0.0467852	0.730234	0.0586975
Gls	-0.157461	3.49481	1.99588	0.157727	0.234406	3.49481	4.42176	0.0354834	0.0570723	0.0318758	0.176712	0.0440474
Gls2	0.219502	9.84256	69.0215	9.73935e-17	0.00788355	9.84256	0.0891048	0.765318	-0.0761465	-0.0015693	0	0.777887
Glt1d1	0.212539	6.34584	10.4081	0.00125462	-0.0347083	6.34584	0.277861	0.598107	-0.0706132	-0.0249811	0.00197711	0.615776
Gltpd1	0.659887	6.34752	178.237	1.17571e-40	-0.0185963	6.34752	0.141985	0.706316	-0.22552	0.00218083	0	0.720458
Gltpd2	0.998655	5.93413	321.076	8.44272e-72	-0.0255764	5.93413	0.21138	0.645688	-0.330075	-0.0256801	0	0.662036
Gltscr1l	0.0656234	3.9242	0.534572	0.464691	-0.0687466	3.9242	0.587041	0.443566	-0.0262316	-0.00953186	0.486142	0.465905
Glul	-2.71092	11.4037	4686.31	0	0.0561098	11.4037	2.25921	0.132822	0.732975	0.0167745	0	0.151751
Glyr1	0.0284071	5.81689	0.352971	0.552436	-0.0451036	5.81689	0.889867	0.345513	-0.0111619	-0.0148024	0.571056	0.368374
Gm10075	-8.55519	3.73658	1146.85	2.16942e-251	-0.547165	3.73658	3.51315	0.0608836	0.996822	-0.00317797	0	0.0728856
Gm10116	-2.00828	4.62026	601.003	1.01332e-132	-0.0803599	4.62026	0.932881	0.334115	0.599679	-0.028481	0	0.35699
Gm10138	-0.564634	2.67201	16.001	6.33092e-05	0.0412554	2.67201	0.0870168	0.768004	0.192714	-0.0120506	0.000129647	0.7805
Gm10156	6.03647	4.05318	773.645	2.89959e-170	-0.471243	4.05318	3.56214	0.0591116	-0.970288	0.00269348	0	0.0708923
Gm10222	1.03499	2.79638	2.77148	0.0959576	-1.26421	2.79638	3.84028	0.0500351	-0.151167	-0.73116	0.111293	0.0606746
Gm10277	0.0491855	3.26648	0.202389	0.6528	0.0294791	3.26648	0.0729857	0.787038	-0.0198348	-0.00124742	0.667201	0.798505
Gm10300	-0.22908	2.23135	2.31655	0.128004	-0.146894	2.23135	0.954183	0.328657	0.07063	0.0233093	0.145613	0.351751
Gm10319	4.64484	5.88646	286.785	2.49514e-64	-0.505425	5.88646	4.09192	0.0430886	-0.89236	-0.0310542	0	0.0528553
Gm10382	-2.94809	6.57708	204.197	2.53471e-46	0.187733	6.57708	0.943269	0.331439	0.722979	-0.0585209	0	0.354506
Gm10392	-0.211597	4.30452	5.90538	0.0150947	0.0940318	4.30452	1.16619	0.280185	0.0720466	0.0455784	0.0197751	0.302919
Gm10401	-0.378697	3.24898	10.5029	0.00119189	-0.0584649	3.24898	0.24962	0.617343	0.125404	-0.0130137	0.00187582	0.634539
Gm10499	-1.8377	7.63944	600.47	1.32326e-132	-0.127737	7.63944	3.05197	0.080639	0.55381	-0.0431039	0	0.0949782
Gm10563	0.453724	2.78866	11.6922	0.000627615	-0.129804	2.78866	0.958093	0.327668	-0.163181	-0.0704785	0.00100881	0.350722
Gm10644	-0.467038	3.7776	13.6834	0.000216354	-0.133365	3.7776	1.11799	0.290351	0.153574	0.0194948	0.000384888	0.312975
Gm10717	2.00999	5.7333	46.9719	7.20127e-12	-0.090267	5.7333	0.0882962	0.766354	-0.527945	0.0752267	0	0.778787
Gm10718	1.45293	4.32061	22.1164	2.56603e-06	0.184163	4.32061	0.372359	0.541721	-0.401495	0.0497907	4.05145e-06	0.561361
Gm10719	1.15797	5.29614	15.4491	8.47582e-05	0.267574	5.29614	0.822291	0.364511	-0.327601	-0.00254736	0.000162058	0.387088
Gm10720	0.943798	3.98567	14.2419	0.000160752	0.229486	3.98567	0.840702	0.359196	-0.279887	0.0134625	0.000271447	0.381918
Gm10800	2.84456	6.59892	334.638	9.38815e-75	-0.120982	6.59892	0.670068	0.413028	-0.728883	-0.0294068	0	0.435653
Gm11127	-2.51386	6.33318	44.0824	3.14845e-11	-0.57331	6.33318	2.48679	0.114806	0.542891	0.0660028	0	0.132037
Gm11131	0.458988	9.07821	141.141	1.499e-32	0.0134233	9.07821	0.121133	0.727809	-0.157013	-0.0109209	0	0.741084
Gm11212	8.1327	9.71333	223.722	1.39486e-50	0.0976187	9.71333	0.0635421	0.800983	-0.981815	0.00779027	0	0.811591
Gm11273	-1.22294	3.94217	189.198	4.75744e-43	-0.0399962	3.94217	0.20113	0.65381	0.393764	-0.00527737	0	0.670329
Gm11342	-1.0091	3.83041	78.7851	6.92478e-19	0.0971162	3.83041	0.72971	0.392977	0.329534	-0.00230583	0	0.415428
Gm11345	-0.385806	3.50812	2.16609	0.141085	0.306708	3.50812	1.34617	0.245949	0.126545	-0.0262108	0.159165	0.267991
Gm11398	-1.98249	3.8544	110.676	6.96726e-26	-0.243217	3.8544	1.72471	0.189088	0.545527	-0.101984	0	0.21153
Gm11407	0.532437	8.37451	309.612	2.65302e-69	0.0086534	8.37451	0.0819773	0.774635	-0.182659	0.00415329	0	0.786663
Gm11408	-7.65995	10.2192	4424.35	0	-0.063342	10.2192	0.440644	0.506812	0.989843	-0.000350696	0	0.527293
Gm11410	-2.2284	12.1128	4305.57	0	-0.00511688	12.1128	0.0247058	0.875102	0.647182	-0.0188014	0	0.881536
Gm11437	-0.1639	4.54767	2.10649	0.146675	-0.0541319	4.54767	0.229215	0.632107	0.0588503	0.0078079	0.164943	0.649055
Gm11465	0.00133455	2.5371	7.75489e-05	0.992974	-0.286175	2.5371	2.65476	0.10324	0.0114238	0.0362366	0.993335	0.119599
Gm11512	9.36335	7.83139	4634.65	0	-0.175359	7.83139	0.744312	0.388283	-0.99698	-0.00052523	0	0.410817
Gm11513	0.00205633	2.91227	0.000174872	0.989449	0.0430994	2.91227	0.0692289	0.792463	-0.00767534	0.0163693	0.989989	0.803784
Gm11517	-0.696715	2.41868	25.0967	5.45263e-07	0.0472868	2.41868	0.111926	0.737962	0.242204	-0.0702494	4.05145e-06	0.75084
Gm11518	-0.258011	3.25037	6.32223	0.0119233	-0.100865	3.25037	0.964998	0.325931	0.089397	-0.0234748	0.0158331	0.348964
Gm11537	-0.376662	2.60095	5.93999	0.0148011	-0.0839259	2.60095	0.294735	0.587202	0.130883	0.0894307	0.0194146	0.605478
Gm11547	-0.338129	2.45618	4.52576	0.0333882	0.0158022	2.45618	0.0100324	0.920216	0.107916	0.0852128	0.0415071	0.92378
Gm11560	-4.83657	3.07563	435.856	8.63559e-97	-0.566411	3.07563	4.93585	0.0263051	0.927918	-0.012615	0	0.0335501
Gm11574	-0.463267	5.18627	70.1412	5.52084e-17	0.0443234	5.18627	0.64089	0.423389	0.157882	-0.00848361	0	0.445931
Gm11583	7.29103	4.04056	503.408	1.72343e-111	-0.099416	4.04056	0.133104	0.715235	-0.986697	-0.00118534	0	0.72899
Gm11626	0.719867	2.6898	30.0522	4.2057e-08	-0.136055	2.6898	1.07209	0.300474	-0.23891	0.0186401	0	0.323549
Gm11799	-0.225263	4.44934	8.5728	0.00341223	-0.0468384	4.44934	0.370901	0.542513	0.0785566	-0.0536884	0.004882	0.562119
Gm11837	-1.44007	3.60975	90.688	1.68211e-21	-0.0294624	3.60975	0.0395725	0.842319	0.4416	-0.0188201	0	0.850866
Gm11942	1.63457	3.22795	99.0068	2.51632e-23	-0.0260042	3.22795	0.0255265	0.873062	-0.495533	0.0551836	0	0.879538
Gm12002	0.498611	3.08585	3.44209	0.0635554	0.379095	3.08585	1.98578	0.158783	-0.146059	-0.0468157	0.0760134	0.179658
Gm12043	0.661595	3.05898	29.0446	7.07315e-08	0.142431	3.05898	1.33872	0.247259	-0.233508	0.0288677	0	0.269357
Gm12174	-2.26337	2.68022	208.058	3.643e-47	0.101258	2.68022	0.395336	0.529508	0.6588	0.0134205	0	0.549604
Gm12188	-0.82325	2.55217	33.8864	5.84256e-09	0.0808285	2.55217	0.325782	0.568153	0.279375	0.029411	0	0.587347
Gm12212	0.19523	3.10868	2.72512	0.0987805	0.164361	3.10868	1.93177	0.164565	-0.0656517	0.0188182	0.114454	0.185974
Gm12264	-0.250458	4.57746	13.6028	0.000225852	0.0222085	4.57746	0.10686	0.743748	0.0860397	-0.00554951	0.000401094	0.756321
Gm12364	-0.305388	2.75084	5.59374	0.0180248	-0.0582943	2.75084	0.205317	0.650463	0.0999425	-0.0720208	0.0232432	0.666914
Gm12481	-2.69481	2.71247	237.585	1.32216e-53	-0.0281835	2.71247	0.0291638	0.864401	0.736419	0.0309221	0	0.871516
Gm12744	-0.0403943	6.6771	1.20431	0.272462	0.0146692	6.6771	0.158769	0.690292	0.0135199	-0.00706989	0.29529	0.705216
Gm12751	-8.26934	3.1153	892.433	4.33229e-196	-0.370346	3.1153	1.43619	0.230758	0.998198	0.0018018	0	0.252916
Gm12758	0.0296148	4.83274	0.189637	0.663219	-0.0172563	4.83274	0.0643368	0.799768	-0.0104145	0.016656	0.677391	0.810595
Gm12781	-1.07283	3.98236	81.1277	2.11591e-19	0.218496	3.98236	3.36503	0.0665944	0.349776	0.0796772	0	0.0794004
Gm12798	-4.16278	2.95389	348.675	8.23562e-78	-0.0344468	2.95389	0.030566	0.861212	0.884448	-0.0137737	0	0.868482
Gm12841	0.0804592	4.48536	1.60198	0.205623	-0.00689973	4.48536	0.0117624	0.913635	-0.0295896	0.00575962	0.226557	0.917731
Gm12854	-0.430276	5.20658	70.5254	4.54387e-17	-0.0351172	5.20658	0.468769	0.493554	0.146105	0.00451168	0	0.514737
Gm12870	-0.554213	3.22519	25.9924	3.42764e-07	-0.0631934	3.22519	0.336296	0.561975	0.187864	0.0231638	4.05145e-06	0.581213
Gm12909	0.798232	4.82843	47.9506	4.3709e-12	-0.0728812	4.82843	0.403942	0.52506	-0.254595	-0.0641541	0	0.545297
Gm12978	0.266615	6.12883	33.6459	6.61129e-09	0.0322098	6.12883	0.491096	0.483439	-0.0920348	-0.0208749	0	0.504771
Gm12992	0.261075	6.13604	32.5164	1.1819e-08	0.0268946	6.13604	0.345095	0.556903	-0.0901865	-0.0208005	0	0.576477
Gm12999	0.0294009	3.04814	0.0754435	0.78357	0.182641	3.04814	2.89227	0.0890054	-0.013115	0.0272085	0.792274	0.104066
Gm13063	-0.0436097	2.93887	0.120248	0.728766	-0.104848	2.93887	0.699053	0.403102	0.00339818	-0.0281459	0.740225	0.425877
Gm13202	0.596883	2.28806	11.1129	0.000857308	0.0697311	2.28806	0.156481	0.692418	-0.200567	0.0957293	0.00138155	0.707181
Gm13388	0.328541	2.42718	1.92569	0.165231	-0.207214	2.42718	0.756419	0.384451	-0.11511	0.0421105	0.184183	0.406835
Gm13456	0.996248	6.01321	365.042	2.24796e-81	-0.00315842	6.01321	0.00367473	0.951662	-0.332688	0.0149566	0	0.954312
Gm13509	-2.82276	4.71558	1003.54	3.05176e-220	-0.101344	4.71558	1.21764	0.269823	0.750169	0.00242247	0	0.292438
Gm13613	4.54224	5.99319	3916.43	0	0.0211566	5.99319	0.0712829	0.789478	-0.919193	0.0014248	0	0.800859
Gm13680	-1.43466	5.53659	360.28	2.44681e-80	-0.151318	5.53659	4.05392	0.0440689	0.45465	-0.03824	0	0.0540302
Gm13771	-8.63048	6.29368	2530.47	0	-0.33314	6.29368	1.88662	0.169583	0.995292	-0.000839413	0	0.191391
Gm13775	1.92372	6.20246	95.2054	1.71618e-22	-0.0915181	6.20246	0.23067	0.631027	-0.529437	0.055921	0	0.647985
Gm13784	-0.499271	4.11419	21.63	3.3064e-06	0.0754941	4.11419	0.493604	0.482324	0.17354	0.0706771	4.05145e-06	0.50362
Gm13789	0.00988556	3.00244	0.00820416	0.927829	-0.0184916	3.00244	0.0284629	0.866025	0.000511792	0.000337486	0.93117	0.872934
Gm13824	0.586273	3.47058	8.6523	0.00326649	-0.251542	3.47058	1.60727	0.204875	-0.178435	-0.0526879	0.00465107	0.227165
Gm13826	-0.662006	2.99079	34.2062	4.95716e-09	0.0408291	2.99079	0.129556	0.718893	0.221016	-0.0164255	0	0.732474
Gm13829	-0.0948499	3.03111	0.911348	0.339757	-0.0294179	3.03111	0.0877955	0.766999	0.0331501	-0.0132149	0.363286	0.779435
Gm13872	0.608133	6.4786	105.043	1.1951e-24	-0.0127818	6.4786	0.0466159	0.82906	-0.206399	-0.0236753	0	0.838315
Gm14011	-0.485246	2.62379	13.3718	0.000255431	-0.133838	2.62379	1.01959	0.312617	0.150452	-0.0123817	0.00044566	0.335659
Gm14256	0.00840626	4.01396	0.00439958	0.947116	-0.243884	4.01396	3.76314	0.0523941	-0.00615414	-0.0251579	0.950062	0.0635025
Gm15133	4.33931	3.23624	94.0041	3.14871e-22	0.0880874	3.23624	0.0072564	0.932115	-0.851566	0.0550866	0	0.935468
Gm15135	-0.313025	3.47314	8.67356	0.00322859	0.0995094	3.47314	0.876269	0.349225	0.110048	0.00376836	0.00459435	0.372211
Gm15270	0.458125	3.3924	10.9663	0.000927822	-0.118115	3.3924	0.733003	0.391912	-0.151658	-0.0253064	0.00144232	0.414403
Gm15283	0.130881	4.73664	2.25219	0.133425	-0.047418	4.73664	0.295454	0.586746	-0.0479382	-0.0146112	0.151379	0.605093
Gm15347	1.17029	3.96602	157.423	4.13774e-36	-0.0786112	3.96602	0.70921	0.399706	-0.383693	-0.0085708	0	0.422226
Gm15350	1.35365	4.49312	239.649	4.69157e-54	0.0351339	4.49312	0.158962	0.690114	-0.438272	-0.00891774	0	0.70501
Gm15351	4.83437	2.36096	128.314	9.58429e-30	-0.281545	2.36096	0.323603	0.569451	-0.918419	0.00188204	0	0.588567
Gm15353	5.5635	3.00439	223.974	1.22926e-50	-0.166728	3.00439	0.161848	0.687461	-0.950213	-0.00431916	0	0.702567
[truncated: 3,486 more rows]

## Sheet: LIV_HighFat
genes	AG_logFC	AG_logCPM	AG_LR	AG_pval	PO_logFC	PO_logCPM	PO_LR	PO_pval	AGE	POE	AG_adj_pval	PO_adj_pval
0610008F07Rik	-0.877909	3.01167	20.8746	4.90349e-06	-0.100563	3.01167	0.278373	0.597769	0.300869	-0.000809008	7.97308e-06	0.624718
0610009B22Rik	0.0844068	5.70309	1.09673	0.294985	-0.0622055	5.70309	0.595585	0.440268	-0.0308101	-0.0553335	0.326115	0.473723
0610009O20Rik	-0.0485932	7.02465	0.788574	0.374532	0.0251327	7.02465	0.210947	0.646026	0.0167264	-0.0139559	0.406593	0.669808
0610010K14Rik	0.225834	4.62479	3.44635	0.0633914	-0.0324347	4.62479	0.0709801	0.789915	-0.080548	0.0281519	0.0806903	0.804739
0610012H03Rik	0.102404	4.6195	1.51731	0.218028	0.0328251	4.6195	0.155751	0.693099	-0.0352057	0.0166588	0.247936	0.714061
0610038P03Rik	0.00297832	2.51418	0.000302067	0.986133	-0.123204	2.51418	0.546949	0.459567	-0.00953008	-0.0354077	0.987137	0.492213
0610043K17Rik	-2.30812	4.28534	242.051	1.40474e-54	0.0275189	4.28534	0.0318499	0.858357	0.652027	-0.0286808	0	0.869034
1100001G20Rik	-0.201256	11.805	24.9712	5.81937e-07	-0.0355866	11.805	0.781341	0.376731	0.0699953	-0.00615362	0	0.411472
1110004E09Rik	0.156437	5.47761	2.0866	0.148597	-0.121612	5.47761	1.26015	0.261623	-0.0530147	0.0213851	0.17515	0.295235
1110008F13Rik	0.0296177	8.43417	0.442285	0.506022	-0.0256894	8.43417	0.332748	0.564045	-0.00993738	0.00259252	0.535427	0.592368
1110032A03Rik	0.516316	6.0867	21.9594	2.78482e-06	-0.112128	6.0867	1.0381	0.308265	-0.175539	0.00150416	2.65769e-06	0.343159
1110034G24Rik	-2.57819	3.53189	224.695	8.55703e-51	-0.0431734	3.53189	0.055838	0.813199	0.713019	-0.0272999	0	0.826588
1110035H17Rik	0.360972	2.56061	1.77287	0.183028	0.0740446	2.56061	0.0780497	0.779958	-0.100951	0.105682	0.211555	0.795304
1110038B12Rik	-0.34795	4.18389	6.38613	0.0115015	-0.18989	4.18389	1.90163	0.167896	0.120221	0.0160846	0.0166239	0.197645
1110057K04Rik	-0.203632	6.70254	11.007	0.000907689	-0.154466	6.70254	6.33488	0.0118386	0.0691879	-6.02601e-06	0.00144579	0.0172856
1110059E24Rik	0.334183	5.70343	26.9667	2.06994e-07	-0.0914218	5.70343	2.01712	0.155534	-0.11356	-0.00689306	0	0.18416
1110059G10Rik	0.500327	3.77992	12.1039	0.000503173	0.0362584	3.77992	0.0631208	0.80163	-0.169075	-0.0608853	0.000855778	0.815846
1190002N15Rik	-0.43709	7.49627	44.123	3.08382e-11	-0.0633537	7.49627	0.928828	0.335168	0.150583	0.0188755	0	0.370211
1200014J11Rik	0.132663	2.5973	0.520025	0.470831	0.404999	2.5973	4.83001	0.0279685	-0.0214782	0.156298	0.501332	0.0380715
1300002K09Rik	-0.539336	8.94798	124.66	6.04065e-29	0.0092581	8.94798	0.0369165	0.847635	0.184978	-3.50675e-05	0	0.858924
1300017J02Rik	0.0702804	9.37571	2.7162	0.0993345	0.0273169	9.37571	0.410383	0.521775	-0.024083	-0.00854148	0.121279	0.552141
1500011K16Rik	-1.06127	2.73137	27.0117	2.02225e-07	-0.460822	2.73137	5.04203	0.0247395	0.340058	-0.111517	0	0.034077
1500017E21Rik	6.23065	3.00584	369.953	1.91627e-82	0.774792	3.00584	2.97314	0.0846574	-0.974945	0.00807775	0	0.105417
1600002H07Rik	0.0800128	2.44644	0.17908	0.672165	0.178656	2.44644	0.892759	0.344731	-0.010631	0.0241211	0.693044	0.379649
1600012H06Rik	0.071612	2.53324	0.132055	0.716311	0.229911	2.53324	1.36837	0.242092	-0.0300272	-0.009453	0.734778	0.275502
1600014C10Rik	-0.00985512	8.94359	0.0551071	0.814403	0.0158656	8.94359	0.142823	0.70549	0.0038294	-0.0143884	0.826673	0.725827
1700001C19Rik	-0.0160058	4.0078	0.0218049	0.882607	-0.206612	4.0078	3.61767	0.0571689	0.00622317	-0.0216742	0.890955	0.0737298
1700012B15Rik	0.0153594	4.36343	0.0122445	0.91189	0.0404015	4.36343	0.0843088	0.771541	-0.00920871	-0.0123675	0.918401	0.787262
1700016P03Rik	0.26982	2.42938	1.93547	0.164161	0.0785138	2.42938	0.162559	0.686811	-0.0835574	0.0232705	0.191625	0.70818
1700019G17Rik	1.0228	3.18145	40.0788	2.43927e-10	-0.10983	3.18145	0.458849	0.498162	-0.335971	-0.0387642	0	0.529453
1700020I14Rik	0.105699	7.53086	4.75017	0.0292954	0.0319476	7.53086	0.433964	0.51005	-0.0363143	0.00983424	0.0397963	0.540679
1700021K19Rik	0.0662812	6.34797	0.922115	0.33692	0.009482	6.34797	0.0188649	0.890754	-0.0225552	-0.00698428	0.368891	0.899255
1700022I11Rik	0.367623	7.27035	54.0917	1.91347e-13	0.00330429	7.27035	0.00436653	0.947314	-0.126336	0.00322949	0	0.951654
1700023H06Rik	0.218072	2.60068	1.27372	0.259069	0.248184	2.60068	1.64999	0.198961	-0.063903	0.0540454	0.28967	0.230768
1700024P16Rik	-0.695294	3.53108	9.70217	0.0018405	-0.0198073	3.53108	0.00768261	0.930154	0.216681	0.0784658	0.00289423	0.935445
1700025G04Rik	-0.00286454	4.35329	0.000500927	0.982144	-0.0416379	4.35329	0.107379	0.743149	-0.00336323	-0.0512129	0.983488	0.761084
1700034J05Rik	0.47947	3.27956	6.1521	0.0131256	-0.331857	3.27956	2.94401	0.0861966	-0.159267	-0.13713	0.0189201	0.107206
1700049G17Rik	-0.135913	3.34274	0.650084	0.420083	-0.054211	3.34274	0.103704	0.747429	0.0508215	-0.0271766	0.451526	0.765092
1700064H15Rik	0.352393	2.89928	3.69968	0.054423	-0.191277	2.89928	1.08853	0.296796	-0.129896	0.0487373	0.0700834	0.331404
1700066M21Rik	0.159204	4.37618	1.7244	0.189127	0.0532941	4.37618	0.193048	0.660392	-0.0531644	-0.0291197	0.218093	0.68332
1700080G11Rik	-4.59298	2.68567	201.408	1.02937e-45	-1.5133	2.68567	17.0434	3.65359e-05	0.881423	-0.0117613	0	6.37847e-05
1700120E14Rik	0.45958	2.88506	4.47838	0.0343263	-0.354509	2.88506	2.66312	0.102699	-0.157054	-0.0203762	0.0457309	0.126124
1700121F15Rik	0.0933512	2.84983	0.311231	0.576926	0.0740554	2.84983	0.195481	0.658393	-0.0310637	-0.00983672	0.60323	0.681449
1700123O20Rik	0.111957	5.00942	1.29511	0.255109	-0.0526349	5.00942	0.28606	0.592756	-0.0362705	-0.00333571	0.285636	0.620075
1810019J16Rik	0.205061	3.20081	1.27844	0.258189	0.0480737	3.20081	0.0705107	0.790595	-0.0685948	-0.0726752	0.28883	0.805305
1810024B03Rik	-2.12667	2.92551	71.7662	2.42263e-17	-0.0396745	2.92551	0.0183467	0.892256	0.620297	0.0203487	0	0.900674
1810032O08Rik	-0.608521	3.35571	16.5115	4.83555e-05	-0.0417507	3.35571	0.0780985	0.779891	0.210571	0.036674	7.97308e-05	0.795259
1810037I17Rik	0.51146	5.93561	29.779	4.84221e-08	0.0492666	5.93561	0.277009	0.598668	-0.172908	0.0599542	0	0.625531
1810058I24Rik	-0.642699	6.20468	92.9247	5.43214e-22	0.046228	6.20468	0.481148	0.487903	0.220172	0.0238855	0	0.519454
1810059H22Rik	-1.14277	2.52785	24.2846	8.31016e-07	0.115027	2.52785	0.250432	0.616771	0.351712	-0.0875896	0	0.642721
2010012P19Rik	-1.08027	2.58974	9.75825	0.00178519	-0.344449	2.58974	0.970066	0.324664	0.333466	-0.0374405	0.00282247	0.359682
2010107G23Rik	-0.737114	3.70961	28.4196	9.76718e-08	-0.0875929	3.70961	0.396697	0.5288	0.253838	-0.00416356	0	0.558855
2210015D19Rik	-0.541072	5.2674	25.5104	4.39998e-07	-0.168252	5.2674	2.47104	0.115961	0.181736	-0.0259169	0	0.141023
2210016F16Rik	-0.10337	2.70004	0.236402	0.626817	-0.00962102	2.70004	0.00216956	0.962849	0.0403111	0.0569002	0.650045	0.965952
2310030G06Rik	-0.195064	3.77795	2.09805	0.147487	-0.169721	3.77795	1.58806	0.207604	0.0643661	-0.00958897	0.173978	0.239995
2310039H08Rik	-0.416353	6.63789	43.3278	4.62961e-11	-0.0394642	6.63789	0.389607	0.532506	0.142264	-0.0140998	0	0.562294
2310047M10Rik	-0.062416	3.44812	0.107877	0.742574	-0.0986919	3.44812	0.270209	0.603191	0.0276536	0.115403	0.759766	0.629897
2310061I04Rik	-0.000656253	4.29549	2.40408e-05	0.996088	-0.00971351	4.29549	0.00532515	0.941827	0.0023623	0.0411162	0.996335	0.946376
2310067B10Rik	0.14365	3.43977	1.27832	0.258212	-0.209932	3.43977	2.73173	0.0983725	-0.044631	-0.0242252	0.288857	0.121231
2410002F23Rik	-1.61415	4.92404	300.113	3.11317e-67	0.0821806	4.92404	0.760789	0.383082	0.508504	0.058965	0	0.417646
2410004N09Rik	0.161487	4.61624	2.01702	0.155544	-0.0192407	4.61624	0.0285366	0.865853	-0.0586237	0.0422055	0.182459	0.875987
2410017I17Rik	0.0775341	4.95575	0.266053	0.605992	-0.126401	4.95575	0.707747	0.400193	-0.0235599	-0.0466367	0.630184	0.434488
2410127L17Rik	-0.478569	4.29853	12.6402	0.000377534	0.133064	4.29853	0.978987	0.322449	0.161464	0.0768569	0.000632531	0.357614
2410131K14Rik	-0.968205	4.19911	71.4124	2.89841e-17	0.00285965	4.19911	0.000618678	0.980156	0.325251	0.000643203	0	0.981638
2510009E07Rik	-0.864875	3.61957	39.1648	3.89508e-10	-0.0842426	3.61957	0.368382	0.543888	0.292847	-0.0232008	0	0.5731
2510049J12Rik	-0.34266	3.22068	4.61686	0.0316591	0.0304321	3.22068	0.036437	0.848616	0.12102	0.0454321	0.0426082	0.8599
2610002J02Rik	-0.494402	3.42037	7.97327	0.00474731	-0.353726	3.42037	4.07666	0.0434794	0.173175	0.0475752	0.00712794	0.057183
2610019F03Rik	-1.79698	5.23644	224.9	7.7202e-51	0.0498151	5.23644	0.17642	0.674468	0.550599	0.0734934	0	0.696738
2610203C22Rik	-0.630128	2.48728	13.1271	0.000291056	0.0399118	2.48728	0.0538507	0.816493	0.228133	0.0446001	0.000510277	0.829573
2610206C17Rik	-0.358443	4.87529	16.8319	4.08408e-05	0.0968697	4.87529	1.22866	0.267667	0.124138	0.0612448	7.17577e-05	0.3016
2610301B20Rik	-0.233609	3.78152	2.91612	0.0876986	0.0147134	3.78152	0.0116692	0.913977	0.0813867	0.0667027	0.108006	0.920466
2610507B11Rik	-0.111515	7.08547	4.29787	0.03816	0.0483597	7.08547	0.808364	0.368604	0.0382883	-0.00871484	0.0506158	0.403483
2610528J11Rik	0.251213	2.67302	1.16748	0.279919	-0.249512	2.67302	1.14578	0.284433	-0.0876759	0.0147589	0.31073	0.318679
2700060E02Rik	0.0161343	7.7172	0.0928651	0.760566	0.0064603	7.7172	0.0148901	0.902879	-0.00543062	0.0160884	0.776594	0.910282
2700062C07Rik	-8.54445	3.7911	691.812	1.80397e-152	0.774752	3.7911	2.74806	0.0973726	0.997449	0.00255102	0	0.120133
2700089E24Rik	-0.379663	8.26502	80.5232	2.87313e-19	-0.0133443	8.26502	0.0995876	0.752325	0.131011	-0.00329591	0	0.769626
2700097O09Rik	0.47225	3.24825	6.4711	0.0109642	0.51319	3.24825	7.63063	0.00573854	-0.173798	0.000561222	0.0159143	0.00871724
2810007J24Rik	-4.64853	6.1142	1438.39	0	-0.0791596	6.1142	0.375781	0.53987	0.92348	-0.00961837	0	0.569275
2810025M15Rik	-2.13024	4.39869	178.975	8.11399e-41	0.423283	4.39869	7.13128	0.00757506	0.613219	0.00547471	0	0.0113643
2810055G20Rik	-0.130908	2.55161	0.167962	0.681929	0.0427259	2.55161	0.0181792	0.892746	0.0356366	0.061191	0.702434	0.901089
2810403A07Rik	-0.349149	4.54259	8.08847	0.00445479	0.0155253	4.54259	0.0161692	0.898815	0.11608	0.00472061	0.00667081	0.906622
2810459M11Rik	0.0647089	2.70119	0.0982877	0.753894	-0.0801451	2.70119	0.149712	0.698811	-0.028712	-0.00717537	0.770311	0.719478
2900097C17Rik	0.539436	4.80119	33.8044	6.09418e-09	0.00949745	4.80119	0.0105922	0.918028	-0.184341	0.00704397	0	0.924304
3010026O09Rik	0.266549	3.42752	1.27301	0.259203	0.207726	3.42752	0.768984	0.380532	-0.0996438	-0.122262	0.289811	0.415148
3110001D03Rik	-0.100721	4.72837	1.00993	0.314921	-0.00550031	4.72837	0.0030089	0.956255	0.0372789	-0.00625063	0.346574	0.959778
3110002H16Rik	0.607099	5.34821	23.4298	1.29554e-06	-0.0410975	5.34821	0.107616	0.742875	-0.199764	0.032843	2.65769e-06	0.760757
3110040N11Rik	-0.320953	4.89008	8.11144	0.00439867	-0.011799	4.89008	0.0109793	0.916549	0.107169	-0.0169264	0.0065964	0.922948
3110043O21Rik	0.473668	5.95624	40.3417	2.13212e-10	-0.0296257	5.95624	0.158097	0.690914	-0.162422	-0.0590046	0	0.711991
3110056K07Rik	-0.233296	6.35649	12.5835	0.000389176	-0.0563513	6.35649	0.734251	0.391509	0.0812529	0.0058625	0.00065645	0.425856
3110082I17Rik	0.786636	4.51591	52.9935	3.34653e-13	0.0153364	4.51591	0.0199015	0.887813	-0.262061	-0.0215175	0	0.896541
4632415L05Rik	0.789908	2.79339	13.1842	0.000282315	-0.034326	2.79339	0.0242249	0.876314	-0.266571	0.0251735	0.000502304	0.885608
4632427E13Rik	-0.00257349	4.11219	0.000345762	0.985164	-0.00962069	4.11219	0.0048035	0.944745	0.00283937	0.0892235	0.986262	0.949254
4632428N05Rik	-0.337815	4.19597	10.9973	0.000912433	-0.114341	4.19597	1.25783	0.262062	0.112957	-0.0631626	0.00145907	0.295679
4732447D17Rik	-0.312226	2.6404	1.87995	0.17034	0.110432	2.6404	0.235779	0.627271	0.112815	-0.0370914	0.198187	0.652581
4833420G17Rik	-1.54512	6.62065	652.476	6.46665e-144	0.0674607	6.62065	1.24534	0.264443	0.488936	0.020577	0	0.29831
4833422C13Rik	0.0311899	4.40422	0.0897156	0.764539	-0.18942	4.40422	3.30742	0.0689676	-0.0114832	-0.0370465	0.780371	0.0874461
4922501C03Rik	-0.594562	4.03224	28.7539	8.21825e-08	-0.0341407	4.03224	0.0947611	0.758209	0.198968	-0.00318683	0	0.77505
4930422G04Rik	0.237311	2.77142	1.41725	0.233857	0.237216	2.77142	1.41605	0.234054	-0.0871415	0.0862703	0.264021	0.267178
4930423O20Rik	0.237426	4.94457	6.62483	0.0100567	0.007096	4.94457	0.00587366	0.93891	-0.0827127	-0.0489551	0.0145881	0.943646
4930430F08Rik	-0.379962	3.2068	3.75661	0.0525992	0.20153	3.2068	1.05952	0.303324	0.133876	0.123645	0.0679705	0.338197
4930442L01Rik	0.0232864	3.08478	0.0120383	0.912632	0.034329	3.08478	0.0258975	0.872151	-0.00494197	0.0223636	0.919073	0.881828
4930447A16Rik	-0.391845	4.22136	6.62744	0.0100419	-0.0607774	4.22136	0.158763	0.690298	0.134609	-0.0300161	0.0145748	0.711483
4930506C21Rik	0.409286	8.22166	90.2369	2.1128e-21	-0.0401857	8.22166	0.871246	0.35061	-0.140191	0.0111705	0	0.38544
4930506M07Rik	0.178566	5.17195	3.92818	0.0474832	-0.0206309	5.17195	0.0524764	0.818809	-0.0612064	-0.00589899	0.061919	0.831709
4930523C07Rik	-0.619809	4.05332	10.8986	0.000962389	-0.0806913	4.05332	0.186279	0.666032	0.190825	-0.0407309	0.00154678	0.688739
4930558J22Rik	0.0386232	4.95916	0.247612	0.618762	-0.00728129	4.95916	0.00879459	0.925284	-0.0164133	-0.00451492	0.642498	0.93103
4930581F22Rik	-0.161954	6.70846	7.56843	0.00593995	-0.0363785	6.70846	0.381873	0.536603	0.0558861	-0.0309815	0.00883949	0.566177
4931406C07Rik	0.525661	2.74081	9.91511	0.00163927	-0.0928274	2.74081	0.30695	0.579558	-0.178664	0.0510377	0.00253278	0.607403
4931406P16Rik	-0.0951999	6.52966	2.07381	0.149846	-0.0371602	6.52966	0.315926	0.574067	0.0333012	-0.0133269	0.176495	0.602016
4931414P19Rik	0.511783	2.68693	4.0812	0.0433628	-0.257858	2.68693	1.01959	0.312616	-0.181096	0.0323246	0.056973	0.34756
4931422A03Rik	0.0375135	4.92971	0.133283	0.715052	0.0482439	4.92971	0.220366	0.638761	-0.0162772	-0.0209432	0.733646	0.663068
4932438A13Rik	-0.176458	6.69202	7.06957	0.0078404	0.0806688	6.69202	1.47754	0.22416	0.0616647	0.0163692	0.0114972	0.256959
4932442E05Rik	0.263744	4.34752	7.66824	0.00562011	-0.0286179	4.34752	0.0900327	0.764136	-0.0910218	-0.00141853	0.00836642	0.780451
4932702P03Rik	-0.46557	5.49342	32.3454	1.29065e-08	-0.129106	5.49342	2.48742	0.114759	0.162173	0.0129747	0	0.139694
4933415D12Rik	0.287904	3.0776	2.35295	0.125046	-0.348932	3.0776	3.45417	0.0630923	-0.0958241	-0.0802755	0.149828	0.0807062
4933427D14Rik	0.221054	3.1271	1.11838	0.290267	0.0631904	3.1271	0.0919788	0.761676	-0.073657	0.0409251	0.321321	0.7783
5031439G07Rik	0.106063	7.39313	4.49018	0.03409	0.0174488	7.39313	0.121544	0.727366	-0.0359837	0.0179997	0.0454545	0.746408
5033411D12Rik	0.250954	6.24428	11.3122	0.000769999	0.0654416	6.24428	0.76935	0.380418	-0.0860895	0.0222624	0.00125709	0.415026
5330430P22Rik	0.0137527	3.55857	0.0071273	0.93272	-0.054622	3.55857	0.11281	0.736967	0.00409203	0.0648987	0.937518	0.755309
5330438D12Rik	-0.413108	2.03504	2.79783	0.094392	-0.627763	2.03504	6.50344	0.0107666	0.129555	-0.0231107	0.115732	0.0158957
5430405H02Rik	-1.59978	3.8951	144.605	2.62055e-33	-0.100156	3.8951	0.552775	0.457186	0.503286	-0.00283474	0	0.489962
5430417L22Rik	-0.322123	3.08576	3.62222	0.0570126	0.160966	3.08576	0.905053	0.34143	0.103262	0.0450875	0.0731079	0.37633
5730455P16Rik	-0.288538	2.72354	2.08578	0.148676	-0.270606	2.72354	1.83544	0.175486	0.10631	-0.0191642	0.17523	0.205719
5730508B09Rik	-0.806983	2.70033	19.5629	9.73411e-06	0.122135	2.70033	0.44257	0.505885	0.268538	-0.0140055	1.06308e-05	0.536812
5830417I10Rik	-2.41265	4.21204	207.719	4.32084e-47	-0.148302	4.21204	0.79023	0.374031	0.677996	-0.0139979	0	0.408873
5830473C10Rik	-0.230504	6.17198	9.0737	0.00259312	-0.134411	6.17198	3.08631	0.0789536	0.0791518	-0.0711446	0.00405298	0.0988928
6330408A02Rik	-0.132364	2.63253	0.516975	0.472135	0.0818518	2.63253	0.197941	0.656388	0.0666328	0.138533	0.502679	0.679495
6330416G13Rik	0.233368	4.85336	4.13685	0.0419593	-0.0573594	4.85336	0.249681	0.6173	-0.0792332	-0.0350086	0.0552056	0.643226
6430550D23Rik	-0.068216	3.93542	0.222967	0.636788	0.00083022	3.93542	3.42321e-05	0.995332	0.0258766	-0.0156158	0.659693	0.995782
6820431F20Rik	0.324053	2.87865	1.5436	0.214083	-0.0506251	2.87865	0.0385284	0.844386	-0.109773	-0.0399925	0.24396	0.855799
8430408G22Rik	-0.340601	7.52208	36.3615	1.63912e-09	-0.0445756	7.52208	0.623332	0.429812	0.118171	0.000554559	0	0.463481
8430419L09Rik	0.471377	6.97272	64.267	1.08649e-15	0.0412396	6.97272	0.492994	0.482595	-0.159647	0.0289566	0	0.514338
9030025P20Rik	-2.30339	3.0605	72.982	1.30841e-17	0.0162208	3.0605	0.00513754	0.942859	0.654365	0.072977	0	0.947396
9030617O03Rik	-0.144467	7.39532	6.16124	0.013058	0.0576339	7.39532	0.980773	0.322008	0.0502166	0.0343613	0.0188377	0.357144
9030622O22Rik	-1.58782	4.30727	30.4979	3.34226e-08	0.343006	4.30727	1.45133	0.228314	0.459547	0.214818	0	0.261299
9130401M01Rik	-0.617117	4.64514	30.3952	3.52397e-08	-0.111566	4.64514	0.993232	0.318954	0.206353	-0.0125264	0	0.354122
9130409I23Rik	-0.802922	2.94227	18.7706	1.47423e-05	0.216749	2.94227	1.37718	0.240582	0.266784	0.0869307	2.92346e-05	0.273918
9230112E08Rik	0.330481	3.28469	4.80251	0.0284184	-0.00343412	3.28469	0.000547647	0.98133	-0.121329	0.0336827	0.0387704	0.982696
9330160F10Rik	-0.362201	3.03272	3.33052	0.0680054	-0.109708	3.03272	0.305557	0.580419	0.127163	0.122862	0.0858196	0.608211
9330162012Rik	0.596248	6.06575	60.2806	8.22533e-15	-0.0643801	6.06575	0.703966	0.401454	-0.201066	0.0251839	0	0.435774
9430008C03Rik	-0.353103	4.64397	12.8823	0.000331709	-0.0312809	4.64397	0.100636	0.751068	0.132001	0.0273572	0.000571404	0.768499
9430015G10Rik	0.0047085	4.94852	0.00222009	0.962419	-0.00185167	4.94852	0.00033647	0.985365	-0.00222494	-0.000961812	0.96512	0.986451
9430016H08Rik	-0.2128	2.78069	0.987644	0.320319	-0.0254314	2.78069	0.0139213	0.906077	0.0622498	-0.0937358	0.352115	0.913277
9430038I01Rik	0.257246	3.46433	1.60685	0.204935	-0.28999	3.46433	2.041	0.153109	-0.0936579	0.0226219	0.23443	0.181513
9630033F20Rik	0.436792	4.84283	20.6119	5.62469e-06	0.0186422	4.84283	0.0374173	0.846618	-0.148846	0.000203892	7.97308e-06	0.857962
9830147E19Rik	0.0990368	3.16505	0.211864	0.64531	-0.2364	3.16505	1.20837	0.271656	-0.0287564	-0.0532908	0.667512	0.30555
a	-0.5758	2.33367	2.44863	0.117627	-0.225416	2.33367	0.370102	0.542949	0.212621	0.177731	0.14161	0.57221
A130010J15Rik	-0.79654	3.47157	9.512	0.00204133	-0.331607	3.47157	1.65431	0.198373	0.254609	0.125934	0.00318923	0.230162
A1bg	3.67213	9.59639	322.495	4.14454e-72	0.116617	9.59639	0.408927	0.522515	-0.818831	-0.0076618	0	0.552872
A230083G16Rik	0.0615207	2.72183	0.126409	0.722185	0.084658	2.72183	0.239323	0.624695	-0.0202625	-0.00844871	0.740484	0.650263
A2m	6.51	5.09395	87.518	8.35143e-21	-0.596734	5.09395	0.758568	0.383777	-0.959879	-0.00335745	0	0.418292
A430005L14Rik	0.125277	4.40769	1.82029	0.177279	-0.0621847	4.40769	0.448337	0.503126	-0.0388785	-0.00945175	0.205371	0.534212
A430105I19Rik	-0.892821	3.49327	23.4063	1.31147e-06	0.0266858	3.49327	0.0199023	0.88781	0.296874	0.0308297	2.65769e-06	0.896536
A530032D15Rik	0.114084	3.09532	0.211248	0.645791	-0.0674839	3.09532	0.0755182	0.783466	-0.0387283	-0.18358	0.668014	0.798821
A530054K11Rik	-0.994783	3.94981	42.7378	6.259e-11	-0.0908607	3.94981	0.357124	0.550108	0.32056	-0.0333352	0	0.57909
A530084C06Rik	-0.161963	3.22392	0.887324	0.346203	0.27364	3.22392	2.54324	0.110767	0.0544076	0.0608186	0.378206	0.135184
A630007B06Rik	0.129049	5.54094	2.44408	0.117969	0.071903	5.54094	0.758611	0.383764	-0.0447745	0.0264527	0.142003	0.418265
A630076J17Rik	2.14605	5.21045	185.508	3.04006e-42	0.0284798	5.21045	0.0341512	0.853386	-0.617377	0.00510029	0	0.864521
A730061H03Rik	0.255729	3.66228	3.33942	0.0676384	0.0724542	3.66228	0.267634	0.604924	-0.0924737	0.0501339	0.0854289	0.631569
A830010M20Rik	0.189413	2.72673	0.649847	0.420167	0.00745457	2.72673	0.00114045	0.97306	-0.0606751	-0.0239938	0.451577	0.975267
A830073O21Rik	1.18239	2.7758	27.3055	1.7372e-07	0.163477	2.7758	0.526245	0.46819	-0.372738	0.00016312	0	0.500579
A930005H10Rik	-0.398244	2.26483	3.09121	0.0787161	-0.0988838	2.26483	0.194719	0.659017	0.133282	-0.014147	0.0980822	0.681967
A930015D03Rik	-1.19201	4.19323	96.6303	8.35613e-23	0.118469	4.19323	0.947285	0.330411	0.382086	-0.0435238	0	0.365374
A930028C08Rik	0.0619015	4.45222	0.347321	0.555633	-0.116436	4.45222	1.23027	0.267355	-0.020964	-0.0483569	0.583056	0.301274
A930033H14Rik	-0.249997	4.76115	6.47418	0.0109453	0.0387505	4.76115	0.154919	0.693878	0.0834678	0.00195983	0.0158824	0.714819
AA987161	-0.361892	2.57432	3.32198	0.0683595	-0.0872007	2.57432	0.193077	0.660368	0.136953	0.0641908	0.0861917	0.683296
Aacs	-0.355878	6.52638	36.0482	1.92495e-09	0.0123874	6.52638	0.0438775	0.834082	0.120031	-0.0214743	0	0.845987
Aadat	-0.081125	7.2907	1.61376	0.203965	0.00121423	7.2907	0.000361945	0.984821	0.0271147	-0.0108946	0.233423	0.985999
Aaed1	-0.0776055	5.44992	0.998954	0.317564	0.138351	5.44992	3.17585	0.0747345	0.0245986	0.00156219	0.34933	0.0941116
Aagab	-0.0588998	3.99415	0.172357	0.678025	-0.165339	3.99415	1.35941	0.24364	0.0245016	-0.0353202	0.698785	0.276993
Aak1	-0.0478094	4.59439	0.104631	0.746342	-0.295982	4.59439	4.01181	0.0451825	0.0160078	-0.0178076	0.763277	0.0592799
Aamp	-0.432951	6.09276	33.1298	8.62079e-09	-0.021893	6.09276	0.0848342	0.77085	0.148304	-0.00494505	0	0.786659
Aar2	0.0524479	5.77274	0.463879	0.495816	-0.0557252	5.77274	0.523674	0.469279	-0.0190962	-0.00274488	0.525745	0.501523
Aars2	0.032023	4.51014	0.0764789	0.782127	0.0567903	4.51014	0.240514	0.623835	-0.0123865	0.0345194	0.79662	0.649386
Aarsd1	-0.279974	5.05099	10.4309	0.00123924	0.0149301	5.05099	0.0296858	0.863205	0.0974892	-0.0177972	0.00199593	0.873488
Aasdh	-0.234014	4.02765	3.75345	0.0526988	0.0555131	4.02765	0.211477	0.645612	0.0824833	0.00811447	0.0680875	0.669428
Aasdhppt	5.71403	2.32389	259.233	2.52139e-58	0.00601404	2.32389	4.09918e-05	0.994892	-0.971138	-0.0121956	0	0.995378
Aass	-0.0348229	10.3492	0.558815	0.454738	0.0465866	10.3492	1.00015	0.317275	0.0124576	0.0268163	0.485601	0.352389
Aatf	-0.293628	5.33024	10.2052	0.00140049	0.0245168	5.33024	0.0711257	0.789705	0.100357	-0.0103621	0.00220057	0.80458
AB099516	-0.74084	3.14856	1.94493	0.163134	-0.637778	3.14856	1.45808	0.227236	0.18662	-0.488061	0.190597	0.260162
Abca3	-0.44495	7.8385	56.2639	6.33679e-14	-0.0395253	7.8385	0.44504	0.5047	0.153412	0.000734026	0	0.535669
Abca5	0.820138	5.06015	63.237	1.83276e-15	0.0841438	5.06015	0.665299	0.414695	-0.275976	-0.030447	0	0.448807
Abca6	0.0143951	10.5039	0.133123	0.715216	-0.00548123	10.5039	0.0192992	0.889512	-0.0046965	-0.0097572	0.733797	0.898157
Abcb10	0.00716975	4.61182	0.00329812	0.954203	0.0148628	4.61182	0.0140752	0.905561	-0.00738058	-0.110489	0.957469	0.912769
Abcb11	1.35896	9.21404	694.575	4.52234e-153	0.0317495	9.21404	0.38991	0.532347	-0.437861	0.0177789	0	0.562148
Abcb1a	-1.25045	5.84341	79.9079	3.92274e-19	0.0284883	5.84341	0.0420955	0.837438	0.385618	-0.0330258	0	0.849051
Abcb1b	1.14763	4.12263	26.2006	3.07729e-07	0.266122	4.12263	1.41424	0.234353	-0.355466	0.0735212	0	0.267516
Abcb4	-0.171098	10.7545	15.0832	0.000102873	-0.0373232	10.7545	0.718109	0.396765	0.0594474	-0.00632155	0.000196669	0.431123
Abcb6	0.0231073	7.27595	0.197635	0.656637	-0.0365026	7.27595	0.493189	0.482508	-0.00743282	-0.0131915	0.678342	0.514274
Abcb8	0.091955	6.32874	2.61929	0.105572	-0.0771249	6.32874	1.84247	0.174662	-0.0327648	-0.0213096	0.128143	0.204836
Abcc3	-0.690054	10.7123	287.535	1.71306e-64	0.00376843	10.7123	0.00865358	0.925884	0.234929	0.00250838	0	0.931599
Abcc9	0.222746	8.14669	17.0005	3.73697e-05	-0.00997541	8.14669	0.0341088	0.853475	-0.0765645	-0.0102768	7.17577e-05	0.864601
Abcd2	-0.676541	6.18398	23.7781	1.08106e-06	-0.0987997	6.18398	0.511741	0.474386	0.237611	-0.0214894	2.65769e-06	0.506405
Abcd3	-0.188221	11.1923	23.5776	1.19975e-06	-0.00730073	11.1923	0.0354957	0.850561	0.0654658	0.00713411	2.65769e-06	0.861803
Abcf1	0.419267	5.37822	19.8617	8.32515e-06	0.0414629	5.37822	0.194561	0.659148	-0.144285	0.0388954	7.97308e-06	0.682084
Abcf2	-0.0978289	5.89626	0.894521	0.344255	-0.00699421	5.89626	0.00456188	0.94615	0.0339914	0.0521317	0.376306	0.950593
Abcg1	-0.141965	5.67187	2.58979	0.107554	-0.164832	5.67187	3.49131	0.0616918	0.0497716	0.00799909	0.130456	0.0790584
Abhd10	1.3771	3.35223	103.279	2.91062e-24	-0.111323	3.35223	0.652799	0.419114	-0.441344	0.0195513	0	0.453132
Abhd15	-0.239762	5.51372	7.91702	0.0048972	-0.0375499	5.51372	0.194268	0.659388	0.0821903	0.0340081	0.00734852	0.682305
Abhd16a	0.2554	7.71223	4.22653	0.0397967	-0.0360303	7.71223	0.0842419	0.771629	-0.0850343	0.0307478	0.0526223	0.787358
Abhd17b	0.654531	5.09743	35.5932	2.43129e-09	-0.0529264	5.09743	0.233676	0.628812	-0.217449	-0.0623948	0	0.653976
Abhd17c	0.165144	6.7147	5.39078	0.0202434	-0.0886729	6.7147	1.5547	0.212443	-0.0563173	0.0408818	0.0285277	0.244798
Abhd2	0.159812	8.30563	14.5611	0.000135688	0.00543406	8.30563	0.0168443	0.896736	-0.0553025	-0.0123416	0.000247166	0.9047
Abhd6	8.36387	5.04173	1538.46	0	0.674526	5.04173	2.5571	0.1098	-0.995134	0.00372937	0	0.134123
Abi2	0.442313	2.28722	2.36612	0.123995	-0.132131	2.28722	0.205559	0.650271	-0.183334	-0.153086	0.148725	0.673856
Abi3	0.197169	3.05578	1.05295	0.304828	0.314838	3.05578	2.6828	0.101437	-0.0626599	0.153934	0.336182	0.124696
Abi3bp	0.886501	6.04069	89.5716	2.95733e-21	0.130173	6.04069	1.94316	0.163325	-0.295929	0.0225781	0	0.192701
Ablim1	0.0142202	7.58738	0.0550576	0.814485	-0.0223575	7.58738	0.136037	0.712253	-0.00550452	-0.0192757	0.826734	0.732181
Ablim3	0.313702	6.61476	6.51084	0.0107219	0.0739182	6.61476	0.362034	0.547379	-0.104714	0.00862032	0.0155316	0.576435
Abr	-0.0900887	3.75841	0.443596	0.505392	0.000663557	3.75841	2.30759e-05	0.996167	0.0224069	-0.0373899	0.534861	0.996479
Abracl	-0.213746	4.7953	4.77321	0.0289058	0.0543174	4.7953	0.3083	0.578725	0.0674544	-0.0366704	0.0393206	0.606582
Abt1	0.266612	4.67134	7.37929	0.00659791	0.0324181	4.67134	0.109275	0.740971	-0.09005	-0.00958904	0.00981221	0.758913
Abtb1	0.213986	4.32572	3.19653	0.0737947	0.0122001	4.32572	0.010468	0.918508	-0.072627	0.00567889	0.0923256	0.924835
Abtb2	0.18532	3.72456	1.15183	0.283166	-0.322178	3.72456	3.47226	0.0624058	-0.0641084	0.0244098	0.313935	0.0799727
AC020971.1	0.673945	2.25099	7.16554	0.00743172	0.0453634	2.25099	0.0342924	0.853086	-0.227509	-0.00033065	0.0109178	0.864258
AC025622.1	0.833318	2.77703	31.6634	1.83342e-08	0.0747151	2.77703	0.248812	0.617913	-0.275853	0.0482639	0	0.643829
AC079245.1	0.269173	3.54896	3.40628	0.0649488	-0.050526	3.54896	0.120206	0.728812	-0.0923708	-0.0566232	0.0824337	0.747713
AC087901.1	-0.197478	2.00848	0.459952	0.497646	0.106747	2.00848	0.131815	0.716558	0.0707396	0.121892	0.527457	0.73616
AC098726.1	-0.0221518	4.32523	0.0369133	0.847642	0.0342188	4.32523	0.0883152	0.76633	0.00359749	0.00341451	0.858068	0.782601
AC099934.1	0.455322	3.14417	1.36051	0.243449	0.184131	3.14417	0.229092	0.632198	-0.131395	-0.0403659	0.273828	0.657203
AC108401.1	0.0806303	5.08147	0.84659	0.357519	0.0027006	5.08147	0.000955157	0.975345	-0.0271509	-0.0244669	0.389916	0.97725
AC110382.1	0.133354	2.44223	0.501989	0.478627	-0.0718691	2.44223	0.145094	0.703268	-0.0515146	0.0655413	0.509028	0.723605
AC117213.1	0.241557	3.93928	3.88576	0.0486972	0.122254	3.93928	0.994807	0.31857	-0.08741	-0.0678286	0.0633435	0.353787
AC120136.1	0.16956	3.60748	1.75461	0.185299	0.0557057	3.60748	0.189461	0.663365	-0.0539199	0.0246442	0.214125	0.686227
AC120176.1	0.0784966	4.01547	0.512758	0.473948	0.0462947	4.01547	0.178352	0.672794	-0.0207626	0.018907	0.504412	0.695242
AC121292.1	8.08418	5.67159	363.629	4.5648e-81	0.652002	5.67159	2.4024	0.121149	-0.991584	0.00625246	0	0.146766
AC122247.1	-0.80916	2.77261	16.2756	5.47643e-05	0.0824268	2.77261	0.166323	0.6834	0.28648	0.0537256	8.50462e-05	0.705017
AC122371.1	0.107746	4.52195	1.20503	0.272318	-0.0450953	4.52195	0.211117	0.645893	-0.0358847	-0.00165921	0.303163	0.669651
AC122821.1	-0.475401	2.73932	4.95574	0.0260043	0.243911	2.73932	1.29727	0.254713	0.189576	0.137541	0.0357672	0.288206
AC125374.1	-0.207853	2.76202	0.877673	0.34884	-0.168462	2.76202	0.579756	0.446408	0.0578987	-0.0779006	0.380922	0.479714
AC130214.1	0.442497	3.67372	8.79404	0.00302216	0.00222819	3.67372	0.000230521	0.987886	-0.146116	0.0335574	0.0046297	0.988843
AC131759.1	-0.0153195	4.41372	0.0132281	0.908434	-0.0925797	4.41372	0.484059	0.48659	0.00565077	-0.0315319	0.915071	0.518232
AC131780.1	1.04051	3.85275	14.7545	0.000122454	-0.368368	3.85275	1.85695	0.172977	-0.329809	0.0337394	0.000231219	0.203159
AC132347.1	0.855378	4.20883	40.5517	1.91482e-10	-0.143445	4.20883	1.14186	0.285259	-0.28331	-0.0308082	0	0.319574
AC133183.2	0.021848	6.02722	0.0866795	0.768442	0.0253591	6.02722	0.116974	0.73234	0.0069199	0.048048	0.784046	0.751033
AC133646.1	-0.150641	2.8575	0.801397	0.370676	-0.102362	2.8575	0.37048	0.542743	0.0578782	0.0138271	0.40288	0.572053
AC136008.1	-0.385492	2.77935	4.95246	0.0260536	0.537681	2.77935	9.65413	0.00188926	0.156187	0.119848	0.0358204	0.00299788
AC136215.1	1.01798	4.90987	89.6523	2.83925e-21	0.0981398	4.90987	0.833551	0.361248	-0.332964	0.046534	0	0.396023
AC138214.1	0.877257	2.77666	31.7861	1.72119e-08	0.166852	2.77666	1.12906	0.287977	-0.287744	-0.0106095	0	0.322376
AC140312.1	-1.18437	3.01023	40.7501	1.72999e-10	-0.0104231	3.01023	0.00335529	0.953808	0.378565	-0.0262752	0	0.957546
AC140333.2	-0.183077	2.74977	0.679759	0.40967	-0.0283637	2.74977	0.0167021	0.897171	0.0826307	0.157763	0.441276	0.905134
AC140392.1	0.0317218	4.83264	0.13358	0.714749	-0.0445418	4.83264	0.263534	0.607703	-0.0130832	-0.053167	0.733393	0.634277
AC140413.1	-0.557196	2.32592	5.49983	0.0190183	-0.099522	2.32592	0.16389	0.6856	0.192266	-0.0343911	0.0269676	0.707026
AC141882.1	0.136026	2.27372	0.298287	0.584958	-0.458575	2.27372	3.45012	0.0632471	-0.0745906	-0.222693	0.610823	0.0808843
AC144852.1	-0.122978	3.46392	0.537371	0.463525	-0.121217	3.46392	0.522463	0.469793	0.0445138	0.0297653	0.494209	0.502023
AC147987.1	-1.05939	4.19094	71.9869	2.1663e-17	-0.131043	4.19094	1.09578	0.295195	0.350015	0.00741595	0	0.329719
AC149055.1	0.225567	7.64166	24.4973	7.44123e-07	0.0259507	7.64166	0.324359	0.568999	-0.0773545	-0.0193142	0	0.597189
AC153382.1	-0.454748	2.47924	5.74867	0.0165012	0.0267736	2.47924	0.0211398	0.884399	0.149965	-0.00751764	0.0235498	0.893256
AC153506.1	-0.909911	2.99802	28.1144	1.1435e-07	-0.075276	2.99802	0.19282	0.66058	0.309096	-0.0316108	0	0.683495
AC153860.1	0.0201682	3.28824	0.0150166	0.90247	0.15283	3.28824	0.841016	0.359106	-0.0136664	0.0200809	0.909532	0.393772
AC154200.1	0.830951	3.29545	19.1428	1.21294e-05	0.0543162	3.29545	0.0806817	0.776376	-0.262374	-0.0648576	1.86039e-05	0.791937
AC154625.1	-0.123478	3.01354	0.543627	0.460934	-0.0066129	3.01354	0.00149479	0.969159	0.0462713	-0.122699	0.491554	0.971805
AC154766.1	0.375013	2.8707	3.5642	0.059038	0.16368	2.8707	0.675911	0.410998	-0.14081	-0.0411737	0.0755955	0.445262
AC155158.1	4.14948	3.64663	66.9195	2.82825e-16	-0.396168	3.64663	0.693212	0.405074	-0.849437	-0.021445	0	0.439383
AC155921.1	-0.259078	2.88067	2.18597	0.139273	-0.126858	2.88067	0.522468	0.469791	0.0804887	-0.0771319	0.165388	0.502023
AC158595.1	2.21376	3.02404	76.5033	2.19843e-18	-0.533051	3.02404	4.38443	0.0362685	-0.645057	-0.0700814	0	0.0483993
AC158662.1	-0.15382	3.25933	0.664108	0.415113	-0.275991	3.25933	2.13972	0.143528	0.0475602	-0.111951	0.446719	0.171182
AC158993.1	0.475245	3.32763	3.37584	0.0661589	0.00194104	3.32763	4.1812e-05	0.994841	-0.137691	-0.0370523	0.083813	0.99533
AC159323.1	-0.178626	3.32601	1.81515	0.177892	-0.142459	3.32601	1.15439	0.282632	0.0632566	0.0584375	0.20599	0.316808
AC161602.1	0.143502	6.49312	5.50847	0.0189246	-0.0947147	6.49312	2.39993	0.12134	-0.0486228	-0.00673788	0.0268268	0.146997
AC163296.1	0.680039	3.66275	20.12	7.27339e-06	0.238467	3.66275	2.47274	0.115836	-0.224211	0.00377017	7.97308e-06	0.140845
AC164597.1	0.998491	2.44317	19.9866	7.79883e-06	-0.176038	2.44317	0.598077	0.439313	-0.343772	0.0111717	7.97308e-06	0.472881
AC165433.1	-0.348498	5.48747	22.726	1.86822e-06	-0.0619763	5.48747	0.718616	0.396598	0.120849	-0.0107755	2.65769e-06	0.430972
AC167018.1	0.131208	3.70866	0.186772	0.665617	-0.0226013	3.70866	0.00576995	0.939451	-0.0480593	-0.141438	0.686833	0.944165
AC170752.1	0.821461	3.51976	28.5256	9.24691e-08	0.00138302	3.51976	6.21114e-05	0.993712	-0.278798	-0.0506749	0	0.994323
Acaa1a	0.167464	9.71128	12.6381	0.000377962	0.0232589	9.71128	0.243912	0.621395	-0.0574818	-0.00852282	0.000632531	0.647053
Acaa1b	0.981746	12.3434	381.691	5.33107e-85	0.0426788	12.3434	0.734543	0.391415	-0.326038	-0.00916502	0	0.425765
Acaa2	-0.00580804	11.8003	0.0225814	0.880551	-0.0277269	11.8003	0.514628	0.473142	0.00236762	-0.00483855	0.888999	0.505206
Acaca	-0.0734094	8.57231	2.36912	0.123757	0.0106271	8.57231	0.0496645	0.823648	0.0260667	0.010395	0.1484	0.83631
Acacb	-0.0526901	8.33512	0.840785	0.359172	-0.086488	8.33512	2.26472	0.13235	0.019994	0.0138514	0.391553	0.159066
Acad10	-1.34676	7.14859	363.462	4.96361e-81	-0.0220103	7.14859	0.098843	0.753222	0.432929	-0.00965345	0	0.770508
Acad11	-0.190031	9.9756	21.4003	3.72707e-06	0.0215913	9.9756	0.276435	0.599048	0.0660738	0.00429381	5.31539e-06	0.625879
Acad12	-1.721	5.76987	237.105	1.68251e-53	0.039017	5.76987	0.125292	0.723364	0.527288	0.00476399	0	0.742602
Acad8	-0.0963583	5.78046	1.24941	0.263665	0.0524021	5.78046	0.369465	0.543296	0.0352485	0.0359712	0.294433	0.572568
Acadl	0.123018	7.55029	3.65797	0.0558017	0.0339197	7.55029	0.278165	0.597907	-0.0404542	0.0251755	0.0716886	0.624869
Acads	-0.139526	8.6577	11.4584	0.000711732	-0.00424851	8.6577	0.0106248	0.917902	0.0486045	0.0066794	0.0011747	0.9242
Acadvl	0.0560512	6.97292	0.711227	0.399037	0.0377835	6.97292	0.323268	0.56965	-0.0166097	0.0271537	0.430881	0.5978
Acap1	-0.449963	3.34408	4.93454	0.026325	0.0530508	3.34408	0.0686941	0.793248	0.154676	0.103834	0.0361393	0.807796
Acap2	0.316103	3.72316	5.06951	0.0243503	0.248436	3.72316	3.13331	0.0767077	-0.107398	0.0208994	0.0336783	0.096352
Acap3	-0.0335588	4.01011	0.0416725	0.838245	-0.202546	4.01011	1.53184	0.215836	0.00282299	-0.0494136	0.849109	0.248393
Acat2	-0.737327	3.28378	9.72242	0.00182034	-0.0477963	3.28378	0.0415514	0.838477	0.22819	-0.0170285	0.00286765	0.85001
Acat3	-0.115075	5.28196	2.10012	0.147288	-0.068573	5.28196	0.745659	0.387854	0.0405196	-0.00331385	0.173763	0.422337
Acer2	-0.101345	5.46612	1.54893	0.213294	0.110264	5.46612	1.83394	0.175663	0.0347653	0.015628	0.243184	0.205921
Acin1	0.081229	5.63841	1.12946	0.28789	0.159299	5.63841	4.34455	0.0371277	-0.0278626	0.0210163	0.318716	0.049481
Acly	0.201702	8.34339	21.4141	3.70045e-06	0.00419698	8.34339	0.00927598	0.923273	-0.0690409	0.00905848	5.31539e-06	0.929218
Acmsd	-0.0494017	4.20581	0.0995248	0.752401	-0.0547157	4.20581	0.122666	0.72616	0.0175242	0.0188695	0.768929	0.7453
Acn9	0.0237114	2.89993	0.0215711	0.883234	-0.0705491	2.89993	0.190045	0.662879	0.00143663	0.0297752	0.891526	0.68577
Acot1	0.879631	6.39361	145.699	1.51052e-33	0.0676202	6.39361	0.865486	0.352208	-0.292494	0.0079405	0	0.386944
Acot11	-1.4055	6.04794	358.164	7.06859e-80	0.0751671	6.04794	1.0268	0.310912	0.452231	0.0132136	0	0.345824
Acot12	-0.0866202	5.80483	1.37324	0.241256	0.0349177	5.80483	0.223156	0.636646	0.0318795	0.0361576	0.271616	0.661187
Acot13	-0.715584	6.67571	155.829	9.22658e-36	0.0438775	6.67571	0.586063	0.443945	0.245377	0.0148642	0	0.47733
Acot2	0.308611	5.05645	13.5356	0.000234082	-0.0792254	5.05645	0.891202	0.345152	-0.107221	-0.0261524	0.000425231	0.380133
Acot3	-0.0703964	7.52977	1.17149	0.279096	0.0387698	7.52977	0.355686	0.550912	0.0449556	0.0428567	0.309895	0.579829
Acot4	-0.138467	6.83623	4.89927	0.0268681	-0.0180116	6.83623	0.0829209	0.773377	0.0556241	0.0170225	0.0368038	0.789016
Acox1	0.0262697	10.7474	0.444238	0.505084	0.0143036	10.7474	0.131705	0.716671	-0.00877188	-0.00656054	0.534561	0.736248
Acp1	0.149015	3.0037	0.515332	0.47284	-0.0276332	3.0037	0.0176546	0.894296	-0.06692	-0.135397	0.503394	0.902574
Acp2	0.0445123	5.09743	0.210776	0.64616	-0.153269	5.09743	2.50141	0.113745	-0.0105718	0.00617713	0.668344	0.138604
Acp6	0.533025	4.93917	25.5606	4.28696e-07	0.0131574	4.93917	0.0155681	0.900704	-0.179737	0.0127229	0	0.908323
Acpl2	-0.917399	5.59428	122.207	2.07997e-28	-0.0159108	5.59428	0.0367137	0.848049	0.309006	-0.0219701	0	0.859315
Acrbp	-0.145824	5.12164	3.30472	0.0690813	0.00893505	5.12164	0.0124329	0.911218	0.0509421	-0.0145391	0.0870289	0.917941
Acsf2	1.53537	7.1852	507.761	1.94722e-112	-0.0504098	7.1852	0.559663	0.454396	-0.484906	-0.0140538	0	0.487442
Acsl1	-0.122671	11.0554	9.03544	0.00264795	2.91777e-05	11.0554	4.9638e-07	0.999438	0.0428428	0.00179157	0.00411411	0.999429
Acsl3	-0.738747	3.94294	21.2926	3.94259e-06	-0.181088	3.94294	1.2789	0.258104	0.242193	0.0683345	5.31539e-06	0.291592
Acss2	0.0151549	6.74165	0.045935	0.830294	-0.0296861	6.74165	0.176187	0.67467	-0.00592434	-0.0386777	0.841532	0.696935
Acss3	-1.05956	6.87505	184.097	6.17995e-42	-0.0563503	6.87505	0.528251	0.467343	0.344206	-0.0320499	0	0.499758
Actl6a	-0.323918	5.41277	15.5819	7.90054e-05	0.0786206	5.41277	0.918595	0.337844	0.110301	0.00504913	0.000143515	0.372843
Actn1	0.355726	6.42296	27.9521	1.24353e-07	0.0501351	6.42296	0.555694	0.456	-0.121624	-0.024164	0	0.488878
Actr10	0.22246	5.26185	4.69786	0.0302003	0.0963606	5.26185	0.881854	0.347694	-0.0765634	-0.00756579	0.040862	0.382551
Actr2	-0.251488	7.30989	21.006	4.57846e-06	0.0666213	7.30989	1.475	0.224558	0.0862222	-0.0161151	7.97308e-06	0.257358
Actr3	0.01027	5.57468	0.0165846	0.897531	-0.0260248	5.57468	0.106569	0.744084	-0.00233548	-0.0105516	0.904783	0.761966
Actr5	-0.527685	4.76233	33.9234	5.73265e-09	0.0218742	4.76233	0.0582709	0.80925	0.181273	-3.10488e-05	0	0.822817
Acvr2b	0.722677	2.9539	17.5239	2.83722e-05	-0.105267	2.9539	0.370702	0.542622	-0.232719	-0.0334897	5.58116e-05	0.57192
Acvrl1	-0.0982257	4.25113	0.870939	0.350695	0.0605132	4.25113	0.330879	0.565142	0.0303796	0.027306	0.382782	0.593367
Acyp2	0.626174	2.35476	8.08644	0.00445977	0.0340673	2.35476	0.0202026	0.886973	-0.216973	-0.0164964	0.00667081	0.8958
Adal	0.42776	6.18535	26.6488	2.44003e-07	-0.0561533	6.18535	0.460121	0.497567	-0.145179	0.0186034	0	0.528873
Adam11	-0.179612	4.80949	1.97009	0.160438	-0.0101964	4.80949	0.00636987	0.936387	0.0582799	0.0146369	0.187702	0.94126
Adam17	-8.87826	3.35824	545.155	1.42534e-120	-0.0806139	3.35824	1.41638e-10	0.999991	1	0	0	0.99971
Adam19	0.273199	2.64243	2.21456	0.136714	-0.323259	2.64243	3.0993	0.0783261	-0.0899343	-0.0814106	0.162483	0.0981673
Adam23	0.336217	5.00647	9.50387	0.00205039	0.189397	5.00647	3.01806	0.0823419	-0.111267	0.0188959	0.00320252	0.102781
Adamts10	0.0763553	3.14549	0.0948918	0.758048	0.0989549	3.14549	0.158065	0.690945	-0.0273486	0.0275862	0.774325	0.71201
Adamts13	2.33268	7.16874	1257.18	2.28228e-275	0.106681	7.16874	2.69928	0.100394	-0.667149	0.00366851	0	0.123556
Adamts2	0.303735	3.42603	2.61499	0.105858	0.0694173	3.42603	0.136196	0.712093	-0.106817	0.0469128	0.128484	0.732041
Adamts9	-0.0318953	4.31886	0.113005	0.736749	0.0165619	4.31886	0.0304892	0.861385	0.0075166	0.0107051	0.754317	0.871835
Adamtsl2	0.436981	4.29909	10.1741	0.00142425	-0.0891391	4.29909	0.423697	0.515098	-0.148466	0.0741303	0.00223246	0.545723
Adap2	-0.716102	2.51306	6.92749	0.00848806	0.037193	2.51306	0.0184069	0.892081	0.22866	-0.089852	0.01243	0.900512
Adat1	-0.0289719	2.71528	0.0236218	0.877851	0.406373	2.71528	4.54207	0.0330717	0.0114564	0.0510122	0.886453	0.044442
Adck1	-0.0584554	5.01676	0.305656	0.580358	0.0116538	5.01676	0.012167	0.912168	0.0193825	-0.0122876	0.606488	0.918866
Adck5	0.182253	3.61575	0.760982	0.383021	-0.12808	3.61575	0.374058	0.540801	-0.0685737	-0.0401787	0.415164	0.570102
Adcy3	-1.08614	2.86175	32.7619	1.04167e-08	-0.274061	2.86175	2.06499	0.150716	0.359982	-0.0276182	0	0.178924
Adcy7	-0.551148	4.04329	13.972	0.000185558	-0.0237838	4.04329	0.0260343	0.871817	0.186475	0.0147208	0.000358789	0.881544
Adcy9	0.0871987	5.57573	1.12625	0.288578	-0.107126	5.57573	1.69953	0.19235	-0.029153	-0.010203	0.319415	0.223757
Add1	0.0628442	5.55883	0.491058	0.483456	0.020928	5.55883	0.0544779	0.815447	-0.0223262	0.00363795	0.513905	0.828629
Adh1	0.577618	11.2816	122.468	1.82326e-28	-0.0689968	11.2816	1.75827	0.184841	-0.19633	-0.0509087	0	0.215842
Adh4	0.490388	8.73557	129.563	5.10693e-30	-0.0238075	8.73557	0.306365	0.57992	-0.167406	0.00962391	0	0.607738
Adh5	5.25088	10.7443	5450.22	0	-0.11026	10.7443	3.15811	0.0755505	-0.948299	-0.00425127	0	0.0950737
Adh7	1.52054	2.70141	59.5845	1.17156e-14	-0.071871	2.70141	0.138191	0.710086	-0.482571	0.0674726	0	0.730127
Adhfe1	-0.898464	3.92722	47.8844	4.52111e-12	-0.246594	3.92722	3.58915	0.0581578	0.29289	-0.0244155	0	0.0748194
Adipor1	0.248836	2.47242	1.7215	0.189501	0.0939477	2.47242	0.246024	0.619889	-0.0802729	0.0159608	0.218462	0.645594
Adipor2	-0.427325	9.03366	101.006	9.17066e-24	0.0091559	9.03366	0.0465098	0.829252	0.147412	0.00857305	0	0.841442
Adk	0.175585	10.5686	10.6821	0.0010818	0.10449	10.5686	3.78435	0.0517339	-0.0600127	-0.00278592	0.00174876	0.0673353
Adora1	-0.821629	4.0341	35.5367	2.50291e-09	0.11943	4.0341	0.751051	0.386144	0.274255	0.00867718	0	0.420676
Adrbk2	-0.200172	3.42547	1.42617	0.23239	-0.121106	3.42547	0.521261	0.470304	0.0682934	-0.0216751	0.26258	0.502466
Adss	0.0686066	5.69222	0.898132	0.343283	0.0386589	5.69222	0.285138	0.593353	-0.0230541	0.000587741	0.375235	0.620617
Aebp2	-1.02296	5.58211	154.615	1.69975e-35	0.154458	5.58211	3.52673	0.0603867	0.34143	0.0401996	0	0.0774798
Aen	-0.0767516	3.11458	0.289144	0.59077	0.312973	3.11458	4.80187	0.0284289	0.0276736	0.0483185	0.616152	0.0386402
Afap1l1	-0.275952	3.91058	5.62801	0.0176757	-0.0413556	3.91058	0.126542	0.722044	0.0974638	0.00740548	0.0250913	0.741303
Aff4	-0.160669	6.13139	5.65674	0.0173884	-0.0575677	6.13139	0.726147	0.394135	0.0548554	-0.0401647	0.0247139	0.428545
Afm	0.133671	8.00775	7.98021	0.00472914	0.0449051	8.00775	0.900856	0.342552	-0.0444472	0.0295146	0.00708276	0.377382
Afp	-0.423532	5.02526	1.08799	0.296917	0.147514	5.02526	0.133288	0.715047	0.120361	-0.207822	0.328026	0.734738
Aftph	0.0513816	5.88159	0.414079	0.519906	0.0516424	5.88159	0.418356	0.517759	-0.0171237	-0.015048	0.548495	0.548306
Agap1	-0.683112	2.98943	11.7578	0.000605893	-0.0537885	2.98943	0.0724344	0.787825	0.23985	-0.066043	0.00100727	0.802844
Agap3	-0.100888	5.95481	1.00085	0.317104	-0.0912138	5.95481	0.818162	0.365718	0.0331577	-0.0166066	0.348889	0.400512
Agfg1	0.189633	4.77334	3.86695	0.0492459	-0.228532	4.77334	5.61481	0.0178093	-0.0682883	-0.0350488	0.0640292	0.0252082
Agfg2	0.110778	6.6169	3.3057	0.06904	-0.0314484	6.6169	0.266364	0.605781	-0.0389843	0.0183615	0.086997	0.632329
Agmo	-0.153373	6.574	5.95618	0.0146658	-0.0117971	6.574	0.035257	0.851058	0.0535136	0.0180693	0.0210702	0.862281
Agpat1	-0.224984	5.05824	7.35105	0.00670237	-0.0723656	5.05824	0.759971	0.383338	0.0817945	-0.0155431	0.00992649	0.417875
Agpat4	0.344875	2.54089	1.99689	0.157623	0.147368	2.54089	0.369944	0.543035	-0.0938543	0.0565098	0.184744	0.572297
Agphd1	-0.23011	7.54679	24.7747	6.4437e-07	0.107607	7.54679	5.41933	0.019915	0.0791855	0.010531	0	0.0277649
Agps	0.0218773	5.20584	0.0479524	0.826665	0.209807	5.20584	4.41811	0.0355595	-0.00599619	0.0373868	0.838205	0.0476232
Agrn	0.409816	5.14018	19.9722	7.85763e-06	0.0898623	5.14018	0.959758	0.327248	-0.142427	-0.0108199	7.97308e-06	0.362257
Agt	-0.143257	10.6759	3.20252	0.0735248	-0.0313895	10.6759	0.153781	0.694948	0.0497623	0.0252755	0.09202	0.715855
Agxt	1.34059	3.56746	49.1524	2.36834e-12	-0.0480693	3.56746	0.0628532	0.802042	-0.425249	0.0267063	0	0.81625
Agxt2l2	0.0577539	4.43159	0.226782	0.63392	0.13884	4.43159	1.31086	0.25224	-0.0172248	-0.0167766	0.656966	0.285585
Ahcy	-6.31963	10.8969	46.5361	8.99438e-12	1.85866	10.8969	4.10998	0.042631	0.846238	-0.0632293	0	0.0561916
Ahcyl1	-0.245218	5.48178	5.82	0.0158449	0.00619682	5.48178	0.00374928	0.951175	0.0874614	0.0807605	0.0227632	0.955127
Ahdc1	-0.149518	4.93995	3.35013	0.0671996	-0.0155631	4.93995	0.0362462	0.849008	0.0543351	0.0238334	0.0849665	0.860229
Ahr	-0.136179	5.5063	3.03948	0.081262	0.0237742	5.5063	0.0926585	0.760824	0.0476733	0.0271248	0.100987	0.777514
Ahsg	0.0727947	13.7381	3.30784	0.06895	0.0149572	13.7381	0.139665	0.708614	-0.0248588	0.0154491	0.0869119	0.728742
AI413582	-0.240565	3.58843	3.12117	0.0772813	0.00555787	3.58843	0.00167334	0.96737	0.0884287	0.0337398	0.0963467	0.970042
AI464131	-0.344532	8.37679	59.263	1.37949e-14	-0.0100898	8.37679	0.0508921	0.821518	0.119102	-0.00478362	0	0.834378
AI597479	0.0734489	3.34711	0.210977	0.646003	-0.0426234	3.34711	0.0708691	0.790076	-0.0294224	-0.0763106	0.6682	0.804864
AI607873	0.0503054	3.41096	0.0643291	0.79978	0.0718847	3.41096	0.12868	0.719804	-0.0225865	0.0403839	0.813021	0.739339
AI661453	-0.113998	2.7274	0.341308	0.559075	-0.296182	2.7274	2.32381	0.127408	0.0358208	-0.0447428	0.586356	0.153665
AI987944	0.0931462	2.67429	0.255906	0.612947	-0.171243	2.67429	0.867625	0.351614	-0.0258272	0.036941	0.636813	0.38641
Aif1	0.653989	5.31733	13.0132	0.000309301	-0.0728795	5.31733	0.162808	0.686584	-0.208996	0.0738523	0.000539512	0.707914
Aifm2	-0.592768	3.46324	17.0208	3.69732e-05	0.143979	3.46324	1.00107	0.317051	0.202537	0.0187864	7.17577e-05	0.35216
Aim1l	-0.534833	4.21576	9.31779	0.00226939	0.0353149	4.21576	0.041286	0.838987	0.182526	-0.0606112	0.00349753	0.850478
Aimp1	0.332902	4.80714	11.0796	0.000872841	-0.0179735	4.80714	0.0323465	0.857269	-0.112897	0.0220179	0.0014006	0.86808
Ajuba	0.628263	2.83046	11.6592	0.000638856	-0.181093	2.83046	0.965589	0.325783	-0.211877	-0.0422395	0.00106839	0.360825
AK157302	1.42237	3.45252	100.042	1.49209e-23	-0.105358	3.45252	0.537071	0.463649	-0.453324	0.00882298	0	0.496144
Ak2	-0.00220742	9.94797	0.0030182	0.956188	-0.0197779	9.94797	0.242243	0.62259	0.00113512	-0.00198138	0.959305	0.648132
Ak4	-0.488703	7.06946	56.1432	6.73811e-14	-0.015016	7.06946	0.0532035	0.81758	0.168561	0.00829876	0	0.830591
Akap1	0.485616	7.26389	75.7996	3.13958e-18	-0.0190005	7.26389	0.116249	0.733139	-0.166138	-0.0145893	0	0.751793
Akap10	3.67832	3.86499	334.769	8.79298e-75	0.0237529	3.86499	0.01545	0.901079	-0.847667	0.0236466	0	0.908684
Akap11	-0.244565	5.04674	7.51644	0.00611382	0.0429185	5.04674	0.231256	0.630594	0.0848951	-0.00554461	0.00911058	0.655677
Akap13	-0.10266	6.93409	2.84102	0.0918856	-0.0114918	6.93409	0.0356023	0.850339	0.0358494	-0.00970321	0.112801	0.861566
Akap2	0.154658	4.13908	0.983545	0.321325	-0.0339838	4.13908	0.0472962	0.827837	-0.051454	0.0551001	0.353117	0.84011
Akap8	-0.356574	3.12073	4.65596	0.030946	0.0133708	3.12073	0.00646635	0.935908	0.119959	0.00236107	0.041779	0.940739
Akap8l	0.142235	3.42944	0.95847	0.327573	0.0501455	3.42944	0.119373	0.729715	-0.0557464	-0.00528076	0.359259	0.748542
Akap9	0.219558	7.05886	11.4459	0.000716534	-0.021084	7.05886	0.105617	0.74519	-0.0749951	0.0133892	0.00118267	0.762982
Akirin1	0.10177	4.74538	1.07477	0.299871	-0.045666	4.74538	0.216284	0.641886	-0.0380939	0.0112565	0.33104	0.665867
Akirin2	-0.0574309	4.62797	0.279347	0.59713	0.0350285	4.62797	0.103858	0.747249	0.0205222	-0.00524964	0.622044	0.764868
Akr1a1	-0.0318654	7.89892	0.387009	0.533876	-0.0118821	7.89892	0.0538312	0.816526	0.0116257	-0.000884421	0.561847	0.829605
Akr1c12	2.79164	6.6787	586.001	1.85679e-129	0.044995	6.6787	0.164471	0.685073	-0.743275	-0.0147288	0	0.706535
Akr1c13	-0.540583	7.83127	72.991	1.30245e-17	0.0385336	7.83127	0.37238	0.54171	0.184568	0.02071	0	0.571027
Akr1c14	-0.325828	10.0961	56.5972	5.3487e-14	0.0168399	10.0961	0.151452	0.697152	0.112635	-0.0171179	0	0.717947
Akr1c18	-6.95283	4.36045	245.093	3.05007e-55	-0.930336	4.36045	4.15796	0.0414393	0.976636	0.0118676	0	0.0548522
Akr1c19	-0.754544	7.21026	86.4015	1.46877e-20	0.012113	7.21026	0.0224155	0.880987	0.254571	-0.0448202	0	0.889916
Akr1c20	0.032584	9.36399	0.187105	0.665337	-0.0559284	9.36399	0.551261	0.457803	-0.0105788	-0.00622545	0.686536	0.490525
Akr1c6	0.130743	12.1371	9.58393	0.00196288	-0.0303213	12.1371	0.515636	0.472709	-0.0448834	-0.0139496	0.00309356	0.504739
Akr1e1	-0.950083	5.78927	24.3854	7.88641e-07	-0.377463	5.78927	3.89426	0.0484513	0.29816	-0.178865	0	0.0632824
Akt1	0.105633	5.66263	1.47101	0.225187	-0.0710805	5.66263	0.665994	0.414452	-0.0343194	0.0542704	0.255258	0.448555
Akt1s1	0.240352	5.82071	9.56622	0.00198191	-0.0314572	5.82071	0.163792	0.685689	-0.0828542	0.0253136	0.00311216	0.707096
Akt2	0.052342	5.29586	0.255928	0.612932	0.0286622	5.29586	0.0767559	0.781743	-0.0169889	-0.0251221	0.636797	0.797098
Akt3	-0.0105739	3.08913	0.00317644	0.955055	0.266154	3.08913	1.94823	0.162777	0.00575302	0.102918	0.958194	0.192157
Aktip	-0.621011	5.22658	59.3778	1.30129e-14	-0.179837	5.22658	4.96901	0.0258054	0.213392	0.0161247	0	0.0354058
AL607123.1	-0.144237	4.72972	1.70679	0.191402	0.00474906	4.72972	0.00185737	0.965624	0.0502994	0.0750219	0.220429	0.968496
AL627077.2	-3.81076	3.69174	314.683	2.08482e-70	0.28709	3.69174	1.65753	0.197937	0.858525	0.0492789	0	0.229715
Alad	-1.23282	7.66933	527.161	1.17107e-116	0.0522447	7.66933	0.959485	0.327317	0.402779	0.0118013	0	0.362355
Alcam	0.436227	4.92121	16.5657	4.6994e-05	0.131808	4.92121	1.5118	0.218865	-0.151164	0.0323139	7.97308e-05	0.251466
Aldh1a1	1.00514	12.8395	764.085	3.47451e-168	0.0227611	12.8395	0.399359	0.52742	-0.334153	-0.00467571	0	0.557659
Aldh1a7	-2.24594	10.0164	202.594	5.67319e-46	0.136029	10.0164	0.805412	0.36948	0.636233	-0.0108626	0	0.404342
Aldh1b1	0.15567	5.64483	3.74799	0.0528711	0.0299657	5.64483	0.138988	0.709289	-0.0530091	0.0309055	0.0683187	0.729394
Aldh2	-0.126511	10.2855	10.1838	0.0014168	-0.0169696	10.2855	0.183277	0.668572	0.0441832	-0.00432723	0.00221917	0.691221
Aldh4a1	-0.101158	7.83141	3.87982	0.0488699	0.104906	7.83141	4.1725	0.0410851	0.0353531	0.00616659	0.0635428	0.0544588
Aldh5a1	-0.12228	8.02776	4.84845	0.027671	-0.0689347	8.02776	1.541	0.214468	0.0433594	0.0114816	0.0377977	0.246993
Aldh8a1	0.287486	9.31114	51.1726	8.45913e-13	-0.0141077	9.31114	0.123374	0.725404	-0.0989066	-0.00645397	0	0.74455
Aldh9a1	0.0993187	5.63423	1.94236	0.163413	0.0298783	5.63423	0.175749	0.675052	-0.0360113	-0.028619	0.190846	0.697315
Aldoc	-1.19026	2.72218	22.9804	1.63662e-06	-0.169467	2.72218	0.462471	0.496471	0.378227	0.00256835	2.65769e-06	0.527773
Alg1	-0.536214	6.54774	50.048	1.50032e-12	0.0245321	6.54774	0.104925	0.745997	0.184143	0.0103373	0	0.763747
Alg2	0.0250695	4.94829	0.0561529	0.812683	-0.123701	4.94829	1.36234	0.243132	-0.0120328	-0.0102568	0.825185	0.27648
Alg6	-0.127665	3.6609	0.630456	0.427188	0.296684	3.6609	3.3936	0.06545	0.041248	-0.0339633	0.458676	0.0834489
Alg9	0.316007	5.74735	12.2905	0.00045527	-0.0449107	5.74735	0.248504	0.61813	-0.107275	-0.0142567	0.000770731	0.644055
Alkbh5	-0.0465212	3.46271	0.135787	0.712506	-0.0381104	3.46271	0.0912471	0.762598	0.0141082	-0.0399811	0.731443	0.77909
Alkbh6	-0.244596	5.20166	8.06998	0.00450047	0.0258103	5.20166	0.0899014	0.764303	0.0856844	0.00810341	0.00673726	0.780615
Alox5ap	-0.369514	2.678	1.01305	0.314173	0.11112	2.678	0.0921222	0.761496	0.10804	-0.0608504	0.34587	0.778136
Alpk1	0.947302	4.99804	110.366	8.14757e-26	-0.080367	4.99804	0.790209	0.374037	-0.313269	-0.00239906	0	0.408876
Alpl	-0.472298	6.77331	43.4174	4.42236e-11	0.00952456	6.77331	0.0177377	0.894049	0.162159	0.00919108	0	0.902343
Als2cl	-0.0525533	3.65439	0.12061	0.728374	0.00649392	3.65439	0.00185633	0.965634	0.0197875	0.0978814	0.746307	0.968501
Alyref	0.149406	4.14022	1.56491	0.210948	0.0187068	4.14022	0.0245142	0.875584	-0.0526682	0.0286185	0.24071	0.884932
Ambp	0.0364976	12.8665	0.849156	0.356791	-0.00659816	12.8665	0.0277527	0.867692	-0.0123013	-0.0115519	0.38919	0.877813
Ambra1	-0.341148	5.03587	9.14966	0.00248764	0.0803464	5.03587	0.507356	0.476286	0.117944	-0.0209862	0.00386163	0.508204
Amd1	-8.87577	3.35118	543.466	3.32174e-120	-0.063205	3.35118	9.64925e-11	0.999992	1	0	0	0.99971
Amdhd1	0.537745	6.8094	79.0163	6.15991e-19	-0.00268847	6.8094	0.00197451	0.964557	-0.185137	-0.0159317	0	0.96748
Amdhd2	0.135306	3.89714	0.873764	0.349915	0.0213204	3.89714	0.0215915	0.883179	-0.0464735	0.0308585	0.381988	0.892122
Amigo2	-0.457048	4.24839	15.1468	9.9468e-05	0.062399	4.24839	0.281877	0.595473	0.160563	0.0689992	0.000186039	0.622562
Ammecr1l	0.161582	4.87137	2.08821	0.14844	0.161991	4.87137	2.09787	0.147505	-0.0543296	0.0322752	0.175025	0.175466
Amotl2	-0.0550162	5.67996	0.294351	0.587446	-0.115633	5.67996	1.30031	0.254157	0.0207004	-0.00437811	0.613167	0.287594
Ampd3	-0.502102	2.74139	10.396	0.00126288	0.169969	2.74139	1.18834	0.275665	0.16327	-0.00330181	0.00202251	0.309364
Amz2	0.373328	3.21121	6.63758	0.00998494	0.0840086	3.21121	0.335173	0.562629	-0.129133	0.0437288	0.0144765	0.591023
Anapc11	-0.0092889	4.46505	0.00911135	0.923955	0.106492	4.46505	1.19814	0.273693	0.00255162	0.022187	0.929542	0.307477
Anapc13	3.80843	6.13919	975.765	3.32842e-214	-0.0626739	6.13919	0.275175	0.599881	-0.865035	-0.00573799	0	0.626682
Anapc16	0.00144708	3.98836	0.000177683	0.989365	-0.0501024	3.98836	0.208395	0.648028	-0.00149202	-0.0387558	0.990087	0.671716
Anapc5	-0.0860675	7.31022	1.10183	0.293865	0.112334	7.31022	1.87642	0.170741	0.0296531	0.0195039	0.324954	0.200768
Angel2	0.805265	6.04153	108.276	2.33809e-25	0.167445	6.04153	4.69418	0.030265	-0.269759	0.00422401	0	0.0410507
Angptl1	-0.0942495	2.80177	0.14118	0.707111	-0.139838	2.80177	0.307284	0.579352	0.0363706	-0.0485354	0.726353	0.607187
Angptl3	-0.0863051	10.9838	4.16703	0.0412179	-0.0121845	10.9838	0.0830681	0.773182	0.0301688	-0.0180554	0.0542967	0.788809
Angptl4	-0.207419	7.62565	19.3621	1.0813e-05	0.0533185	7.62565	1.27989	0.257919	0.072153	-0.00763417	1.32885e-05	0.291403
Angptl7	0.037761	4.23936	0.0288556	0.865113	-0.313346	4.23936	1.98337	0.159036	-0.0122065	-0.107	0.874573	0.188069
Ank	-0.810752	6.07113	99.8857	1.61453e-23	0.0356967	6.07113	0.193966	0.659636	0.272412	0.00232458	0	0.682554
Ank2	-3.68143	3.85839	142.121	9.14873e-33	0.305935	3.85839	1.04187	0.307388	0.841172	0.0558504	0	0.342263
Ank3	0.230896	5.42785	6.35748	0.0116887	0.0314623	5.42785	0.117826	0.731405	-0.0805285	0.0385982	0.0169029	0.750174
Ankhd1	-0.089328	4.84665	0.880007	0.3482	0.05641	4.84665	0.351617	0.553199	0.0252306	0.0367521	0.380258	0.581942
Ankib1	0.147949	5.18368	2.88162	0.089596	0.103849	5.18368	1.41954	0.233478	-0.0504278	-0.0192681	0.110286	0.26662
Ankmy2	-0.0719982	4.28036	0.26563	0.606279	-0.144045	4.28036	1.06363	0.30239	0.0184863	-0.0472946	0.630453	0.337206
Ankrd10	0.0353006	4.04846	0.029135	0.864468	0.0377693	4.04846	0.0333921	0.855006	-0.00105324	0.106488	0.873908	0.865951
Ankrd11	-0.0447755	5.33993	0.345209	0.556838	-0.178258	5.33993	5.47302	0.0193122	0.0142286	-0.0379277	0.584222	0.0270234
Ankrd13a	-0.510946	3.11306	7.85399	0.00507085	-0.170788	3.11306	0.880498	0.348065	0.1685	-0.00952006	0.00760101	0.382937
Ankrd17	0.258652	6.90148	18.0622	2.138e-05	-0.0197459	6.90148	0.105368	0.745481	-0.0887234	0.0106276	4.25231e-05	0.763255
Ankrd26	0.0608273	4.40321	0.224826	0.635387	-0.315981	4.40321	6.0585	0.0138395	-0.0185972	-0.0135332	0.658399	0.0199912
Ankrd33b	0.672393	3.84187	31.0909	2.46219e-08	0.0697336	3.84187	0.333319	0.563711	-0.226469	0.0307271	0	0.592036
Ankrd40	-3.67429	7.72272	3792.64	0	-0.0769635	7.72272	1.63417	0.201127	0.85498	0.00291189	0	0.233141
Ankrd42	-0.120566	3.43567	0.549424	0.458553	-0.285865	3.43567	3.09577	0.0784961	0.0324493	-0.065875	0.489268	0.0983932
Ankrd44	0.0298352	3.82233	0.0351309	0.851322	0.147897	3.82233	0.862896	0.35293	-0.00677561	0.0761054	0.861667	0.387641
Ankrd49	-0.115422	4.52815	1.27402	0.259014	-0.0343937	4.52815	0.113239	0.736487	0.0429187	-0.0261562	0.289606	0.75491
Ankrd50	0.100302	4.8317	1.1162	0.290737	-0.167713	4.8317	3.11949	0.0773609	-0.0338434	-0.00239313	0.321738	0.0971015
Ankrd52	-0.0980921	5.84308	1.27465	0.258897	0.105549	5.84308	1.47579	0.224434	0.0347901	0.0387911	0.289495	0.257225
Anks1	0.230375	5.94716	7.83393	0.00512744	-0.0729254	5.94716	0.785275	0.375533	-0.0779275	0.0116236	0.00767276	0.410282
Anks3	0.25343	3.89582	2.77011	0.0960393	-0.0248371	3.89582	0.0266864	0.870235	-0.0797397	-0.0109839	0.117614	0.880029
Ankzf1	0.0578482	2.47584	0.0888347	0.765664	0.128149	2.47584	0.439873	0.507184	-0.0239287	-0.105178	0.7815	0.538013
Ano1	0.235509	3.37227	2.57579	0.10851	0.184032	3.37227	1.56898	0.210355	-0.0887502	-0.0259596	0.131471	0.242775
Ano6	0.320293	5.13649	13.9902	0.000183766	0.0721262	5.13649	0.709007	0.399774	-0.109202	0.0258806	0.000358789	0.43406
Anp32a	0.0134185	3.21361	0.00501259	0.943557	0.324475	3.21361	2.94568	0.0861077	0.0104716	0.0848457	0.947798	0.107129
Anp32e	0.375809	3.82462	8.13103	0.0043514	0.034526	3.82462	0.0682548	0.793895	-0.1288	0.00876903	0.00653527	0.808441
Antxr2	-1.20106	5.18415	126.876	1.97719e-29	0.00213055	5.18415	0.00041829	0.983683	0.391829	-0.0145775	0	0.984942
Anxa1	1.97191	4.42923	157.311	4.37719e-36	0.113336	4.42923	0.52315	0.469501	-0.581492	0.0178521	0	0.50172
Anxa13	0.453378	2.50855	4.08798	0.0431892	-0.369081	2.50855	2.71318	0.0995227	-0.15061	0.134799	0.0567471	0.122533
Anxa4	-0.255429	6.79762	19.9964	7.75866e-06	0.0326278	6.79762	0.326344	0.56782	0.0890318	-0.0114814	7.97308e-06	0.596041
Anxa5	0.201606	8.16456	6.68872	0.00970249	0.149636	8.16456	3.68581	0.0548772	-0.0682467	0.020184	0.0140592	0.0710428
Anxa6	-0.0534405	8.48252	1.05279	0.304865	-0.0103355	8.48252	0.0393843	0.842689	0.019306	0.00552563	0.336228	0.854252
Anxa7	-0.312842	6.30211	18.9834	1.31862e-05	0.0169233	6.30211	0.0556937	0.813436	0.108725	0.00498362	2.12616e-05	0.826798
Aoah	0.102516	2.52481	0.245852	0.620011	0.0149105	2.52481	0.0051448	0.942819	-0.0453964	-0.0897083	0.643659	0.94734
Aox1	-0.75745	7.60337	223.877	1.29042e-50	-0.00138609	7.60337	0.000730092	0.978444	0.255778	-0.00886932	0	0.980115
Aox3	0.456306	10.263	42.373	7.54223e-11	-0.0465996	10.263	0.443521	0.505428	-0.156154	0.002885	0	0.53636
Ap1ar	0.506252	6.0009	44.9469	2.02446e-11	-0.0742661	6.0009	0.969008	0.324928	-0.170218	0.0113408	0	0.359958
Ap1b1	-0.363369	4.06235	9.47901	0.00207837	0.133632	4.06235	1.28066	0.257777	0.127204	0.0591086	0.00324504	0.291273
Ap1g2	-0.322712	4.01485	5.83878	0.0156767	0.0316449	4.01485	0.0565247	0.812076	0.114214	0.0872109	0.0225107	0.825483
Ap1m1	6.76531	3.20105	442.654	2.86259e-98	0.4957	3.20105	0.96564	0.32577	-0.985833	0.00111623	0	0.360811
Ap1s1	-0.0528425	5.06854	0.409443	0.522252	-0.0973525	5.06854	1.38968	0.238459	0.0190006	-0.0194057	0.55065	0.271731
Ap2a1	0.100678	3.05662	0.340189	0.55972	-0.450512	3.05662	6.79593	0.00913661	-0.0427416	-0.160495	0.586954	0.0135968
Ap2b1	-0.0993917	6.56899	3.37531	0.0661803	-0.0601499	6.56899	1.23615	0.266215	0.0351367	0.00282516	0.0838343	0.300109
Ap3m1	0.265661	6.95053	21.1581	4.22911e-06	-0.0905866	6.95053	2.46132	0.116681	-0.0908655	-0.00555396	7.97308e-06	0.141825
Ap4b1	-0.0513759	5.1859	0.279617	0.596953	0.0839574	5.1859	0.747165	0.387375	0.0193982	0.00568925	0.621882	0.421853
Ap4e1	-0.578726	4.32053	23.0951	1.54182e-06	-0.0148869	4.32053	0.01524	0.901751	0.198584	-0.0547193	2.65769e-06	0.909248
Ap4s1	-0.0598871	4.26393	0.237171	0.626257	-0.0995005	4.26393	0.65468	0.418444	0.021979	0.0181881	0.649525	0.45248
Ap5m1	-0.116903	5.02154	1.58687	0.207774	0.0356907	5.02154	0.147964	0.700489	0.0390009	-0.0302156	0.237438	0.721001
Apbb3	0.117102	5.59384	1.50269	0.220259	0.0577653	5.59384	0.365949	0.545221	-0.0379109	-0.0249447	0.250272	0.574426
Apcs	-1.02246	5.91925	185.658	2.81931e-42	-0.0946373	5.91925	1.59502	0.20661	0.339263	0.0250032	0	0.238977
Aph1b	-0.288734	2.6906	1.35131	0.245049	0.198582	2.6906	0.640558	0.423509	0.0713986	-0.0825175	0.27547	0.457357
Aplp2	-0.0379751	8.88422	0.888611	0.345854	-0.0197076	8.88422	0.239322	0.624696	0.0133417	-0.00742149	0.377826	0.650263
Apoa1	-0.113709	12.8666	8.6505	0.00326971	0.00381494	12.8666	0.00973982	0.921384	0.0397186	0.00404613	0.00498583	0.927525
Apoa2	0.0790489	15.21	4.04711	0.0442471	-0.00328785	15.21	0.00700213	0.933312	-0.0270394	-0.00326619	0.0580919	0.938349
Apob	-0.0745835	14.3951	3.89264	0.0484981	-0.00142868	14.3951	0.00142848	0.969851	0.026188	-1.76874e-05	0.0631202	0.972442
Apobec1	-0.241055	5.70389	7.71049	0.00549008	-0.0250648	5.70389	0.0831544	0.773067	0.0835706	-0.00458016	0.00816709	0.788689
Apoc3	-0.253944	12.2883	41.1277	1.426e-10	0.00320496	12.2883	0.00655925	0.935451	0.088112	0.0124564	0	0.940332
Apof	-0.303592	11.3188	61.0681	5.51349e-15	0.0189319	11.3188	0.237879	0.625742	0.105202	0.00590959	0	0.651196
Apoh	0.240461	11.5229	38.9973	4.24391e-10	0.00553773	11.5229	0.0207052	0.885585	-0.0827735	0.00640444	0	0.894455
Apol7d	0.00372852	2.94281	0.0004778	0.982561	-0.38203	2.94281	5.42757	0.0198212	-0.00374024	-0.0316435	0.9839	0.0276772
Apold1	-0.0576855	4.31801	0.242933	0.622096	-0.187252	4.31801	2.56361	0.109348	0.0199034	-0.0622716	0.64557	0.133554
Apom	0.396824	7.80652	38.799	4.6976e-10	0.0998545	7.80652	2.46107	0.116699	-0.136586	0.0202162	0	0.141852
Apon	0.962569	11.2716	522.725	1.08049e-115	-0.00707113	11.2716	0.0286921	0.865492	-0.321256	0.0140175	0	0.875591
App	-0.331051	6.49816	16.7924	4.17008e-05	0.00174283	6.49816	0.00046084	0.982873	0.112477	0.0101705	7.17577e-05	0.984203
Appl2	0.0535388	4.87329	0.200905	0.653991	-0.165169	4.87329	1.91365	0.166558	-0.0160377	-0.0227906	0.675876	0.196117
Aprt	-0.986944	6.09405	200.434	1.6792e-45	-0.0676466	6.09405	0.943053	0.331494	0.329609	-0.0142836	0	0.366541
Aqp4	-3.25948	3.42392	173.982	9.99085e-40	0.29383	3.42392	1.4617	0.226659	0.799079	0.0296164	0	0.259572
Aqp9	-0.278939	8.55304	45.6608	1.40609e-11	0.00513516	8.55304	0.015493	0.900943	0.0969111	0.00742418	0	0.908567
Aqr	-0.774455	4.19507	35.739	2.25605e-09	-0.0845489	4.19507	0.425874	0.51402	0.26208	0.00248219	0	0.544644
Arap1	0.108728	5.45536	1.82713	0.176466	0.0660557	5.45536	0.674311	0.411553	-0.0370917	-0.00878667	0.204571	0.445804
Arap2	-8.14322	2.6933	356.341	1.76314e-79	0.183597	2.6933	4.62608e-09	0.999946	1	0	0	0.999705
Arap3	0.0432287	3.62123	0.0817609	0.774925	-0.0316187	3.62123	0.0437264	0.834364	-0.0181982	-0.0408492	0.790122	0.846218
Arcn1	3.12799	7.52334	1430.89	0	-0.0108605	7.52334	0.0186695	0.891318	-0.792781	-0.0296263	0	0.899829
Arf1	0.0330524	6.11622	0.241038	0.623458	-0.0989462	6.11622	2.15973	0.14167	-0.0110664	-0.024965	0.646899	0.169144
Arf5	-1.32469	6.15206	353.524	7.23958e-79	0.0236534	6.15206	0.113007	0.736746	0.428435	0.00170046	0	0.755157
Arf6	-0.120365	5.63645	0.0930499	0.760335	0.193445	5.63645	0.238808	0.625068	0.0399224	0.103203	0.776392	0.650574
Arfgap1	-0.12609	5.78187	2.59859	0.106959	0.0835947	5.78187	1.14227	0.285174	0.045434	0.0298923	0.129749	0.319489
Arfgap3	0.100303	4.56431	0.483365	0.486902	0.203161	4.56431	1.99043	0.158296	-0.0304594	0.0503108	0.517304	0.187264
Arfgef1	0.0207027	6.68327	0.125963	0.722655	0.0544038	6.68327	0.869712	0.351035	-0.00683872	0.0101548	0.74088	0.385841
Arfip1	0.070217	2.41879	0.117544	0.731713	0.239449	2.41879	1.35639	0.244164	-0.0270962	-0.00550677	0.749454	0.277511
Arfip2	-0.0611487	4.05965	0.30087	0.583337	-0.049275	4.05965	0.195316	0.658528	0.0220518	-0.00820205	0.609189	0.681563
Arg1	-0.0907856	11.4113	5.61857	0.0177711	0.00328688	11.4113	0.00736563	0.931607	0.0317649	-0.000758286	0.0252321	0.936715
Arhgap1	0.298693	3.48582	2.14943	0.142622	0.402458	3.48582	3.90887	0.0480319	-0.0917629	-0.0180452	0.168899	0.0628545
Arhgap11a	0.9271	2.51853	16.5314	4.78521e-05	0.0199562	2.51853	0.00766688	0.930226	-0.297886	0.0720205	7.97308e-05	0.935524
Arhgap12	0.0921067	5.54181	0.907513	0.340775	0.00189268	5.54181	0.000385787	0.984329	-0.0293902	0.0225516	0.372622	0.985561
Arhgap15	-0.509444	2.6675	5.32017	0.02108	0.106888	2.6675	0.230829	0.63091	0.165106	-0.0575114	0.0295748	0.656009
Arhgap19	1.19014	4.16263	75.45	3.74788e-18	0.0707379	4.16263	0.265519	0.606354	-0.3799	-0.00771147	0	0.632903
Arhgap26	-0.204986	5.97617	7.10874	0.0076709	-0.0720652	5.97617	0.878735	0.348548	0.0717595	0.0184081	0.011258	0.383402
Arhgap29	-0.248042	7.67847	24.5645	7.18618e-07	0.0649747	7.67847	1.68618	0.194106	0.0864366	0.0115861	0	0.225654
Arhgap30	-0.0820519	3.99694	0.537451	0.463491	0.0983812	3.99694	0.772655	0.379397	0.0280857	-0.00169372	0.494182	0.414074
Arhgap32	0.182003	4.47755	2.58811	0.107669	-0.122748	4.47755	1.17697	0.277974	-0.067442	0.00251862	0.130575	0.311761
Arhgap44	-0.854403	2.99374	12.6732	0.000370929	-0.204922	2.99374	0.730299	0.392786	0.274517	0.0860372	0.000624558	0.427076
Arhgap5	-0.17954	4.48376	2.95275	0.0857317	0.0250105	4.48376	0.0573974	0.810658	0.0651476	0.0212065	0.105848	0.824106
Arhgap9	0.0693612	2.63859	0.0813472	0.77548	-0.226059	2.63859	0.873315	0.350039	-0.0191164	-0.206274	0.790555	0.384924
Arhgdia	0.0830602	4.36073	0.624139	0.429513	0.0748569	4.36073	0.507005	0.476438	-0.0297411	-0.0189067	0.460996	0.508366
Arhgdib	0.127317	4.51312	1.64001	0.200323	-0.0237773	4.51312	0.0573603	0.810718	-0.0463595	-0.0372192	0.229542	0.824162
Arhgef1	0.0270858	2.64105	0.00360625	0.952114	-0.262725	2.64105	0.407634	0.523173	-0.0087874	-0.0522055	0.955619	0.553491
Arhgef12	0.0302713	8.79406	0.419085	0.517394	-0.0308912	8.79406	0.436433	0.508849	-0.00996069	0.00440326	0.546095	0.539546
Arhgef15	-0.276115	4.95047	5.71642	0.016807	0.0784717	4.95047	0.461859	0.496757	0.0882657	-0.0315597	0.0239432	0.528049
Arhgef17	0.11645	3.47785	0.484338	0.486464	0.201768	3.47785	1.45139	0.228306	-0.0394629	-0.0272558	0.516903	0.261275
Arhgef2	-0.0612106	3.78579	0.190915	0.662156	0.0618523	3.78579	0.194975	0.658808	0.0169631	0.0372743	0.683447	0.681784
Arhgef26	0.0994502	5.48514	1.4446	0.229397	-0.0683784	5.48514	0.682923	0.408582	-0.0329061	-0.0153018	0.259612	0.442868
Arhgef37	1.08952	5.81481	139.676	3.13451e-32	-0.0157402	5.81481	0.0292898	0.864112	-0.35938	0.0446985	0	0.874339
Arhgef7	-0.141779	5.41809	3.26214	0.0708965	-0.0999578	5.41809	1.62135	0.202903	0.0508671	0.00317285	0.0890567	0.235039
Arid1a	-0.0975347	4.11343	0.439854	0.507193	-0.0395	4.11343	0.0725332	0.787684	0.0333967	-0.0646961	0.536567	0.802722
Arid4a	-0.219197	5.42645	5.35452	0.0206686	0.0569771	5.42645	0.362013	0.54739	0.0727454	-0.0300855	0.0290672	0.576443
Arid5b	-0.161846	5.84281	4.50122	0.0338706	0.00308528	5.84281	0.00162119	0.967883	0.0575623	-0.00373656	0.0451941	0.970574
Arl1	0.134738	6.46534	3.79907	0.051281	-0.0460473	6.46534	0.443721	0.505332	-0.0457385	0.0350644	0.0663972	0.536299
Arl15	-0.172546	4.10922	1.28138	0.257642	-0.0456593	4.10922	0.0898421	0.764378	0.0601797	0.0356122	0.288283	0.780671
Arl4c	0.583431	2.58363	7.76744	0.00531965	-0.370698	2.58363	3.1348	0.0766377	-0.185236	-0.0446092	0.00791727	0.096267
Arl4d	0.157327	6.14912	5.46684	0.0193806	-0.0177594	6.14912	0.0697116	0.791757	-0.0539937	0.0337866	0.0274088	0.806387
Arl5a	-0.410136	5.15863	25.2083	5.14597e-07	-0.124181	5.15863	2.30942	0.128592	0.138849	-0.0131751	0	0.154938
Arl6	-0.427109	3.40451	6.73947	0.00943026	-0.191801	3.40451	1.35693	0.244071	0.149102	-0.00315122	0.0136738	0.277415
Armc1	0.0110558	6.45676	0.0257673	0.87247	0.119873	6.45676	3.03054	0.081711	-0.00239312	0.00457415	0.881432	0.102111
Armc10	1.58104	6.14004	339.338	8.89142e-76	-0.0225466	6.14004	0.0701888	0.791062	-0.497305	-0.032384	0	0.805736
Armc7	0.0795593	2.86884	0.302082	0.58258	-0.016984	2.86884	0.0137845	0.906537	-0.0143661	0.0819079	0.608583	0.913657
Armc8	0.138405	4.58555	1.2583	0.261974	-0.0907622	4.58555	0.542146	0.461545	-0.0364266	-0.0275077	0.292679	0.494108
Armc9	-0.0221292	3.50292	0.0117641	0.913629	-0.037412	3.50292	0.0335445	0.854679	0.00996415	0.0344242	0.919942	0.86563
Arntl	-0.0302184	3.81717	0.0376853	0.846076	-0.384526	3.81717	6.08299	0.0136489	0.0352982	0.0758965	0.856599	0.0197414
Arpc1b	8.67021	6.59302	370.057	1.8187e-82	0.876857	6.59302	4.41325	0.0356609	-0.99352	0.00164416	0	0.0477269
Arpc2	0.0548575	4.21943	0.223045	0.636729	-0.0223612	4.21943	0.03704	0.847384	-0.0222582	-0.0496293	0.659658	0.858682
Arpc4	-0.0181914	6.53684	0.0811119	0.775796	-0.085602	6.53684	1.79618	0.180176	0.00640162	-0.00768428	0.790898	0.210869
Arpc5	0.151614	7.35403	8.82974	0.00296361	-0.0176519	7.35403	0.119724	0.729334	-0.0517228	-0.000774982	0.00453403	0.748197
Arpp19	2.81354	5.9829	1018.38	1.81237e-223	0.0471161	5.9829	0.278343	0.597789	-0.749381	0.0099747	0	0.624736
Arrb1	0.10033	4.86234	0.994616	0.318617	-0.0509435	4.86234	0.256537	0.612509	-0.0347055	-0.0107629	0.35039	0.638806
Arrb2	-0.284364	6.08044	12.7805	0.000350258	-0.0177494	6.08044	0.0498393	0.823343	0.0985026	-0.00163806	0.000597981	0.836026
Arrdc3	0.188022	5.73856	6.50253	0.0107721	-0.0463839	5.73856	0.395878	0.529226	-0.064951	0.00498522	0.0156193	0.559288
Arrdc4	0.201168	3.48911	0.891282	0.34513	0.161358	3.48911	0.567806	0.451132	-0.0762621	0.0265364	0.377103	0.48416
Arsa	-0.00993923	3.07484	0.00278968	0.957877	-0.0578646	3.07484	0.102347	0.749032	-0.0138818	-0.0201564	0.960852	0.766476
Arsb	0.569976	3.46176	9.21028	0.00240659	-0.00977757	3.46176	0.00262306	0.959154	-0.192527	-0.0459544	0.00372609	0.962489
Arsg	1.51002	5.473	88.0134	6.50126e-21	0.119388	5.473	0.56549	0.452057	-0.460206	0.0267582	0	0.485157
Arsk	0.399014	5.12146	18.3466	1.84147e-05	-0.0163201	5.12146	0.0306806	0.860955	-0.134763	-0.00328854	3.455e-05	0.871445
Art2a-ps	0.228546	2.6015	0.916376	0.338428	0.231521	2.6015	0.948042	0.330218	-0.0732445	-0.0642874	0.370387	0.365194
Art4	0.0479967	3.85734	0.109004	0.741281	-0.0306389	3.85734	0.0444102	0.833092	-0.0163007	-0.0272942	0.758509	0.845131
Asap1	-0.0737758	5.59073	0.79902	0.371387	0.0757541	5.59073	0.842556	0.358667	0.0259157	0.0303138	0.403494	0.393344
Asap3	0.249564	4.01927	2.88809	0.0892364	-0.230622	4.01927	2.47075	0.115983	-0.0769255	-0.0126853	0.109853	0.141041
Asb1	0.359667	4.56002	13.8629	0.000196645	-0.252433	4.56002	6.82593	0.00898436	-0.120336	-0.0324036	0.000382708	0.0133602
Asb13	-0.441453	6.74545	50.1149	1.45002e-12	-0.0189395	6.74545	0.0922624	0.76132	0.152407	0.0282049	0	0.777992
Asb3	-0.0921337	2.80926	0.168363	0.681571	0.0233512	2.80926	0.0106791	0.917694	0.00918707	-0.0712508	0.702158	0.924014
Ascc1	0.387788	4.48334	15.7402	7.26615e-05	-0.123411	4.48334	1.59177	0.207073	-0.133221	-0.00138278	0.000111623	0.23953
Ascc2	0.299315	4.51141	8.01907	0.00462873	-0.124976	4.51141	1.39765	0.237117	-0.104923	-0.00219442	0.00692861	0.270343
Ascc3	-0.073078	5.08067	0.834423	0.360997	0.0433378	5.08067	0.293623	0.587908	0.0243803	-0.00523552	0.393352	0.61532
Asgr1	-0.17411	9.82242	15.6402	7.66095e-05	-0.00270922	9.82242	0.00378888	0.950918	0.0604034	0.00302294	0.000135542	0.954902
Asgr2	-0.0265094	10.1477	0.425462	0.514224	0.049622	10.1477	1.49071	0.222106	0.00961843	0.0115341	0.543057	0.25487
Ash1l	0.0613529	5.62151	0.4439	0.505246	-0.00489645	5.62151	0.00283117	0.957566	-0.0210761	-0.0191635	0.534733	0.961006
Asl	-5.0471	2.87489	248.068	6.8482e-56	0.47782	2.87489	1.63275	0.201323	0.943499	0.0437194	0	0.233316
Asnsd1	0.110539	3.38007	0.578385	0.446946	0.0735912	3.38007	0.256772	0.612346	-0.0364363	-0.0288428	0.477763	0.63866
Aspdh	0.0576589	7.81842	1.25189	0.263191	0.0110678	7.81842	0.0461395	0.829923	-0.0194612	-0.00670532	0.293949	0.842051
Aspg	-0.112609	7.65155	3.75528	0.0526409	-0.00961665	7.65155	0.0273844	0.868564	0.0402581	0.0083681	0.068021	0.878612
Asph	0.264867	7.48899	21.8585	2.9352e-06	-0.0199376	7.48899	0.123932	0.724808	-0.0909753	-0.00352666	2.65769e-06	0.743926
Asrgl1	0.21754	3.43297	1.51012	0.219121	0.138277	3.43297	0.609055	0.435144	-0.0776844	0.00917801	0.249132	0.468785
Asun	-0.123542	5.5759	2.07314	0.149913	-0.0203882	5.5759	0.0564172	0.812251	0.0415145	0.000571026	0.176572	0.825666
Atad2	0.23955	4.30936	3.907	0.0480854	-0.0633692	4.30936	0.27396	0.600688	-0.0810318	0.0462417	0.0626312	0.627386
Atad3a	-9.26998	4.45277	139.715	3.07291e-32	-0.776837	4.45277	1.79336	0.180517	0.993132	0.00686813	0	0.211226
Atad5	-0.612378	3.01468	12.2299	0.000470308	0.14011	3.01468	0.636894	0.424838	0.21074	0.00314131	0.000797308	0.458657
Atat1	0.23244	4.26182	1.54845	0.213365	0.0196624	4.26182	0.0111434	0.91593	-0.0761617	0.00943279	0.243275	0.922366
Ate1	8.26129	2.78337	399.471	7.17905e-89	0.035488	2.78337	-1.19544e-10	1	-1	0	0	1
Atf1	-0.140401	4.22865	1.15429	0.282652	0.18334	4.22865	1.96986	0.160463	0.0445602	0.0136161	0.313419	0.18965
Atf2	-0.366434	3.71125	4.37661	0.0364354	-0.172665	3.71125	0.970261	0.324615	0.117568	0.0397342	0.0484046	0.359634
Atf4	0.168519	6.9709	11.7047	0.00062341	0.0754216	6.9709	2.34456	0.125721	-0.058418	0.00127096	0.00104447	0.151712
Atf5	0.502055	8.30763	54.5789	1.4933e-13	0.0330556	8.30763	0.237392	0.626096	-0.170576	-0.0110043	0	0.651531
Atf6	-0.173966	7.14315	8.49862	0.00355416	-0.0132241	7.14315	0.0490858	0.824662	0.0609771	0.0101206	0.00538715	0.837232
Atf6b	-0.00806886	5.23581	0.00567044	0.939974	0.177638	5.23581	2.74727	0.0974206	0.00191778	-0.00898017	0.944324	0.120181
Atf7ip	0.068063	6.52595	1.13091	0.287582	0.0181388	6.52595	0.0803238	0.776859	-0.0231586	0.00218212	0.318426	0.792423
Atg12	-0.22589	3.3314	2.62564	0.10515	0.152595	3.3314	1.19779	0.273763	0.0814585	0.0393749	0.127686	0.307567
Atg13	-0.489516	2.67005	4.83983	0.0278096	-0.156108	2.67005	0.495414	0.481522	0.1648	0.0412478	0.0379412	0.513355
Atg16l1	-0.0592359	4.64731	0.418174	0.51785	0.0384379	4.64731	0.176154	0.6747	0.0240889	0.0317985	0.546552	0.696972
Atg3	-0.0620779	7.12066	1.10793	0.292532	0.00241799	7.12066	0.00167905	0.967315	0.0215627	9.03453e-05	0.323609	0.970005
Atg4a-ps	-2.67736	4.6512	353.926	5.91779e-79	-0.115251	4.6512	0.641443	0.423189	0.719575	-0.0457867	0	0.457057
Atg4b	0.106779	5.32776	1.21976	0.269409	-0.00310143	5.32776	0.00102712	0.974433	-0.0382322	-0.0659036	0.30025	0.976503
Atg4c	0.0572943	4.10436	0.151194	0.697397	-0.00473631	4.10436	0.00106835	0.973925	-0.0131504	-0.00611881	0.717049	0.976081
Atg7	0.0481081	5.2256	0.205782	0.650094	0.107187	5.2256	1.02175	0.312105	-0.012669	0.0385352	0.672181	0.347039
Atg9a	-0.06797	5.59174	0.78557	0.375443	0.00492297	5.59174	0.0041121	0.94887	0.0252575	-0.0171673	0.407549	0.953089
Atic	-0.455894	6.61814	45.9518	1.21198e-11	-0.012289	6.61814	0.0334163	0.854954	0.157297	0.0171325	0	0.865909
Atl3	1.99127	2.96601	156.338	7.14327e-36	-0.0713492	2.96601	0.190081	0.662849	-0.601523	-0.0195589	0	0.685736
Atm	-0.046259	2.95596	0.0453434	0.831374	-0.46592	2.95596	4.80816	0.0283253	0.00789226	-0.114865	0.842667	0.0384967
Atmin	-0.467907	4.33351	16.3839	5.17237e-05	-0.225571	4.33351	3.8057	0.0510784	0.162565	0.0425316	8.50462e-05	0.0665806
Atp11a	0.971232	7.93393	335.729	5.43325e-75	-0.0214036	7.93393	0.164771	0.684801	-0.32353	0.0116245	0	0.706285
Atp11b	-8.41925	2.9551	433.776	2.44993e-96	-0.299649	2.9551	8.91629e-09	0.999925	1	0	0	0.9997
Atp13a3	-0.165014	7.88102	9.80296	0.00174231	0.015903	7.88102	0.0910742	0.762816	0.0575549	0.0122545	0.00273743	0.779249
Atp1a1	-0.211896	8.19688	20.8459	4.97769e-06	-0.0248019	8.19688	0.285776	0.59294	0.0730062	-0.0142555	7.97308e-06	0.620266
Atp1b3	-0.125202	6.31959	3.4302	0.0640143	-0.101745	6.31959	2.26549	0.132284	0.0442502	-0.00957713	0.0814105	0.158999
Atp2b1	-0.875908	3.17799	28.2667	1.05697e-07	-0.168039	3.17799	1.038	0.308288	0.281453	-0.0587861	0	0.343172
Atp2b4	-0.0316865	2.41217	0.0226702	0.880318	0.324279	2.41217	2.40883	0.120652	0.00722427	-0.0236634	0.888746	0.146232
Atp5b	0.135062	11.6834	12.7247	0.000360861	-0.0169478	11.6834	0.200429	0.654374	-0.0464259	-0.0067087	0.000608612	0.677571
Atp5e	0.452236	8.5018	108.413	2.18194e-25	0.0193055	8.5018	0.19799	0.656348	-0.155272	-0.00407523	0	0.679474
Atp5g1	-0.95025	8.446	448.811	1.30855e-99	0.00328531	8.446	0.00540306	0.941404	0.318097	-0.0185146	0	0.945972
Atp5g3	-0.0920924	2.53125	0.235944	0.627151	-0.133429	2.53125	0.494249	0.482038	0.0299713	0.0768692	0.650364	0.513852
Atp5j	1.91776	8.66423	1050.97	1.49715e-230	0.05463	8.66423	0.895976	0.343863	-0.579341	0.0193201	0	0.378705
Atp5s	-0.0369476	3.12051	0.0249687	0.874445	0.0462542	3.12051	0.0389733	0.843502	0.0145603	0.0892785	0.883319	0.854994
Atp5sl	0.798291	5.82166	88.9065	4.13915e-21	0.0374614	5.82166	0.196578	0.657497	-0.26751	0.0495734	0	0.68054
Atp6v0a1	0.300033	4.70816	8.13822	0.00433419	0.0620147	4.70816	0.34753	0.555515	-0.104588	0.00765827	0.00651667	0.584153
Atp6v0b	-0.0240594	7.43251	0.252566	0.615274	0.0485753	7.43251	1.02954	0.310267	0.00848291	0.0193672	0.639197	0.345195
Atp6v0e	-0.475039	6.91157	35.6809	2.32431e-09	0.0106034	6.91157	0.0178454	0.893729	0.163115	0.0287608	0	0.902024
Atp6v1b2	-0.0594038	6.12209	0.468336	0.493753	0.00170195	6.12209	0.000385219	0.984341	0.0225554	-0.0115169	0.523749	0.985566
Atp6v1g1	-0.00284071	6.32654	0.00161726	0.967922	0.0416107	6.32654	0.347838	0.55534	0.00286813	0.0598843	0.970221	0.583999
Atp6v1g2	0.566361	5.45693	24.3632	7.97792e-07	-0.017624	5.45693	0.023625	0.877843	-0.187358	0.0416725	0	0.887032
Atp6v1h	0.010196	5.36363	0.015365	0.90135	-0.0109756	5.36363	0.0178181	0.89381	-0.00318693	0.00194583	0.90857	0.902109
Atp8a1	-0.115447	4.32902	1.40143	0.236484	0.0973531	4.32902	0.99584	0.318319	0.0435169	-0.0104661	0.266686	0.353542
Atp8b1	0.0791766	7.33638	2.22449	0.135837	-0.0379951	7.33638	0.512391	0.474105	-0.0264997	0.00983508	0.1615	0.506129
Atp8b2	-0.228272	2.69155	1.24702	0.264122	0.0397772	2.69155	0.0388416	0.843763	0.0822658	-0.0445791	0.294903	0.855241
Atp8b5	-0.172171	5.51573	3.93473	0.0472987	-0.0156346	5.51573	0.032423	0.857102	0.0596334	-0.00758369	0.0617196	0.867915
Atp9b	0.038924	4.83539	0.0838332	0.772168	0.0066418	4.83539	0.0024253	0.960722	-0.012872	0.0485763	0.78756	0.963959
Atpaf1	-0.0584201	4.29363	0.263909	0.607447	0.134796	4.29363	1.40366	0.236113	0.0271847	0.0792869	0.631516	0.269365
Atpaf2	-0.181788	3.06748	1.08208	0.298234	0.107318	3.06748	0.377454	0.538969	0.0777532	0.0481869	0.329275	0.568367
Atpif1	0.0334092	5.78329	0.214391	0.643347	0.106103	5.78329	2.1622	0.141442	-0.00909951	0.0458845	0.665686	0.168915
Atr	-0.202344	5.16363	4.53665	0.0331765	0.0794164	5.16363	0.699047	0.403104	0.0688594	0.00148873	0.0444287	0.437462
Atrnl1	-1.51404	7.53147	680.892	4.2758e-150	0.0025758	7.53147	0.00200017	0.964328	0.480843	-0.00730463	0	0.967215
Atxn2	-0.190704	3.2463	1.68234	0.194613	-0.184941	3.2463	1.58177	0.208506	0.069289	-0.0184401	0.223579	0.240893
Atxn3	-0.17919	2.90396	1.11253	0.291532	-0.10167	2.90396	0.357775	0.549745	0.0636962	0.0587026	0.322583	0.578742
Atxn7	0.289472	3.24236	3.04814	0.0808298	0.242103	3.24236	2.13016	0.144426	-0.108227	-0.00967482	0.100456	0.172264
Atxn7l3	0.0398568	5.41105	0.226502	0.63413	-0.0798027	5.41105	0.908262	0.340576	-0.0123058	-0.0454609	0.657179	0.375479
AU021092	0.0315273	3.44102	0.0296496	0.863288	-0.236284	3.44102	1.64756	0.199291	-0.00959841	-0.0498545	0.872763	0.231129
AU022252	0.27113	5.23594	6.70443	0.00961736	0.0319091	5.23594	0.0929616	0.760445	-0.0919302	-0.00168296	0.0139183	0.77711
Auh	-0.0940137	6.15955	1.73045	0.188354	-0.0742243	6.15955	1.07872	0.298983	0.0342339	0.00429093	0.217317	0.333687
Aurkaip1	-0.0125753	7.08905	0.0415558	0.838469	-0.017485	7.08905	0.0803227	0.776861	0.00573189	0.00757662	0.849327	0.792423
AV039307	0.316335	2.83649	2.69697	0.100539	-0.486194	2.83649	6.35681	0.0116932	-0.0993588	-0.0821192	0.122637	0.0170704
Aven	0.17089	4.79738	2.4542	0.117211	0.0401706	4.79738	0.135769	0.712524	-0.0586363	0.018496	0.141145	0.732413
AW495222	0.335343	3.75613	7.98289	0.00472216	-0.0280136	3.75613	0.0554838	0.813782	-0.113947	0.031898	0.00707212	0.827093
Axin1	0.323342	4.80695	7.88651	0.00498048	0.179757	4.80695	2.43848	0.118391	-0.108191	0.0251397	0.00747875	0.143747
Axin2	0.147614	3.32633	0.573432	0.448898	-0.0163224	3.32633	0.00695326	0.933544	-0.0528452	-0.0973693	0.479706	0.938546
AY036118	3.32075	10.0028	301.818	1.32357e-67	0.0485198	10.0028	0.0751483	0.783983	-0.803373	-0.030903	0	0.799325
Azgp1	-0.0278937	11.5896	0.509863	0.475198	-0.00774858	11.5896	0.0393455	0.842766	0.0100122	0.000244853	0.505674	0.854324
Azin1	-0.0594859	4.44807	0.353806	0.551967	0.160868	4.44807	2.58678	0.107759	0.0170448	-0.00568146	0.579619	0.131803
B230118H07Rik	-0.127111	6.23729	1.45915	0.227066	-0.20984	6.23729	3.97532	0.0461716	0.0442677	0.0388198	0.257188	0.0605662
B230120H23Rik	0.0056314	5.39202	0.00300743	0.956266	0.0995999	5.39202	0.944194	0.331201	-0.000521388	0.018376	0.95939	0.366214
B230206L02Rik	-1.52274	4.14466	84.0107	4.92111e-20	0.169606	4.14466	1.04675	0.306257	0.470243	-0.00115834	0	0.341115
B2m	0.323549	13.0351	69.4381	7.8851e-17	-0.000911321	13.0351	0.000552118	0.981254	-0.1113	0.00452673	0	0.982635
B3galt6	0.171604	4.17462	1.72789	0.188681	-0.138651	4.17462	1.12843	0.28811	-0.0568739	-0.0149535	0.217647	0.322519
B3galtl	-0.382312	3.9742	6.2032	0.0127519	-0.0245565	3.9742	0.0255295	0.873055	0.134296	0.102047	0.0183753	0.882572
B3gnt1	0.144043	4.76813	2.53554	0.111309	0.0145335	4.76813	0.0258038	0.87238	-0.0501006	-0.005095	0.13458	0.882022
B3gnt2	0.0279566	4.14665	0.0403371	0.840823	-0.0788305	4.14665	0.320094	0.571551	-0.00931485	-0.029745	0.851685	0.59956
B430306N03Rik	-0.184059	3.53376	1.47249	0.224954	-0.100281	3.53376	0.435742	0.509185	0.0667296	-0.0134386	0.25499	0.539849
B4galnt1	-0.177641	5.71746	4.27069	0.0387752	-0.0997174	5.71746	1.34592	0.245992	0.0613509	0.0251066	0.0513493	0.279366
B4galt1	0.176586	3.4798	1.35777	0.243924	0.00559232	3.4798	0.00133817	0.970819	-0.0593715	0.0457092	0.274295	0.973303
B4galt2	0.39215	2.25072	3.43179	0.0639528	-0.289487	2.25072	1.86734	0.17178	-0.137674	-0.0957951	0.0813467	0.201913
B4galt3	-0.146404	2.02866	0.328757	0.566392	-0.0980848	2.02866	0.145922	0.702463	0.0713491	0.159952	0.59329	0.722909
B4galt6	0.025541	2.34483	0.0114713	0.914706	-0.0943362	2.34483	0.152843	0.695833	-0.0346191	-0.153325	0.920904	0.716674
B630019A10Rik	2.51834	3.03479	115.995	4.76476e-27	-0.224068	3.03479	0.90261	0.342083	-0.692463	-0.0682076	0	0.376933
B930036N10Rik	-0.0696097	2.33617	0.0878633	0.766911	0.348786	2.33617	2.17488	0.14028	0.0269577	0.069641	0.782635	0.167576
B930095G15Rik	0.145102	2.92867	0.820911	0.364914	-0.0751885	2.92867	0.220704	0.638504	-0.0561009	0.0536078	0.397203	0.662818
Bach2	0.0895707	4.42583	0.830764	0.362052	0.177495	4.42583	3.2648	0.0707817	-0.0242731	0.00712797	0.394333	0.0895404
Bag3	0.0594489	3.78537	0.206097	0.649844	0.0643174	3.78537	0.241572	0.623073	-0.0232876	-0.0250748	0.671945	0.648608
Bag5	0.232919	4.82899	5.52444	0.0187526	-0.149169	4.82899	2.26515	0.132313	-0.080404	-0.00673464	0.0265743	0.159026
Bag6	0.396985	7.74968	9.41611	0.00215087	-0.0656301	7.74968	0.2582	0.611359	-0.131969	0.0477548	0.00334338	0.637812
Bahd1	-0.257025	4.49854	5.13594	0.0234354	0.06316	4.49854	0.31012	0.577607	0.0881312	0.0210471	0.0326498	0.60554
Bak1	0.446806	3.53719	8.76965	0.00306284	0.10941	3.53719	0.524631	0.468873	-0.150332	-0.0133588	0.00470412	0.501169
Banp	0.301434	3.66784	2.73587	0.0981183	-0.106363	3.66784	0.34219	0.558568	-0.10471	-0.0455609	0.119881	0.587039
Baz1a	-0.0338085	3.66095	0.0413079	0.838945	-0.127612	3.66095	0.58654	0.44376	0.0131262	0.0130749	0.849808	0.477149
Baz2a	0.146506	6.37502	3.94119	0.0471173	-0.0197818	6.37502	0.0718975	0.788594	-0.0498913	0.00425224	0.061507	0.803596
Bbc3	0.331933	2.47936	3.11184	0.0777251	0.138058	2.47936	0.536939	0.463704	-0.116882	-0.0538711	0.0969208	0.496178
Bbox1	-0.050482	7.98699	1.15299	0.282925	-0.0728654	7.98699	2.40206	0.121175	0.0183833	-0.0117655	0.313701	0.1468
Bbs10	-0.364802	4.4327	13.4303	0.000247596	-0.179572	4.4327	3.25219	0.0713282	0.126077	-0.0134506	0.00044915	0.0901384
Bbs7	-0.036356	2.77489	0.0234023	0.878415	0.167542	2.77489	0.495618	0.481432	0.0125221	-0.0981885	0.886958	0.51327
Bbx	-0.202031	3.91493	2.01168	0.156093	-0.0930674	3.91493	0.426826	0.51355	0.0718168	-0.0254298	0.183099	0.54416
BC003331	0.464189	7.39777	99.5995	1.86553e-23	0.000537725	7.39777	0.000131893	0.990837	-0.15908	0.00632172	0	0.991586
BC003965	-0.0178047	5.18075	0.0635316	0.800999	-0.0272149	5.18075	0.148503	0.69997	0.0070825	-0.00823756	0.814238	0.720501
BC004004	0.199501	6.66441	10.7365	0.00105044	-0.0212665	6.66441	0.122043	0.726829	-0.0682221	0.00713451	0.0017089	0.745903
BC005537	0.063145	6.03349	0.701887	0.40215	-0.0469971	6.03349	0.388705	0.532981	-0.0230298	-0.0370446	0.433924	0.562735
BC016423	-0.0538605	6.11575	0.682658	0.408673	0.0161649	6.11575	0.061476	0.804178	0.0198939	-0.00432374	0.44021	0.818222
BC018507	0.312162	5.63244	18.4334	1.75943e-05	0.0438549	5.63244	0.363767	0.546422	-0.106393	-0.0044666	3.455e-05	0.575574
BC023719	-0.564071	5.62296	1.09892	0.294502	-0.310102	5.62296	0.338601	0.560638	0.15324	0.0390123	0.325583	0.589001
BC026585	0.860373	6.36782	158.47	2.44367e-36	0.0768945	6.36782	1.26927	0.259903	-0.287648	0.0100371	0	0.293481
BC029722	0.174411	5.07541	4.86287	0.0274407	0.0262011	5.07541	0.109588	0.740613	-0.0596666	0.0329772	0.0375054	0.758578
BC039771	0.137548	3.21725	0.539447	0.462662	-0.166875	3.21725	0.793795	0.372955	-0.0422421	0.0284774	0.493364	0.407842
BC046401	-0.364786	3.58938	5.3246	0.0210264	-0.127306	3.58938	0.647996	0.42083	0.126004	-0.033797	0.0295137	0.454774
BC048403	0.660988	3.32557	19.751	8.82153e-06	0.0551243	3.32557	0.136412	0.711875	-0.218558	0.0303216	7.97308e-06	0.731839
BC048644	-1.28794	6.20441	422.176	8.19823e-94	-0.0220335	6.20441	0.123536	0.72523	0.420384	-0.0068181	0	0.74437
BC051226	-0.0312279	3.04473	0.0182839	0.89244	-0.0963278	3.04473	0.172136	0.678221	0.019694	0.151755	0.900071	0.700252
BC053749	-0.193205	3.1614	0.989206	0.319936	-0.164467	3.1614	0.715971	0.397469	0.0677468	-0.0106585	0.351693	0.431859
BC056474	0.5122	3.23912	9.21433	0.00240128	0.0379054	3.23912	0.0504494	0.822283	-0.172179	-0.0812441	0.00370748	0.835098
BC064078	0.471095	3.06791	1.52441	0.216953	0.994826	3.06791	6.68097	0.00974474	-0.163165	-0.10071	0.246815	0.0144977
BC068281	-0.84958	2.58278	8.06133	0.004522	0.767938	2.58278	6.59168	0.0102456	0.222523	0.131244	0.00675586	0.015194
BC089597	-2.05546	8.23509	41.2577	1.33425e-10	-0.322446	8.23509	1.05615	0.304094	0.558658	-0.000166857	0	0.338954
BC096441	-1.19946	5.01315	87.5686	8.14083e-21	-0.0978192	5.01315	0.585888	0.444014	0.388861	-0.0182584	0	0.477386
Bcar1	0.0214288	6.29157	0.116811	0.73252	0.014053	6.29157	0.050264	0.822604	-0.00668988	0.00828207	0.750235	0.835361
Bcar3	0.0351127	6.92217	0.315009	0.574622	0.0129902	6.92217	0.0431092	0.83552	-0.0117812	0.00155579	0.600958	0.847225
Bcas3	0.0761547	4.3704	0.197919	0.656406	-0.344964	4.3704	4.05108	0.0441432	-0.0277641	-0.0960234	0.678113	0.0579989
Bcdin3d	-0.0578997	3.15782	0.140592	0.707693	0.180188	3.15782	1.36257	0.243092	0.0283466	0.0287025	0.726895	0.276435
Bche	-0.320251	5.92903	19.8231	8.4951e-06	0.0808195	5.92903	1.26247	0.261184	0.115057	0.0218417	7.97308e-06	0.294791
Bckdha	2.16933	2.52894	80.9898	2.26881e-19	0.168542	2.52894	0.482359	0.487356	-0.620287	0.0488628	0	0.518949
Bckdhb	-0.474147	7.39623	93.7882	3.51167e-22	0.0197961	7.39623	0.163766	0.685712	0.162864	0.00850309	0	0.707119
Bcl2l12	-0.473835	2.24385	4.4887	0.0341196	0.145677	2.24385	0.423418	0.515236	0.159902	-0.117505	0.0455024	0.545874
Bcl2l13	-0.0856618	5.78577	1.11315	0.291398	-0.0602597	5.78577	0.551039	0.457893	0.0281691	-0.0239738	0.322458	0.490573
Bcl2l2	0.104594	3.4129	0.757825	0.38401	-0.100607	3.4129	0.701147	0.402398	-0.0388655	0.00945013	0.416083	0.43671
Bcl6b	-0.337467	3.1763	2.53951	0.111029	0.326473	3.1763	2.37366	0.123398	0.120978	0.176409	0.134214	0.149144
Bcl7a	1.1223	2.62556	22.3436	2.27977e-06	0.242195	2.62556	1.0416	0.30745	-0.355042	-0.0249315	2.65769e-06	0.342319
Bcl9l	0.000221032	3.35452	5.2393e-06	0.998174	-0.117996	3.35452	0.180328	0.671091	-0.00595203	0.0449216	0.99835	0.693682
Bclaf1	-0.80316	4.126	49.076	2.46233e-12	0.0121717	4.126	0.0111734	0.915817	0.270716	-0.00119099	0	0.922244
Bcmo1	-0.117681	4.51166	1.10502	0.293167	-0.0912405	4.51166	0.664248	0.415064	0.0388019	-0.00951159	0.324231	0.449177
Bcs1l	-0.176733	3.46205	0.99899	0.317555	0.137395	3.46205	0.605229	0.43659	0.0694499	0.131359	0.34933	0.470255
Bdh1	0.0994219	9.62384	5.19787	0.0226146	0.00409146	9.62384	0.0088049	0.925241	-0.0339198	0.0201693	0.0316	0.931004
Becn1	0.0194828	7.09487	0.135764	0.712529	0.0416573	7.09487	0.62072	0.43078	-0.00676479	-0.022958	0.731472	0.464408
Bend4	0.454835	2.5301	6.48671	0.0108684	0.230012	2.5301	1.64929	0.199056	-0.152034	0.0736066	0.0157894	0.230858
Bend7	-0.599728	4.1913	29.6889	5.0724e-08	0.000225701	4.1913	9.14102e-07	0.999237	0.206512	0.0221685	0	0.999221
Bet1	0.0961306	3.7541	0.373528	0.541087	-0.292049	3.7541	3.44651	0.0633854	-0.0326058	-0.0529921	0.568845	0.0810411
Bhlhe40	-0.190171	4.99643	5.19061	0.0227092	-0.032098	4.99643	0.147686	0.700756	0.0694676	0.0270098	0.0317196	0.721261
Bhlhe41	1.19454	3.12887	39.7394	2.90218e-10	-0.567302	3.12887	8.90458	0.00284456	-0.384664	0.0597146	0	0.00443835
Bhmt	0.625734	12.7508	295.713	2.82958e-66	0.00360711	12.7508	0.00989879	0.920747	-0.212863	-0.0203856	0	0.926887
Bhmt-ps1	-0.796607	5.34436	98.8105	2.77859e-23	-0.0769359	5.34436	0.918162	0.337958	0.26968	-0.0241151	0	0.372949
Bhmt2	-0.179647	7.91184	15.6671	7.55277e-05	-0.0464986	7.91184	1.04989	0.305533	0.0622478	-0.00993854	0.000135542	0.340403
Bicc1	-0.187626	3.05829	0.801244	0.370722	0.187853	3.05829	0.805412	0.36948	0.0540925	0.0471097	0.402922	0.404342
Bid	1.08444	5.72202	107.892	2.83826e-25	-0.0216885	5.72202	0.0436779	0.834454	-0.355184	0.0224536	0	0.846266
Bik	0.51563	3.7829	14.0257	0.000180332	0.00483382	3.7829	0.00128189	0.971439	-0.175676	-0.0326538	0.000358789	0.973854
Bin2	0.281965	2.6133	1.02971	0.310226	0.4937	2.6133	3.1361	0.0765767	-0.0684807	0.0725291	0.341657	0.0962032
Birc6	-0.0790764	4.71121	0.451896	0.501436	0.0341122	4.71121	0.0841325	0.771773	0.0230668	-0.0034214	0.531132	0.787462
Blcap	0.793258	3.13771	22.1142	2.56899e-06	0.0608902	3.13771	0.129014	0.719457	-0.267877	-0.00713202	2.65769e-06	0.739012
Blmh	0.0567947	6.2033	0.662206	0.415782	0.0647142	6.2033	0.859826	0.353787	-0.0191441	0.0227289	0.44737	0.388419
Blnk	0.025355	2.92008	0.0101047	0.91993	-0.275742	2.92008	1.21695	0.26996	0.00260512	-0.0558331	0.925864	0.303875
Bloc1s1	-0.670495	4.78045	44.6131	2.4008e-11	0.0531426	4.78045	0.280355	0.596469	0.2281	0.00309579	0	0.623495
Bloc1s5	-0.112213	5.79773	2.62025	0.105508	-0.0544496	5.79773	0.61691	0.432198	0.0407232	-0.00956336	0.128074	0.465867
Bloc1s6	-0.548045	6.68935	52.1074	5.25458e-13	-0.0766528	6.68935	1.02245	0.311939	0.186056	0.0116194	0	0.346864
Blvra	-0.045787	4.3426	0.142459	0.705848	0.0214143	4.3426	0.0312126	0.859767	0.0296364	0.0159179	0.725133	0.870398
Blzf1	-0.277192	4.29701	6.15522	0.0131025	-0.128232	4.29701	1.31709	0.251115	0.0992965	0.0425909	0.0188989	0.284434
Bmf	-0.143528	5.37427	1.62481	0.202423	0.112111	5.37427	0.992157	0.319216	0.0494909	-0.0167993	0.231687	0.354385
Bmp5	0.189297	4.42207	3.33164	0.0679589	-0.0576256	4.42207	0.308468	0.578622	-0.0641073	-0.0221643	0.0857478	0.606462
Bmp8b	0.127325	2.41477	0.188767	0.663945	-0.0650255	2.41477	0.0488948	0.824998	-0.0495664	0.0001671	0.685167	0.837479
Bmpr2	0.121115	4.89172	1.57632	0.209292	0.081902	4.89172	0.720631	0.395937	-0.0406173	0.0282938	0.239049	0.430289
Bnip1	0.388873	5.4209	22.0362	2.67553e-06	-0.104294	5.4209	1.58488	0.208059	-0.133053	-0.029718	2.65769e-06	0.24042
Bnip2	0.431184	4.84398	19.3405	1.09363e-05	-0.0117316	4.84398	0.0143149	0.904764	-0.14953	-0.0580992	1.32885e-05	0.91206
Bnip3	-0.0615118	7.5528	1.32702	0.249336	0.101947	7.5528	3.64527	0.0562288	0.0220892	0.00602606	0.279709	0.0725949
Bod1	0.223128	5.3934	6.20875	0.012712	-0.024935	5.3934	0.0775601	0.780631	-0.0760242	0.00262122	0.0183301	0.795985
Bok	-0.0989827	3.54614	0.544268	0.460669	0.127384	3.54614	0.89874	0.34312	0.0432325	0.0508248	0.491293	0.377959
Bola3	-0.34781	4.75731	13.3946	0.00025235	0.0266445	4.75731	0.0785106	0.779326	0.120622	-0.0262061	0.000457123	0.794749
Bop1	0.0623273	3.83586	0.16967	0.680406	-0.347915	3.83586	5.30634	0.021248	-0.0130904	-0.0145511	0.701025	0.0295296
Bpnt1	0.704469	8.39233	200.896	1.33127e-45	-0.0160355	8.39233	0.104802	0.746141	-0.238701	-0.0113991	0	0.763845
Bptf	-0.0446324	3.4766	0.041696	0.8382	-0.16034	3.4766	0.540196	0.462352	0.015036	-0.134412	0.849064	0.494879
Brap	-0.239146	6.17758	11.5291	0.000685145	-0.00613011	6.17758	0.007565	0.93069	0.0817706	-0.0413448	0.00113218	0.935915
Brd2	-0.284042	6.55221	20.1641	7.10751e-06	0.0278347	6.55221	0.193722	0.659836	0.09799	-0.0161539	7.97308e-06	0.682772
Brd4	-0.0380624	4.84582	0.143923	0.704412	0.148531	4.84582	2.1895	0.138954	0.0156656	0.0208809	0.723844	0.166143
Brd8	0.0879557	4.53873	0.59148	0.441847	0.0175024	4.53873	0.0233762	0.878483	-0.0323136	-0.0238	0.472809	0.887561
Brd9	0.0680519	5.38391	0.453207	0.500816	0.0024629	5.38391	0.000585886	0.980689	-0.0218331	0.00921369	0.530548	0.982127
Bre	-0.114975	4.29266	1.08512	0.297554	-0.167541	4.29266	2.30382	0.129057	0.0442585	-0.00643905	0.32868	0.155472
Brf1	0.443309	4.53786	15.0953	0.000102216	-0.0715353	4.53786	0.392878	0.530791	-0.149552	-0.0544425	0.000191354	0.560673
Bri3bp	0.147367	5.29456	3.38185	0.0659182	0.0410375	5.29456	0.262102	0.60868	-0.0537743	-0.0355889	0.0834994	0.635218
Brpf3	0.568762	4.25558	21.9882	2.74337e-06	-0.01019	4.25558	0.00703199	0.93317	-0.198234	0.0291581	2.65769e-06	0.938185
Bsdc1	-0.115662	7.60953	4.82213	0.0280966	0.0491439	7.60953	0.870711	0.350759	0.0401086	0.0230998	0.0382947	0.385602
Btaf1	-6.74682	4.14542	252.195	8.62779e-57	-0.627454	4.14542	2.04323	0.152885	0.975995	-0.00302842	0	0.181241
Btbd1	-8.90484	3.37179	544.388	2.09316e-120	-0.0510214	3.37179	-6.27634e-10	1	1	0	0	1
Btbd10	-0.0734589	3.65759	0.226726	0.633962	-0.218733	3.65759	2.01447	0.155806	0.0292991	5.37581e-05	0.657019	0.184447
Btbd19	-0.415893	3.64453	8.48583	0.00357923	-0.0979578	3.64453	0.468773	0.493552	0.143349	-0.0873452	0.00544296	0.5249
Btbd6	0.271311	2.69805	1.88764	0.169469	0.00349173	2.69805	0.00036664	0.984723	-0.0977582	-0.0426748	0.19736	0.985922
Btbd7	9.22944	5.35793	1795.74	0	1.70322	5.35793	12.8469	0.000338044	-0.994886	0.00243591	0	0.000547485
Btc	-0.301355	4.14562	3.59396	0.05799	-0.104535	4.14562	0.429235	0.512364	0.113037	0.0660401	0.0743331	0.54302
Btg2	0.300374	4.92452	9.6315	0.00191268	-0.0612662	4.92452	0.40128	0.526429	-0.105601	-0.0195263	0.00301648	0.556667
Btnl9	6.51394	3.18427	433.746	2.48664e-96	-0.987601	3.18427	5.12548	0.0235771	-0.977151	-0.00390991	0	0.0325355
Bub1b	-1.20694	2.54955	29.797	4.79732e-08	-0.24149	2.54955	1.15187	0.283158	0.408664	-0.0758251	0	0.317347
BX537302.1	0.115617	2.97742	0.428023	0.512961	-0.171173	2.97742	0.939655	0.332366	-0.021568	0.0271902	0.541806	0.36744
Bzw1	0.402934	6.04144	34.0851	5.2754e-09	-0.0886508	6.04144	1.65065	0.19887	-0.136848	-0.00920934	0	0.230672
Bzw2	-0.0463838	4.88418	0.214209	0.643488	-0.120503	4.88418	1.44573	0.229215	0.0163222	-0.0121713	0.665819	0.262208
C030006K11Rik	0.298131	5.02619	13.5018	0.000238331	0.0507174	5.02619	0.390158	0.532216	-0.10483	-0.0256303	0.000425231	0.562009
C030034I22Rik	2.90644	3.21912	184.167	5.96678e-42	0.0686559	3.21912	0.0992098	0.75278	-0.766819	0.0262194	0	0.77007
C130050O18Rik	-0.0253072	2.66628	0.0114388	0.914827	-0.508554	2.66628	4.1105	0.0426178	-0.0211818	-0.152066	0.921011	0.0561837
C130074G19Rik	-0.156979	9.63016	11.0478	0.000887907	-0.0568244	9.63016	1.44817	0.228822	0.0545429	-0.00733826	0.00142718	0.261844
C1galt1	0.196351	4.9307	3.97182	0.0462679	0.041909	4.9307	0.180835	0.670656	-0.0639899	0.0420571	0.0604732	0.693257
C1qbp	-0.254461	4.92184	7.89296	0.00496275	-0.0485619	4.92184	0.286736	0.59232	0.0902005	0.0165795	0.00746546	0.619676
C1qtnf5	-0.0242175	2.15666	0.0104507	0.918575	0.012725	2.15666	0.00293861	0.956769	0.00973256	-0.138687	0.924585	0.960257
C1ra	-0.241402	9.10947	29.3969	5.89719e-08	0.00998273	9.10947	0.0503081	0.822528	0.0838209	0.0120148	0	0.8353
C1s	0.441787	10.5174	122.179	2.10935e-28	-0.00288495	10.5174	0.00522917	0.942353	-0.151513	0.0126839	0	0.94691
C2	0.0681092	8.91947	2.73388	0.0982402	0.0180073	8.91947	0.191118	0.661988	-0.0230072	0.00221242	0.120045	0.684824
C230037L18Rik	-0.0584067	2.9566	0.117065	0.73224	-0.0886824	2.9566	0.271894	0.602064	0.00734636	-0.0160088	0.749953	0.628773
C230081A13Rik	5.286e-05	2.22134	3.86587e-08	0.999843	0.090994	2.22134	0.238096	0.625585	0.0205931	0.0763358	0.999721	0.651058
C2cd2l	0.181301	5.20384	3.5115	0.0609441	-0.118969	5.20384	1.51174	0.218874	-0.0637796	-0.0669801	0.0779156	0.251474
C2cd5	-0.137909	3.94676	1.05702	0.303896	0.187425	3.94676	1.95454	0.162098	0.0476555	0.0219711	0.335196	0.191375
C330018D20Rik	0.379786	3.57902	9.39029	0.00218138	-0.148551	3.57902	1.43522	0.230915	-0.119127	0.0459203	0.00337793	0.263936
C4a	0.903997	10.6699	5.18468	0.0227868	-0.508161	10.6699	1.63297	0.201292	-0.238727	-0.0120659	0.0318498	0.233292
C4b	0.198727	12.652	24.951	5.88061e-07	-0.0121058	12.652	0.0926592	0.760823	-0.0684025	-0.00591246	0	0.777514
C530005A16Rik	0.465129	4.74643	21.807	3.01498e-06	-0.159713	4.74643	2.57133	0.108816	-0.158765	-0.071466	2.65769e-06	0.133002
C77080	-0.278591	7.52714	23.7907	1.07402e-06	0.0783559	7.52714	1.88335	0.169954	0.0967937	0.0267569	2.65769e-06	0.199891
C8a	0.853066	11.2368	289.146	7.63337e-65	-0.0308485	11.2368	0.382978	0.536014	-0.286771	0.0112231	0	0.565608
C8b	-0.91956	9.21261	241.708	1.66823e-54	0.0225643	9.21261	0.147367	0.701064	0.308678	-0.013473	0	0.721575
C920025E04Rik	-0.102493	7.32799	0.0775329	0.780669	-0.292366	7.32799	0.628546	0.427889	0.034394	0.0157443	0.795464	0.46157
CAAA01201205.1	1.4665	2.01664	28.3952	9.89092e-08	-0.0734446	2.01664	0.0739063	0.785732	-0.463405	0.0165382	0	0.800971
Caap1	-0.248062	2.53462	2.07914	0.149325	-0.0900441	2.53462	0.273831	0.600774	0.0882043	0.0663915	0.175969	0.627482
Cab39	-0.0834587	5.82572	0.713375	0.398326	-0.0186381	5.82572	0.0355653	0.850416	0.0292551	0.0591672	0.430084	0.861635
Cab39l	0.343077	6.71279	35.1291	3.08555e-09	-0.0185893	6.71279	0.103152	0.74808	-0.116668	0.0166141	0	0.765679
Cables1	0.228377	2.52963	0.681137	0.409195	-0.0125971	2.52963	0.00132471	0.970966	-0.074777	0.0738038	0.440741	0.973458
Cacfd1	1.09661	6.90034	193.756	4.81495e-44	-0.00460593	6.90034	0.00347742	0.952976	-0.359507	0.0077756	0	0.956733
Cacna1a	-3.32328	2.24042	82.0028	1.35896e-19	-0.0359123	2.24042	0.00557888	0.94046	0.808232	-0.036598	0	0.945087
Cacul1	3.7528	4.2071	550.35	1.05623e-121	-0.109234	4.2071	0.401877	0.526121	-0.861908	-0.0163059	0	0.556356
Cacybp	0.0276263	2.88517	0.0224793	0.880819	-0.0893239	2.88517	0.235779	0.627272	-0.00117938	0.0448801	0.889225	0.652581
Cadm1	-0.222061	5.31977	5.77294	0.0162748	-0.150778	5.31977	2.66232	0.102751	0.0799883	0.00188492	0.0232947	0.126166
Cadps2	-0.309804	5.11255	12.0908	0.000506716	0.244083	5.11255	7.50356	0.00615772	0.108941	0.030918	0.000858435	0.00926738
Calcrl	1.09367	3.33929	16.8626	4.01866e-05	0.203033	3.33929	0.580512	0.446112	-0.34993	-0.124976	7.17577e-05	0.479387
Cald1	0.0331309	6.40406	0.204869	0.650819	-0.0927672	6.40406	1.60574	0.205091	-0.0106325	-0.0209284	0.672859	0.237356
Calm1	0.23663	4.73667	6.90203	0.00860979	-0.0797543	4.73667	0.783945	0.375937	-0.0856795	-0.0453349	0.0125736	0.410675
Calr	0.0178182	10.1435	0.177359	0.673652	-0.0269529	10.1435	0.405797	0.52411	-0.005876	-0.0178123	0.69458	0.55443
Camk1	-0.0216844	4.14913	0.0149006	0.902845	-0.165057	4.14913	0.849446	0.356709	0.0163494	0.0393547	0.909872	0.391279
Camk2b	5.12532	2.36908	115.331	6.66e-27	0.455657	2.36908	0.758523	0.383791	-0.936501	0.0269911	0	0.418297
Camk2d	-0.171465	5.3061	4.08836	0.0431796	-0.100089	5.3061	1.39309	0.237883	0.0586464	0.00555162	0.0567391	0.271186
Camk2g	-0.230767	2.58125	1.31144	0.252134	-0.0582956	2.58125	0.0834589	0.772664	0.0830343	0.0098255	0.282571	0.788291
Camk2n1	-1.28522	4.77437	162.025	4.0854e-37	-0.016437	4.77437	0.0264265	0.870863	0.420898	0.0161514	0	0.8806
Camsap2	0.21874	5.25955	1.23791	0.265874	-0.159916	5.25955	0.662542	0.415664	-0.0682659	-0.0755705	0.296625	0.449735
Camta2	-0.312447	5.30262	10.8031	0.00101331	-0.00222622	5.30262	0.000545832	0.981361	0.108737	-0.0265436	0.00162917	0.98272
Cant1	-0.215209	3.89003	1.94419	0.163214	0.0339161	3.89003	0.0486511	0.825427	0.0809019	0.0119675	0.190674	0.837881
Canx	0.0971618	8.94317	4.10586	0.0427348	0.00937218	8.94317	0.0382109	0.84502	-0.0332675	0.00259656	0.0561651	0.856445
Capn2	0.361899	6.80467	42.5229	6.98589e-11	0.00252114	6.80467	0.00206272	0.963775	-0.124032	-0.00199185	0	0.966736
Capn3	0.506422	4.13785	17.5547	2.79154e-05	-0.00361078	4.13785	0.000835673	0.976938	-0.176588	0.0103457	5.58116e-05	0.978768
Capns1	-1.24698	8.73691	599.556	2.09133e-132	-0.0541955	8.73691	1.15691	0.282108	0.406325	-0.0346222	0	0.316247
Caprin1	0.181098	4.41543	2.84587	0.091609	0.0106074	4.41543	0.00963715	0.921798	-0.0659803	-0.0253858	0.1125	0.927873
Capza1	7.53846	2.15884	262.77	4.27267e-59	-0.173357	2.15884	1.50554e-09	0.999969	-1	0	0	0.999708
Car1	1.50691	4.41902	116.914	2.99828e-27	0.208486	4.41902	2.2451	0.134038	-0.468989	0.0522329	0	0.160873
Car2	-1.19618	3.40264	42.542	6.91808e-11	-0.202493	3.40264	1.22036	0.269289	0.389831	0.0208223	0	0.303285
Car3	0.0977199	12.9526	0.917367	0.338167	-0.060154	12.9526	0.347658	0.555442	-0.0329153	0.0235597	0.370111	0.584076
Car5a	-1.26684	7.91731	525.394	2.83801e-116	0.00963078	7.91731	0.0308141	0.860656	0.412581	-0.00729613	0	0.871163
Car8	0.226124	7.46597	14.1948	0.000164824	-0.016269	7.46597	0.0735253	0.786271	-0.0779573	-0.0492968	0.000324239	0.80146
Carf	-1.82566	2.00531	37.8264	7.73279e-10	-0.49103	2.00531	2.6151	0.105851	0.542533	0.0644347	0	0.129581
Carkd	-0.475718	7.53169	76.6404	2.051e-18	-0.0311196	7.53169	0.328586	0.566493	0.164322	0.0155337	0	0.594707
Cars	0.0620903	6.35991	0.60281	0.437508	0.0331145	6.35991	0.171514	0.678769	-0.020808	-0.0210934	0.46878	0.700783
Cars2	0.294221	5.65195	9.35214	0.00222725	0.0485373	5.65195	0.254571	0.613874	-0.0988322	0.0202559	0.00344437	0.640092
Casc4	-0.424891	3.17633	4.67212	0.030656	-0.0135869	3.17633	0.00439582	0.947138	0.14494	0.0403615	0.0413962	0.951494
Casd1	1.61366	3.67213	99.8705	1.62697e-23	-0.112576	3.67213	0.483925	0.48665	-0.498508	0.0448783	0	0.518277
Casp3	0.059954	2.70872	0.0541265	0.816032	-0.164855	2.70872	0.401087	0.526528	-0.0262565	0.0252531	0.82814	0.556792
Casp7	0.293523	6.32785	14.6402	0.000130109	-0.156238	6.32785	4.15037	0.0416254	-0.100478	-0.0380737	0.000239192	0.0550648
Casp8	0.160208	6.5216	5.58186	0.0181474	0.0240467	6.5216	0.125772	0.722857	-0.0550025	-0.00212294	0.025785	0.742113
Casp8ap2	0.615655	2.9995	9.59134	0.00195497	0.529998	2.9995	7.11391	0.00764882	-0.204756	-0.0486193	0.00308027	0.0114653
Casp9	-8.02453	3.97195	732.946	2.04979e-161	0.568039	3.97195	1.23792	0.265872	0.994298	-0.00322666	0	0.299745
Cast	2.74616	3.41019	128.519	8.64278e-30	-0.269713	3.41019	1.26543	0.260626	-0.716925	0.0547376	0	0.294193
Cat	0.128566	12.6837	10.9421	0.000940023	-0.000479235	12.6837	0.000152097	0.99016	-0.0441775	0.00435258	0.00150957	0.990988
Catsper2	0.189408	3.2149	1.25038	0.263481	0.538677	3.2149	10.1717	0.00142611	-0.0573392	0.0156137	0.294236	0.00228827
Cbfa2t2	-4.99143	5.01058	46.6713	8.3951e-12	0.991365	5.01058	2.15596	0.142018	0.82887	-0.0329702	0	0.169529
Cbfa2t3	0.00817045	2.8891	0.00187857	0.965429	-0.217388	2.8891	1.44622	0.229135	0.00542935	0.00494655	0.967919	0.262136
Cbl	0.0864138	3.61337	0.256298	0.612675	-0.0172673	3.61337	0.0102924	0.919192	-0.0189046	0.0981613	0.63651	0.925401
Cbll1	-0.0266807	3.501	0.0337363	0.854269	0.0529677	3.501	0.133237	0.715099	0.0123807	0.0554289	0.864458	0.734802
Cbr1	1.34105	6.28147	229.343	8.29325e-52	-0.0624519	6.28147	0.50284	0.478255	-0.431239	-0.0845316	0	0.510051
Cbs	-0.401467	9.44908	85.296	2.5688e-20	-0.0352214	9.44908	0.658156	0.417212	0.138402	-0.0134689	0	0.451287
Cbwd1	-0.217628	3.87887	1.40861	0.235287	0.137593	3.87887	0.564681	0.45238	0.0695917	-0.0124704	0.265432	0.485452
Cbx1	-0.340239	4.47893	5.98219	0.014451	0.12564	4.47893	0.816759	0.36613	0.116763	0.0692623	0.0207779	0.400876
Cc2d1a	-0.128232	5.20342	1.61335	0.204022	-0.074197	5.20342	0.540007	0.46243	0.0461048	0.0352615	0.233486	0.494953
Ccar1	0.0913653	3.17121	0.307561	0.579181	-0.179725	3.17121	1.18875	0.275582	-0.0330241	-0.0187305	0.60534	0.309316
Ccdc111	0.0777491	3.14471	0.146689	0.70172	-0.130738	3.14471	0.410293	0.521821	-0.0398893	-0.042072	0.721288	0.552205
Ccdc117	0.782943	4.73382	58.9188	1.64318e-14	-0.0879248	4.73382	0.742061	0.389001	-0.264186	-0.0561251	0	0.423379
Ccdc12	-1.96518	3.09216	115.733	5.43837e-27	0.139097	3.09216	0.570399	0.4501	0.583818	-0.0395946	0	0.483185
Ccdc126	0.281559	2.62745	1.61823	0.203339	-0.25806	2.62745	1.35476	0.244447	-0.0979441	0.0123474	0.23275	0.277849
Ccdc127	-2.14918	5.17546	479.265	3.08746e-106	-0.00733784	5.17546	0.00532486	0.941829	0.633657	0.00891021	0	0.946376
Ccdc130	-0.377977	2.42309	3.04161	0.0811555	0.0245098	2.42309	0.0133846	0.907897	0.147319	0.212089	0.100873	0.914802
Ccdc134	0.321157	3.57747	3.91248	0.0479287	-0.0424231	3.57747	0.0685268	0.793494	-0.106858	-0.0100527	0.0624718	0.808043
Ccdc141	1.96004	5.53484	417.313	9.38157e-93	0.0272054	5.53484	0.0803103	0.776877	-0.59309	-0.0113398	0	0.792442
Ccdc148	-0.543753	3.36305	10.9393	0.000941479	-0.158957	3.36305	0.934051	0.333813	0.185132	-0.0336138	0.00151489	0.368827
Ccdc163	-0.914428	3.58752	21.1753	4.1913e-06	0.00466885	3.58752	0.00049458	0.982257	0.299739	-0.0152729	7.97308e-06	0.983602
Ccdc171	0.516043	3.81928	6.215	0.0126673	0.19941	3.81928	0.930826	0.334648	-0.165703	-0.0590969	0.0182743	0.369712
Ccdc24	0.449586	2.13673	4.53761	0.0331579	-0.259431	2.13673	1.50397	0.220061	-0.152498	-0.110748	0.0444127	0.252765
Ccdc28a	0.519607	6.18015	44.8497	2.12748e-11	0.00447921	6.18015	0.00332149	0.954041	-0.177532	0.00940389	0	0.957777
Ccdc28b	-0.257229	4.36878	3.53812	0.0599733	-0.263746	4.36878	3.71798	0.0538295	0.0879515	0.026514	0.0767489	0.0698283
Ccdc32	-0.179631	3.66378	1.70904	0.19111	0.231277	3.66378	2.83404	0.0922858	0.0611752	0.0670966	0.2201	0.114124
Ccdc41	-0.409298	4.20812	9.72424	0.00181854	0.00243059	4.20812	0.000366472	0.984727	0.136331	0.0771941	0.00286765	0.985922
Ccdc43	-0.145587	2.93297	0.579328	0.446576	-0.00725749	2.93297	0.00145795	0.969542	0.0438147	-0.0235185	0.477449	0.972147
Ccdc47	-0.355848	2.86573	3.19647	0.0737973	-0.193107	2.86573	0.935745	0.333374	0.132189	0.0923959	0.092331	0.368444
Ccdc50	-0.299917	7.19394	27.8834	1.28854e-07	0.0342321	7.19394	0.36348	0.54658	0.104436	0.0164158	0	0.575728
Ccdc55	-0.000628384	4.36755	2.53876e-05	0.99598	-0.194434	4.36755	2.43221	0.118865	0.00276482	0.0202756	0.996229	0.144225
Ccdc58	0.678473	5.23622	21.07	4.42801e-06	0.0916653	5.23622	0.385572	0.534636	-0.224932	-0.0209301	7.97308e-06	0.564303
Ccdc80	-0.290844	2.39798	1.98472	0.158894	0.354985	2.39798	2.95828	0.0854387	0.110793	0.0705025	0.186052	0.106326
Ccdc84	0.0797753	4.03392	0.426323	0.513799	-0.0723895	4.03392	0.351114	0.553483	-0.0284133	-0.0439586	0.542608	0.582226
Ccdc85c	0.294292	4.39978	6.94354	0.00841223	0.151621	4.39978	1.84334	0.17456	-0.100318	0.00570038	0.0123264	0.204749
Ccdc88a	-0.147842	3.73692	0.700953	0.402464	0.0774027	3.73692	0.190975	0.662106	0.0573526	-0.0497759	0.434222	0.684944
Ccdc88c	0.0332813	2.01452	0.0200121	0.887503	0.343418	2.01452	2.183	0.139543	-0.0160778	0.00751923	0.895465	0.166762
Ccdc9	-0.239233	4.40416	5.88086	0.0153063	-0.0602148	4.40416	0.372407	0.541695	0.0757316	-0.00899548	0.0220004	0.571006
Ccdc90b	-0.059973	3.40008	0.0884915	0.766104	-0.265005	3.40008	1.73349	0.187966	0.0131329	-0.132484	0.781944	0.219156
Ccdc91	-0.151825	7.45038	9.85884	0.00169017	-0.0555065	7.45038	1.31777	0.250992	0.0535441	-0.00384868	0.0026258	0.284331
Ccdc93	-0.407465	6.24616	27.8609	1.30359e-07	0.00979062	6.24616	0.0161252	0.898952	0.139923	-0.00965781	0	0.906755
Cchcr1	0.302813	4.07322	0.640307	0.4236	0.403736	4.07322	1.14645	0.284294	-0.0768502	0.222193	0.455141	0.318546
Ccl9	-0.874608	6.70271	162.321	3.52028e-37	-0.0432254	6.70271	0.398838	0.52769	0.294342	-0.018367	0	0.557885
Ccm2l	-0.658226	3.24934	13.3658	0.000256253	0.193775	3.24934	1.15924	0.281624	0.223839	0.0886283	0.000465097	0.315689
Ccna2	-0.35188	3.70468	8.98254	0.00272572	0.0772571	3.70468	0.43256	0.510735	0.121324	-0.0288177	0.0041965	0.541317
Ccnd1	0.0758872	6.40978	1.28524	0.256928	-0.000834881	6.40978	0.000156472	0.99002	-0.0246538	-0.0233959	0.287512	0.990815
Ccnd2	0.0217661	4.15184	0.0304159	0.86155	0.0295322	4.15184	0.0560272	0.812889	-0.00954304	-0.0433964	0.871102	0.826296
Ccndbp1	0.277439	6.30122	15.8934	6.70116e-05	-0.00309205	6.30122	0.00197806	0.964525	-0.0943954	0.0223761	0.00010365	0.967451
Ccng2	-0.193425	3.03461	1.62686	0.202138	-0.120392	3.03461	0.630508	0.427169	0.0734025	0.00309228	0.231376	0.46085
Ccnh	0.165439	3.45568	1.27931	0.258028	-0.265806	3.45568	3.30136	0.0692226	-0.0635097	-0.0205572	0.288705	0.0877331
Ccni	-1.45946	6.96691	351.944	1.59885e-78	-0.0335437	6.96691	0.190322	0.662649	0.464477	-0.012634	0	0.685528
Ccnl2	0.119537	8.1814	9.23329	0.00237654	-0.00898818	8.1814	0.0522101	0.819261	-0.0411524	0.0014261	0.0036942	0.832156
Ccnt2	0.137416	5.0376	3.47145	0.0624364	-0.0340069	5.0376	0.212489	0.644823	-0.0488194	-0.0171934	0.0795661	0.668655
Ccnyl1	-4.91033	2.89537	265.07	1.34741e-59	0.372262	2.89537	1.22143	0.269079	0.933644	0.0113158	0	0.303073
Ccr2	0.459736	4.41229	16.7148	4.34415e-05	-0.0111195	4.41229	0.00991763	0.920672	-0.161071	-0.0403208	7.97308e-05	0.92682
Ccr3	0.844628	2.92517	27.4264	1.63188e-07	-0.22678	2.92517	1.93954	0.163719	-0.286431	-0.0280653	0	0.193119
Ccr5	-0.117788	5.38658	2.50239	0.113673	-0.0178435	5.38658	0.0574403	0.810588	0.0417629	-0.00710355	0.137217	0.824047
Ccrl1	-0.312822	7.16453	42.4747	7.16034e-11	0.00495817	7.16453	0.0106816	0.917684	0.109178	0.0102489	0	0.924003
Ccrn4l	-0.977726	5.74416	72.8114	1.42647e-17	0.061967	5.74416	0.295274	0.58686	0.317518	-0.0136523	0	0.614419
Cct2	0.21108	8.56141	21.504	3.53099e-06	-0.0279035	8.56141	0.375995	0.539755	-0.0724665	0.00183479	5.31539e-06	0.569135
Cct4	0.0858677	6.62027	2.25528	0.133159	-0.0557444	6.62027	0.950536	0.329583	-0.0296049	-0.0188476	0.158553	0.364588
Cct5	-0.108032	8.34761	3.65997	0.0557345	0.0265049	8.34761	0.22032	0.638796	0.0382212	0.0345004	0.0716009	0.663089
Ccz1	-0.211783	5.08229	3.81496	0.0507967	0.169951	5.08229	2.45775	0.116946	0.0726497	0.0357854	0.0658151	0.142112
Cd14	0.527827	3.23426	9.16409	0.0024681	-0.320181	3.23426	3.3744	0.0662169	-0.169042	0.0263251	0.0038324	0.0843632
Cd2ap	-0.0638083	6.86816	1.33885	0.247237	-0.0127818	6.86816	0.0537326	0.816691	0.0225358	-0.00285694	0.277673	0.829759
Cd300ld	-7.38122	2.96348	362.358	8.63125e-81	-1.16651	2.96348	5.07221	0.0243123	0.993151	-0.00684932	0	0.0335215
Cd320	0.130407	3.26916	0.462342	0.496531	-0.30238	3.26916	2.4868	0.114805	-0.0478142	-0.117896	0.52638	0.139739
Cd47	-0.137877	6.7229	3.44816	0.0633223	-0.102363	6.7229	1.90098	0.167969	0.0472867	-0.00559275	0.0806185	0.197719
Cd55	-0.192589	4.05811	2.30476	0.128978	0.103221	4.05811	0.662176	0.415793	0.06833	0.0204492	0.15409	0.449876
Cd59a	0.480286	7.78003	88.8753	4.20503e-21	-0.0201077	7.78003	0.156167	0.69271	-0.164475	-0.00657945	0	0.713641
Cd59b	1.16664	3.72255	4.36295	0.0367285	0.551732	3.72255	0.995186	0.318478	-0.263998	-0.14205	0.0487873	0.353694
Cd63	-0.528456	2.22117	3.15489	0.0756998	0.310138	2.22117	1.0988	0.294529	0.14069	-0.141376	0.0945661	0.329094
Cd68	-0.0652949	5.30484	0.599926	0.438606	0.104661	5.30484	1.5411	0.214454	0.0232914	-0.00962991	0.469838	0.246969
Cd72	-0.356198	5.0592	15.0911	0.000102444	0.0867255	5.0592	0.894481	0.344266	0.122836	-0.0311822	0.000194012	0.379133
Cd74	-0.141359	8.46403	9.30201	0.00228903	-0.00817108	8.46403	0.0310787	0.860065	0.0496034	-0.0186531	0.00354536	0.870626
Cd82	-0.210935	7.55242	18.6861	1.54099e-05	0.026811	7.55242	0.30199	0.582638	0.0734165	0.00199601	2.92346e-05	0.610332
Cd86	-0.307841	2.69605	2.63895	0.104272	0.175389	2.69605	0.855167	0.355095	0.0970355	0.0188915	0.126729	0.389684
Cd97	-0.119906	6.92837	4.72792	0.0296768	0.00607087	6.92837	0.0121233	0.912325	0.0426383	-0.017144	0.0402614	0.918993
Cdadc1	0.328707	2.02922	1.48804	0.222521	0.369366	2.02922	1.86776	0.171732	-0.0811048	0.182819	0.252577	0.201857
Cdan1	-0.412645	5.09212	18.9426	1.3471e-05	0.0376291	5.09212	0.157674	0.691307	0.141204	0.018731	2.39192e-05	0.712291
Cdc14b	0.19177	4.01307	2.26519	0.13231	-0.0383914	4.01307	0.0906541	0.763347	-0.0738362	-0.0157728	0.157604	0.779704
Cdc16	0.296169	6.25498	16.6521	4.48996e-05	-0.0897033	6.25498	1.52845	0.216345	-0.101284	-0.0161331	7.97308e-05	0.248869
Cdc23	0.0261788	4.12473	0.0538114	0.816559	-0.157757	4.12473	1.9555	0.161996	-0.0060418	-0.0417687	0.828685	0.191245
Cdc27	0.207896	5.1305	4.85821	0.0275148	-0.0860967	5.1305	0.833836	0.361166	-0.0691678	0.0109927	0.0376117	0.395951
Cdc37	-0.0617131	4.9933	0.403902	0.525081	-0.0476675	4.9933	0.241092	0.623418	0.0228408	-0.00765834	0.553396	0.648977
Cdc42	0.0809536	8.31871	3.22133	0.0726846	0.0308842	8.31871	0.468876	0.493505	-0.0278712	-0.0162476	0.0910313	0.524849
Cdc42bpb	0.238506	6.93192	18.7156	1.51736e-05	-0.0671904	6.93192	1.48587	0.222859	-0.0814749	-0.00525932	2.92346e-05	0.255652
Cdc42ep2	-0.157001	2.92821	0.665271	0.414705	-0.190404	2.92821	0.980156	0.32216	0.0540264	0.0677117	0.446368	0.357324
Cdc42ep5	-0.57486	2.6404	7.21331	0.0072365	-0.252599	2.6404	1.4096	0.235122	0.163094	0.0405478	0.0106999	0.268353
Cdc42se2	6.53141	3.35709	79.3879	5.10377e-19	-0.937699	3.35709	2.04517	0.15269	-0.943324	-0.0187973	0	0.180986
Cdc5l	-0.510444	4.73997	21.6118	3.33792e-06	0.0454886	4.73997	0.171751	0.678561	0.176793	0.0026306	2.65769e-06	0.700574
Cdc73	0.0902308	4.19186	0.73531	0.391168	0.128017	4.19186	1.47967	0.223826	-0.030525	0.024881	0.422911	0.256622
Cdca4	0.207804	3.00783	1.87353	0.171072	0.0892892	3.00783	0.346061	0.556352	-0.0654846	0.000976487	0.199011	0.58485
Cdcp1	-2.11383	3.01709	165.799	6.12145e-38	-0.0329584	3.01709	0.0336493	0.854455	0.628277	0.0041719	0	0.865425
Cdh2	0.0122061	6.1734	0.0221081	0.8818	0.125931	6.1734	2.35501	0.124881	-0.00400966	0.0208654	0.890163	0.1508
Cdk10	-0.238433	4.88655	4.93923	0.0262537	-0.0312345	4.88655	0.0848017	0.770893	0.083292	0.0011926	0.0360357	0.786701
Cdk11b	0.509564	3.1042	4.94881	0.0261087	0.190302	3.1042	0.692813	0.405209	-0.158536	-0.0284947	0.0358762	0.43954
Cdk14	0.500357	2.9878	5.32344	0.0210405	-0.10379	2.9878	0.229835	0.631646	-0.159577	-0.0654622	0.0295243	0.656724
Cdk17	-0.122766	6.03313	3.47812	0.0621853	0.058385	6.03313	0.786633	0.37512	0.0430944	-0.0028362	0.0793056	0.409896
Cdk18	-0.00755349	5.81435	0.00885175	0.925043	0.0590499	5.81435	0.54257	0.461369	0.00330309	0.0284615	0.930507	0.493964
Cdk2	-0.0527184	3.17537	0.0976183	0.754707	0.172932	3.17537	1.05035	0.305427	0.0208435	0.160347	0.771069	0.340323
Cdk2ap1	4.20237	4.28657	718.895	2.32781e-158	-0.0593998	4.28657	0.115549	0.733913	-0.897717	0.00556124	0	0.752454
Cdk4	5.76778	4.97339	1251.1	4.79139e-274	-0.218646	4.97339	1.05619	0.304085	-0.96451	0.00555211	0	0.338944
Cdk5rap3	-0.165947	7.74981	10.8114	0.00100877	-0.000951266	7.74981	0.000354237	0.984984	0.0570738	0.0085631	0.00162651	0.986153
Cdk6	7.00855	4.34765	934.847	2.61066e-205	0.68856	4.34765	3.38235	0.0658979	-0.984546	-0.00547747	0	0.084015
Cdk8	-3.18489	5.18588	852.231	2.37998e-187	0.162038	5.18588	2.04184	0.153025	0.802063	0.0352837	0	0.181414
Cdkn1a	-0.57584	3.48999	16.0214	6.26315e-05	-0.0458316	3.48999	0.0993299	0.752635	0.213993	0.0582538	9.83347e-05	0.769907
Cdkn1b	-0.112309	5.58657	2.27607	0.131384	-0.0357334	5.58657	0.230439	0.631198	0.0378741	0.00687641	0.156626	0.656299
Cdkn2aipnl	-0.156782	4.3673	2.66359	0.102669	-0.0929758	4.3673	0.936658	0.333139	0.0574777	0.00318563	0.124994	0.368237
Cdon	-0.104221	2.11613	0.115557	0.733904	0.0992353	2.11613	0.101742	0.749749	0.0589942	0.140777	0.751514	0.767205
Cdt1	0.405391	3.72501	6.13785	0.0132318	0.0426165	3.72501	0.0681884	0.793993	-0.134325	0.0038474	0.0190769	0.808548
Cdv3	0.832067	7.49548	216.509	5.22383e-49	-0.0311536	7.49548	0.305726	0.580315	-0.279871	-0.0429388	0	0.608115
Cdyl	-0.0165493	2.57957	0.00557839	0.940462	-0.262536	2.57957	1.42853	0.232005	-0.00243452	-0.0344834	0.944887	0.265113
Cdyl2	0.160193	3.06606	0.697012	0.40379	0.0481399	3.06606	0.0627169	0.802252	-0.0544446	-0.0516748	0.435463	0.81643
Ceacam1	-0.115095	8.28656	4.90032	0.0268517	-0.0123435	8.28656	0.0563726	0.812324	0.0405963	0.0116459	0.0367745	0.825751
Ceacam2	-1.66284	7.08145	462.716	1.23253e-102	-0.0114175	7.08145	0.0224755	0.880829	0.518043	0.0109493	0	0.889788
Cebpa	0.70067	6.07656	110.653	7.04722e-26	-0.0384545	6.07656	0.332885	0.563965	-0.239696	-0.01655	0	0.592315
Cebpg	0.181459	7.25794	12.1928	0.000479736	-0.00324765	7.25794	0.00391353	0.950118	-0.0622941	0.00330245	0.000805281	0.954163
Cecr2	-0.344659	4.62102	10.3936	0.0012645	0.0468386	4.62102	0.19173	0.66148	0.119208	0.0231048	0.00202516	0.684332
Cecr5	-0.155448	5.75254	2.16134	0.141522	0.159391	5.75254	2.27264	0.131676	0.0535199	-0.00886412	0.167735	0.158412
Cela1	-1.84687	4.96661	183.193	9.73458e-42	-0.105401	4.96661	0.60588	0.436343	0.555398	-0.0118583	0	0.470024
Celf2	-0.0423796	3.9367	0.0687939	0.793101	0.236515	3.9367	2.14599	0.142943	0.0149007	0.0962887	0.806639	0.17052
Celsr1	0.132364	4.65429	1.39207	0.238055	-0.025761	4.65429	0.0526675	0.818485	-0.0456144	0.0219102	0.268236	0.831393
Cenpc1	0.100764	3.54249	0.285335	0.593225	-0.0199576	3.54249	0.0111642	0.915851	-0.0319804	0.0395819	0.618448	0.922284
Cenpm	-1.28556	2.63554	13.5454	0.000232867	0.375402	2.63554	1.15426	0.282659	0.40526	-0.153519	0.000425231	0.316837
Cenpo	-0.714066	4.23273	26.8132	2.24096e-07	-0.0510492	4.23273	0.137682	0.710597	0.232662	-0.0373076	0	0.730627
Cenpq	0.258305	4.98935	5.51032	0.0189045	0.0643837	4.98935	0.342403	0.558445	-0.0859681	0.0437219	0.0267869	0.586928
Cep120	0.65654	2.66664	6.98226	0.00823215	-0.443894	2.66664	3.21062	0.0731618	-0.183812	0.0541526	0.0120633	0.0922034
Cep135	0.188685	2.99065	0.994382	0.318674	-0.207599	2.99065	1.19987	0.273348	-0.0663488	-0.0249475	0.350446	0.307163
Cep164	-0.140814	2.51203	0.544866	0.460423	-0.0485627	2.51203	0.0650277	0.798719	0.059367	0.02044	0.491054	0.813177
Cep170	-0.184004	3.76396	2.0201	0.155229	-0.296171	3.76396	5.24201	0.0220478	0.0580937	-0.058639	0.182129	0.0305608
Cep170b	-0.304768	6.01747	16.3641	5.22647e-05	0.0420799	6.01747	0.312084	0.576404	0.104392	0.0242038	8.50462e-05	0.604229
Cep19	-0.313694	2.68976	2.05465	0.151742	-0.473708	2.68976	4.69966	0.0301686	0.0732851	-0.118731	0.178469	0.0409444
Cep192	-0.760735	4.87533	75.8336	3.08598e-18	0.074952	4.87533	0.732148	0.392188	0.259911	0.0281881	0	0.426478
Cep250	-0.517281	5.25264	27.7535	1.37799e-07	-0.0682611	5.25264	0.483579	0.486806	0.175562	-0.027405	0	0.51842
Cep290	-0.201455	4.1903	3.14817	0.0760122	-0.0151002	4.1903	0.0175933	0.894478	0.0620003	-0.0376168	0.0948584	0.902731
Cep44	0.204247	4.65505	3.25207	0.0713334	-0.0307459	4.65505	0.073419	0.786422	-0.0737186	-0.0340913	0.0895563	0.801598
Cep63	0.594438	4.15967	17.6565	2.64614e-05	-0.426603	4.15967	9.1093	0.00254313	-0.192652	0.0442676	5.31539e-05	0.00399983
Cep68	-0.160466	4.89563	3.61721	0.0571848	-0.147843	4.89563	3.0706	0.0797198	0.0538044	-0.017343	0.0733098	0.0997884
Cep70	-0.951852	3.36347	20.441	6.14975e-06	-0.0902639	3.36347	0.189216	0.66357	0.293825	-0.139703	7.97308e-06	0.686368
Cep76	0.244238	3.72631	2.13463	0.144005	0.0474903	3.72631	0.0805287	0.776582	-0.0831238	0.00472364	0.170342	0.792147
Cep85	-0.844429	3.72885	27.8981	1.27873e-07	-0.311148	3.72885	3.79095	0.0515303	0.278706	-0.00248865	0	0.0671254
Cep85l	-0.044374	4.63169	0.178698	0.672495	0.0415034	4.63169	0.156698	0.692215	0.0167155	0.0518625	0.693361	0.713128
Cep97	0.280024	3.74944	4.83508	0.0278863	0.0864433	3.74944	0.46023	0.497516	-0.0979015	0.00281328	0.0380289	0.528828
Cerk	-0.0475775	4.45076	0.0794768	0.778008	-0.150476	4.45076	0.796247	0.372218	0.014394	0.0369459	0.792867	0.407108
Cers5	0.474035	2.93034	5.39393	0.0202069	-0.0146611	2.93034	0.00505679	0.943309	-0.166189	-0.0413698	0.0284745	0.947843
Ces1b	2.49921	5.33347	631.295	2.61344e-139	0.144647	5.33347	2.05643	0.151565	-0.699903	0.0167311	0	0.179875
Ces2g	-8.64387	4.07701	848.868	1.28124e-186	-1.03846	4.07701	4.14937	0.04165	0.996225	-0.00127525	0	0.0550887
Cetn3	-10.0227	5.23647	1808.49	0	0.821618	5.23647	2.90476	0.0883184	0.998408	-0.00159236	0	0.109749
Cfb	-0.137114	12.1345	11.6222	0.00065168	-0.0182357	12.1345	0.205649	0.650199	0.0478371	-0.00500061	0.00108168	0.673779
Cfdp1	0.0762023	4.37895	0.521074	0.470384	-0.0884347	4.37895	0.701609	0.402244	-0.0281764	-0.0248498	0.500938	0.436532
Cfh	-1.27191	9.65064	264.469	1.82117e-59	0.0668653	9.65064	0.751847	0.385892	0.410985	0.0477912	0	0.420407
Cfhr2	-0.320896	6.64006	21.6536	3.26599e-06	0.0480029	6.64006	0.484653	0.486322	0.111664	0.018246	2.65769e-06	0.517961
Cfl2	0.0232701	6.24109	0.102805	0.748489	-0.0612863	6.24109	0.713036	0.398438	-0.00788133	-0.023679	0.765206	0.432734
Cflar	-1.42695	3.15506	16.0526	6.16074e-05	0.218094	3.15506	0.377131	0.539143	0.41951	-0.080672	9.5677e-05	0.568555
Cgn	3.96114	2.21999	85.9733	1.82384e-20	-0.153171	2.21999	0.0996405	0.752261	-0.871348	0.0657088	0	0.769573
Cgnl1	0.410883	8.22339	82.5323	1.03956e-19	-0.0375131	8.22339	0.689276	0.406411	-0.140813	0.00607114	0	0.44064
Cgrrf1	0.0381731	4.81967	0.148121	0.700337	0.114246	4.81967	1.32627	0.249471	-0.0131859	0.00989633	0.719903	0.282832
Chac1	0.000419332	5.40234	1.4186e-05	0.996995	0.0504637	5.40234	0.285532	0.593098	0.00790541	-0.0405855	0.997217	0.620417
Chad	1.02178	4.29333	37.6564	8.43673e-10	-0.275936	4.29333	2.76441	0.0963821	-0.327694	-0.0820498	0	0.118977
Champ1	-0.0473544	4.68881	0.17926	0.67201	-0.100287	4.68881	0.804278	0.369817	0.0153672	-0.00689822	0.692895	0.404679
Chchd3	0.164156	5.4822	3.83626	0.0501554	0.021181	5.4822	0.0637934	0.800598	-0.0570039	-0.0066962	0.0651215	0.814921
Chchd6	0.353085	2.58852	3.44295	0.0635222	-0.488843	2.58852	6.6088	0.0101476	-0.133892	-0.108561	0.0808471	0.0150425
Chd1	-0.253449	6.08722	15.4161	8.62521e-05	0.0547138	6.08722	0.718409	0.396666	0.0886536	0.00612679	0.000156804	0.43103
Chd2	0.035464	5.38369	0.151352	0.697247	-0.220698	5.38369	5.85971	0.0154913	-0.0135834	-0.00528934	0.716892	0.0221864
Chd3	0.211563	8.10469	13.8147	0.000201753	-0.0711491	8.10469	1.56341	0.211167	-0.0720147	-0.00823227	0.000388023	0.243586
Chd4	0.0301337	7.28805	0.241178	0.623356	-0.0161499	7.28805	0.0692714	0.792401	-0.00931371	0.0362707	0.646782	0.806948
Chd7	-0.10641	2.9556	0.408066	0.522953	-0.198865	2.9556	1.42671	0.232303	0.035849	-0.0572935	0.551315	0.265376
Chd8	-0.175177	5.10105	3.26497	0.0707744	-0.126422	5.10105	1.69997	0.192291	0.0627852	0.037927	0.0889318	0.223698
Chmp1a	-0.10715	6.90794	2.77455	0.0957736	-0.00721394	6.90794	0.0125776	0.910705	0.039085	-0.00915147	0.117252	0.917481
Chmp2a	-0.00863447	6.8938	0.0243208	0.876071	0.0531589	6.8938	0.921863	0.336986	0.00318478	-0.0130741	0.884794	0.372027
Chmp4b	-1.19565	6.50899	146.143	1.20786e-33	0.0237075	6.50899	0.0584978	0.808886	0.387794	-0.0211221	0	0.822506
Chmp5	-0.238853	5.12867	5.38709	0.0202863	0.121983	5.12867	1.40542	0.235819	0.0858618	0.0679213	0.0285968	0.269062
Chn2	-0.319136	2.53033	2.35188	0.125132	-0.0321131	2.53033	0.0246261	0.875302	0.112068	-0.0695388	0.149939	0.88468
Chp1	-0.765477	9.64575	378.983	2.07236e-84	-0.00307194	9.64575	0.00616222	0.93743	0.259526	0.00545808	0	0.942256
Chpf2	-0.0981068	4.68886	0.674084	0.411631	0.0052808	4.68886	0.00196805	0.964615	0.0344254	0.0580798	0.443351	0.967552
Chpt1	0.327087	8.93444	39.9602	2.59185e-10	-0.0611617	8.93444	1.39953	0.236803	-0.112587	-0.000163841	0	0.270038
Chrd	-0.212597	2.83408	1.26133	0.2614	0.103597	2.83408	0.300488	0.583576	0.0615112	-0.0379721	0.292083	0.611259
Chst2	0.0780521	3.86506	0.374589	0.540513	-0.109351	3.86506	0.735454	0.391121	-0.026865	0.0543427	0.568287	0.425436
Chtop	-0.130932	4.69103	2.33491	0.126502	-0.0606982	4.69103	0.501662	0.478771	0.0419536	-0.0289398	0.151446	0.510578
Chuk	-9.56611	6.46293	135.442	2.64332e-31	-0.154735	6.46293	0.0757485	0.783144	0.995183	0.000403372	0	0.798496
Cidec	-0.00796314	3.80616	0.00540032	0.941419	0.870595	3.80616	0.928715	0.335197	-0.0450725	0.0725526	0.945778	0.370238
Ckap4	0.426318	2.79297	4.03055	0.0446834	0.099324	2.79297	0.218587	0.640118	-0.152531	-0.0248183	0.0586234	0.664243
Clasp1	0.593387	4.58168	25.7796	3.82709e-07	-0.00778321	4.58168	0.00456308	0.946143	-0.204735	-0.0550879	0	0.950588
Clasrp	0.204872	2.43475	0.837579	0.36009	0.0767643	2.43475	0.118438	0.730735	-0.0579338	-0.0532616	0.392467	0.749542
Clca1	-1.10458	5.65593	115.515	6.07029e-27	-0.045205	5.65593	0.194781	0.658967	0.365867	0.0124105	0	0.681927
Clcn2	0.312803	4.27496	6.54419	0.0105227	0.0498189	4.27496	0.165984	0.683706	-0.109715	0.0109369	0.0152685	0.705294
Clcn3	0.0125188	6.26928	0.0194344	0.889128	-0.014709	6.26928	0.026799	0.869964	-0.00451778	-0.0529406	0.896951	0.879814
Clcn4-2	0.523655	5.86572	32.4261	1.23813e-08	0.0298389	5.86572	0.10553	0.745292	-0.176634	0.0686746	0	0.763075
Clcn7	-0.175621	6.8576	10.852	0.000986873	0.080928	6.8576	2.30476	0.128978	0.0593086	-0.0102572	0.00159196	0.155385
Cldn1	-0.212173	6.41795	12.9345	0.000322586	-0.0478477	6.41795	0.657761	0.417351	0.0722971	-0.0034176	0.000560773	0.451409
Cldn12	0.217389	8.76077	20.1718	7.07879e-06	0.0193714	8.76077	0.160285	0.688895	-0.0745632	0.00220203	7.97308e-06	0.710184
Cldn14	8.52455	3.03771	459.696	5.59953e-102	-0.201983	3.03771	6.26776e-09	0.999937	-1	0	0	0.999702
Cldn25	0.726065	6.00974	78.6134	7.55368e-19	0.035569	6.00974	0.188962	0.663782	-0.244097	0.0425733	0	0.686554
Clec1a	-0.0152271	3.32579	0.0108476	0.917049	-0.215692	3.32579	2.16059	0.14159	0.0132107	-0.0100043	0.923129	0.169075
Clec1b	-0.265755	5.94589	13.2282	0.000275765	-0.0430653	5.94589	0.347378	0.555601	0.0906536	-0.00426776	0.000491673	0.584217
Clec2d	0.901325	2.5794	17.5407	2.81223e-05	0.0134003	2.5794	0.0057209	0.939708	-0.289385	0.0278028	5.58116e-05	0.94439
Clec4a1	-0.318269	2.70687	2.09363	0.147914	-0.104611	2.70687	0.225201	0.635105	0.109097	-0.0661097	0.174435	0.659826
Clec4a2	0.494801	3.90444	11.3949	0.000736462	0.0813534	3.90444	0.308252	0.578755	-0.167614	0.0752244	0.00120659	0.606605
Clec4a3	0.625867	2.86864	11.0283	0.000897306	0.262828	2.86864	1.94269	0.163377	-0.202663	0.0940527	0.00143515	0.192786
Clec7a	-0.855094	4.75623	54.6506	1.43981e-13	0.104059	4.75623	0.812561	0.367364	0.290092	0.065933	0	0.4022
Clec9a	-0.226639	4.72625	5.01312	0.0251559	-0.113207	4.72625	1.25052	0.263453	0.0780084	-0.00991014	0.0346643	0.297242
Clic1	-0.111277	4.86652	0.950343	0.329632	-0.0791404	4.86652	0.480733	0.48809	0.0404827	0.0550425	0.361534	0.51964
Clic4	0.0400312	7.01762	0.491888	0.483086	0.0364378	7.01762	0.407536	0.523223	-0.0132597	0.00057049	0.513469	0.553555
Clic5	-1.02158	3.59326	25.7927	3.80117e-07	0.0347517	3.59326	0.0357746	0.849982	0.319078	0.0245617	0	0.861228
Clint1	-0.00294582	6.16012	0.00218215	0.962742	-0.0487337	6.16012	0.597063	0.439701	0.00105871	-0.0293799	0.965399	0.473242
Clip1	-0.0932539	3.90075	0.592238	0.441555	-0.268253	3.90075	4.90616	0.026761	0.0326973	-0.00250974	0.472519	0.0365141
Clip2	-0.0425265	3.81967	0.12624	0.722363	-0.0331225	3.81967	0.0765606	0.782014	0.0118221	-0.0283209	0.740625	0.797383
Clk1	-0.374988	4.70556	15.5474	8.04641e-05	-0.170084	4.70556	3.1968	0.0737825	0.129902	0.0419901	0.000143515	0.0929582
Clk2	-0.0202484	3.87783	0.0233311	0.878599	0.190597	3.87783	2.0709	0.150133	0.00617021	-0.00105447	0.887146	0.178305
Clk4	-0.247989	4.75076	8.33095	0.00389753	0.00643529	4.75076	0.00563538	0.94016	0.0883063	-0.00273079	0.00588148	0.944805
Clmn	-0.145658	7.92759	10.5069	0.00118927	0.00493217	7.92759	0.0120532	0.912578	0.0509452	-0.0118875	0.0019162	0.919201
Cln3	-0.222608	4.69223	3.95654	0.0466895	0.140455	4.69223	1.5747	0.209525	0.0771801	0.0275442	0.0609728	0.241956
Clock	-0.0458781	5.13577	0.239618	0.624482	0.0870655	5.13577	0.862608	0.35301	0.0150074	-0.00376929	0.647906	0.387688
Clp1	0.277348	5.18571	10.384	0.00127115	-0.0666314	5.18571	0.599402	0.438806	-0.0920659	0.00178703	0.00203845	0.472389
Clptm1	0.120703	4.99911	2.34515	0.125674	-0.0216851	4.99911	0.0755327	0.783445	-0.0423762	0.0152086	0.15054	0.798791
Clstn2	3.34485	2.29615	77.6286	1.24354e-18	0.61714	2.29615	2.49493	0.114214	-0.81348	-0.0721053	0	0.139125
Clstn3	-0.518061	2.87169	6.21993	0.012632	-0.526066	2.87169	6.42799	0.0112336	0.147804	-0.112972	0.0182238	0.0165096
Cluap1	-0.823353	2.65064	11.4006	0.000734194	-0.0552398	2.65064	0.0495014	0.823933	0.270525	-0.0371025	0.00120394	0.836557
Cluh	0.0848675	8.50373	4.10307	0.0428055	-0.032636	8.50373	0.606812	0.435991	-0.0292929	-0.00607802	0.0562395	0.469681
Clybl	0.289016	3.25677	2.13183	0.144268	0.304932	3.25677	2.37042	0.123654	-0.0940235	0.0292955	0.170595	0.149402
Cmah	-0.0390852	8.88427	0.783003	0.376224	-0.0365717	8.88427	0.685525	0.407691	0.0139602	-0.0170207	0.408344	0.44189
Cmas	0.116734	7.41352	5.10271	0.0238885	0.0316156	7.41352	0.37429	0.540675	-0.0404895	0.0133691	0.0331973	0.569977
Cmbl	-0.0226804	6.34876	0.101054	0.750569	-0.00113518	6.34876	0.00025363	0.987294	0.0110038	0.0262019	0.767165	0.988306
Cmc1	-0.467034	3.93824	8.58062	0.00339759	-0.124276	3.93824	0.608041	0.435526	0.156413	-0.0153755	0.00519579	0.469205
Cmklr1	0.212529	2.57485	1.22817	0.267764	0.0196477	2.57485	0.0102756	0.919258	-0.0683789	0.0213843	0.298544	0.925465
Cml1	-0.754244	8.03917	245.202	2.88694e-55	0.0058123	8.03917	0.0146326	0.903719	0.255619	-0.000363071	0	0.911127
Cml2	1.73468	2.62752	91.9705	8.79799e-22	0.0232032	2.62752	0.0152579	0.901693	-0.532923	0.0138616	0	0.909189
Cmpk2	-0.234857	3.08945	2.29038	0.130178	0.282301	3.08945	3.30914	0.0688955	0.0816174	0.0479443	0.155294	0.0873717
Cmss1	-0.55647	3.27028	8.32732	0.00390533	0.0500191	3.27028	0.0673683	0.795208	0.182337	0.0201509	0.00588679	0.809736
Cmtm6	-0.0507219	7.25863	1.07635	0.299515	0.0126307	7.25863	0.0667878	0.796072	0.0174137	-0.00746599	0.330638	0.810631
Cmtm7	0.0804363	3.248	0.177064	0.673909	-0.0269016	3.248	0.0194208	0.889167	-0.0309195	0.0426613	0.694867	0.897867
Cmtm8	0.00516614	6.82088	0.00743978	0.931264	-0.0314436	6.82088	0.275822	0.599453	-0.00159882	-0.0124453	0.936181	0.626264
Cnbd2	0.297131	4.41025	9.29779	0.00229431	0.33415	4.41025	11.7607	0.00060494	-0.0993269	0.02693	0.00355334	0.000993978
Cnep1r1	0.18374	3.61775	1.84246	0.174663	-0.0474863	3.61775	0.123475	0.725296	-0.0675049	-0.0467943	0.20275	0.744452
Cnih	-7.33413	4.55642	1011.46	5.79027e-222	0.191897	4.55642	0.284004	0.594089	0.987806	-0.00633914	0	0.62131
Cnih4	0.000768359	3.45781	1.94381e-05	0.996482	-0.0650937	3.45781	0.1388	0.709477	0.00281173	0.0546104	0.996675	0.72955
Cnot1	-0.259838	4.62089	5.2233	0.0222862	-0.0979774	4.62089	0.74252	0.388855	0.0892348	0.0140699	0.0311934	0.423233
Cnot2	0.115561	4.0823	0.337629	0.561201	0.312708	4.0823	2.47607	0.115591	-0.0380262	0.0585775	0.588305	0.140619
Cnot4	0.1523	4.12763	0.973657	0.32377	-0.0549211	4.12763	0.127291	0.721257	-0.0579457	-0.0724589	0.355416	0.740577
Cnot6	-2.70892	3.1262	186.471	1.87317e-42	0.228107	3.1262	1.23665	0.266117	0.734766	0.0104328	0	0.299998
Cnot6l	0.0525942	5.50542	0.391891	0.531307	0.024645	5.50542	0.0860269	0.76929	-0.0193003	-0.0631585	0.559548	0.785266
Cnp	-0.389628	4.16761	13.0834	0.00029792	0.219761	4.16761	4.15929	0.0414068	0.133425	0.0370766	0.000523566	0.0548096
Cnpy2	-0.321249	7.59754	37.701	8.24603e-10	0.017538	7.59754	0.112472	0.737347	0.112404	0.0200829	0	0.755683
Cnpy3	-0.000431646	4.4251	1.63805e-05	0.996771	0.0948174	4.4251	0.871422	0.350562	0.00207575	0.0193052	0.996973	0.385382
Cntd1	0.152096	5.82289	3.88549	0.048705	0.0728533	5.82289	0.89151	0.345069	-0.0532178	-0.0509428	0.0633568	0.380024
Cntnap1	0.752594	3.31707	17.1624	3.43156e-05	0.164709	3.31707	0.821588	0.364716	-0.248585	-0.0945575	6.1127e-05	0.39955
Cntrob	-0.586516	3.61829	14.4755	0.000141998	-0.0864158	3.61829	0.315337	0.574424	0.197834	-0.00552654	0.000257796	0.602308
Cobl	0.855087	3.33977	17.7924	2.46366e-05	0.330219	3.33977	2.66119	0.102824	-0.266584	-0.101535	4.78385e-05	0.126262
Cog2	-0.0925369	6.01368	1.41403	0.234389	0.02973	6.01368	0.145925	0.702461	0.0317091	0.0106024	0.264552	0.722906
Cog6	0.136224	6.1852	3.15882	0.0755177	0.0260168	6.1852	0.115227	0.73427	-0.0457687	0.0302859	0.0943349	0.752779
Coil	0.189114	4.35602	3.08367	0.0790818	0.0115457	4.35602	0.0114754	0.914691	-0.0655086	-0.0384725	0.0984782	0.921165
Col11a2	-0.575418	3.89337	0.877684	0.348837	0.101461	3.89337	0.0328063	0.856269	0.148836	-0.111091	0.380919	0.867123
Col12a1	0.665332	2.62342	10.1128	0.00147243	-0.163528	2.62342	0.615988	0.432542	-0.226745	-0.105143	0.00230422	0.466215
Col13a1	0.00411283	3.42421	0.000441469	0.983237	-0.406289	3.42421	3.98703	0.0458517	-0.0224937	-0.0454582	0.984527	0.0601383
Col14a1	0.0989806	5.30273	0.905535	0.341302	0.0206082	5.30273	0.0392486	0.842957	-0.033999	0.0155231	0.373204	0.854494
Col16a1	-0.142685	4.25359	0.840565	0.359235	0.490624	4.25359	9.92261	0.00163261	0.0495897	-0.014443	0.39163	0.00258859
Col1a2	-0.28195	5.12844	6.58536	0.0102821	0.0315265	5.12844	0.0824608	0.77399	0.0965193	0.0700692	0.014915	0.789596
Col20a1	1.73836	2.8623	85.106	2.82785e-20	-0.0953699	2.8623	0.25723	0.612029	-0.542087	-0.0943483	0	0.638389
Col27a1	0.470813	7.10241	20.1255	7.2524e-06	-0.0340373	7.10241	0.105811	0.744965	-0.159105	0.031844	7.97308e-06	0.762745
Col4a2	0.117759	6.97819	3.65501	0.0559009	0.0276508	6.97819	0.201587	0.653443	-0.0400838	-0.0257699	0.0718162	0.676737
Col4a3	1.65941	3.05312	6.42814	0.0112326	0.00440806	3.05312	0.0049361	0.943989	-0.381503	0.0943662	0.016297	0.948486
Col4a3bp	-5.31254	3.24624	368.91	3.23201e-82	-0.14023	3.24624	0.163615	0.68585	0.954682	-0.0114278	0	0.70722
Col6a3	-0.00341755	3.95628	0.000365668	0.984743	-0.208819	3.95628	1.50842	0.21938	-0.0019187	0.00363639	0.985946	0.252
Col8a1	-0.200678	2.32339	0.59537	0.44035	0.456883	2.32339	3.04904	0.0807847	0.0601819	-0.0213474	0.471329	0.101083
Colec10	-0.0174661	7.28637	0.117799	0.731434	-0.0528763	7.28637	1.07946	0.298819	0.00709244	-0.00189552	0.749175	0.333551
Colec11	-9.37176	4.3823	88.5121	5.05249e-21	0.515818	4.3823	1.02805	0.310618	0.984375	0.015625	0	0.345516
Colgalt2	1.72104	3.58417	116.965	2.92106e-27	-0.095877	3.58417	0.35269	0.552594	-0.532639	0.0221683	0	0.581349
Commd1	0.0418526	4.1774	0.0855936	0.769856	-0.0558119	4.1774	0.152167	0.696473	-0.014195	-0.0215269	0.785397	0.71728
Commd10	-1.63222	2.63669	15.4145	8.63241e-05	-0.975706	2.63669	5.58954	0.018068	0.407313	0.0522803	0.000156804	0.0254953
Commd2	1.43837	6.96898	553.329	2.37521e-122	0.00188994	6.96898	0.000969297	0.975163	-0.459599	-0.00179767	0	0.977125
Commd9	0.207697	6.35537	11.5704	0.000670086	-0.0972157	6.35537	2.53527	0.111328	-0.0699665	0.00876651	0.00110029	0.135827
Comtd1	-0.275428	2.54376	1.80934	0.178587	0.382118	2.54376	3.47142	0.0624377	0.102565	0.115381	0.206801	0.0800205
Copb1	0.301469	7.94537	38.7852	4.73091e-10	0.0149242	7.94537	0.0951153	0.757772	-0.103937	-0.0173158	0	0.774691
Copb2	0.0852719	8.94244	3.66798	0.0554675	-0.0373167	8.94244	0.702518	0.401939	-0.0293007	-0.0206844	0.0713033	0.436255
Coprs	0.772364	3.71591	29.2836	6.25225e-08	0.229405	3.71591	2.58126	0.108135	-0.255711	-0.00661361	0	0.13221
Cops2	0.250816	3.55741	3.33198	0.0679452	0.143048	3.55741	1.08339	0.29794	-0.0859937	0.0599487	0.0857372	0.332672
Cops3	0.48215	5.2485	39.3988	3.45514e-10	0.0205775	5.2485	0.0718478	0.788665	-0.168318	-0.0273467	0	0.803647
Cops5	5.22821	6.87206	705.427	1.975e-155	-0.0546263	6.87206	0.0938768	0.759305	-0.944875	0.00443328	0	0.776092
Cops7a	-0.150034	6.4052	4.36125	0.0367653	-0.0271236	6.4052	0.142491	0.705818	0.0524662	0.00333853	0.0488458	0.726135
Cops7b	-0.344714	2.40704	2.19422	0.138529	0.16833	2.40704	0.527061	0.467845	0.103697	-0.0457562	0.16453	0.500231
Cops8	-0.0183855	5.29066	0.0528937	0.818102	-0.0871093	5.29066	1.18875	0.275582	0.00887928	0.0312122	0.830306	0.309316
Copz2	0.578321	6.07859	36.9308	1.22399e-09	0.0579202	6.07859	0.371896	0.541973	-0.196494	-0.00697591	0	0.571287
Coq10a	-0.0791695	5.50821	1.09341	0.295716	0.0509715	5.50821	0.453111	0.500861	0.0289064	0.0201276	0.326846	0.53194
Coq10b	-0.051192	6.45424	0.75108	0.386134	0.0851638	6.45424	2.07852	0.149385	0.0191016	-0.0194299	0.418183	0.177481
Coq2	8.17259	4.75595	1296.5	6.51568e-284	-0.151565	4.75595	0.137028	0.711254	-0.994218	0.00578182	0	0.731203
Coq5	-0.00411621	5.51778	0.00281407	0.957694	-0.0331994	5.51778	0.182508	0.669227	0.00201106	-0.034439	0.960719	0.69187
Coro1a	-0.0249278	3.11941	0.0189498	0.89051	-0.363491	3.11941	4.073	0.0435739	0.00987311	0.016951	0.898271	0.0573105
Coro1c	3.43439	3.41686	167.555	2.52993e-38	-0.117195	3.41686	0.205491	0.650325	-0.816222	-0.0190586	0	0.673898
Coro2b	0.222108	2.50623	1.32379	0.249913	0.0718529	2.50623	0.137849	0.710429	-0.0746182	0.0311974	0.280315	0.730441
Cox14	-0.124433	5.86801	2.64874	0.103632	-0.0671028	5.86801	0.770359	0.380106	0.0428398	0.010215	0.126028	0.414746
Cox17	-0.0258299	2.49072	0.013857	0.906293	-0.157319	2.49072	0.536716	0.463797	0.0105444	-0.0392612	0.913101	0.496266
Cox18	-0.73494	3.76456	23.3916	1.32153e-06	0.107362	3.76456	0.4998	0.479588	0.245051	0.0455103	2.65769e-06	0.511388
Cox19	0.30994	7.63536	23.2762	1.40328e-06	-0.0259814	7.63536	0.163841	0.685645	-0.107005	0.0106948	2.65769e-06	0.707053
Cox7a2	-7.24217	5.85547	1011.38	6.02551e-222	0.0687502	5.85547	0.0821195	0.774445	0.987687	0.0015174	0	0.790061
Cox7a2l	8.01317	5.12884	1640.72	0	-0.213961	5.12884	0.290461	0.589925	-0.993557	-0.00191779	0	0.617273
Cox8a	8.29504	8.57735	1071.34	5.59853e-235	0.0168374	8.57735	0.00576562	0.939473	-0.993317	0.00117554	0	0.944183
Cpd	-0.627067	5.67711	58.5257	2.0065e-14	-0.0497385	5.67711	0.368599	0.543769	0.213761	0.0230113	0	0.572954
Cpeb3	3.92972	4.31357	120.445	5.05383e-28	-0.00500177	4.31357	0.000216022	0.988273	-0.854978	-0.0728752	0	0.989218
Cpeb4	0.0811023	5.58992	0.690332	0.406051	0.0495221	5.58992	0.257579	0.611788	-0.0247824	0.00491216	0.437677	0.638158
Cped1	0.0281733	6.74576	0.199876	0.654821	-0.00436687	6.74576	0.00479884	0.944772	-0.00950555	0.0058069	0.676678	0.949283
Cpm	-2.74631	3.24657	81.2699	1.96904e-19	0.0889824	3.24657	0.0892066	0.765188	0.71263	0.0302587	0	0.781447
Cpn2	0.101092	7.82211	5.20935	0.0224658	0.00183096	7.82211	0.00170905	0.967024	-0.0350176	-0.0164307	0.0314432	0.969774
Cpne1	-0.275172	7.15993	21.051	4.47227e-06	0.0770338	7.15993	1.65052	0.198888	0.0965933	0.0300153	7.97308e-06	0.230693
Cpne8	0.449395	2.69323	4.58426	0.0322669	0.114988	2.69323	0.299548	0.584166	-0.147209	0.089977	0.0433523	0.611862
Cpox	-0.808917	8.99057	293.479	8.68066e-66	-0.0171487	8.99057	0.133112	0.715227	0.273352	0.022172	0	0.734924
Cps1	-0.203762	11.9228	28.7742	8.13256e-08	-0.0156775	11.9228	0.170476	0.679689	0.0708386	0.00264982	0	0.701727
Cpsf1	-0.106608	3.56549	0.329164	0.566152	-0.214681	3.56549	1.33254	0.248354	0.031385	-0.0984002	0.59308	0.281732
Cpsf3	-0.030604	4.62956	0.0574488	0.810575	-0.0591142	4.62956	0.214386	0.643351	0.00908134	-0.0668262	0.823279	0.667286
Cpsf3l	0.32565	7.04788	26.757	2.30715e-07	0.0604805	7.04788	0.923688	0.336509	-0.111805	0.0268122	0	0.371572
Cpsf4	0.047474	4.75947	0.315937	0.57406	-0.0182472	4.75947	0.046664	0.828973	-0.0159096	-0.0184029	0.600434	0.841176
Cpsf4l	-0.326288	2.30341	2.24975	0.133636	0.148132	2.30341	0.453843	0.500515	0.115602	0.0572464	0.159116	0.531627
Cpsf6	-0.185498	6.84906	8.71289	0.00315967	0.0192879	6.84906	0.0942612	0.758828	0.0658422	0.021292	0.00483435	0.775614
Cradd	1.05156	3.74226	51.8817	5.89458e-13	0.13999	3.74226	0.919703	0.337553	-0.34659	0.00971715	0	0.372534
Cramp1l	-0.0136393	4.9805	0.0212504	0.884099	0.00374877	4.9805	0.00159869	0.968106	0.00533289	-0.0157214	0.892353	0.970776
Crbn	-0.0567589	3.78503	0.142907	0.705408	0.100577	3.78503	0.449662	0.502495	0.0121813	-0.0012263	0.724751	0.53354
Creb3	0.401729	6.72078	40.2154	2.27444e-10	-0.083425	6.72078	1.73597	0.187651	-0.137386	-0.0121016	0	0.218856
Creb3l2	0.178103	3.9122	1.38254	0.239669	0.201262	3.9122	1.76351	0.184187	-0.0613032	0.0980227	0.269931	0.215186
Crebbp	-0.284489	4.50737	4.68378	0.0304486	-0.0127424	4.50737	0.00930055	0.923172	0.101133	-0.0131969	0.0411677	0.929114
Crebl2	-0.16452	7.77633	12.7861	0.000349205	-0.029266	7.77633	0.404672	0.524686	0.0576185	0.0120772	0.000595324	0.554969
Crebrf	-0.0834942	6.27742	1.60273	0.205517	-0.0612932	6.27742	0.86368	0.352711	0.0300826	-0.0274284	0.234991	0.387423
Crebzf	0.362769	3.57468	6.85853	0.00882189	0.214935	3.57468	2.40577	0.120888	-0.12504	0.0552872	0.012834	0.146503
Creg1	0.372568	9.20408	71.3156	3.04413e-17	-0.00286495	9.20408	0.00423093	0.948138	-0.127859	0.000793325	0	0.952414
Crim1	-0.486804	6.34392	69.0006	9.84331e-17	-0.0179155	6.34392	0.0933703	0.759935	0.166854	-0.0124412	0	0.776655
Crk	-0.079029	5.89293	1.43561	0.230852	0.0249347	5.89293	0.142945	0.705371	0.0265199	-0.00737254	0.260943	0.725734
Crlf3	0.0917496	4.38319	0.631907	0.426657	-0.00232168	4.38319	0.000401364	0.984016	-0.0310623	0.0411104	0.458125	0.985268
Crnkl1	-0.247257	5.98068	7.73398	0.00541913	-0.0911138	5.98068	1.05069	0.305347	0.0831461	0.0124856	0.00804218	0.340246
Crot	-1.03766	9.94972	572.738	1.42477e-126	0.0172928	9.94972	0.161882	0.68743	0.344629	-0.000859017	0	0.708773
Crtc3	-0.0752589	4.30849	0.319489	0.571915	-0.032087	4.30849	0.0577574	0.810076	0.022662	0.0491129	0.598473	0.823561
Crybg3	-0.0922825	5.08086	1.42865	0.231985	-0.0402624	5.08086	0.271807	0.602122	0.0328216	0.0125186	0.262142	0.628821
Cs	0.306709	8.06198	45.6405	1.42072e-11	-0.0197407	8.06198	0.189294	0.663505	-0.105774	-0.00980121	0	0.686323
Csde1	-0.0170234	4.3473	0.0208149	0.885284	-0.0528167	4.3473	0.201145	0.653798	0.00775221	-0.0281804	0.89344	0.677045
Csf1r	0.000378332	6.72463	3.47302e-05	0.995298	0.116071	6.72463	3.34955	0.0672235	0.000553823	-0.0267631	0.995615	0.0855113
Csgalnact2	-0.177581	3.61109	1.47878	0.223966	0.113298	3.61109	0.602131	0.437766	0.0592326	0.0857049	0.254038	0.471411
Csnk1a1	0.144125	8.94588	11.1646	0.000833731	0.0129416	8.94588	0.0900486	0.764115	-0.0493425	0.00413193	0.00134479	0.780424
Csnk1d	-0.0333512	5.84383	0.199247	0.65533	-0.0044356	5.84383	0.00352651	0.952646	0.0119029	-0.027278	0.677167	0.956422
Csnk1g1	0.444867	2.33623	4.6522	0.0310138	-0.0862505	2.33623	0.172643	0.677773	-0.154541	-0.0588536	0.0418348	0.699859
Csnk1g3	9.34192	5.06559	1626.39	0	-0.124348	5.06559	0.160112	0.689053	-0.996988	-0.0021732	0	0.710295
Csnk2a1	-1.30356	3.75671	104.359	1.68823e-24	-0.0209067	3.75671	0.0269166	0.869682	0.427194	0.0570657	0	0.879569
Csnk2b	0.281445	7.84788	19.7897	8.64452e-06	-0.0035735	7.84788	0.00319063	0.954955	-0.0958272	0.0191626	7.97308e-06	0.958585
Cspp1	-0.330316	4.87528	10.6574	0.00109634	0.177933	4.87528	3.09234	0.0786615	0.11448	-0.0252785	0.00177002	0.0985473
Csrnp1	-0.257347	5.95241	9.58429	0.00196249	0.00807841	5.95241	0.00947124	0.922472	0.0872066	-0.0387268	0.00309356	0.928458
Csrp1	-0.401979	5.95271	34.901	3.46909e-09	0.0456101	5.95271	0.449618	0.502516	0.137619	2.05226e-05	0	0.533553
Csrp2	0.870025	6.73666	55.5783	8.98095e-14	-0.00820936	6.73666	0.00498543	0.94371	-0.286188	0.0101683	0	0.948196
Csrp2bp	0.0102911	4.69275	0.0117459	0.913695	-0.0933513	4.69275	0.968744	0.324994	-0.00108549	-0.0117075	0.920014	0.360017
Cst3	1.25444	7.79147	588.819	4.52669e-130	-0.0166585	7.79147	0.105407	0.745435	-0.408557	0.00153167	0	0.763202
Cstf3	0.14997	3.49918	0.585504	0.444163	-0.421502	3.49918	4.6209	0.0315847	-0.0585876	-0.0424628	0.475121	0.0426719
CT030159.1	0.628476	4.39242	38.0389	6.93466e-10	0.0145445	4.39242	0.0203548	0.886551	-0.216997	-0.0166735	0	0.895321
CT030702.1	0.228784	3.19859	2.28422	0.130696	-0.115053	3.19859	0.577284	0.447379	-0.0691811	-0.0446132	0.155895	0.480652
Ctage5	0.222313	8.77029	19.0505	1.27304e-05	0.0156342	8.77029	0.094279	0.758806	-0.0765269	-0.0119822	1.86039e-05	0.77559
Ctc1	0.199564	5.00213	2.76301	0.0964665	-0.0902277	5.00213	0.56511	0.452209	-0.0664862	-0.101236	0.11814	0.485295
Ctdnep1	-0.0526462	5.16857	0.264534	0.607022	-0.110764	5.16857	1.17179	0.279034	0.0157857	0.00609283	0.631144	0.312819
Ctdp1	0.0287499	5.00179	0.0648505	0.798988	0.0352791	5.00179	0.0976714	0.754642	-0.0100378	0.0406994	0.812311	0.771808
Ctdsp1	0.110247	7.38621	4.57362	0.0324678	0.0168532	7.38621	0.106893	0.74371	-0.0377588	0.00358979	0.0435729	0.761621
Ctdsp2	0.367168	6.31288	26.5561	2.55994e-07	-0.029942	6.31288	0.176866	0.674081	-0.124772	-0.0346555	0	0.696356
Ctdspl2	-0.128096	4.3501	1.51489	0.218394	0.139964	4.3501	1.80962	0.178554	0.0415784	0.0196499	0.248346	0.209081
Ctgf	0.328887	4.6949	17.099	3.54805e-05	-0.0770882	4.6949	0.938988	0.332538	-0.110676	-0.0332658	6.37847e-05	0.367599
Ctif	-0.0155999	5.60922	0.0304814	0.861402	0.0457342	5.60922	0.261658	0.608983	0.0088726	-0.0161079	0.870964	0.635511
Ctla2a	-0.0521495	3.58773	0.0929064	0.760514	0.197139	3.58773	1.32192	0.250248	0.0182167	-0.0396061	0.776549	0.283616
Ctla2b	2.84594	3.21509	201.584	9.42322e-46	-0.335837	3.21509	2.55661	0.109834	-0.742895	-0.00323749	0	0.134171
Ctnna1	0.0651341	5.9174	0.993691	0.318842	-0.0165631	5.9174	0.0642675	0.799874	-0.0219995	0.0233512	0.350654	0.814232
Ctnnbip1	0.121165	3.71401	0.575676	0.448012	0.0502563	3.71401	0.099485	0.752448	-0.0435411	-0.0561178	0.47885	0.769743
Ctnnd1	0.047459	6.57496	0.573464	0.448886	0.0415474	6.57496	0.43947	0.507378	-0.0171023	-0.0190665	0.479695	0.538194
Ctr9	0.321764	5.61409	17.4383	2.96783e-05	-0.0182754	5.61409	0.056265	0.8125	-0.110613	-0.0125315	5.84693e-05	0.825916
Ctsc	1.76594	5.06364	189.521	4.0439e-43	0.182545	5.06364	2.04906	0.152301	-0.526135	0.0618835	0	0.18059
Ctsd	0.135629	9.26997	11.9852	0.000536257	0.0186573	9.26997	0.226842	0.633875	-0.0468427	-0.0104595	0.000903616	0.658691
Ctsf	-0.282911	6.838	20.366	6.39555e-06	0.00865806	6.838	0.0190589	0.890198	0.0974326	-0.0239865	7.97308e-06	0.898803
Ctsh	-0.0383968	9.32975	0.691357	0.405703	0.0319235	9.32975	0.477867	0.48939	0.0139583	0.0321554	0.437371	0.520879
Ctso	0.0215204	5.07743	0.0797319	0.777661	-0.116	5.07743	2.31768	0.127911	-0.00926697	-0.0248183	0.792516	0.154183
Cttn	0.0168772	7.2916	0.0938053	0.759394	0.100497	7.2916	3.32559	0.0682097	-0.00619559	-0.0191829	0.775534	0.0865903
Ctu1	0.0774683	3.05164	0.182664	0.669094	0.190062	3.05164	1.09837	0.294623	-0.0366334	-0.0735804	0.690155	0.329182
Ctu2	0.0547963	5.55061	0.359388	0.548846	-0.0419621	5.55061	0.21072	0.646204	-0.0204222	-0.0317114	0.576595	0.669973
Cul4a	-0.091571	8.79086	4.52671	0.0333697	6.53977e-05	8.79086	2.31444e-06	0.998786	0.0322262	-0.00591175	0.044628	0.998777
Cul9	0.1129	2.80718	0.335607	0.562376	0.289236	2.80718	2.20623	0.137454	-0.045958	0.036314	0.589487	0.164474
Cuta	-0.126048	6.30961	4.07104	0.0436245	-0.00271953	6.30961	0.00189365	0.96529	0.0421631	0.00695934	0.0572839	0.968179
Cux1	-0.885181	4.7556	57.3741	3.60315e-14	-0.00943132	4.7556	0.00654338	0.935529	0.295249	-0.000207429	0	0.940401
Cwc27	-0.286829	2.32973	0.930072	0.334844	-0.253819	2.32973	0.732953	0.391928	0.072249	0.101612	0.366714	0.426238
Cx3cr1	-0.480772	3.48273	11.9626	0.000542785	0.194343	3.48273	1.95242	0.162326	0.163506	0.0522811	0.000911589	0.191638
Cxadr	6.56372	3.40132	434.435	1.76079e-96	-0.599281	3.40132	2.1684	0.140873	-0.982606	-0.00830262	0	0.168251
Cxcl10	0.586558	4.29625	22.9119	1.696e-06	-0.080755	4.29625	0.432578	0.510727	-0.204619	-0.0428069	2.65769e-06	0.541306
Cxcl11	-0.0318088	2.71975	0.030519	0.861318	0.230471	2.71975	1.59935	0.205995	0.033145	0.0547794	0.870889	0.238273
Cxcl16	0.51693	5.9844	39.6868	2.98127e-10	0.140204	5.9844	2.92307	0.0873218	-0.17628	0.0306911	0	0.108583
Cxcl9	0.0946691	6.39888	1.60209	0.205608	0.0035444	6.39888	0.00225969	0.962086	-0.0359675	0.0149993	0.235065	0.96524
Cxcr6	0.655538	3.67225	19.9427	7.97968e-06	0.0204064	3.67225	0.0195281	0.888863	-0.22253	-0.0471904	7.97308e-06	0.897567
Cxxc1	-0.00847661	4.20749	0.00382663	0.950675	-0.0454974	4.20749	0.109282	0.740963	0.00306996	-0.0163626	0.954272	0.758907
Cxxc5	0.0393067	4.51958	0.110086	0.740046	-0.139623	4.51958	1.38928	0.238527	-0.010292	0.0500763	0.75739	0.271805
Cyb5b	0.113332	7.51397	5.19951	0.0225933	-0.0101597	7.51397	0.0418094	0.837984	-0.0395081	-0.0138354	0.0315787	0.849575
Cyb5d1	0.0156506	4.61561	0.029326	0.864028	-0.0598326	4.61561	0.427944	0.512999	-0.00413258	-0.0144144	0.873507	0.543647
Cyb5r3	1.28431	6.84224	459.325	6.74335e-102	-0.0100462	6.84224	0.0286194	0.865661	-0.41777	0.00904262	0	0.875825
Cyb5r4	-0.126333	7.41428	5.29256	0.0214167	-0.0266419	7.41428	0.235412	0.62754	0.0445173	0.0108585	0.0300399	0.652796
Cyb5rl	-0.104946	3.06693	0.192266	0.661038	-0.105078	3.06693	0.188149	0.664462	0.0465607	-0.000901621	0.682472	0.687293
Cyba	0.0722244	5.65403	0.628778	0.427804	0.0317802	5.65403	0.121813	0.727076	-0.0230701	-0.00992756	0.459351	0.74615
Cyfip1	-0.239344	7.51219	20.8692	4.91729e-06	-0.0456423	7.51219	0.759268	0.383558	0.082488	-0.00096014	7.97308e-06	0.418066
Cygb	-0.114061	4.22546	1.03482	0.309029	-0.029417	4.22546	0.0687897	0.793107	0.0398279	0.0202363	0.340408	0.807671
Cyhr1	0.228064	4.83214	5.59522	0.0180096	-0.120036	4.83214	1.54973	0.213175	-0.0800154	-0.0548555	0.025583	0.245603
Cyp1a2	0.587693	5.78806	50.9272	9.58581e-13	-0.0650887	5.78806	0.625703	0.428936	-0.201763	0.0537952	0	0.462558
Cyp20a1	-0.109938	4.10174	0.678788	0.410005	0.0581602	4.10174	0.189658	0.663201	0.0384134	-0.0479523	0.441701	0.686065
Cyp21a1	0.0871647	5.18813	0.260679	0.609654	-0.110897	5.18813	0.418685	0.517594	-0.0350544	0.0751988	0.633485	0.548155
Cyp21a2-ps	-0.232747	4.23696	1.45363	0.227947	0.0254056	4.23696	0.0174073	0.895034	0.0742902	-0.0519369	0.258102	0.903207
Cyp27a1	-0.0154111	9.45828	0.1498	0.698727	0.0171471	9.45828	0.185444	0.666736	0.00575033	-0.00541803	0.718375	0.689417
Cyp2a12	1.84265	10.5908	1512.01	0	0.0159167	10.5908	0.119362	0.729728	-0.563081	0.00921812	0	0.748553
Cyp2a22	-0.70964	8.1218	62.6542	2.46383e-15	0.0734302	8.1218	0.677515	0.410444	0.218457	-0.0180234	0	0.444622
Cyp2a5	1.58705	8.36141	14.9844	0.000108403	0.351054	8.36141	0.740252	0.38958	-0.41178	-0.0205758	0.0002073	0.423931
Cyp2c29	-10.6986	9.92467	441.129	6.14763e-98	0.324187	9.92467	0.676326	0.410855	0.998437	0.00016513	0	0.445103
Cyp2c37	-3.81455	6.19923	74.3668	6.48717e-18	0.290104	6.19923	0.482151	0.48745	0.794319	-0.00657789	0	0.519026
Cyp2c38	7.45615	5.94819	162.526	3.17448e-37	-0.036245	5.94819	0.00620414	0.937218	-0.977914	0.0091326	0	0.942006
Cyp2c50	5.74256	8.83897	346.855	2.05111e-77	0.237135	8.83897	0.818387	0.365652	-0.952827	0.015016	0	0.400432
Cyp2c54	5.48307	7.28415	160.083	1.08496e-36	0.32277	7.28415	0.73239	0.39211	-0.928082	0.0434325	0	0.4264
Cyp2d10	-1.44272	11.4091	1115.47	1.43521e-244	0.0245806	11.4091	0.335992	0.562152	0.461749	0.00809545	0	0.590524
Cyp2d11	-1.12394	5.62673	36.8375	1.28394e-09	-0.0765112	5.62673	0.172132	0.678224	0.362401	-0.0511603	0	0.700255
Cyp2d12	1.32625	5.72556	6.45087	0.0110898	0.369121	5.72556	0.504119	0.477696	-0.325742	0.144292	0.0160923	0.509557
Cyp2d22	-0.958652	8.51943	248.87	4.57903e-56	-0.0106745	8.51943	0.0312415	0.859703	0.319578	-0.0205193	0	0.87036
Cyp2d26	0.406336	9.25344	74.9944	4.72062e-18	-0.059172	9.25344	1.59446	0.20669	-0.139099	0.00541284	0	0.239091
Cyp2d34	0.805714	3.58088	7.52357	0.00608968	-0.106745	3.58088	0.131327	0.71706	-0.248809	-0.0495532	0.00909197	0.736657
Cyp2d37-ps	0.703871	4.59562	17.499	2.87455e-05	-0.135614	4.59562	0.652371	0.419266	-0.22807	0.0498115	5.58116e-05	0.453262
Cyp2d40	1.35371	8.75464	353.165	8.66925e-79	-0.0277681	8.75464	0.152947	0.695735	-0.435092	0.00198283	0	0.716602
Cyp2d9	-2.92762	9.78094	104.885	1.29449e-24	0.16299	9.78094	0.360788	0.548069	0.738598	0.0600145	0	0.577068
Cyp2f2	-0.359495	11.4338	8.25972	0.00405343	0.0862708	11.4338	0.47668	0.48993	0.120951	-0.0125455	0.00612333	0.521389
Cyp2g1	1.88453	4.4602	22.9345	1.67617e-06	0.643465	4.4602	2.73162	0.0983796	-0.524087	0.045919	2.65769e-06	0.121239
Cyp2j5	-0.00885782	9.31433	0.040912	0.839708	-0.0159424	9.31433	0.13252	0.715833	0.00361571	-0.000841556	0.850595	0.735514
Cyp2j6	-0.00941537	6.38784	0.0195032	0.888934	-0.107387	6.38784	2.54028	0.110975	0.00199239	-0.0217342	0.896796	0.135452
Cyp2j9	0.254584	3.73009	2.31615	0.128036	-0.0102834	3.73009	0.00369702	0.951516	-0.0853934	0.0091378	0.153022	0.955417
Cyp3a13	-0.216383	7.18923	16.4537	4.98524e-05	-0.00473658	7.18923	0.00789792	0.929185	0.0760824	-0.0189448	8.23885e-05	0.934533
Cyp3a41a	-3.2444	11.8063	409.048	5.90649e-91	-0.370343	11.8063	5.97318	0.0145251	0.825256	0.0274548	0	0.0209426
Cyp3a41b	-3.32045	12.0567	27.0149	2.01889e-07	-1.23559	12.0567	4.10819	0.042676	0.698907	0.0455388	0	0.0562634
Cyp3a44	-4.31999	11.8994	419.625	2.94547e-93	-1.5537	11.8994	62.7538	2.3423e-15	0.84305	-0.0593226	0	0
Cyp46a1	0.40642	2.63816	3.08909	0.0788187	-0.16577	2.63816	0.509603	0.475311	-0.14242	-0.0451818	0.0981912	0.507261
Cyp4a10	-0.250548	3.61559	0.94619	0.330691	0.282321	3.61559	1.20147	0.273027	0.0956671	0.0787485	0.362533	0.306833
Cyp4a14	1.34571	5.70151	18.9625	1.33314e-05	-0.0126525	5.70151	0.00164516	0.967646	-0.417	-0.00063683	2.39192e-05	0.970316
Cyp4a32	1.90043	7.7581	102.321	4.72046e-24	0.0961424	7.7581	0.276622	0.598924	-0.555873	-0.00338604	0	0.625754
Cyp4b1	-0.113201	4.0961	0.744621	0.388185	0.232498	4.0961	3.14722	0.0760563	0.0373566	0.0863184	0.42012	0.0956212
Cyp4f15	-0.2798	9.61113	34.1729	5.04261e-09	-0.0178371	9.61113	0.139054	0.709223	0.0968542	-0.0139055	0	0.729316
Cyp4f16	0.121242	3.79055	0.465792	0.49493	-0.175142	3.79055	0.973876	0.323715	-0.0351129	-0.0762823	0.524879	0.358754
Cyp4f17	-0.687707	4.68371	38.7166	4.90014e-10	-0.0639996	4.68371	0.334877	0.562801	0.234959	0.00717864	0	0.591185
Cyp51	0.0564003	6.77735	0.976473	0.323071	0.0921792	6.77735	2.60769	0.106347	-0.0206344	0.0126641	0.354786	0.130174
Cyp7a1	-0.371106	9.42569	61.1103	5.39658e-15	0.0382835	9.42569	0.651206	0.419682	0.129365	0.00912877	0	0.453727
Cyp7b1	-0.241548	8.83709	6.9065	0.00858829	0.126108	8.83709	1.88173	0.170137	0.088153	-0.00181837	0.0125496	0.200085
Cyyr1	0.183981	3.34917	1.42215	0.233049	0.0856308	3.34917	0.308262	0.578748	-0.0595324	0.095192	0.263191	0.606603
D030028A08Rik	0.552351	4.88935	42.3114	7.78368e-11	0.0366616	4.88935	0.185995	0.666271	-0.187622	-0.00411102	0	0.688975
D030056L22Rik	-0.288491	2.27008	2.24163	0.134339	-0.293518	2.27008	2.32186	0.127567	0.106001	-0.000974117	0.159892	0.153793
D10Wsu102e	0.372621	3.2504	4.47272	0.03444	-0.0822698	3.2504	0.217485	0.640963	-0.133991	0.0265247	0.0458718	0.665045
D11Wsu47e	-0.230386	4.07768	2.54728	0.110484	-0.213726	4.07768	2.19292	0.138646	0.0758089	-0.0452816	0.133592	0.165787
D130043K22Rik	-0.36348	5.83182	12.1844	0.000481912	-0.0254171	5.83182	0.059961	0.806558	0.124206	-0.0541345	0.000807939	0.820441
D15Ertd621e	-0.0776351	4.36718	0.346558	0.556068	0.0877024	4.36718	0.442348	0.505992	0.0269954	0.0155121	0.583444	0.536923
D17H6S53E	0.278669	5.45471	7.43663	0.00639093	-0.0457713	5.45471	0.20084	0.654044	-0.0925257	0.0279066	0.00953315	0.677274
D17H6S56E-5	-2.04606	2.56613	92.6087	6.37275e-22	0.215933	2.56613	0.99911	0.317526	0.602369	-0.0173649	0	0.352663
D17Wsu92e	0.0490379	9.97403	1.62061	0.203006	-0.00379636	9.97403	0.00971347	0.92149	-0.016599	0.00652617	0.23237	0.927626
D1Ertd622e	0.447718	4.2685	11.1765	0.000828386	-0.0871318	4.2685	0.423511	0.51519	-0.149657	-0.0387856	0.00132885	0.545819
D2hgdh	4.79871	3.9109	606.366	6.90315e-134	-0.228724	3.9109	0.947618	0.330326	-0.933901	-0.00746207	0	0.365289
D330041H03Rik	-3.37343	5.43759	198.732	3.94976e-45	0.152945	5.43759	0.458227	0.498454	0.80229	-0.0273948	0	0.529729
D4Wsu53e	0.000963235	5.95703	0.000173875	0.989479	0.0415179	5.95703	0.322821	0.569917	-0.00118488	0.00935569	0.990193	0.598048
D5Ertd579e	-8.42541	2.93418	432.938	3.72697e-96	-0.0693516	2.93418	-5.78882e-11	1	1	0	0	1
D630037F22Rik	-0.0578334	5.10713	0.47302	0.491601	-0.0300144	5.10713	0.127417	0.721126	0.0245376	0.0571021	0.521774	0.740468
D630045J12Rik	0.472746	4.0449	12.1026	0.000503528	-0.125672	4.0449	0.85521	0.355083	-0.161042	-0.0286999	0.000855778	0.389674
D6Wsu163e	0.0916193	3.0569	0.171552	0.678736	-0.0967005	3.0569	0.191143	0.661967	-0.0239002	0.0419956	0.699484	0.684795
D730039F16Rik	-0.458356	7.40864	84.6756	3.51554e-20	0.00909968	7.40864	0.0334037	0.854981	0.158148	-0.0166494	0	0.865938
D8Ertd738e	0.301918	7.61694	28.1769	1.10716e-07	-0.0614888	7.61694	1.16989	0.279424	-0.103731	-0.0146771	0	0.313215
D930015E06Rik	0.608637	5.19823	50.6242	1.11858e-12	0.0246429	5.19823	0.0831454	0.773079	-0.207757	-0.0396572	0	0.7887
Daam1	0.0232697	6.27997	0.120558	0.72843	-0.0945591	6.27997	1.99205	0.158126	-0.00671737	-0.0379025	0.746366	0.187099
Dak	-0.124819	7.35621	5.56973	0.0182736	-0.0241416	7.35621	0.208414	0.648013	0.0439944	-0.0116043	0.0259364	0.671698
Dap	0.252452	7.95504	33.1667	8.45883e-09	-0.00506879	7.95504	0.0133849	0.907896	-0.0865361	0.0108013	0	0.914797
Dapk1	-0.00492908	8.14505	0.0124413	0.911188	0.0089392	8.14505	0.040887	0.839756	0.00275428	-0.00929855	0.917758	0.851294
Darc	0.0376042	2.63069	0.0579895	0.809702	0.204315	2.63069	1.72888	0.188554	-0.00495977	0.0288485	0.822477	0.219754
Dars	-0.170568	6.30928	5.08922	0.0240751	0.0548859	6.30928	0.526815	0.467949	0.060846	0.0260433	0.0334152	0.500335
Dars2	-0.272411	4.8351	6.88702	0.00868238	-0.000120361	4.8351	1.65838e-06	0.998972	0.0970471	-0.00930361	0.01264	0.998963
Daxx	-0.495445	3.83511	10.5692	0.00114988	-0.111589	3.83511	0.536793	0.463765	0.173584	0.0466106	0.00186039	0.496245
Dazap2	-0.126624	6.45146	2.67143	0.102164	-0.0118205	6.45146	0.023279	0.878734	0.0441556	0.0150463	0.124468	0.887819
Dbf4	0.0117784	3.27251	0.00381247	0.950766	0.0773795	3.27251	0.168375	0.68156	0.00580838	0.108733	0.954346	0.703396
Dbnl	-0.242939	4.75607	5.27268	0.0216626	0.0909807	4.75607	0.739715	0.389752	0.0865869	0.0666126	0.0303323	0.424056
Dbt	0.0631895	6.52458	0.774936	0.378694	0.0075261	6.52458	0.0109913	0.916503	-0.0213871	-0.0104748	0.410845	0.922911
Dcaf11	0.209953	9.0886	24.804	6.34654e-07	0.00676094	9.0886	0.0257377	0.872543	-0.0720084	0.00327588	0	0.882158
Dcaf12	-0.22857	3.30303	1.82416	0.176819	0.101519	3.30303	0.360108	0.548446	0.0783249	-0.0252394	0.204906	0.577429
Dcaf13	0.0685803	4.18281	0.16647	0.683268	-0.226651	4.18281	1.8254	0.176672	-0.020051	0.036647	0.703718	0.20704
Dcaf15	-0.248599	4.03786	3.57802	0.0585489	0.0647635	4.03786	0.242647	0.622301	0.0847569	-0.0376863	0.0750241	0.647906
Dcaf4	-0.025173	3.094	0.0218806	0.882405	0.00794439	3.094	0.00219906	0.962598	0.0112293	0.018925	0.890769	0.965748
Dcaf5	0.440602	5.0091	28.2364	1.07367e-07	0.0360893	5.0091	0.189096	0.66367	-0.151258	-0.0209299	0	0.686461
Dcaf7	-0.14578	3.31153	0.793506	0.373042	-0.0595998	3.31153	0.132911	0.715433	0.046374	-0.082924	0.40511	0.735145
Dcbld1	-0.964476	3.91131	47.1391	6.61247e-12	0.0276878	3.91131	0.0394148	0.842629	0.322673	-0.0397606	0	0.854191
Dcbld2	0.653132	4.54995	39.5095	3.26461e-10	-0.134591	4.54995	1.67611	0.195442	-0.220913	0.0107625	0	0.226999
Dcdc2a	-0.872019	3.17988	21.4376	3.65535e-06	0.0664331	3.17988	0.12101	0.727942	0.290857	0.0232905	5.31539e-06	0.746857
Dcdc2b	0.794351	2.87359	17.7274	2.54929e-05	0.100068	2.87359	0.270368	0.603085	-0.279844	-0.0012493	4.78385e-05	0.62977
Dchs1	-0.132625	4.30839	1.46949	0.225427	0.0306015	4.30839	0.0783144	0.779595	0.043761	0.0289213	0.255505	0.794996
Dck	0.0209226	3.47508	0.0179192	0.893511	-0.0772263	3.47508	0.241613	0.623044	-0.00658299	0.0294836	0.901073	0.648594
Dclre1a	0.744875	4.92169	43.9102	3.4379e-11	-0.183286	4.92169	2.65973	0.102918	-0.251428	-0.058965	0	0.126395
Dclre1b	-0.159145	2.43349	0.872322	0.350313	-0.0552512	2.43349	0.104819	0.746122	0.0503259	0.00100781	0.382421	0.763837
Dclre1c	-0.480188	4.11122	14.8054	0.000119192	-0.0400013	4.11122	0.10256	0.748779	0.1605	0.0146872	0.000225904	0.766245
Dcp2	0.0658246	6.48726	1.31371	0.251724	-0.0208276	6.48726	0.131528	0.716853	-0.0224636	-0.00348029	0.282194	0.736431
Dcps	0.0282747	5.55488	0.119278	0.729819	-0.0293782	5.55488	0.128864	0.719613	-0.00860032	-0.0219765	0.747588	0.739155
Dctn1	0.513375	4.9833	32.8946	9.72947e-09	0.194403	4.9833	4.71266	0.0299413	-0.172651	0.0137058	0	0.0406255
Dctn3	-1.0215	5.48067	117.801	1.91734e-27	0.0383502	5.48067	0.166465	0.683273	0.338981	0.0403587	0	0.704903
Dctn4	-0.182821	4.64157	4.62349	0.031537	0.100912	4.64157	1.40821	0.235355	0.0607768	0.00658883	0.0424274	0.268595
Dcun1d2	0.238586	6.09768	10.0062	0.00156016	0.067413	6.09768	0.798886	0.371427	-0.0828799	-0.0559438	0.00245571	0.406356
Dcun1d4	0.202481	3.13524	1.45141	0.228302	-0.147028	3.13524	0.764724	0.381854	-0.078583	-0.0878591	0.258471	0.416479
Ddah1	-0.14157	8.70992	4.82746	0.0280099	-0.0188023	8.70992	0.0851678	0.770413	0.0494829	0.023702	0.0381831	0.786279
Ddc	-0.947853	7.77702	257.585	5.76746e-58	0.0405975	7.77702	0.477463	0.489574	0.317406	-0.00826801	0	0.521041
Ddhd1	0.457021	2.42637	6.82887	0.00896962	-0.234031	2.42637	1.78905	0.181041	-0.15489	-0.0016994	0.0129908	0.211741
Ddr1	0.259796	3.71138	0.171101	0.679135	0.218052	3.71138	0.124382	0.724329	-0.0550086	0.255168	0.699821	0.743506
Ddx11	0.189517	3.54981	1.89176	0.169003	0.16502	3.54981	1.43318	0.231246	-0.0774571	0.0267325	0.196869	0.2643
Ddx18	-0.142835	5.32322	2.73856	0.0979529	-0.1341	5.32322	2.41382	0.120268	0.0497725	0.0257074	0.119734	0.145817
Ddx21	0.367269	3.65078	6.98235	0.00823177	0.0113475	3.65078	0.00662907	0.935109	-0.125647	-0.000923487	0.0120606	0.940056
Ddx24	0.103333	4.205	0.983314	0.321382	-0.0287317	4.205	0.0760203	0.782765	-0.036684	0.00146537	0.353165	0.798095
Ddx39	0.0697418	5.13943	0.568551	0.450835	-0.0259851	5.13943	0.0789982	0.77866	-0.0221633	-0.0417204	0.481649	0.794082
Ddx39b	1.45737	7.28723	352.308	1.33228e-78	-0.0416138	7.28723	0.294539	0.587327	-0.462559	0.0322665	0	0.614812
Ddx42	-0.255239	3.57416	4.07042	0.0436405	0.022635	3.57416	0.0319394	0.858161	0.0889998	0.00155772	0.0573052	0.868896
Ddx47	0.155263	5.75204	2.77676	0.0956416	0.029811	5.75204	0.102458	0.748899	-0.0505947	0.0263254	0.117069	0.766354
Ddx5	-0.326479	5.35555	19.9234	8.06076e-06	0.13457	5.35555	3.38127	0.0659412	0.114346	0.00415267	7.97308e-06	0.0840735
Ddx55	-0.180968	3.70108	1.4401	0.230124	0.347121	3.70108	5.29881	0.02134	0.0638627	0.0495129	0.260292	0.0296413
Ddx59	-0.877892	3.13582	17.9274	2.29495e-05	-0.172966	3.13582	0.702901	0.401811	0.292045	0.0142576	4.51808e-05	0.436149
Decr1	-0.296505	9.66028	49.8176	1.68726e-12	0.0268371	9.66028	0.408708	0.522626	0.102526	-0.00969453	0	0.552986
Decr2	-0.322584	10.0605	51.1108	8.72949e-13	-0.0469924	10.0605	1.08659	0.297229	0.111559	-0.0275544	0	0.33185
Dedd	0.12778	5.74103	3.45173	0.0631857	-0.0725158	5.74103	1.11161	0.291732	-0.0444909	-0.00609956	0.0804644	0.326272
Dedd2	-0.640707	6.28582	78.2205	9.21585e-19	0.0116428	6.28582	0.0258576	0.872249	0.217951	-0.0181491	0	0.881911
Def8	-0.5453	6.91332	69.575	7.35618e-17	0.00218658	6.91332	0.00113263	0.973153	0.187094	0.00795993	0	0.975361
Degs1	0.0318494	6.842	0.381524	0.536789	-0.0176419	6.842	0.117068	0.732237	-0.0106752	0.00294946	0.56468	0.750926
Dek	-0.203206	4.64358	3.99706	0.0455798	-0.12293	4.64358	1.46289	0.22647	0.0696085	0.0163807	0.0596573	0.259386
Dennd2d	-0.036881	2.58123	0.0282019	0.866635	-0.0457122	2.58123	0.0427655	0.836167	0.0216364	0.00536093	0.876037	0.847831
Dennd4a	0.557056	4.06839	14.6512	0.000129354	0.247411	4.06839	2.89217	0.0890111	-0.182251	0.0166516	0.000239192	0.110478
Dennd4c	-0.208959	4.8631	6.83067	0.00896056	0.110968	4.8631	1.92589	0.165209	0.0716422	-0.00669001	0.0129855	0.194681
Dennd5a	0.0800098	4.6652	0.468735	0.49357	0.0578541	4.6652	0.245361	0.620361	-0.0287185	-0.00495112	0.523592	0.64603
Depdc5	0.120264	3.50825	0.479494	0.488652	0.501249	3.50825	8.31268	0.00393692	-0.041548	0.000176232	0.51896	0.00611535
[truncated: 4,314 more rows]

## Sheet: LIV_LowFat
genes	AG_logFC	AG_logCPM	AG_LR	AG_pval	PO_logFC	PO_logCPM	PO_LR	PO_pval	AGE	POE	AG_adj_pval	PO_adj_pval
[truncated: 5,394 more rows]

[truncated: 6 more sheets: LIV_Females, LIV_Males, LIV_HF, LIV_HM, LIV_LF, LIV_LM]
