# Supplementary material for: Genetic, epigenetic, and environmental mechanisms govern allele-specific gene expression
Source: HighWire-hosted journal article supplement (doi:10.1101/gr.276193.121), 2022-05-02
Supplement: Supplemental_Table_S4.xlsx [file Supplemental_Table_S4.xlsx]

## Sheet: README
Supplemental Table S4: Allele-specific expression analyses for all contexts in WAT.
Full summary statistics for all environmental context analyses in WAT. Each gene’s allelic genotype (AG) and parent-of-origin (PO) effects on ASE were jointly estimated with a generalized linear model and the magnitude of its ASE biases were quantified (see Methods). For both AG and PO terms, the tables include the log2 fold-changes, log2 counts-per-million, likelihood ratios, raw p-values, effec…
Each sheet contains a separate diet-by-sex context analysis.
WAT_ALL	All contexts collapsed in WAT
WAT_HighFat	High fat-fed diet in WAT
WAT_LowFat	Low fat-fed diet in WAT
WAT_Females	Females in WAT
WAT_Males	Males in WAT
WAT_HF	High fat-fed females in WAT
WAT_HM	High fat-fed males in WAT
WAT_LF	Low fat-fed females in WAT
WAT_LM	Low fat-fed males in WAT

## Sheet: WAT_All
genes	AG_logFC	AG_logCPM	AG_LR	AG_pval	PO_logFC	PO_logCPM	PO_LR	PO_pval	AGE	POE	AG_adj_pval	PO_adj_pval
0610009B22Rik	-0.0563631	5.79986	0.766768	0.381219	0.027823	5.79986	0.186871	0.665534	0.02177	0.00804862	0.404909	0.681411
0610009O20Rik	-0.0760838	6.83619	2.63076	0.104812	0.00229915	6.83619	0.00240558	0.960882	0.0304166	0.00138677	0.122123	0.962907
0610010K14Rik	0.331143	5.41134	19.0043	1.30423e-05	0.0348164	5.41134	0.210327	0.646511	-0.110601	0.0133632	2.67269e-05	0.66316
1100001G20Rik	0.667445	7.55763	69.6996	6.90608e-17	0.0733114	7.55763	0.846899	0.357431	-0.218899	0.0278705	0	0.38205
1110004E09Rik	0.245198	5.81435	12.0908	0.000506713	0.0240099	5.81435	0.115765	0.733674	-0.0815919	0.00628116	0.000866717	0.746266
1110008F13Rik	0.104226	8.61988	11.0717	0.000876558	0.0218539	8.61988	0.486827	0.485346	-0.0319089	0.00726995	0.00143562	0.508228
1110032A03Rik	0.297619	7.29488	36.9302	1.22438e-09	0.104001	7.29488	4.51238	0.0336504	-0.0983071	0.0349672	0	0.0426753
1110035H17Rik	0.18001	4.07716	1.53117	0.215937	-0.00777494	4.07716	0.00280506	0.957761	-0.0567349	-0.00260861	0.239206	0.960207
1110038B12Rik	-0.329389	5.15525	22.0139	2.70679e-06	-0.0376966	5.15525	0.287849	0.591602	0.118207	-0.0128713	1.14544e-05	0.610524
1110057K04Rik	-0.0097231	7.56183	0.0680821	0.79415	0.0540926	7.56183	2.10661	0.146664	0.00723929	0.0174952	0.804046	0.167666
1110059E24Rik	0.0782896	5.90359	1.63289	0.201304	0.0924999	5.90359	2.27938	0.131104	-0.0216923	0.0304828	0.223873	0.151519
1110059G10Rik	-0.0217748	4.79184	0.0684628	0.793588	0.0104587	4.79184	0.0158834	0.899709	0.0122787	0.00864628	0.803557	0.905413
1190002N15Rik	-0.189548	7.5772	17.6438	2.66387e-05	0.0514696	7.5772	1.3015	0.253939	0.066479	0.0164459	7.25446e-05	0.278812
1200014J11Rik	-0.116801	3.98345	0.95494	0.328465	0.00900314	3.98345	0.00560631	0.940314	0.0478988	0.00347788	0.352444	0.943805
1500011K16Rik	-1.28593	4.58848	172.962	1.66856e-39	-0.130384	4.58848	1.76307	0.184242	0.416085	-0.0422154	0	0.2075
1500035N22Rik	0.504189	3.17406	6.65705	0.00987644	0.0328239	3.17406	0.0324517	0.85704	-0.164086	0.0241411	0.0135353	0.864785
1600012H06Rik	-0.172948	4.16318	4.32469	0.0375632	-0.191086	4.16318	5.28199	0.0215471	0.0610352	-0.0685904	0.0470165	0.0280938
1600014C10Rik	-0.495347	7.79012	192.45	9.27827e-44	-0.0334752	7.79012	0.879786	0.34826	0.173229	-0.0122453	0	0.372734
1700006P19Rik	0.190605	5.40054	7.65907	0.00564877	-0.00279593	5.40054	0.00165158	0.967583	-0.0622333	-0.000486341	0.00809063	0.969409
1700012B15Rik	0.109713	5.29764	2.42888	0.119118	-0.115343	5.29764	2.68547	0.101267	-0.0334206	-0.0429743	0.137522	0.119202
1700020I14Rik	-0.0452723	9.02583	2.79063	0.0948172	0.00733927	9.02583	0.0733336	0.786543	0.0194252	0.00213706	0.111207	0.797543
1700020L24Rik	0.347454	5.17664	26.2304	3.0301e-07	0.034294	5.17664	0.25482	0.613701	-0.117658	0.0084909	3.81813e-06	0.632096
1700021K19Rik	0.0487027	7.73521	1.61669	0.203553	0.00989453	7.73521	0.0667193	0.796175	-0.0130105	0.0035266	0.226308	0.80686
1700022I11Rik	0.177815	8.00259	33.3	7.89838e-09	-0.00639225	8.00259	0.0430127	0.835701	-0.0582542	-0.00240436	0	0.844274
1700025G04Rik	0.26614	6.20248	22.8771	1.72698e-06	-0.0285262	6.20248	0.262886	0.608144	-0.0874693	-0.00869192	7.63627e-06	0.626762
1700028K03Rik	0.171564	3.21506	2.02672	0.154553	0.0524445	3.21506	0.189021	0.663733	-0.0539121	0.0222111	0.174573	0.679609
1700034J05Rik	0.314005	5.7055	29.5683	5.39808e-08	0.119181	5.7055	4.25799	0.0390661	-0.102458	0.0406674	0	0.0489943
1700049G17Rik	0.120583	4.73453	0.94829	0.330155	0.231654	4.73453	3.50442	0.0612052	-0.0342505	0.0780906	0.354269	0.0744498
1700066M21Rik	0.0995762	3.49498	0.724917	0.394536	0.152158	3.49498	1.69446	0.193014	-0.0270309	0.0610039	0.418112	0.216698
1700120B22Rik	0.163892	3.26185	1.72575	0.188954	0.106625	3.26185	0.731173	0.392503	-0.0527721	0.0444146	0.211021	0.416455
1700121F15Rik	-0.0691687	3.61162	0.34164	0.558884	-0.0955723	3.61162	0.653997	0.418687	0.0238288	-0.0376342	0.578844	0.442468
1700123O20Rik	-0.0534279	4.75506	0.392747	0.530859	0.00838861	4.75506	0.00971265	0.921493	0.0222174	0.00363573	0.551484	0.926138
1810024B03Rik	-1.36029	3.91788	114.67	9.29662e-27	0.0949378	3.91788	0.557218	0.455383	0.439993	0.0216271	0	0.478481
1810032O08Rik	-0.405316	4.05568	13.1449	0.000288296	0.133634	4.05568	1.42287	0.232932	0.145049	0.0395625	0.000484903	0.25756
1810037I17Rik	0.317146	8.40694	94.9445	1.95797e-22	0.0508284	8.40694	2.44067	0.118226	-0.105389	0.0172491	0	0.137877
1810058I24Rik	-0.806092	6.31799	267.578	3.82668e-60	0.0241398	6.31799	0.239018	0.624916	0.275708	0.00821908	0	0.642695
1810062O18Rik	0.00356795	2.96971	0.000383229	0.984381	0.177677	2.96971	0.985396	0.32087	0.00574527	0.0500154	0.98556	0.345243
2010012P19Rik	-0.387594	4.38894	23.0843	1.55055e-06	-0.0644202	4.38894	0.636697	0.42491	0.133245	-0.021216	7.63627e-06	0.448803
2010107G23Rik	-0.991088	3.48854	57.4144	3.53009e-14	-0.0120804	3.48854	0.00751946	0.930898	0.329957	0.00667694	0	0.934889
2210015D19Rik	-0.389211	5.20956	29.9082	4.52986e-08	0.00687627	5.20956	0.00934222	0.923	0.137144	0.0017415	0	0.927597
2210016F16Rik	-0.282152	3.92681	7.24201	0.00712171	-0.078036	3.92681	0.5548	0.456363	0.0968399	-0.028424	0.00996151	0.479359
2210018M11Rik	-0.290166	3.19603	3.42255	0.0643118	-0.297413	3.19603	3.58262	0.0583871	0.113215	-0.0893151	0.0775654	0.0711471
2210404O09Rik	0.179508	2.92332	0.982278	0.321637	-0.292204	2.92332	2.58953	0.107572	-0.0502226	-0.0932185	0.345476	0.126033
2210408I21Rik	0.297123	4.35505	4.45242	0.0348517	-0.0782656	4.35505	0.309516	0.577977	-0.0924566	-0.0231909	0.0440193	0.597527
2210411M09Rik	0.450287	3.45607	19.651	9.29543e-06	-0.119126	3.45607	1.36963	0.241876	-0.142909	-0.0412202	1.52725e-05	0.26675
2310001K24Rik	0.225491	3.26291	4.39116	0.0361258	0.015547	3.26291	0.021151	0.884368	-0.0794234	0.0101515	0.0454129	0.890668
2310014F06Rik	-0.221723	4.10276	4.53063	0.0332934	0.0630743	4.10276	0.365897	0.545249	0.0821401	0.01984	0.0422706	0.565786
2310039H08Rik	-0.303563	4.89469	13.181	0.000282804	0.0984477	4.89469	1.3851	0.239234	0.10682	0.0333074	0.000477267	0.264135
2310047M10Rik	-0.203292	4.94084	6.29353	0.012118	0.0386322	4.94084	0.226726	0.633962	0.0724932	0.00927061	0.0164256	0.651095
2310061I04Rik	-0.407993	3.69151	9.63711	0.00190685	-0.352187	3.69151	7.17068	0.00741048	0.138639	-0.110443	0.00289033	0.0102326
2310067B10Rik	-0.0730692	3.37857	0.271784	0.602137	0.0588589	3.37857	0.176674	0.674247	0.0369424	0.0265751	0.620428	0.689528
2410002F23Rik	-1.6037	6.5809	779.734	1.37481e-171	-0.0826794	6.5809	2.08749	0.14851	0.505605	-0.0225038	0	0.169674
2410004N09Rik	0.17002	4.90959	4.94604	0.0261505	-0.0225761	4.90959	0.0871859	0.767786	-0.0539745	-0.00839853	0.0337981	0.779323
2410017I17Rik	-0.19433	7.35206	2.7727	0.0958841	-0.0987268	7.35206	0.715693	0.39756	0.0668749	-0.030747	0.112314	0.421545
2410127L17Rik	-0.29749	5.18268	26.2286	3.03294e-07	-0.0159783	5.18268	0.0756482	0.783284	0.104303	-0.00536101	3.81813e-06	0.794279
2410131K14Rik	-0.847282	5.56681	205.311	1.44829e-46	0.0319149	5.56681	0.289561	0.590502	0.288985	0.00878398	0	0.609493
2510009E07Rik	-0.0237453	6.0002	0.204823	0.650855	-0.0911197	6.0002	3.01429	0.0825335	0.0129281	-0.0315496	0.667425	0.0986491
2610002J02Rik	-0.104556	5.39189	2.67265	0.102086	0.0166645	5.39189	0.0678323	0.79452	0.0401474	0.00372762	0.119137	0.805374
2610019F03Rik	0.135251	8.69122	20.1274	7.24515e-06	0.0168818	8.69122	0.313639	0.575455	-0.0428355	0.00572357	1.14544e-05	0.595007
2610044O15Rik8	0.0206871	3.99811	0.0271961	0.869013	-0.0858375	3.99811	0.461395	0.496973	-0.0112423	-0.0313383	0.876082	0.51935
2610203C22Rik	-0.769819	3.71123	35.6449	2.36769e-09	-0.00562743	3.71123	0.00218224	0.962741	0.284566	0.00282447	0	0.964743
2610206C17Rik	-0.447105	4.8533	26.5019	2.63273e-07	0.064333	4.8533	0.549026	0.458716	0.156508	0.0200677	3.81813e-06	0.481738
2610301B20Rik	-0.0614485	5.42136	0.837189	0.360202	-0.0284441	5.42136	0.179508	0.671797	0.0237803	-0.0112737	0.384013	0.687218
2610305D13Rik	2.60693	5.27104	809.152	5.52306e-178	-0.0728661	5.27104	0.624507	0.429377	-0.715107	-0.0141645	0	0.453006
2610507B11Rik	-0.271322	8.25087	76.7207	1.96927e-18	0.0276133	8.25087	0.795085	0.372567	0.0970169	0.00889881	0	0.396796
2700049A03Rik	-0.0180497	2.91412	0.00877842	0.925353	-0.0806141	2.91412	0.183199	0.668638	0.00426311	-0.0283734	0.929277	0.684248
2700060E02Rik	-0.0538075	8.36009	3.19629	0.0738056	-0.0472977	8.36009	2.46949	0.116075	0.0227751	-0.0162497	0.0882944	0.135422
2700062C07Rik	-8.16447	4.62305	1558.75	0	0.095021	4.62305	0.101053	0.75057	0.995597	0.00108448	0	0.762508
2700089E24Rik	0.315275	9.12811	167.255	2.94319e-38	0.00876377	9.12811	0.12934	0.719117	-0.105075	0.00286181	0	0.732333
2700097O09Rik	0.281646	3.40589	3.79579	0.0513817	0.121185	3.40589	0.700733	0.402537	-0.0937223	0.0401609	0.063171	0.426554
2810006K23Rik	-0.0806761	2.95861	0.238466	0.625316	0.0935586	2.95861	0.3185	0.57251	0.045118	0.0400919	0.643066	0.592174
2810021J22Rik	-0.0225211	3.36158	0.028973	0.864842	-0.0634719	3.36158	0.228741	0.632459	0.0182611	-0.0227955	0.871944	0.649755
2810025M15Rik	-2.34171	5.98155	786.337	5.04373e-173	-0.0170406	5.98155	0.041766	0.838066	0.669064	-0.00345527	0	0.846568
2810032G03Rik	-2.06729	4.0447	202.294	6.59539e-46	-0.122266	4.0447	0.708842	0.399828	0.612387	-0.0280481	0	0.423847
2810055G20Rik	0.122794	5.26573	1.88783	0.169446	-0.0276851	5.26573	0.0959252	0.756775	-0.0361645	-0.0111806	0.190506	0.768533
2810403A07Rik	-0.21972	5.59327	8.55282	0.00344988	0.0257633	5.59327	0.117448	0.731819	0.0768673	0.00810299	0.00516594	0.744418
2810408M09Rik	-0.362541	3.32662	6.88171	0.00870822	0.0344047	3.32662	0.0611537	0.804682	0.138102	0.00710105	0.0120539	0.81479
2900097C17Rik	0.363327	6.7262	69.5685	7.3808e-17	-0.00853764	6.7262	0.0383072	0.844828	-0.121094	-0.00383391	0	0.85317
3110001D03Rik	-0.0556102	5.47526	0.755602	0.384708	0.0129	5.47526	0.0406528	0.84021	0.0208057	0.00225148	0.408372	0.84855
3110002H16Rik	-0.13827	6.11975	7.62075	0.00577006	-0.0157148	6.11975	0.0983702	0.753794	0.051588	-0.00529374	0.00826244	0.765666
3110040N11Rik	-0.294771	5.17936	10.9174	0.000952667	0.00147191	5.17936	0.000272261	0.986835	0.10743	0.000992014	0.00153489	0.987564
3110043O21Rik	0.10528	9.22331	14.4684	0.000142528	0.0296895	9.22331	1.15075	0.283392	-0.0328882	0.010316	0.000232906	0.307803
3110052M02Rik	-0.0212609	2.99561	0.00815665	0.928038	0.1221	2.99561	0.261141	0.609338	0.00844827	0.0358253	0.931766	0.627789
3110053B16Rik	-1.60104	3.48464	28.1579	1.11809e-07	0.0423	3.48464	0.0131187	0.908812	0.447361	0.00455441	3.81813e-06	0.914241
3110056K07Rik	-0.0923326	6.70689	4.70058	0.0301525	-0.0362064	6.70689	0.722762	0.395239	0.0371513	-0.0130019	0.0385975	0.419243
3110062M04Rik	-0.282245	2.97974	3.04192	0.08114	-0.0422186	2.97974	0.070495	0.790617	0.0965853	-0.014139	0.0965263	0.80151
3110082I17Rik	0.407465	4.73748	18.3733	1.81581e-05	0.136977	4.73748	2.07555	0.149676	-0.139303	0.0467706	4.58176e-05	0.170812
3632451O06Rik	-1.49113	4.6605	264.237	2.04659e-59	0.0670567	4.6605	0.527802	0.467532	0.466404	0.0157417	0	0.490523
4430402I18Rik	0.617516	3.58375	19.2667	1.13672e-05	0.0119209	3.58375	0.00754269	0.930792	-0.210517	0.00921613	2.67269e-05	0.934794
4632415L05Rik	0.552299	4.05674	24.8547	6.18196e-07	0.127825	4.05674	1.33411	0.248076	-0.183821	0.0518251	7.63627e-06	0.272859
4632427E13Rik	0.0308184	5.49907	0.205324	0.650458	0.00738104	5.49907	0.0117812	0.913566	-0.0079899	0.00263326	0.667062	0.918796
4632428N05Rik	-0.0540635	9.17862	4.84215	0.0277722	-0.010641	9.17862	0.187578	0.66494	0.0225322	-0.00372516	0.0357377	0.680785
4833403I15Rik	-0.890374	5.06339	142.324	8.26221e-33	-0.147601	5.06339	3.89247	0.0485031	0.30184	-0.0525478	0	0.059918
4833420G17Rik	-1.20199	7.25273	591.949	9.43805e-131	0.108415	7.25273	4.85841	0.0275116	0.396218	0.0305149	0	0.0354705
4833422C13Rik	-0.061599	3.89858	0.281093	0.595986	-0.0421221	3.89858	0.131746	0.716628	0.0266675	-0.0120972	0.614479	0.729951
4922501C03Rik	-0.338118	5.95635	26.0392	3.34556e-07	-0.0440124	5.95635	0.44137	0.506462	0.120575	-0.014454	3.81813e-06	0.528437
4930404I05Rik	0.00121659	3.98258	0.000129846	0.990908	-0.0701934	3.98258	0.446371	0.504063	0.00551177	-0.0161643	0.991738	0.526257
4930412C18Rik	0.800284	3.11803	13.6997	0.000214494	0.127056	3.11803	0.346408	0.556153	-0.24878	0.0279116	0.000335996	0.57637
4930417H01Rik	-0.437185	3.55346	12.3887	0.000431934	0.0359564	3.55346	0.0836159	0.772456	0.150263	0.0179815	0.000702537	0.783852
4930422G04Rik	-0.10371	4.547	1.71004	0.19098	-0.0798824	4.547	1.01401	0.313944	0.0382671	-0.0282641	0.213212	0.338378
4930423O20Rik	0.156655	3.70471	2.43338	0.118777	0.067796	3.70471	0.457776	0.498665	-0.0404888	0.0404386	0.137151	0.520942
4930427A07Rik	-0.360946	3.35939	5.03683	0.0248139	-0.139445	3.35939	0.753182	0.385471	0.123859	-0.0533592	0.0321411	0.409571
4930430F08Rik	0.0239321	4.0197	0.0376711	0.846105	-0.131491	4.0197	1.14059	0.285528	-0.00481594	-0.0452178	0.854098	0.310006
4930451G09Rik	1.65462	2.85888	71.6278	2.59868e-17	0.247133	2.85888	1.61716	0.203489	-0.494486	0.0619238	0	0.227526
4930474H06Rik	-0.260201	3.43621	4.96389	0.0258819	-0.377272	3.43621	10.4503	0.00122627	0.0857389	-0.132496	0.0334354	0.00201216
4930486L24Rik	0.422353	3.96165	7.28156	0.00696659	0.0199442	3.96165	0.0164794	0.897854	-0.135699	0.00914089	0.00977442	0.903691
4930503L19Rik	0.275684	4.13734	9.57177	0.00197592	-0.0305239	4.13734	0.117172	0.732122	-0.0968031	-0.00778514	0.00299342	0.744716
4930506C21Rik	0.217094	7.80362	33.4671	7.24786e-09	0.0207889	7.80362	0.307014	0.579519	-0.0711923	0.00709451	0	0.599031
4930506M07Rik	0.341575	5.62556	21.2998	3.92775e-06	-0.0374721	5.62556	0.256603	0.612463	-0.111386	-0.0123023	1.14544e-05	0.630928
4930518I15Rik	-0.622627	2.80611	20.1997	6.97629e-06	0.0148635	2.80611	0.0109	0.91685	0.214768	0.00694836	1.14544e-05	0.921778
4930523C07Rik	-0.522699	5.88635	42.7394	6.25399e-11	-0.0917862	5.88635	1.32037	0.250526	0.18143	-0.0309803	0	0.275299
4930558J22Rik	0.34706	5.63293	30.9422	2.65832e-08	0.0418765	5.63293	0.44985	0.502406	-0.115047	0.0169018	0	0.524738
4930579G18Rik	0.339684	3.76902	7.686	0.00556507	0.132543	3.76902	1.17363	0.278657	-0.111934	0.0562348	0.00799517	0.303091
4930581F22Rik	-0.161325	5.12861	3.62277	0.0569939	-0.0824764	5.12861	0.945925	0.330759	0.0613601	-0.0285084	0.0693679	0.355285
4930586N03Rik	-2.44569	2.99259	284.945	6.28214e-64	-0.043725	2.99259	0.0743129	0.785158	0.693826	-0.00664682	0	0.796131
4931406P16Rik	0.0337585	9.0524	1.63389	0.201166	-0.0225821	9.0524	0.731084	0.392532	-0.00815482	-0.00782002	0.223743	0.416501
4931414P19Rik	0.317709	3.30009	6.31606	0.0119649	0.13403	3.30009	1.1215	0.289596	-0.0941381	0.035561	0.0162385	0.31395
4931422A03Rik	-0.316279	3.9841	11.2916	0.000778595	-0.120691	3.9841	1.64482	0.199666	0.118664	-0.0491544	0.00129435	0.223613
4932438A13Rik	-0.194901	7.84407	16.5596	4.71456e-05	-0.00913002	7.84407	0.036339	0.848817	0.0706861	-0.00318097	9.92715e-05	0.857137
4932442E05Rik	0.0401001	4.57546	0.178026	0.673075	0.00850354	4.57546	0.00792953	0.929044	-0.00990447	-0.00328207	0.688879	0.933164
4932702P03Rik	-1.17939	3.73719	106.601	5.44481e-25	0.20058	3.73719	3.03898	0.0812869	0.380736	0.0601121	0	0.0972517
4933406I18Rik	-0.357883	4.60821	11.5736	0.000668958	-0.122929	4.60821	1.36259	0.24309	0.129206	-0.0387875	0.00110344	0.267983
4933421O10Rik	-0.162621	3.56807	1.61708	0.2035	0.116642	3.56807	0.831662	0.361792	0.0651372	0.0446822	0.22624	0.386456
4933426D04Rik	-0.151799	3.72919	1.08174	0.298308	0.53233	3.72919	13.2294	0.000275592	0.0655003	0.174022	0.322468	0.000461994
4933427D14Rik	0.265923	4.7528	9.80821	0.00173735	-0.0145586	4.7528	0.0294015	0.863855	-0.0867402	-0.0022779	0.00263069	0.871031
5031439G07Rik	0.227124	8.38598	57.5449	3.30352e-14	-0.0030995	8.38598	0.0107305	0.917496	-0.0750478	-0.00205992	0	0.922377
5033411D12Rik	0.124527	3.04654	0.474163	0.491078	0.116873	3.04654	0.422849	0.515519	-0.0279652	0.0463014	0.512642	0.537261
5330426P16Rik	1.21979	3.2102	77.1276	1.60265e-18	-0.0688008	3.2102	0.235271	0.627643	-0.401577	-0.0187132	0	0.6452
5330430P22Rik	0.213209	3.04928	2.32896	0.126987	-0.058069	3.04928	0.171679	0.678624	-0.0733324	-0.0247001	0.145757	0.693621
5330438D12Rik	-0.356646	3.58152	5.47921	0.019244	0.0787816	3.58152	0.270196	0.6032	0.124802	0.020833	0.0254937	0.622016
5430405H02Rik	-0.969382	4.49159	94.1467	2.92989e-22	-0.133721	4.49159	1.78758	0.181221	0.327412	-0.0443031	0	0.204049
5430416O09Rik	-0.0977323	5.02687	1.58114	0.208597	-0.0253264	5.02687	0.106013	0.74473	0.0373723	-0.0105597	0.231413	0.756876
5430417L22Rik	0.264402	5.47477	15.1164	0.00010108	-0.0116798	5.47477	0.0293639	0.863941	-0.0864271	-0.00604578	0.000175634	0.871123
5730455P16Rik	-0.260302	3.95677	5.65952	0.0173609	-0.0665082	3.95677	0.368132	0.544024	0.0989518	-0.0144226	0.023073	0.564649
5730508B09Rik	-0.253257	6.18153	23.4252	1.29864e-06	0.015807	6.18153	0.0908621	0.763084	0.0908926	-0.00222297	7.63627e-06	0.774692
5830417I10Rik	-1.93621	5.28147	463.931	6.70484e-103	-0.0436869	5.28147	0.236778	0.626543	0.584595	-0.00784203	0	0.644169
6330403K07Rik	7.57751	5.21894	1847.55	0	-0.236764	5.21894	0.67709	0.410591	-0.991419	-0.00135806	0	0.434267
6330408A02Rik	0.110775	4.46712	1.5977	0.20623	0.0400881	4.46712	0.209429	0.647215	-0.0326828	0.017073	0.229058	0.663764
6330416G13Rik	0.0322658	5.32207	0.136339	0.711948	-0.137261	5.32207	2.46079	0.11672	-0.00771915	-0.0387864	0.725992	0.136223
6330549D23Rik	0.065075	3.90926	0.519342	0.471123	0.0652655	3.90926	0.522569	0.469748	-0.0156149	0.0217451	0.49312	0.492631
6430550D23Rik	0.155799	5.39077	6.03033	0.0140621	-0.00445151	5.39077	0.00491105	0.944131	-0.0470386	-0.0039579	0.0188807	0.947249
6820431F20Rik	-0.0469671	3.47965	0.0961786	0.756465	-0.30887	3.47965	4.20415	0.0403252	0.0126588	-0.111864	0.76859	0.0505292
8430408G22Rik	0.0893712	6.75797	3.75436	0.0526701	0.0387101	6.75797	0.704307	0.40134	-0.0347848	0.0160679	0.0645608	0.425302
8430419L09Rik	0.340184	6.07652	34.1552	5.08859e-09	-0.0281927	6.07652	0.234851	0.62795	-0.110489	-0.00856867	0	0.645475
9030025P20Rik	-2.2547	4.686	236.406	2.38976e-53	-0.0746291	4.686	0.265036	0.606681	0.638602	-0.0208376	0	0.625361
9030617O03Rik	0.00596433	7.09116	0.017004	0.89625	0.0509715	7.09116	1.24056	0.265364	0.000547179	0.018554	0.901759	0.290022
9130008F23Rik	1.21324	3.53642	64.8219	8.19813e-16	0.00417948	3.53642	0.000737622	0.978333	-0.387978	0.00432661	0	0.979512
9130208D14Rik	0.410771	3.75972	12.075	0.000511025	-0.0458794	3.75972	0.151245	0.697348	-0.144155	-0.02137	0.000870535	0.711719
9130401M01Rik	-0.258588	5.62672	16.0237	6.25561e-05	-0.02048	5.62672	0.100551	0.75117	0.0922993	-0.00617735	0.000114544	0.763104
9230104L09Rik	-0.612799	3.14662	12.8613	0.000335455	0.173474	3.14662	1.02843	0.310528	0.210744	0.0494718	0.000542175	0.334957
9230112E08Rik	-0.0896907	4.43885	1.19793	0.273735	0.00527823	4.43885	0.00416749	0.948527	0.0329553	0.00143355	0.297479	0.951514
9330133O14Rik	-0.171698	3.02059	1.3281	0.249144	0.0322888	3.02059	0.048373	0.825919	0.0512623	0.0226113	0.272737	0.834816
9330160F10Rik	-0.468599	4.67324	31.7809	1.72584e-08	-0.012258	4.67324	0.0219146	0.882314	0.164309	-0.00604236	0	0.888705
9330162012Rik	-0.472864	4.67863	23.4122	1.30745e-06	0.0453186	4.67863	0.214006	0.643646	0.165983	0.0150752	7.63627e-06	0.660304
9430008C03Rik	-0.216865	4.90655	9.80076	0.0017444	0.12276	4.90655	3.13787	0.0764938	0.0806735	0.0407289	0.00264215	0.0919407
9430015G10Rik	-0.453335	5.68233	49.249	2.25451e-12	-0.0142818	5.68233	0.0488868	0.825012	0.158422	-0.00556808	0	0.833999
9430016H08Rik	-0.252088	2.83671	3.02972	0.081752	0.0525605	2.83671	0.131415	0.716969	0.0875294	0.0189291	0.0971792	0.730268
9430038I01Rik	0.56446	3.17827	9.17973	0.00244711	-0.106293	3.17827	0.333562	0.563569	-0.181463	-0.0329646	0.00382195	0.583621
9430069I07Rik	-0.145255	3.13875	1.22896	0.26761	-0.0523745	3.13875	0.16016	0.689009	0.0572849	-0.0247548	0.291469	0.703762
9630028H03Rik	0.105822	3.68075	0.844617	0.35808	-0.0243992	3.68075	0.0451228	0.831778	-0.029964	-0.0096288	0.381928	0.840421
9630033F20Rik	0.451452	5.49433	60.1807	8.65371e-15	-0.139767	5.49433	5.75745	0.0164189	-0.149837	-0.0500574	0	0.0217557
9830147E19Rik	0.358524	4.07753	9.20823	0.00240929	0.23612	4.07753	3.99193	0.0457186	-0.120967	0.0820426	0.0037265	0.0568329
9930111J21Rik2	0.187737	2.94852	1.32362	0.249943	0.0976485	2.94852	0.356079	0.550692	-0.0642899	0.0322424	0.273581	0.571006
A130051J06Rik	-0.861676	3.38787	28.8652	7.7593e-08	0.0448218	3.38787	0.0754669	0.783537	0.283574	0.00671506	0	0.794611
A230056P14Rik	-0.108287	3.53915	0.858587	0.354134	-0.0120308	3.53915	0.0107002	0.917613	0.0538896	-0.00357411	0.377976	0.922477
A430005L14Rik	0.136655	4.22929	2.12029	0.145359	-0.134436	4.22929	2.05298	0.151909	-0.0502829	-0.0550133	0.164795	0.173141
A430105I19Rik	-0.0720671	8.49783	3.40797	0.0648821	-0.00966649	8.49783	0.0613255	0.804413	0.0282763	-0.00353276	0.0782221	0.814549
A530032D15Rik	-1.04007	5.34223	78.8065	6.85026e-19	-0.00174676	5.34223	0.00021276	0.988362	0.334634	-0.00473595	0	0.989023
A530040E14Rik	-0.543576	4.67341	6.42162	0.0112739	-0.0063198	4.67341	0.000889104	0.976212	0.160654	-0.00194637	0.0153374	0.977488
A530054K11Rik	-0.737687	5.30067	83.4857	6.41778e-20	-0.0481547	5.30067	0.355403	0.55107	0.251657	-0.0165677	0	0.571372
A630007B06Rik	-0.254402	7.21664	43.8558	3.53482e-11	-0.010159	7.21664	0.0699396	0.791425	0.0912628	-0.00441296	0	0.802396
A730049H05Rik	-0.0136789	4.22149	0.0171977	0.895665	-0.0201667	4.22149	0.0375912	0.846266	0.00542857	-0.00861614	0.901286	0.85467
A730071L15Rik	-0.0713268	3.52673	0.542741	0.461299	-0.135066	3.52673	1.94584	0.163036	0.0271806	-0.050452	0.483605	0.184935
A830010M20Rik	0.271274	4.33338	7.01392	0.00808784	-0.0549049	4.33338	0.288158	0.591403	-0.0864513	-0.0233355	0.0112215	0.610344
A830073O21Rik	0.726373	3.92489	41.0925	1.45196e-10	0.0583147	3.92489	0.264968	0.606727	-0.234706	0.0148938	0	0.625395
A930015D03Rik	-1.45097	5.66177	186.158	2.19328e-42	-0.0354157	5.66177	0.112386	0.737444	0.453931	-0.0116292	0	0.749939
A930028C08Rik	0.075602	5.40465	1.66889	0.196407	0.0427901	5.40465	0.534678	0.464647	-0.0210741	0.0145135	0.218722	0.487564
A930033H14Rik	-0.568755	3.05692	12.0104	0.00052905	0.0739771	3.05692	0.199044	0.655494	0.191779	0.0219809	0.000889625	0.671778
AA987161	0.0670543	4.0737	0.408753	0.522603	-0.234203	4.0737	4.98526	0.0255642	-0.0185116	-0.0797184	0.54345	0.0331109
Aacs	0.0813145	7.51481	3.45078	0.0632221	-0.00985513	7.51481	0.0507058	0.82184	-0.0240237	-0.00524672	0.0763131	0.830994
Aaed1	-0.226489	5.8805	13.3697	0.000255725	-0.0783461	5.8805	1.60032	0.205858	0.0813582	-0.0281875	0.000431449	0.229859
Aagab	0.131567	4.89984	3.02536	0.0819722	0.00785891	4.89984	0.0107715	0.917339	-0.0399356	0.00637627	0.0974579	0.922206
Aak1	0.0237839	5.95603	0.0779395	0.780109	0.0188103	5.95603	0.0491334	0.824578	0.000710034	0.00974484	0.791224	0.833587
Aamp	-0.318701	7.02621	60.5003	7.35671e-15	0.0135046	7.02621	0.10858	0.741766	0.114171	0.00468664	0	0.754017
Aar2	0.0378673	6.09499	0.581723	0.445638	-0.0364605	6.09499	0.539332	0.46271	-0.00915894	-0.0122513	0.468348	0.485617
Aars2	-0.0300666	3.6173	0.0462719	0.829682	0.139856	3.6173	0.992132	0.319222	0.0174388	0.0479735	0.83842	0.343586
Aarsd1	-0.344257	5.34411	19.0741	1.2574e-05	0.00910687	5.34411	0.0132755	0.908271	0.119879	0.00356329	2.67269e-05	0.913657
Aasdh	-0.0152048	4.84214	0.0259634	0.87199	-0.0118156	4.84214	0.0156784	0.900355	0.0100192	-0.00630012	0.878961	0.906017
Aasdhppt	5.9866	3.77076	597.506	5.83913e-132	-0.520945	3.77076	3.34287	0.0674966	-0.969226	-0.014115	0	0.0817272
Aass	-3.1809	5.53066	123.523	1.07112e-28	-0.538862	5.53066	3.85826	0.0495015	0.736193	-0.0874075	0	0.0609565
Aatf	-0.145734	5.97452	5.12596	0.0235705	0.0756568	5.97452	1.38172	0.239809	0.0519942	0.0264882	0.0306062	0.26462
Abca1	0.555056	3.38548	15.7008	7.41926e-05	0.25399	3.38548	3.27985	0.0701352	-0.181844	0.0818001	0.000125998	0.0847779
Abca3	-0.558136	6.60247	114.493	1.01622e-26	-0.0173109	6.60247	0.110291	0.739814	0.195741	-0.00704863	0	0.752211
Abca4	0.136519	4.49671	0.968425	0.325073	0.0767224	4.49671	0.307857	0.578998	-0.0394335	0.0327538	0.348806	0.598508
Abca5	1.22519	6.92332	586.464	1.47248e-129	0.0339269	6.92332	0.452	0.501387	-0.397185	0.010412	0	0.523619
Abca6	-0.370596	7.39218	41.6865	1.07144e-10	0.0475127	7.39218	0.685944	0.407548	0.129406	0.0149532	0	0.431426
Abca9	-0.302732	5.77241	19.5108	1.00031e-05	-0.0729195	5.77241	1.13197	0.287355	0.106188	-0.0287451	1.52725e-05	0.311827
Abcb10	0.372373	4.95826	18.2785	1.90849e-05	0.147271	4.95826	2.86056	0.0907758	-0.120824	0.0512056	4.58176e-05	0.107805
Abcb1a	-0.307477	6.23336	18.1431	2.04909e-05	0.0412107	6.23336	0.326282	0.567857	0.10571	0.0140246	4.96357e-05	0.587809
Abcb1b	-0.862726	7.0778	235.637	3.51613e-53	-0.0805811	7.0778	2.06857	0.150363	0.292306	-0.0268071	0	0.171545
Abcb4	-0.158503	4.86559	1.92482	0.165327	-0.0889586	4.86559	0.608106	0.435502	0.0467813	-0.0313109	0.186008	0.458925
Abcb6	0.160583	5.94595	6.27115	0.0122719	0.0135931	5.94595	0.0449228	0.832146	-0.0514308	0.00369934	0.0166432	0.840788
Abcb8	0.40479	7.0394	66.3292	3.81555e-16	-0.018704	7.0394	0.141581	0.706715	-0.136201	-0.0070913	0	0.720306
Abcc3	0.711784	7.01369	98.8772	2.68648e-23	-0.029488	7.01369	0.17092	0.679295	-0.236735	-0.00984737	0	0.694293
Abcc9	-0.0434148	8.38189	0.439288	0.507466	-0.0299563	8.38189	0.209309	0.647309	0.0181622	-0.0110294	0.528663	0.66389
Abcd2	-0.0691995	10.527	10.1172	0.00146891	0.000414194	10.527	0.000362607	0.984807	0.0277224	0.000158957	0.00232906	0.985445
Abcd3	-0.0315683	8.94686	0.890616	0.345311	0.0151059	8.94686	0.203934	0.651564	0.0151056	0.00520174	0.368881	0.66812
Abcf1	-0.0479733	6.25243	0.381326	0.536895	-0.142392	6.25243	3.36033	0.0667845	0.0187381	-0.0488328	0.557417	0.0809788
Abcf2	-0.0669009	6.0876	0.936688	0.333131	0.0577144	6.0876	0.696993	0.403796	0.0265136	0.0184048	0.357171	0.427765
Abcg1	0.290111	8.52599	73.3486	1.08656e-17	-0.0638634	8.52599	3.55763	0.0592723	-0.0981206	-0.0241212	0	0.0721246
Abcg2	2.34305	4.1714	425.878	1.28251e-94	-0.142197	4.1714	1.5018	0.220395	-0.668898	-0.030289	0	0.244842
Abhd10	1.51356	5.03608	375.078	1.46723e-83	0.0518508	5.03608	0.433047	0.510498	-0.476652	0.0142504	0	0.532332
Abhd15	0.0582856	5.82893	0.952643	0.329048	0.074726	5.82893	1.56654	0.21071	-0.0145905	0.0284189	0.353124	0.234857
Abhd16a	0.0474596	9.3576	1.00506	0.316089	-0.013615	9.3576	0.0827388	0.77362	-0.0126097	-0.00522002	0.339986	0.785016
Abhd17b	0.312238	6.63556	58.0633	2.53823e-14	0.0361496	6.63556	0.777862	0.377796	-0.103788	0.0134933	0	0.402008
Abhd17c	0.208917	4.89884	4.62984	0.0314205	-0.0262364	4.89884	0.0729265	0.787122	-0.0644191	-0.00782428	0.0401362	0.798086
Abhd2	-0.0965535	7.28731	5.11447	0.0237271	-0.0295109	7.28731	0.477809	0.489417	0.0379077	-0.0106474	0.0308238	0.511939
Abhd6	8.07425	4.55476	1396.1	1.47864e-305	0.459592	4.55476	1.73118	0.18826	-0.995657	0.00196187	0	0.211666
Abi2	-0.0178334	5.15121	0.0636928	0.800752	0.0502007	5.15121	0.504862	0.477372	0.0069129	0.0122208	0.810453	0.50016
Abi3	0.0051724	3.80226	0.00174686	0.966662	-0.175054	3.80226	2.061	0.151111	0.00249002	-0.0557272	0.968699	0.172324
Abi3bp	-1.0211	7.50571	209.268	1.98378e-47	0.0291131	7.50571	0.172084	0.678266	0.34135	0.00752368	0	0.693263
Abl2	0.404636	3.71399	7.62149	0.00576768	0.0568062	3.71399	0.1507	0.697867	-0.134945	0.0193091	0.00825099	0.712178
Ablim1	-0.0302153	10.1174	1.73407	0.187892	-0.00749702	10.1174	0.106762	0.743861	0.0142213	-0.00303761	0.209932	0.756017
Ablim3	0.011852	7.76938	0.0294348	0.863779	-0.0113132	7.76938	0.0268157	0.869924	-0.000609959	-0.0045651	0.870943	0.876995
Abr	0.202105	5.94608	10.3671	0.00128278	-0.082485	5.94608	1.727	0.188794	-0.0661194	-0.0290318	0.00206179	0.212288
Abracl	0.0403093	6.69069	0.572383	0.449314	0.0703308	6.69069	1.74361	0.186682	-0.00964564	0.026003	0.471811	0.209982
Abt1	0.245077	4.70505	9.29565	0.00229699	-0.0577111	4.70505	0.514934	0.473011	-0.0818065	-0.0189722	0.00353559	0.496025
Abtb1	0.132474	4.68828	1.81078	0.178415	-0.061492	4.68828	0.389568	0.532526	-0.0433206	-0.0206836	0.200292	0.553465
AC020971.1	0.238953	5.58737	11.0114	0.000905509	0.0259581	5.58737	0.130105	0.718323	-0.0752679	0.0109366	0.00147762	0.731524
AC025622.1	0.428305	4.23763	18.1217	2.07226e-05	-0.0911613	4.23763	0.820252	0.365107	-0.142256	-0.0312102	4.96357e-05	0.389664
AC087901.1	-0.232129	3.26805	2.5102	0.113111	-0.2279	3.26805	2.42652	0.119298	0.0786969	-0.0890487	0.131187	0.139041
AC098726.1	0.103655	5.20748	2.0699	0.150232	-0.0190455	5.20748	0.0698256	0.791591	-0.0343471	-0.00772866	0.17001	0.802538
AC099934.1	-0.331306	4.37204	1.49211	0.221889	0.297497	4.37204	1.20628	0.27207	0.0887595	0.0803889	0.245319	0.296646
AC100751.1	0.0616124	4.51699	0.639732	0.423808	0.0222027	4.51699	0.0828216	0.77351	-0.0258056	0.00485555	0.447443	0.784886
AC108401.1	-0.260179	4.61644	10.9397	0.00094126	0.0199156	4.61644	0.0637689	0.800635	0.0841489	0.00745993	0.0015158	0.810976
AC108401.2	0.207726	3.82939	1.94433	0.163199	0.120304	3.82939	0.655406	0.418186	-0.0616049	0.0472259	0.183809	0.441949
AC109197.1	-0.112589	2.8525	0.619567	0.431208	-0.110612	2.8525	0.597538	0.439519	0.0471852	-0.0389358	0.454515	0.462838
AC117213.1	-0.224844	5.90726	17.5644	2.77747e-05	0.0148192	5.90726	0.0763614	0.78229	0.0819027	0.00564097	7.25446e-05	0.793374
AC120176.1	-0.14155	4.92603	3.40926	0.0648315	0.00140566	4.92603	0.000325871	0.985597	0.0538958	0.000134648	0.0781534	0.986171
AC121121.1	0.888414	3.74044	64.5909	9.21789e-16	-0.0740245	3.74044	0.448288	0.503149	-0.29635	-0.0208875	0	0.525414
AC121292.1	7.87569	7.48688	6845.99	0	-0.257348	7.48688	2.96541	0.0850631	-0.991653	-0.00155895	0	0.101524
AC121499.1	-0.268439	3.15801	4.42561	0.0354035	0.177517	3.15801	1.93646	0.164054	0.0835684	0.0560944	0.044592	0.185978
AC122247.1	-0.789783	3.62488	32.9284	9.5615e-09	0.142806	3.62488	1.07539	0.299731	0.262496	0.0406387	0	0.324049
AC122371.1	0.0782067	5.36428	1.34784	0.245656	-0.11131	5.36428	2.7302	0.0984672	-0.0218744	-0.0379952	0.269251	0.116193
AC122487.1	1.15198	3.64701	73.0955	1.23524e-17	0.00741731	3.64701	0.00301071	0.956242	-0.36974	-0.000829808	0	0.958734
AC122821.1	-0.730727	4.40633	72.6658	1.53575e-17	0.231657	4.40633	7.26954	0.00701338	0.249115	0.0744038	0	0.00973624
AC124446.1	0.430142	4.19721	22.536	2.06238e-06	-0.104009	4.19721	1.31484	0.251519	-0.138031	-0.0377383	1.14544e-05	0.276318
AC125486.1	-0.474126	4.52166	29.0667	6.99302e-08	0.0600356	4.52166	0.464196	0.495669	0.162292	0.0111253	0	0.517999
AC127595.1	-1.95905	4.74505	423.657	3.90355e-94	0.0921602	4.74505	0.92105	0.337199	0.592326	0.0183041	0	0.361501
AC130214.1	0.712725	4.64495	69.2455	8.69408e-17	-0.11938	4.64495	1.93292	0.16444	-0.249277	-0.0342694	0	0.186344
AC131759.1	-0.122081	4.31468	1.43266	0.231331	0.13262	4.31468	1.68839	0.193813	0.0472598	0.0413694	0.254761	0.217588
AC132347.1	0.316167	4.41362	11.313	0.000769657	0.0210402	4.41362	0.0501154	0.822863	-0.104746	0.00676658	0.00127144	0.831876
AC133646.1	0.57269	3.78095	30.3022	3.69706e-08	0.0712254	3.78095	0.466239	0.494723	-0.19124	0.022697	0	0.517101
AC136008.1	-0.453654	6.0654	56.098	6.89479e-14	0.046436	6.0654	0.58753	0.443376	0.158494	0.0163687	0	0.466645
AC136215.1	1.15094	5.84299	270.877	7.30795e-61	-0.100857	5.84299	2.08711	0.148547	-0.371143	-0.0311423	0	0.169728
AC137938.1	0.0158834	3.85693	0.0199516	0.887672	-0.130686	3.85693	1.34558	0.246053	-0.00420308	-0.0434978	0.89386	0.270984
AC138214.1	2.22896	2.84407	148.31	4.05816e-34	0.227484	2.84407	1.42674	0.232297	-0.636285	0.0444212	0	0.256949
AC140312.1	-0.620295	4.77468	62.9786	2.08969e-15	0.0375794	4.77468	0.230363	0.631255	0.212447	0.00739596	0	0.648606
AC140333.2	0.484673	3.97117	22.8776	1.72654e-06	-0.0275054	3.97117	0.0730462	0.786952	-0.162624	-0.0134705	7.63627e-06	0.797929
AC140392.1	-0.00213679	6.41059	0.00213004	0.963189	0.0204451	6.41059	0.194874	0.658891	0.00483453	0.00676615	0.965366	0.675092
AC140461.1	0.196335	4.96815	6.36462	0.0116418	-0.0800538	4.96815	1.05845	0.303569	-0.058032	-0.0309264	0.0158338	0.327947
AC141882.1	0.413797	4.13848	14.8835	0.000114356	-0.075716	4.13848	0.495781	0.48136	-0.140506	-0.0250823	0.000190907	0.504337
AC144852.1	-0.0742703	2.74421	0.247665	0.618724	0.0280436	2.74421	0.0352774	0.851016	0.0404468	0.0136621	0.636697	0.859218
AC147987.1	-0.661877	3.30114	13.1508	0.0002874	-0.0862271	3.30114	0.226298	0.634282	0.214319	-0.0254693	0.000484903	0.651389
AC148328.2	0.27143	3.93815	6.26891	0.0122875	0.0125852	3.93815	0.0134857	0.907551	-0.0935414	-0.00199587	0.01667	0.912943
AC149055.1	0.263724	5.76681	19.5672	9.71226e-06	0.0303807	5.76681	0.26008	0.610066	-0.0863495	0.013934	1.52725e-05	0.628564
AC153506.1	-0.846501	4.84991	98.1941	3.79309e-23	-0.0212095	4.84991	0.061121	0.804733	0.286247	-0.0109079	0	0.814824
AC153516.1	0.100007	3.77608	1.12537	0.288766	0.0222275	3.77608	0.0557599	0.813328	-0.0291163	0.0126327	0.312732	0.822915
AC154200.1	-0.15959	3.8402	2.41165	0.120435	0.0949884	3.8402	0.855387	0.355033	0.0592573	0.0367004	0.138835	0.379771
AC154486.1	-0.414155	3.52105	8.14284	0.00432316	-0.272784	3.52105	3.53687	0.0600187	0.13944	-0.0898562	0.00627701	0.0729569
AC154625.1	-0.0424295	5.08211	0.39399	0.530209	-0.0419047	5.08211	0.384288	0.535317	0.0190667	-0.0143588	0.550774	0.556119
AC154766.1	0.0353557	3.24626	0.07407	0.785501	0.0878631	3.24626	0.456204	0.499404	-0.0161498	0.0266075	0.796089	0.521572
AC154811.1	-0.193885	3.6281	2.67039	0.102231	-0.21715	3.6281	3.3503	0.067193	0.0664573	-0.0745791	0.119332	0.0814026
AC154910.1	0.084601	3.55126	0.709022	0.399769	0.00606478	3.55126	0.00372484	0.951334	-0.0219635	0.0181595	0.423462	0.954087
AC155921.1	-0.695228	3.63608	42.505	7.05009e-11	0.0202453	3.63608	0.0382289	0.844984	0.240046	0.00674696	0	0.853319
AC158662.1	0.171672	3.95533	2.73276	0.0983093	-0.113675	3.95533	1.19963	0.273395	-0.0601038	-0.0461225	0.114945	0.297845
AC158993.1	0.0151059	4.65569	0.0247709	0.874939	-0.107789	4.65569	1.27098	0.259584	-0.000808286	-0.0404113	0.881668	0.284546
AC158998.1	-0.311157	3.19755	2.82915	0.0925671	-0.130082	3.19755	0.50065	0.479214	0.0963233	-0.0447044	0.108718	0.502192
AC159323.1	0.0375873	4.71408	0.230352	0.631263	-0.109567	4.71408	1.95876	0.161646	-0.00992127	-0.0379292	0.648407	0.183503
AC161602.1	0.0976221	4.90764	1.83914	0.175052	0.0942885	4.90764	1.71609	0.190198	-0.0324204	0.0351313	0.196668	0.213751
AC161812.1	-0.47217	2.65855	9.97213	0.00158928	-0.0609226	2.65855	0.161416	0.687856	0.164189	-0.0259045	0.00245888	0.702659
AC163296.1	0.557891	4.13278	41.0265	1.50181e-10	0.00527228	4.13278	0.00356479	0.95239	-0.184442	0.00219983	0	0.955041
AC164597.1	-0.117699	3.3884	0.88184	0.347698	-0.0175308	3.3884	0.0196543	0.888507	0.0401471	-0.0175682	0.371466	0.894822
AC165433.1	-0.611554	7.21941	241.253	2.09628e-54	0.0272687	7.21941	0.479687	0.488564	0.210626	0.00708625	0	0.511111
AC167018.1	-0.354012	4.58155	9.00099	0.00269833	-0.0590801	4.58155	0.250513	0.616714	0.124069	-0.0206167	0.00411213	0.634815
AC169129.1	1.3904	3.16846	78.41	8.3728e-19	-0.212042	3.16846	1.76121	0.184473	-0.438316	-0.0647124	0	0.207787
AC170752.1	0.759763	4.94056	40.0346	2.49503e-10	-0.0795074	4.94056	0.438264	0.507961	-0.248732	-0.0230366	0	0.530003
Acaa1a	1.0966	8.49032	811.951	1.3606e-178	-0.0444014	8.49032	1.3486	0.245522	-0.358819	-0.014086	0	0.270438
Acaa1b	0.360949	8.29036	59.8165	1.04126e-14	0.00421693	8.29036	0.0081998	0.927848	-0.119169	0.00226243	0	0.932148
Acaa2	0.0890451	9.83061	9.85333	0.00169524	-0.0298683	9.83061	1.10871	0.292362	-0.0276582	-0.0108107	0.00258488	0.316821
Acaca	-0.152432	10.2658	25.1363	5.34176e-07	0.0185102	10.2658	0.370762	0.542589	0.0561493	0.0060272	3.81813e-06	0.563236
Acacb	-0.113846	8.55717	11.3341	0.000760949	-0.0432887	8.55717	1.63889	0.200478	0.0433002	-0.0159102	0.0012638	0.224441
Acad10	-0.794528	5.38357	94.4573	2.50436e-22	0.0686426	5.38357	0.707686	0.400213	0.264805	0.0261865	0	0.42426
Acad11	-0.147425	8.72176	10.8143	0.00100722	0.0458476	8.72176	1.04637	0.306344	0.0552727	0.0163685	0.00161507	0.330773
Acad12	0.850149	4.77719	20.142	7.19005e-06	0.0898259	4.77719	0.224935	0.635305	-0.26307	0.0310386	1.14544e-05	0.652428
Acad8	0.0966849	5.27968	2.1559	0.142024	0.135734	5.27968	4.25125	0.0392214	-0.0277133	0.0503838	0.161312	0.0491928
Acadl	0.323288	7.57096	46.1819	1.07768e-11	0.00496976	7.57096	0.0109226	0.916764	-0.107514	0.000692678	0	0.921686
Acads	-0.0375763	8.37198	1.47195	0.225039	-0.0064752	8.37198	0.0437183	0.834379	0.0161895	-0.00294385	0.248305	0.842968
Acadvl	0.154087	4.67531	3.3329	0.0679071	-0.0419685	4.67531	0.246783	0.619349	-0.0540185	-0.0116787	0.0817119	0.637449
Acap1	0.386617	4.45634	12.0449	0.000519355	-0.246959	4.45634	4.91519	0.0266215	-0.124643	-0.0778586	0.000878171	0.0344128
Acap2	0.137787	6.07671	7.46276	0.00629883	-0.085965	6.07671	2.90482	0.0883149	-0.0440657	-0.0315477	0.00897262	0.105033
Acap3	0.0788764	6.60919	2.41309	0.120325	-0.00861741	6.60919	0.0287771	0.865295	-0.0227941	-0.00312866	0.138728	0.872486
Acat2	0.66363	5.03487	33.0309	9.07042e-09	-0.254187	5.03487	4.86011	0.0274846	-0.219767	-0.0887243	0	0.0354285
Acat3	0.300042	3.12482	2.4359	0.118586	-0.0270358	3.12482	0.0214559	0.883544	-0.0852021	-0.010932	0.136953	0.889854
Acbd4	-0.019393	3.90332	0.0340989	0.853497	-0.0962656	3.90332	0.849641	0.356654	-0.00293385	-0.0497076	0.861207	0.381298
Acer2	-0.195338	6.49629	13.474	0.000241892	0.0862205	6.49629	2.62579	0.10514	0.0707373	0.0300125	0.000393268	0.123291
Acin1	-0.0235326	7.04002	0.281993	0.595398	0.0275498	7.04002	0.38652	0.534134	0.0113704	0.00907178	0.613994	0.554966
Acly	0.0954128	9.80314	12.3827	0.000433333	-0.0346704	9.80314	1.63523	0.200981	-0.0281368	-0.0125415	0.000702537	0.224953
Acot11	0.271305	4.98009	8.10001	0.0044265	0.102409	4.98009	1.15144	0.283249	-0.103353	0.0301716	0.00639538	0.307646
Acot13	-0.608345	5.89385	93.6364	3.79142e-22	-0.0820921	5.89385	1.70559	0.191558	0.209204	-0.0268577	0	0.215156
Acot2	-0.239956	5.71796	17.3228	3.15386e-05	-0.123793	5.71796	4.60982	0.0317894	0.0859724	-0.0411255	7.63627e-05	0.0405906
Acot4	-0.0744802	3.34765	0.228524	0.63262	0.298376	3.34765	3.7231	0.0536647	0.0231576	0.0999327	0.649637	0.065859
Acox1	-0.0773151	9.47173	9.38432	0.00218849	0.0174552	9.47173	0.478355	0.489168	0.0308528	0.00588238	0.00340196	0.51168
Acp1	0.338487	3.00565	6.14573	0.013173	-0.0295799	3.00565	0.0482075	0.826212	-0.126957	-0.010267	0.0177161	0.835083
Acp2	-0.296033	5.51988	11.5358	0.000682699	0.0575188	5.51988	0.435914	0.509101	0.106692	0.0206556	0.0011149	0.531068
Acp6	0.366347	4.50153	11.0088	0.000906811	-0.0390896	4.50153	0.125275	0.723382	-0.118599	-0.0120962	0.00148144	0.736549
Acpl2	-0.301341	4.77753	11.0772	0.000873976	0.0982517	4.77753	1.17818	0.277727	0.106472	0.0331167	0.0014318	0.30206
Acpp	3.08571	3.78184	40.8419	1.65056e-10	0.357809	3.78184	0.675017	0.411308	-0.669455	0.0220782	0	0.435023
Acpt	2.86224	2.76554	283.171	1.52961e-63	-0.426511	2.76554	5.34158	0.0208226	-0.747929	-0.0619708	0	0.0272309
Acrbp	-0.00927256	6.03198	0.028944	0.864908	0.0635814	6.03198	1.35968	0.243593	0.00807841	0.0228362	0.87202	0.268533
Acsf2	0.66396	6.1468	84.422	3.9967e-20	-0.0150773	6.1468	0.0436924	0.834427	-0.224196	-0.00674256	0	0.84304
Acsl1	-0.0594215	11.8174	10.9623	0.00092986	-0.00755685	11.8174	0.177302	0.673702	0.0244347	-0.00288814	0.00150435	0.689074
Acsl3	-0.207077	4.78762	4.88259	0.0271288	-0.144336	4.78762	2.3718	0.123545	0.0778788	-0.0456423	0.0349588	0.143608
Acss2	-0.911776	8.01442	345.44	4.16925e-77	0.106308	8.01442	4.74243	0.0294274	0.300995	0.0334206	0	0.0377461
Acss3	-0.811139	7.7826	414.625	3.60903e-92	-0.0187429	7.7826	0.222298	0.637295	0.276643	-0.00597463	0	0.654283
Acta2	3.05792	3.15706	336.538	3.62046e-75	0.064259	3.15706	0.133238	0.715098	-0.789202	0.015362	0	0.728485
Actl6a	-0.246855	6.30145	25.3651	4.74431e-07	-0.061367	6.30145	1.56709	0.210631	0.089019	-0.0213232	3.81813e-06	0.234716
Actn1	-0.2269	7.83057	37.4206	9.52119e-10	0.0311547	7.83057	0.705735	0.400863	0.0822826	0.0105451	0	0.424844
Actr10	0.210783	5.95112	11.6563	0.000639843	-0.0309782	5.95112	0.251741	0.615852	-0.0697083	-0.00923916	0.00106908	0.634101
Actr2	-0.137748	8.85521	21.4225	3.68414e-06	-0.00836537	8.85521	0.0790154	0.778636	0.0513812	-0.00338666	1.14544e-05	0.7899
Actr3	0.127073	7.62962	10.5976	0.00113235	0.00775738	7.62962	0.0395123	0.842437	-0.0397431	0.00385544	0.00179452	0.850738
Actr5	-0.275418	5.27183	17.2894	3.20978e-05	0.0893676	5.27183	1.81814	0.177535	0.09704	0.031292	8.01808e-05	0.200238
Acvr1c	-0.0518418	5.0976	0.553539	0.456875	-0.0663864	5.0976	0.907688	0.340729	0.0215104	-0.0255533	0.479111	0.364849
Acvr2b	-0.0701998	2.95645	0.130322	0.718098	-0.0356101	2.95645	0.0343451	0.852975	0.0226593	-0.0220345	0.732024	0.860936
Acvrl1	0.0104613	7.93418	0.0733813	0.786476	-0.0404538	7.93418	1.09731	0.294856	9.56337e-05	-0.014168	0.797108	0.319322
Acyp2	0.278042	6.70943	29.2065	6.50598e-08	0.0741575	6.70943	2.07654	0.149579	-0.0942088	0.0226719	0	0.170724
Adal	0.730126	6.41389	190.859	2.06501e-43	0.018119	6.41389	0.117625	0.731624	-0.243708	0.00555171	0	0.744277
Adam12	-0.053993	6.91931	1.18629	0.276079	-0.00845105	6.91931	0.029155	0.864422	0.0222838	-0.00597833	0.299941	0.871585
Adam17	-9.43323	5.40837	154.617	1.69766e-35	-0.0130548	5.40837	0.000408628	0.983872	0.986935	-0.000362445	0	0.984674
Adam19	0.189853	6.70976	15.8918	6.70691e-05	-0.00784213	6.70976	0.0271101	0.869218	-0.0610449	-0.00225419	0.000118362	0.876376
Adam22	-1.06542	5.9292	214.965	1.13413e-48	0.0245927	5.9292	0.115348	0.734136	0.353294	0.00510795	0	0.746659
Adam23	0.476364	6.5346	83.6846	5.80363e-20	0.239193	6.5346	21.1099	4.33688e-06	-0.157451	0.0806569	0	7.63627e-06
Adam8	0.0495096	6.45719	0.630075	0.427328	-0.0424918	6.45719	0.464385	0.495582	-0.0200566	-0.0235206	0.450895	0.517896
Adamts10	0.14981	5.91787	5.72987	0.0166787	0.0239832	5.91787	0.146865	0.701549	-0.0476298	0.00790796	0.0222177	0.715564
Adamts12	-0.0605926	3.89259	0.366208	0.545079	-0.152007	3.89259	2.31282	0.128311	0.0160176	-0.0585119	0.56566	0.148697
Adamts14	-0.372045	4.42829	15.9329	6.56277e-05	0.000797657	4.42829	4.81203e-05	0.994465	0.130057	-0.00524896	0.000118362	0.994697
Adamts15	-0.263185	4.7393	9.84654	0.00170152	0.0724907	4.7393	0.74709	0.387399	0.0930773	0.0223061	0.00258488	0.411393
Adamts16	0.137422	4.67105	1.46274	0.226494	0.0975878	4.67105	0.739375	0.389861	-0.0457479	0.0393869	0.249771	0.413817
Adamts2	-0.119744	8.46109	14.1076	0.000172645	0.00127324	8.46109	0.00159554	0.968138	0.0443288	-6.51508e-05	0.000278724	0.970005
Adamts4	0.900641	3.93593	76.7721	1.91867e-18	-0.0519728	3.93593	0.259437	0.610507	-0.30085	-0.0102186	0	0.628996
Adamts5	2.45481	4.02853	410.481	2.88077e-91	0.0369007	4.02853	0.0878209	0.766966	-0.692628	0.00724943	0	0.778544
Adamts6	-0.0132214	4.77734	0.0218537	0.882477	0.00989097	4.77734	0.0123127	0.911646	0.00560221	0.00397382	0.888808	0.916936
Adamts9	-0.179981	8.06331	22.8568	1.74534e-06	-0.0116133	8.06331	0.0952223	0.75764	0.0659724	-0.00472026	7.63627e-06	0.769343
Adamtsl1	-0.0447107	3.86917	0.0867896	0.768299	-0.0571183	3.86917	0.14296	0.705356	0.020871	-0.0296465	0.779633	0.719077
Adamtsl2	0.0924612	3.75953	0.354156	0.55177	-0.214821	3.75953	1.88695	0.169547	-0.0458772	-0.0712788	0.572029	0.191636
Adamtsl3	-0.768405	4.42302	59.153	1.45874e-14	0.0973683	4.42302	0.945242	0.330933	0.260969	0.0279651	0	0.355442
Adap2	-0.363748	3.30654	6.98563	0.00821668	0.00465861	3.30654	0.00105818	0.97405	0.120948	-0.00638802	0.0114239	0.975575
Adat1	-0.079649	3.32734	0.313403	0.575599	-0.0134024	3.32734	0.00903561	0.92427	0.0222217	-0.00611002	0.595045	0.928765
Adc	-0.187664	6.28314	8.48041	0.00358992	0.0193593	6.28314	0.0903611	0.763719	0.0674891	0.00900614	0.00535684	0.77528
Adck1	0.0540704	4.86572	0.267993	0.604681	0.079435	4.86572	0.578548	0.446882	-0.0120175	0.0267542	0.622803	0.470089
Adcy3	-0.397321	6.57369	56.4115	5.8786e-14	0.00376607	6.57369	0.00509007	0.943123	0.139987	0.00114718	0	0.946374
Adcy5	-0.0016244	8.7782	0.00287415	0.957245	-0.00492723	8.7782	0.0264533	0.870798	0.00418933	-0.00167463	0.959555	0.877797
Adcy7	-0.214212	7.32349	22.0284	2.68645e-06	-0.00970227	7.32349	0.0451269	0.831771	0.0768714	-0.00374683	1.14544e-05	0.840413
Adcy9	0.147264	5.20065	4.4823	0.0342476	0.203618	5.20065	8.57012	0.00341724	-0.046279	0.0690234	0.0433206	0.00502848
Add1	-0.0849884	7.61153	4.15389	0.041539	0.00810749	7.61153	0.0378045	0.845836	0.0330306	0.00255546	0.0516937	0.854216
Adh1	0.576998	6.41762	61.5236	4.37474e-15	-0.17758	6.41762	5.84625	0.0156103	-0.188591	-0.057784	0	0.0206561
Adh4	1.24332	2.90499	24.9557	5.86637e-07	-0.068271	2.90499	0.0836919	0.772355	-0.371015	-0.024441	3.81813e-06	0.78376
Adh5	5.18873	8.95015	6901.26	0	-0.0205301	8.95015	0.119935	0.729105	-0.945873	-0.000935383	0	0.74202
Adhfe1	-0.585207	4.69375	35.2405	2.91399e-09	-0.0116823	4.69375	0.0143403	0.90468	0.205756	-0.00670253	0	0.910148
Adig	0.256908	9.01636	47.3418	5.96264e-12	-0.0410105	9.01636	1.20733	0.271862	-0.0846515	-0.0143222	0	0.296421
Adipoq	0.309272	9.4702	138.856	4.73471e-32	0.00436653	9.4702	0.0276996	0.867817	-0.103681	0.00146472	0	0.874971
Adipor2	0.127844	9.39102	26.1178	3.21212e-07	0.0119583	9.39102	0.228554	0.632598	-0.0404146	0.00415114	3.81813e-06	0.649873
Adk	0.155551	7.26822	2.6824	0.101463	0.0668193	7.26822	0.495161	0.481634	-0.0493343	0.0221188	0.118412	0.504586
Adm	0.59465	4.44314	28.4651	9.54031e-08	0.0519835	4.44314	0.216516	0.641708	-0.200976	0.0161389	3.81813e-06	0.658464
Adora1	0.180711	5.38369	8.57027	0.00341697	0.00367577	5.38369	0.00353335	0.9526	-0.0612965	-0.00324431	0.00511248	0.955232
Adrb2	0.101415	4.2114	1.00466	0.316185	-0.181118	4.2114	3.19811	0.0737234	-0.0411777	-0.0645628	0.34007	0.0888747
Adrb3	0.13036	8.56668	0.955453	0.328335	0.094875	8.56668	0.506494	0.47666	-0.0389569	0.0310417	0.352284	0.499469
Adrbk2	-0.211674	5.94963	12.5378	0.000398803	-0.0746255	5.94963	1.55796	0.211964	0.0764341	-0.0235055	0.000652901	0.236232
Adss	-0.0763039	6.29831	2.5315	0.111594	-0.0562256	6.29831	1.37436	0.241065	0.0311683	-0.0197901	0.1295	0.265918
Aebp1	0.198355	8.2687	20.1189	7.27734e-06	0.0535224	8.2687	1.46562	0.226038	-0.0644815	0.0186095	1.14544e-05	0.250451
Aebp2	-0.765043	7.58159	335.076	7.53636e-75	-0.0596187	7.58159	2.04316	0.152892	0.261627	-0.0189995	0	0.174191
Aen	0.271888	4.26596	8.12552	0.00436464	0.182859	4.26596	3.67822	0.0551277	-0.0834855	0.0666329	0.00631901	0.0672908
Afap1	-0.147199	6.91365	9.68878	0.00185396	0.0268362	6.91365	0.321991	0.570414	0.054976	0.00986675	0.00283306	0.590188
Afap1l1	-0.23245	6.58235	23.886	1.02214e-06	-0.0105767	6.58235	0.0494035	0.824104	0.0842358	-0.0030457	7.63627e-06	0.833098
Afap1l2	0.341588	4.21723	2.74432	0.0976003	0.110701	4.21723	0.292122	0.588864	-0.102644	0.0417384	0.114185	0.607824
Aff3	-0.454167	4.74521	30.2474	3.80305e-08	-0.00480852	4.74521	0.00346702	0.953047	0.161532	-0.00187288	0	0.955694
Aff4	-0.0189677	7.76635	0.303502	0.581695	0.0108944	7.76635	0.100129	0.751675	0.00991515	0.00377285	0.600539	0.76357
Aftph	-0.0002963	6.62916	3.69315e-05	0.995151	0.0389099	6.62916	0.636069	0.425138	0.00468775	0.0124571	0.99554	0.448971
Agap1	0.291617	5.0379	17.9171	2.30744e-05	0.144018	5.0379	4.36904	0.0365976	-0.0993836	0.0534155	5.7272e-05	0.0461842
Agap3	0.282511	6.62463	14.3349	0.000153004	-0.115566	6.62463	2.4003	0.121312	-0.0931011	-0.0391251	0.000240542	0.141099
Agfg1	-0.0553154	6.60901	1.01283	0.314226	0.102882	6.60901	3.50324	0.0612489	0.023205	0.0356759	0.337962	0.0744994
Agfg2	0.160603	7.36174	15.1861	9.74187e-05	0.0314902	7.36174	0.583824	0.444817	-0.051719	0.00963712	0.00016418	0.46797
Agmo	0.187407	6.80608	15.707	7.39486e-05	0.0567436	6.80608	1.44012	0.23012	-0.0611243	0.0194824	0.000125998	0.254662
Agpat1	-0.388447	7.45893	105.457	9.69708e-25	0.0134824	7.45893	0.126993	0.721571	0.137743	0.00438937	0	0.734743
Agpat4	0.455464	6.0063	40.4147	2.05386e-10	-0.0793512	6.0063	1.22847	0.267704	-0.149296	-0.02743	0	0.292469
Agphd1	-0.178769	4.91061	5.69312	0.0170316	0.0530958	4.91061	0.50141	0.478881	0.0649827	0.0170213	0.0226644	0.501856
Agps	-0.0138499	7.25853	0.0958455	0.756873	0.00382227	7.25853	0.00729773	0.931922	0.00914442	0.000208824	0.768938	0.935775
Agrn	0.201715	5.72137	10.3814	0.0012729	-0.0646766	5.72137	1.06685	0.301657	-0.0656879	-0.0194393	0.00205034	0.325939
Agt	-0.330064	6.89679	30.4372	3.44845e-08	-0.0725689	6.89679	1.47396	0.224722	0.116373	-0.0256859	0	0.249114
Agtrap	0.717026	4.41936	59.5058	1.21934e-14	-0.0538	4.41936	0.335708	0.562317	-0.239236	-0.0151431	0	0.582361
Agxt2l2	-0.0293188	4.97465	0.154498	0.694273	-0.0472794	4.97465	0.401859	0.526131	0.0129468	-0.0175407	0.709402	0.547353
Ahcy	-6.486	5.91687	37.4592	9.33454e-10	1.65417	5.91687	2.61107	0.10612	0.739651	0.0994605	0	0.12433
Ahcyl1	0.0841649	6.70995	2.89567	0.0888178	-0.014068	6.70995	0.0809577	0.776004	-0.024622	-0.00679783	0.104659	0.787444
Ahdc1	-0.241767	6.03576	21.6028	3.35357e-06	0.0758414	6.03576	2.12429	0.14498	0.0874039	0.024913	1.14544e-05	0.166066
Ahnak	-0.248601	8.43551	59.4324	1.26566e-14	0.0108063	8.43551	0.112426	0.737398	0.09123	0.00468617	0	0.749924
Ahnak2	0.264417	7.19379	34.5712	4.10945e-09	0.0495693	7.19379	1.21567	0.270213	-0.0876661	0.0183351	0	0.294875
Ahr	-0.0517793	4.54249	0.289338	0.590645	0.00241542	4.54249	0.000630949	0.97996	0.0208103	0.000184936	0.609309	0.980867
AI413582	-0.622833	5.28121	73.4649	1.0244e-17	0.0342562	5.28121	0.22283	0.636892	0.216164	0.0148023	0	0.653886
AI464131	-0.217166	8.21035	48.4529	3.38312e-12	-0.0167828	8.21035	0.2895	0.590541	0.0786479	-0.00682107	0	0.609542
AI597479	0.0640169	4.83838	0.555573	0.456049	-0.00503203	4.83838	0.00341015	0.953433	-0.0146642	-0.00195276	0.478324	0.956042
AI607873	0.206823	6.77077	5.10241	0.0238926	-0.0129811	6.77077	0.0202257	0.886908	-0.06449	-0.0049417	0.0310338	0.893123
AI987944	0.27793	2.89051	2.40653	0.12083	0.306318	2.89051	2.9148	0.0877703	-0.0866786	0.0896379	0.139247	0.10446
Aif1	0.116632	7.38652	2.93325	0.0867727	0.0125639	7.38652	0.0339721	0.853766	-0.0366653	0.00317756	0.102498	0.861642
Aifm2	-0.1759	6.79713	16.5686	4.69208e-05	0.024015	6.79713	0.308681	0.578491	0.0637424	0.00620376	9.92715e-05	0.597989
Aimp1	0.311071	5.81112	22.4998	2.10171e-06	-0.0299195	5.81112	0.208355	0.64806	-0.102849	-0.0104543	1.14544e-05	0.664623
Airn	-0.0205653	5.04513	0.0129012	0.909568	5.88299	5.04513	905.38	6.6407e-199	0.00327593	0.965461	0.914371	0
Ajuba	0.881	4.64421	107.665	3.18332e-25	-0.00871892	4.64421	0.0100912	0.919983	-0.288719	-0.00318016	0	0.924809
AK157302	1.24932	4.98366	289.969	5.05018e-65	-0.00169547	4.98366	0.000535525	0.981537	-0.406541	-0.0023864	0	0.982475
Ak2	0.0515483	10.2317	4.35293	0.0369454	0.0209275	10.2317	0.717475	0.396973	-0.0141764	0.0069289	0.0463025	0.420888
Akap1	0.0601532	7.01942	2.12418	0.14499	-0.00226163	7.01942	0.00299876	0.956329	-0.0161654	0.000143503	0.164378	0.958814
Akap10	3.31637	5.19232	932.99	6.61107e-205	-0.0973416	5.19232	0.774912	0.378702	-0.812689	-0.0126328	0	0.402954
Akap11	-0.120564	6.48554	5.38666	0.0202912	-0.0484244	6.48554	0.869297	0.35115	0.0431657	-0.0191168	0.0267193	0.375853
Akap12	-0.45216	5.06561	37.1986	1.0669e-09	-0.0109454	5.06561	0.0217	0.882888	0.160481	-0.00858868	0	0.889255
Akap13	0.0246805	8.20813	0.508531	0.475775	-0.0237401	8.20813	0.470484	0.492765	-0.00477868	-0.00818464	0.497491	0.515208
Akap2	0.188766	7.80202	28.5522	9.12048e-08	0.0121105	7.80202	0.117558	0.731698	-0.0618532	0.00418697	3.81813e-06	0.74433
Akap7	1.82639	5.32909	229.901	6.26581e-52	-0.143488	5.32909	1.45094	0.228377	-0.53782	-0.0260954	0	0.252833
Akap8	-0.0140224	4.42969	0.0236166	0.877865	0.0471499	4.42969	0.267694	0.604883	0.00358422	0.0137897	0.884311	0.623624
Akap8l	-0.020926	4.63552	0.0390144	0.84342	-0.077555	4.63552	0.540008	0.462429	0.005641	-0.033805	0.851486	0.485373
Akap9	0.212437	8.14195	32.9465	9.4728e-09	0.0427756	8.14195	1.33646	0.24766	-0.0693661	0.0145587	0	0.272516
Akirin1	0.0517046	6.54901	0.799354	0.371287	-0.00579325	6.54901	0.0100396	0.920187	-0.0125923	-0.00160644	0.394807	0.924977
Akirin2	-0.209834	5.41083	8.96419	0.00275323	-0.103196	5.41083	2.16809	0.140901	0.07822	-0.036483	0.00419613	0.161717
Akr1a1	-0.0846467	8.0969	6.00313	0.0142805	-0.00728636	8.0969	0.044481	0.832961	0.0332905	-0.00270886	0.0191556	0.841612
Akr1c12	1.83179	3.32134	67.0319	2.67155e-16	-0.341017	3.32134	2.39169	0.121981	-0.528051	-0.0819275	0	0.141886
Akr1c13	-0.424491	6.61256	33.1863	8.37402e-09	-0.0915668	6.61256	1.54784	0.213455	0.144618	-0.0338122	0	0.237927
Akr1c14	-1.50508	6.11162	80.5581	2.82278e-19	-0.319106	6.11162	3.7159	0.0538967	0.449786	-0.0815296	0	0.0661301
Akr1e1	-0.962462	6.55861	180.701	3.40732e-41	-0.248489	6.55861	12.1532	0.000490035	0.317862	-0.0785744	0	0.000851444
Akt1	0.00531968	7.10685	0.0130837	0.908933	-0.0431579	7.10685	0.861083	0.353436	0.00189744	-0.01511	0.913832	0.378118
Akt1s1	0.105304	6.50962	3.93425	0.0473121	0.0213346	6.50962	0.161426	0.687847	-0.0331605	0.00688926	0.0582991	0.702651
Akt2	-0.0402234	7.50665	0.788751	0.374478	-0.0425112	7.50665	0.88085	0.347969	0.0177658	-0.0141036	0.397918	0.372425
Akt3	0.300785	6.14664	28.4443	9.64354e-08	-0.0380834	6.14664	0.455962	0.499517	-0.101182	-0.0142593	3.81813e-06	0.521653
Aktip	-0.341866	7.61839	84.03	4.87327e-20	0.0106748	7.61839	0.0819608	0.774658	0.121154	0.00392956	0	0.786055
AL607123.1	0.14158	5.64445	7.6658	0.00562774	-0.050154	5.64445	0.961878	0.326714	-0.0460854	-0.0181772	0.00806008	0.351196
AL627304.1	-0.665605	3.08862	9.26106	0.00234078	-0.205567	3.08862	0.909126	0.340346	0.220194	-0.0601094	0.00362341	0.364494
AL645470.1	-0.0391299	4.19824	0.24951	0.61742	0.0948864	4.19824	1.46775	0.225702	0.0137354	0.0304155	0.635406	0.250092
AL670236.1	-0.318069	3.52532	7.54605	0.00601417	-0.0219626	3.52532	0.035433	0.850691	0.109985	-0.00643195	0.00861753	0.858924
AL731663.1	-0.831537	2.91051	22.7978	1.7997e-06	0.0568539	2.91051	0.102796	0.748499	0.27727	0.0120409	7.63627e-06	0.760557
AL731663.2	-0.218941	3.42899	1.10458	0.293264	0.0310006	3.42899	0.0219662	0.882177	0.0704786	0.00777972	0.317382	0.888575
AL732403.1	0.64251	4.80763	47.2173	6.35365e-12	-0.03528	4.80763	0.141473	0.706821	-0.213573	-0.0101904	0	0.720409
AL772190.1	0.196779	4.65599	4.38714	0.036211	0.0756388	4.65599	0.648402	0.420685	-0.0671276	0.0241964	0.0455274	0.444526
AL805969.1	-0.0533803	6.64508	1.43555	0.230862	-0.000896812	6.64508	0.000402831	0.983987	0.0248267	0.000167775	0.254307	0.984769
Alad	-1.33286	5.78223	277.502	2.62939e-62	0.0886988	5.78223	1.2339	0.26665	0.428661	0.0231076	0	0.291324
Alcam	1.28509	5.48981	243.718	6.08148e-55	0.0449989	5.48981	0.299887	0.583953	-0.410938	0.0134417	0	0.603124
Aldh1a1	-0.584164	9.53046	115.998	4.75806e-27	-0.0573386	9.53046	1.12398	0.289062	0.201785	-0.0193231	0	0.313415
Aldh1a3	0.365813	5.72924	30.5477	3.25755e-08	-0.0828328	5.72924	1.56817	0.210473	-0.121214	-0.0363126	0	0.234533
Aldh1a7	-1.39471	7.10311	63.1824	1.88424e-15	0.243194	7.10311	1.95329	0.162233	0.425718	0.0644882	0	0.184095
Aldh1l2	0.155986	3.17826	0.965381	0.325835	-0.0477603	3.17826	0.0919786	0.761677	-0.0554526	-0.0128422	0.349592	0.773336
Aldh2	0.0642962	8.38251	3.72265	0.0536791	0.00836416	8.38251	0.0630021	0.801812	-0.0189415	0.00236582	0.0655612	0.812079
Aldh4a1	0.307574	5.17272	12.2443	0.00046667	-0.00642234	5.17272	0.00537579	0.941552	-0.0974022	-0.00419075	0.000755991	0.944935
Aldh5a1	-0.931602	6.3766	196.071	1.5043e-44	0.110208	6.3766	2.75949	0.0966794	0.31099	0.0346737	0	0.114097
Aldh9a1	-0.0855886	4.60364	1.02248	0.31193	0.103059	4.60364	1.48301	0.223304	0.0363824	0.0408124	0.335583	0.24785
Alg1	-0.205649	7.18196	21.0334	4.51355e-06	-0.0705019	7.18196	2.47273	0.115836	0.0744334	-0.0243155	1.14544e-05	0.135185
Alg2	0.156142	6.00264	9.22996	0.00238086	-0.0258275	6.00264	0.252417	0.615378	-0.0500297	-0.00940251	0.00369214	0.633677
Alg6	-0.388173	3.83994	9.71206	0.00183063	0.231303	3.83994	3.45867	0.0629208	0.125882	0.087474	0.00279106	0.0765421
Alg9	0.296647	6.79057	35.6628	2.34606e-09	0.0243329	6.79057	0.240114	0.624124	-0.0983529	0.00798123	0	0.641916
Alkbh5	0.122517	3.90455	1.34209	0.246665	-0.0397555	3.90455	0.141472	0.706822	-0.0345176	-0.0120085	0.270236	0.720409
Alkbh6	0.011993	6.16903	0.053754	0.816655	-0.0401799	6.16903	0.603091	0.437401	-0.00170632	-0.0150468	0.82587	0.460887
Alox15	0.611684	4.63451	30.2011	3.89498e-08	-0.150923	4.63451	1.84092	0.174843	-0.212898	-0.0623451	0	0.197291
Alox5ap	0.0921825	6.62693	3.35612	0.0669555	0.0749016	6.62693	2.218	0.136409	-0.0219541	0.0312333	0.0805474	0.156872
Alpk1	1.23595	7.22537	717.669	4.30129e-158	-0.0520552	7.22537	1.28265	0.257408	-0.398861	-0.0150648	0	0.282382
Alpl	-0.444629	4.49474	9.62813	0.00191619	0.0217606	4.49474	0.0235397	0.878062	0.15665	0.0141491	0.0029056	0.884662
Als2cl	0.0476939	3.26826	0.0783491	0.779547	-0.236655	3.26826	1.90172	0.167886	-0.00773256	-0.0689759	0.790724	0.189792
Alyref	0.102471	5.99137	2.52485	0.112065	0.0061696	5.99137	0.00914998	0.923794	-0.0320679	0.0013249	0.130034	0.928357
Alyref2	0.065811	2.9763	0.154572	0.694204	-0.140369	2.9763	0.702787	0.401849	-0.0219177	-0.0582663	0.709341	0.425787
Ambra1	-0.275343	4.89422	8.7318	0.00312707	-0.0827591	4.89422	0.789968	0.37411	0.0941572	-0.0313928	0.00467721	0.398251
Amd1	-8.76698	3.78624	1054.58	2.46169e-231	-0.0333501	3.78624	1.91946e-10	0.999989	1	0	0	0.999775
Amdhd2	0.324353	4.3589	8.36275	0.00382991	0.144349	4.3589	1.65676	0.198042	-0.105674	0.048978	0.00565848	0.22199
Amigo2	0.209828	4.99615	5.14152	0.0233602	0.0182474	4.99615	0.0386416	0.84416	-0.0741863	0.00186959	0.0303274	0.852486
Ammecr1l	0.276369	4.56985	8.30262	0.0039588	0.102583	4.56985	1.1434	0.284936	-0.0909191	0.0333102	0.00581502	0.309429
Amotl2	0.104908	8.64654	10.7565	0.00103912	0.0144792	8.64654	0.204947	0.650757	-0.0329948	0.00494005	0.00166471	0.667246
Ampd3	-0.768219	6.31637	165.533	6.995e-38	0.0835693	6.31637	1.96357	0.161132	0.262729	0.0272334	0	0.182961
Amz2	-0.184755	3.81897	2.84207	0.0918257	-0.0183484	3.81897	0.0274545	0.868398	0.0710881	0.000560738	0.107889	0.875617
Anapc11	0.0634344	6.32571	1.69144	0.193412	0.040601	6.32571	0.692867	0.405191	-0.0184658	0.0139146	0.215656	0.429124
Anapc13	4.89121	6.84796	3218.82	0	0.0266587	6.84796	0.089544	0.764758	-0.933207	0.00144791	0	0.776372
Anapc16	-0.0270796	5.48639	0.154934	0.693864	-0.0489258	5.48639	0.506122	0.476822	0.0116344	-0.0174192	0.708986	0.499633
Anapc4	0.0867628	3.56642	0.407402	0.523291	0.0747127	3.56642	0.303005	0.582005	-0.024312	0.0287366	0.544057	0.601295
Anapc5	-0.00854069	8.74245	0.0250519	0.874238	-0.00817636	8.74245	0.0229663	0.879545	0.00676855	-0.00302592	0.881057	0.886074
Angel2	0.455197	7.16787	118.147	1.61013e-27	-0.054746	7.16787	1.71003	0.190982	-0.152729	-0.0192305	0	0.214564
Angpt1	-0.947499	4.8253	75.1782	4.30098e-18	0.103021	4.8253	0.897933	0.343337	0.312916	0.0322069	0	0.367595
Angptl1	-0.796433	3.65132	17.1779	3.40381e-05	-0.0466789	3.65132	0.0621597	0.803114	0.252694	-0.0312174	8.01808e-05	0.813286
Angptl3	1.58173	6.26382	181.236	2.60399e-41	-0.00368012	6.26382	0.00111687	0.97334	-0.483602	0.00598284	0	0.974984
Angptl4	0.114915	10.7033	23.4024	1.31412e-06	-0.00446986	10.7033	0.0354245	0.850709	-0.0364549	-0.00207636	7.63627e-06	0.858939
Angptl7	0.0449449	5.23337	0.167201	0.682611	-0.0851691	5.23337	0.599359	0.438823	-0.0116208	-0.0289148	0.698066	0.462223
Ank	-0.599417	7.32177	220.347	7.59887e-50	0.00225182	7.32177	0.00308393	0.955714	0.207119	0.000301427	0	0.958314
Ank2	-0.0775806	7.88726	3.50412	0.0612163	-0.0617121	7.88726	2.21739	0.136463	0.0305695	-0.0220506	0.0741825	0.156925
Ankef1	-3.82699	4.41889	580.716	2.62026e-128	0.0968277	4.41889	0.363307	0.546675	0.86464	0.0161031	0	0.567058
Ankhd1	0.0475542	5.04678	0.297553	0.58542	0.00177443	5.04678	0.000421803	0.983614	-0.0119544	0.00227144	0.604277	0.984464
Ankib1	0.0997051	6.21176	2.81279	0.0935154	-0.00536158	6.21176	0.00815027	0.928066	-0.0310105	-0.0034552	0.109852	0.932331
Ankmy2	0.0736874	5.6652	1.52342	0.217102	0.147002	5.6652	6.0631	0.0138035	-0.0227336	0.0487519	0.240394	0.018476
Ankrd10	-0.114445	6.03706	4.43451	0.0352194	-0.0309102	6.03706	0.323493	0.569516	0.0443007	-0.0110252	0.0443935	0.589299
Ankrd11	-0.0739374	6.98442	2.99609	0.0834656	0.0278718	6.98442	0.425707	0.514103	0.0297958	0.00923502	0.0990806	0.535898
Ankrd12	-2.65214	3.43552	130.971	2.51219e-30	-0.15807	3.43552	0.446763	0.503876	0.700825	-0.0232993	0	0.526093
Ankrd13a	-0.33893	6.05089	39.3225	3.59283e-10	-0.000664247	6.05089	0.000148687	0.990271	0.12102	-0.000628738	0	0.990688
Ankrd17	0.287909	8.23047	79.5424	4.71983e-19	-0.0200911	8.23047	0.3875	0.533617	-0.0955629	-0.00704868	0	0.554542
Ankrd26	-0.199932	5.34707	9.78916	0.00175543	-0.0461836	5.34707	0.522348	0.469842	0.0741587	-0.0163596	0.00266888	0.492696
Ankrd40	-3.69532	9.66902	11783.8	0	0.00559138	9.66902	0.0288934	0.865026	0.857453	0.000432965	0	0.872238
Ankrd42	0.0497296	5.22929	0.296373	0.586166	0.0655733	5.22929	0.51552	0.472759	-0.0137725	0.0222363	0.605052	0.495735
Ankrd44	0.131509	6.49236	7.66859	0.00561902	-0.0457644	6.49236	0.928683	0.335205	-0.0401527	-0.0147471	0.00804863	0.359726
Ankrd49	0.0906242	5.70635	1.89913	0.168175	-0.0545225	5.70635	0.687321	0.407077	-0.0280075	-0.0196455	0.189162	0.43096
Ankrd50	0.0999146	6.56254	6.74388	0.00940696	-0.0415182	6.56254	1.16444	0.280547	-0.0306087	-0.0133403	0.0129549	0.30492
Ankrd52	0.0504222	6.57405	0.969684	0.324759	-0.124511	6.57405	5.91335	0.0150266	-0.0123819	-0.0432552	0.348516	0.020007
Anks1	0.423941	7.34228	123.4	1.13967e-28	-0.0372298	7.34228	0.952169	0.329168	-0.141669	-0.0131221	0	0.353617
Anks3	0.209769	5.18029	5.60592	0.0178999	0.0360907	5.18029	0.166252	0.683465	-0.0681529	0.0137132	0.023745	0.698386
Anks6	-0.224535	4.3541	4.78918	0.0286391	0.127369	4.3541	1.53787	0.214935	0.0832517	0.0379145	0.036719	0.239382
Ankzf1	0.0414742	2.99772	0.0838077	0.772202	-0.233074	2.99772	2.63077	0.104811	-0.00875854	-0.0788286	0.783286	0.122967
Ano1	0.0140308	7.5712	0.101283	0.750295	0.0131293	7.5712	0.0887216	0.765809	-0.00159295	0.00557651	0.762653	0.777441
Ano6	0.121404	8.10923	12.7484	0.000356311	-0.000328891	8.10923	9.39776e-05	0.992265	-0.0386227	-0.00073182	0.000584175	0.99257
Anp32a	0.337197	4.18401	6.65345	0.00989641	0.189282	4.18401	2.09821	0.147472	-0.104082	0.06279	0.0135582	0.168536
Anp32e	0.206221	5.49532	17.1567	3.44186e-05	-0.0167435	5.49532	0.11308	0.736664	-0.0673431	-0.00520533	8.01808e-05	0.749141
Antxr1	-0.0072878	5.99651	0.0183898	0.89213	-0.00544471	5.99651	0.0103135	0.91911	0.000674717	-0.00230537	0.89814	0.923981
Antxr2	0.216802	7.79717	30.9608	2.63299e-08	-0.0664554	7.79717	2.90982	0.0880415	-0.0715357	-0.0233308	0	0.104781
Anxa1	0.753981	12.1318	381.685	5.34589e-85	0.0176266	12.1318	0.210805	0.646137	-0.250894	0.00535565	0	0.662809
Anxa2	-0.112792	5.28184	2.37145	0.123572	0.0838398	5.28184	1.31113	0.252189	0.0428403	0.0318748	0.14218	0.276895
Anxa4	0.0573323	8.11872	2.71815	0.099213	-0.00811589	8.11872	0.054466	0.815467	-0.0175373	-0.00308353	0.11601	0.824916
Anxa5	0.122223	11.2835	35.3461	2.76025e-09	0.0101986	11.2835	0.246148	0.6198	-0.0385674	0.00324492	0	0.637827
Anxa6	0.181668	11.1677	76.5593	2.13699e-18	-0.00174426	11.1677	0.0070638	0.93302	-0.0591384	-0.000960458	0	0.936898
Anxa7	-0.134379	6.73553	6.49085	0.0108431	-0.0172017	6.73553	0.10638	0.744304	0.0493037	-0.00665362	0.0147724	0.756449
Aoah	-0.572924	4.60873	28.4882	9.42709e-08	-0.0419499	4.60873	0.152831	0.695844	0.198422	-0.0174351	3.81813e-06	0.710368
Aoc3	-0.672738	11.4153	1027.74	1.67674e-225	-0.00852048	11.4153	0.166096	0.683605	0.23261	-0.00304218	0	0.698547
Aox1	-0.620662	8.47768	383.602	2.04557e-85	-0.0204662	8.47768	0.418251	0.517811	0.215684	-0.00675886	0	0.539411
Aox3	0.793312	4.0064	24.2664	8.38908e-07	-0.114635	4.0064	0.507479	0.476232	-0.248373	-0.0441839	7.63627e-06	0.499011
Ap1ar	0.427373	6.03569	40.6944	1.78e-10	0.0706779	6.03569	1.11421	0.291169	-0.142459	0.0244144	0	0.31566
Ap1b1	-0.520567	4.45354	19.7997	8.59972e-06	-0.0420535	4.45354	0.129489	0.718963	0.181141	-0.014533	1.52725e-05	0.732173
Ap1g2	-0.108893	4.91637	1.10876	0.292352	-0.0893118	4.91637	0.745919	0.387772	0.0393337	-0.0307641	0.316481	0.41179
Ap1m1	6.52843	3.95013	877.534	7.51192e-193	0.114876	3.95013	0.117544	0.731713	-0.982353	0.000944212	0	0.744338
Ap1s1	-0.0113663	6.85016	0.0510586	0.821231	-0.0622991	6.85016	1.53369	0.21556	0.00843309	-0.0222072	0.830177	0.240027
Ap2a1	-0.281651	3.57644	6.52067	0.0106628	0.0558662	3.57644	0.256304	0.612671	0.100463	0.0146589	0.0145089	0.631107
Ap2b1	0.0229893	7.78537	0.48781	0.484906	-0.0245813	7.78537	0.557725	0.455178	-0.00418218	-0.00880291	0.506659	0.478321
Ap3m1	0.383667	6.85367	77.2051	1.54092e-18	0.00580869	6.85367	0.0176496	0.89431	-0.12932	0.00116039	0	0.900278
Ap4b1	-0.206862	5.87394	11.7237	0.000617077	-0.0885398	5.87394	2.14797	0.142759	0.073975	-0.0329733	0.00104235	0.163745
Ap4e1	-0.79794	6.51654	112.382	2.94643e-26	0.0617456	6.51654	0.678145	0.410226	0.265872	0.0188933	0	0.433927
Ap4s1	-0.35093	5.46846	20.3965	6.29446e-06	-0.0298246	5.46846	0.146961	0.701456	0.123663	-0.00859394	1.14544e-05	0.715499
Ap5m1	-0.351006	5.29841	42.6297	6.61473e-11	-0.0301259	5.29841	0.313031	0.575826	0.126105	-0.00860488	0	0.595411
Apba1	0.328521	4.20572	10.129	0.00145957	0.0603378	4.20572	0.343372	0.55789	-0.0971748	0.0189208	0.00230615	0.578142
Apbb2	-0.0638479	3.60324	0.366269	0.545045	-0.136001	3.60324	1.66412	0.197049	0.027533	-0.0496141	0.565603	0.220894
Apbb3	0.081895	5.36358	1.28701	0.2566	-0.0679197	5.36358	0.884811	0.346887	-0.0251903	-0.0224203	0.280369	0.371233
Apcdd1	-0.723999	7.15296	332.744	2.42736e-74	-0.0601815	7.15296	2.29709	0.129617	0.250515	-0.0200121	0	0.150026
Aph1b	-0.690686	6.30096	148.738	3.27173e-34	-0.0173707	6.30096	0.0941836	0.758924	0.237799	-0.00638582	0	0.770702
Aph1c	-0.165218	5.85918	7.08051	0.00779267	0.0373198	5.85918	0.361444	0.547705	0.0679536	0.0140291	0.010813	0.5681
Aplnr	0.131962	6.29012	4.24302	0.039412	-0.0846747	6.29012	1.74826	0.186096	-0.0430155	-0.0341907	0.0490745	0.209413
Aplp2	0.0336146	10.784	2.52132	0.112317	-0.00954606	10.784	0.203341	0.652038	-0.00781172	-0.0034505	0.130328	0.668563
Apobec1	-0.285995	7.97478	30.5969	3.17602e-08	-0.00708461	7.97478	0.0187344	0.891131	0.0939728	-0.00259959	0	0.897262
Apod	-0.0746583	6.33023	1.47219	0.225001	0.0980717	6.33023	2.54082	0.110937	0.0249218	0.031061	0.248267	0.129767
Apol10b	0.722322	4.18281	21.3302	3.86594e-06	0.245347	4.18281	2.4696	0.116068	-0.239973	0.0814538	1.14544e-05	0.135418
Apol6	-0.0358108	9.36261	1.84446	0.174429	-0.00574852	9.36261	0.0475289	0.82742	0.0166438	-0.00249865	0.195893	0.836301
Apold1	0.249958	7.0384	29.6189	5.25884e-08	0.0765191	7.0384	2.77668	0.0956462	-0.0865397	0.0269825	0	0.112975
Apom	0.0890977	7.16865	1.60786	0.204794	0.0149178	7.16865	0.0449844	0.832033	-0.0273559	0.00382271	0.227588	0.840681
App	0.11824	9.94107	1.62781	0.202006	-0.00441912	9.94107	0.00227356	0.96197	-0.0360844	-0.00201923	0.224625	0.963949
Appl2	0.130716	6.25657	4.20947	0.0401988	0.0227566	6.25657	0.127568	0.720967	-0.0401635	0.00730164	0.0501207	0.734174
Aprt	0.106888	5.64081	2.93603	0.0866233	-0.0110731	5.64081	0.0314436	0.859254	-0.0287961	8.91747e-05	0.102337	0.866865
Aqr	-0.579712	5.32708	75.3864	3.87038e-18	0.0416648	5.32708	0.387984	0.533361	0.202259	0.0143392	0	0.554305
Arap1	-0.162128	5.81879	6.55323	0.0104694	0.0441523	5.81879	0.485897	0.485763	0.0599167	0.0142032	0.014276	0.508663
Arap2	-8.80936	3.81897	1033.53	9.26039e-227	-0.0345692	3.81897	5.88864e-10	0.999981	1	0	0	0.999775
Arap3	-0.11159	5.19825	1.53752	0.214988	-0.0338696	5.19825	0.142032	0.706269	0.0403494	-0.0140199	0.238255	0.719902
Arcn1	2.35332	8.14233	2703.99	0	-0.0678326	8.14233	2.34043	0.126055	-0.669771	-0.0132659	0	0.14646
Arf1	0.0145927	7.26529	0.142704	0.705608	0.00278729	7.26529	0.00520735	0.942473	-0.000650834	0.000459654	0.720039	0.945836
Arf5	-0.580559	6.64543	138.859	4.72933e-32	-0.00541116	6.64543	0.0120207	0.912696	0.202638	-0.00197277	0	0.917975
Arf6	-0.885508	7.7106	7.10818	0.00767328	0.0336422	7.7106	0.0100709	0.920063	0.250313	0.000669103	0.0106564	0.924855
Arfgap1	-0.0868959	6.91167	3.12607	0.0770493	-0.0155319	6.91167	0.0998779	0.751976	0.0339387	-0.005505	0.0918872	0.76386
Arfgap3	0.0411397	6.46247	0.375583	0.539976	-0.101546	6.46247	2.28847	0.130338	-0.00996866	-0.0357863	0.560453	0.150687
Arfgef1	-0.00929552	7.3759	0.0454481	0.831182	0.00330666	7.3759	0.00575031	0.939554	0.00731274	0.000852377	0.839909	0.94319
Arfip1	0.0327623	4.29785	0.130576	0.717836	0.0963964	4.29785	1.13113	0.287535	-0.00638397	0.0316123	0.731757	0.311976
Arfip2	-0.166826	5.70762	5.66784	0.0172787	0.0171849	5.70762	0.0601035	0.806332	0.0614979	0.00632644	0.0229852	0.816363
Arhgap1	0.156972	5.8783	3.52151	0.0605773	-0.0898296	5.8783	1.15294	0.282934	-0.0490996	-0.0298144	0.0734151	0.307314
Arhgap11a	0.689928	5.11968	72.2638	1.88274e-17	0.0864896	5.11968	1.13257	0.287228	-0.226983	0.0326919	0	0.311697
Arhgap12	-0.0578632	6.92515	1.76593	0.183887	-0.0366311	6.92515	0.707746	0.400193	0.0237294	-0.0127127	0.205931	0.424248
Arhgap15	0.252505	5.64953	15.9964	6.34615e-05	-0.00648175	5.64953	0.0106225	0.917911	-0.086878	-0.00395656	0.000114544	0.922809
Arhgap19	0.78159	5.65746	94.8517	2.05194e-22	0.0883469	5.65746	1.21303	0.270732	-0.255421	0.0301512	0	0.295375
Arhgap23	-3.57045	2.78593	217.094	3.89339e-49	-0.0871047	2.78593	0.151478	0.697127	0.846767	-0.00633888	0	0.711555
Arhgap25	0.20138	5.14128	1.74992	0.185886	0.159705	5.14128	1.10012	0.294239	-0.0601723	0.0541925	0.207989	0.318742
Arhgap26	-0.26288	5.21991	10.5829	0.0011414	0.0193507	5.21991	0.057237	0.810917	0.093552	0.00513964	0.00181743	0.820647
Arhgap28	0.120165	6.17758	5.02643	0.0249633	-0.0312886	6.17758	0.34046	0.559564	-0.0408465	-0.00892811	0.0323167	0.579738
Arhgap29	-0.0881083	10.1443	10.0108	0.00155626	0.00403062	10.1443	0.0209518	0.88491	0.0345412	0.000964076	0.0024207	0.891195
Arhgap30	-0.0350628	7.01549	0.659496	0.416738	0.0847113	7.01549	3.84953	0.0497598	0.015065	0.0311079	0.440376	0.0612238
Arhgap32	-0.173555	5.97293	8.55776	0.00344052	-0.067883	5.97293	1.30904	0.252569	0.0629702	-0.0231412	0.0051583	0.277323
Arhgap39	-0.0150804	3.89777	0.0171643	0.895765	0.0234377	3.89777	0.0412245	0.839105	0.0204701	0.0184444	0.901374	0.847488
Arhgap44	-0.125056	4.29522	0.988296	0.320159	0.0294628	4.29522	0.0546936	0.815089	0.0492213	0.00894648	0.34393	0.82458
Arhgap5	-0.245756	5.822	19.1047	1.23743e-05	-0.098593	5.822	3.0744	0.0795338	0.085882	-0.0350735	2.67269e-05	0.0953846
Arhgap9	0.130028	5.7284	1.79465	0.18036	-0.0157495	5.7284	0.0266369	0.870355	-0.031406	-0.00831194	0.202296	0.877396
Arhgdia	-0.0569015	7.28186	1.99619	0.157695	0.0227569	7.28186	0.319334	0.572008	0.0238949	0.00841567	0.17799	0.591662
Arhgdib	0.362384	6.75819	45.9225	1.23028e-11	0.0482262	6.75819	0.812701	0.367323	-0.122524	0.0136908	0	0.391798
Arhgef1	-0.135944	4.48117	1.50792	0.219457	-0.0473377	4.48117	0.182889	0.668902	0.0456209	-0.0126921	0.24286	0.684492
Arhgef12	0.141934	9.30849	25.5556	4.29808e-07	0.00168235	9.30849	0.00359124	0.952214	-0.0452248	0.000403633	3.81813e-06	0.9549
Arhgef15	-0.415586	6.344	39.8111	2.79746e-10	0.036897	6.344	0.314152	0.575143	0.145677	0.010858	0	0.594747
Arhgef17	0.0606476	6.08937	0.858679	0.354109	0.0233422	6.08937	0.127112	0.721445	-0.0156787	0.005053	0.377953	0.734636
Arhgef2	-0.0370562	7.37024	0.699966	0.402795	-0.00274116	7.37024	0.00383042	0.95065	0.016591	-0.00150986	0.426344	0.953438
Arhgef28	-0.221869	6.70433	13.9265	0.000190097	0.0370375	6.70433	0.388237	0.533228	0.0792771	0.0130055	0.000293996	0.554176
Arhgef37	3.4202	7.88634	1641.79	0	-0.100337	7.88634	1.59582	0.206496	-0.823203	-0.0120689	0	0.230497
Arhgef40	-1.50787	3.15346	87.5575	8.18663e-21	-0.014838	3.15346	0.0085044	0.926524	0.472947	-0.00224242	0	0.930892
Arhgef7	0.304262	6.80979	35.8673	2.11219e-09	0.0418239	6.80979	0.678065	0.410254	-0.101129	0.0139019	0	0.433946
Arid1a	0.0886735	5.0545	1.24162	0.265159	-0.00623497	5.0545	0.00609468	0.937774	-0.0313648	-0.000340213	0.28914	0.941399
Arid4a	-0.071694	6.72879	2.68026	0.101599	-0.0227105	6.72879	0.268932	0.604049	0.0280516	-0.0081172	0.118607	0.622806
Arid5b	0.0913164	5.7581	2.46392	0.116488	0.0308025	5.7581	0.280174	0.596587	-0.029333	0.00826845	0.134795	0.615487
Arl1	0.0189829	7.62166	0.213571	0.643983	-0.0533058	7.62166	1.68442	0.194338	-0.00135189	-0.0179709	0.660873	0.218096
Arl15	0.0568144	5.56452	0.598875	0.439007	0.113063	5.56452	2.372	0.123528	-0.0154916	0.0393008	0.462029	0.143573
Arl4c	-0.0536916	4.75549	0.330646	0.565279	0.106434	4.75549	1.29754	0.254663	0.0217114	0.0363943	0.585064	0.279522
Arl4d	-0.404162	4.8219	31.5778	1.91609e-08	0.0671248	4.8219	0.867275	0.351711	0.14684	0.0301851	0	0.376407
Arl5a	-0.254069	5.79455	15.2802	9.26832e-05	0.0909393	5.79455	1.95871	0.161651	0.0971188	0.0374368	0.000152725	0.183503
Arl6	0.0929235	5.85317	2.01868	0.155375	0.0544389	5.85317	0.693141	0.405098	-0.0266644	0.0193073	0.175501	0.429002
Armc1	0.0802867	7.13194	4.79602	0.0285256	0.0159366	7.13194	0.188969	0.663776	-0.0246941	0.00518101	0.0366083	0.679636
Armc10	0.809525	7.47997	310.683	1.55026e-69	0.0193806	7.47997	0.179115	0.672135	-0.268525	0.00638786	0	0.687562
Armc7	-0.222896	3.77908	3.47234	0.062403	0.0208966	3.77908	0.0306567	0.861009	0.0758506	0.0073162	0.0754616	0.868423
Armc8	-0.253711	5.17603	16.0591	6.13973e-05	-0.0769926	5.17603	1.4773	0.224197	0.0935683	-0.0267912	0.000110726	0.248648
Armc9	-0.00236704	4.45422	0.00045517	0.982979	-0.0795575	4.45422	0.528925	0.467059	0.00427787	-0.0262404	0.984281	0.489974
Arntl	-0.194315	5.28591	1.36164	0.243253	0.0755498	5.28591	0.209189	0.647404	0.0704302	0.032649	0.266922	0.66397
Arntl2	-1.21557	4.33049	102.361	4.62807e-24	-0.0640179	4.33049	0.285099	0.593378	0.394308	-0.0237034	0	0.612288
Arpc1b	8.66581	10.0721	4952.59	0	-0.113391	10.0721	1.00634	0.315782	-0.995001	-0.000586747	0	0.340161
Arpc2	0.0403739	6.21424	0.627893	0.428129	-0.00140816	6.21424	0.000762966	0.977964	-0.0130215	-0.00185666	0.451544	0.979184
Arpc4	-0.0840843	7.80655	5.20888	0.0224718	0.0323159	7.80655	0.769535	0.380361	0.0325535	0.0118348	0.0293385	0.404543
Arpc5	0.055043	8.82613	4.07352	0.0435605	0.0208872	8.82613	0.586582	0.443744	-0.0151546	0.0074912	0.0539617	0.466977
Arpp19	1.78187	6.545	1088.35	1.12535e-238	0.022285	6.545	0.170057	0.680062	-0.544737	0.00570384	0	0.695103
Arrb1	0.0505053	7.87577	2.06046	0.151165	-0.00978818	7.87577	0.0773835	0.780875	-0.0135268	-0.0033883	0.171117	0.792019
Arrb2	-0.139334	7.59253	9.81394	0.00173194	0.0307485	7.59253	0.478046	0.489309	0.0517096	0.010119	0.00263069	0.511813
Arrdc3	0.264237	5.6035	17.8736	2.36075e-05	0.0788898	5.6035	1.59208	0.207029	-0.0862827	0.0282039	6.10902e-05	0.230993
Arrdc4	0.19793	5.2647	7.05877	0.00788783	-0.108628	5.2647	2.12487	0.144925	-0.0681364	-0.0367144	0.0109428	0.16599
Arsb	0.558226	5.13193	53.4099	2.70735e-13	-0.0485255	5.13193	0.401535	0.526298	-0.188181	-0.0139617	0	0.547547
Arsg	-0.287133	3.98781	3.5229	0.0605266	-0.0391956	3.98781	0.0658085	0.79754	0.0952082	-0.0112152	0.0733693	0.808108
Arsj	1.52213	3.89215	170.764	5.03736e-39	-0.259893	3.89215	4.9177	0.0265828	-0.4727	-0.0678619	0	0.0343518
Arsk	0.775375	6.18538	202.346	6.425e-46	0.0700364	6.18538	1.64936	0.199045	-0.258598	0.0230746	0	0.222991
Art3	0.0111899	7.6084	0.052822	0.818224	0.0555156	7.6084	1.30277	0.253708	0.00231433	0.0196152	0.827405	0.278567
Asap1	-0.100643	7.55732	5.17115	0.022965	0.0535932	7.55732	1.46626	0.225937	0.0398088	0.0182493	0.0299036	0.250344
Asap2	-0.597616	4.28661	27.1271	1.90507e-07	0.121681	4.28661	1.1206	0.28979	0.2004	0.0389704	3.81813e-06	0.314164
Asap3	0.401113	4.80468	20.5529	5.80066e-06	0.0807399	4.80468	0.832932	0.361426	-0.131285	0.0309871	1.14544e-05	0.386113
Asb1	-0.0447107	6.48859	0.739902	0.389692	0.0172786	6.48859	0.110581	0.739484	0.0179301	0.00680609	0.413252	0.751871
Asb13	-0.302851	5.89167	17.5592	2.785e-05	-0.0112842	5.89167	0.0244489	0.875748	0.108181	-0.00534583	7.25446e-05	0.882459
Asb3	-0.481189	4.40519	17.4191	2.99799e-05	-0.0364473	4.40519	0.100375	0.751381	0.163517	-0.0162359	7.25446e-05	0.76331
Ascc1	0.349634	5.47113	25.9266	3.54646e-07	-0.0909816	5.47113	1.75408	0.185364	-0.117716	-0.0309443	3.81813e-06	0.208665
Ascc2	0.365414	5.65148	23.7203	1.11401e-06	-0.08923	5.65148	1.41432	0.23434	-0.12221	-0.0321132	7.63627e-06	0.259022
Ascc3	0.0717318	5.98804	1.43184	0.231465	-0.0383351	5.98804	0.408643	0.522659	-0.0218566	-0.0111797	0.254906	0.543939
Ash1l	0.0129462	6.94811	0.0820234	0.774574	-0.0775995	6.94811	2.94842	0.0859613	0.000234001	-0.0268521	0.785589	0.102483
Asns	-0.393129	6.53318	40.188	2.30662e-10	0.0614897	6.53318	0.984559	0.321076	0.137474	0.0225241	0	0.345453
Asnsd1	0.143426	4.58303	2.04123	0.153086	-0.0672616	4.58303	0.449469	0.502587	-0.0487897	-0.0272071	0.172969	0.524906
Asph	-0.38737	9.838	160.666	8.09387e-37	-0.0163741	9.838	0.287695	0.591701	0.136609	-0.00559449	0	0.610596
Aspn	0.0793383	4.83983	0.756096	0.384553	0.00654446	4.83983	0.00523816	0.942303	-0.00839478	0.0147786	0.408239	0.945706
Asrgl1	0.588128	4.02466	30.6115	3.15222e-08	0.0893386	4.02466	0.704872	0.401151	-0.19289	0.02961	0	0.42513
Asun	-0.0815424	6.4986	2.2598	0.132771	-0.069568	6.4986	1.6447	0.199682	0.0320286	-0.0233923	0.151721	0.223636
Atad2	0.164058	6.33204	9.47857	0.00207886	-0.0454215	6.33204	0.726819	0.393916	-0.0524881	-0.0170673	0.00318051	0.417895
Atad2b	0.307629	4.26321	0.624993	0.429198	0.518364	4.26321	1.75384	0.185394	-0.0873406	0.136196	0.452579	0.208692
Atad3a	-7.90529	4.65807	108.259	2.35852e-25	-0.0653817	4.65807	0.0394448	0.84257	0.962146	0.0177731	0	0.850898
Atad5	-0.168818	4.30331	2.43135	0.118931	-0.0395665	4.30331	0.133458	0.714874	0.0595226	-0.0124143	0.137312	0.728248
Atat1	-0.378571	4.941	8.06707	0.00450769	-0.388627	4.941	8.49212	0.00356689	0.128902	-0.125882	0.00648319	0.00521557
Ate1	8.11614	3.79333	1053.01	5.40347e-231	0.698092	3.79333	4.15083	0.0416142	-0.996463	0.003537	0	0.0520755
Atf1	0.0296769	5.2677	0.179454	0.671843	0.0697803	5.2677	0.991983	0.319258	-0.00709898	0.0252414	0.687703	0.343609
Atf2	0.00801285	4.4057	0.00978176	0.921215	-0.054772	4.4057	0.458265	0.498436	0.00406334	-0.0206776	0.925195	0.520713
Atf4	0.0675956	6.92077	3.78944	0.0515768	-0.00561321	6.92077	0.0261566	0.871519	-0.0196619	-0.00364329	0.0634459	0.878499
Atf5	0.161687	7.24591	13.4029	0.000251233	0.0141718	7.24591	0.103063	0.748184	-0.0508491	0.0062367	0.000427631	0.760263
Atf6	-0.17944	7.49054	20.4906	5.99257e-06	0.00452835	7.49054	0.013057	0.909026	0.0661695	0.00168687	1.14544e-05	0.914447
Atf6b	-0.11146	6.71032	4.11335	0.0425459	0.0159066	6.71032	0.0837608	0.772264	0.0430446	0.00594977	0.0528163	0.783687
Atf7ip	0.0338122	7.67631	0.726834	0.393911	0.036223	7.67631	0.834096	0.361091	-0.00755229	0.0121292	0.417547	0.385735
Atg12	-0.0423892	5.29546	0.43179	0.511112	-0.0386934	5.29546	0.359419	0.548829	0.0229466	-0.00914574	0.532263	0.569295
Atg16l1	-0.128666	5.50481	5.0449	0.0246986	-0.0349488	5.50481	0.372211	0.541801	0.0487676	-0.0138285	0.031996	0.562415
Atg3	0.0872798	6.42944	2.81989	0.093103	0.0368199	6.42944	0.501867	0.478681	-0.0270415	0.0129455	0.109424	0.501615
Atg4a-ps	-2.40512	5.55621	1041	2.20527e-228	-0.107126	5.55621	1.9834	0.159033	0.683267	-0.0212092	0	0.180655
Atg4b	-0.0272029	5.94859	0.164483	0.685062	-0.0844993	5.94859	1.58656	0.207819	0.0143095	-0.029145	0.70057	0.231803
Atg4c	0.288763	5.28568	19.0729	1.25821e-05	-0.134263	5.28568	4.12188	0.042332	-0.0937193	-0.0431659	2.67269e-05	0.0529117
Atg7	0.37891	6.21847	35.5145	2.53164e-09	-0.00582735	6.21847	0.00842821	0.926853	-0.126046	-0.00263078	0	0.931235
Atg9a	0.137896	5.04122	2.04167	0.153042	0.0554456	5.04122	0.33042	0.565412	-0.042092	0.0195916	0.172927	0.585373
Atic	-0.0575572	7.58711	2.43874	0.118371	0.0312039	7.58711	0.716778	0.397203	0.0236075	0.0105488	0.136785	0.421178
Atl3	3.46696	5.31375	957.248	3.52582e-210	0.00311433	5.31375	0.000454527	0.982991	-0.828772	0.00180194	0	0.983811
Atm	0.156058	4.49346	1.83539	0.175492	-0.0845091	4.49346	0.537717	0.463381	-0.050787	-0.0270391	0.197218	0.486323
Atmin	-0.0478623	5.94486	0.668359	0.413624	0.0148789	5.94486	0.0645532	0.799439	0.0214469	0.00460976	0.437226	0.809884
Atp10a	-0.0946279	6.62739	2.9339	0.0867378	0.0174541	6.62739	0.0996943	0.752197	0.0404037	0.00642164	0.102444	0.764089
Atp10d	-2.02484	3.97595	185.88	2.52109e-42	-0.281675	3.97595	3.59947	0.0577982	0.592498	-0.0583932	0	0.070456
Atp11a	0.144669	9.43745	25.5367	4.34051e-07	-0.0144113	9.43745	0.253451	0.614655	-0.0467873	-0.00537105	3.81813e-06	0.632986
Atp11b	-8.0828	3.64714	939.369	2.71376e-206	0.325794	3.64714	2.30628	0.128852	0.997778	0.00222222	0	0.149262
Atp13a3	0.0111394	8.307	0.113758	0.735906	-0.0418061	8.307	1.60228	0.205581	-0.000326767	-0.0149554	0.74895	0.229565
Atp1a1	-0.0738583	7.61843	3.10035	0.0782752	-0.0395891	7.61843	0.890785	0.345265	0.0299506	-0.0144299	0.0932618	0.369576
Atp1a2	-0.293064	8.14929	85.0602	2.89416e-20	0.0110047	8.14929	0.119981	0.729056	0.105177	0.00325333	0	0.741967
Atp1a3	0.0180085	5.06839	0.0387839	0.843877	-0.0692863	5.06839	0.575666	0.448016	-0.00217567	-0.0278608	0.851963	0.471234
Atp1b2	-0.264111	3.54795	3.75728	0.0525782	-0.0312506	3.54795	0.0523606	0.819005	0.0811554	-0.0123423	0.0644654	0.828386
Atp1b3	0.123583	9.21431	20.5287	5.87453e-06	-0.0309866	9.21431	1.29077	0.255906	-0.0392898	-0.0110393	1.14544e-05	0.280778
Atp2b1	-1.08267	5.12733	163.005	2.49509e-37	0.0941322	5.12733	1.23655	0.266138	0.360407	0.0321573	0	0.290793
Atp2b4	-0.133214	7.20569	10.7754	0.00102857	-0.0238193	7.20569	0.344501	0.557242	0.0503661	-0.00761627	0.0016418	0.577451
Atp2c1	-0.6644	3.08385	17.3869	3.04927e-05	0.102712	3.08385	0.424753	0.514575	0.221873	0.037756	7.25446e-05	0.536379
Atp5b	0.0322529	12.2087	3.77617	0.0519876	-0.0014924	12.2087	0.0080853	0.928352	-0.00732068	-0.000773834	0.0638316	0.932591
Atp5e	0.569828	8.82501	282.758	1.88207e-63	-0.0122425	8.82501	0.130997	0.7174	-0.190794	-0.00410555	0	0.730646
Atp5g1	-0.497076	6.59057	76.1628	2.61213e-18	0.0190489	6.59057	0.112129	0.737733	0.172894	0.00433542	0	0.750176
Atp5g3	0.088977	3.35496	0.578384	0.446946	-0.150241	3.35496	1.65106	0.198815	-0.0207972	-0.0523702	0.469547	0.222781
Atp5j	1.87325	8.78778	2677.37	0	-0.00216097	8.78778	0.00367698	0.951647	-0.567594	-0.000309023	0	0.954415
Atp5s	-0.0722546	4.30549	0.67013	0.413006	-0.074962	4.30549	0.720766	0.395893	0.0303683	-0.025257	0.436573	0.419808
Atp5sl	0.378941	4.97676	21.2801	3.96834e-06	-0.100287	4.97676	1.48859	0.222436	-0.125457	-0.0341831	1.14544e-05	0.246984
Atp6v0a1	-0.0627871	7.06284	1.8002	0.179689	-0.0145385	7.06284	0.0965548	0.756004	0.0269735	-0.00657288	0.201659	0.767777
Atp6v0a4	-1.16488	4.56038	86.6451	1.2985e-20	0.0838508	4.56038	0.446724	0.503895	0.383638	0.0289447	0	0.526105
Atp6v0b	0.00324588	8.49829	0.0110449	0.916301	0.0120807	8.49829	0.153057	0.695631	0.00307884	0.00423546	0.920632	0.710139
Atp6v0e	-0.0763967	9.35374	5.502	0.0189947	0.0132135	9.35374	0.164643	0.684917	0.0302034	0.00458714	0.0251577	0.699887
Atp6v1b2	0.26371	8.43881	5.22515	0.0222625	0.0371424	8.43881	0.103637	0.747508	-0.0833611	0.0124078	0.0291018	0.75958
Atp6v1g1	0.0860729	6.92975	3.45859	0.0629238	0.0829818	6.92975	3.21472	0.0729787	-0.0244427	0.0282548	0.0759962	0.0880538
Atp6v1g2	0.137746	7.35673	5.15296	0.0232068	-0.000525889	7.35673	7.70945e-05	0.992994	-0.0437111	-0.00118465	0.0301442	0.993238
Atp6v1h	-0.0589827	6.2775	1.32525	0.249652	-0.0248557	6.2775	0.235304	0.627619	0.02517	-0.00883608	0.273222	0.645169
Atp8a1	-0.142119	6.90029	10.6931	0.00107533	0.00638841	6.90029	0.021612	0.883124	0.0523123	0.00222294	0.00172198	0.889423
Atp8b1	-0.19232	6.60307	9.98995	0.00157397	0.0901857	6.60307	2.1969	0.138288	0.0696196	0.0297064	0.00243597	0.15896
Atp8b2	-0.309176	5.89668	17.4499	2.94976e-05	0.0839529	5.89668	1.2874	0.256528	0.11015	0.0292223	7.25446e-05	0.281416
Atp8b5	0.0206655	3.78499	0.00691573	0.933724	0.249685	3.78499	1.07458	0.299914	-0.00302351	0.0760347	0.93752	0.324225
Atp9b	-0.0492019	5.89617	0.426857	0.513535	-0.0545274	5.89617	0.52492	0.468751	0.0179295	-0.0212364	0.534535	0.491684
Atpaf1	-0.274723	4.9444	12.7206	0.000361644	-0.0111337	4.9444	0.0209306	0.884968	0.0978141	-0.00542888	0.000591811	0.89124
Atpaf2	-0.104205	4.15948	1.3894	0.238507	0.194357	4.15948	4.83582	0.0278744	0.0397135	0.0652566	0.261924	0.0359286
Atpbd4	0.105339	2.7106	0.369305	0.543383	0.446212	2.7106	6.64172	0.00996176	-0.0353349	0.146097	0.563893	0.0134818
Atpif1	0.314841	7.169	45.5769	1.46759e-11	0.0449358	7.169	0.929131	0.335089	-0.103994	0.0161918	0	0.359538
Atr	-0.395152	6.32632	40.8489	1.64465e-10	0.0151541	6.32632	0.0600631	0.806396	0.140721	0.00578542	0	0.816443
Atrnl1	-0.150611	9.3637	29.8424	4.68631e-08	0.0126441	9.3637	0.210392	0.64646	0.0559113	0.00413453	0	0.663134
Atxn2	0.0374551	3.53511	0.149387	0.699122	-0.12317	3.53511	1.61606	0.203642	-0.0140192	-0.0388452	0.713846	0.227664
Atxn3	-0.0223255	4.37953	0.0724587	0.78779	0.0427149	4.37953	0.265318	0.60649	0.0134464	0.0130961	0.798307	0.62525
Atxn7	-0.438967	3.81712	12.7618	0.000353779	-0.0759029	3.81712	0.381624	0.536735	0.141824	-0.0285	0.00057272	0.557604
Atxn7l3	0.0509962	5.93828	0.85195	0.356001	0.0894756	5.93828	2.62252	0.105357	-0.013208	0.0298771	0.379965	0.123505
AU015336	-1.59022	2.93448	66.8816	2.88314e-16	0.285503	2.93448	2.08965	0.1483	0.481208	0.0624908	0	0.169422
AU021092	0.330735	5.01845	8.29783	0.00396925	0.111182	5.01845	0.939936	0.332294	-0.110584	0.0403728	0.00583029	0.356763
AU022252	-0.0576406	4.70359	0.64178	0.423067	0.124838	4.70359	3.01161	0.08267	0.0237791	0.0421845	0.446829	0.0988057
Auh	0.164869	7.35897	11.8671	0.000571341	0.0360414	7.35897	0.567323	0.451325	-0.0527455	0.0124537	0.000973624	0.474487
Aurkaip1	0.000380087	7.42989	0.000113409	0.991503	0.04296	7.42989	1.45325	0.228007	0.00396666	0.0143649	0.992215	0.252417
Auts2	0.0652766	3.17702	0.189401	0.663415	-0.0398859	3.17702	0.0709605	0.789943	-0.0183032	-0.0117341	0.679475	0.800796
AUTS2	0.0173648	3.02379	0.0122888	0.911731	-0.0377783	3.02379	0.0576522	0.810246	-0.00332592	-0.00938775	0.916345	0.820017
AV039307	0.0985847	4.54906	1.47735	0.22419	-0.151951	4.54906	3.51116	0.0609566	-0.0301316	-0.0549467	0.24748	0.0741978
Aven	0.218808	4.80135	3.33801	0.0676964	0.125408	4.80135	1.0975	0.294815	-0.070895	0.0422706	0.0813721	0.319292
AW146154	0.279905	3.17761	2.26987	0.131911	-0.154554	3.17761	0.69487	0.404513	-0.0901683	-0.0472687	0.150896	0.428418
AW554918	-0.311221	3.99107	5.77296	0.0162746	0.0650986	3.99107	0.252477	0.615336	0.11257	0.0264841	0.0217595	0.633635
Axin1	0.364832	5.45358	35.1029	3.12734e-09	0.0633102	5.45358	1.05634	0.304052	-0.121355	0.0217285	0	0.328417
Axin2	-0.0121036	5.74623	0.044718	0.832523	0.0388316	5.74623	0.460139	0.497559	0.00999033	0.0136461	0.841307	0.5199
AY036118	2.75533	9.83801	974.407	6.56799e-214	-0.147712	9.83801	3.14399	0.0762072	-0.73202	-0.0221448	0	0.0916238
Azi2	1.67917	3.58689	146.775	8.79058e-34	0.128268	3.58689	0.842602	0.358654	-0.509325	0.0308171	0	0.383249
Azin1	-0.101863	4.80986	1.37393	0.241138	0.0101548	4.80986	0.0136813	0.906886	0.0373946	0.00250192	0.264685	0.912236
B230118H07Rik	-0.166601	7.18925	13.615	0.000224389	-0.0493198	7.18925	1.19343	0.274639	0.0607653	-0.0172894	0.000355087	0.299067
B230120H23Rik	-0.0915806	7.64077	5.00588	0.0252613	0.0330125	7.64077	0.650561	0.419912	0.0348839	0.0113934	0.0326794	0.443736
B230206L02Rik	-1.75191	4.87404	152.289	5.4796e-35	-0.0585296	4.87404	0.175597	0.675185	0.523613	-0.017578	0	0.690452
B230216N24Rik	0.0459042	5.28632	0.195747	0.658176	-0.317151	5.28632	9.34241	0.0022391	-0.0136551	-0.109747	0.674496	0.00329123
B2m	0.189408	13.8531	109.62	1.18712e-25	0.00673517	13.8531	0.138696	0.70958	-0.0617346	0.00204856	0	0.723189
B3galnt1	0.10285	5.38509	2.5517	0.110175	0.0250859	5.38509	0.151743	0.696876	-0.0301251	0.00984346	0.1279	0.711349
B3galt2	0.271993	8.61965	59.4168	1.27578e-14	0.00874962	8.61965	0.0615564	0.804053	-0.0898634	0.00277882	0	0.814206
B3galt4	-0.90188	3.9554	61.3178	4.85666e-15	-0.296724	3.9554	6.62775	0.0100402	0.298285	-0.0917448	0	0.0135887
B3galt6	0.0361779	5.16205	0.301201	0.58313	-0.0859124	5.16205	1.69852	0.192481	-0.0111225	-0.0309153	0.601933	0.216129
B3galtl	-0.0199673	7.63357	0.246063	0.619861	0.026569	7.63357	0.435743	0.509184	0.0102043	0.00864921	0.637793	0.531125
B3gnt1	0.0560893	5.9195	1.28431	0.257099	0.0237732	5.9195	0.230743	0.630973	-0.0155167	0.00827408	0.280919	0.648323
B3gnt2	-0.0094472	4.32407	0.00731508	0.931841	-0.105073	4.32407	0.908078	0.340625	0.00505069	-0.0386854	0.935577	0.364773
B4galnt1	-0.244211	3.70217	3.03663	0.0814047	0.145338	3.70217	1.08005	0.298687	0.0798337	0.050671	0.0968279	0.32298
B4galnt2	-6.6319	4.12877	73.0406	1.27007e-17	0.0808332	4.12877	0.0614829	0.804167	0.885717	-0.010351	0	0.814332
B4galt1	0.00543357	4.39856	0.0049281	0.944034	0.0297578	4.39856	0.147394	0.701038	0.00144496	0.010744	0.947081	0.715091
B4galt2	0.0909418	3.72468	0.637072	0.424773	-0.201066	3.72468	3.11843	0.0774114	-0.0208442	-0.065781	0.448432	0.0930059
B4galt6	-0.148006	6.08022	6.84131	0.00890733	-0.0585882	6.08022	1.07184	0.300531	0.0544717	-0.018618	0.0122638	0.324832
B930094E09Rik	-0.09679	2.88163	0.491928	0.483068	0.052815	2.88163	0.146944	0.701473	0.0397798	0.026327	0.504776	0.715511
B930095G15Rik	0.00627421	3.7748	0.00319549	0.954921	0.118294	3.7748	1.09619	0.295104	-0.00469361	0.0364702	0.957386	0.319498
Bach2	-0.201409	3.45257	2.40599	0.120872	-0.00187207	3.45257	0.000194685	0.988867	0.0722961	0.00284035	0.139293	0.989408
Bag3	0.186641	4.80109	4.25367	0.0391657	-0.148376	4.80109	2.69017	0.100969	-0.0562252	-0.0532041	0.0488454	0.118901
Bag5	0.0806429	5.74356	2.24016	0.134467	0.0633503	5.74356	1.38208	0.239746	-0.0236792	0.0197464	0.153588	0.26457
Bag6	0.1084	9.49467	3.4456	0.0634203	0.0107711	9.49467	0.0339972	0.853713	-0.0333961	0.00342623	0.0765651	0.861608
Bahd1	0.115518	5.51186	3.38311	0.0658678	-0.0233243	5.51186	0.13795	0.710327	-0.0377376	-0.00996601	0.0793027	0.723941
Bai2	-0.541235	3.33154	8.22811	0.00412464	0.0326633	3.33154	0.0268651	0.869805	0.187436	0.0145953	0.00600211	0.876896
Baiap3	0.122915	3.99594	0.746185	0.387687	0.0781063	3.99594	0.30146	0.582968	-0.0437009	0.0317032	0.411247	0.602162
Bak1	0.996414	4.17244	68.6612	1.16921e-16	0.315266	4.17244	6.88409	0.00869663	-0.315904	0.0988175	0	0.0118591
Banp	0.0499512	5.18584	0.400404	0.526881	-0.0883771	5.18584	1.25276	0.263026	-0.0148028	-0.0304321	0.547444	0.28778
Bard1	-0.140363	3.28393	0.770247	0.380141	0.0289936	3.28393	0.0325457	0.856835	0.0436027	0.00917079	0.403752	0.86459
Batf3	0.943562	3.45731	35.8423	2.13954e-09	-0.121473	3.45731	0.593203	0.441183	-0.310652	-0.0338891	0	0.464442
Baz1a	-0.00760323	5.59671	0.0132589	0.908329	-0.0239354	5.59671	0.131323	0.717065	0.00694724	-0.00831631	0.913271	0.730352
Baz2a	0.115108	7.68905	8.24076	0.00409599	-0.0154373	7.68905	0.14828	0.700185	-0.0352084	-0.00660377	0.00596774	0.714354
Bbc3	-0.193144	3.98686	3.63147	0.0566968	-0.234733	3.98686	5.36351	0.0205624	0.0726166	-0.0852322	0.0690395	0.0269369
Bbs10	-0.191241	4.56125	5.49941	0.0190229	-0.0329626	4.56125	0.163632	0.685835	0.0684274	-0.0140946	0.0252035	0.700765
Bbs7	0.193179	4.77973	3.85196	0.0496879	-0.0572868	4.77973	0.338695	0.560584	-0.0658018	-0.0213063	0.061094	0.580746
Bbx	-0.0882536	5.78359	1.44946	0.228614	-0.0371395	5.78359	0.256877	0.612274	0.0322906	-0.0141017	0.251943	0.630744
BC003331	-0.0983913	8.7738	11.7672	0.000602839	-0.00583194	8.7738	0.0413381	0.838887	0.0377557	-0.00231597	0.00101181	0.847332
BC003965	0.111154	5.7228	4.22741	0.0397761	0.0527046	5.7228	0.950316	0.329639	-0.033771	0.0171637	0.0495518	0.354143
BC004004	0.00974411	7.15749	0.0544713	0.815458	-0.0334983	7.15749	0.643862	0.422316	0.00155681	-0.0108732	0.824717	0.446138
BC005537	0.0142746	7.39776	0.132842	0.715504	-0.0171156	7.39776	0.191012	0.662076	-0.00185829	-0.00666905	0.729508	0.678089
BC005764	8.00775	3.36115	868.054	8.64069e-191	-0.285434	3.36115	1.38389	0.23944	-0.998413	-0.0015873	0	0.264329
BC016423	-0.143438	7.18688	12.8547	0.000336627	0.0117094	7.18688	0.0856988	0.769718	0.053144	0.00410484	0.000542175	0.781206
BC018507	0.448734	7.17907	147.568	5.89608e-34	0.0087297	7.17907	0.0558548	0.813172	-0.150993	0.00276969	0	0.822808
BC023719	0.00626758	6.92143	0.000398309	0.984077	0.193289	6.92143	0.4535	0.500678	0.00472384	0.0535415	0.985254	0.522852
BC026585	0.73465	6.49466	166.637	4.01488e-38	0.0802173	6.49466	1.99178	0.158155	-0.245425	0.0247867	0	0.179731
BC029722	0.656017	6.9432	227.29	2.32421e-51	0.00129939	6.9432	0.000916911	0.975843	-0.2185	0.00106763	0	0.977171
BC033916	-2.87349	4.2692	148.009	4.72356e-34	-0.265702	4.2692	1.3198	0.250628	0.720176	-0.0478816	0	0.275406
BC034902	-7.53589	4.25791	835.978	8.12653e-184	0.759398	4.25791	4.73161	0.0296131	0.992234	0.00625979	0	0.037979
BC039771	0.438468	5.12482	14.5594	0.000135808	-0.0571294	5.12482	0.247396	0.618915	-0.143097	-0.019729	0.000209997	0.637025
BC046401	0.0419068	3.68226	0.116469	0.732896	0.00681806	3.68226	0.00309178	0.955657	-0.00927394	0.00542013	0.746109	0.95826
BC048403	0.352631	4.58344	14.2579	0.000159387	-0.0287045	4.58344	0.0943129	0.758764	-0.1158	-0.00754961	0.000244361	0.770538
BC051226	-1.18131	4.62873	144.376	2.94015e-33	0.0932281	4.62873	0.899995	0.342783	0.389937	0.027249	0	0.366938
BC053749	-0.0374766	3.59346	0.059727	0.806928	0.243585	3.59346	2.55812	0.109729	0.0156162	0.0939434	0.816409	0.128499
BC056474	0.202469	3.74071	4.02626	0.044797	0.0453177	3.74071	0.201173	0.653776	-0.0679216	0.0169819	0.0553973	0.670193
BC064078	-0.0877676	4.6585	0.923878	0.336459	0.0998348	4.6585	1.19449	0.274427	0.0371146	0.0376884	0.360367	0.298845
BC067074	-0.129023	5.07392	2.29299	0.129959	0.01257	5.07392	0.0215836	0.8832	0.0544959	-0.000740124	0.148766	0.889488
BC068281	-0.558461	3.05806	9.63653	0.00190745	0.0274561	3.05806	0.0238561	0.877252	0.187455	0.00577405	0.00289033	0.883879
BC096441	-0.439654	6.55711	72.3479	1.80419e-17	-0.00380211	6.55711	0.00543267	0.941244	0.154135	-0.00242293	0	0.944671
BC100451	-0.128149	7.11352	5.83838	0.0156802	0.0134532	7.11352	0.0642762	0.799861	0.0474953	0.00450269	0.0210303	0.810254
Bcar1	-0.219612	6.0211	16.4996	4.866e-05	0.0549485	6.0211	1.0321	0.309666	0.081875	0.018628	9.92715e-05	0.334056
Bcar3	0.135703	8.74928	10.941	0.000940598	-0.0133112	8.74928	0.10523	0.745642	-0.0439909	-0.00410409	0.0015158	0.757739
Bcas3	0.0051944	4.70572	0.00165436	0.967556	0.0149244	4.70572	0.0141366	0.905357	0.00499541	0.00681577	0.969566	0.910755
Bcat1	-0.227668	5.59992	1.07795	0.299157	0.0493874	5.59992	0.0505677	0.822078	0.0743072	0.0124611	0.323331	0.831219
Bcdin3d	0.182879	3.55466	2.72724	0.0986494	0.0897899	3.55466	0.656557	0.417778	-0.0647997	0.0326142	0.115308	0.441521
Bche	-0.754757	6.44518	210.395	1.12623e-47	0.0166401	6.44518	0.10221	0.749193	0.260829	0.00635417	0	0.761153
Bckdhb	-0.41954	7.58772	107.215	3.99454e-25	0.0045555	7.58772	0.0126617	0.910408	0.147261	0.000885443	0	0.915722
Bcl2	-0.0432378	3.90653	0.172653	0.677764	-0.032472	3.90653	0.0971885	0.75523	0.0202337	-0.00984632	0.693381	0.76709
Bcl2a1b	0.449005	4.41984	10.1561	0.00143822	-0.139129	4.41984	0.984626	0.321059	-0.156479	-0.03658	0.00227561	0.345438
Bcl2l11	0.494553	3.00468	10.1985	0.00140555	-0.0132905	3.00468	0.00744531	0.931239	-0.161019	0.000705393	0.00223361	0.935134
Bcl2l13	0.0106698	7.19471	0.0704796	0.79064	0.0439245	7.19471	1.19429	0.274467	-0.000634921	0.0146755	0.800858	0.29888
Bcl2l2	-0.0304165	5.7495	0.308424	0.578649	0.037989	5.7495	0.48098	0.487979	0.0143549	0.0113154	0.597763	0.510634
Bcl6b	0.20714	5.99067	12.5724	0.00039149	0.0227546	5.99067	0.151701	0.696915	-0.0676515	0.00921651	0.000641447	0.711387
Bcl9l	0.0365911	4.33835	0.0757673	0.783118	-0.172551	4.33835	1.68577	0.194159	-0.0113947	-0.059715	0.793966	0.217928
Bclaf1	-1.94838	5.74675	923.844	6.43443e-203	-0.0459346	5.74675	0.500285	0.479375	0.589832	-0.0112587	0	0.50236
Bcs1l	-0.0184296	3.84915	0.0277459	0.867708	-0.0704733	3.84915	0.406163	0.523923	0.0128551	-0.0201437	0.874941	0.545172
Becn1	0.106642	8.2134	10.8461	0.000990056	0.0168255	8.2134	0.269988	0.60334	-0.0328909	0.00536363	0.00156544	0.62215
Bend4	0.621547	4.48785	47.5001	5.50012e-12	-0.0109055	4.48785	0.014692	0.903524	-0.218069	-0.00125546	0	0.908964
Bend7	0.288549	3.61385	6.2967	0.0120963	0.00479712	3.61385	0.00158309	0.968262	-0.107417	-0.0118127	0.0163798	0.970131
Bet1	0.125338	4.30382	1.49988	0.220689	-0.193009	4.30382	3.55388	0.0594065	-0.0408417	-0.0688204	0.244028	0.0722773
Bhlhe41	-0.887081	5.72731	169.838	8.02867e-39	0.0661548	5.72731	0.941947	0.331778	0.298087	0.018288	0	0.356347
Bicc1	-0.028229	6.57256	0.346715	0.555979	0.0188162	6.57256	0.154093	0.694654	0.0121835	0.00714612	0.576153	0.709234
Bid	0.478309	5.6098	57.7576	2.96486e-14	-0.0117322	5.6098	0.0346758	0.852277	-0.1584	-0.00307291	0	0.860378
Bin1	-0.139193	3.77025	1.95212	0.162359	0.137955	3.77025	1.91733	0.166151	0.055484	0.0477631	0.182938	0.188062
Bin2	0.389794	3.9736	6.24451	0.0124579	-0.143553	3.9736	0.855613	0.354969	-0.12258	-0.0645299	0.0169334	0.379687
Birc6	0.00938724	5.64286	0.0174112	0.895023	-0.0196146	5.64286	0.0759196	0.782905	-0.00102204	-0.00698435	0.900717	0.793962
Blcap	0.751783	5.71122	126.272	2.68103e-29	-0.645647	5.71122	93.0452	5.11131e-22	-0.238685	-0.201539	0	0
Blm	0.196024	2.9105	0.848061	0.357101	0.209351	2.9105	0.964853	0.325967	-0.0643314	0.071468	0.381008	0.35044
Blmh	0.0958851	6.71345	4.42279	0.0354621	0.0417812	6.71345	0.839803	0.359453	-0.029563	0.0144503	0.0446302	0.384085
Blnk	0.14099	5.23635	1.43187	0.23146	-0.0623012	5.23635	0.279366	0.597117	-0.0602861	-0.0229657	0.254895	0.615964
Bloc1s1	-0.044394	3.92417	0.119651	0.729414	-0.151244	3.92417	1.39069	0.238289	0.0114197	-0.0543319	0.742673	0.263119
Bloc1s5	-0.145159	5.57414	6.04853	0.0139179	-0.0189162	5.57414	0.102742	0.748563	0.0521954	-0.00822736	0.0187241	0.760649
Bloc1s6	-0.57134	7.64404	89.5947	2.92309e-21	-0.0345581	7.64404	0.329351	0.566041	0.196707	-0.0116908	0	0.5859
Blvra	0.128206	6.66916	5.86524	0.0154428	0.0803478	6.66916	2.30353	0.129081	-0.0401422	0.0275597	0.0207287	0.149507
Blzf1	-0.0229968	5.8239	0.0982998	0.75388	-0.051257	5.8239	0.489397	0.484196	0.00946475	-0.0192839	0.76612	0.507083
Bmf	-0.0099181	5.94686	0.026472	0.870753	-0.0341794	5.94686	0.314259	0.575078	0.00883848	-0.0162557	0.877793	0.594686
Bmp8b	-0.0184362	3.49518	0.0203346	0.886606	-0.112678	3.49518	0.771268	0.379825	-0.00481558	-0.0365533	0.892924	0.404077
Bmpr2	0.229081	6.10543	23.2455	1.4258e-06	0.0354151	6.10543	0.555302	0.456159	-0.0760902	0.00919607	7.63627e-06	0.479157
Bnc1	-0.13448	4.13058	1.39907	0.23688	0.0138488	4.13058	0.0144968	0.904164	0.0477318	-0.0112426	0.260271	0.909617
Bnc2	0.106241	4.4715	1.49843	0.220912	-0.0113921	4.4715	0.0171742	0.895735	-0.0367726	-0.00475326	0.244296	0.901778
Bnip1	0.101632	5.62536	2.57788	0.108367	-0.0506866	5.62536	0.641057	0.423328	-0.0341885	-0.0179495	0.125861	0.447172
Bnip2	0.142789	6.94192	10.1863	0.0014149	0.0184929	6.94192	0.170912	0.679303	-0.044425	0.00704929	0.00224125	0.694305
Bnip3	-0.106328	8.837	12.2809	0.000457611	0.0322036	8.837	1.12673	0.288473	0.0404326	0.0113339	0.000740718	0.312919
Boc	0.0648342	5.71914	0.507503	0.476222	0.0378449	5.71914	0.172956	0.677498	-0.0190067	0.0128496	0.497931	0.692522
Bod1	0.343628	5.82152	44.804	2.17782e-11	0.030497	5.82152	0.352416	0.552749	-0.115551	0.00833035	0	0.573022
Bok	-0.698188	3.98884	34.936	3.40729e-09	0.0682051	3.98884	0.330958	0.565096	0.235287	0.0173082	0	0.585053
Bola3	0.173507	4.57053	3.3443	0.067438	0.0974071	4.57053	1.05469	0.304431	-0.0553122	0.0341792	0.0810895	0.328844
Bop1	0.30646	4.64788	9.08979	0.0025704	0.0752462	4.64788	0.548311	0.459009	-0.0993061	0.0251738	0.00395559	0.482066
Bpnt1	0.71109	8.33425	440.024	1.06987e-97	0.0271607	8.33425	0.644839	0.421964	-0.237411	0.00856485	0	0.445813
Bptf	0.121587	4.87549	0.638263	0.424341	0.225806	4.87549	2.19837	0.138156	-0.0367804	0.0746429	0.447997	0.158819
Brap	0.272521	5.26779	15.853	6.84578e-05	-0.0263952	5.26779	0.148514	0.699959	-0.0894838	-0.00631988	0.000118362	0.714121
Brd2	-0.120007	7.75372	10.3796	0.00127413	0.0147308	7.75372	0.156397	0.692495	0.0453901	0.00480351	0.00205416	0.707176
Brd4	0.101355	5.39755	2.38193	0.122746	0.115658	5.39755	3.10044	0.0782712	-0.0312487	0.0376932	0.141244	0.0939796
Brd7	-0.0621289	3.44633	0.250492	0.616729	0.148325	3.44633	1.43036	0.231705	0.0178826	0.0516789	0.63465	0.256311
Brd8	-0.0387696	5.83625	0.567238	0.451358	-0.0755567	5.83625	2.15417	0.142184	0.0179648	-0.026545	0.473712	0.163099
Brd9	0.127759	6.99372	6.68123	0.00974335	0.00618294	6.99372	0.0156533	0.900434	-0.0407727	0.00198597	0.0133673	0.906089
Bre	-0.077182	5.60385	1.66648	0.196731	0.0380745	5.60385	0.405428	0.524299	0.0306296	0.0124096	0.219138	0.545558
Brf1	0.305621	5.91391	12.6894	0.000367744	-0.0767063	5.91391	0.799753	0.371167	-0.099772	-0.0263748	0.000603265	0.395498
Bri3bp	0.177663	3.70282	2.56748	0.109081	0.0704295	3.70282	0.404647	0.524699	-0.0486698	0.0291113	0.126693	0.545875
Brox	-8.24595	3.57785	967.751	1.83684e-212	-0.290978	3.57785	1.3431	0.246489	0.998775	-0.00122549	0	0.271408
Brpf1	0.636273	3.31547	20.8484	4.9711e-06	0.0346447	3.31547	0.0592802	0.807637	-0.208225	0.00245709	1.14544e-05	0.817543
Brpf3	0.473207	5.24701	43.2783	4.74809e-11	0.101323	5.24701	1.98428	0.15894	-0.155386	0.0353912	0	0.180575
Bsdc1	-0.0928853	7.72474	7.34887	0.00671048	0.0213268	7.72474	0.387401	0.533668	0.0363113	0.00681743	0.00943079	0.554588
Btaf1	-7.8561	4.91408	1694.47	0	0.22112	4.91408	0.533154	0.465284	0.993251	0.000660834	0	0.488175
Btbd1	-8.08644	5.12474	564.86	7.369e-125	0.234497	5.12474	0.498283	0.480256	0.992252	0.00348128	0	0.5032
Btbd10	0.0521591	6.68503	0.738344	0.390192	-0.00262237	6.68503	0.0018779	0.965435	-0.0128889	-0.00166699	0.413741	0.96742
Btbd19	-0.300224	4.63065	10.1555	0.00143872	-0.0172776	4.63065	0.0338248	0.85408	0.103886	-0.0108072	0.00227561	0.86194
Btbd6	-0.237397	3.33958	3.08434	0.0790495	0.0844996	3.33958	0.388309	0.53319	0.085553	0.0238536	0.0941552	0.554149
Btbd7	7.66514	7.04557	752.312	1.26073e-165	-0.129722	7.04557	0.275133	0.599909	-0.988631	-0.000810355	0	0.618645
Btc	0.106757	6.5896	5.61965	0.0177601	-0.00584677	6.5896	0.0169308	0.896473	-0.0320727	-0.00250983	0.0235541	0.902408
Btg2	0.290995	5.02416	16.8875	3.9662e-05	0.0105974	5.02416	0.022346	0.88117	-0.0979874	-0.00301173	8.78171e-05	0.887613
Btla	0.0313935	3.88384	0.0469739	0.828415	0.200725	3.88384	1.94854	0.162745	0.000774014	0.075513	0.837164	0.184618
Btnl9	0.53901	7.91384	176.899	2.30429e-40	-0.0483004	7.91384	1.42389	0.232764	-0.181081	-0.0161028	0	0.257377
Bub1b	-0.948048	5.14429	99.1985	2.28421e-23	-0.0246577	5.14429	0.0674589	0.795073	0.328368	-0.0133623	0	0.805813
BX537302.1	-0.232957	4.6217	6.99024	0.00819556	-0.0504602	4.6217	0.328032	0.56682	0.0824516	-0.0202067	0.011378	0.586687
Bzw1	0.0600775	7.04534	2.83095	0.0924634	-0.0321547	7.04534	0.810968	0.367834	-0.0162827	-0.0114402	0.108592	0.392248
Bzw2	0.23926	7.20307	29.3907	5.91616e-08	0.00400817	7.20307	0.00823507	0.927693	-0.0788483	0.000934113	0	0.931995
C030006K11Rik	-0.0246796	5.43702	0.128351	0.720148	-0.0221323	5.43702	0.10307	0.748176	0.0126084	-0.00562048	0.733979	0.760252
C030034I22Rik	1.73857	4.64053	335.873	5.05391e-75	-0.0508043	4.64053	0.280691	0.596249	-0.532562	-0.0156024	0	0.615143
C130026I21Rik	-0.48955	5.14419	5.95239	0.0146974	0.204186	5.14419	1.04243	0.307257	0.149745	0.0607437	0.0196634	0.331769
C130050O18Rik	0.393492	4.18919	9.83938	0.00170815	-0.0384901	4.18919	0.0950815	0.757814	-0.129489	-0.016952	0.00260397	0.769518
C130074G19Rik	0.0847435	10.5276	9.14957	0.00248776	-0.0177461	10.5276	0.401268	0.526435	-0.025437	-0.00636715	0.00384868	0.547685
C1galt1	0.171761	6.16386	12.5507	0.000396053	-0.0243453	6.16386	0.252456	0.615351	-0.0571898	-0.00944456	0.000649083	0.633654
C1qbp	-0.152209	4.84783	2.57496	0.108567	0.037037	4.84783	0.152842	0.695834	0.0520416	0.0141546	0.126098	0.710352
C1qtnf5	-0.239895	4.99531	7.13336	0.00756626	0.0184496	4.99531	0.042322	0.837007	0.0857577	0.00777813	0.0105266	0.845606
C1ra	-0.0843821	8.05742	4.7729	0.0289112	0.0102317	8.05742	0.0701951	0.791053	0.0324863	0.00370716	0.0370397	0.801988
C1s	0.873782	10.0663	1271.05	2.21229e-278	-0.0011341	10.0663	0.00216234	0.962911	-0.29015	-0.000647083	0	0.964885
C2	0.0837897	8.08187	5.83473	0.0157128	0.0153233	8.08187	0.195158	0.658658	-0.0261375	0.00518262	0.0210952	0.674836
C230081A13Rik	-0.110442	3.70294	1.23378	0.266673	0.119968	3.70294	1.45507	0.227717	0.0448703	0.0449011	0.290625	0.252131
C2cd2l	0.0536429	4.40246	0.323591	0.569457	-0.00339835	4.40246	0.00128228	0.971435	-0.0169175	-0.000711003	0.589066	0.973109
C2cd5	-0.0141771	6.02935	0.0638318	0.800539	0.0665374	6.02935	1.4071	0.235538	0.00872099	0.0247035	0.810243	0.260206
C330018D20Rik	0.0156997	4.51306	0.0357347	0.850065	-0.0747326	4.51306	0.810273	0.368039	-7.31465e-05	-0.0285319	0.85792	0.392455
C3ar1	0.0312016	6.07724	0.373215	0.541257	0.0410566	6.07724	0.646716	0.421289	-0.00641065	0.0231241	0.561732	0.445137
C4a	2.39641	7.86676	818.552	4.99568e-180	-0.0905165	7.86676	1.26287	0.261109	-0.670755	-0.0219011	0	0.286009
C4b	0.271996	11.6174	135.319	2.81139e-31	-0.0367787	11.6174	2.4774	0.115493	-0.0901724	-0.0129667	0	0.134849
C530005A16Rik	0.242732	4.95463	11.2709	0.000787305	0.0481618	4.95463	0.443779	0.505304	-0.078712	0.0170028	0.00131344	0.527418
C77080	-1.06594	5.01887	91.5965	1.06283e-21	0.0380609	5.01887	0.116986	0.732327	0.347076	0.0156788	0	0.74496
C920025E04Rik	0.12472	8.59955	0.306822	0.579637	0.0733173	8.59955	0.105968	0.744782	-0.0333103	0.0211626	0.598615	0.756934
CAAA01201205.1	1.10989	3.51404	68.2124	1.468e-16	-0.101493	3.51404	0.561927	0.453485	-0.354279	-0.0235856	0	0.476671
Caap1	0.229386	3.46467	3.148	0.0760201	-0.0930215	3.46467	0.518551	0.47146	-0.0812234	-0.0346212	0.0907303	0.494307
Cab39	-0.159806	7.09172	9.52691	0.00202481	0.0548614	7.09172	1.12317	0.289237	0.0589484	0.0193719	0.00312323	0.313637
Cab39l	0.515022	7.06927	169.91	7.74307e-39	0.0352413	7.06927	0.795416	0.372468	-0.172885	0.0111741	0	0.396677
Cables1	-0.332672	5.44178	17.1538	3.44721e-05	0.0614172	5.44178	0.584018	0.444742	0.116747	0.0196148	8.01808e-05	0.467882
Cacfd1	0.231286	6.4643	21.7553	3.09739e-06	0.0136364	6.4643	0.0756822	0.783236	-0.0760856	0.00452525	1.14544e-05	0.794241
Cachd1	0.874313	6.08689	128.466	8.87651e-30	-0.0523653	6.08689	0.463611	0.495941	-0.283622	-0.0157983	0	0.518258
Cacna1a	-1.19358	5.19758	222.89	2.11886e-50	-0.0789906	5.19758	0.973358	0.323844	0.393183	-0.0256795	0	0.34818
Cacna1c	0.398527	4.89685	9.54194	0.00200829	-0.0328552	4.89685	0.0642522	0.799897	-0.135271	-0.0104509	0.0030736	0.810315
Cacna1g	-0.339975	4.48466	9.27544	0.00232247	0.201056	4.48466	3.24793	0.0715137	0.12033	0.0730177	0.00358905	0.0864197
Cacul1	4.04339	4.57639	975.39	4.01411e-214	-0.026759	4.57639	0.0315332	0.859056	-0.884859	-0.00462836	0	0.866713
Cacybp	0.0447473	4.60983	0.249256	0.617599	0.101124	4.60983	1.27221	0.259353	-0.0171215	0.0325038	0.635544	0.284363
Cadm1	-0.151245	6.0226	5.92072	0.0149638	-0.0285608	6.0226	0.210846	0.646105	0.0582279	-0.014268	0.0200223	0.662775
Cadm4	-0.201548	3.65413	2.31579	0.128066	-0.174188	3.65413	1.72563	0.18897	0.0751713	-0.0541233	0.146872	0.212456
Cage1	0.505718	3.1885	13.5512	0.000232143	-0.104602	3.1885	0.580732	0.446026	-0.166279	-0.0330316	0.000377995	0.469321
Calcrl	0.613708	4.08202	15.9321	6.56551e-05	0.0943878	4.08202	0.378186	0.538575	-0.199531	0.0305755	0.000118362	0.559315
Cald1	-0.250667	7.6007	33.7075	6.4052e-09	0.0202126	7.6007	0.219072	0.639748	0.0907867	0.00468405	0	0.656616
Calm1	0.200584	6.80368	22.5555	2.04158e-06	-0.0474068	6.80368	1.2599	0.261669	-0.0668529	-0.0167338	1.14544e-05	0.286547
Calr	0.0154501	9.62107	0.344391	0.557305	-0.0231028	9.62107	0.770057	0.380199	-0.00162946	-0.00843062	0.577302	0.40439
Camk1	0.282672	5.20562	14.2768	0.000157799	0.136988	5.20562	3.35318	0.0670754	-0.0929127	0.0459051	0.000244361	0.0812919
Camk2d	-0.102262	8.82231	8.34241	0.00387303	-0.0057527	8.82231	0.0264036	0.870919	0.0385237	-0.00226966	0.0056852	0.877923
Camk2g	-0.357821	4.84148	25.0729	5.52047e-07	-0.0412948	4.84148	0.333099	0.56384	0.130015	-0.0120992	3.81813e-06	0.583915
Camk2n1	-1.03569	3.48682	41.5953	1.12265e-10	-0.134272	3.48682	0.737573	0.39044	0.34286	-0.0498095	0	0.414359
Camkk1	-0.0494328	3.16502	0.100628	0.751077	0.317331	3.16502	4.16593	0.0412447	0.0155177	0.101519	0.763459	0.0515754
Camsap2	0.0187956	6.69241	0.0491594	0.824532	-0.0993595	6.69241	1.37242	0.241396	-0.00317456	-0.0331425	0.8334	0.266284
Camta2	-0.132378	6.86878	7.14285	0.00752635	-0.0276595	6.86878	0.3118	0.576578	0.0508926	-0.0100469	0.0104464	0.59616
Cant1	0.094829	5.45206	1.71414	0.190449	0.178575	5.45206	6.07955	0.0136755	-0.030038	0.0618825	0.212609	0.0183423
Canx	0.184769	8.59373	32.3494	1.288e-08	-0.0407797	8.59373	1.57625	0.209302	-0.0601305	-0.0140769	0	0.233311
Capn2	0.0512148	9.77645	3.28549	0.0698946	0.0334984	9.77645	1.40553	0.2358	-0.0140879	0.0110682	0.0839684	0.260454
Capn3	0.0943938	4.95462	1.08576	0.297413	0.0377509	4.95462	0.17341	0.677099	-0.028502	0.00999785	0.321586	0.692197
Capns1	-1.23433	10.2183	2675.16	0	0.00649404	10.2183	0.0754983	0.783493	0.406384	0.00167443	0	0.794558
Caprin1	-0.0123284	6.15657	0.0433735	0.835023	-0.0280514	6.15657	0.224709	0.635475	0.00607884	-0.0113264	0.843563	0.652546
Capza1	8.14327	4.44002	1483.14	0	-0.295722	4.44002	0.685116	0.407831	-0.995198	-0.00283318	0	0.431701
Car13	0.986009	6.85549	394.139	1.03945e-87	0.0155459	6.85549	0.0983926	0.753767	-0.323678	0.00465321	0	0.765635
Car2	0.326252	4.12095	8.21602	0.00415221	0.0304544	4.12095	0.0703672	0.790803	-0.111892	0.00411686	0.00604793	0.801705
Car3	0.233619	15.3525	141.891	1.02745e-32	-0.0474442	15.3525	5.85815	0.0155051	-0.0767739	-0.01665	0	0.0205377
Carf	-1.34533	3.24591	63.1843	1.88247e-15	0.150546	3.24591	0.811992	0.367532	0.424573	0.0335756	0	0.392008
Carkd	-0.407532	7.31099	84.7605	3.36785e-20	0.0310732	7.31099	0.493338	0.482442	0.143279	0.0104073	0	0.505361
Cars	-0.211937	6.6519	13.6329	0.000222262	-0.0884675	6.6519	2.37602	0.123211	0.076643	-0.0294621	0.000351268	0.143295
Cars2	0.338343	6.09526	29.9389	4.4588e-08	0.0768178	6.09526	1.54366	0.214074	-0.113152	0.0245482	0	0.238538
Casc4	0.0224086	5.50157	0.112916	0.736848	0.0298542	5.50157	0.200491	0.654325	-0.00441837	0.0125005	0.749912	0.670671
Casc5	0.0239698	4.09858	0.0358836	0.849756	-0.125849	4.09858	0.979356	0.322358	0.00371497	-0.0300787	0.85761	0.346641
Casd1	1.11748	5.51458	262.4	5.14563e-59	0.179422	5.51458	6.74739	0.00938848	-0.36398	0.0531794	0	0.0128366
Casp3	-0.0192361	3.87425	0.0231899	0.878964	-0.0708718	3.87425	0.304677	0.580965	0.027265	-0.0295719	0.885403	0.600421
Casp7	0.214846	5.59346	9.17847	0.00244878	-0.0254439	5.59346	0.128757	0.719724	-0.0730612	-0.0105596	0.00382195	0.73296
Casp8	0.138574	7.71841	9.68504	0.00185774	-0.0150867	7.71841	0.114856	0.734682	-0.044109	-0.00545338	0.00284069	0.74719
Casp8ap2	0.153658	4.74415	3.67235	0.0553221	0.0818235	4.74415	1.04203	0.30735	-0.0478239	0.0315673	0.0673404	0.331876
Casp9	-7.77919	5.13289	1332.85	8.2156e-292	0.126711	5.13289	0.153768	0.69496	0.992605	0.0009597	0	0.709505
Casq2	0.116627	3.87574	0.519395	0.4711	-0.109997	3.87574	0.465442	0.495092	-0.0238373	-0.03964	0.493089	0.517434
Cast	1.17141	7.21892	132.165	1.3772e-30	-0.0692592	7.21892	0.471323	0.492379	-0.371725	-0.0232269	0	0.514845
Casz1	-0.501401	3.38207	10.5092	0.00118781	-0.0846723	3.38207	0.302365	0.582404	0.168059	-0.0377248	0.00190525	0.601715
Cat	-0.177873	11.0095	66.5844	3.35234e-16	0.0218853	11.0095	1.00851	0.315261	0.0651709	0.00717899	0	0.339642
Catsper2	0.322669	4.07798	6.28373	0.0121851	-0.0335708	4.07798	0.0680528	0.794193	-0.104375	-0.012631	0.0165134	0.805069
Catsperg1	-0.847829	4.03712	51.9816	5.6024e-13	0.0648832	4.03712	0.298344	0.584922	0.283518	0.00698095	0	0.60409
Cav2	-0.0289208	8.86554	0.924979	0.336171	-0.0198463	8.86554	0.435598	0.509255	0.0138641	-0.0074743	0.360146	0.531194
Cbfa2t2	-4.61974	6.21643	41.0493	1.48434e-10	1.27384	6.21643	3.34256	0.0675094	0.633011	0.104489	0	0.0817577
Cbfa2t3	-0.230703	4.92654	9.10529	0.00254871	0.0813993	4.92654	1.13341	0.287049	0.0853445	0.0269524	0.00391359	0.311529
Cbl	0.163012	5.76836	5.56437	0.0183296	-0.00565954	5.76836	0.00671347	0.934698	-0.0529592	-0.00292978	0.0243368	0.938463
Cbll1	0.211887	3.87638	2.99737	0.0834	-0.168348	3.87638	1.89202	0.168975	-0.0704258	-0.0594703	0.0989928	0.191063
Cbr1	2.05947	6.11695	1116.98	6.72781e-245	0.124209	6.11695	4.00119	0.0454682	-0.609311	0.0258283	0	0.0565008
Cbwd1	0.296549	5.37211	17.3518	3.10597e-05	0.124051	5.37211	3.0373	0.081371	-0.093726	0.0425119	7.25446e-05	0.0973281
Cbx1	-0.299769	5.89391	30.6757	3.0496e-08	-0.0057228	5.89391	0.0112115	0.915674	0.107378	-0.00244236	0	0.920705
Cc2d1a	-0.061059	6.23632	1.19151	0.275026	-0.0228952	6.23632	0.167467	0.682373	0.0256326	-0.00771405	0.298899	0.697272
Ccar1	0.0326231	4.29739	0.158883	0.690187	-0.0237318	4.29739	0.0841286	0.771778	-0.00535428	-0.00786887	0.705412	0.783199
Ccdc111	0.0231491	4.93954	0.0550985	0.814418	-0.0293763	4.93954	0.0889588	0.765505	-0.00615893	-0.013197	0.823587	0.777147
Ccdc117	0.658489	5.26623	104.202	1.82717e-24	0.124867	5.26623	3.73361	0.0533279	-0.217749	0.0420726	0	0.0654008
Ccdc12	-0.818708	3.72876	40.6911	1.78299e-10	-0.0147281	3.72876	0.0132017	0.908525	0.273552	-0.00769753	0	0.913935
Ccdc126	-0.123855	4.40063	1.60596	0.20506	0.120341	4.40063	1.51705	0.218067	0.0488074	0.0447459	0.227885	0.24241
Ccdc127	-2.53191	6.8026	2819.62	0	-0.0659927	6.8026	1.81917	0.177412	0.706997	-0.0106434	0	0.200112
Ccdc130	-0.238306	3.56996	2.57346	0.10867	0.174956	3.56996	1.38532	0.239196	0.0865066	0.0549401	0.126174	0.264089
Ccdc134	0.110161	5.4926	2.48129	0.115208	-0.0212527	5.4926	0.092441	0.761097	-0.0340594	-0.00843552	0.133478	0.772836
Ccdc141	0.579082	3.63725	14.4732	0.000142165	0.128085	3.63725	0.711343	0.398998	-0.185087	0.0414939	0.000229088	0.422954
Ccdc163	-0.922215	3.4545	42.1704	8.36568e-11	0.000252885	3.4545	1.0763e-05	0.997382	0.308663	7.79287e-05	0	0.997507
Ccdc171	-1.19322	2.9296	20.4651	6.07282e-06	0.104196	2.9296	0.143722	0.704608	0.361358	0.031799	1.14544e-05	0.718405
Ccdc24	0.129065	2.98939	0.690948	0.405842	-0.100155	2.98939	0.417209	0.518333	-0.0324627	-0.0361274	0.429357	0.53993
Ccdc28a	0.675263	5.90428	98.8754	2.68902e-23	0.0683468	5.90428	1.01483	0.313749	-0.22316	0.0245335	0	0.338168
Ccdc28b	0.273018	6.14475	24.1243	9.03147e-07	0.108347	6.14475	3.79924	0.0512759	-0.0905421	0.0371137	7.63627e-06	0.062877
Ccdc3	0.726016	6.28794	108.36	2.24088e-25	0.000635475	6.28794	7.90004e-05	0.992908	-0.239662	-0.000857114	0	0.993173
Ccdc32	-0.0645643	5.36372	0.802329	0.370398	-0.0709372	5.36372	0.968171	0.325137	0.0282041	-0.0263335	0.393974	0.349607
Ccdc34	0.153063	4.95279	2.42883	0.119121	-0.0156549	4.95279	0.0255171	0.873085	-0.0487493	-0.00687154	0.137537	0.88
Ccdc41	-0.18781	6.56374	15.1849	9.7482e-05	0.0383964	6.56374	0.634545	0.425693	0.0690392	0.012827	0.00016418	0.449471
Ccdc43	-0.151762	4.29215	2.85209	0.0912552	0.0542022	4.29215	0.363727	0.546444	0.0541831	0.0162965	0.107255	0.566863
Ccdc47	-0.0406271	4.14107	0.173889	0.676679	0.0610639	4.14107	0.391713	0.5314	0.0189994	0.0175898	0.692354	0.552335
Ccdc50	-0.0448657	9.45259	3.35603	0.0669593	-0.0180271	9.45259	0.541816	0.461681	0.0193273	-0.00656709	0.080555	0.484632
Ccdc55	0.482688	5.92002	68.613	1.19814e-16	-0.0375706	5.92002	0.415565	0.519158	-0.161564	-0.0131169	0	0.540625
Ccdc58	0.279713	3.7347	3.97666	0.0461349	-0.272395	3.7347	3.76847	0.0522274	-0.0943875	-0.0920023	0.0570277	0.0640263
Ccdc80	0.0129654	8.74256	0.195712	0.658205	-0.0411232	8.74256	1.96875	0.160581	-0.000957241	-0.0149676	0.674531	0.182335
Ccdc84	0.068785	4.47243	0.400001	0.527089	-0.0377334	4.47243	0.119831	0.729217	-0.0223057	-0.0105378	0.547704	0.742119
Ccdc85c	0.182992	4.06628	2.13578	0.143897	0.0813826	4.06628	0.423492	0.5152	-0.0585638	0.0319571	0.163279	0.536929
Ccdc88a	-0.0380334	7.82064	0.998749	0.317613	0.0116968	7.82064	0.0944954	0.758538	0.017146	0.00400595	0.341502	0.770328
Ccdc88c	-0.869804	5.43767	104.312	1.72837e-24	0.0694457	5.43767	0.666556	0.414255	0.293577	0.0198552	0	0.437879
Ccdc9	-0.332575	5.53587	25.3295	4.83262e-07	0.0386646	5.53587	0.341964	0.558698	0.117637	0.0121708	3.81813e-06	0.578864
Ccdc90b	0.115671	4.55921	1.89194	0.168983	0.111615	4.55921	1.76244	0.184321	-0.0351393	0.0404856	0.190017	0.207596
Ccdc91	-0.349332	7.80459	77.5388	1.30139e-18	0.000786423	7.80459	0.000391454	0.984215	0.123805	0.00015476	0	0.984949
Ccdc93	0.190498	7.65153	31.4232	2.07486e-08	0.0138728	7.65153	0.166695	0.683066	-0.0625315	0.00486863	0	0.698008
Cchcr1	0.649354	5.64623	23.8507	1.04106e-06	-0.265389	5.64623	3.99514	0.0456317	-0.208981	-0.0869625	7.63627e-06	0.0567298
Ccl6	-0.459164	5.53699	33.9834	5.55852e-09	-0.0689884	5.53699	0.765226	0.381698	0.15474	-0.0257398	0	0.405849
Ccl9	-0.146407	8.59548	16.9134	3.9124e-05	0.0238754	8.59548	0.450243	0.50222	0.0519535	0.00915501	8.78171e-05	0.52452
Ccm2l	-0.0956004	5.13102	1.78178	0.181931	0.0369525	5.13102	0.266381	0.60577	0.0373606	0.0133256	0.203972	0.624506
Ccna2	0.12895	5.58486	3.47639	0.0622505	-0.0105439	5.58486	0.0233417	0.878572	-0.0451878	-0.00551905	0.0752974	0.885158
Ccnd1	0.368461	7.1064	54.4382	1.60418e-13	0.00439673	7.1064	0.00781295	0.929566	-0.124217	0.00219268	0	0.933683
Ccnd2	-0.101222	8.91928	13.8479	0.00019822	0.0728428	8.91928	7.17182	0.00740578	0.038653	0.0248861	0.000313087	0.0102288
Ccndbp1	0.279599	7.81824	35.4905	2.56296e-09	-0.00583586	7.81824	0.0154796	0.900985	-0.0924372	-0.00226955	0	0.90667
Ccng2	-0.0178713	5.83857	0.116234	0.733156	-0.0114852	5.83857	0.0480604	0.826473	0.00887756	-0.0051707	0.746323	0.835366
Ccnh	-0.0776257	5.0214	1.28573	0.256836	0.0509686	5.0214	0.554535	0.456471	0.0329174	0.0215363	0.280671	0.479474
Ccni	-0.69421	8.54545	519.033	6.86946e-115	-0.0194542	8.54545	0.40917	0.522391	0.238999	-0.00617132	0	0.543699
Ccnl2	-0.0176742	9.14511	0.446465	0.504019	0.00369706	9.14511	0.0195313	0.888854	0.00995774	0.000831814	0.525375	0.895116
Ccnt2	-0.00617487	6.17421	0.017189	0.895691	-0.0584725	6.17421	1.54188	0.214339	0.00626188	-0.020542	0.90132	0.238821
Ccnyl1	-2.64561	5.29187	845.58	6.64363e-186	0.0716198	5.29187	0.604595	0.43683	0.726271	0.0122062	0	0.460284
Ccr2	0.55083	9.12151	157.642	3.70624e-36	0.0253016	9.12151	0.334108	0.56325	-0.181643	0.00865861	0	0.583232
Ccr5	0.117793	7.5199	7.32591	0.00679674	-0.0433603	7.5199	0.992907	0.319033	-0.0372844	-0.01551	0.00954915	0.343411
Ccr9	-0.947403	2.88676	28.5676	9.04854e-08	-0.110968	2.88676	0.381965	0.536554	0.313223	-0.040404	3.81813e-06	0.557436
Ccrl1	-0.130212	5.86046	3.68847	0.0547898	0.0663984	5.86046	0.959031	0.327431	0.051643	0.0242012	0.066699	0.351917
Ccrn4l	-0.931121	5.23473	196.512	1.20516e-44	0.027056	5.23473	0.165619	0.684035	0.3104	0.00343601	0	0.698971
Ccser2	6.31754	4.57704	1120.57	1.11502e-245	0.309346	4.57704	1.62844	0.201919	-0.977269	0.0053823	0	0.22593
Cct2	0.140801	9.32605	25.4066	4.64328e-07	-0.0124444	9.32605	0.198517	0.655921	-0.0449716	-0.00469818	3.81813e-06	0.672217
Cct4	-0.0825147	7.1263	3.00544	0.0829853	0.0442898	7.1263	0.865886	0.352097	0.032419	0.0149297	0.0985346	0.376842
Cct5	-0.0854913	8.7507	8.61685	0.00333068	0.0153415	8.7507	0.2775	0.598344	0.0333831	0.00509996	0.00498648	0.617137
Ccz1	-0.0327021	6.25329	0.349984	0.554122	0.0235497	6.25329	0.181494	0.670093	0.0158142	0.00815432	0.574385	0.685649
Cd109	-0.389548	5.00157	14.6763	0.000127644	0.0648976	5.00157	0.409061	0.522447	0.136386	0.0267391	0.000202361	0.543729
Cd14	0.394042	4.95905	25.9731	3.46208e-07	-0.0227939	4.95905	0.0869695	0.768066	-0.130552	-0.00631157	3.81813e-06	0.779591
Cd151	0.791745	4.07002	63.5207	1.58687e-15	-0.0157918	4.07002	0.0268273	0.869896	-0.257947	-0.000465693	0	0.87698
Cd164l2	4.15728	3.6379	256.063	1.23779e-57	-0.174844	3.6379	0.460515	0.497383	-0.880306	0.000789283	0	0.519747
Cd2	-0.17691	3.64796	1.47653	0.224318	-0.0335487	3.64796	0.0536891	0.816764	0.0542538	-0.0230156	0.247621	0.826141
Cd200	0.26965	7.0286	21.8339	2.97305e-06	-0.00174717	7.0286	0.000911425	0.975916	-0.087813	-0.000364659	1.14544e-05	0.97724
Cd22	-0.801642	4.36639	14.8017	0.000119426	-0.049107	4.36639	0.0563899	0.812296	0.241476	-0.0242387	0.000198543	0.821941
Cd274	0.431229	4.46508	17.3538	3.10283e-05	-0.111342	4.46508	1.15537	0.282428	-0.143594	-0.0333524	7.25446e-05	0.306837
Cd2ap	0.0930421	8.12754	8.18719	0.00421873	-0.0320894	8.12754	0.973975	0.323691	-0.0280837	-0.011618	0.00613956	0.348019
Cd2bp2	1.1187	2.9261	54.5947	1.48138e-13	-0.025308	2.9261	0.0276072	0.868036	-0.367142	-0.00552986	0	0.875197
Cd300ld	-7.6131	3.93952	370.544	1.42468e-82	-0.485064	3.93952	0.845026	0.357963	0.992281	-0.00474243	0	0.382608
Cd300lg	-0.093796	4.19931	1.12724	0.288366	0.0762408	4.19931	0.745413	0.387932	0.028543	0.0223352	0.312335	0.411988
Cd320	0.0603264	7.0888	1.36173	0.243238	0.0559943	7.0888	1.17307	0.278771	-0.0173179	0.0185569	0.266914	0.303217
Cd33	0.288383	3.40314	6.16959	0.0129965	0.0680694	3.40314	0.344977	0.55697	-0.0974787	0.02074	0.0175023	0.577149
Cd3eap	-0.309881	3.5274	5.69276	0.0170351	-0.0144618	3.5274	0.0121264	0.912314	0.11157	-0.000246755	0.0226683	0.91757
Cd44	-0.0176136	4.82567	0.0477065	0.827103	-0.141006	4.82567	3.05638	0.0804204	0.019341	-0.056272	0.835984	0.0962361
Cd47	0.368447	7.6857	55.0996	1.14576e-13	-0.00594344	7.6857	0.0143649	0.904599	-0.123097	-0.00262374	0	0.910068
Cd48	-0.0177748	5.00433	0.0491421	0.824563	-0.0443005	5.00433	0.305074	0.580719	0.0212808	-0.00871167	0.833415	0.600142
Cd55	-0.153849	6.28931	9.32111	0.00226529	-0.0618228	6.28931	1.50516	0.21988	0.0550703	-0.0232723	0.00350505	0.24433
Cd59a	0.846203	9.54118	627.327	1.90599e-138	0.0174454	9.54118	0.269228	0.60385	-0.28139	0.00525703	0	0.622627
Cd59b	-0.103069	4.76826	0.194601	0.659115	0.123218	4.76826	0.284861	0.593533	0.0262747	0.0398988	0.675371	0.612452
Cd63	-0.0816324	8.09797	3.942	0.0470948	0.0263606	8.09797	0.411045	0.52144	0.0317159	0.00878843	0.05807	0.542782
Cd68	-0.12461	8.92262	16.0839	6.05957e-05	-0.0154997	8.92262	0.248902	0.617849	0.0432852	-0.00716598	0.000110726	0.635964
Cd72	-0.252115	6.61233	29.1346	6.75217e-08	-0.0237	6.61233	0.257457	0.611873	0.0877823	-0.00842798	0	0.630343
Cd74	-0.169086	11.1025	62.8517	2.22875e-15	0.00919261	11.1025	0.185861	0.666384	0.0624097	0.00281554	0	0.682198
Cd81	-0.165376	3.01584	1.31908	0.250757	-0.130743	3.01584	0.824915	0.363747	0.0602996	-0.045019	0.274352	0.388316
Cd82	-0.0229906	6.3116	0.122285	0.726569	0.0416457	6.3116	0.400868	0.526641	0.0130167	0.0135637	0.74005	0.54786
Cd84	-0.337823	4.91015	16.1593	5.82334e-05	0.0735333	4.91015	0.769296	0.380435	0.124563	0.0285057	0.000106908	0.404608
Cd86	-0.00424323	4.53112	0.00201444	0.964201	-0.0190861	4.53112	0.0403881	0.840724	0.0109509	0.00145702	0.966328	0.849115
Cd93	-1.21926	5.50112	417.608	8.09115e-93	-0.0164716	5.50112	0.0734819	0.786333	0.396657	-0.00870827	0	0.797257
Cd97	-0.375518	9.5292	179.556	6.05792e-41	0.00151626	9.5292	0.00293763	0.956776	0.132962	-9.60866e-05	0	0.95923
Cdadc1	-0.0833832	3.31991	0.468018	0.4939	-0.20002	3.31991	2.69451	0.100694	0.0382004	-0.0693616	0.515612	0.118584
Cdan1	-0.168249	6.60484	16.0887	6.04445e-05	0.0738501	6.60484	3.09927	0.0783276	0.0607296	0.0250597	0.000110726	0.0940368
Cdc14b	-0.0121181	3.13729	0.00466841	0.945526	0.0123653	3.13729	0.00444671	0.946834	0.0126214	2.686e-05	0.948402	0.949944
Cdc16	0.233383	7.90473	42.7385	6.25688e-11	-0.0232945	7.90473	0.425918	0.513999	-0.0769837	-0.00840608	0	0.535776
Cdc23	-0.00436674	6.34293	0.00731964	0.93182	-0.0282425	6.34293	0.306646	0.579746	0.00515132	-0.0112753	0.935558	0.599237
Cdc27	0.0765725	6.77013	3.32935	0.0680536	-0.0201359	6.77013	0.230204	0.631372	-0.0238907	-0.00744008	0.0818761	0.64869
Cdc37	-0.116886	5.91384	3.70692	0.0541874	-0.0280369	5.91384	0.213284	0.644206	0.0461297	-0.00920676	0.0660957	0.660938
Cdc42	0.0548646	10.3702	5.41866	0.0199227	-0.00121125	10.3702	0.00264272	0.959001	-0.0152339	-0.000771043	0.0263031	0.961345
Cdc42bpb	-0.0373659	7.6525	0.768181	0.38078	0.0517592	7.6525	1.47374	0.224757	0.0174197	0.0178983	0.404371	0.249149
Cdc42ep2	-0.283542	6.00012	19.4984	1.00684e-05	0.00915895	6.00012	0.0203968	0.886434	0.100292	0.00370944	1.52725e-05	0.892626
Cdc42ep5	-0.144063	5.39183	3.98889	0.0458013	-0.0370384	5.39183	0.264124	0.607301	0.0543351	-0.0170254	0.0565924	0.625945
Cdc42se2	6.05458	5.84673	540.912	1.19414e-119	-0.146857	5.84673	0.37171	0.542074	-0.964727	-0.00144714	0	0.562724
Cdc5l	-0.420489	5.69069	23.004	1.61665e-06	-0.0954639	5.69069	1.1869	0.275955	0.145478	-0.0333374	7.63627e-06	0.300304
Cdc73	-0.0233896	6.08531	0.195906	0.658046	0.0291864	6.08531	0.305141	0.580677	0.0140456	0.013593	0.674317	0.600096
Cdca4	0.18485	5.19424	6.10486	0.0134811	0.0125751	5.19424	0.0282215	0.866589	-0.0607996	0.0043058	0.018117	0.873643
Cdca7	-0.175028	3.54139	1.68861	0.193784	0.230349	3.54139	2.92531	0.0872004	0.0586728	0.078105	0.216026	0.103731
Cdca7l	-0.104553	5.15104	1.49285	0.221774	0.0425551	5.15104	0.247321	0.618968	0.0393153	0.01347	0.245193	0.637071
Cdh11	6.1761	4.40975	188.325	7.3781e-43	0.0735296	4.40975	0.0160106	0.89931	-0.955477	0.018292	0	0.905058
Cdh13	-0.623052	4.73232	31.2263	2.29639e-08	0.0266227	4.73232	0.0575745	0.810371	0.212635	0.0122104	0	0.820116
Cdh23	-0.0150555	5.24934	0.0247251	0.875054	-0.0377679	5.24934	0.15546	0.693372	0.00904572	-0.0122906	0.881794	0.708039
Cdk10	0.132412	5.26673	2.55896	0.10967	-0.132246	5.26673	2.55211	0.110147	-0.0416584	-0.0450094	0.12735	0.12895
Cdk11b	0.397683	4.65701	14.9878	0.000108209	0.209793	4.65701	4.17065	0.04113	-0.133822	0.0676172	0.000179452	0.0514532
Cdk13	-3.19277	3.03398	250.756	1.77672e-56	-0.0653839	3.03398	0.098953	0.75309	0.801955	0.000679281	0	0.764975
Cdk14	0.514329	7.72565	161.14	6.37577e-37	-0.0410145	7.72565	1.02675	0.310924	-0.17163	-0.0140984	0	0.335305
Cdk17	-0.213032	7.17889	21.7071	3.17621e-06	0.0336987	7.17889	0.543353	0.461046	0.0767797	0.0108533	1.14544e-05	0.483956
Cdk18	-0.0138133	4.11411	0.00599412	0.938288	-0.100506	4.11411	0.316183	0.573911	0.0137173	-0.0431356	0.941697	0.593548
Cdk2	-0.0256183	4.69116	0.0928072	0.760638	0.135263	4.69116	2.58757	0.107706	0.0126336	0.0471575	0.772554	0.126201
Cdk2ap1	3.67692	4.58882	549.94	1.29739e-121	-0.0150288	4.58882	0.00768676	0.930136	-0.843596	-0.00511753	0	0.934259
Cdk4	6.61927	5.78289	2690.31	0	0.257506	5.78289	2.05658	0.15155	-0.980631	0.00391265	0	0.172809
Cdk5	0.0821898	2.84524	0.255049	0.613542	0.265718	2.84524	2.72992	0.0984845	-0.024091	0.094989	0.631542	0.116224
Cdk5rap3	0.182877	7.69633	23.8422	1.04563e-06	0.0257373	7.69633	0.472342	0.491912	-0.0595528	0.0084227	7.63627e-06	0.51436
Cdk6	6.1468	4.57809	1133.96	1.37144e-248	0.0844857	4.57809	0.16298	0.686428	-0.972688	0.000154189	0	0.701353
Cdk8	-2.60871	5.51389	762.975	6.05701e-168	-0.043182	5.51389	0.210129	0.646666	0.714544	-0.0101396	0	0.663275
Cdkl2	-0.13866	5.63722	3.8898	0.0485801	-0.0214257	5.63722	0.0928722	0.760557	0.0496226	-0.00665145	0.0598722	0.772302
Cdkn1a	-0.337353	6.31973	34.9842	3.32387e-09	-0.0153413	6.31973	0.0727129	0.787427	0.122974	-0.0094121	0	0.798364
Cdkn1b	-0.0223419	7.15485	0.348802	0.554792	0.0451771	7.15485	1.42633	0.232365	0.0115843	0.0169313	0.575023	0.257022
Cdkn1c	0.09922	5.08142	0.166001	0.683691	-4.95786	5.08142	430.786	1.09609e-95	0.00405802	-0.925352	0.699181	0
Cdkn2aipnl	0.200713	5.19812	8.65245	0.00326623	0.0359938	5.19812	0.278275	0.597834	-0.0655766	0.0129584	0.00487194	0.616701
Cdkn2c	-0.135268	6.92824	10.4589	0.0012206	-0.0331677	6.92824	0.628843	0.42778	0.0506073	-0.0105294	0.00194725	0.451479
Cdon	-0.349808	7.66413	66.9796	2.74338e-16	0.0128808	7.66413	0.0908475	0.763103	0.125125	0.0038625	0	0.774707
Cdsn	0.681896	3.16273	33.0123	9.15754e-09	0.0334198	3.16273	0.0745221	0.784863	-0.225358	0.0159197	0	0.79581
Cdt1	0.0677127	4.73636	0.511428	0.474521	-0.0156527	4.73636	0.0277639	0.867665	-0.019223	-0.0145274	0.496304	0.8748
Cdv3	0.8063	7.83796	520.878	2.72574e-115	-0.0716733	7.83796	4.12766	0.0421877	-0.267924	-0.0224268	0	0.0527666
Cdyl	-0.0107631	4.27209	0.0120506	0.912587	-0.0329243	4.27209	0.112806	0.736972	0.00452028	-0.00854914	0.917127	0.749462
Cdyl2	-0.139626	4.7297	3.09478	0.0785438	-0.0193229	4.7297	0.0592749	0.807646	0.0518058	-0.00556807	0.0935367	0.817547
Ceacam1	-0.0460412	5.48956	0.275509	0.59966	-0.0207721	5.48956	0.0561007	0.812769	0.0193781	-0.00723594	0.617935	0.82243
Ceacam2	-0.357926	4.27057	9.52007	0.00203237	0.00622329	4.27057	0.00291236	0.956962	0.125489	0.00323497	0.00313087	0.959432
Cebpa	0.503465	7.16143	118.678	1.23174e-27	-0.00230529	7.16143	0.00247511	0.960321	-0.167772	-1.4834e-05	0	0.962426
Cebpg	0.249429	8.3874	57.5313	3.32649e-14	0.011954	8.3874	0.132208	0.716153	-0.0823556	0.00394318	0	0.729455
Cecr2	-0.465749	4.24381	19.5679	9.70843e-06	0.00786594	4.24381	0.00547607	0.94101	0.166331	0.00535703	1.52725e-05	0.944465
Cecr5	-0.0216157	4.98219	0.0662339	0.796901	-0.00552963	4.98219	0.00434167	0.947464	0.0094829	-0.00316934	0.806684	0.950532
Cela1	-0.194867	6.29512	11.2566	0.000793387	0.0591819	6.29512	1.03788	0.308315	0.0752369	0.0178148	0.00131344	0.3328
Celf2	0.268517	8.35558	72.7828	1.44735e-17	0.058737	8.35558	3.48463	0.0619413	-0.0887317	0.0198003	0	0.0754082
Cenpc1	-0.201261	5.53551	8.97491	0.00273713	-0.0783224	5.53551	1.35828	0.243837	0.0750615	-0.0274915	0.00415413	0.268732
Cenpe	-0.100635	3.37241	0.440094	0.507077	0.108479	3.37241	0.51019	0.475057	0.035507	0.0309933	0.528269	0.497877
Cenpo	-0.596976	5.81169	98.6572	3.00216e-23	0.0332441	5.81169	0.306142	0.580057	0.206754	0.0113709	0	0.599539
Cenpq	0.14367	4.21742	2.69865	0.100433	-0.0244913	4.21742	0.0784459	0.779415	-0.0449432	-0.0073316	0.117251	0.790671
Cep120	0.482897	3.52812	14.4327	0.000145256	0.0514561	3.52812	0.165058	0.684541	-0.154987	0.0267104	0.000232906	0.699494
Cep135	0.454484	3.61765	14.4876	0.000141086	-0.21325	3.61765	3.18995	0.0740925	-0.153815	-0.0776509	0.00022527	0.0892985
Cep164	0.192311	2.84244	1.75776	0.184904	-0.109656	2.84244	0.570904	0.4499	-0.0618389	-0.0429475	0.206977	0.473048
Cep170	-0.043314	6.99544	0.833804	0.361175	-0.0207597	6.99544	0.191491	0.661679	0.019237	-0.00699962	0.384895	0.677711
Cep170b	-0.0572848	5.42229	0.614933	0.432937	0.0712421	5.42229	0.952006	0.329209	0.0216409	0.0257509	0.456286	0.353651
Cep19	-0.599047	3.81496	26.3598	2.83373e-07	0.120504	3.81496	1.06302	0.302528	0.205141	0.0381458	3.81813e-06	0.326871
Cep192	-0.13822	7.21354	10.4137	0.00125085	0.0319613	7.21354	0.556882	0.455519	0.0511986	0.0104574	0.00198925	0.478592
Cep250	-0.00225375	7.43963	0.00284025	0.957498	0.0284949	7.43963	0.453729	0.500569	0.00497218	0.00856243	0.959715	0.522726
Cep290	0.13355	6.58344	5.05854	0.0245048	0.0106309	6.58344	0.0320486	0.857921	-0.0406041	0.00389609	0.0317058	0.865697
Cep44	-0.199642	4.55366	3.06653	0.0799199	-0.108359	4.55366	0.9063	0.341098	0.0623751	-0.045256	0.0951441	0.365254
Cep63	0.285064	5.81049	12.7041	0.000364855	-0.16312	5.81049	4.15991	0.0413916	-0.0924153	-0.0539154	0.000603265	0.0517625
Cep68	-0.0181765	6.56101	0.153658	0.695064	-0.00179654	6.56101	0.00149715	0.969135	0.0103728	-0.000172789	0.710112	0.970963
Cep70	-0.924805	5.53506	171.219	4.00767e-39	-0.142827	5.53506	4.07858	0.04343	0.310641	-0.0449974	0	0.0542137
Cep72	1.09823	3.82391	39.8061	2.80462e-10	-0.251443	3.82391	2.10396	0.146918	-0.338999	-0.0674177	0	0.168006
Cep76	0.189388	4.97351	5.58246	0.0181412	0.0154819	4.97351	0.0373152	0.846825	-0.0624402	0.00731178	0.0240886	0.855224
Cep85	0.200679	3.32641	1.52906	0.216253	-0.0458826	3.32641	0.0790389	0.778604	-0.0688484	-0.0110996	0.239519	0.789877
Cep85l	0.0947942	4.43198	1.05324	0.304762	-0.177531	4.43198	3.68871	0.054782	-0.0376542	-0.0652021	0.328806	0.0669663
Cep97	0.795297	5.44592	158.782	2.08854e-36	-0.0631568	5.44592	0.996624	0.318129	-0.264867	-0.0212332	0	0.342578
Cerk	-0.235375	7.73911	39.6083	3.10363e-10	0.0200787	7.73911	0.288442	0.591221	0.0841006	0.00456686	0	0.610172
Cers5	-0.0518911	7.73284	1.3201	0.250574	0.0298652	7.73284	0.437298	0.50843	0.0221067	0.0105791	0.274184	0.530411
Cetn3	-10.4427	6.93398	385.882	6.52325e-86	-0.203631	6.93398	0.207329	0.648869	0.998162	4.9518e-05	0	0.665379
Cfb	0.121238	10.3819	21.1346	4.28117e-06	0.00540123	10.3819	0.0419426	0.837729	-0.0379923	0.00154426	1.14544e-05	0.846244
Cfdp1	0.058828	4.19929	0.280313	0.596496	0.0452658	4.19929	0.166251	0.683465	-0.0146696	0.0182509	0.614953	0.698386
Cfh	-4.55609	6.59142	1578.82	0	-0.11378	6.59142	1.04594	0.306445	0.9166	-0.00574445	0	0.330899
Cfl2	-0.0192704	7.4995	0.152472	0.696184	-0.0833126	7.4995	2.85013	0.0913667	0.0100814	-0.0281387	0.711097	0.108431
Cflar	-2.28008	4.39442	138.787	4.90373e-32	0.112863	4.39442	0.356087	0.550687	0.633889	0.0264311	0	0.571002
Cgnl1	-0.0402345	9.44334	2.75718	0.0968187	0.0379701	9.44334	2.45557	0.117109	0.018004	0.0130557	0.113299	0.136685
Cgrrf1	0.0615833	5.16711	0.681804	0.408966	-0.0346468	5.16711	0.215924	0.642163	-0.0171098	-0.0126915	0.432408	0.65893
Chac1	-0.0765429	5.05185	0.949099	0.329949	-0.132987	5.05185	2.86653	0.0904396	0.0326029	-0.0495937	0.354006	0.107381
Chad	0.0496499	3.68968	0.0778032	0.780297	0.159135	3.68968	0.788187	0.374649	-0.0163154	0.0464448	0.791415	0.398873
Champ1	0.138378	5.92133	7.26116	0.00704618	-0.0165663	5.92133	0.104001	0.74708	-0.0433076	-0.00534103	0.00985842	0.759129
Chchd3	0.310774	5.10888	19.7156	8.98665e-06	0.0201774	5.10888	0.0834507	0.772674	-0.101607	0.00701732	1.52725e-05	0.784069
Chchd6	-0.097634	5.46656	1.19057	0.275214	-0.0137727	5.46656	0.0238181	0.877349	0.0361209	-0.00868471	0.299082	0.883971
Chd1	0.0350639	6.77866	0.516086	0.472516	-0.0127741	6.77866	0.0684917	0.793546	-0.00759914	-0.00457235	0.494468	0.804458
Chd2	-0.0270391	6.39245	0.25946	0.610491	-0.0298342	6.39245	0.315668	0.574223	0.0140417	-0.00835802	0.628664	0.593834
Chd3	-0.00945856	7.59578	0.0628029	0.80212	6.14396e-05	7.59578	2.7447e-06	0.998678	0.00779018	0.000346362	0.811819	0.998744
Chd4	-0.0112041	8.9238	0.124134	0.724593	-0.0341386	8.9238	1.1523	0.283069	0.00769657	-0.012028	0.738252	0.307455
Chd6	-0.164517	3.45119	1.30925	0.252531	0.0853352	3.45119	0.34922	0.554555	0.0616022	0.0204587	0.276246	0.574786
Chd7	-0.0248075	3.54627	0.0302856	0.861844	-0.158705	3.54627	1.26174	0.261322	0.00230717	-0.0613381	0.868901	0.286207
Chd8	0.0277612	6.43643	0.309687	0.577873	-0.116023	6.43643	5.40901	0.0200331	-0.00679119	-0.039514	0.597099	0.026326
Chi3l1	-1.13995	4.65545	142.62	7.11724e-33	0.125994	4.65545	1.76464	0.184046	0.366845	0.0447249	0	0.207371
Chic2	0.605662	4.1077	33.2374	8.15685e-09	0.039716	4.1077	0.144018	0.704319	-0.204965	0.0118524	0	0.718176
Chmp1a	-0.122355	7.49726	11.9644	0.000542275	-0.00622494	7.49726	0.030976	0.860294	0.0457876	-0.00272062	0.000912534	0.867831
Chmp2a	-0.0542657	7.36729	1.42093	0.23325	-0.0143759	7.36729	0.0997611	0.752117	0.0224022	-0.00557987	0.256663	0.76402
Chmp4b	-0.912786	7.93052	70.6271	4.31555e-17	0.136687	7.93052	1.60599	0.205056	0.298058	0.0406064	0	0.229073
Chmp5	-0.208509	6.24064	11.6679	0.000635879	0.0619783	6.24064	1.0313	0.309854	0.0725557	0.0179639	0.00105762	0.334236
Chp1	-0.145239	11.2065	55.0485	1.17591e-13	0.0133133	11.2065	0.462699	0.496365	0.0539575	0.00425966	0	0.518713
Chpf	-0.0130679	5.61533	0.0467219	0.828869	-0.0354552	5.61533	0.343681	0.557712	0.0103599	-0.0139578	0.837607	0.577951
Chpf2	0.0654613	6.09664	1.57507	0.209472	0.0378033	6.09664	0.525261	0.468606	-0.0189352	0.0111622	0.232326	0.491554
Chpt1	0.131033	11.4856	27.716	1.40494e-07	0.0410692	11.4856	2.72338	0.0988887	-0.041679	0.0138407	3.81813e-06	0.116633
Chrd	-0.287471	4.23652	8.76218	0.00307541	0.0877234	4.23652	0.815541	0.366487	0.0994041	0.0333023	0.00461612	0.390969
Chrnb1	0.134448	4.46668	1.71751	0.190014	0.0169432	4.46668	0.0275808	0.868098	-0.0354048	0.0139619	0.21217	0.875265
Chst14	0.272227	4.23343	7.66412	0.00563298	0.128072	4.23343	1.69738	0.192632	-0.0883563	0.0464117	0.0080639	0.216313
Chst2	-2.54092	5.9271	284.874	6.50859e-64	0.199729	5.9271	1.87333	0.171094	0.684933	0.0305986	0	0.19327
Chsy1	-1.95291	4.76064	432.036	5.85663e-96	0.0999169	4.76064	1.10959	0.292171	0.590642	0.0203772	0	0.316642
Chtf8	4.50246	3.52299	557.222	3.38091e-123	-0.676623	3.52299	9.63683	0.00190714	-0.909595	-0.0382529	0	0.00289033
Chtop	-0.00256948	5.78754	0.00189805	0.96525	0.0204316	5.78754	0.120309	0.7287	0.00473463	0.00808812	0.967385	0.7416
Chuk	-9.94532	5.55005	610.866	7.24983e-135	-0.725171	5.55005	3.86425	0.0493253	0.997459	-0.00254065	0	0.0608114
Cib2	-0.191449	6.22116	11.5145	0.000690559	-0.0580623	6.22116	1.0593	0.303376	0.070297	-0.0196716	0.00113017	0.327768
Cic	0.12012	3.20939	0.518337	0.471552	-0.186884	3.20939	1.25551	0.262503	-0.034458	-0.0607974	0.493505	0.287276
Cidec	0.0577743	11.9461	7.15854	0.00746079	-0.0068795	11.9461	0.101504	0.750033	-0.0162235	-0.00260592	0.0103586	0.762004
Cit	0.131414	3.37176	0.410374	0.52178	0.132586	3.37176	0.412434	0.520737	-0.0470521	0.0365155	0.542652	0.54216
Ckap2l	0.146816	4.07758	1.75096	0.185757	-0.0573236	4.07758	0.268315	0.604464	-0.0338706	-0.0241044	0.207859	0.623188
Ckap4	-0.0524955	6.12091	1.07159	0.300587	0.0555245	6.12091	1.19862	0.273598	0.0236667	0.0196153	0.324667	0.298021
Ckb	-0.0421053	6.17226	0.446235	0.504128	-0.0377833	6.17226	0.358727	0.549214	0.0183101	-0.00759744	0.525471	0.569612
Clasp1	0.491214	6.12221	90.1045	2.25908e-21	0.0320289	6.12221	0.382946	0.536031	-0.164859	0.0116282	0	0.556898
Clasrp	0.163745	3.21947	1.13018	0.287736	0.169399	3.21947	1.20711	0.271905	-0.0629121	0.056776	0.311648	0.296455
Clca1	0.164298	3.8844	1.42518	0.232552	0.0892005	3.8844	0.422198	0.515842	-0.0390046	0.0325564	0.255891	0.537563
Clcn3	-0.0126043	6.47537	0.0498147	0.823386	-0.0230698	6.47537	0.166876	0.682903	0.00783962	-0.00739476	0.832235	0.697818
Clcn4-2	0.336237	6.66426	49.0033	2.55534e-12	0.0734718	6.66426	2.34028	0.126067	-0.111177	0.0248409	0	0.146498
Clcn6	0.25341	3.59494	4.5676	0.0325822	0.0862328	3.59494	0.526259	0.468184	-0.0904234	0.0172381	0.0414688	0.491153
Clcn7	0.397834	6.97746	62.667	2.44778e-15	0.028007	6.97746	0.310935	0.577107	-0.132297	0.00974334	0	0.596698
Cldn12	0.629674	6.95438	167.23	2.97943e-38	0.0155188	6.95438	0.10192	0.749537	-0.211399	0.00410354	0	0.761584
Cldn15	0.0326791	4.41351	0.17539	0.675365	-0.0909144	4.41351	1.35691	0.244073	-0.00606324	-0.0303749	0.691056	0.268946
Cldn25	0.985937	7.04306	420.016	2.42043e-93	0.124852	7.04306	6.76763	0.0092826	-0.32356	0.0386448	0	0.0126877
Clec10a	-0.326746	8.67498	59.4142	1.27743e-14	-0.0160419	8.67498	0.143384	0.704939	0.114624	-0.00637828	0	0.718665
Clec11a	0.386255	3.57326	11.9159	0.000556554	-0.0492264	3.57326	0.192641	0.660728	-0.133165	-0.0156078	0.000943079	0.676822
Clec1a	0.0695757	5.26437	1.09432	0.295515	-0.0132018	5.26437	0.0393706	0.842716	-0.0207395	-0.00403981	0.319639	0.851047
Clec1b	1.37406	3.64707	84.9442	3.06902e-20	-0.213042	3.64707	2.0564	0.151567	-0.421707	-0.0578753	0	0.172824
Clec2d	0.687331	3.47997	30.0546	4.20048e-08	0.0239134	3.47997	0.0353573	0.850849	-0.221056	0.0144113	0	0.859065
Clec3b	0.659608	7.21654	209.212	2.04089e-47	-0.0331267	7.21654	0.528783	0.467119	-0.218997	-0.0128966	0	0.490046
Clec4a1	-0.268155	5.8291	20.4876	6.00191e-06	0.0170111	5.8291	0.0827056	0.773664	0.101585	0.00711151	1.14544e-05	0.785085
Clec4a2	0.461066	7.5186	87.6392	7.85518e-21	0.0438079	7.5186	0.791927	0.373518	-0.152722	0.017237	0	0.397701
Clec4a3	0.936599	5.51413	175.379	4.94712e-40	0.0218513	5.51413	0.0933907	0.75991	-0.300904	0.0119583	0	0.771721
Clec4b1	-0.773981	5.31946	63.7819	1.38985e-15	-0.0437567	5.31946	0.203225	0.65213	0.252433	-0.0204231	0	0.668655
Clec7a	-0.474999	7.2948	40.4607	2.00612e-10	-0.0206671	7.2948	0.0769571	0.781464	0.155502	-0.0122199	0	0.79261
Clec9a	0.811158	4.15121	45.8606	1.26977e-11	-0.0384056	4.15121	0.103812	0.747303	-0.262233	-0.00781131	0	0.759366
Clic1	0.0282443	7.78341	0.384459	0.535227	-0.00813536	7.78341	0.0319199	0.858204	-0.00478815	-0.00335607	0.555752	0.86598
Clic4	-0.262202	9.95804	67.0432	2.65627e-16	0.00580297	9.95804	0.0328705	0.85613	0.0940856	0.00156762	0	0.863929
Clic5	-0.13969	6.63919	11.3901	0.000738355	0.059897	6.63919	2.09362	0.147915	0.0535521	0.0218282	0.00122562	0.168998
Clint1	0.00348498	7.16552	0.00855417	0.92631	0.0305111	7.16552	0.65575	0.418064	0.00273513	0.00960218	0.930185	0.441804
Clip1	0.0735571	5.44003	1.21594	0.27016	-0.0355182	5.44003	0.283562	0.594376	-0.0227885	-0.0135424	0.293954	0.613254
Clip2	-0.0858072	6.53197	2.91817	0.0875872	-0.0129788	6.53197	0.0667847	0.796077	0.0338569	-0.0049833	0.103372	0.80676
Clip3	-0.235305	5.12704	2.92486	0.0872246	-0.119337	5.12704	0.75259	0.385658	0.0850251	-0.0405923	0.102998	0.409793
Clk1	-0.26503	6.57353	36.7969	1.31095e-09	-0.0311535	6.57353	0.508287	0.475881	0.093962	-0.012563	0	0.498675
Clk2	-0.0349408	5.05946	0.204076	0.651451	0.00370152	5.05946	0.0022725	0.961979	0.0162745	-0.000211233	0.66796	0.963957
Clk4	-0.181153	5.41718	6.69249	0.00968198	-0.0116786	5.41718	0.0276952	0.867827	0.0651875	-0.0028639	0.0132833	0.87499
Clmn	0.223191	6.50718	13.6738	0.000217467	0.0462358	6.50718	0.586309	0.44385	-0.080037	0.0123568	0.000343632	0.467072
Clmp	-0.263556	8.42244	86.9601	1.10731e-20	-0.0340812	8.42244	1.45456	0.227798	0.0945255	-0.0121209	0	0.252195
Cln3	-0.239557	4.94913	3.80744	0.0510255	-0.13752	4.94913	1.25444	0.262707	0.0852023	-0.0458912	0.062732	0.287479
Cln6	0.213623	3.46435	1.75917	0.184729	0.244922	3.46435	2.30986	0.128555	-0.0694949	0.0820416	0.206767	0.148911
Clock	-0.102734	6.85293	4.17157	0.0411077	0.0534052	6.85293	1.12747	0.288315	0.0402494	0.0193876	0.0511821	0.312766
Clp1	0.0629633	4.81574	0.537414	0.463506	-0.164503	4.81574	3.66671	0.0555096	-0.0195603	-0.0564484	0.485671	0.0677261
Clpb	0.00734266	3.40923	0.00385196	0.950512	0.0975843	3.40923	0.681868	0.408944	-0.00124495	0.0493856	0.953102	0.432759
Clptm1	0.0263715	6.30594	0.290385	0.589974	0.0550364	6.30594	1.26465	0.260773	-0.00558232	0.0177974	0.60858	0.2857
Clstn1	-0.104962	6.44014	3.19812	0.0737231	0.0421377	6.44014	0.515546	0.472748	0.0394574	0.0154237	0.0881951	0.495724
Clstn2	-1.54692	5.01933	194.804	2.84339e-44	0.156915	5.01933	2.02072	0.155166	0.473531	0.0324934	0	0.176551
Cluap1	-0.460239	3.94702	8.8026	0.00300802	0.13256	3.94702	0.730789	0.392627	0.160293	0.0491657	0.00448249	0.416578
Cluh	0.111451	8.72181	13.7188	0.000212324	-0.0290954	8.72181	0.935001	0.333567	-0.0355688	-0.0109373	0.000332178	0.357992
Clvs1	-0.374706	5.3155	29.2928	6.22259e-08	0.00143257	5.3155	0.000472483	0.982658	0.134208	0.00343071	0	0.983551
Cma1	-0.309399	4.79965	11.0349	0.000894119	0.074165	4.79965	0.634082	0.425862	0.111431	0.0298256	0.00145089	0.449627
Cmah	0.233047	6.33639	13.6909	0.000215494	0.000220912	6.33639	1.13229e-05	0.997315	-0.0759216	-0.000451446	0.000343632	0.997438
Cmas	0.120118	6.83014	8.63577	0.00329626	-0.00374261	6.83014	0.00837984	0.927062	-0.0376248	-0.000804759	0.00494067	0.931457
Cmbl	-0.103367	4.14229	1.18899	0.275533	0.0306266	4.14229	0.104647	0.746323	0.0408884	0.0124666	0.299414	0.758366
Cmc1	-0.0809871	4.79189	0.92034	0.337386	0.180071	4.79189	4.54907	0.0329366	0.0328001	0.0615017	0.361238	0.0418353
Cmklr1	0.0592144	6.85476	1.87444	0.170967	-0.0833732	6.85476	3.71559	0.0539066	-0.017352	-0.0286236	0.192163	0.0661339
Cmpk2	-0.375432	3.94271	8.36754	0.00381983	0.0908579	3.94271	0.489804	0.484015	0.133251	0.0322753	0.0056432	0.506911
Cmss1	-0.260646	4.46865	5.65568	0.017399	0.00539086	4.46865	0.00245954	0.960446	0.0907082	0.00363756	0.0231341	0.96254
Cmtm6	-0.175958	7.51854	29.4346	5.78356e-08	-0.0525214	7.51854	2.62239	0.105366	0.0635628	-0.0187423	0	0.12352
Cmtm7	0.235999	5.77691	18.0221	2.18354e-05	0.0558957	5.77691	1.01025	0.314844	-0.0771233	0.0206852	5.34539e-05	0.339295
Cnbd2	-0.103156	6.02642	4.03213	0.0446415	-0.0192496	6.02642	0.140366	0.707917	0.0382618	-0.00615719	0.0551835	0.721524
Cnep1r1	-0.101959	4.90369	1.74477	0.186536	-0.00745072	4.90369	0.00930752	0.923143	0.0402135	-0.00184281	0.208695	0.927749
Cnih	-8.19171	5.75376	2789.93	0	-0.0408514	5.75376	0.0128403	0.909781	0.99436	-0.000705572	0	0.915192
Cnih4	-0.0127952	5.51788	0.0406032	0.840306	0.0228055	5.51788	0.129001	0.71947	0.008571	0.00702791	0.848481	0.732704
Cnksr1	0.129289	3.93956	0.75691	0.384297	0.0476234	3.93956	0.103883	0.747219	-0.0474981	0.0269188	0.407949	0.75927
Cnot1	-0.0310928	5.39899	0.0422603	0.837124	0.0553698	5.39899	0.134527	0.713784	0.0136876	0.0189375	0.845545	0.727145
Cnot2	0.0161275	5.51627	0.0575942	0.81034	0.0441946	5.51627	0.432747	0.510644	-0.000867158	0.014827	0.819654	0.532469
Cnot4	-0.0548868	5.47968	1.00161	0.316921	0.00256336	5.47968	0.00219607	0.962623	0.0263135	0.00236734	0.340776	0.964625
Cnot6	-4.77865	4.56771	701.541	1.38217e-154	0.235297	4.56771	1.5526	0.212752	0.928125	0.0122472	0	0.237095
Cnot6l	0.263017	6.37243	23.3602	1.3433e-06	-0.0790135	6.37243	2.1088	0.146454	-0.0882395	-0.0282851	7.63627e-06	0.167463
Cnp	0.327467	4.47434	20.9779	4.64606e-06	-0.0811651	4.47434	1.28638	0.256717	-0.110217	-0.0303402	1.14544e-05	0.281645
Cnpy2	-0.0777344	7.06498	3.2013	0.0735796	0.102726	7.06498	5.59014	0.0180619	0.0313167	0.0351863	0.0880347	0.0238863
Cnpy3	-0.0648606	4.75169	0.65875	0.417002	-0.0202336	4.75169	0.0641043	0.800123	0.0275354	-0.0050959	0.440666	0.810502
Cntd1	0.174885	6.93691	22.501	2.10039e-06	0.018321	6.93691	0.246844	0.619306	-0.0563467	0.00578611	1.14544e-05	0.637407
Cntln	-0.304682	5.20896	13.9618	0.000186565	-0.0376293	5.20896	0.212406	0.644888	0.108872	-0.0129371	0.000293996	0.661625
Cntnap1	0.410454	4.17792	9.50737	0.00204648	0.00285893	4.17792	0.000469588	0.982711	-0.1524	-0.00329259	0.00314614	0.983613
Cntrob	-0.39979	4.08633	11.8608	0.000573288	0.0499633	4.08633	0.185556	0.666641	0.140096	0.0192068	0.000973624	0.682377
Cobl	0.489967	3.75281	18.2232	1.96471e-05	-0.159423	3.75281	1.92071	0.165778	-0.155697	-0.0645528	4.58176e-05	0.187619
Cog1	0.290147	3.1037	5.01435	0.0251381	0.3093	3.1037	5.69682	0.0169957	-0.0998351	0.109759	0.0325381	0.0225537
Cog2	-0.0321859	7.40611	0.538679	0.462981	-0.00804966	7.40611	0.0337126	0.854319	0.014543	-0.00377022	0.48522	0.86212
Cog6	-0.0301907	6.93952	0.409865	0.522038	0.000848328	6.93952	0.000324083	0.985637	0.0139927	0.000181086	0.542889	0.986209
Coil	-0.0080265	5.09844	0.0127925	0.909948	0.0042607	5.09844	0.00357246	0.952339	0.00505439	-0.000519448	0.914726	0.954988
Col11a2	-1.74257	5.48575	23.4578	1.27682e-06	0.534677	5.48575	2.23941	0.134533	0.422793	0.0924084	7.63627e-06	0.154932
Col12a1	0.0970863	5.06397	1.78714	0.181275	-0.063359	5.06397	0.762147	0.382657	-0.0250153	-0.0270065	0.203274	0.406784
Col14a1	0.0487102	6.15275	0.467253	0.494253	-0.0246916	6.15275	0.120171	0.728849	-0.0114935	-0.0102823	0.515918	0.741757
Col16a1	-0.245595	8.85311	36.0722	1.90142e-09	0.0721272	8.85311	3.11365	0.0776388	0.0880456	0.0240949	0	0.0932388
Col1a1	0.297233	8.14644	60.5954	7.00979e-15	0.0264371	8.14644	0.47959	0.488608	-0.100011	0.00809163	0	0.511172
Col1a2	-0.195111	10.0421	66.6435	3.25332e-16	-0.0122699	10.0421	0.263701	0.607589	0.0711764	-0.00482904	0	0.626235
Col20a1	0.708547	3.622	33.474	7.2222e-09	-0.0152431	3.622	0.0151515	0.902035	-0.22979	-0.00834188	0	0.907616
Col27a1	0.241724	4.81449	5.13784	0.0234097	0.187606	4.81449	3.09019	0.0787656	-0.0832242	0.0591931	0.0303885	0.0945141
Col28a1	2.81891	4.06626	118.153	1.60534e-27	0.13732	4.06626	0.299499	0.584197	-0.713753	0.0203597	0	0.603353
Col3a1	2.30093	4.70875	505.319	6.61721e-112	-0.165137	4.70875	2.5805	0.108188	-0.651931	-0.0313535	0	0.126705
Col4a2	-0.0154822	12.2222	0.738888	0.390017	0.00549683	12.2222	0.0931431	0.760219	0.00909075	0.00163948	0.413542	0.771981
Col4a3	0.688087	3.69831	8.90451	0.00284468	-0.157237	3.69831	0.456274	0.49937	-0.209858	-0.0554476	0.00431449	0.52155
Col4a3bp	-3.55484	3.62921	520.398	3.46741e-115	0.107572	3.62921	0.411315	0.521303	0.848066	0.0151068	0	0.542675
Col6a3	-0.317784	9.19939	129.209	6.10511e-30	-0.00724949	9.19939	0.0672895	0.795325	0.112917	-0.00254214	0	0.806077
Col8a1	-0.306665	6.79626	37.5819	8.76541e-10	-0.0578296	6.79626	1.33589	0.24776	0.112681	-0.0175545	0	0.272603
Colgalt2	-0.339685	3.32664	3.9491	0.0468965	0.03658	3.32664	0.0452295	0.831583	0.120299	0.0123765	0.0578218	0.840253
Commd1	-0.0422352	4.41494	0.160927	0.688304	-0.105405	4.41494	1.00217	0.316786	0.0176649	-0.0362531	0.703774	0.341215
Commd10	-0.276767	4.65576	6.80591	0.00908568	-0.0607291	4.65576	0.327844	0.566932	0.10025	-0.0191821	0.0125082	0.586801
Commd2	0.225545	6.79007	20.7127	5.33606e-06	0.0463928	6.79007	0.876414	0.349186	-0.0746475	0.0158659	1.14544e-05	0.373807
Commd9	0.288023	6.82385	30.7007	3.01054e-08	0.0360985	6.82385	0.482414	0.487331	-0.0959191	0.011537	0	0.510038
Comtd1	-0.320801	3.17332	8.24981	0.00407563	-0.0844176	3.17332	0.572278	0.449355	0.12099	-0.0303391	0.00592956	0.47254
Copb1	0.359559	8.20334	121.709	2.67322e-28	0.0490265	8.20334	2.26484	0.13234	-0.120153	0.016383	0	0.152676
Copb2	0.00107701	9.6078	0.00205872	0.96381	0.0134526	9.6078	0.321269	0.570846	0.00348218	0.00454119	0.965996	0.590578
Coprs	0.0245118	4.88194	0.0701452	0.791125	0.127215	4.88194	1.88832	0.169392	-0.0056298	0.0434093	0.801377	0.191487
Cops2	0.383417	4.67178	26.48	2.66279e-07	-0.192379	4.67178	6.65956	0.00986252	-0.123007	-0.0659832	3.81813e-06	0.0133864
Cops3	0.513397	6.24712	87.5601	8.17586e-21	-0.0405346	6.24712	0.5459	0.459998	-0.172212	-0.014659	0	0.483044
Cops5	4.6905	7.53241	2244.79	0	0.093487	7.53241	1.01061	0.314756	-0.92226	0.00378871	0	0.339184
Cops7a	-0.102521	6.20128	4.38719	0.03621	-0.0271805	6.20128	0.308327	0.578709	0.0392797	-0.00957741	0.0455274	0.59818
Cops7b	-0.108468	3.28245	0.538346	0.463119	-0.125449	3.28245	0.720924	0.395841	0.0407077	-0.0383028	0.485354	0.419762
Cops8	0.0272266	6.71591	0.344537	0.557222	-0.0298158	6.71591	0.413171	0.520364	-0.00574402	-0.0102872	0.577199	0.541801
Copz2	0.514472	7.59083	153.306	3.28367e-35	-0.0355318	7.59083	0.732559	0.392055	-0.171873	-0.0123161	0	0.416005
Coq10a	-0.210775	5.70336	6.11823	0.0133795	0.110484	5.70336	1.6806	0.194845	0.0765263	0.0367434	0.0179681	0.218634
Coq10b	0.210397	5.95211	12.4493	0.000418142	-0.064484	5.95211	1.16916	0.279573	-0.0704156	-0.0242046	0.00067581	0.30403
Coq2	8.46769	4.87172	1474.99	0	1.37992	4.87172	15.4417	8.50891e-05	-0.994027	0.00597296	0	0.000125998
Coq5	0.125813	6.07531	3.60656	0.0575519	0.00196762	6.07531	0.000875068	0.976401	-0.040033	0.000184153	0.0700055	0.977664
Coro1a	0.192612	5.97284	6.76004	0.00932216	-0.00966744	5.97284	0.0173463	0.895217	-0.0643572	-0.0139204	0.0128442	0.901206
Coro1c	2.8471	6.2382	1626.67	0	-0.0361137	6.2382	0.25848	0.611166	-0.753446	-0.0064894	0	0.62966
Coro2a	-0.0815115	5.42195	0.888044	0.346008	0.0253223	5.42195	0.0854015	0.770107	0.0300275	0.00313634	0.369679	0.781545
Coro2b	0.0754375	4.96891	0.840339	0.3593	0.103024	4.96891	1.56746	0.210576	-0.0203302	0.0343499	0.383104	0.234655
Coro7	0.0584098	3.3378	0.253647	0.614518	0.00588913	3.3378	0.00261995	0.959178	-0.0112804	-0.000977835	0.632501	0.961452
Cox14	-0.0424489	6.91189	0.800113	0.37106	-0.0810895	6.91189	2.91933	0.0875241	0.0190825	-0.028117	0.394558	0.104151
Cox17	0.240101	4.2151	6.3286	0.0118806	0.073689	4.2151	0.595315	0.440371	-0.0767832	0.0236073	0.0161163	0.463628
Cox18	-0.800866	4.47249	49.1615	2.35738e-12	0.00827156	4.47249	0.00518227	0.942611	0.268255	0.00148442	0	0.945954
Cox19	-0.116178	8.0893	5.10239	0.0238929	-0.0743305	8.0893	2.08918	0.148346	0.043227	-0.0264781	0.0310376	0.169487
Cox7a2	-7.10587	4.517	1081.3	3.82308e-237	-0.353076	4.517	1.3964	0.237327	0.986914	-0.0034498	0	0.262027
Cox7a2l	9.28651	6.67104	240.782	2.65525e-54	0.320194	6.67104	0.431102	0.511449	-0.992321	0.00344743	0	0.533283
Cox8a	8.80573	10.9588	2840.36	0	0.192005	10.9588	2.17336	0.140419	-0.995189	0.000514766	0	0.161217
Cpd	0.160174	7.91737	21.7897	3.04235e-06	0.0241877	7.91737	0.496919	0.480857	-0.0515439	0.0080504	1.14544e-05	0.50386
Cpe	-0.433121	5.92111	41.0092	1.51512e-10	0.0610839	5.92111	0.814318	0.366847	0.155313	0.0187171	0	0.391347
Cpeb1	-1.0242	3.86016	89.739	2.71739e-21	0.0234207	3.86016	0.0474998	0.827472	0.350567	0.00641256	0	0.836362
Cpeb3	2.87358	5.22483	602.622	4.50374e-133	-0.161487	5.22483	1.93296	0.164435	-0.749027	-0.0204237	0	0.186336
Cpeb4	0.0745485	5.98728	1.54161	0.214378	-0.0146277	5.98728	0.0593878	0.807466	-0.0201948	-0.00446212	0.237679	0.817375
Cped1	-0.352648	8.59684	134.569	4.10223e-31	0.0122927	8.59684	0.163648	0.68582	0.125881	0.00311025	0	0.70075
Cpm	-1.55275	3.65033	39.0518	4.12706e-10	0.0330248	3.65033	0.0315607	0.858995	0.470986	-0.00124491	0	0.866659
Cpne1	-0.0339667	8.88057	1.50881	0.219321	0.00449087	8.88057	0.0263749	0.870988	0.015438	0.00133094	0.242707	0.878003
Cpne8	0.349324	6.33713	32.1283	1.44323e-08	0.0413991	6.33713	0.451771	0.501495	-0.115541	0.0158454	0	0.523734
Cpox	0.188717	6.04151	7.25063	0.0070876	0.113546	6.04151	2.62525	0.105176	-0.0610357	0.0385046	0.00992715	0.123341
Cpsf1	-0.125857	3.26358	0.756388	0.384461	0.245918	3.26358	2.88104	0.089628	0.0572837	0.0821858	0.408136	0.106503
Cpsf3	0.0815442	5.67872	1.41531	0.234178	-0.0252187	5.67872	0.135323	0.712976	-0.0234755	-0.00793675	0.25761	0.726427
Cpsf3l	0.117173	7.36792	8.66523	0.0032434	0.0488419	7.36792	1.50574	0.21979	-0.0364971	0.0170619	0.00486812	0.244208
Cpsf4	0.252967	4.78647	10.0956	0.00148621	-0.0793591	4.78647	0.992664	0.319092	-0.0837896	-0.0273502	0.00235579	0.343472
Cpsf6	-0.0341104	8.17296	0.983359	0.321371	-0.000589734	8.17296	0.000294014	0.986319	0.015413	-0.000498501	0.345194	0.986992
Cpsf7	-1.82906	3.38779	110.256	8.61083e-26	-0.15771	3.38779	0.845605	0.357799	0.537735	-0.0370395	0	0.382455
Cpt1c	-0.387199	3.69501	5.48991	0.0191265	-0.0987627	3.69501	0.359687	0.54868	0.135879	-0.0370947	0.0253524	0.569146
Cpxm1	-0.190902	5.60247	7.1663	0.00742859	0.0176602	5.60247	0.0614535	0.804213	0.0735469	0.00709959	0.0102975	0.81437
Cradd	0.4028	3.46083	9.36063	0.00221696	-0.0317319	3.46083	0.0575043	0.810485	-0.135004	-0.00093699	0.00342105	0.820223
Cramp1l	-0.0728486	6.11943	1.53771	0.21496	0.0194641	6.11943	0.109625	0.740572	0.0293616	0.00499443	0.238213	0.752963
Crbn	0.0711479	4.869	0.730979	0.392566	-0.140547	4.869	2.85247	0.0912337	-0.0228009	-0.0490693	0.416146	0.108275
Creb3	0.266539	7.43825	46.7635	8.00906e-12	-0.047546	7.43825	1.48847	0.222455	-0.0879765	-0.016302	0	0.246995
Creb3l1	-0.236826	2.85245	1.90905	0.167069	-0.329669	2.85245	3.69568	0.0545536	0.0729591	-0.10637	0.187978	0.0667219
Creb3l2	-0.360703	5.73837	14.7046	0.000125736	-0.103158	5.73837	1.20593	0.27214	0.123144	-0.0389482	0.000202361	0.296684
Crebbp	-0.0167949	5.64861	0.0538666	0.816467	0.0102211	5.64861	0.0198951	0.88783	0.0107339	0.00358949	0.825668	0.894096
Crebl2	-0.132765	7.74638	15.0337	0.000105609	-0.030047	7.74638	0.770009	0.380214	0.0494242	-0.0098682	0.000179452	0.404405
Crebrf	-0.0744085	7.79685	3.86599	0.049274	0.00783936	7.79685	0.0428938	0.835925	0.0297871	0.00119067	0.0606549	0.844545
Crebzf	0.0567764	5.68994	0.872001	0.350402	0.0284092	5.68994	0.218395	0.640266	-0.0129143	0.00966681	0.374196	0.657051
Creg1	0.681293	8.46928	283.036	1.63719e-63	0.0276349	8.46928	0.467769	0.494015	-0.228277	0.00870772	0	0.516372
Crim1	0.197306	9.02577	64.9624	7.63402e-16	-0.00474795	9.02577	0.037639	0.84617	-0.0642934	-0.00221104	0	0.854544
Crip1	-0.0766327	4.30442	0.769307	0.380432	-0.0315277	4.30442	0.129798	0.718642	0.0301282	-0.0101943	0.404008	0.731837
Crk	-0.429168	7.07298	124.108	7.97856e-29	-0.0379858	7.07298	0.97159	0.324284	0.150365	-0.0128243	0	0.348672
Crlf3	-0.0390172	5.84843	0.453953	0.500464	-0.0357792	5.84843	0.38203	0.536519	0.0169183	-0.0141797	0.52187	0.557379
Crnkl1	-0.179934	7.00807	17.868	2.36766e-05	0.0498858	7.00807	1.37356	0.241202	0.0662288	0.0175094	6.10902e-05	0.26609
Crot	-0.274587	7.24403	28.2443	1.06929e-07	-0.000728429	7.24403	0.000201709	0.988668	0.0986326	-0.00221579	3.81813e-06	0.989271
Crtc3	-0.0456924	5.75641	0.369757	0.543137	0.0686504	5.75641	0.835438	0.360705	0.0164288	0.0230545	0.563675	0.385349
Crybg3	-0.112055	7.78121	8.11641	0.00438664	-0.0619796	7.78121	2.48297	0.115085	0.043019	-0.0215246	0.00634574	0.134437
Cs	0.0315756	9.51126	1.42316	0.232884	-0.0299739	9.51126	1.28248	0.257439	-0.00702413	-0.0108209	0.256281	0.282408
Csde1	-0.017694	7.13369	0.238228	0.625489	-0.0191066	7.13369	0.277819	0.598134	0.00982776	-0.00719541	0.643218	0.616961
Csf1	0.11566	3.9155	1.10752	0.292621	0.139794	3.9155	1.61933	0.203185	-0.0273472	0.0496603	0.316726	0.227271
Csf1r	-0.0116981	8.24705	0.104789	0.746156	-0.0234678	8.24705	0.421607	0.516136	0.00802214	-0.00802497	0.758839	0.537834
Csgalnact1	0.0298457	5.42366	0.197447	0.656789	0.00742348	5.42366	0.0122121	0.912006	-0.00701121	0.002129	0.673107	0.917288
Csgalnact2	0.0265964	5.96446	0.289453	0.590571	-0.00347681	5.96446	0.00495298	0.943893	-0.00474417	-0.00133859	0.609218	0.94705
Csnk1a1	0.328909	10.384	188.892	5.54802e-43	-0.0332323	10.384	1.93143	0.164602	-0.109629	-0.0115768	0	0.186466
Csnk1d	-0.0986204	6.69359	6.48719	0.0108655	-0.0316993	6.69359	0.670169	0.412993	0.0380102	-0.0118722	0.0147953	0.436619
Csnk1g1	1.10125	4.73427	142.143	9.04879e-33	0.00389273	4.73427	0.00184285	0.965759	-0.359714	0.0036279	0	0.967802
Csnk1g3	7.48838	5.33034	2229.74	0	-0.62598	5.33034	5.97031	0.0145487	-0.990601	-0.00433413	0	0.0194038
Csnk2a1	-2.35853	4.58818	406.075	2.62094e-90	0.0504485	4.58818	0.183615	0.668285	0.666538	0.0110186	0	0.683912
Csnk2b	0.0732583	8.61065	2.61958	0.105552	0.0120474	8.61065	0.0708348	0.790125	-0.0214455	0.00368913	0.122879	0.800991
Cspg4	-0.336906	3.19441	4.89098	0.0269974	0.0964626	3.19441	0.395674	0.529332	0.118494	0.0335999	0.0348099	0.550396
Cspp1	-0.419963	5.69885	48.5407	3.23511e-12	0.0694324	5.69885	1.32594	0.249529	0.147988	0.0232294	0	0.274329
Csrnp1	-0.247337	5.10313	10.4162	0.00124916	0.0804711	5.10313	1.10168	0.293897	0.0887418	0.029112	0.00198925	0.318406
Csrnp2	-0.179357	4.31392	3.44777	0.063337	0.192547	4.31392	3.97534	0.046171	0.0668391	0.0749327	0.0764772	0.0573789
Csrp1	-0.817854	10.3647	264.583	1.72039e-59	-0.0176322	10.3647	0.124455	0.724252	0.278028	-0.0057237	0	0.737339
Csrp2	-0.024935	7.37731	0.120999	0.727953	-0.00305175	7.37731	0.00181125	0.966053	0.00805924	-0.000723453	0.741287	0.968046
Csrp2bp	-0.0360008	5.91752	0.33282	0.564003	0.00184941	5.91752	0.000876132	0.976386	0.0174803	0.000798699	0.583831	0.977656
Cst3	0.171146	11.2157	62.1524	3.17879e-15	-0.00109394	11.2157	0.00254076	0.959799	-0.0553039	-0.000552251	0	0.961945
Cstf3	0.00798749	4.82977	0.0110005	0.916469	0.149765	4.82977	3.86675	0.0492519	-0.00143682	0.0486773	0.920778	0.0607542
CT030159.1	0.436634	3.59567	9.7441	0.00179899	-0.241551	3.59567	2.97391	0.0846173	-0.147859	-0.0768934	0.00274524	0.101058
CT030259.1	0.885712	4.12063	46.2262	1.05361e-11	0.00769808	4.12063	0.00304637	0.955984	-0.291333	0.000920069	0	0.958573
CT030702.1	0.220775	4.09409	5.09628	0.0239772	-0.0437584	4.09409	0.200122	0.654622	-0.0760096	-0.0189856	0.0311483	0.670926
CT033755.1	-0.152385	4.41975	2.91381	0.0878242	0.0276404	4.41975	0.0957068	0.757044	0.0566057	0.0116254	0.103632	0.768755
Ctage5	-0.246544	7.10625	23.9672	9.7991e-07	-0.037934	7.10625	0.56759	0.451218	0.0886234	-0.0131345	7.63627e-06	0.474376
Ctc1	0.294636	6.41667	20.1313	7.23048e-06	-0.0341971	6.41667	0.271227	0.60251	-0.0969271	-0.0110464	1.14544e-05	0.621253
Ctdnep1	-0.0392099	6.25858	0.417266	0.518304	-0.0729736	6.25858	1.44476	0.229371	0.0174738	-0.0254239	0.53938	0.253879
Ctdp1	-0.0949779	6.07458	2.39232	0.121932	-0.0737309	6.07458	1.44185	0.22984	0.0375421	-0.0269727	0.14037	0.25436
Ctdsp1	0.100308	7.26571	4.92222	0.0265135	0.0165655	7.26571	0.134243	0.714073	-0.0303136	0.00544695	0.034241	0.727431
Ctdsp2	0.285094	8.43478	65.2032	6.75582e-16	-0.0029544	8.43478	0.00700183	0.933313	-0.0944773	-0.00149159	0	0.937184
Ctdspl2	0.0269071	6.1417	0.255536	0.613203	0.00993349	6.1417	0.0348506	0.851909	-0.00387921	0.0054025	0.631218	0.860039
Ctgf	0.189764	6.65918	12.3654	0.000437362	0.034128	6.65918	0.400479	0.526842	-0.0643869	0.013065	0.000713991	0.548017
Ctif	-0.0283651	6.3042	0.247938	0.618531	-0.026298	6.3042	0.213239	0.64424	0.0150826	-0.0111667	0.636521	0.660961
Ctla2a	-0.55941	7.49655	43.6976	3.83239e-11	-0.013409	7.49655	0.0251557	0.87398	0.193057	-0.00471076	0	0.880832
Ctla2b	1.25535	4.79074	109.573	1.2152e-25	0.142352	4.79074	1.41538	0.234165	-0.397091	0.0443133	0	0.258831
Ctnna1	0.0559252	7.60569	1.9545	0.162102	0.0117495	7.60569	0.0862712	0.768972	-0.0153249	0.00404226	0.182721	0.780484
Ctnnbip1	0.133209	6.0892	4.52218	0.0334582	-0.00569457	6.0892	0.00825979	0.927585	-0.0419135	-0.00243237	0.0424806	0.931892
Ctnnd1	0.0457771	6.39158	0.760274	0.383243	-0.0896687	6.39158	2.91697	0.0876524	-0.0121056	-0.0311126	0.406906	0.104296
Ctps	-0.218419	3.62797	3.99229	0.0457088	0.0445346	3.62797	0.166462	0.683275	0.0763872	0.00889228	0.0564931	0.698211
Ctr9	0.0532706	6.71027	1.02729	0.310797	-0.0275433	6.71027	0.274642	0.600235	-0.0151353	-0.0105321	0.334591	0.618965
Ctsc	1.23454	6.02527	369.251	2.72493e-82	-0.0286781	6.02527	0.200601	0.654236	-0.395202	-0.00656664	0	0.670575
Ctsd	-0.0316191	11.9959	3.61139	0.0573853	0.00927446	11.9959	0.310716	0.577241	0.0146675	0.00292464	0.0697879	0.596813
Ctsf	-0.692877	8.41679	398.7	1.05663e-88	0.00961148	8.41679	0.0771236	0.781234	0.238456	0.00264408	0	0.792427
Ctsh	0.297482	8.3834	54.3518	1.67626e-13	0.358667	8.3834	78.9787	6.27824e-19	-0.0963946	0.121674	0	0
Ctso	0.0501218	5.39929	0.591365	0.441892	0.0590357	5.39929	0.821104	0.364857	-0.0117667	0.0244069	0.46482	0.389438
Cttn	-0.0911009	8.76631	8.57193	0.00341385	0.0451049	8.76631	2.10134	0.14717	0.0352711	0.0149776	0.00510866	0.16828
Ctu1	-0.248607	3.89322	4.35789	0.0368379	0.0202592	3.89322	0.0291949	0.86433	0.0924891	0.0095125	0.0462032	0.871508
Ctu2	-0.102002	7.20112	6.85341	0.0088472	0.0537081	7.20112	1.89999	0.16808	0.0400033	0.018992	0.0121913	0.190044
Cuedc1	0.436183	6.41986	63.7039	1.44597e-15	0.0753121	6.41986	1.90085	0.167983	-0.146128	0.0258662	0	0.189945
Cul4a	-0.26592	8.78526	87.4498	8.64462e-21	-0.0190988	8.78526	0.451402	0.50167	0.0956184	-0.00698536	0	0.523905
Cul7	0.0096844	3.65234	0.0028073	0.957745	-0.0873648	3.65234	0.218218	0.640401	-0.0070696	-0.0245835	0.959971	0.657177
Cul9	-0.244472	4.85914	6.93874	0.00843484	-0.191984	4.85914	4.27964	0.0385715	0.0898286	-0.0675639	0.0117217	0.0484139
Cuta	0.0148447	6.54951	0.0736667	0.786071	-0.000831932	6.54951	0.000233604	0.987806	-0.000791762	-0.00169019	0.7967	0.988439
Cux1	-0.566416	6.20507	91.8365	9.41421e-22	-0.00438248	6.20507	0.00561815	0.940251	0.197029	-0.00291191	0	0.94374
Cwc27	0.226204	3.97384	2.18362	0.139486	0.114542	3.97384	0.56014	0.454204	-0.0756854	0.0384684	0.158666	0.477336
Cx3cr1	-0.0720361	4.58382	0.466564	0.494572	0.0435355	4.58382	0.171646	0.678653	0.0178206	0.0226746	0.516254	0.693648
Cxcl10	2.30615	5.34897	180.992	2.94343e-41	0.234215	5.34897	1.96809	0.160651	-0.621485	0.0431105	0	0.182427
Cxcl11	2.30951	4.74232	330.315	8.20859e-74	0.116054	4.74232	0.838538	0.359815	-0.661311	0.0236165	0	0.384513
Cxcl14	-0.680333	4.77408	26.2025	3.07417e-07	0.00728552	4.77408	0.00341454	0.953403	0.238338	-0.00465527	3.81813e-06	0.956011
Cxcl16	0.471721	7.3309	96.033	1.12982e-22	0.023887	7.3309	0.246378	0.619637	-0.157284	0.00803282	0	0.637709
Cxcl9	0.664736	6.22787	89.4782	3.10035e-21	-0.0583342	6.22787	0.69269	0.405251	-0.218628	-0.0196139	0	0.429189
Cxcr4	0.444311	4.78696	32.1887	1.399e-08	0.0737312	4.78696	0.884919	0.346858	-0.138169	0.0208333	0	0.371195
Cxcr6	0.220637	4.70181	6.22895	0.0125679	0.0408585	4.70181	0.21378	0.643821	-0.075011	0.0156333	0.0170594	0.660476
Cxcr7	0.317774	5.71464	27.7991	1.34589e-07	0.0936757	5.71464	2.41562	0.12013	-0.10626	0.031774	3.81813e-06	0.139912
Cxxc1	0.12049	4.76425	1.82333	0.176917	0.00992845	4.76425	0.0123926	0.911361	-0.0392747	0.00271187	0.198688	0.916684
Cxxc5	0.1071	3.98077	1.119	0.290134	-0.0657207	3.98077	0.421744	0.516068	-0.0396872	-0.0282723	0.314202	0.537773
Cyb5b	-0.0241241	8.03454	0.436896	0.508624	-0.0584608	8.03454	2.56529	0.109233	0.0126156	-0.0211552	0.529709	0.127877
Cyb5d1	0.351133	5.3742	38.7933	4.71132e-10	0.0355865	5.3742	0.39783	0.528212	-0.120308	0.0111668	0	0.549346
Cyb5r3	1.55852	6.53976	1049.82	2.65767e-230	0.0592044	6.53976	1.49856	0.220893	-0.488897	0.0148932	0	0.245338
Cyb5r4	-0.144471	8.26887	10.8428	0.000991825	-0.0290001	8.26887	0.436928	0.508609	0.0540333	-0.0103082	0.00157689	0.530579
Cyb5rl	-0.522338	3.26964	10.6062	0.00112707	0.209723	3.26964	1.70817	0.191223	0.172565	0.0650368	0.00177925	0.214843
Cyba	0.127376	8.9083	14.2925	0.00015649	-0.0364706	8.9083	1.17233	0.278924	-0.0418223	-0.0158697	0.000240542	0.303343
Cyfip1	-0.0392838	8.96046	1.90298	0.167745	-0.0299237	8.96046	1.10408	0.293373	0.0176073	-0.0106291	0.188746	0.317875
Cyfip2	-0.0189165	3.57955	0.0191933	0.889814	0.209729	3.57955	2.34343	0.125812	0.0111514	0.0773035	0.896044	0.146223
Cygb	-0.150639	6.69524	11.5834	0.000665436	0.016617	6.69524	0.14091	0.707378	0.056843	0.00350166	0.00109962	0.720971
Cyhr1	0.127226	5.9638	6.29832	0.0120853	0.00433426	5.9638	0.00730614	0.931883	-0.0416986	0.000180603	0.0163722	0.935733
Cyp20a1	0.164814	5.73615	7.4394	0.00638112	0.00636715	5.73615	0.0111311	0.915976	-0.056476	0.00269722	0.00904898	0.920976
Cyp21a1	0.267145	3.66208	1.25484	0.26263	-0.100049	3.66208	0.180166	0.67123	-0.0849377	-0.0361481	0.286467	0.686734
Cyp21a2-ps	-0.0832544	3.53414	0.136699	0.711585	-0.325261	3.53414	2.11907	0.145475	0.0384229	-0.10271	0.725678	0.166597
Cyp27a1	0.343624	6.87605	57.921	2.72854e-14	-0.0974997	6.87605	4.66375	0.0308058	-0.114719	-0.0329291	0	0.0394681
Cyp2d22	-0.542605	5.21096	12.3019	0.000452494	-0.0377241	5.21096	0.0598147	0.806789	0.17604	-0.0113519	0.000740718	0.816794
Cyp2j6	0.406198	5.08446	18.7494	1.49071e-05	0.0364187	5.08446	0.150742	0.697828	-0.136136	0.0107407	3.43632e-05	0.712143
Cyp2j9	0.22007	5.24566	6.08122	0.0136627	-0.0187496	5.24566	0.0441285	0.833615	-0.0738984	-0.0077957	0.0183576	0.842258
Cyp39a1	0.743328	3.69244	17.2542	3.26966e-05	-0.0155932	3.69244	0.00683965	0.934088	-0.230261	0.00275655	8.01808e-05	0.937974
Cyp4b1	-0.242556	7.04181	25.0679	5.53479e-07	0.0364596	7.04181	0.566722	0.451564	0.0860467	0.0109679	3.81813e-06	0.474754
Cyp4f16	0.109778	5.83447	2.42421	0.119473	-0.059852	5.83447	0.720919	0.395843	-0.0319108	-0.0206916	0.137846	0.419766
Cyp4f17	-0.828812	5.86059	102.11	5.25348e-24	0.0920398	5.86059	1.26432	0.260834	0.278596	0.0292767	0	0.285757
Cyp51	-0.202837	7.60503	18.3838	1.80584e-05	0.0305263	7.60503	0.416796	0.51854	0.071894	0.0127005	4.58176e-05	0.540083
Cyp7b1	0.49583	3.37261	8.17098	0.00425658	0.200096	3.37261	1.32655	0.24942	-0.15944	0.064107	0.00618538	0.274218
Cys1	0.156	3.16487	1.20195	0.272932	-0.0457868	3.16487	0.103739	0.747388	-0.0560392	-0.020101	0.296707	0.759427
Cyyr1	0.381857	4.71778	21.5659	3.41879e-06	0.0576867	4.71778	0.489231	0.48427	-0.136988	0.0147313	1.14544e-05	0.507159
D030028A08Rik	0.536468	5.02196	52.9909	3.35092e-13	0.0328298	5.02196	0.197953	0.656378	-0.179067	0.0068601	0	0.672679
D030056L22Rik	-0.0710111	3.63726	0.344919	0.557004	0.0611098	3.63726	0.256166	0.612767	0.0259052	0.023597	0.577039	0.631195
D10Wsu102e	0.203427	4.07994	3.77435	0.0520441	-0.012758	4.07994	0.0148122	0.903132	-0.0667616	-0.000389756	0.0638888	0.908609
D11Wsu47e	0.00145629	4.61155	0.000165374	0.98974	-0.0761171	4.61155	0.486495	0.485495	0.00529536	-0.0276254	0.990649	0.5084
D130040H23Rik	-0.0121233	3.0235	0.00811536	0.928219	-0.233482	3.0235	3.07311	0.0795971	0.0207201	-0.0867244	0.931961	0.0954419
D15Ertd621e	-0.0555649	4.15116	0.359731	0.548656	0.0243422	4.15116	0.0692656	0.792409	0.0243137	0.0130103	0.569032	0.803355
D17H6S53E	0.10134	6.73408	3.87767	0.0489324	0.0268339	6.73408	0.271812	0.602119	-0.0313983	0.0085951	0.0602578	0.620859
D17H6S56E-5	-2.27619	5.1235	216.242	5.97363e-49	0.0524017	5.1235	0.124279	0.724439	0.64301	0.0130833	0	0.737515
D17Wsu92e	-0.0380511	9.54286	2.34011	0.126081	0.0071993	9.54286	0.0837681	0.772254	0.016931	0.0022273	0.144875	0.783672
D1Ertd622e	0.193764	5.61815	8.04056	0.00457414	-0.0803614	5.61815	1.38317	0.239562	-0.0637477	-0.02908	0.00657101	0.264421
D2hgdh	3.4218	3.7721	457.503	1.6803e-101	0.0048364	3.7721	0.000702855	0.978849	-0.830917	0.00448632	0	0.979905
D330041H03Rik	-2.30232	4.96615	477.942	5.99261e-106	-0.183649	4.96615	3.03906	0.0812829	0.657396	-0.033188	0	0.0972479
D430042O09Rik	-1.23328	2.9861	65.0394	7.34143e-16	0.0169222	2.9861	0.0101768	0.919646	0.412176	0.00651086	0	0.92447
D4Wsu53e	-0.231163	6.35703	21.0872	4.38857e-06	-0.0422214	6.35703	0.703338	0.401664	0.0823754	-0.0166067	1.14544e-05	0.425607
D5Ertd579e	-8.94471	5.03165	499.569	1.17942e-110	-0.154517	5.03165	0.113275	0.736446	0.995365	-0.00157027	0	0.748904
D630037F22Rik	0.240889	6.54737	24.4605	7.585e-07	-0.0139423	6.54737	0.0820302	0.774565	-0.080856	-0.00725532	7.63627e-06	0.785959
D630045J12Rik	-0.378949	3.64647	8.00234	0.00467169	0.0804113	3.64647	0.35933	0.548879	0.12873	0.0353621	0.00671228	0.569314
D6Wsu163e	-0.323302	3.9757	6.26917	0.0122857	-0.154491	3.9757	1.43128	0.231555	0.108074	-0.0529291	0.0166662	0.256136
D8Ertd738e	0.479773	8.25874	149.852	1.8677e-34	0.0138123	8.25874	0.124527	0.724175	-0.160848	0.00453805	0	0.737278
D930015E06Rik	0.549027	5.19342	45.9415	1.21836e-11	0.0954846	5.19342	1.38991	0.238421	-0.182796	0.0303157	0	0.263272
Daam1	0.0258844	6.36879	0.252721	0.615166	0.0569375	6.36879	1.22347	0.268681	-0.00352911	0.0202439	0.633089	0.29342
Dact1	-0.0832743	4.7661	1.12239	0.289405	-0.0623309	4.7661	0.628342	0.427964	0.0431968	-0.0255934	0.313438	0.451659
Daf2	3.64511	4.52641	19.5747	9.67434e-06	0.582603	4.52641	0.467573	0.494106	-0.504653	0.043499	1.52725e-05	0.516441
Dak	0.0173626	3.06644	0.0131632	0.908658	0.0319558	3.06644	0.0442985	0.833299	-0.0117435	0.0198415	0.913557	0.841933
Dap	1.10792	7.30616	673.95	1.38238e-148	0.0442696	7.30616	1.08082	0.298515	-0.361417	0.0130735	0	0.322816
Dapk1	0.248509	8.69513	40.9382	1.57117e-10	0.0637066	8.69513	2.69231	0.100834	-0.0822652	0.0217455	0	0.118717
Dapp1	0.119331	4.23973	1.28082	0.257747	-0.0560515	4.23973	0.282312	0.59519	-0.0397074	-0.0190281	0.281591	0.614059
Darc	-0.255676	4.03519	8.16453	0.00427176	0.00955064	4.03519	0.0112666	0.915468	0.0977865	0.004496	0.00620829	0.920461
Dars	-0.0529082	6.55454	0.836415	0.360424	-0.0425897	6.55454	0.54235	0.46146	0.0207186	-0.016165	0.384211	0.484319
Dars2	0.051413	5.58348	0.534735	0.464623	-0.0595486	5.58348	0.717321	0.397024	-0.0151445	-0.0223631	0.486877	0.420949
Daxx	-0.716978	6.9767	115.168	7.23181e-27	-0.0177474	6.9767	0.0708596	0.790089	0.244761	-0.00790437	0	0.800945
Dazap2	0.005373	6.64833	0.0145671	0.903933	0.0171516	6.64833	0.148617	0.69986	0.00312634	0.00510774	0.909243	0.714045
Dbf4	-0.371578	4.80529	13.8701	0.000195892	0.12887	4.80529	1.66997	0.196262	0.132899	0.0435805	0.000305451	0.220043
Dbi	-0.590848	2.87682	12.3616	0.000438263	0.0706179	2.87682	0.171741	0.678569	0.197371	0.023827	0.000717809	0.693549
Dbndd2	-0.267424	2.72667	2.19593	0.138376	0.0893037	2.72667	0.246005	0.619902	0.0981672	0.0306432	0.157479	0.637915
Dbnl	-0.160649	5.64053	8.12512	0.0043656	0.0626072	5.64053	1.23381	0.266668	0.0598573	0.0211092	0.00631901	0.29135
Dbt	0.512414	6.2314	81.0132	2.24214e-19	0.0306624	6.2314	0.290188	0.5901	-0.169066	0.0136251	0	0.609115
Dcaf11	0.0750142	7.49896	4.41436	0.0356376	-0.00808371	7.49896	0.0512506	0.820901	-0.0219899	-0.0030308	0.0448478	0.830181
Dcaf12	0.121808	4.60486	1.19875	0.273571	-0.0950305	4.60486	0.730723	0.392649	-0.035993	-0.0346881	0.297349	0.416608
Dcaf13	0.102055	3.58977	0.525789	0.468383	-0.118891	3.58977	0.713697	0.398219	-0.0332361	-0.042108	0.490455	0.422083
Dcaf15	0.0220745	5.24289	0.0624227	0.802707	-0.00242816	5.24289	0.000789733	0.977581	-0.00574938	-0.00485351	0.81243	0.97879
Dcaf4	0.168019	5.68288	9.13357	0.00250961	-0.0512592	5.68288	0.849326	0.356743	-0.058567	-0.0167901	0.00387159	0.381374
Dcaf5	0.136561	5.80687	6.09377	0.0135659	-0.0149974	5.80687	0.0735153	0.786286	-0.043957	-0.00556861	0.018243	0.797196
Dcaf7	0.137842	4.18329	2.01146	0.156115	-0.144971	4.18329	2.22605	0.1357	-0.0454503	-0.0541661	0.176272	0.156101
Dcbld1	-0.599633	4.08193	32.0156	1.5294e-08	0.0888604	4.08193	0.702054	0.402094	0.210828	0.0276078	0	0.426081
Dcbld2	-0.232171	9.75597	58.7516	1.78887e-14	0.0083749	9.75597	0.0764989	0.782099	0.0831264	0.00211113	0	0.793172
Dcdc2b	-0.119794	4.50264	1.52249	0.217244	0.087353	4.50264	0.810463	0.367983	0.0396562	0.0303332	0.240558	0.392386
Dchs1	0.146845	5.56797	5.11223	0.0237578	0.0632054	5.56797	0.947213	0.33043	-0.0441642	0.0201485	0.0308582	0.354888
Dck	0.000664549	4.8715	7.14092e-05	0.993258	-0.154858	4.8715	3.83241	0.0502705	0.00283849	-0.0535005	0.993853	0.0617431
Dclk1	0.104995	5.4887	1.47817	0.224061	0.0732557	5.4887	0.719299	0.396374	-0.0287926	0.020848	0.247392	0.420281
Dclre1a	0.598564	5.19706	72.481	1.6865e-17	-0.0623684	5.19706	0.784831	0.375668	-0.202203	-0.0228708	0	0.399904
Dclre1b	-0.114076	4.79225	2.08344	0.148904	-0.0640926	4.79225	0.657707	0.417371	0.0424076	-0.0209143	0.168605	0.441155
Dclre1c	-0.458346	6.36947	89.9489	2.44397e-21	-0.0174759	6.36947	0.130619	0.717791	0.160822	-0.00709514	0	0.731032
Dcp2	0.0427503	7.88052	1.65778	0.197903	-0.0424872	7.88052	1.63751	0.200668	-0.0111454	-0.0153608	0.220322	0.224628
Dcps	0.0320545	5.45687	0.1473	0.701129	-0.081418	5.45687	0.951709	0.329285	-0.00588887	-0.028213	0.715763	0.353731
Dctn1	0.199138	7.34757	21.6894	3.20555e-06	-0.0327301	7.34757	0.585986	0.443976	-0.0646106	-0.0119745	1.14544e-05	0.467164
Dctn3	-0.159723	7.17724	9.09442	0.00256391	-0.0904282	7.17724	2.91657	0.0876738	0.0569094	-0.0340314	0.00394031	0.104311
Dctn4	-0.0546533	6.5689	1.47199	0.225031	0.0732848	6.5689	2.64644	0.103782	0.0241104	0.026089	0.248301	0.121932
Dcun1d2	-0.0288752	6.86337	0.349146	0.554597	0.0193491	6.86337	0.156798	0.692121	0.0138916	0.00628706	0.574797	0.706763
Dcun1d4	0.16691	3.25833	1.23612	0.26622	-0.13855	3.25833	0.853171	0.355657	-0.0468054	-0.0432685	0.290209	0.380355
Ddah1	1.58455	6.46998	388.437	1.8118e-86	-0.0202405	6.46998	0.0642328	0.799927	-0.493825	-0.00625657	0	0.81033
Ddah2	-0.102977	4.60222	0.78949	0.374254	-0.0918129	4.60222	0.627605	0.428235	0.0394567	-0.0320881	0.397705	0.451937
Ddhd1	0.504186	4.24882	34.7064	3.83363e-09	-0.100049	4.24882	1.36258	0.243092	-0.16479	-0.0390267	0	0.267991
Ddit4	0.108093	4.71395	1.7254	0.188999	0.0918424	4.71395	1.24515	0.26448	-0.0387916	0.0302502	0.211063	0.289174
Ddr1	0.537903	7.56677	109	1.62314e-25	-0.104758	7.56677	4.14584	0.0417368	-0.179764	-0.0346323	0	0.0522397
Ddr2	-9.07331	5.22691	2530.5	0	0.180997	5.22691	0.237117	0.626296	0.997753	0.000408329	0	0.64397
Ddx11	0.0281623	3.38504	0.0345029	0.852641	-0.0965449	3.38504	0.404395	0.524828	-0.00638584	-0.0312878	0.860443	0.546016
Ddx17	7.32059	4.41854	1349.72	1.77284e-295	-0.102762	4.41854	0.104662	0.746305	-0.989314	-0.000371836	0	0.758354
Ddx18	0.0603272	6.00965	0.92473	0.336236	-0.0999305	6.00965	2.53655	0.111237	-0.0180995	-0.0340404	0.360203	0.130107
Ddx21	0.591574	5.0894	61.6853	4.02969e-15	0.131114	5.0894	3.02571	0.0819544	-0.197457	0.042616	0	0.097981
Ddx24	0.0730037	5.66258	1.41197	0.23473	0.0918261	5.66258	2.23407	0.134998	-0.0207557	0.0340593	0.258117	0.155383
Ddx39	-0.332532	7.24706	63.6243	1.50559e-15	-0.00494889	7.24706	0.014055	0.905629	0.118044	-0.00303621	0	0.911007
Ddx39b	1.05053	9.06514	608.314	2.60328e-134	-0.0147883	9.06514	0.122523	0.726314	-0.344216	-0.00443956	0	0.739294
Ddx42	-0.384427	5.00668	17.1228	3.50399e-05	-0.104207	5.00668	1.26009	0.261633	0.133519	-0.0352635	8.3999e-05	0.286505
Ddx47	0.224618	6.49907	18.5343	1.66876e-05	0.0195479	6.49907	0.140322	0.707961	-0.0743368	0.00637723	4.19995e-05	0.721563
Ddx5	-0.173298	7.09549	23.854	1.03926e-06	0.0158896	7.09549	0.200501	0.654317	0.0625654	0.00480703	7.63627e-06	0.670659
Ddx55	-0.0442811	4.9179	0.296834	0.585874	0.0233605	4.9179	0.0825428	0.773881	0.0190031	0.0083448	0.604689	0.785283
Ddx59	-0.549856	4.18361	29.1106	6.83633e-08	-0.00621914	4.18361	0.00381414	0.950755	0.192842	-0.00221371	0	0.953533
Ddx6	-4.7313	3.48836	377.913	3.54296e-84	-0.233116	3.48836	0.83734	0.360159	0.926722	-0.0138832	0	0.384803
Ddx60	-0.992113	3.92113	85.7722	2.01908e-20	-0.0244672	3.92113	0.0492809	0.824319	0.33363	-0.013223	0	0.833331
Decr1	-0.249128	9.69352	101.051	8.96367e-24	0.0145096	9.69352	0.343037	0.558081	0.0900599	0.00480013	0	0.578348
Decr2	-1.10458	7.33956	515	5.18159e-114	-0.0144572	7.33956	0.0890244	0.765421	0.366907	-0.00585783	0	0.777044
Dedd	0.0402328	5.8156	0.395428	0.52946	-0.0603159	5.8156	0.889059	0.345732	-0.00959145	-0.0209215	0.549983	0.370099
Dedd2	-0.0234731	5.04232	0.0834111	0.772727	-0.0759679	5.04232	0.873669	0.349942	0.0112874	-0.0252861	0.78381	0.374612
Def6	0.135288	3.6279	0.506481	0.476666	-0.215375	3.6279	1.29128	0.255813	-0.0367692	-0.0745763	0.498331	0.280671
Def8	-0.142322	6.76351	8.24104	0.00409537	0.00366634	6.76351	0.0054669	0.941059	0.0529516	0.00123995	0.00596774	0.944507
Degs1	-0.313696	9.20927	70.625	4.32017e-17	-0.0433905	9.20927	1.35328	0.244706	0.110806	-0.0147869	0	0.269625
Degs2	0.416753	4.15524	18.3266	1.86094e-05	0.00729712	4.15524	0.0052916	0.94201	-0.156771	0.00583186	4.58176e-05	0.945412
Dek	0.0724376	6.85371	2.34263	0.125877	-0.0288826	6.85371	0.372534	0.541626	-0.0206247	-0.01101	0.144631	0.562262
Dennd1b	0.329001	3.40641	6.59958	0.0102003	-0.0451587	3.40641	0.124161	0.724565	-0.115077	-0.0192925	0.0139324	0.737652
Dennd4a	0.181147	5.16498	4.20575	0.0402873	0.00130949	5.16498	0.00023343	0.98781	-0.0575152	0.00270812	0.0502161	0.98845
Dennd4c	-0.11171	6.69353	5.41243	0.0199938	-0.0873065	6.69353	3.30613	0.0690221	0.0417403	-0.031074	0.0263795	0.083453
Dennd5a	0.00731958	7.21968	0.0268869	0.869753	0.0781139	7.21968	3.06436	0.0800265	0.000657613	0.0269987	0.876835	0.095839
Depdc5	0.0326849	4.4499	0.0911942	0.762664	0.181074	4.4499	2.80333	0.0940686	-0.00702195	0.0641854	0.774581	0.111199
Deptor	-0.755488	6.55238	218.398	2.02259e-49	-0.0324933	6.55238	0.404126	0.524966	0.258189	-0.0104647	0	0.546161
Dera	-0.270988	6.29463	17.2619	3.25645e-05	0.0212323	6.29463	0.105811	0.744965	0.0979741	0.00503122	8.01808e-05	0.757098
Derl1	-0.177389	5.99261	9.61927	0.00192546	4.65344e-05	5.99261	5.14825e-07	0.999428	0.0657045	-0.000843286	0.00292087	0.999431
Derl2	0.122818	6.53826	10.1077	0.00147653	0.0485891	6.53826	1.58168	0.208519	-0.0393239	0.0167122	0.0023367	0.23254
Des	0.0234169	6.98866	0.169885	0.680214	-0.0076046	6.98866	0.0179638	0.89338	-0.00246121	-0.0039003	0.695756	0.899407
Desi1	-0.0977533	3.75663	0.78778	0.374772	-0.0728752	3.75663	0.437742	0.508215	0.0304313	-0.0240637	0.398216	0.530236
Dffa	-0.221519	5.21812	7.63477	0.00572537	-0.00672346	5.21812	0.00699311	0.933355	0.0812589	-0.00120638	0.00819372	0.93723
Dgat1	-0.0295438	4.2392	0.024308	0.876104	0.119189	4.2392	0.392899	0.53078	0.0144695	0.0390792	0.882737	0.551747
Dgka	-0.0327029	5.85951	0.21877	0.639979	0.00647297	5.85951	0.0085632	0.926271	0.0170114	0.00240981	0.656918	0.930628
Dgkd	-0.145168	6.85327	8.90311	0.00284686	0.00308175	6.85327	0.0040116	0.949498	0.0539296	0.000704069	0.00431449	0.952308
Dgke	-0.297751	6.38112	37.6287	8.55747e-10	0.0248608	6.38112	0.262306	0.60854	0.10459	0.00784311	0	0.627155
Dgkh	0.197795	3.08749	1.4503	0.228481	-0.0622905	3.08749	0.144945	0.703414	-0.0556738	-0.0197709	0.251814	0.717298
Dgkq	0.098441	5.6957	2.47013	0.116028	0.0857775	5.6957	1.87555	0.170841	-0.0297226	0.0281549	0.134333	0.193041
Dgkz	0.10826	5.81519	2.41738	0.119995	0.0239986	5.81519	0.118755	0.730389	-0.0355141	0.00742742	0.138358	0.743166
Dhcr24	-0.437553	6.52859	52.6679	3.94988e-13	-0.0690246	6.52859	1.31352	0.251758	0.150157	-0.0224098	0	0.276509
Dhcr7	-0.0775958	5.60247	0.961171	0.326892	-0.0631357	5.60247	0.636768	0.424883	0.0351994	-0.0264485	0.350711	0.448772
Dhdds	0.0511383	3.6551	0.207315	0.64888	-0.0375439	3.6551	0.111205	0.738776	-0.0185177	-0.0139506	0.665554	0.751203
Dhfr	0.297398	3.25333	2.80149	0.0941765	-0.130531	3.25333	0.53854	0.463038	-0.0974414	-0.0419848	0.110508	0.485949
Dhps	0.0873442	4.36687	0.460042	0.497604	-0.233874	4.36687	3.29049	0.0696822	-0.0241476	-0.0783159	0.519236	0.0842128
Dhrs1	-0.0753262	4.90422	0.672975	0.412016	0.057015	4.90422	0.38609	0.534362	0.0250801	0.0174249	0.435619	0.555222
Dhrs11	0.0884695	3.34105	0.317345	0.573207	0.0507689	3.34105	0.105751	0.745034	-0.0197403	0.0211906	0.592765	0.757136
Dhrs3	0.0270037	9.5757	1.09695	0.294937	-0.00776783	9.5757	0.0907743	0.763195	-0.00577749	-0.00305611	0.319009	0.774761
Dhrs7	0.241587	6.95366	12.4116	0.000426668	0.0806044	6.95366	1.38209	0.239746	-0.080093	0.0265563	0.000698719	0.26457
Dhrs9	-0.156694	5.88686	2.01857	0.155385	0.157658	5.88686	2.0416	0.153049	0.059622	0.0544908	0.175508	0.174359
Dhtkd1	-0.913895	4.45978	64.3771	1.02747e-15	0.0826362	4.45978	0.520523	0.470619	0.31081	0.0210247	0	0.493421
Dhx33	0.0181937	6.68489	0.135173	0.713128	-0.0112656	6.68489	0.0517832	0.819989	-0.00177066	-0.00290885	0.727099	0.829364
Dhx34	0.073731	3.52247	0.346212	0.556266	0.00146592	3.52247	0.000128547	0.990954	-0.0200727	-0.00151503	0.576409	0.991333
Dhx35	-0.156563	4.12521	1.47429	0.224671	0.123897	4.12521	0.919293	0.337661	0.0609787	0.03695	0.247938	0.361959
Dhx37	0.359928	3.65297	8.426	0.00369893	0.0149755	3.65297	0.0146326	0.903718	-0.11746	-0.00206992	0.00548666	0.90917
Dhx58	0.334703	4.95013	21.9813	2.75326e-06	0.00643059	4.95013	0.00806253	0.928453	-0.113796	0.00264823	1.14544e-05	0.932675
Dhx8	0.346322	5.32694	20.652	5.508e-06	0.0945875	5.32694	1.54035	0.214566	-0.116097	0.02983	1.14544e-05	0.239046
Diablo	-0.0512331	5.10126	0.493566	0.482341	0.0114662	5.10126	0.0247784	0.874921	0.0239606	0.00676799	0.504104	0.881722
Diap1	0.1611	6.55503	10.048	0.00152515	-0.049536	6.55503	0.950208	0.329666	-0.0520867	-0.0184538	0.00239015	0.354159
Diap3	0.175933	3.97249	2.234	0.135004	0.0618975	3.97249	0.276362	0.599096	-0.0631319	0.0165382	0.1541	0.617877
Dicer1	0.00626713	5.19651	0.00479004	0.944822	0.0458371	5.19651	0.254279	0.614078	0.00133488	0.0140078	0.947768	0.632417
Diexf	0.128071	4.45699	2.50515	0.113475	0.156495	4.45699	3.74078	0.0530996	-0.0417632	0.0514269	0.131523	0.0651183
Dip2b	-0.250532	6.93298	18.2728	1.9142e-05	0.0101649	6.93298	0.0301276	0.862201	0.0895159	0.0040081	4.58176e-05	0.869546
Dip2c	0.0497659	7.13861	1.22573	0.268239	0.0581184	7.13861	1.67154	0.196052	-0.0133404	0.0203043	0.292041	0.21981
Dirc2	-0.10955	6.82202	5.86254	0.0154665	0.00248934	6.82202	0.00302483	0.95614	0.042148	0.00140579	0.0207707	0.958676
Dis3l	-0.22805	6.24342	17.153	3.44861e-05	0.0111663	6.24342	0.0410534	0.839435	0.081939	0.00417065	8.01808e-05	0.847817
Dis3l2	0.0212557	4.44804	0.0316808	0.85873	0.218822	4.44804	3.41035	0.0647888	0.00296047	0.0754022	0.866216	0.0786612
Disc1	-0.0336243	3.53904	0.0710611	0.789798	-0.270868	3.53904	4.60742	0.0318339	0.0258398	-0.0895581	0.800159	0.0406135
Disp1	-0.203547	4.75185	4.40131	0.0359114	-0.0218526	4.75185	0.0506843	0.821877	0.0720287	-0.0106398	0.0451838	0.83104
Disp2	0.74817	5.767	77.5191	1.31442e-18	-0.0765039	5.767	0.804488	0.369755	-0.234128	6.64657e-05	0	0.394146
Dixdc1	0.430376	4.84143	15.0245	0.000106124	0.0205142	4.84143	0.034657	0.852316	-0.140718	0.0119371	0.000179452	0.86042
Dkk3	0.370063	5.71332	12.6578	0.000373998	0.179977	5.71332	2.99749	0.0833936	-0.127201	0.0644095	0.000610902	0.0996304
Dlat	0.240346	7.91341	30.474	3.38373e-08	-0.0195314	7.91341	0.201399	0.653594	-0.0811678	-0.00859239	0	0.670006
Dlc1	-3.71447	6.39865	2275.49	0	-0.0916989	6.39865	1.31537	0.251424	0.857182	-0.00870749	0	0.276211
Dld	0.353885	6.65076	46.7642	8.00637e-12	-0.0416935	6.65076	0.649275	0.420372	-0.120515	-0.0155671	0	0.444194
Dlec1	0.842712	5.43987	100.692	1.07479e-23	0.0937521	5.43987	1.24934	0.263679	-0.280244	0.0297031	0	0.28838
Dlg1	0.16965	5.69183	8.83135	0.00296099	0.0131393	5.69183	0.052934	0.818034	-0.0549706	0.00372489	0.00444813	0.827432
Dlg4	-0.253634	4.78544	7.48664	0.00621584	0.0179016	4.78544	0.0371716	0.847116	0.0931192	0.0043826	0.00887334	0.855507
Dlgap4	0.105534	5.95082	3.15929	0.0754961	0.0217914	5.95082	0.134816	0.71349	-0.0301642	0.00794106	0.0901576	0.726931
Dlgap5	-0.221893	3.88565	2.24875	0.133722	-0.0304351	3.88565	0.0423738	0.836909	0.0721369	-0.01157	0.152817	0.845469
Dll4	0.123005	5.543	3.63714	0.0565039	0.0137709	5.543	0.0457709	0.830593	-0.0387046	0.00596974	0.0687722	0.839287
Dmkn	0.155891	3.93502	0.68997	0.406175	-0.113725	3.93502	0.367421	0.544413	-0.0476399	-0.0371533	0.429708	0.56503
Dmrt2	0.0299477	8.1782	0.544723	0.460482	-0.0372732	8.1782	0.843568	0.358378	-0.00636321	-0.0111167	0.482696	0.382963
Dmtf1	-0.081035	7.07724	2.77576	0.0957013	0.0412851	7.07724	0.720587	0.395951	0.0314103	0.014275	0.112108	0.419896
Dmxl1	0.0653547	6.01515	1.58567	0.207946	0.00134295	6.01515	0.000669381	0.979359	-0.0178377	0.00135793	0.23081	0.980333
Dmxl2	0.0329086	7.12237	0.622501	0.430119	-0.0224137	7.12237	0.288783	0.591001	-0.00729631	-0.00825979	0.453423	0.609955
Dna2	-0.0417407	5.39056	0.371173	0.542365	-0.0775545	5.39056	1.282	0.257528	0.0151843	-0.0278146	0.562869	0.282508
Dnaaf2	-0.557694	4.61181	3.35671	0.0669316	0.364279	4.61181	1.44253	0.22973	0.153076	0.100336	0.0805168	0.25425
Dnaja1	9.14428	4.8345	293.484	8.65992e-66	-0.64742	4.8345	3.46892	0.0625321	-0.992724	-0.00727564	0	0.076084
Dnaja2	0.0572894	6.50347	1.05481	0.304401	-0.136962	6.50347	6.02971	0.0140671	-0.0159336	-0.0494263	0.328424	0.0188043
Dnaja3	0.159395	5.50264	6.69236	0.00968267	-0.0592518	5.50264	0.924703	0.336243	-0.0524441	-0.0227806	0.0132833	0.360604
Dnaja4	-0.0441026	5.30931	0.232644	0.629571	-0.0769209	5.30931	0.707118	0.400402	0.0189115	-0.0266567	0.646823	0.424443
Dnajb1	0.0542838	5.10432	0.574497	0.448477	-0.0855603	5.10432	1.42681	0.232286	-0.0179942	-0.0297175	0.471005	0.256934
Dnajb11	-0.152128	7.88314	17.9731	2.2405e-05	-0.0274499	7.88314	0.585227	0.444271	0.0561838	-0.00915698	5.7272e-05	0.467427
Dnajb12	0.0719987	5.05449	0.62497	0.429206	0.137356	5.05449	2.27376	0.13158	-0.0210462	0.0483833	0.45259	0.151954
Dnajb14	-0.0322894	7.21092	0.648204	0.420756	0.0435349	7.21092	1.17842	0.277678	0.0148592	0.0157109	0.444503	0.302034
Dnajb2	0.00798326	5.92828	0.00977685	0.921235	0.0264587	5.92828	0.10791	0.742536	0.00193929	0.00831794	0.925233	0.754776
Dnajb3	-0.591849	3.33406	26.5364	2.58625e-07	-0.125253	3.33406	1.18323	0.276699	0.21394	-0.0530014	3.81813e-06	0.30109
Dnajb4	0.680449	6.7776	155.679	9.95057e-36	0.0401654	6.7776	0.543017	0.461185	-0.22567	0.0119931	0	0.484075
Dnajb5	0.215945	4.84502	6.34129	0.0117959	0.0597359	4.84502	0.485782	0.485815	-0.0722401	0.0220105	0.0160591	0.508721
Dnajc10	0.612189	7.11086	177.036	2.15131e-40	-0.0519739	7.11086	1.27862	0.258156	-0.204856	-0.0178514	0	0.283206
Dnajc12	-0.182887	3.99361	3.15246	0.0758126	0.177837	3.99361	2.98007	0.0842954	0.0706823	0.0636886	0.0905242	0.100726
Dnajc13	-0.0154302	7.06828	0.193848	0.659733	0.0369132	7.06828	1.10932	0.29223	0.00865805	0.012701	0.67602	0.31668
Dnajc14	-0.0149677	7.9416	0.183015	0.668795	0.0130531	7.9416	0.139175	0.709103	0.00916584	0.00439469	0.684844	0.722754
Dnajc17	0.162873	5.5086	4.48954	0.0341028	0.0528591	5.5086	0.472688	0.491753	-0.0521588	0.0168969	0.0431755	0.514223
Dnajc19	-3.78534	5.01964	815.433	2.38095e-179	0.146105	5.01964	1.18482	0.276378	0.861978	0.0123781	0	0.300693
Dnajc2	-0.0152028	4.87828	0.0267213	0.870151	-0.097441	4.87828	1.09122	0.2962	0.0126492	-0.0314465	0.87719	0.32049
Dnajc24	0.159835	3.66654	1.32122	0.250374	-0.0986973	3.66654	0.505793	0.476966	-0.0504168	-0.0380026	0.273997	0.499763
Dnajc25	-0.134152	5.31866	3.39927	0.0652251	0.111223	5.31866	2.33668	0.126359	0.0493247	0.0378252	0.0786268	0.146746
Dnajc27	0.131635	4.43021	2.03063	0.154157	-0.108071	4.43021	1.36953	0.241893	-0.0421276	-0.0411754	0.174153	0.266758
Dnajc7	-0.0640058	6.33525	1.37854	0.24035	-0.1058	6.33525	3.76585	0.0523092	0.0259636	-0.0362564	0.263913	0.0641141
Dnajc8	0.155135	7.75944	13.1698	0.000284495	-0.00321317	7.75944	0.00565619	0.94005	-0.0500038	-0.00160909	0.000477267	0.943618
Dnhd1	-0.452506	5.86405	48.7512	2.90575e-12	0.0204862	5.86405	0.0999343	0.751908	0.160458	0.00707919	0	0.76378
Dnm3os	-0.0912124	3.68547	0.590213	0.442337	-0.172915	3.68547	2.11928	0.145455	0.0408396	-0.0502244	0.465236	0.166578
Dnmt3a	-0.0222603	4.90155	0.0961233	0.756532	0.0360917	4.90155	0.252615	0.61524	0.0135778	0.0143688	0.768678	0.633555
Dnpep	0.0260544	5.76039	0.0948881	0.758053	-0.0238335	5.76039	0.0791098	0.778507	-0.00607658	-0.00707321	0.770164	0.789793
Dnttip2	-0.0906594	5.58988	1.78152	0.181962	0.00319972	5.58988	0.00222328	0.962392	0.0348899	0.000245113	0.203999	0.964419
Dock1	0.174499	8.17431	20.8867	4.87267e-06	-0.0338638	8.17431	0.786794	0.375071	-0.0563346	-0.0117478	1.14544e-05	0.399255
Dock10	0.261766	7.92466	56.2219	6.47381e-14	0.0336914	7.92466	0.93175	0.334409	-0.086185	0.0111515	0	0.35887
Dock2	0.350897	4.3125	8.33016	0.00389922	-0.142729	4.3125	1.38067	0.239988	-0.111491	-0.0522034	0.00573102	0.264826
Dock4	0.0557922	5.19188	0.358992	0.549066	-0.132786	5.19188	2.03094	0.154125	-0.0168306	-0.0438016	0.569452	0.175478
Dock5	9.14541	4.13896	1279.04	4.0572e-280	0.0251345	4.13896	1.39377e-10	0.999991	-1	0	0	0.999775
Dock7	-0.0445502	5.72853	0.380531	0.537319	-0.0292982	5.72853	0.164633	0.684926	0.0185237	-0.0107341	0.557791	0.699887
Dock8	0.140479	8.35683	16.8368	4.07347e-05	0.0482927	8.35683	1.9903	0.158309	-0.042945	0.0173372	8.78171e-05	0.179888
Dock9	0.256203	8.33913	39.034	4.16483e-10	0.00795615	8.33913	0.0376376	0.846173	-0.0850123	0.00188619	0	0.854548
Dok1	-0.0190784	5.48511	0.102333	0.749048	-0.0608644	5.48511	1.04332	0.307052	0.00546789	-0.0201019	0.761481	0.33159
Dom3z	-0.0918509	3.91551	0.605443	0.436509	-0.227328	3.91551	3.70706	0.0541826	0.0411826	-0.0768941	0.459539	0.066405
Dopey1	0.479847	6.29298	72.7307	1.48604e-17	0.0204745	6.29298	0.132485	0.715869	-0.159787	0.0079391	0	0.729176
Dpagt1	-0.014365	5.86309	0.0584731	0.808926	0.0860516	5.86309	2.09734	0.147555	0.0103897	0.028676	0.818375	0.168643
Dpep1	0.0385029	8.28586	1.14507	0.284583	0.0790454	8.28586	4.82578	0.0280371	-0.00952904	0.0271637	0.30849	0.0361463
Dpf2	-0.426975	5.75031	19.9267	8.04687e-06	-0.0561806	5.75031	0.344914	0.557006	0.149467	-0.01911	1.14544e-05	0.57718
Dph1	0.239726	3.08568	2.7369	0.0980548	0.109719	3.08568	0.574349	0.448536	-0.0758665	0.0351024	0.11472	0.471723
Dpy19l1	-0.0369194	7.20635	0.621677	0.430425	0.0254724	7.20635	0.295912	0.586457	0.0164432	0.00803602	0.453717	0.605655
Dpysl3	0.344652	6.66644	52.1671	5.09722e-13	-0.0424365	6.66644	0.790887	0.373832	-0.115653	-0.0128718	0	0.398021
Dram1	0.093917	10.005	8.85286	0.0029263	-0.0245309	10.005	0.604103	0.437017	-0.0282969	-0.00869815	0.00440613	0.460471
Draxin	-2.33887	3.74643	224.793	8.14667e-51	0.197415	3.74643	1.58904	0.207464	0.664676	0.0323114	0	0.23144
Dscr3	-0.0625628	5.70241	1.48475	0.223033	0.029446	5.70241	0.328866	0.566328	0.027133	0.00996602	0.246388	0.586198
Dsel	-0.709875	7.11103	241.412	1.93549e-54	-0.00942854	7.11103	0.0426284	0.836427	0.243491	-0.00326317	0	0.845026
Dsn1	-0.693857	4.64142	57.2233	3.89032e-14	0.040585	4.64142	0.196232	0.65778	0.235733	0.013869	0	0.674008
Dst	1.65229	5.77382	232.946	1.35823e-52	-0.028187	5.77382	0.0688799	0.792975	-0.504735	-0.000279193	0	0.803939
Dstn	0.295724	6.10602	27.2351	1.80154e-07	0.107811	6.10602	3.62146	0.0570388	-0.0993946	0.0406408	3.81813e-06	0.0695626
Dtd1	-0.0215348	4.41937	0.0208237	0.88526	-0.134382	4.41937	0.818534	0.365609	0.00669428	-0.0452839	0.891527	0.390152
Dtd2	0.101867	4.94845	1.72147	0.189504	-0.0400035	4.94845	0.265719	0.606218	-0.0309428	-0.0171273	0.211654	0.62501
Dtna	0.596368	5.21729	42.0809	8.75734e-11	-0.0768491	5.21729	0.698156	0.403404	-0.197268	-0.0219499	0	0.427375
Dtnb	0.0457954	3.85509	0.121816	0.727073	0.00704853	3.85509	0.00279309	0.957852	-0.00491094	-0.0087703	0.740455	0.960295
Dtwd2	-7.6724	3.50678	710.808	1.33521e-156	0.658795	3.50678	4.66877	0.030716	0.994667	0.00533333	0	0.0393459
Dtx2	-0.306731	7.34356	41.4558	1.20566e-10	0.00898629	7.34356	0.0355781	0.850389	0.108983	0.00204516	0	0.85866
Dtx3	0.263018	5.6848	18.7299	1.50599e-05	-0.0189909	5.6848	0.0971985	0.755218	-0.0886327	-0.00278956	3.43632e-05	0.767067
Dtx3l	-0.0759635	6.26518	2.64502	0.103875	0.017887	6.26518	0.146694	0.701715	0.0297224	0.00591055	0.121165	0.715713
Duox1	0.81068	4.8123	34.4585	4.35442e-09	-0.225407	4.8123	2.68268	0.101445	-0.252898	-0.0705586	0	0.119412
Duoxa1	-0.597035	4.76862	28.7845	8.0896e-08	-0.0574717	4.76862	0.267311	0.605141	0.199464	-0.0201334	0	0.62391
Dusp1	-0.22163	4.12733	5.00643	0.0252534	0.0659624	4.12733	0.442634	0.505854	0.0775111	0.0212395	0.0326756	0.527941
Dusp10	0.38468	4.47555	19.5643	9.72674e-06	-0.0773078	4.47555	0.789606	0.374219	-0.135117	-0.0318497	1.52725e-05	0.39838
Dusp11	-0.0377996	3.34858	0.100695	0.750998	-0.078253	3.34858	0.43159	0.51121	0.0198637	-0.0323114	0.763371	0.533027
Dusp12	0.125076	6.01088	3.40867	0.0648547	0.0074029	6.01088	0.0119219	0.913054	-0.0391085	0.0026373	0.0781992	0.918284
DUSP12	0.0485002	4.22921	0.221862	0.637625	0.0364391	4.22921	0.125433	0.723215	-0.0119114	0.016453	0.65468	0.736373
Dusp16	-0.0664095	6.19301	1.40651	0.235637	0.0149999	6.19301	0.0717609	0.78879	0.0265778	0.00544558	0.25903	0.799666
Dusp19	1.29613	5.90665	422.048	8.74328e-94	0.0022734	5.90665	0.00141893	0.969952	-0.416354	-0.000102931	0	0.971738
Dusp3	-0.811543	5.72726	238.869	6.93966e-54	0.0718825	5.72726	1.86156	0.172445	0.277054	0.021591	0	0.194755
Dusp6	0.0891823	7.1753	3.84114	0.0500094	0.036162	7.1753	0.631634	0.426756	-0.0276784	0.0126305	0.0614605	0.45041
Dusp7	-0.824661	2.96069	25.1705	5.248e-07	-0.166083	2.96069	0.990868	0.31953	0.277348	-0.0525683	3.81813e-06	0.343846
Dvl1	-0.0499857	7.67339	2.1053	0.14679	0.0216743	7.67339	0.395768	0.529283	0.021286	0.00743519	0.166287	0.55035
Dvl2	0.0409542	5.28713	0.347264	0.555666	-0.0211159	5.28713	0.0921262	0.761491	-0.0135753	-0.00508322	0.575863	0.77318
Dym	-0.241663	4.07371	4.61001	0.0317859	0.125222	4.07371	1.23716	0.266018	0.0870826	0.0438818	0.0405066	0.290655
Dync1h1	0.0350978	10.1406	2.52981	0.111714	-0.018237	10.1406	0.683037	0.408543	-0.0083032	-0.00660326	0.129641	0.432366
Dynll1	0.539321	3.24895	18.874	1.39646e-05	-0.0700273	3.24895	0.319378	0.571982	-0.18235	-0.0301379	3.43632e-05	0.591654
Dynll2	-0.0125896	7.61797	0.0948445	0.758106	-0.0241764	7.61797	0.349805	0.554224	0.00844168	-0.00813638	0.770198	0.574457
Dynlrb1	-0.297369	7.73773	63.7278	1.42857e-15	-0.0317639	7.73773	0.727247	0.393777	0.106105	-0.0112912	0	0.417765
Dyrk1a	0.0066468	3.16038	0.00171545	0.966963	0.118091	3.16038	0.540282	0.462316	-0.00123278	0.0394407	0.969001	0.485258
Dyrk2	0.0812337	5.59231	1.46614	0.225956	0.0501029	5.59231	0.557791	0.455152	-0.0254064	0.0179239	0.249313	0.478294
Dzank1	0.827265	3.84035	42.1579	8.41937e-11	0.241335	3.84035	3.57921	0.058507	-0.279954	0.0809848	0	0.0712655
E030011O05Rik	-0.0389395	5.17058	0.140379	0.707904	-0.107322	5.17058	1.06684	0.301659	0.0180934	-0.037445	0.722311	0.325939
E030018B13Rik	0.575173	3.89256	13.8889	0.000193939	-0.025001	3.89256	0.0262469	0.871299	-0.181013	-0.00736801	0.000301633	0.878297
E030030I06Rik	-0.776327	3.63772	18.9686	1.32891e-05	-0.197329	3.63772	1.2178	0.269793	0.245091	-0.0586883	3.05451e-05	0.294443
E130208F15Rik	-0.142128	5.78926	5.8607	0.0154826	0.024644	5.78926	0.176086	0.674758	0.0538478	0.00856069	0.020805	0.690002
E130218I03Rik	-0.479067	3.02313	8.76996	0.00306231	0.096354	3.02313	0.355895	0.550795	0.159787	0.0372193	0.00459322	0.571075
E130308A19Rik	-0.386073	2.78043	5.25734	0.0218544	0.0585799	2.78043	0.119529	0.729546	0.132685	0.0181442	0.0286093	0.742379
E130309D02Rik	-0.181897	2.66083	1.011	0.314663	-0.159843	2.66083	0.779805	0.377201	0.0700212	-0.0585098	0.338451	0.401446
E230015J15Rik	-0.0272643	5.02237	0.115989	0.733426	-0.149029	5.02237	3.46136	0.0628186	0.0140861	-0.0493779	0.746564	0.0764085
E2f1	-2.5664	5.22855	45.8827	1.2555e-11	0.554709	5.22855	2.21393	0.13677	0.561401	0.1074	0	0.157216
E2f2	0.604599	3.39509	17.3141	3.16819e-05	-0.0313092	3.39509	0.0486465	0.825435	-0.206155	-0.016968	7.63627e-05	0.834346
E2f5	0.0436096	4.16733	0.148128	0.70033	-0.0734856	4.16733	0.420318	0.516778	-0.013763	-0.029018	0.715041	0.538445
E2f7	-0.395841	3.63662	11.0408	0.000891274	0.00213915	3.63662	0.000379019	0.984467	0.142497	0.00375943	0.00144707	0.985174
E430024P14Rik	3.00338	5.15396	653.06	4.82528e-144	-0.212758	5.15396	3.26084	0.0709526	-0.775545	-0.0289438	0	0.0857477
E430025E21Rik	0.00684217	5.07152	0.00499979	0.943629	0.0653656	5.07152	0.459356	0.497925	0.00286312	0.0234161	0.946664	0.520248
E4f1	0.164816	3.05403	0.997149	0.318001	-0.00966002	3.05403	0.00350722	0.952775	-0.0596395	-0.00850952	0.341822	0.955397
Ebag9	0.176725	5.02316	3.72384	0.053641	0.0180169	5.02316	0.0386141	0.844215	-0.0585595	0.00442933	0.065523	0.852544
Ebf1	-0.361699	3.37826	6.17205	0.0129784	-0.139049	3.37826	0.913308	0.339238	0.12681	-0.0529392	0.0174947	0.363437
Ebf3	0.306481	3.51908	6.21841	0.0126428	0.0847896	3.51908	0.474836	0.490771	-0.0987247	0.0230474	0.0171587	0.513207
Echs1	-0.204672	6.80956	20.8037	5.08834e-06	-0.0126199	6.80956	0.0790612	0.778574	0.0756385	-0.00402992	1.14544e-05	0.789858
Eci1	-0.0513278	6.831	0.94143	0.33191	-0.00889966	6.831	0.0283337	0.866327	0.0201106	-0.00437184	0.355999	0.873471
Ecm1	-0.211456	4.03724	4.02505	0.0448292	0.196704	4.03724	3.48161	0.0620544	0.0767951	0.0637508	0.0554279	0.0755189
Ecscr	-0.0554385	5.14704	0.374253	0.540695	-0.0595415	5.14704	0.433499	0.510277	0.0170155	-0.0256084	0.561113	0.532118
Edem2	0.399938	5.46288	41.3659	1.26242e-10	0.0395448	5.46288	0.403736	0.525166	-0.133264	0.0138684	0	0.546394
Edem3	0.0654233	8.48357	4.8872	0.0270566	-0.00644705	8.48357	0.0474519	0.827558	-0.019033	-0.00232668	0.0348787	0.836423
Eed	-0.000262456	5.40702	1.34274e-05	0.997076	0.0633319	5.40702	0.702702	0.401877	0.00430291	0.0216829	0.997293	0.425814
Eef1a1	-3.08614	13.1428	18848.7	0	-0.0144501	13.1428	0.477162	0.489711	0.790548	-0.00207006	0	0.512241
Eef1e1	-0.0817333	5.75034	1.50672	0.219641	-0.0644901	5.75034	0.938307	0.332714	0.0294786	-0.02288	0.243005	0.35716
Eef1g	0.0833818	7.60717	4.48745	0.0341445	0.0693357	7.60717	3.10288	0.0781538	-0.0251383	0.0237301	0.0432327	0.0938268
Efcab14	0.300805	6.68479	54.4694	1.57884e-13	0.0174253	6.68479	0.182693	0.669069	-0.0993139	0.00598966	0	0.68466
Efcc1	0.0113004	4.14051	0.00935857	0.922933	-0.114177	4.14051	0.966159	0.32564	-0.00586506	-0.036175	0.926913	0.35015
Efemp1	-0.613319	6.7604	118.428	1.39727e-27	0.0747379	6.7604	1.76199	0.184377	0.211583	0.023236	0	0.207649
Efemp2	-0.00102213	3.12944	1.051e-05	0.997413	0.210946	3.12944	1.38276	0.239632	0.00612957	0.0781958	0.997625	0.264478
Efhd1	0.200017	3.30128	1.87071	0.171393	-0.142921	3.30128	0.950853	0.329502	-0.0706085	-0.0482713	0.192587	0.353995
Efr3a	0.598773	7.98559	191.798	1.28797e-43	0.00656626	7.98559	0.0231611	0.879039	-0.199662	0.00181431	0	0.88562
Efr3b	0.120965	4.71376	1.73328	0.187992	0.0927174	4.71376	1.01884	0.312793	-0.0355615	0.0343271	0.210028	0.337279
Eftud1	0.0960599	4.46751	1.36026	0.243492	-0.057683	4.46751	0.490671	0.483628	-0.0240079	-0.0233137	0.267197	0.506533
Eftud2	-0.052735	6.17013	0.945819	0.330786	0.0321602	6.17013	0.351697	0.553154	0.0200849	0.00968031	0.35488	0.573415
Egfl8	-0.372465	3.74117	11.507	0.000693343	0.127297	3.74117	1.34463	0.24622	0.135612	0.0525923	0.0011378	0.271168
Egfr	0.055457	6.93802	1.61529	0.20375	-0.0609616	6.93802	1.95186	0.162387	-0.0143395	-0.0209398	0.226541	0.184229
Egln1	-0.286486	4.60134	10.0639	0.00151206	0.109484	4.60134	1.46841	0.225598	0.101238	0.0329853	0.00237488	0.250019
Egr1	-0.046985	4.03612	0.189164	0.663613	0.181542	4.03612	2.8438	0.091727	0.00646113	0.0517973	0.679639	0.108866
Ehbp1	0.169519	5.42552	1.06593	0.301867	-0.010487	5.42552	0.00405264	0.949241	-0.0503002	-0.00200116	0.325962	0.952105
Ehbp1l1	0.169002	8.38031	23.0157	1.60684e-06	0.0161973	8.38031	0.211475	0.645614	-0.0549852	0.00523159	7.63627e-06	0.662366
Ehd3	-0.427198	5.80055	33.7525	6.25897e-09	0.0331342	5.80055	0.203674	0.651771	0.14924	0.00780933	0	0.668307
Ehd4	-0.0351725	6.42607	0.551421	0.457738	-0.101327	6.42607	4.57694	0.0324051	0.0159365	-0.0353856	0.479951	0.0411786
Ehhadh	-0.616278	4.6569	12.2573	0.000463438	0.102439	4.6569	0.343038	0.558081	0.192986	0.0337629	0.000752173	0.578348
Ehmt2	0.149657	8.37353	16.2068	5.67886e-05	0.00255011	8.37353	0.00471083	0.94528	-0.0479994	0.000833096	0.000106908	0.948299
Ei24	-0.811698	8.22367	390.518	6.3827e-87	-0.0844523	8.22367	4.25867	0.0390504	0.276139	-0.0268072	0	0.0489828
Eif1b	0.351547	6.02472	28.6519	8.66296e-08	-0.00881754	6.02472	0.0181331	0.892881	-0.118587	-0.00507898	3.81813e-06	0.899007
Eif2ak2	0.148539	3.5406	1.12954	0.287873	-0.0678186	3.5406	0.23531	0.627614	-0.0475036	-0.0255491	0.311774	0.645165
Eif2ak3	-0.05395	5.58194	0.812068	0.36751	-0.0226558	5.58194	0.143101	0.705217	0.0231171	-0.00621417	0.39105	0.718905
Eif2ak4	0.10285	6.64487	3.9029	0.0482028	0.0700615	6.64487	1.81162	0.178314	-0.0307169	0.0246033	0.0594025	0.201059
Eif2b1	0.295897	6.02052	17.3105	3.17433e-05	-0.00362617	6.02052	0.00259468	0.959375	-0.0970534	-0.00148271	7.63627e-05	0.961601
Eif2b3	-0.0267337	5.71827	0.133364	0.714969	-0.0181348	5.71827	0.0614584	0.804206	0.0102725	-0.007532	0.729012	0.814366
Eif2b5	0.0654051	6.84381	2.19716	0.138265	-0.0113602	6.84381	0.0663005	0.796801	-0.0182459	-0.00375325	0.157334	0.807421
Eif2d	-0.0246339	4.43509	0.0473528	0.827735	0.056445	4.43509	0.247615	0.618759	0.0146478	0.0175891	0.836595	0.636838
Eif2s1	-8.38596	5.79778	554.708	1.19079e-122	0.147646	5.79778	0.211711	0.645429	0.994093	0.000618628	0	0.662194
Eif2s2	-2.49824	6.23512	13.2106	0.000278363	-1.04879	6.23512	2.04357	0.15285	0.466245	-0.0930908	0.000473449	0.174122
Eif3a	5.0389	3.81046	287.006	2.23345e-64	0.0202315	3.81046	0.00433101	0.947529	-0.930146	-0.00302146	0	0.950582
Eif3e	0.189626	10.0748	68.5322	1.24824e-16	-0.0287324	10.0748	1.57419	0.2096	-0.0616159	-0.0099826	0	0.233624
Eif3f	0.150807	7.45876	14.6888	0.000126795	0.0402771	7.45876	1.04798	0.305973	-0.0479803	0.0135547	0.000202361	0.330353
Eif3h	0.19091	7.87395	30.8577	2.77656e-08	0.00939645	7.87395	0.0747799	0.7845	-0.0624314	0.00275759	0	0.79547
Eif3i	0.0415267	7.6362	1.24989	0.263573	-0.00654206	7.6362	0.03104	0.860151	-0.0108829	-0.00316308	0.287467	0.867725
Eif3j1	-0.0403596	6.70938	0.627553	0.428254	-0.00329771	6.70938	0.00418677	0.948409	0.0181549	-0.00118925	0.451651	0.951422
Eif3m	-0.0806731	6.45516	2.51149	0.113019	0.0271773	6.45516	0.285092	0.593383	0.0318061	0.00939686	0.131077	0.612295
Eif4a-ps4	-3.12382	6.13976	1711.37	0	-0.122649	6.13976	2.55937	0.109642	0.793668	-0.0165705	0	0.128392
Eif4a1	1.15653	9.55061	1882.67	0	-0.0134961	9.55061	0.260221	0.609969	-0.376873	-0.00405977	0	0.628488
Eif4a2	0.0110489	8.61291	0.145806	0.702576	0.00528575	8.61291	0.0333712	0.855051	0.000325989	0.00166028	0.717065	0.862822
Eif4e	2.74483	6.82392	1932.09	0	0.00435735	6.82392	0.00481512	0.944678	-0.736746	2.87778e-05	0	0.947741
Eif4e2	0.0583447	6.24147	1.38821	0.238708	-0.0492918	6.24147	0.990583	0.3196	-0.0174478	-0.0157459	0.262161	0.343934
Eif4ebp2	0.237615	3.12489	2.5052	0.113471	-0.0928913	3.12489	0.381685	0.536703	-0.0774203	-0.027987	0.131523	0.557551
Eif4ebp3	-0.0358728	3.77668	0.0770692	0.781309	-0.0454355	3.77668	0.124493	0.724212	0.0129852	-0.0161251	0.792328	0.737293
Eif4g1	-0.43109	9.09284	197.963	5.8122e-45	-0.000422841	9.09284	0.000191816	0.98895	0.152084	-0.000302161	0	0.989492
Eif4g2	0.0408988	9.01062	2.18317	0.139527	-0.00399974	9.01062	0.0208803	0.885106	-0.0105218	-0.00190109	0.15872	0.891336
Eif4g3	0.249138	5.21048	12.7647	0.000353215	-0.0270482	5.21048	0.150338	0.698213	-0.0814905	-0.00640009	0.00057272	0.71251
Eif4h	0.0600611	8.75819	3.92223	0.0476516	-0.00319184	8.75819	0.0110763	0.916182	-0.0168571	-0.0011484	0.058742	0.921117
Eif5a2	0.141989	5.39648	3.47375	0.0623499	0.0240753	5.39648	0.100088	0.751725	-0.0399479	0.0131306	0.0754082	0.763593
Eif6	0.385766	7.25108	71.1912	3.24228e-17	-0.00627349	7.25108	0.0188259	0.890867	-0.129513	-0.00254748	0	0.897002
Elac1	-0.10588	4.38463	1.67957	0.194982	-0.000918159	4.38463	0.000128577	0.990953	0.0382481	0.000350703	0.217183	0.991329
Elac2	0.0146762	4.68274	0.029631	0.86333	0.0293761	4.68274	0.118434	0.730739	-0.00254475	0.00990708	0.870378	0.74349
Elf2	0.202505	5.79908	11.1168	0.000855508	0.0126985	5.79908	0.0436294	0.834545	-0.0672045	0.00320655	0.00140889	0.843128
Elk3	0.0718709	6.60048	2.05991	0.151219	0.000842994	6.60048	0.000284285	0.986548	-0.0211384	0.000102018	0.171163	0.987274
Elk4	0.0171404	6.47715	0.123482	0.725288	-0.0397834	6.47715	0.665387	0.414665	-0.00174811	-0.0138517	0.738927	0.438265
Elmo1	-0.0770028	3.20311	0.257408	0.611906	0.0971806	3.20311	0.408135	0.522918	0.0376711	0.0381089	0.629923	0.544199
Elmo2	0.284125	4.81246	7.7885	0.00525798	0.0420839	4.81246	0.171344	0.67892	-0.0947282	0.0168661	0.00748736	0.693908
Elmod2	0.239157	8.08146	45.2363	1.74635e-11	-0.0356295	8.08146	1.00461	0.316197	-0.0792058	-0.0136355	0	0.340566
Elmsan1	-0.653866	4.13013	34.3776	4.53916e-09	-0.0631347	4.13013	0.319936	0.571646	0.223929	-0.0188852	0	0.591334
Eln	0.278329	6.65216	26.3555	2.84006e-07	0.0651316	6.65216	1.44339	0.229591	-0.0908864	0.020001	3.81813e-06	0.254108
Elovl1	-0.180156	5.88206	7.1887	0.0073364	0.0326619	5.88206	0.236178	0.62698	0.0650391	0.0106794	0.0102059	0.644593
Elovl5	-0.0140594	7.95362	0.143735	0.704596	0.0258275	7.95362	0.48493	0.486197	0.00904501	0.0088935	0.719012	0.509072
Elp2	0.236628	4.23605	2.81088	0.0936272	0.0558995	4.23605	0.156382	0.692509	-0.0727147	0.0145235	0.109974	0.70718
Elp4	-0.129985	4.82302	2.30769	0.128735	0.107159	4.82302	1.56826	0.210459	0.0514706	0.0392293	0.147449	0.234525
Elp5	-0.13198	7.1254	6.563	0.0104121	-0.034569	7.1254	0.450212	0.502234	0.0501566	-0.0119501	0.0142035	0.524535
Eltd1	0.245557	7.51379	36.63	1.42817e-09	-0.0156463	7.51379	0.148871	0.699617	-0.0799469	-0.00560253	0	0.713789
Emb	-0.0556414	6.65162	0.86666	0.351882	-0.0486146	6.65162	0.661153	0.416153	0.0200692	-0.0144845	0.375727	0.439849
Emc1	0.363025	5.58994	22.4172	2.19401e-06	0.0140064	5.58994	0.0335378	0.854693	-0.122642	0.00401449	1.14544e-05	0.862436
Emc10	0.384319	8.00438	135.677	2.34829e-31	0.00262646	8.00438	0.00634297	0.936521	-0.129062	0.000397981	0	0.940162
Emc2	0.07846	8.22567	4.73921	0.0294826	0.00426944	8.22567	0.0140244	0.905731	-0.0241438	0.00057674	0.0377843	0.911095
Emc9	0.420728	3.10672	7.96587	0.00476676	0.137839	3.10672	0.860817	0.35351	-0.140528	0.0448159	0.00682301	0.378194
Emcn	0.264675	5.66734	11.9839	0.000536621	-0.150014	5.66734	3.85203	0.0496859	-0.0857495	-0.0515119	0.00090108	0.0611551
Eme1	0.0708518	6.27809	1.94379	0.163257	0.000373263	6.27809	5.38923e-05	0.994143	-0.020887	-0.000241269	0.183839	0.994376
Eme2	0.295791	7.01564	44.857	2.11957e-11	-0.0123173	7.01564	0.0777577	0.780359	-0.0976488	-0.00359381	0	0.791579
Emilin2	-0.139785	5.99961	4.98321	0.0255944	0.0888691	5.99961	2.01545	0.155705	0.0473401	0.0335468	0.033088	0.177104
Eml1	-0.106603	6.10023	2.41089	0.120494	0.056193	6.10023	0.670262	0.41296	0.0394397	0.0206643	0.138896	0.436566
Eml3	-0.300143	3.49508	3.57851	0.0585318	-0.164308	3.49508	1.06581	0.301893	0.106096	-0.0464253	0.0710669	0.326195
Eml5	7.12488	3.6314	921.169	2.45409e-202	-0.151193	3.6314	0.174572	0.67608	-0.990478	-0.00204987	0	0.691235
Eml6	0.367854	5.16344	24.9329	5.93614e-07	0.104302	5.16344	2.00254	0.157035	-0.121982	0.036336	3.81813e-06	0.178475
Emp1	0.134036	10.0629	17.4265	2.98632e-05	-0.00559122	10.0629	0.0303344	0.861734	-0.0425863	-0.00218832	7.25446e-05	0.869145
Enc1	-0.480728	7.51827	114.044	1.27418e-26	-0.00876139	7.51827	0.0379594	0.845525	0.167536	-0.00433532	0	0.853891
Eno1	1.08835	7.28505	694.717	4.21212e-153	-0.0376838	7.28505	0.833861	0.361159	-0.355074	-0.0111909	0	0.385819
Eno3	-0.192042	4.11783	1.42616	0.232392	0.213574	4.11783	1.77264	0.183056	0.0677132	0.0825032	0.255758	0.206294
Enox1	0.154417	3.52661	1.24873	0.263796	-0.192013	3.52661	1.93575	0.164131	-0.0466096	-0.0729616	0.287719	0.186046
Enpep	-0.614066	8.407	298.698	6.33108e-67	-0.0166857	8.407	0.221388	0.637985	0.214119	-0.0047934	0	0.654936
Enpp1	-0.165677	4.91228	2.44347	0.118015	-0.0999174	4.91228	0.886315	0.346478	0.0600693	-0.0322151	0.136407	0.370798
Enpp2	-0.0435138	8.01387	0.363776	0.546416	-0.04953	8.01387	0.471119	0.492473	0.0193403	-0.0170657	0.56697	0.514933
Enpp3	0.255679	3.9147	2.53865	0.111089	0.0612862	3.9147	0.145904	0.702481	-0.0768294	0.0185967	0.128915	0.716355
Enpp4	0.219873	4.81834	7.78611	0.00526495	0.0323907	4.81834	0.168249	0.681673	-0.0768699	0.00702907	0.007495	0.696592
Enpp5	-5.08556	5.49762	1149.38	6.10631e-252	-0.320566	5.49762	4.22579	0.0398141	0.939728	-0.0137825	0	0.0499336
Eny2	0.00499815	2.82947	0.0011643	0.97278	-0.168901	2.82947	1.22209	0.26895	0.00672281	-0.0504553	0.974541	0.293649
Ep300	0.129676	5.0037	1.99038	0.158301	0.124691	5.0037	1.84146	0.17478	-0.0408095	0.0431171	0.17857	0.19721
Epas1	1.58097	6.00174	434.224	1.95652e-96	0.076974	6.00174	1.03622	0.308702	-0.491331	0.0185767	0	0.33317
Epb4.1	0.677726	7.38918	184.673	4.62507e-42	0.0134793	7.38918	0.0731549	0.786797	-0.226749	0.00426289	0	0.797769
Epb4.1l1	0.107986	9.33496	11.1723	0.000830263	-0.0109046	9.33496	0.113942	0.735701	-0.0338764	-0.00424181	0.00138216	0.748179
Epb4.1l2	0.596548	8.48515	170.386	6.09355e-39	-0.0804588	8.48515	3.11523	0.0775635	-0.198541	-0.0280508	0	0.0931434
Epb4.1l4a	-0.27176	4.10273	4.74963	0.0293045	0.0500655	4.10273	0.161461	0.687815	0.0897657	0.0160056	0.0375895	0.702621
Epc1	0.107751	4.66573	1.07544	0.29972	-0.0722307	4.66573	0.48367	0.486764	-0.0338661	-0.0278685	0.323915	0.509561
Epha4	0.454991	4.48317	17.0007	3.73653e-05	-0.140548	4.48317	1.6213	0.202911	-0.15001	-0.0456107	8.3999e-05	0.226988
Ephb2	0.0990033	5.56656	2.11252	0.146098	0.035235	5.56656	0.267513	0.605005	-0.0318743	0.00937455	0.165619	0.62378
Ephb3	-0.278458	3.12352	3.86925	0.0491785	0.0276673	3.12352	0.0379273	0.845589	0.0966929	0.00357899	0.06059	0.853941
Ephx1	-0.263056	6.67223	31.2511	2.26723e-08	0.0770592	6.67223	2.6812	0.101539	0.094988	0.0275491	0	0.119515
Epm2aip1	-0.0316239	4.37333	0.12879	0.71969	0.0477974	4.37333	0.293575	0.587938	0.0195402	0.0164521	0.73359	0.60708
Epn1	-0.0313494	5.09696	0.105209	0.745665	0.0870744	5.09696	0.81392	0.366964	0.0106785	0.0284079	0.758373	0.391443
Eprs	-0.0482181	9.81692	3.47601	0.0622648	-0.00109618	9.81692	0.00179705	0.966187	0.0205578	-0.000842782	0.0753013	0.968183
Eps15	-7.57172	4.1809	1192.68	2.38165e-261	-0.57271	4.1809	2.6342	0.104585	0.992018	-0.00480742	0	0.122722
Ept1	7.57269	2.70275	579.738	4.27597e-128	0.0591278	2.70275	1.32287e-10	0.999991	-1	0	0	0.999775
Eral1	-0.0526602	4.84196	0.474068	0.491121	0.0391596	4.84196	0.262125	0.608664	0.0264363	0.0185072	0.512672	0.627228
Erbb2ip	-0.129974	6.89095	10.5103	0.00118711	0.0216431	6.89095	0.291414	0.589316	0.0494529	0.00707596	0.00189761	0.608305
Erbb3	-0.0536721	5.23603	0.283955	0.594121	0.160245	5.23603	2.52042	0.112381	0.0360547	0.037886	0.612761	0.131458
Erc1	0.112596	7.13792	7.41913	0.00645341	0.0362744	7.13792	0.770176	0.380163	-0.035807	0.0119117	0.00914061	0.404367
Ercc1	0.275132	5.20919	14.4585	0.00014328	-0.115808	5.20919	2.5603	0.109577	-0.0926948	-0.0376557	0.000232906	0.128308
Ercc2	-0.0928939	3.36292	0.569271	0.450549	0.123319	3.36292	1.00444	0.316238	0.0321798	0.0388769	0.472914	0.340604
Ercc6l2	-0.128461	5.20073	4.74448	0.0293925	0.0215296	5.20073	0.133295	0.715039	0.0474541	0.00868787	0.0376697	0.728408
Erf	-0.0271616	3.51718	0.0450211	0.831965	-0.137512	3.51718	1.16647	0.280127	0.0107544	-0.0590353	0.840696	0.304492
Erg	0.0171128	4.50405	0.0300152	0.862456	0.0644045	4.50405	0.42831	0.512819	0.00394288	0.0242905	0.869519	0.534615
Ergic1	0.29973	9.37565	129.064	6.56708e-30	-0.0270043	9.37565	1.04863	0.305823	-0.0997581	-0.00967604	0	0.330257
Ergic3	0.119917	7.03308	7.48495	0.00622169	0.0151268	7.03308	0.119147	0.729961	-0.037575	0.00499691	0.00888098	0.742761
Erich1	0.0147202	4.29704	0.0185483	0.891669	-0.107014	4.29704	0.987624	0.320324	-0.000848957	-0.0361632	0.897701	0.344602
Erlin2	-0.0346455	6.98465	0.650526	0.419925	0.00265804	6.98465	0.00383198	0.95064	0.0169844	0.00128746	0.443675	0.953419
Ern1	-0.255369	5.92018	17.0871	3.57045e-05	-0.0477889	5.92018	0.598401	0.439189	0.0939963	-0.0183083	8.3999e-05	0.462559
Ero1l	0.201019	5.43288	4.48248	0.034244	-0.0491575	5.43288	0.268598	0.604274	-0.0669003	-0.0180023	0.0433206	0.622978
Ero1lb	7.7482	3.48279	777.665	3.87421e-171	-0.562608	3.48279	3.71687	0.0538652	-0.993548	-0.00645161	0	0.0660957
Erp44	-0.0526486	6.14791	1.03549	0.308874	0.0351026	6.14791	0.460329	0.49747	0.0218528	0.0117839	0.332758	0.519824
Errfi1	-0.170389	4.61257	4.22383	0.0398601	-0.0284571	4.61257	0.118182	0.731015	0.0688679	-0.000264286	0.0496701	0.74375
Esam	0.134981	4.45475	2.0731	0.149916	-0.00864767	4.45475	0.00838008	0.927061	-0.0468322	0.000399563	0.169666	0.931457
Esco1	0.0293113	5.1121	0.184669	0.667391	0.0762068	5.1121	1.24859	0.263823	-0.00649277	0.0280877	0.683454	0.288559
Esf1	0.138377	5.34458	4.24053	0.0394699	0.00698265	5.34458	0.010765	0.917364	-0.0454463	0.00132569	0.0491356	0.922236
Esyt1	-0.415053	10.9857	229.171	9.04122e-52	0.0212344	10.9857	0.601614	0.437963	0.146291	0.00679085	0	0.461441
Esyt2	0.325902	6.41874	56.3235	6.14773e-14	0.0350378	6.41874	0.649884	0.420154	-0.110299	0.0106733	0	0.443969
Etf1	-0.0197801	5.97682	0.170444	0.679717	0.0731715	5.97682	2.3325	0.126698	0.0124359	0.0259919	0.695328	0.147075
Etfb	-0.0962685	9.21626	13.0632	0.000301154	-0.00904418	9.21626	0.11531	0.734177	0.0370458	-0.00344648	0.000500176	0.74669
Ethe1	-0.24867	5.32639	15.1781	9.78317e-05	-0.0894789	5.32639	1.96485	0.160996	0.0850683	-0.0309334	0.00016418	0.182828
Etnk1	0.102511	8.98179	11.706	0.000623004	-0.0123083	8.98179	0.168758	0.681218	-0.0317001	-0.0045047	0.00104235	0.696206
Etohd2	-0.0653008	6.20078	1.50635	0.219697	0.00320085	6.20078	0.00363239	0.951941	0.0278561	0.00259758	0.243051	0.954679
Etv5	-3.36849	6.01939	1351.16	8.63977e-296	-0.11656	6.01939	1.61751	0.203439	0.821587	-0.0138121	0	0.227496
Etv6	0.00549019	6.43737	0.00895563	0.924605	-0.0471086	6.43737	0.660917	0.416237	0.00331611	-0.0161601	0.928547	0.439933
Evi5	0.104196	3.77815	0.964215	0.326127	-0.236448	3.77815	4.96205	0.0259094	-0.0356059	-0.0786472	0.34997	0.0335499
Evl	0.594006	4.33161	9.51613	0.00203674	-0.16686	4.33161	0.748605	0.386918	-0.177261	-0.0471759	0.00313851	0.410995
Evpl	-0.0735361	3.9039	0.251688	0.615889	-0.0295404	3.9039	0.0403867	0.840726	0.0371854	-0.00975115	0.633849	0.849115
Ewsr1	-0.191244	2.80363	1.2172	0.26991	-0.231373	2.80363	1.78252	0.18184	0.0688974	-0.0723833	0.293714	0.20477
Exd1	0.345656	5.88541	23.098	1.5395e-06	-0.0442183	5.88541	0.37862	0.538343	-0.112708	-0.016303	7.63627e-06	0.559063
Exoc1	6.41985	3.47563	786.279	5.19019e-173	0.0302657	3.47563	0.00320683	0.954841	-0.984548	-0.00092234	0	0.95739
Exoc3	0.329909	7.43315	63.5607	1.55503e-15	0.0293636	7.43315	0.503968	0.477762	-0.10965	0.00999272	0	0.500565
Exoc4	-0.572616	3.81393	20.9612	4.68684e-06	0.102672	3.81393	0.671378	0.412571	0.194589	0.0257996	1.14544e-05	0.43618
Exoc5	-0.199563	7.48775	29.31	6.1677e-08	0.006275	7.48775	0.0290172	0.864739	0.0733499	0.00234379	0	0.871936
Exoc7	-0.0776397	7.16975	2.47886	0.115386	0.0701576	7.16975	2.02408	0.154823	0.0306766	0.0237202	0.133673	0.17623
Exoc8	0.226754	4.21539	5.74405	0.0165446	0.160971	4.21539	2.8906	0.0890977	-0.0804598	0.048989	0.0220268	0.105942
Exog	-0.317668	4.64529	11.0067	0.000907833	0.143583	4.64529	2.24974	0.133637	0.11468	0.0519436	0.00148144	0.153982
Exosc1	0.0928112	5.18038	1.69708	0.19267	-0.0526467	5.18038	0.546048	0.459937	-0.0261123	-0.0177643	0.214885	0.482983
Exosc5	0.280551	5.94746	20.3143	6.57073e-06	0.0372933	5.94746	0.359194	0.548954	-0.0906996	0.0142949	1.14544e-05	0.569372
Exosc8	-0.0954121	3.65632	0.623241	0.429845	-0.327159	3.65632	7.34169	0.00673734	0.0340065	-0.111551	0.453178	0.00934679
Exosc9	-0.136586	6.34324	6.211	0.0126959	-0.0253175	6.34324	0.213462	0.644067	0.0492406	-0.00971874	0.0171969	0.660808
Ext1	-0.0778188	6.98444	3.23742	0.0719739	0.0135533	6.98444	0.0982047	0.753995	0.0310005	0.00512859	0.0862364	0.765841
Ext2	0.117757	7.05309	6.48421	0.0108837	0.0262743	7.05309	0.322812	0.569922	-0.0366224	0.00822877	0.0148144	0.589715
Extl2	-0.00915799	5.32431	0.0192028	0.889787	0.0757696	5.32431	1.31556	0.25139	0.00645902	0.0274195	0.896021	0.276196
Extl3	-4.65897	4.40014	858.822	8.7821e-189	-0.36839	4.40014	4.33805	0.0372697	0.919985	-0.0207293	0	0.0469401
Eya2	0.175744	3.85339	2.07	0.150221	0.0245614	3.85339	0.0396938	0.84208	-0.0621871	0.00979828	0.169999	0.850348
Eya3	-0.24603	7.63003	30.2721	3.75479e-08	-0.0566141	7.63003	1.60381	0.205364	0.0877946	-0.0191445	0	0.229371
Ezh1	-0.278296	2.85544	2.37653	0.123171	0.109634	2.85544	0.368425	0.543864	0.0910751	0.0417647	0.141664	0.564454
Ezr	-0.014179	6.08808	0.0524164	0.818911	-0.0244942	6.08808	0.156121	0.692753	0.0107874	-0.00736972	0.828138	0.707455
F10	0.735583	5.56	41.8366	9.92262e-11	0.181529	5.56	2.55916	0.109657	-0.239068	0.0646445	0	0.128419
F11r	0.413507	7.28498	82.5183	1.04695e-19	0.0284603	7.28498	0.391599	0.53146	-0.137658	0.0107672	0	0.552389
F2r	0.448469	5.0078	37.0846	1.13113e-09	0.0607269	5.0078	0.676177	0.410906	-0.148063	0.0198762	0	0.43463
F3	0.231793	7.97516	14.6525	0.00012926	0.112157	7.97516	3.43324	0.0638968	-0.0750484	0.0382223	0.000209997	0.077615
F7	1.33341	5.18348	177.918	1.38048e-40	0.148455	5.18348	2.18991	0.138917	-0.429269	0.0347341	0	0.159671
Fabp5	-0.000532049	6.6852	0.000118931	0.991299	0.0273997	6.6852	0.302303	0.582442	0.00902692	0.0114922	0.992074	0.601742
Fadd	0.0370019	5.35872	0.24674	0.61938	0.0917734	5.35872	1.51886	0.217793	-0.00716535	0.0322824	0.637354	0.242142
Fads1	-0.687041	7.12088	180.984	2.95582e-41	0.0545705	7.12088	1.1441	0.284788	0.238071	0.0187979	0	0.309261
Fads6	0.0187818	3.67115	0.025846	0.872277	0.115412	3.67115	0.984495	0.321091	-0.000536948	0.0420677	0.879198	0.345476
Fah	-0.829234	8.35677	367.131	7.8864e-82	0.0129073	8.35677	0.0896779	0.764587	0.282375	0.00434572	0	0.776166
Fahd2a	0.318084	5.08577	13.0537	0.000302687	-0.134959	5.08577	2.34857	0.125398	-0.105574	-0.0446696	0.000500176	0.145803
Faim	-6.77243	5.15469	1770.33	0	0.0736621	5.15469	0.108392	0.741982	0.983987	0.00143574	0	0.754215
Fam101b	0.11675	6.92702	7.12675	0.00759421	0.0340312	6.92702	0.605798	0.436374	-0.0341021	0.0141735	0.0105762	0.459848
Fam102b	-0.348646	8.66447	134.927	3.42619e-31	-0.0230895	8.66447	0.592213	0.441564	0.123434	-0.00777235	0	0.464869
Fam103a1	-0.653856	6.21834	103.987	2.03632e-24	-0.154311	6.21834	5.79703	0.0160532	0.226927	-0.0476392	0	0.0212403
Fam104a	-0.194527	5.24655	10.791	0.00101995	0.0857126	5.24655	2.09421	0.147858	0.0707021	0.0297016	0.00163416	0.168952
Fam105a	-0.545109	6.48978	65.027	7.38772e-16	-0.0367417	6.48978	0.295823	0.586513	0.188089	-0.0158036	0	0.605709
Fam107b	-0.56869	3.72771	20.6085	5.63453e-06	0.00758473	3.72771	0.0037375	0.951252	0.196497	-0.0042888	1.14544e-05	0.95403
Fam109b	-0.519461	4.49072	30.4071	3.50252e-08	0.0340846	4.49072	0.131427	0.716957	0.181604	0.0114955	0	0.730253
Fam110a	-0.540786	3.17479	9.70767	0.00183501	-0.256203	3.17479	2.17335	0.14042	0.174982	-0.0754029	0.00279869	0.161217
Fam111a	-0.154276	3.87823	2.2589	0.132848	0.0639356	3.87823	0.388405	0.533139	0.0579906	0.0178498	0.151801	0.554092
Fam114a1	-8.7475	5.18317	2258.8	0	-0.162873	5.18317	0.171524	0.678761	0.99717	-0.000375205	0	0.693751
Fam114a2	-0.0368911	5.27434	0.337927	0.561028	-0.128839	5.27434	4.12269	0.0423118	0.0176195	-0.0449282	0.581021	0.0528964
Fam117b	0.113564	5.69474	3.33235	0.0679296	-0.00595411	5.69474	0.00916635	0.923726	-0.0363757	-0.0020879	0.0817463	0.928307
Fam118a	0.102911	3.42353	0.581117	0.445875	-0.163405	3.42353	1.46327	0.22641	-0.036861	-0.0625153	0.468607	0.250794
Fam120b	0.241953	3.52093	4.7233	0.0297566	-0.136311	3.52093	1.49962	0.220731	-0.091356	-0.0529802	0.0380897	0.245166
Fam126a	-6.62198	3.65693	391.782	3.38859e-87	-0.730393	3.65693	3.99273	0.045697	0.976963	-0.0109159	0	0.0568062
Fam129a	-0.00320605	8.65362	0.0110918	0.916124	0.0329373	8.65362	1.17009	0.279382	0.00510686	0.0113601	0.920461	0.303862
Fam132a	0.4642	7.93044	107.034	4.37604e-25	-0.0357875	7.93044	0.637444	0.424638	-0.155573	-0.0130275	0	0.448562
Fam133b	0.0334298	6.28272	0.231172	0.630656	-0.010282	6.28272	0.0218669	0.882442	-0.00660102	-0.00356686	0.647853	0.888846
Fam136a	0.216984	5.55058	10.2899	0.00133763	0.0163203	5.55058	0.0581859	0.809387	-0.0707024	0.00425358	0.00214197	0.819208
Fam13c	0.254392	4.19351	3.77145	0.0521343	0.0170374	4.19351	0.0170734	0.89604	-0.0828259	0.00552053	0.0640072	0.902053
Fam149b	-0.00774065	5.29565	0.00949776	0.922364	0.0330426	5.29565	0.173327	0.677172	0.00490546	0.0101901	0.926436	0.692266
Fam151a	0.346996	3.51928	7.56459	0.00595262	0.239302	3.51928	3.58906	0.0581613	-0.126556	0.0755522	0.00852971	0.0708722
Fam151b	0.229003	5.01729	6.57383	0.0103489	0.0344331	5.01729	0.148502	0.699971	-0.0764244	0.00866894	0.0141195	0.714129
Fam160a1	0.147154	5.27867	3.36239	0.0667012	-0.039835	5.27867	0.246603	0.619477	-0.0464667	-0.0169893	0.0802763	0.637548
Fam160a2	-0.368226	3.44069	6.07321	0.0137247	0.253506	3.44069	2.87755	0.0898226	0.132134	0.0879235	0.0184645	0.106694
Fam160b1	0.167085	7.59562	24.3922	7.85866e-07	0.00985735	7.59562	0.0849247	0.770731	-0.0537887	0.00350373	7.63627e-06	0.782217
Fam161a	1.2119	4.00475	52.4168	4.48868e-13	-0.124386	4.00475	0.554113	0.456642	-0.372199	-0.0282819	0	0.479695
Fam162a	0.64258	4.64916	50.7085	1.07154e-12	0.101073	4.64916	1.2517	0.263227	-0.214824	0.0286735	0	0.287968
Fam166a	7.79161	3.62237	977.764	1.22329e-214	0.144059	3.62237	0.235522	0.627459	-0.996757	0.000465507	0	0.645047
Fam168a	-0.0509082	5.91102	1.18156	0.277038	-0.00321228	5.91102	0.0047034	0.945323	0.022224	-0.000947577	0.300953	0.948337
Fam171a1	0.0186176	3.06367	0.0193065	0.889491	0.136681	3.06367	1.04392	0.306912	-0.00375753	0.0482456	0.895708	0.331433
Fam171b	-0.383712	4.66854	14.965	0.000109523	0.0500222	4.66854	0.254389	0.614001	0.136701	0.0117746	0.000179452	0.632344
Fam172a	0.135883	3.80959	1.56264	0.211279	0.111545	3.80959	1.05363	0.304673	-0.040101	0.0384817	0.234426	0.329123
Fam173b	0.766563	6.15517	143.203	5.30803e-33	-0.022537	6.15517	0.123799	0.72495	-0.255034	-0.00767645	0	0.737996
Fam174b	0.599601	5.67099	56.5758	5.40742e-14	0.0871528	5.67099	1.19739	0.273843	-0.196599	0.0287853	0	0.298261
Fam179b	0.207696	4.50638	4.10473	0.0427633	-0.00599013	4.50638	0.00350006	0.952824	-0.0687829	-0.00580881	0.0531064	0.955458
Fam184a	-0.0140598	3.87917	0.0143102	0.90478	-0.450854	3.87917	14.6797	0.00012741	0.0152869	-0.138312	0.910007	0.000229088
Fam189a2	-0.0264815	5.09492	0.125912	0.722709	0.0915304	5.09492	1.5013	0.220471	0.0166504	0.033565	0.736427	0.244926
Fam193a	0.146732	4.19907	2.08534	0.148719	-0.0894798	4.19907	0.775983	0.378372	-0.0426203	-0.0305949	0.168368	0.402603
Fam195a	-0.208033	5.00644	3.95213	0.0468122	-0.131225	5.00644	1.57506	0.209474	0.0683775	-0.0446672	0.0577187	0.233475
Fam20b	-0.160259	5.42204	5.33399	0.0209134	0.00383594	5.42204	0.00306545	0.955846	0.0559997	0.000932772	0.0274906	0.958443
Fam21	-0.0766281	7.3502	3.2816	0.0700606	0.0301635	7.3502	0.508461	0.475806	0.0301558	0.00969481	0.0841288	0.498595
Fam213a	0.224049	9.60168	62.2771	2.98375e-15	0.0576929	9.60168	4.13198	0.0420802	-0.0735441	0.0193324	0	0.0526521
Fam213b	-1.01719	7.3824	378.425	2.74137e-84	0.0801671	7.3824	2.37115	0.123596	0.340924	0.0241386	0	0.143673
Fam214a	0.00632347	6.2373	0.0120954	0.912426	0.0807439	6.2373	1.97081	0.160362	0.00140072	0.0295838	0.916986	0.182056
Fam221b	-3.20993	2.98473	264.342	1.9412e-59	-0.137171	2.98473	0.472225	0.491965	0.805168	-0.0199815	0	0.514425
Fam227b	0.194894	2.98495	2.77105	0.0959831	0.0140034	2.98495	0.0143364	0.904693	-0.0611394	0.00507356	0.112391	0.910152
Fam3c	-0.0126474	6.48	0.0373203	0.846814	0.0558934	6.48	0.727102	0.393824	0.00930872	0.0177066	0.854735	0.417811
Fam43a	0.257963	4.59923	5.34716	0.0207561	0.0824225	4.59923	0.545821	0.46003	-0.0813073	0.0270638	0.0273111	0.483074
Fam45a	3.61368	3.53164	339.808	7.02721e-76	0.219636	3.53164	1.13813	0.286048	-0.841331	0.0216487	0	0.310514
Fam46a	0.0878436	6.85214	3.29957	0.069298	-0.0739188	6.85214	2.33645	0.126377	-0.0279899	-0.0268555	0.0832162	0.146758
Fam46b	-0.123516	4.37533	1.74446	0.186574	0.0743526	4.37533	0.631976	0.426631	0.038885	0.0265083	0.208734	0.450326
Fam46c	0.163187	4.95547	4.43687	0.0351707	0.0704718	4.95547	0.826954	0.363155	-0.0545559	0.0263214	0.0443553	0.387808
Fam49a	0.210842	6.48256	18.1251	2.06862e-05	0.00663833	6.48256	0.0179532	0.893411	-0.0676614	0.00433048	4.96357e-05	0.899434
Fam53a	0.0504433	4.69651	0.400866	0.526643	-0.0377287	4.69651	0.224085	0.635944	-0.0137226	-0.0107396	0.547223	0.653004
Fam53c	-0.213792	3.58981	3.46347	0.0627386	-0.220668	3.58981	3.68689	0.0548418	0.0774049	-0.0643201	0.07579	0.0670235
Fam57a	-0.219711	3.49398	3.16588	0.075192	-0.0161962	3.49398	0.0172347	0.895553	0.0796349	0.00021826	0.0897758	0.901599
Fam58b	-0.91153	4.35011	86.5924	1.33357e-20	0.161216	4.35011	2.69907	0.100407	0.304425	0.0496053	0	0.118293
Fam63b	0.0989467	3.2615	0.488193	0.484735	-0.107953	3.2615	0.580956	0.445938	-0.0384453	-0.0431852	0.506441	0.469214
Fam65b	0.282167	5.13749	12.4413	0.000419943	-0.00619285	5.13749	0.00595959	0.938466	-0.0966324	0.000433669	0.000683446	0.942045
Fam69a	-0.114196	4.56606	1.9044	0.167586	-0.0159128	4.56606	0.0371435	0.847173	0.0418214	-0.00785963	0.188555	0.85556
Fam73a	0.307001	4.60945	10.1006	0.00148223	-0.0127786	4.60945	0.0175467	0.894617	-0.106575	-0.00695693	0.00235197	0.90058
Fam76a	-0.15563	7.10411	12.7389	0.00035813	0.0498794	7.10411	1.30845	0.252675	0.058002	0.0162192	0.000587993	0.277429
Fam83a	-0.00229979	4.19801	0.000394406	0.984155	-0.0940199	4.19801	0.664981	0.414807	0.00549048	-0.0261494	0.985346	0.438459
Fam83d	-2.38224	3.70524	186.169	2.18117e-42	-0.0559676	3.70524	0.0819776	0.774635	0.654086	-0.009906	0	0.786043
Fam84b	0.225278	4.73105	6.41079	0.0113429	0.110249	4.73105	1.53779	0.214947	-0.0659253	0.0448589	0.0154405	0.239405
Fam86	0.291668	6.84286	44.4238	2.64447e-11	-0.0527748	6.84286	1.45408	0.227875	-0.0966849	-0.0178192	0	0.252291
Fam89b	-0.0669765	6.31774	1.78505	0.181531	0.0145953	6.31774	0.0847296	0.770988	0.0270088	0.0043494	0.203556	0.782454
Fam98c	0.0356705	5.50365	0.278144	0.59792	0.0420859	5.50365	0.38747	0.533632	-0.00775738	0.0135434	0.616308	0.554557
Fanca	0.154116	4.52512	1.30047	0.254128	-0.0495722	4.52512	0.134287	0.714028	-0.0408034	-0.0102055	0.277918	0.727389
Fancg	-0.309436	6.27684	40.5192	1.94694e-10	0.0686306	6.27684	1.99276	0.158052	0.109816	0.0234251	0	0.179601
Fancl	0.937594	5.70084	173.917	1.03212e-39	-0.0774949	5.70084	1.18903	0.275526	-0.308502	-0.0248839	0	0.299907
Fancm	0.0832959	5.2436	1.27316	0.259175	-0.0131396	5.2436	0.0316776	0.858737	-0.0262041	-0.00464585	0.282966	0.866453
Far1	0.140253	8.21695	19.0287	1.28769e-05	-0.0686988	8.21695	4.56615	0.0326098	-0.0449635	-0.0244905	2.67269e-05	0.0413848
Farp1	0.472089	6.23971	63.0429	2.02257e-15	-0.0155786	6.23971	0.0684208	0.79365	-0.160251	-0.00558998	0	0.804538
Fars2	0.233844	5.02606	9.38508	0.00218758	0.0863362	5.02606	1.27903	0.258079	-0.0773206	0.0282405	0.00340196	0.283126
Farsa	0.14565	5.32382	3.00385	0.0830667	0.0420202	5.32382	0.249958	0.617104	-0.0446725	0.0127805	0.0986148	0.635223
Farsb	0.20075	7.73431	21.772	3.07056e-06	-0.00236527	7.73431	0.00301729	0.956194	-0.0650165	-0.000810833	1.14544e-05	0.958695
Fas	0.725214	7.20353	207.729	4.298e-47	0.0738265	7.20353	2.16092	0.14156	-0.241352	0.0236855	0	0.162446
Fasn	-0.362157	5.30655	23.7736	1.08357e-06	-0.00925194	5.30655	0.0158097	0.89994	0.137097	-0.00102484	7.63627e-06	0.905639
Fastk	0.0390544	5.23622	0.295352	0.586811	0.00149566	5.23622	0.000438517	0.983293	-0.0102389	0.00270009	0.605644	0.984132
Fat4	0.0277222	5.8271	0.192839	0.660564	-0.0578276	5.8271	0.83871	0.359766	-0.00579161	-0.0194669	0.676719	0.384429
Fbf1	0.137997	4.88066	2.73023	0.098465	0.03584	4.88066	0.184455	0.667572	-0.0464286	0.0134477	0.115075	0.68327
Fbl	0.0700977	3.64251	0.309859	0.577767	-0.219141	3.64251	3.02153	0.082166	-0.0293711	-0.0650147	0.596996	0.0982177
Fbln1	0.314598	5.23059	9.82423	0.00172228	0.0796424	5.23059	0.630342	0.42723	-0.101945	0.0202818	0.00262306	0.450868
Fbln5	-0.0998873	2.96529	0.407558	0.523212	-0.170748	2.96529	1.19969	0.273384	0.0369518	-0.0649314	0.543989	0.297837
Fbln7	0.54446	5.93794	56.3319	6.1215e-14	0.0177756	5.93794	0.0595452	0.807216	-0.183807	0.00334363	0	0.81718
Fbn1	-0.00092979	7.86517	0.000693864	0.978985	0.0469387	7.86517	1.7732	0.182986	0.00365669	0.0174172	0.980402	0.206206
Fbxl14	-0.00192795	5.99125	0.00115009	0.972947	-0.0175506	5.99125	0.095102	0.757789	0.00452587	-0.00718343	0.974716	0.769507
Fbxl19	-2.73216	3.55523	208.335	3.16977e-47	1.00797	3.55523	27.6689	1.4396e-07	0.694382	0.171129	0	0
Fbxl20	-2.67731	2.80001	173.265	1.4323e-39	0.127882	2.80001	0.374372	0.540631	0.73309	0.0170733	0	0.561346
Fbxl3	8.21966	7.79915	1129.14	1.53277e-247	-0.188165	7.79915	0.736806	0.390686	-0.992752	-0.000655278	0	0.414588
Fbxo11	-0.0634163	5.86442	1.08769	0.296984	0.0765576	5.86442	1.58644	0.207836	0.022203	0.0281937	0.321174	0.23181
Fbxo21	0.698212	7.41548	98.7534	2.85983e-23	0.00574941	7.41548	0.00671702	0.934681	-0.231275	0.00203858	0	0.938444
Fbxo22	-0.110689	7.96691	7.79389	0.00524233	0.0682246	7.96691	2.96124	0.0852827	0.0420755	0.0237867	0.00746445	0.101757
Fbxo25	0.257498	6.0479	16.6573	4.47776e-05	-0.018224	6.0479	0.0834399	0.772689	-0.08507	-0.00641894	9.54534e-05	0.784088
Fbxo28	-0.164102	4.60629	4.1825	0.0408435	-0.0583758	4.60629	0.528771	0.467124	0.0590313	-0.0200192	0.0509186	0.490058
Fbxo3	-0.579763	6.21004	81.2225	2.01678e-19	-0.0695124	6.21004	1.17004	0.279394	0.201002	-0.0245812	0	0.303874
Fbxo31	0.954972	6.69529	281.791	3.05772e-63	-0.00432092	6.69529	0.0057606	0.9395	-0.315012	-0.00424327	0	0.943152
Fbxo32	-0.0480256	7.07902	0.813722	0.367022	-0.071364	7.07902	1.79663	0.18012	0.0204892	-0.0258209	0.390565	0.202873
Fbxo33	-0.0503237	5.7106	0.567994	0.451057	0.0537584	5.7106	0.647596	0.420973	0.023194	0.0155742	0.473403	0.444794
Fbxo38	0.062908	4.7581	0.379878	0.537668	-0.0193695	4.7581	0.0358898	0.849743	-0.018158	-0.0055785	0.558097	0.858015
Fbxo45	-0.20006	6.14275	12.4318	0.000422082	-0.037194	6.14275	0.429719	0.512127	0.0739726	-0.0111804	0.000687264	0.533913
Fbxo6	0.489679	5.95248	91.5372	1.09517e-21	-0.00116979	5.95248	0.000523565	0.981745	-0.162826	-0.00142971	0	0.982677
Fbxo7	-0.112383	3.80031	1.71703	0.190075	-0.0457368	3.80031	0.283983	0.594103	0.049966	-0.00789127	0.212239	0.613028
Fbxo8	0.164323	4.84154	5.21695	0.0223677	0.0247206	4.84154	0.117962	0.731255	-0.049865	0.00549452	0.0292431	0.74396
Fbxo9	0.0179205	6.36666	0.145629	0.702748	0.0243503	6.36666	0.2689	0.604071	-0.00318821	0.00945504	0.717217	0.622818
Fbxw11	0.143125	6.58529	7.561	0.00596448	0.0405784	6.58529	0.607738	0.435641	-0.0458583	0.0131079	0.00854117	0.45907
Fbxw2	-0.250457	3.78453	5.71973	0.0167753	0.0629318	3.78453	0.360041	0.548483	0.0926213	0.0216983	0.0223437	0.568944
Fbxw7	0.215652	5.42862	3.68219	0.0549965	0.129087	5.42862	1.32055	0.250493	-0.0686571	0.0441269	0.0669777	0.27528
Fbxw8	-0.191055	7.4688	29.0627	7.0074e-08	0.0505356	7.4688	2.03316	0.1539	0.0704961	0.0173168	0	0.175271
Fbxw9	0.0453831	4.11015	0.176024	0.674813	0.0642687	4.11015	0.352924	0.552462	-0.00900037	0.0206715	0.690445	0.572724
Fcgr1	-0.501759	4.01034	17.7767	2.48409e-05	0.0220589	4.01034	0.0366492	0.848181	0.169158	-0.000822614	6.49083e-05	0.856576
Fcgr2b	-0.120131	5.64064	3.07112	0.0796945	-0.0484355	5.64064	0.499379	0.479773	0.0443844	-0.0169269	0.0949265	0.502738
Fcgrt	0.304832	8.94018	66.5755	3.3675e-16	-0.0301871	8.94018	0.653768	0.418769	-0.101183	-0.0105657	0	0.442537
Fcho2	-3.09728	3.1929	140.62	1.94775e-32	-0.0438675	3.1929	0.0246749	0.87518	0.762175	-0.0084109	0	0.881955
Fchsd1	0.0784041	3.35482	0.169408	0.680638	0.174608	3.35482	0.832898	0.361436	-0.0252908	0.0484986	0.696076	0.386128
Fchsd2	-0.180566	3.50063	1.35322	0.244716	0.0154808	3.50063	0.00987612	0.920838	0.0631742	0.0010841	0.268346	0.925558
Fdft1	0.313058	3.39239	4.05994	0.043912	0.105894	3.39239	0.462973	0.496238	-0.118326	0.0324314	0.0543435	0.518564
Fdxacb1	0.0550518	3.47095	0.162295	0.687052	-0.0450294	3.47095	0.108736	0.741588	-0.0139567	-0.0150779	0.702583	0.753872
Fdxr	-0.257649	5.55156	11.0452	0.000889189	0.123766	5.55156	2.54879	0.110379	0.0923728	0.042463	0.00144707	0.129179
Fech	-0.364548	5.01352	24.3443	8.05665e-07	0.00911618	5.01352	0.0151757	0.901957	0.130586	0.00301067	7.63627e-06	0.907555
Fermt2	-0.1524	7.13156	12.2481	0.000465734	-0.0666167	7.13156	2.34065	0.126037	0.0557245	-0.0242275	0.000752173	0.146441
Fes	-0.608037	4.99478	35.0283	3.24946e-09	-0.0871642	4.99478	0.719647	0.39626	0.206492	-0.0281719	0	0.420186
Fez1	-4.91699	4.21812	173.373	1.35666e-39	0.03869	4.21812	0.0140736	0.905567	0.909848	-0.0160534	0	0.910942
Fez2	0.133252	6.67224	7.17845	0.00737846	-0.0821728	6.67224	2.73012	0.098472	-0.0425095	-0.0290163	0.0102517	0.116205
Ffar2	-0.347047	8.13918	95.1593	1.75662e-22	-0.0515599	8.13918	2.10117	0.147186	0.12484	-0.0160679	0	0.168288
Fgd2	0.26356	6.0131	19.1187	1.22836e-05	0.0595099	6.0131	0.975294	0.323363	-0.0838186	0.0215493	2.67269e-05	0.347702
Fgd4	5.48191	3.63411	549.015	2.06161e-121	-0.0821047	3.63411	0.122832	0.725983	-0.958518	-0.00630039	0	0.739034
Fgd6	-0.2356	5.05676	8.99522	0.00270687	-0.0384842	5.05676	0.240222	0.624046	0.0846387	-0.0142474	0.00411977	0.641813
Fgf1	-0.22535	9.65957	41.5758	1.13387e-10	-0.02324	9.65957	0.442513	0.505912	0.0817681	-0.00806096	0	0.527972
Fgf10	0.0683812	7.37894	3.55739	0.0592809	-0.00682375	7.37894	0.0354583	0.850639	-0.0222387	-0.00427687	0.0718573	0.85887
Fgf11	-1.55665	3.73965	130.712	2.86215e-30	0.184465	3.73965	1.82306	0.17695	0.474515	0.0480283	0	0.199597
Fgf7	-0.0330038	4.00166	0.0870978	0.7679	0.107212	4.00166	0.912356	0.33949	0.0248002	0.0427214	0.779247	0.363654
Fgfr1op2	-0.132786	8.75981	20.2351	6.84854e-06	-0.000563801	8.75981	0.000364954	0.984758	0.0497961	-0.000372428	1.14544e-05	0.985392
Fggy	0.751129	5.65011	62.0727	3.3101e-15	-0.0837598	5.65011	0.774688	0.378771	-0.245191	-0.0295443	0	0.403035
Fgr	0.13754	5.12136	2.75329	0.0970544	0.0979553	5.12136	1.39582	0.237425	-0.0371042	0.0278864	0.113563	0.262168
Fhdc1	-0.079885	3.30144	0.367095	0.544592	-0.294994	3.30144	4.99622	0.0254028	0.0467317	-0.108525	0.565065	0.0328932
Fhl3	-0.235543	4.69566	5.53095	0.0186829	0.00968365	4.69566	0.00941805	0.922689	0.0868813	0.00574086	0.0247377	0.927314
Fhod3	-0.955594	4.43202	41.9045	9.58442e-11	-0.278707	4.43202	3.54526	0.0597159	0.321974	-0.0833816	0	0.0725904
Fibin	0.320013	4.10421	10.7063	0.00106773	-0.0744362	4.10421	0.579852	0.44637	-0.107585	-0.0295235	0.00171434	0.469642
Fignl2	-0.120522	3.95775	1.28961	0.25612	0.135848	3.95775	1.6386	0.200517	0.0444826	0.0480628	0.279865	0.224476
Filip1	-0.276196	5.25986	12.7612	0.000353881	0.0409182	5.25986	0.280296	0.596507	0.105482	0.0151513	0.00057272	0.615411
Filip1l	0.0406744	6.04962	0.481798	0.487609	-0.0025738	6.04962	0.00192781	0.964979	-0.0101114	-0.00124905	0.509335	0.966958
Fip1l1	0.0526246	4.18622	0.187866	0.664699	0.0695809	4.18622	0.327592	0.567081	-0.0186509	0.024898	0.680682	0.586931
Fis1	0.450615	4.71471	15.8817	6.74258e-05	-0.00762425	4.71471	0.00462157	0.9458	-0.146834	-0.00244394	0.000118362	0.948787
Fitm2	0.242265	9.05129	74.9635	4.79492e-18	0.0350583	9.05129	1.57081	0.210089	-0.0799908	0.0121872	0	0.234166
Fiz1	-0.0324358	3.73013	0.0689267	0.792906	-0.000393222	3.73013	1.17436e-05	0.997266	0.02734	-0.00311543	0.802958	0.997392
[truncated: 4,389 more rows]

## Sheet: WAT_HighFat
genes	AG_logFC	AG_logCPM	AG_LR	AG_pval	PO_logFC	PO_logCPM	PO_LR	PO_pval	AGE	POE	AG_adj_pval	PO_adj_pval
0610009B22Rik	0.00427439	5.7895	0.00197192	0.964581	-0.0589295	5.7895	0.373315	0.541203	0.00105096	-0.0242882	0.966611	0.568103
0610009O20Rik	-0.135365	6.80186	3.29698	0.0694074	0.0055046	6.80186	0.00545887	0.941103	0.0506382	0.00158704	0.087015	0.945176
0610010K14Rik	0.413405	5.36419	12.4265	0.000423295	0.0185556	5.36419	0.0251084	0.874097	-0.138552	0.00656006	0.000760713	0.882568
1100001G20Rik	0.788583	8.076	59.0132	1.56615e-14	0.0032449	8.076	0.000970929	0.975142	-0.260035	0.00282806	0	0.976579
1110004E09Rik	0.165492	5.68402	3.9303	0.0474235	0.0849274	5.68402	1.0348	0.309034	-0.0541458	0.0263504	0.0617206	0.340964
1110008F13Rik	0.115205	8.67337	3.94825	0.0469202	0.0482521	8.67337	0.692702	0.405247	-0.0361263	0.0152462	0.0610421	0.436315
1110032A03Rik	0.180444	7.19095	7.77109	0.0053089	0.153261	7.19095	5.60667	0.0178922	-0.0586646	0.0519556	0.0080477	0.0252651
1110035H17Rik	0.190373	4.02854	1.08265	0.298105	0.369668	4.02854	4.07987	0.0433971	-0.0620006	0.124928	0.32866	0.0569066
1110038B12Rik	-0.284276	5.0293	6.79489	0.00914189	-0.0796393	5.0293	0.532492	0.465561	0.103701	-0.0289177	0.0133874	0.49528
1110057K04Rik	-0.0355112	7.60301	0.343607	0.557755	0.027726	7.60301	0.209444	0.647204	0.0149604	0.00699319	0.583288	0.669119
1110059E24Rik	0.162754	5.79967	3.78736	0.051641	-0.00462233	5.79967	0.00307177	0.955801	-0.0505725	-0.00289601	0.0665668	0.958854
1110059G10Rik	-0.0108979	4.74349	0.0071571	0.93258	0.0997466	4.74349	0.597806	0.439416	0.00901389	0.0394626	0.936667	0.469771
1190002N15Rik	-0.171321	7.42985	6.27107	0.0122725	0.0591424	7.42985	0.747488	0.387273	0.0604555	0.017698	0.0173877	0.419153
1200014J11Rik	-0.161195	3.85382	0.726674	0.393963	-0.118949	3.85382	0.39474	0.529818	0.0636342	-0.0391558	0.423752	0.557197
1300002K09Rik	-0.48015	4.0204	2.08541	0.148713	0.107864	4.0204	0.10066	0.751039	0.145587	0.0226408	0.174321	0.766781
1500011K16Rik	-1.40001	4.58573	88.4299	5.26677e-21	-0.256432	4.58573	2.94145	0.0863332	0.447251	-0.0777278	0	0.106641
1600012H06Rik	-0.155853	4.03955	1.17856	0.277649	-0.239045	4.03955	2.77874	0.0955232	0.0533825	-0.0864003	0.308315	0.116959
1600014C10Rik	-0.54681	7.66423	91.7582	9.79398e-22	0.0263212	7.66423	0.212985	0.644438	0.190489	0.00714911	0	0.666549
1700006P19Rik	0.181287	5.32612	2.70798	0.0998476	0.0902818	5.32612	0.671654	0.412476	-0.0580361	0.0287823	0.121121	0.443384
1700012B15Rik	0.127168	5.17777	1.18921	0.275489	-0.0728405	5.17777	0.390569	0.532	-0.0391107	-0.0300021	0.306059	0.559377
1700020I14Rik	-0.0580967	8.96186	1.54324	0.214136	0.0475061	8.96186	1.03189	0.309716	0.0233728	0.0147487	0.242991	0.341566
1700020L24Rik	0.355234	4.94049	10.0594	0.00151575	-0.0214052	4.94049	0.0365693	0.848345	-0.121821	-0.00916504	0.00249655	0.858269
1700021K19Rik	0.116816	7.71619	3.98424	0.0459279	-0.01641	7.71619	0.0786382	0.779151	-0.0368235	-0.00711917	0.0598937	0.793574
1700022I11Rik	0.194475	8.08124	13.4117	0.000250054	-0.0333498	8.08124	0.394516	0.529935	-0.0642118	-0.0131116	0.000484624	0.557359
1700025G04Rik	0.282622	6.25331	14.1648	0.000167476	-0.0506032	6.25331	0.45421	0.500342	-0.0927768	-0.0166915	0.000320146	0.528637
1700028K03Rik	0.365345	3.14601	4.53722	0.0331653	0.260811	3.14601	2.31111	0.128453	-0.122547	0.0921853	0.0441243	0.153244
1700034J05Rik	0.283548	5.61858	10.1797	0.00141999	0.119886	5.61858	1.81927	0.1774	-0.0926155	0.0395444	0.00237025	0.205862
1700049G17Rik	0.174645	4.65397	1.15863	0.281751	0.392771	4.65397	5.8615	0.0154756	-0.0502167	0.131037	0.312439	0.0219608
1700066M21Rik	0.210048	3.62495	1.6554	0.198225	0.0416329	3.62495	0.0649436	0.798846	-0.0712819	0.0194494	0.226707	0.811795
1700120B22Rik	0.25162	3.28641	1.91967	0.165893	0.276245	3.28641	2.31592	0.128055	-0.0767823	0.103665	0.192781	0.152856
1700121F15Rik	-0.0498763	3.64777	0.0821397	0.774418	0.05722	3.64777	0.108217	0.742184	0.0165219	0.0157668	0.788851	0.758507
1700123O20Rik	0.150218	4.85476	2.09621	0.147665	-0.00982229	4.85476	0.00900456	0.9244	-0.0480043	-0.00561043	0.173105	0.92953
1810024B03Rik	-1.38077	3.73588	46.2944	1.01753e-11	-0.0471821	3.73588	0.0531171	0.817725	0.447826	-0.0191694	0	0.82911
1810032O08Rik	-0.477607	3.88872	6.98624	0.00821389	-0.00772217	3.88872	0.00203682	0.964003	0.169387	-0.00530071	0.0120921	0.966141
1810037I17Rik	0.283691	8.43832	25.6363	4.12206e-07	0.0443824	8.43832	0.628047	0.428073	-0.094129	0.0139637	0	0.458519
1810058I24Rik	-0.724319	6.32943	81.314	1.9256e-19	0.0244015	6.32943	0.0924551	0.761079	0.248415	0.00754298	0	0.776447
2010012P19Rik	-0.309637	4.38033	6.5065	0.0107481	-0.101272	4.38033	0.69568	0.404239	0.108488	-0.0335652	0.0154669	0.435287
2010107G23Rik	-1.14671	3.6368	36.6231	1.43325e-09	0.0559652	3.6368	0.0875876	0.767267	0.377952	0.0130744	0	0.782236
2210015D19Rik	-0.366407	5.18387	14.5472	0.000136693	0.104177	5.18387	1.17522	0.278331	0.129593	0.0354971	0.0002849	0.31035
2210016F16Rik	-0.248971	4.01751	2.6795	0.101648	-0.132599	4.01751	0.760791	0.383081	0.0844486	-0.0492628	0.123186	0.414953
2210404O09Rik	-0.0275842	2.92607	0.012927	0.909478	-0.258482	2.92607	1.12358	0.289148	0.0161025	-0.0871082	0.915158	0.321356
2210408I21Rik	0.371489	4.29818	2.2103	0.137092	-0.207938	4.29818	0.693498	0.404977	-0.109935	-0.0574481	0.161632	0.436056
2210411M09Rik	0.199965	3.2758	1.4786	0.223994	-0.113063	3.2758	0.472248	0.491955	-0.06568	-0.038693	0.253091	0.520739
2310001K24Rik	0.239052	3.36831	2.10808	0.146523	0.0695179	3.36831	0.17919	0.67207	-0.0799451	0.0330755	0.17193	0.692428
2310009B15Rik	-0.491718	3.02448	4.06188	0.0438617	-0.180164	3.02448	0.544804	0.460449	0.175734	-0.0657397	0.0573795	0.490487
2310014F06Rik	-0.235919	4.06506	1.80487	0.179125	-0.00755624	4.06506	0.00188759	0.965346	0.0848523	-0.00323313	0.206817	0.967416
2310039H08Rik	-0.364731	4.81165	9.07406	0.00259261	0.0127599	4.81165	0.0110779	0.916176	0.130918	0.00700079	0.00417952	0.922116
2310047M10Rik	-0.320813	4.98383	7.51042	0.00613429	-0.100723	4.98383	0.741289	0.389248	0.111258	-0.0391199	0.00928129	0.420983
2310061I04Rik	-0.306085	3.57064	2.45186	0.117386	-0.124792	3.57064	0.405935	0.52404	0.111862	-0.0352663	0.140459	0.551711
2310067B10Rik	-0.102451	3.19008	0.207466	0.648761	0.106894	3.19008	0.225533	0.634856	0.0388069	0.0334433	0.669554	0.657482
2410002F23Rik	-1.49166	6.49907	354.096	5.43536e-79	-0.133417	6.49907	2.83757	0.0920833	0.476459	-0.0378466	0	0.113102
2410004N09Rik	0.16225	4.76418	1.67478	0.19562	-0.110448	4.76418	0.776261	0.378287	-0.0477548	-0.0367794	0.224037	0.410142
2410017I17Rik	-0.133088	7.42699	2.27405	0.131555	0.00235025	7.42699	0.00071305	0.978697	0.0489479	-0.00027583	0.155702	0.980148
2410127L17Rik	-0.310224	5.19541	11.7733	0.000600864	0.0336941	5.19541	0.138409	0.709868	0.110994	0.0107498	0.00105149	0.727979
2410131K14Rik	-0.891638	5.51227	111.417	4.79385e-26	-0.0341723	5.51227	0.162378	0.686977	0.303427	-0.0117688	0	0.706526
2510009E07Rik	-0.0248252	5.89888	0.119395	0.729691	-0.10033	5.89888	1.94946	0.162645	0.0135699	-0.0364009	0.746562	0.190034
2610002J02Rik	-0.106727	5.37553	0.991694	0.319329	0.00343562	5.37553	0.00101813	0.974545	0.0419287	-0.00225791	0.349802	0.97598
2610019F03Rik	0.157251	8.57736	8.81383	0.00298957	-0.0307109	8.57736	0.336221	0.562019	-0.0509233	-0.011914	0.00477575	0.588143
2610044O15Rik8	-0.227346	4.06063	1.48526	0.222954	-0.0433766	4.06063	0.053812	0.816558	0.072894	-0.0133307	0.252002	0.828108
2610203C22Rik	-1.10976	3.38497	36.828	1.29022e-09	-0.188056	3.38497	1.05011	0.305482	0.380909	-0.0487906	0	0.337504
2610206C17Rik	-0.571551	4.8072	20.8191	5.04771e-06	0.151147	4.8072	1.4544	0.227824	0.199815	0.048404	1.17485e-05	0.258493
2610301B20Rik	0.00163082	5.30151	0.000252443	0.987323	0.0513816	5.30151	0.256486	0.612545	0.00460419	0.0170867	0.988005	0.63657
2610305D13Rik	2.81201	5.2237	451.083	4.19263e-100	-0.034495	5.2237	0.0667413	0.796142	-0.749423	-0.00830523	0	0.809408
2610507B11Rik	-0.26192	8.23397	24.5965	7.06798e-07	0.00760742	8.23397	0.020766	0.885418	0.093949	0.00130422	0	0.893065
2700060E02Rik	-0.0829594	8.34552	2.73958	0.0978905	0.0119715	8.34552	0.0570679	0.811192	0.0325297	0.00305814	0.118909	0.823021
2700062C07Rik	-9.59407	4.58854	837.398	3.99357e-184	-0.0589709	4.58854	3.06965e-10	0.999986	1	0	0	0.99975
2700089E24Rik	0.325178	9.08054	53.357	2.78124e-13	-0.00192176	9.08054	0.00186492	0.965554	-0.108841	-0.00206729	0	0.967677
2700097O09Rik	0.0619794	3.53177	0.114137	0.735483	0.316655	3.53177	2.96378	0.0851487	-0.0132774	0.117421	0.752228	0.105419
2810021J22Rik	-0.19381	3.07686	0.953399	0.328856	-0.0173518	3.07686	0.00739109	0.931489	0.0763941	-0.00530128	0.359289	0.936262
2810025M15Rik	-2.29391	6.16153	317.8	4.36567e-71	0.0402192	6.16153	0.102106	0.749317	0.657093	0.00869229	0	0.765122
2810032G03Rik	-2.38523	3.74876	122.561	1.73989e-28	-0.164841	3.74876	0.570221	0.450171	0.67757	-0.0315424	0	0.48048
2810055G20Rik	-0.0654393	5.25075	0.271122	0.60258	-0.15606	5.25075	1.53973	0.214659	0.0296933	-0.0552371	0.625676	0.244817
2810403A07Rik	-0.143178	5.46721	2.21356	0.136802	0.082229	5.46721	0.729625	0.393005	0.0505258	0.0240689	0.161265	0.424634
2810408M09Rik	-0.483883	3.38188	4.57147	0.0325087	-0.0177067	3.38188	0.00633113	0.936581	0.173012	-0.0178515	0.0433107	0.940885
2900097C17Rik	0.393371	6.77357	37.9586	7.22628e-10	-0.0052696	6.77357	0.00678774	0.934338	-0.132577	-0.00355687	0	0.938849
3110001D03Rik	-0.0400886	5.49295	0.150481	0.698076	0.0172474	5.49295	0.0278439	0.867476	0.0156747	0.00287928	0.7167	0.876118
3110002H16Rik	-0.119383	6.16093	2.49263	0.11438	0.0218794	6.16093	0.0837294	0.772306	0.0447429	0.00608369	0.137263	0.787027
3110040N11Rik	-0.299213	5.23421	5.18051	0.0228416	0.00104598	5.23421	5.80423e-05	0.993921	0.106804	-0.00410409	0.031013	0.994393
3110043O21Rik	0.113176	9.24631	5.27427	0.0216429	0.0258478	9.24631	0.275143	0.599903	-0.0359763	0.00748844	0.0295503	0.62446
3110052M02Rik	0.262279	3.04051	0.544166	0.460711	0.111091	3.04051	0.0936618	0.759573	-0.0823218	0.0286408	0.48952	0.775143
3110053B16Rik	-0.997904	3.57718	12.6537	0.000374821	-0.222905	3.57718	0.644429	0.422112	0.318532	-0.0620411	0.000663788	0.452892
3110056K07Rik	-0.115316	6.72293	3.04742	0.0808656	0.0256244	6.72293	0.150504	0.698054	0.0445459	0.0078385	0.0998414	0.717006
3110062M04Rik	-0.519659	2.95731	5.01374	0.025147	-0.0943843	2.95731	0.166687	0.683073	0.1804	-0.0262342	0.0339971	0.70279
3110082I17Rik	0.310706	4.86782	4.95365	0.0260357	0.31689	4.86782	5.15319	0.0232038	-0.10335	0.107247	0.0352454	0.0320909
3632451O06Rik	-1.52295	4.50242	105.335	1.03161e-24	0.186537	4.50242	1.56333	0.211179	0.476138	0.0511768	0	0.241308
4430402I18Rik	0.591784	3.40685	9.82433	0.00172218	-0.0712817	3.40685	0.141461	0.706833	-0.197764	-0.0176738	0.00279026	0.725265
4632415L05Rik	0.540979	3.95241	8.72596	0.0031371	0.104191	3.95241	0.327045	0.567404	-0.180291	0.0472265	0.00501072	0.593121
4632427E13Rik	0.0984077	5.30203	0.685063	0.407849	0.0175922	5.30203	0.0218961	0.882364	-0.0296049	0.00448128	0.437251	0.890146
4632428N05Rik	-0.0359477	9.19132	0.632778	0.426338	0.00884077	9.19132	0.0382718	0.844898	0.0158871	0.00155262	0.455576	0.855003
4833403I15Rik	-0.807948	4.54267	38.3459	5.92513e-10	-0.183211	4.54267	1.97063	0.160381	0.278242	-0.0676721	0	0.187682
4833420G17Rik	-1.23532	7.13124	261.184	9.47353e-59	0.023118	7.13124	0.0923721	0.761183	0.406488	0.00526871	0	0.776532
4833422C13Rik	-0.100047	3.79971	0.388357	0.533164	0.0534346	3.79971	0.111202	0.73878	0.0426655	0.0270729	0.559723	0.755159
4922501C03Rik	-0.414416	5.83353	14.7966	0.000119753	-0.11097	5.83353	1.06147	0.30288	0.145049	-0.0359575	0.000237906	0.334928
4930404I05Rik	-0.0476467	3.84138	0.100322	0.751444	-0.132434	3.84138	0.774978	0.378681	0.0236314	-0.0359667	0.767242	0.410547
4930412C18Rik	1.1791	2.91047	22.5126	2.08775e-06	0.0376856	2.91047	0.022973	0.879527	-0.385758	0.000564211	2.93712e-06	0.887529
4930417H01Rik	-0.463981	3.47115	5.45165	0.0195498	0.116304	3.47115	0.342236	0.558541	0.159354	0.0416023	0.0268834	0.584906
4930422G04Rik	-0.164542	4.63446	1.75353	0.185433	-0.0792915	4.63446	0.407103	0.523443	0.0617371	-0.0292115	0.213296	0.551135
4930423O20Rik	0.0801099	3.63437	0.256127	0.612793	0.188654	3.63437	1.42396	0.232753	-0.0149242	0.0758189	0.635433	0.263715
4930427A07Rik	-0.198559	3.56644	1.17212	0.278966	-0.132295	3.56644	0.519354	0.471118	0.0702588	-0.0474459	0.309728	0.50057
4930430F08Rik	0.149669	3.9001	0.500615	0.47923	-0.184046	3.9001	0.758619	0.383761	-0.0443842	-0.0636592	0.507302	0.41564
4930471I20Rik	-1.13647	3.93627	63.2031	1.86455e-15	0.0438594	3.93627	0.0908481	0.763102	0.369095	-2.97114e-05	0	0.778306
4930474H06Rik	-0.0941476	3.30405	0.260395	0.609849	-0.460181	3.30405	6.22498	0.012596	0.0259135	-0.156258	0.632646	0.0179105
4930486L24Rik	0.287024	3.93608	1.97914	0.159481	-0.0620868	3.93608	0.0920662	0.761567	-0.0975978	-0.0163785	0.185946	0.7769
4930503L19Rik	0.361594	4.14228	5.70714	0.016896	-0.102441	4.14228	0.456752	0.499146	-0.128197	-0.0306084	0.0235028	0.527506
4930506C21Rik	0.160541	7.65028	6.68663	0.00971387	0.0194554	7.65028	0.0981788	0.754026	-0.0525349	0.00502505	0.0141921	0.769736
4930506M07Rik	0.341778	5.66895	9.03132	0.00265392	0.0409789	5.66895	0.130215	0.718209	-0.10869	0.0160858	0.00425001	0.735906
4930518I15Rik	-0.560393	2.71447	5.79189	0.0161003	0.0833202	2.71447	0.129705	0.718738	0.187754	0.0315241	0.0224689	0.736385
4930523C07Rik	-0.554615	5.74071	24.0105	9.58104e-07	-0.0321068	5.74071	0.0806399	0.776432	0.192044	-0.0121351	0	0.790998
4930558J22Rik	0.37092	5.98271	23.4456	1.28495e-06	-0.0450824	5.98271	0.346784	0.555939	-0.123385	-0.0167817	2.93712e-06	0.582286
4930579G18Rik	0.307581	3.60586	2.34035	0.126061	0.423417	3.60586	4.44031	0.0350999	-0.0976627	0.148699	0.149755	0.0468264
4930581F22Rik	0.002022	5.01965	0.000271301	0.986858	-0.0727715	5.01965	0.358946	0.549092	0.00433129	-0.0247601	0.987582	0.575543
4930586N03Rik	-2.49284	3.0542	154.327	1.96417e-35	-0.0693357	3.0542	0.0892485	0.765135	0.70423	-0.0153918	0	0.780166
4931406P16Rik	0.0701236	8.94117	2.34494	0.125691	-0.0232171	8.94117	0.257048	0.612155	-0.0208653	-0.00938464	0.149385	0.636206
4931414P19Rik	0.474025	3.14271	4.79374	0.0285634	-0.0761148	3.14271	0.124542	0.72416	-0.13706	-0.0382369	0.0385115	0.74178
4931422A03Rik	-0.379198	3.98324	8.05067	0.00454869	-0.152836	3.98324	1.30663	0.253006	0.13246	-0.0557478	0.00694041	0.284821
4932438A13Rik	-0.220175	7.78745	7.87734	0.00500581	0.0472046	7.78745	0.362355	0.547201	0.0788004	0.0147426	0.00762182	0.573813
4932442E05Rik	0.188031	4.44662	1.6286	0.201897	-0.0463977	4.44662	0.0995223	0.752404	-0.0614673	-0.0228472	0.230458	0.76822
4932702P03Rik	-0.890019	3.55243	31.7764	1.72981e-08	0.209087	3.55243	1.73504	0.187769	0.297122	0.0604055	0	0.216601
4933406I18Rik	-0.368233	4.43095	4.03505	0.0445643	-0.234548	4.43095	1.63325	0.201255	0.130257	-0.077458	0.0583223	0.230678
4933421O10Rik	-0.0473047	3.48451	0.0530028	0.817918	0.13495	3.48451	0.429187	0.512388	0.0232447	0.0429159	0.829539	0.540424
4933427D14Rik	0.383058	4.5556	8.48324	0.00358433	-0.0563217	4.5556	0.183354	0.668507	-0.127515	-0.0191292	0.00559521	0.688945
5031439G07Rik	0.210021	8.46778	15.7349	7.28682e-05	0.0257814	8.46778	0.237199	0.626236	-0.0695035	0.00719267	0.000126296	0.649388
5033411D12Rik	0.277923	2.93688	1.33057	0.248705	0.271746	2.93688	1.27743	0.258377	-0.0818233	0.103423	0.278585	0.290337
5330426P16Rik	1.16319	3.2195	34.9663	3.35453e-09	-0.187118	3.2195	0.877494	0.348889	-0.380182	-0.0497371	0	0.381097
5330430P22Rik	0.488751	3.08186	5.89143	0.0152147	0.0293877	3.08186	0.0213062	0.883948	-0.162834	0.00780836	0.021203	0.891629
5330438D12Rik	-0.509492	3.45499	4.69269	0.0302912	0.163804	3.45499	0.490951	0.483504	0.174275	0.0550847	0.0406291	0.512565
5430405H02Rik	-1.06008	4.40824	55.8497	7.82302e-14	-0.0226475	4.40824	0.0257348	0.87255	0.356567	-0.013862	0	0.881085
5430416O09Rik	0.00189535	5.0444	0.000308446	0.985988	0.00982013	5.0444	0.00828897	0.927458	0.000901598	-0.000198615	0.986806	0.932391
5430417L22Rik	0.438703	5.45389	25.1051	5.42882e-07	0.037696	5.45389	0.186032	0.66624	-0.146625	0.0123929	0	0.686818
5730455P16Rik	-0.367893	3.86881	5.64232	0.017532	0.0455144	3.86881	0.0862434	0.769008	0.143151	0.0252871	0.0243311	0.783896
5730508B09Rik	-0.140073	6.35875	3.54939	0.0595675	0.0294736	6.35875	0.157156	0.691789	0.0499381	0.00632972	0.0757159	0.710997
5830417I10Rik	-2.03305	5.14523	223.539	1.52907e-50	0.14937	5.14523	1.20373	0.272578	0.60554	0.034664	0	0.30467
6330403K07Rik	7.68016	4.90399	917.56	1.4944e-201	-0.315334	4.90399	0.452914	0.500954	-0.992007	-0.0023963	0	0.529169
6330408A02Rik	-0.00309163	4.34179	0.000479096	0.982537	0.0867459	4.34179	0.371224	0.542338	0.00601943	0.032563	0.983617	0.569237
6330416G13Rik	-0.025054	5.53005	0.0607432	0.805325	-0.274832	5.53005	7.31671	0.00683162	0.0133198	-0.0935221	0.817846	0.0101066
6330549D23Rik	0.0112429	3.89008	0.00624194	0.937028	0.0103592	3.89008	0.0053105	0.941907	-0.0013826	0.00364656	0.940844	0.945981
6430550D23Rik	0.136348	5.25821	2.07997	0.149243	-0.0460393	5.25821	0.237123	0.626292	-0.0384152	-0.018111	0.174902	0.649449
6820431F20Rik	-0.0200957	3.3393	0.00683208	0.934125	-0.342516	3.3393	2.0298	0.15424	0.0041581	-0.125238	0.938138	0.181129
8430408G22Rik	0.0996291	6.89252	2.00341	0.156946	0.0169017	6.89252	0.0576009	0.810329	-0.035808	0.00231163	0.183156	0.822225
8430419L09Rik	0.404909	5.97941	18.8768	1.39442e-05	-0.00498172	5.97941	0.00287903	0.957209	-0.134482	-0.00191814	3.52454e-05	0.96017
9030025P20Rik	-2.37712	4.66661	107.998	2.69106e-25	0.109079	4.66661	0.241232	0.623317	0.652875	0.00305569	0	0.646683
9030617O03Rik	0.025844	7.16708	0.122947	0.72586	0.0603977	7.16708	0.670973	0.412713	-0.00798145	0.0206413	0.742779	0.443646
9130008F23Rik	1.37234	3.57695	46.2495	1.04114e-11	-0.0410771	3.57695	0.0438724	0.834091	-0.4289	-0.000964025	0	0.844765
9130208D14Rik	0.42796	3.84765	7.38951	0.00656055	0.184414	3.84765	1.36711	0.242309	-0.150855	0.055119	0.00981291	0.273819
9130401M01Rik	-0.22581	5.7233	6.2784	0.0122218	-0.0407424	5.7233	0.204508	0.651107	0.0818022	-0.0148056	0.0173378	0.672758
9230104L09Rik	-0.615418	2.89257	5.39713	0.0201699	-0.0914575	2.89257	0.118891	0.730241	0.203196	-0.0493572	0.0275942	0.747273
9230112E08Rik	0.0128717	4.33227	0.0101767	0.919646	0.0587148	4.33227	0.211921	0.645266	-0.00166825	0.0204026	0.924346	0.667289
9330133O14Rik	0.0781251	2.87071	0.114735	0.734817	0.235389	2.87071	1.04117	0.30755	-0.0325071	0.0840902	0.751558	0.339475
9330160F10Rik	-0.508749	4.72723	16.2602	5.52128e-05	-0.0491586	4.72723	0.152192	0.696449	0.176304	-0.0180725	9.9862e-05	0.715414
9330162012Rik	-0.472996	4.48207	10.0001	0.00156536	0.0777022	4.48207	0.268887	0.604079	0.166623	0.0268026	0.00257585	0.628373
9430008C03Rik	-0.229746	4.69972	3.85023	0.0497392	0.180581	4.69972	2.37673	0.123155	0.0843951	0.0569102	0.0643111	0.147725
9430015G10Rik	-0.444934	5.55819	26.3272	2.88194e-07	0.0144582	5.55819	0.0278056	0.867567	0.155272	0.00528711	0	0.876189
9430038I01Rik	0.468492	3.21441	4.38703	0.0362133	0.133059	3.21441	0.351895	0.553042	-0.147494	0.0419255	0.0479631	0.579467
9430069I07Rik	-0.210532	3.10864	1.24463	0.264581	-0.140868	3.10864	0.557955	0.455085	0.0774324	-0.0566288	0.294854	0.485303
9630028H03Rik	0.226589	3.49798	1.74686	0.186272	-0.299184	3.49798	3.04431	0.0810206	-0.0719315	-0.108634	0.214104	0.100831
9630033F20Rik	0.51513	5.53499	29.7813	4.83637e-08	-0.0703694	5.53499	0.555669	0.456011	-0.172159	-0.0285719	0	0.486166
9830147E19Rik	0.413413	3.8533	4.71037	0.0299812	0.261217	3.8533	1.87646	0.170737	-0.141834	0.0845214	0.0402062	0.198763
9930111J21Rik2	-0.0262821	2.8391	0.0120328	0.912652	0.375566	2.8391	2.31039	0.128512	0.00930603	0.117244	0.918107	0.153282
A130051J06Rik	-0.657704	3.27098	11.0212	0.000900747	-0.00391749	3.27098	0.000417325	0.983702	0.2302	-0.0134286	0.00157723	0.984842
A230056P14Rik	-0.288435	3.42479	3.01391	0.0825529	-0.221986	3.42479	1.78512	0.181522	0.108403	-0.0790363	0.101677	0.210209
A430005L14Rik	0.155111	4.37606	1.31553	0.251397	-0.117219	4.37606	0.751771	0.385916	-0.0464876	-0.0409898	0.281135	0.417737
A430092G05Rik	0.0469371	2.57466	0.0323088	0.857352	0.0620749	2.57466	0.0565694	0.812003	-0.00261362	0.0110937	0.86627	0.823791
A430105I19Rik	0.00744676	8.65138	0.0214311	0.883611	-0.00131634	8.65138	0.000669702	0.979354	0.000716526	-0.00213453	0.890757	0.980733
A530032D15Rik	-1.02233	5.54337	28.1378	1.12976e-07	0.207836	5.54337	1.18191	0.276968	0.322037	0.0572973	0	0.309079
A530040E14Rik	-0.420887	4.87484	2.24747	0.133833	0.253244	4.87484	0.821995	0.364597	0.126306	0.0818335	0.158052	0.396737
A530054K11Rik	-0.697892	5.17183	38.0092	7.04105e-10	-0.198712	5.17183	3.0811	0.0792068	0.236895	-0.0668434	0	0.0985726
A630001G21Rik	0.0956483	3.78426	0.237876	0.625745	0.0652321	3.78426	0.109326	0.740913	-0.0323842	0.00980445	0.647666	0.75725
A630007B06Rik	-0.298689	7.15199	27.2312	1.80521e-07	-0.0255192	7.15199	0.198826	0.65567	0.105626	-0.0112263	0	0.676832
A730049H05Rik	0.140728	4.21637	0.689943	0.406184	0.0425716	4.21637	0.0626555	0.802347	-0.0488551	0.00646286	0.43561	0.815006
A730071L15Rik	-0.0280289	3.53189	0.0308774	0.860514	-0.199636	3.53189	1.56965	0.210257	0.0131176	-0.0764027	0.869369	0.240377
A830010M20Rik	0.143716	4.13539	1.28618	0.256753	-0.0294366	4.13539	0.0539703	0.816293	-0.0423266	-0.0149578	0.286754	0.827814
A830073O21Rik	0.76758	3.85976	25.6397	4.1149e-07	-0.0903566	3.85976	0.35115	0.553463	-0.254501	-0.0284618	0	0.579913
A930015D03Rik	-1.85323	5.80592	277.892	2.16232e-62	-0.126648	5.80592	1.30354	0.253567	0.563678	-0.035269	0	0.285403
A930028C08Rik	0.080885	5.32455	0.742046	0.389006	0.00214559	5.32455	0.000522736	0.981759	-0.0225221	0.00022084	0.419047	0.982976
AA987161	0.172167	4.10999	1.20063	0.273196	-0.437872	4.10999	7.76917	0.00531455	-0.0517327	-0.14847	0.303607	0.00796252
Aacs	0.168014	7.63163	6.1967	0.0127989	0.0278662	7.63163	0.170565	0.67961	-0.0543989	0.00830894	0.0180838	0.699451
Aaed1	-0.194364	5.78757	4.00831	0.0452765	-0.0465436	5.78757	0.230036	0.631497	0.0705845	-0.0197862	0.0591476	0.654372
Aagab	0.229016	4.96094	4.72136	0.0297901	-0.0728171	4.96094	0.477096	0.489741	-0.078055	-0.0252663	0.0399888	0.51856
Aak1	-0.148016	5.83511	1.47552	0.224478	0.201582	5.83511	2.73416	0.0982232	0.0612661	0.0719254	0.253588	0.120154
Aamp	-0.316935	7.00124	23.0816	1.55267e-06	0.000107444	7.00124	2.21729e-06	0.998812	0.112821	-0.000969348	2.93712e-06	0.998884
Aar2	0.0317224	6.09183	0.18673	0.665652	-0.0112938	6.09183	0.0236702	0.877727	-0.00728939	-0.00505032	0.685555	0.885861
Aars2	0.190096	3.55496	1.14123	0.285392	0.118758	3.55496	0.446124	0.504182	-0.0477102	0.0439582	0.31609	0.532338
Aarsd1	-0.31738	5.36234	6.62175	0.0100741	-0.0498577	5.36234	0.163881	0.685608	0.110932	-0.0210818	0.0146415	0.705163
Aasdh	-0.0376365	4.65174	0.0594301	0.807399	-0.0676342	4.65174	0.191757	0.661458	0.0175993	-0.0259266	0.819699	0.682295
Aasdhppt	7.67568	3.74583	480.391	1.75683e-106	0.0528799	3.74583	0.000116215	0.991399	-0.995973	0.000113446	0	0.992032
Aass	-2.71108	5.43196	46.3004	1.01445e-11	-0.552201	5.43196	2.08181	0.149063	0.666546	-0.115273	0	0.175781
Aatf	-0.127338	5.93832	1.35401	0.244578	0.0939354	5.93832	0.737185	0.390564	0.0438028	0.0311505	0.274382	0.422178
Abca1	0.335265	3.35228	2.84255	0.0917986	0.348263	3.35228	3.05961	0.0802607	-0.120478	0.108041	0.112242	0.099859
Abca3	-0.624814	6.4167	70.7159	4.12548e-17	-0.0578363	6.4167	0.60594	0.43632	0.217792	-0.019528	0	0.46679
Abca4	-0.0257677	3.95428	0.0172624	0.89547	0.256049	3.95428	1.74365	0.186677	0.00497208	0.0933625	0.902024	0.215464
Abca5	1.31732	6.7646	317.425	5.27059e-71	0.0607186	6.7646	0.677867	0.410322	-0.422815	0.0169985	0	0.44136
Abca6	-0.373551	7.055	13.2317	0.000275257	0.0680941	7.055	0.440125	0.507062	0.129132	0.0199632	0.00051987	0.535228
Abca9	-0.392654	5.61573	15.8354	6.90962e-05	-0.103116	5.61573	1.09256	0.295905	0.133952	-0.041606	0.000120422	0.328161
Abcb10	0.291894	5.00959	6.54062	0.0105439	0.112253	5.00959	0.966699	0.325505	-0.0978554	0.0378928	0.0152407	0.357732
Abcb1a	-0.371124	6.21539	16.7669	4.22639e-05	-0.0281183	6.21539	0.0963975	0.756196	0.130621	-0.0101512	7.6365e-05	0.77193
Abcb1b	-0.938347	7.03098	188.49	6.79049e-43	-0.052943	7.03098	0.602367	0.437676	0.317193	-0.0174731	0	0.468121
Abcb4	-0.416292	5.22785	6.02294	0.0141211	-0.166928	5.22785	0.972185	0.324136	0.135614	-0.0647429	0.0197756	0.356307
Abcb6	0.0952625	5.97471	1.52501	0.216863	0.0317163	5.97471	0.16901	0.680993	-0.0292493	0.00951352	0.24579	0.700743
Abcb8	0.479376	6.99721	46.2125	1.061e-11	-0.0813017	6.99721	1.33019	0.248771	-0.160625	-0.0279379	0	0.280536
Abcc3	0.778263	6.97907	95.1493	1.76557e-22	-0.120276	6.97907	2.28343	0.130762	-0.258409	-0.0386607	0	0.155752
Abcc9	-0.0296208	8.44332	0.0462138	0.829788	-0.0580626	8.44332	0.177886	0.673196	0.0134102	-0.0217769	0.840409	0.693515
Abcd2	-0.0551267	10.2458	1.75119	0.185727	0.0175074	10.2458	0.176628	0.674287	0.0226227	0.00468583	0.21359	0.694422
Abcd3	0.0127399	8.99081	0.0637268	0.8007	0.0220617	8.99081	0.19111	0.661995	-0.000797349	0.00624854	0.813666	0.682844
Abcf1	-0.0953202	6.25077	1.04169	0.307428	-0.0975219	6.25077	1.09035	0.296394	0.0353154	-0.0347081	0.337933	0.328699
Abcf2	0.0121933	6.15525	0.0124926	0.911006	0.0417187	6.15525	0.145432	0.702939	-0.00213981	0.0108534	0.916565	0.721658
Abcg1	0.265236	8.66213	24.0644	9.31652e-07	-0.088733	8.66213	2.69553	0.10063	-0.0889595	-0.0326807	0	0.122818
Abcg2	2.22921	4.2353	198.539	4.35174e-45	-0.0518787	4.2353	0.100962	0.750678	-0.647213	-0.0105158	0	0.766438
Abhd10	1.4909	5.00733	165.262	8.01901e-38	0.102551	5.00733	0.770077	0.380193	-0.471487	0.0252943	0	0.412042
Abhd15	0.0847276	5.83381	0.883821	0.347157	0.0738646	5.83381	0.672154	0.412302	-0.0245607	0.0273052	0.377725	0.44322
Abhd16a	0.109722	9.55965	2.83706	0.0921127	0.0561165	9.55965	0.742193	0.388959	-0.0343019	0.0179032	0.112588	0.420695
Abhd17b	0.324341	6.71271	27.1304	1.9018e-07	0.0456927	6.71271	0.538151	0.4632	-0.107088	0.0155353	0	0.49303
Abhd17c	0.265861	5.05301	4.06565	0.0437638	-0.0023621	5.05301	0.000319898	0.98573	-0.0825679	0.00418062	0.0572826	0.986812
Abhd2	-0.132349	7.31981	3.87294	0.0490704	-0.0311395	7.31981	0.214429	0.643318	0.0493306	-0.0122026	0.0636385	0.665515
Abhd6	8.12457	4.50561	698.756	5.57413e-154	1.42458	4.50561	7.45494	0.00632625	-0.993695	0.0063047	0	0.00943108
Abi2	0.0263464	4.85653	0.0436268	0.83455	0.0463622	4.85653	0.134418	0.713894	-0.0098727	0.00622535	0.844938	0.731788
Abi3	-0.0413409	3.81963	0.0562581	0.812511	-0.161581	3.81963	0.86136	0.353358	0.0167686	-0.0556736	0.82456	0.385623
Abi3bp	-1.24727	6.92375	190.548	2.41426e-43	0.0170345	6.92375	0.0357722	0.849987	0.408493	0.00343637	0	0.85975
Abl2	0.492571	3.85598	5.55245	0.0184548	-0.00306683	3.85598	0.000250818	0.987364	-0.170181	-0.000459839	0.025503	0.988319
Ablim1	-0.0353633	10.0687	0.724245	0.394755	-0.0102497	10.0687	0.0608446	0.805166	0.015705	-0.00499953	0.424457	0.817582
Ablim3	0.00311865	7.81236	0.000768237	0.977888	-0.0551484	7.81236	0.238442	0.625333	0.00214069	-0.0200266	0.979117	0.6486
Abr	0.207122	5.92212	4.50625	0.0337711	-0.208185	5.92212	4.55432	0.0328358	-0.0673275	-0.0748881	0.0448292	0.0442036
Abracl	0.135698	6.68117	3.82081	0.0506199	0.0896025	6.68117	1.66631	0.196754	-0.0433386	0.0313539	0.065392	0.225988
Abt1	0.231526	4.6494	3.09729	0.0784226	-0.165625	4.6494	1.58425	0.208149	-0.0767294	-0.0565177	0.0970541	0.23805
Abtb1	-0.0384213	4.65404	0.0830034	0.773268	-0.128115	4.65404	0.922641	0.336783	0.0130724	-0.0390659	0.787702	0.368943
AC020971.1	0.238303	5.33102	4.39989	0.0359414	0.0676146	5.33102	0.355006	0.551293	-0.0747679	0.0273769	0.0476635	0.577716
AC025622.1	0.4142	4.26679	7.60666	0.0058153	-0.22187	4.26679	2.18416	0.139437	-0.132876	-0.0758488	0.00882897	0.165307
AC087901.1	-0.36509	3.12554	4.29075	0.0383202	-0.566009	3.12554	10.3315	0.00130777	0.123324	-0.203047	0.0505977	0.00212647
AC098726.1	0.113555	5.21262	0.995225	0.318469	0.0610463	5.21262	0.287559	0.591789	-0.0365814	0.0193652	0.348903	0.616665
AC099934.1	-0.0569996	4.35646	0.0153054	0.901541	-0.346254	4.35646	0.597252	0.439628	0.00404891	-0.0965813	0.907889	0.469971
AC100751.1	0.0362643	4.51362	0.0869265	0.768121	0.0217353	4.51362	0.0311758	0.859849	-0.0147696	0.00428158	0.782827	0.868881
AC108401.1	-0.104757	4.41842	0.590637	0.442173	0.0448855	4.41842	0.108408	0.741964	0.0339153	0.0141393	0.471287	0.758337
AC108401.2	0.26664	3.67144	1.57828	0.209009	0.285572	3.67144	1.81772	0.177585	-0.0802081	0.102548	0.237663	0.206065
AC117213.1	-0.307831	5.73294	11.476	0.000705013	-0.0618578	5.73294	0.463244	0.496112	0.109477	-0.0225385	0.00123359	0.524516
AC120176.1	-0.222306	4.78163	4.29185	0.0382956	-0.0863942	4.78163	0.648765	0.420555	0.0782806	-0.032137	0.0505654	0.451253
AC121121.1	0.858409	3.51703	24.5648	7.18513e-07	-0.0838233	3.51703	0.236275	0.626909	-0.29408	-0.0210031	0	0.65004
AC121292.1	8.07133	7.48741	3351.88	0	-0.292047	7.48741	1.66501	0.196929	-0.992869	-0.00179003	0	0.226214
AC121499.1	-0.233219	3.02158	1.26423	0.260853	0.190018	3.02158	0.8409	0.35914	0.0664171	0.0631287	0.290845	0.391368
AC122247.1	-0.730188	3.63371	15.1238	0.000100688	0.215037	3.63371	1.30975	0.25244	0.2447	0.0681665	0.000187975	0.284283
AC122371.1	0.161012	5.41483	2.66948	0.102289	-0.079831	5.41483	0.656424	0.417825	-0.0489181	-0.0263164	0.123832	0.448618
AC122487.1	1.40344	3.7447	53.0683	3.22153e-13	0.164651	3.7447	0.726679	0.393962	-0.444302	0.0473589	0	0.425509
AC122821.1	-0.788717	4.44655	34.7412	3.76579e-09	0.353249	4.44655	6.94223	0.00841839	0.267235	0.110442	0	0.0122184
AC124446.1	0.482413	4.20858	13.5305	0.000234717	-0.149057	4.20858	1.28737	0.256533	-0.159993	-0.0559648	0.000467001	0.28831
AC125486.1	-0.382953	4.60163	9.19882	0.00242172	0.0588162	4.60163	0.216229	0.641928	0.134768	0.0155476	0.00389168	0.664173
AC127595.1	-2.03301	4.71546	194.567	3.2022e-44	0.0448428	4.71546	0.0956008	0.757174	0.609107	0.00527806	0	0.772882
AC130214.1	0.889494	4.38598	43.9124	3.43407e-11	0.0210199	4.38598	0.0250602	0.874217	-0.307366	0.00685535	0	0.882662
AC131759.1	-0.23539	4.21384	2.46463	0.116435	0.0746258	4.21384	0.246129	0.619814	0.08527	0.0175223	0.139419	0.643208
AC132347.1	0.293249	4.3462	4.75815	0.0291599	-0.0130914	4.3462	0.00949781	0.922364	-0.0958375	-0.00551669	0.0393016	0.927632
AC133646.1	0.670515	3.81773	18.8382	1.4229e-05	0.145948	3.81773	0.887453	0.346168	-0.218943	0.0438108	3.52454e-05	0.37833
AC136008.1	-0.446068	5.71393	26.1851	3.10204e-07	0.0120986	5.71393	0.0189633	0.890472	0.156688	-0.00145754	0	0.897876
AC136215.1	1.0938	5.50093	98.5296	3.20207e-23	-0.144508	5.50093	1.71791	0.189963	-0.357033	-0.0452502	0	0.218792
AC137938.1	-0.0504756	3.72927	0.0851026	0.770498	-0.140294	3.72927	0.658342	0.417146	0.0181383	-0.0527877	0.785212	0.448045
AC138214.1	2.2525	2.84157	79.1764	5.68035e-19	0.0257231	2.84157	0.00998617	0.920399	-0.642497	0.00957383	0	0.925879
AC140312.1	-0.675726	4.53995	25.1625	5.26959e-07	0.0581819	4.53995	0.185975	0.666288	0.22794	0.0102949	0	0.686871
AC140333.2	0.377072	3.81373	4.81279	0.0282493	-0.106736	3.81373	0.382795	0.536111	-0.131856	-0.0359917	0.0381061	0.563351
AC140392.1	-0.00688948	6.38424	0.00778724	0.929682	0.0301179	6.38424	0.148861	0.699626	0.00583664	0.00890054	0.933924	0.718504
AC140461.1	0.159531	4.72488	1.4608	0.226802	-0.0153481	4.72488	0.0135548	0.907316	-0.0452247	-0.0142566	0.255879	0.91384
AC141882.1	0.498723	4.0092	10.899	0.000962169	-0.199535	4.0092	1.73848	0.187332	-0.169136	-0.0654317	0.00165947	0.216166
AC147987.1	-0.957769	3.26232	18.6728	1.55177e-05	-0.524178	3.26232	5.59287	0.0180337	0.292037	-0.142074	3.81825e-05	0.0254472
AC148328.2	0.229472	3.80022	2.03631	0.153582	-0.206381	3.80022	1.64635	0.199456	-0.0784996	-0.0729351	0.179566	0.228854
AC149055.1	0.258773	5.45624	7.182	0.00736386	0.100467	5.45624	1.08279	0.298074	-0.0850962	0.0355199	0.0109437	0.330252
AC153506.1	-1.024	4.79185	72.4333	1.72777e-17	-0.103162	4.79185	0.728426	0.393394	0.340292	-0.034342	0	0.425001
AC153516.1	-0.157773	3.59925	0.993173	0.318968	-0.0379071	3.59925	0.0574577	0.81056	0.0603614	-0.0106223	0.349399	0.82246
AC154200.1	-0.0288837	3.70706	0.0284698	0.866009	0.07893	3.70706	0.211858	0.645315	0.0142059	0.0303377	0.874547	0.66736
AC154486.1	-0.250858	3.36575	1.19715	0.273893	-0.344921	3.36575	2.26013	0.132743	0.0889709	-0.11549	0.304353	0.157776
AC154625.1	-0.0871354	5.07208	0.791304	0.373706	-0.0606612	5.07208	0.383481	0.535746	0.0363179	-0.0212392	0.404012	0.563039
AC154766.1	0.197949	3.1583	0.912785	0.339377	0.149323	3.1583	0.519038	0.471252	-0.0700001	0.0512947	0.369677	0.500714
AC154811.1	-0.423627	3.5534	5.5697	0.0182739	-0.348771	3.5534	3.77506	0.052022	0.141963	-0.112825	0.0253179	0.0669868
AC154910.1	0.0735619	3.19206	0.196954	0.657191	0.106649	3.19206	0.413897	0.519998	-0.019473	0.0403217	0.677549	0.547599
AC155921.1	-0.687214	3.60607	18.6377	1.5806e-05	-0.0192316	3.60607	0.0136551	0.906975	0.24205	-0.00713411	3.81825e-05	0.913534
AC157610.1	-2.35484	3.24754	56.6465	5.21647e-14	0.292993	3.24754	0.937235	0.33299	0.649956	0.0535645	0	0.36528
AC158662.1	0.126099	3.8219	0.645557	0.421706	-0.158818	3.8219	1.02339	0.311717	-0.0510116	-0.0604965	0.450953	0.343584
AC158993.1	0.136349	4.62245	1.05878	0.303492	-0.135002	4.62245	1.03824	0.308232	-0.0439879	-0.0492302	0.334182	0.340156
AC158998.1	-0.113929	3.13304	0.192574	0.660783	-0.0785881	3.13304	0.0923833	0.761169	0.0378464	-0.0254574	0.680865	0.776518
AC159323.1	0.0420485	4.61893	0.119803	0.729248	-0.00493242	4.61893	0.00163469	0.967749	-0.0130506	-0.00357079	0.746169	0.969689
AC161602.1	0.0646281	4.91103	0.329669	0.565854	0.236098	4.91103	4.39592	0.0360251	-0.022809	0.0846246	0.59088	0.0479837
AC161812.1	-0.655647	2.70951	9.9308	0.00162536	0.150818	2.70951	0.527908	0.467488	0.231133	0.0491391	0.00264634	0.497031
AC163296.1	0.460235	4.0308	11.954	0.000545302	-0.0670124	4.0308	0.253792	0.614417	-0.148672	-0.0242539	0.000948689	0.638456
AC164597.1	-0.035238	3.27016	0.0356416	0.850257	0.0430299	3.27016	0.0531713	0.817634	0.00329125	-0.0025968	0.85972	0.829039
AC165433.1	-0.622417	7.20192	96.547	8.71494e-23	-0.0298355	7.20192	0.222132	0.63742	0.213185	-0.0138105	0	0.659853
AC167018.1	-0.21149	4.59968	1.16779	0.279856	0.00679356	4.59968	0.00120333	0.972328	0.0752832	-0.000166448	0.310565	0.973992
AC169129.1	1.54079	3.26139	54.447	1.597e-13	0.105027	3.26139	0.263	0.608067	-0.485022	0.0219302	0	0.632226
AC170752.1	0.835894	4.78544	23.0412	1.58566e-06	-0.000119077	4.78544	1.08776e-07	0.999737	-0.271102	-0.00232737	2.93712e-06	0.999671
Acaa1a	1.09713	8.55261	368.661	3.66305e-82	-0.0589028	8.55261	1.07819	0.299102	-0.359033	-0.0192512	0	0.33128
Acaa1b	0.527541	8.42441	81.5926	1.67242e-19	-0.0183622	8.42441	0.0991227	0.752885	-0.176786	-0.00744596	0	0.768635
Acaa2	0.067023	10.0055	1.83287	0.175789	-0.0152556	10.0055	0.0949745	0.757946	-0.0201102	-0.00690398	0.203407	0.773657
Acaca	-0.171652	9.59601	10.4782	0.00120788	0.0336343	9.59601	0.402439	0.525832	0.0625866	0.00972283	0.00206773	0.553479
Acacb	-0.136867	8.58498	5.38996	0.0202529	-0.0436754	8.58498	0.548993	0.458729	0.0506627	-0.0168146	0.0277088	0.48878
Acad10	-0.781716	5.17886	33.7496	6.26816e-09	0.0726142	5.17886	0.292079	0.588891	0.25935	0.0261922	0	0.613907
Acad11	-0.13253	8.57405	4.85208	0.0276128	0.140199	8.57405	5.42969	0.0197972	0.0495933	0.0474346	0.0372045	0.0277734
Acad12	0.841594	4.55177	15.1709	9.82039e-05	0.263682	4.55177	1.49811	0.220962	-0.263063	0.0753446	0.000176227	0.251323
Acad8	0.117869	5.24903	1.14757	0.284058	0.141544	5.24903	1.65679	0.198037	-0.0349107	0.0517396	0.314721	0.227415
Acadl	0.291756	7.64975	18.1994	1.98944e-05	0.0162093	7.64975	0.0562451	0.812532	-0.0975426	0.00387506	3.81825e-05	0.824284
Acads	-0.0161946	8.39395	0.0869731	0.768061	0.000535937	8.39395	9.5297e-05	0.992211	0.00915272	-0.00115569	0.782744	0.992786
Acadvl	0.260304	4.51951	4.22816	0.0397585	0.134186	4.51951	1.12298	0.289278	-0.0897102	0.0426802	0.0523864	0.321467
Acap1	0.37939	4.28493	4.35408	0.0369204	-0.204882	4.28493	1.26922	0.259913	-0.120939	-0.0643707	0.0488413	0.291941
Acap2	0.0705039	6.03845	0.86772	0.351587	-0.144606	6.03845	3.65036	0.0560571	-0.0238609	-0.0534162	0.382089	0.0716803
Acap3	0.0826	6.56427	1.15788	0.281905	-0.0399011	6.56427	0.270137	0.60324	-0.0242212	-0.0145411	0.312574	0.627577
Acat2	0.669935	5.28164	21.4742	3.58622e-06	-0.0104814	5.28164	0.00535185	0.941682	-0.221526	-0.00755652	8.81135e-06	0.945751
Acat3	0.176293	3.126	0.656883	0.417662	-0.137609	3.126	0.401989	0.526064	-0.043722	-0.0490807	0.447064	0.55369
Acbd4	-0.12381	3.68224	0.565339	0.452117	-0.0679619	3.68224	0.171112	0.679125	0.0305448	-0.037715	0.48102	0.699016
Acer2	-0.251956	6.51232	10.4907	0.00119977	0.151436	6.51232	3.7904	0.0515475	0.089306	0.049943	0.00205011	0.0664111
Acin1	-0.0023071	6.94256	0.00135603	0.970625	0.0788693	6.94256	1.58725	0.20772	0.00472199	0.0259069	0.972171	0.23761
Acly	0.121161	9.75902	6.85219	0.00885327	-0.0212798	9.75902	0.211425	0.645653	-0.0380966	-0.00884276	0.0129967	0.667656
Acot11	0.230402	4.66303	2.60993	0.106197	0.113385	4.66303	0.629401	0.427575	-0.0863231	0.0251376	0.128358	0.458037
Acot13	-0.636848	5.83312	42.4725	7.16832e-11	-0.234977	5.83312	5.78844	0.0161319	0.21569	-0.0772627	0	0.0229007
Acot2	-0.224346	5.62292	5.73396	0.01664	-0.0311767	5.62292	0.110827	0.739205	0.0828709	-0.0090191	0.0232091	0.755576
Acot4	-0.22743	3.35865	0.896551	0.343708	0.406491	3.35865	2.87989	0.0896922	0.0757503	0.131763	0.374186	0.110474
Acox1	-0.0643253	9.60623	2.05534	0.151674	0.0177457	9.60623	0.156437	0.692459	0.0258704	0.00470615	0.177475	0.711634
Acp2	-0.254338	5.59275	3.38872	0.0656437	0.0780283	5.59275	0.319465	0.571929	0.0918362	0.0263653	0.0825447	0.597474
Acp6	0.42939	4.51512	6.38981	0.0114778	-0.0709548	4.51512	0.17469	0.675977	-0.139121	-0.0230951	0.0163685	0.695994
Acpl2	-0.486154	4.55468	12.5882	0.00038818	0.0703962	4.55468	0.264706	0.606905	0.170954	0.0257279	0.000696097	0.631075
Acpp	3.45411	3.46745	119.904	6.63921e-28	0.580438	3.46745	3.08669	0.0789352	-0.808123	0.0548715	0	0.0982847
Acrbp	0.0544507	6.08809	0.495264	0.481588	0.0723845	6.08809	0.875286	0.349496	-0.0152878	0.0246611	0.509478	0.381687
Acsf2	0.560628	6.22794	45.093	1.87898e-11	-0.0136735	6.22794	0.0267251	0.870142	-0.190644	-0.00467731	0	0.8787
Acsl1	-0.0574876	11.9459	2.48185	0.115166	-0.0134446	11.9459	0.135756	0.712538	0.023408	-0.00608444	0.138062	0.730461
Acsl3	-0.243684	5.18119	4.90757	0.0267393	-0.121115	5.18119	1.21039	0.271255	0.0886377	-0.0349523	0.0361735	0.303301
Acss2	-1.07087	8.4216	290.822	3.29146e-65	0.0903813	8.4216	2.10177	0.147129	0.355492	0.0253147	0	0.173581
Acss3	-0.829743	7.65719	168.739	1.39525e-38	0.0228387	7.65719	0.128758	0.719723	0.281791	0.00599839	0	0.737395
Actl6a	-0.196698	6.32588	8.73695	0.00311825	-0.0983909	6.32588	2.18512	0.139351	0.0722863	-0.0336207	0.00497548	0.165219
Actn1	-0.271296	7.80278	21.7468	3.11111e-06	0.0330551	7.80278	0.322977	0.569824	0.0970618	0.0101888	8.81135e-06	0.595527
Actr10	0.214956	6.02911	4.86343	0.0274318	0.00963479	6.02911	0.00978965	0.921184	-0.0722356	0.00413936	0.0369489	0.926651
Actr2	-0.1508	8.9135	8.89236	0.00286367	-0.0339034	8.9135	0.449608	0.502521	0.0555614	-0.0133752	0.00458484	0.53069
Actr3	0.0860643	7.74225	2.33668	0.126359	-0.0448752	7.74225	0.635357	0.425397	-0.025945	-0.0167362	0.15006	0.455932
Actr5	-0.30405	5.23088	7.80017	0.00522413	0.0727202	5.23088	0.445731	0.504369	0.106576	0.0231482	0.00793315	0.532529
Acvr1c	-0.0323501	4.85108	0.0678638	0.794473	-0.0534693	4.85108	0.186391	0.665938	0.0076334	-0.0267915	0.807871	0.686545
Acvrl1	0.0112305	7.85656	0.0365132	0.84846	-0.0161785	7.85656	0.0757878	0.783089	-0.000576263	-0.0071858	0.858158	0.797177
Acyp2	0.30602	6.79293	15.7393	7.2698e-05	0.0724794	6.79293	0.882235	0.34759	-0.104311	0.0214757	0.000126296	0.379731
Adal	0.677143	6.42272	85.6302	2.16937e-20	-0.0656592	6.42272	0.80536	0.369496	-0.225448	-0.0226656	0	0.401486
Adam12	0.00555629	7.24867	0.00764638	0.930319	-1.86963e-05	7.24867	7.75269e-08	0.999778	0.00334766	-2.60907e-05	0.934473	0.999692
Adam17	-9.46581	5.51225	68.7105	1.14031e-16	0.138634	5.51225	0.0133533	0.908004	0.985502	0.0109262	0	0.914492
Adam19	0.116361	6.74792	2.52837	0.111816	-0.0340134	6.74792	0.216049	0.642067	-0.0353111	-0.0120094	0.134479	0.664338
Adam22	-1.16093	5.73229	141.879	1.03369e-32	0.151464	5.73229	2.41511	0.12017	0.379745	0.0439554	0	0.144427
Adam23	0.450719	6.67544	34.1582	5.08099e-09	0.241167	6.67544	9.79162	0.00175309	-0.147415	0.0835269	0	0.00279907
Adam8	0.0323688	6.67546	0.169485	0.68057	-0.0489108	6.67546	0.387179	0.533786	-0.000234129	-0.0128317	0.699774	0.56121
Adamts10	0.19481	5.90254	4.10903	0.0426548	-0.0880784	5.90254	0.840113	0.359364	-0.0644287	-0.032654	0.0559638	0.39157
Adamts12	0.123988	3.90806	0.794449	0.372758	-0.316826	3.90806	5.18777	0.0227464	-0.0417821	-0.111288	0.403069	0.0315534
Adamts14	-0.40847	4.40841	8.74154	0.00311042	-0.176448	4.40841	1.63343	0.201229	0.136211	-0.0679566	0.00496666	0.230652
Adamts15	-0.426189	4.87384	10.9242	0.000949177	0.0652998	4.87384	0.256778	0.612342	0.150468	0.021484	0.00163304	0.636406
Adamts16	0.174483	4.31718	0.97472	0.323506	0.166657	4.31718	0.89242	0.344822	-0.0472676	0.0585678	0.353849	0.37697
Adamts2	-0.172884	8.6525	10.9652	0.000928373	-0.00570388	8.6525	0.0119406	0.912986	0.0632985	-0.00328388	0.0016066	0.919088
Adamts4	0.719338	3.89917	23.292	1.39177e-06	0.000845422	3.89917	7.34047e-07	0.999316	-0.24952	-0.00622312	2.93712e-06	0.999345
Adamts5	2.39902	4.12689	203.644	3.3477e-46	0.112658	4.12689	0.421029	0.516424	-0.680454	0.0236125	0	0.544207
Adamts6	0.192143	4.68492	2.09058	0.14821	-0.00173475	4.68492	0.000170639	0.989578	-0.0704657	-0.00360692	0.173757	0.990272
Adamts9	-0.108627	7.97728	3.47915	0.0621468	-0.029705	7.97728	0.260202	0.609981	0.0415229	-0.0119312	0.078747	0.634097
Adamtsl2	-0.143084	3.94625	0.480082	0.488385	-0.0504893	3.94625	0.060007	0.806485	0.0326853	-0.0122925	0.516128	0.818818
Adamtsl3	-0.63347	4.19202	17.1561	3.4431e-05	-0.0898167	4.19202	0.346072	0.556345	0.220314	-0.0356123	7.04908e-05	0.582768
Adap2	-0.101754	3.33074	0.244309	0.621111	0.139822	3.33074	0.458572	0.498292	0.0360991	0.034578	0.643179	0.526628
Adat1	-0.276212	3.23191	1.84604	0.174245	-0.139528	3.23191	0.475088	0.490656	0.0914859	-0.0571283	0.201718	0.519535
Adc	-0.131952	6.16731	2.15224	0.142362	0.0490651	6.16731	0.297558	0.585417	0.0491133	0.0160127	0.167383	0.610582
Adck1	0.0301391	4.88385	0.052868	0.818146	0.0411191	4.88385	0.0984536	0.753693	-0.00615225	0.0131719	0.829732	0.769416
Adcy3	-0.444888	6.68241	32.1377	1.43625e-08	0.0359032	6.68241	0.209542	0.647127	0.156295	0.0111624	0	0.669052
Adcy5	0.0541	8.74613	1.24502	0.264505	0.0280646	8.74613	0.335066	0.562691	-0.0152678	0.00854203	0.294781	0.588851
Adcy7	-0.310949	7.38552	21.4536	3.62487e-06	-0.00921968	7.38552	0.0187659	0.89104	0.112588	-0.00247915	8.81135e-06	0.898423
Adcy9	0.0888966	5.0447	0.611572	0.434197	0.276309	5.0447	5.90584	0.0150908	-0.0250945	0.0933882	0.463395	0.021438
Add1	-0.140109	7.62864	4.39013	0.0361476	0.0444384	7.62864	0.441698	0.506304	0.0517083	0.013735	0.0478838	0.534532
Adh1	0.705679	6.30684	44.0397	3.21782e-11	-0.28324	6.30684	7.11708	0.00763529	-0.230042	-0.0876504	0	0.0111992
Adh4	1.46927	3.17397	26.0935	3.25277e-07	-0.337805	3.17397	1.39528	0.237515	-0.4337	-0.101441	0	0.26872
Adh5	5.3128	8.90931	2273.51	0	0.0507352	8.90931	0.245874	0.619995	-0.949876	0.00129784	0	0.643372
Adhfe1	-0.550222	4.32727	13.1256	0.000291294	-0.157848	4.32727	1.08126	0.298415	0.193612	-0.0533474	0.000540429	0.330587
Adig	0.283145	8.76118	19.9616	7.9015e-06	-0.0137982	8.76118	0.0474354	0.827588	-0.0936555	-0.00638369	1.76227e-05	0.838702
Adipoq	0.318101	9.08667	47.82	4.67205e-12	0.0116603	9.08667	0.064334	0.799773	-0.106521	0.00219788	0	0.812603
Adipor1	0.366968	2.86598	2.80664	0.0938747	-0.230553	2.86598	1.10592	0.29297	-0.111648	-0.0735193	0.114603	0.3252
Adipor2	0.13862	9.38438	9.32232	0.00226379	0.0560501	9.38438	1.52451	0.216938	-0.0444528	0.0181422	0.00363028	0.247261
Adk	0.149563	7.3456	1.05147	0.305169	0.231182	7.3456	2.51029	0.113105	-0.0484055	0.0763653	0.335736	0.136494
Adm	0.55507	4.46749	13.8543	0.000197547	0.0575573	4.46749	0.148207	0.700255	-0.181073	0.0120842	0.000364202	0.719091
Adora1	0.137412	5.6309	2.47788	0.115458	-0.00617004	5.6309	0.00501693	0.943533	-0.0437089	-0.00484153	0.138415	0.947443
Adrb2	0.224063	4.09358	2.67764	0.101766	-0.102135	4.09358	0.554591	0.456448	-0.0790098	-0.0329379	0.123285	0.486577
Adrb3	-0.0177617	8.04096	0.00815095	0.928063	0.209846	8.04096	1.13834	0.286004	0.00922611	0.0672489	0.932405	0.318157
Adrbk2	-0.211953	6.02449	6.19563	0.0128066	-0.143435	6.02449	2.83744	0.0920906	0.0760097	-0.0514981	0.0180926	0.113111
Adss	-0.113425	6.2452	2.75427	0.0969953	-0.0914964	6.2452	1.79205	0.180676	0.0436372	-0.0324361	0.117955	0.209305
Aebp1	0.158958	7.93591	4.36208	0.0367475	0.0198408	7.93591	0.0680532	0.794193	-0.0516505	0.00634107	0.0486034	0.807545
Aebp2	-0.728388	7.54189	114.11	1.23252e-26	-0.0439468	7.54189	0.417539	0.518167	0.24928	-0.0153526	0	0.545843
Aen	0.284993	4.3339	3.94475	0.0470179	0.129804	4.3339	0.818779	0.365537	-0.0874254	0.0469	0.0611361	0.3976
Afap1	-0.118248	6.86958	2.77586	0.0956953	0.00633458	6.86958	0.00796317	0.928894	0.0437413	-0.00017014	0.11651	0.933841
Afap1l1	-0.218271	6.77804	11.4805	0.000703304	-0.0741939	6.77804	1.32655	0.249419	0.0781661	-0.027513	0.00123359	0.281173
Afap1l2	0.47233	4.1952	3.77641	0.0519801	-0.0909884	4.1952	0.141214	0.707077	-0.143187	-0.0176319	0.066887	0.725474
Aff1	-1.36217	3.03212	13.7165	0.000212583	-0.228968	3.03212	0.378077	0.538634	0.418922	-0.0674689	0.000402385	0.565794
Aff3	-0.518063	4.41521	13.6573	0.000219385	-0.148926	4.41521	1.12881	0.28803	0.178398	-0.0464485	0.000422945	0.32029
Aff4	0.0193438	7.76953	0.110209	0.739907	-0.0120195	7.76953	0.0425566	0.836562	-0.00365127	-0.00579494	0.756249	0.847105
Aftph	-0.0668806	6.58529	0.713358	0.398331	0.0261539	6.58529	0.109108	0.741161	0.0277552	0.00728388	0.427803	0.757506
Agap1	0.274041	4.901	5.94466	0.0147619	0.114502	4.901	1.03933	0.307978	-0.0967351	0.0452097	0.0206068	0.339889
Agap3	0.303097	6.53348	8.21217	0.00416103	-0.179806	6.53348	2.89034	0.0891122	-0.101911	-0.0616092	0.00646753	0.109833
Agfg1	-0.039782	6.6289	0.244382	0.621059	0.182909	6.6289	5.1645	0.0230531	0.0177864	0.0627071	0.643126	0.0318941
Agfg2	0.205842	7.47129	10.4974	0.00119545	0.0504894	7.47129	0.631691	0.426736	-0.067188	0.0151778	0.00204717	0.457259
Agmo	0.170928	6.71511	4.96079	0.0259284	0.0700633	6.71511	0.833698	0.361205	-0.0556392	0.0226996	0.0350897	0.393277
Agpat1	-0.406502	7.38225	51.2779	8.01713e-13	-0.0324666	7.38225	0.327416	0.567185	0.142937	-0.0124398	0	0.592898
Agpat4	0.548022	5.95228	23.1903	1.46737e-06	-0.0504934	5.95228	0.197338	0.656878	-0.177188	-0.0172598	2.93712e-06	0.67796
Agphd1	-0.266534	4.73493	4.59079	0.0321442	0.103555	4.73493	0.691817	0.405547	0.0916889	0.0319828	0.0428349	0.436614
Agps	0.0145109	7.30089	0.0574874	0.810512	0.016303	7.30089	0.072613	0.78757	-0.000844404	0.00428074	0.822522	0.801248
Agrn	0.189367	5.43256	3.13479	0.0766385	-0.0843039	5.43256	0.62077	0.430761	-0.061795	-0.0266817	0.0950187	0.461227
Agt	-0.329962	5.96782	11.7125	0.00062083	-0.204711	5.96782	4.50859	0.033725	0.11268	-0.062007	0.00107205	0.045258
Agtrap	0.780499	4.1778	31.2367	2.28412e-08	-0.128201	4.1778	0.840458	0.359266	-0.26054	-0.0386876	0	0.391474
Agxt2l2	0.0101034	4.90735	0.00876361	0.925416	-0.0605874	4.90735	0.314901	0.574688	0.000158298	-0.0219104	0.929868	0.600135
Ahcy	-7.90515	5.95265	21.0278	4.52669e-06	0.442752	5.95265	0.0965801	0.755973	0.792513	0.0243843	8.81135e-06	0.771719
Ahcyl1	0.101438	6.59191	1.80868	0.178667	-0.130569	6.59191	2.99767	0.0833844	-0.0298866	-0.0480178	0.206403	0.103466
Ahdc1	-0.258655	5.85843	9.68943	0.00185331	0.112489	5.85843	1.83208	0.175882	0.0917433	0.0376381	0.00300761	0.20415
Ahnak	-0.271681	8.33275	21.278	3.97258e-06	-0.00439616	8.33275	0.0055524	0.940601	0.0991516	-0.001091	8.81135e-06	0.944624
Ahnak2	0.3286	7.02224	21.8233	2.98953e-06	0.106962	7.02224	2.31452	0.128171	-0.109538	0.0369439	8.81135e-06	0.152983
Ahr	-0.0343239	4.41883	0.0468284	0.828677	0.0639837	4.41883	0.162472	0.686891	0.019377	0.0236924	0.839393	0.706421
AI413582	-0.659894	5.3214	34.3766	4.54156e-09	-0.0817964	5.3214	0.527673	0.467587	0.228816	-0.0277078	0	0.497136
AI464131	-0.187647	8.24995	13.2947	0.000266152	-0.0119707	8.24995	0.0541154	0.816051	0.067962	-0.00572686	0.000505184	0.827577
AI597479	-0.019337	4.76244	0.0213782	0.883753	-0.0727187	4.76244	0.300494	0.583573	0.0156804	-0.0244801	0.890904	0.608864
AI607873	0.301163	6.71825	5.12786	0.0235448	-0.0916693	6.71825	0.476416	0.49005	-0.0962679	-0.0325448	0.0319676	0.518921
AI987944	0.662238	2.85812	8.62458	0.00331658	0.184793	2.85812	0.656201	0.417904	-0.228233	0.055707	0.00528094	0.448686
Aif1	0.222291	7.62884	6.47767	0.0109238	0.100928	7.62884	1.33605	0.247732	-0.0726269	0.033424	0.0156901	0.279496
Aifm2	-0.145085	7.01382	5.88107	0.0153045	-0.0465401	7.01382	0.605174	0.436611	0.053652	-0.0180136	0.0213117	0.467034
Aimp1	0.307296	5.82094	10.4951	0.0011969	0.0493837	5.82094	0.270979	0.602676	-0.101879	0.01554	0.00205011	0.627024
Airn	0.0138332	4.74078	0.00123766	0.971936	5.62595	4.74078	542.353	5.80021e-120	0.000475031	0.960341	0.973443	0
Ajuba	0.883097	4.48991	42.5655	6.83534e-11	-0.070367	4.48991	0.266755	0.605517	-0.289013	-0.0250139	0	0.629738
AK157302	1.30742	4.90429	137.716	8.40655e-32	-0.0100594	4.90429	0.00794218	0.928987	-0.424047	-0.00942307	0	0.933915
Ak2	0.0640313	10.2909	2.11222	0.146128	0.0231284	10.2909	0.275588	0.599608	-0.0187538	0.00650872	0.171522	0.624187
Akap1	0.0876839	6.97674	1.56686	0.210664	0.028812	6.97674	0.169237	0.68079	-0.0257675	0.00947334	0.239243	0.700564
Akap10	3.19453	5.17201	579.433	4.98141e-128	-0.193364	5.17201	1.92977	0.164784	-0.798975	-0.0236468	0	0.192264
Akap11	-0.00548449	6.36291	0.00508911	0.943129	-0.0127634	6.36291	0.027676	0.867873	0.00255973	-0.00938506	0.946401	0.876488
Akap12	-0.616942	4.82551	31.4609	2.03501e-08	-0.0310573	4.82551	0.0795108	0.777961	0.210014	-0.0188864	0	0.79244
Akap13	0.0256848	8.18406	0.18392	0.668026	-0.00778213	8.18406	0.0168847	0.896613	-0.00553011	-0.00388766	0.687685	0.903745
Akap2	0.14943	7.83395	6.37528	0.0115721	-0.0183965	7.83395	0.0966631	0.755871	-0.0483738	-0.00809058	0.0165418	0.771616
Akap7	1.64138	5.38048	105.969	7.49107e-25	-0.225475	5.38048	2.03967	0.153243	-0.493493	-0.0540415	0	0.180075
Akap8	-0.00610285	4.27943	0.0019319	0.964942	0.104728	4.27943	0.579661	0.446445	-0.000973799	0.0286373	0.966931	0.476797
Akap8l	-0.0760241	4.4999	0.180298	0.671117	-0.204764	4.4999	1.3132	0.251816	0.0233708	-0.0753891	0.690733	0.283614
Akap9	0.170481	8.01327	8.27845	0.00401183	0.0640474	8.01327	1.16876	0.279656	-0.0553851	0.0207832	0.00630011	0.31164
Akirin1	0.0901555	6.71595	1.23236	0.266948	0.0240097	6.71595	0.0873556	0.767566	-0.028116	0.00659916	0.297283	0.782527
Akirin2	-0.134659	5.40712	1.79658	0.180127	-0.0713263	5.40712	0.503912	0.477786	0.0515034	-0.0266504	0.207904	0.50709
Akr1a1	-0.122652	8.09686	4.36966	0.0365843	0.0215188	8.09686	0.134532	0.713779	0.0460099	0.00627379	0.0483861	0.731671
Akr1c12	2.18063	3.3754	30.235	3.82739e-08	-0.49825	3.3754	1.60474	0.205232	-0.581656	-0.105028	0	0.23496
Akr1c13	-0.392676	6.67084	26.7008	2.37529e-07	0.0234341	6.67084	0.0952895	0.757557	0.137832	0.00545936	0	0.773284
Akr1c14	-1.51254	6.15914	51.6927	6.49027e-13	-0.492196	6.15914	5.62377	0.0177185	0.449835	-0.122144	0	0.0250272
Akr1e1	-0.939461	6.60995	110.528	7.50612e-26	-0.118836	6.60995	1.77975	0.18218	0.31435	-0.0384322	0	0.2109
Akt1	-0.0177207	7.07797	0.0546686	0.81513	-0.0234482	7.07797	0.0956973	0.757056	0.0091702	-0.00933668	0.827016	0.772761
Akt1s1	0.110969	6.49901	1.6272	0.202091	0.0665805	6.49901	0.585365	0.444217	-0.0362044	0.0204996	0.230684	0.474544
Akt2	-0.046265	7.54759	0.532793	0.465435	-0.0195115	7.54759	0.0947168	0.758264	0.019479	-0.00668706	0.494167	0.773995
Akt3	0.286882	5.95195	10.6993	0.00107175	-0.0216741	5.95195	0.0609492	0.805002	-0.0944504	-0.00931376	0.00184745	0.817435
Aktip	-0.365301	7.52625	37.1081	1.11759e-09	0.0095538	7.52625	0.0254131	0.873342	0.128547	0.00145845	0	0.881849
AL607123.1	0.0976171	5.47611	1.2779	0.258289	-0.0112825	5.47611	0.0170758	0.896033	-0.0335347	-0.00751433	0.288252	0.903246
AL645470.1	0.0268933	4.25848	0.0442778	0.833338	0.0996426	4.25848	0.608382	0.435398	-0.00458764	0.0358852	0.843798	0.46585
AL670236.1	-0.255675	3.44686	2.3637	0.124188	0.224622	3.44686	1.82307	0.176948	0.0979956	0.0811884	0.147731	0.205296
AL731663.2	0.144733	3.17649	0.213606	0.643956	0.301055	3.17649	0.918662	0.337827	-0.0307018	0.0788798	0.665069	0.369918
AL732403.1	0.780168	5.03353	43.0284	5.39521e-11	0.0623286	5.03353	0.274905	0.60006	-0.264967	0.0183115	0	0.624619
AL772190.1	0.318703	4.40615	3.93184	0.04738	-0.0189695	4.40615	0.0137002	0.906822	-0.109721	-0.006682	0.0616501	0.913387
AL805969.1	-0.0561765	6.72166	0.736669	0.39073	0.0556216	6.72166	0.72219	0.395427	0.0236143	0.0191121	0.420692	0.426833
Alad	-1.33205	5.6474	131.318	2.10917e-30	0.0227272	5.6474	0.0375419	0.846366	0.428827	0.00810526	0	0.856422
Alcam	1.22693	5.65272	132.906	9.47919e-31	0.182302	5.65272	2.93738	0.0865508	-0.394192	0.0542567	0	0.106888
Aldh1a1	-0.637188	9.42012	120.322	5.37797e-28	-0.087414	9.42012	2.27837	0.131189	0.22023	-0.0300591	0	0.156187
Aldh1a3	0.239215	5.53932	5.37501	0.0204273	-0.133044	5.53932	1.6635	0.197131	-0.0781808	-0.0512614	0.0279408	0.226396
Aldh1a7	-0.764731	7.65712	64.1371	1.16058e-15	0.430696	7.65712	20.4598	6.08975e-06	0.254522	0.135343	0	2.93712e-06
Aldh1l2	0.298845	3.31327	2.03319	0.153897	-0.151823	3.31327	0.526957	0.467889	-0.106177	-0.0425401	0.179875	0.497415
Aldh2	0.0933049	8.27045	2.72492	0.0987928	0.0276581	8.27045	0.239471	0.624589	-0.028829	0.00821985	0.119905	0.647878
Aldh4a1	0.362859	5.18028	7.06443	0.00786295	0.156307	5.18028	1.3122	0.251996	-0.11262	0.0505821	0.0116339	0.283799
Aldh5a1	-0.782085	6.18951	111.397	4.84346e-26	0.150034	6.18951	4.08896	0.0431642	0.265713	0.047573	0	0.0566159
Aldh9a1	-0.0130036	4.50761	0.0104638	0.918525	0.121327	4.50761	0.905997	0.341179	0.0157356	0.0481953	0.923382	0.373416
Alg1	-0.199598	7.10773	7.14258	0.00752747	0.0224321	7.10773	0.0902353	0.763878	0.0724396	0.00653388	0.0111757	0.779047
Alg2	0.130255	6.08283	2.56519	0.109239	-0.0494402	6.08283	0.369629	0.543207	-0.0413934	-0.0185821	0.131741	0.570068
Alg6	-0.309317	3.77122	2.99578	0.0834817	0.216712	3.77122	1.47283	0.224899	0.102302	0.0753601	0.102787	0.25552
Alg9	0.248196	6.74395	8.66343	0.00324659	-0.00473751	6.74395	0.00315826	0.955184	-0.0813474	-0.00336225	0.00518401	0.958322
Alkbh5	0.0539033	3.83577	0.0992347	0.75275	-0.125581	3.83577	0.536233	0.463998	-0.0168185	-0.0482309	0.768452	0.493864
Alkbh6	0.0568043	6.09835	0.667929	0.413774	-0.0458043	6.09835	0.434344	0.509865	-0.0166612	-0.018627	0.443005	0.537921
Alox15	0.580041	4.34241	10.804	0.00101279	-0.11229	4.34241	0.408738	0.522611	-0.190073	-0.0647183	0.00175052	0.550269
Alox5ap	0.127205	6.72647	3.04497	0.0809877	0.0706282	6.72647	0.939254	0.33247	-0.0382441	0.0261352	0.0999941	0.36474
Alpk1	1.25234	7.23335	337.007	2.86214e-75	-0.0579778	7.23335	0.728578	0.393344	-0.404921	-0.0189615	0	0.424945
Alpl	-0.421713	4.29934	3.24277	0.0717394	0.219093	4.29934	0.8747	0.349657	0.14506	0.06961	0.0896437	0.38184
Als2cl	-0.0738311	2.95084	0.0934849	0.759793	-0.0201866	2.95084	0.00660164	0.935243	0.0312613	0.00310261	0.774985	0.939666
Alyref	0.113574	6.06727	1.74297	0.186763	0.132297	6.06727	2.36534	0.124057	-0.0350587	0.0443588	0.214624	0.148733
Alyref2	-0.223986	2.97517	1.1301	0.287754	-0.0944857	2.97517	0.200828	0.654053	0.0826673	-0.0431895	0.318474	0.675319
Ambra1	-0.345441	4.80643	6.10387	0.0134887	-0.0442124	4.80643	0.100058	0.75176	0.118055	-0.0167345	0.0189473	0.767539
Amd1	-8.57191	3.61825	468.232	7.77023e-104	-0.0641302	3.61825	5.25431e-10	0.999982	1	0	0	0.99975
Amdhd2	0.237641	4.4333	2.5526	0.110113	-0.0223771	4.4333	0.0226669	0.880327	-0.075682	-0.00964487	0.132675	0.888231
Amigo2	0.265439	4.62848	2.90185	0.0884778	0.0993291	4.62848	0.405867	0.524075	-0.0893196	0.0239231	0.108512	0.551737
Ammecr1l	0.189779	4.53015	1.73359	0.187953	-0.0452545	4.53015	0.0989475	0.753096	-0.0604246	-0.0187168	0.21591	0.768817
Amotl2	0.173005	8.43369	11.4234	0.000725237	0.0321019	8.43369	0.393477	0.530477	-0.0565851	0.00944846	0.00126883	0.557858
Ampd3	-0.826461	6.28817	96.6785	8.15496e-23	0.0203049	6.28817	0.0587056	0.808554	0.279465	0.00485196	0	0.820627
Amz2	-0.298254	3.50262	3.34568	0.0673815	0.0875651	3.50262	0.289627	0.590459	0.106276	0.0284841	0.0845919	0.615435
Anapc11	0.120892	6.32543	2.6222	0.105378	0.0472118	6.32543	0.399851	0.527166	-0.0393639	0.0142848	0.127389	0.554768
Anapc13	4.70143	6.76259	1875.63	0	0.0203619	6.76259	0.0305109	0.861336	-0.924453	0.00102279	0	0.870291
Anapc16	-0.0422655	5.56775	0.17709	0.673886	0.0220524	5.56775	0.048219	0.826192	0.0156768	0.00620542	0.693427	0.837348
Anapc4	0.288004	3.74167	2.41641	0.12007	-0.0621597	3.74167	0.111907	0.737984	-0.0957785	-0.0168129	0.143378	0.754516
Anapc5	-0.105585	8.71537	3.78173	0.0518152	0.0467306	8.71537	0.740878	0.38938	0.0397586	0.0145863	0.0666931	0.421094
Angel2	0.461192	7.11972	45.1479	1.82699e-11	-0.0596754	7.11972	0.756942	0.384287	-0.154945	-0.0221957	0	0.416184
Angpt1	-0.895342	4.93968	47.6388	5.12441e-12	0.0167333	4.93968	0.0177485	0.894017	0.297653	0.00538769	0	0.901266
Angptl1	-1.06938	3.68807	14.6309	0.000130753	-0.0192165	3.68807	0.00468466	0.945432	0.329497	-0.0402118	0.000273152	0.949244
Angptl3	1.52966	6.34035	50.5398	1.16775e-12	0.123115	6.34035	0.336554	0.561825	-0.462398	0.0465522	0	0.587949
Angptl4	0.0775154	10.8707	3.57836	0.0585371	0.0149432	10.8707	0.132989	0.715353	-0.0233289	0.00369841	0.0745616	0.733145
Angptl7	0.18936	5.1651	0.997288	0.317968	-0.209115	5.1651	1.21466	0.270411	-0.0592774	-0.0690544	0.348401	0.302441
Ank	-0.694687	7.35435	112.402	2.91665e-26	0.00142345	7.35435	0.000470926	0.982687	0.238443	-0.00122443	0	0.983843
Ank2	-0.0337681	7.60082	0.254033	0.614249	-0.0856511	7.60082	1.63414	0.201132	0.014937	-0.0308724	0.636782	0.23054
Ankef1	-3.79509	4.07845	268.847	2.02411e-60	0.100841	4.07845	0.182372	0.669343	0.862386	0.0246731	0	0.689729
Ankhd1	-0.0240219	4.95544	0.0398017	0.841869	0.0759459	4.95544	0.39873	0.527746	0.00963394	0.0244177	0.851784	0.555244
Ankib1	0.0966637	6.20067	1.22091	0.269182	0.104918	6.20067	1.43819	0.230432	-0.0301549	0.0334747	0.29953	0.261265
Ankmy2	-0.00197168	5.59573	0.000464396	0.982807	0.179149	5.59573	3.78551	0.0516982	0.00565752	0.0615446	0.983863	0.0666079
Ankrd10	-0.112608	5.93191	2.10946	0.146391	0.0394119	5.93191	0.258361	0.611249	0.042424	0.0124589	0.171771	0.635269
Ankrd11	-0.0759354	6.94005	1.13755	0.286172	0.0171224	6.94005	0.0578121	0.809988	0.0297021	0.00400539	0.316906	0.821887
Ankrd12	-2.88799	3.22589	54.2744	1.74358e-13	0.284966	3.22589	0.503172	0.47811	0.723697	0.066617	0	0.507416
Ankrd13a	-0.316397	6.09975	14.937	0.000111164	0.0069638	6.09975	0.00727297	0.932037	0.113677	0.00247281	0.000223221	0.936702
Ankrd17	0.303328	8.19917	30.5635	3.23124e-08	0.000539634	8.19917	9.80403e-05	0.9921	-0.101121	-0.00117459	0	0.992713
Ankrd26	-0.210301	5.1901	4.34838	0.0370441	-0.0446863	5.1901	0.196572	0.657502	0.0775389	-0.0180329	0.0490028	0.678585
Ankrd40	-3.65519	9.73017	4238.63	0	0.0176487	9.73017	0.11053	0.739541	0.853644	0.00125811	0	0.755914
Ankrd42	0.0860271	5.17908	0.355285	0.551137	-0.00801781	5.17908	0.00310214	0.955583	-0.0266426	-0.00414477	0.57685	0.958637
Ankrd44	0.114111	6.45507	2.25295	0.13336	0.00804474	6.45507	0.0111985	0.915723	-0.0346186	0.00213378	0.157603	0.921702
Ankrd49	0.0126973	5.71764	0.0221809	0.881607	-0.0589184	5.71764	0.478244	0.489219	0.000454443	-0.0233125	0.888998	0.51804
Ankrd50	0.114491	6.57319	3.09365	0.0785983	-0.0831366	6.57319	1.63123	0.201533	-0.0358077	-0.0290458	0.0972861	0.230969
Ankrd52	-0.0624872	6.50776	0.687445	0.407035	-0.129023	6.50776	2.93018	0.0869376	0.0253879	-0.0453097	0.436435	0.107349
Anks1	0.439069	7.2806	57.0092	4.33783e-14	-0.0487241	7.2806	0.702469	0.401955	-0.147826	-0.0181701	0	0.433078
Anks3	0.179472	5.09705	2.17316	0.140438	0.340266	5.09705	7.81059	0.0051941	-0.0575321	0.115825	0.165289	0.00781273
Anks6	-0.159796	4.30351	1.01056	0.31477	0.215666	4.30351	1.83897	0.175072	0.0601968	0.0671861	0.345096	0.203337
Ano1	0.0781906	7.01055	1.31355	0.251752	0.0343766	7.01055	0.254048	0.614239	-0.0226171	0.0123402	0.281508	0.638227
Ano6	0.135755	8.04282	5.49103	0.0191143	-0.0248623	8.04282	0.184225	0.667767	-0.0437411	-0.0102398	0.0263195	0.688246
Anp32a	0.449541	4.11731	6.35408	0.0117112	0.15235	4.11731	0.730732	0.392646	-0.139301	0.0542716	0.016721	0.424234
Anp32e	0.257436	5.44051	9.40194	0.00216756	0.0144233	5.44051	0.0294885	0.863656	-0.0842673	0.00506945	0.00347461	0.872453
Antxr1	0.0360792	5.64395	0.141607	0.706688	0.000411701	5.64395	1.96241e-05	0.996465	-0.0145021	0.00159304	0.724948	0.996737
Antxr2	0.239704	7.65329	13.381	0.000254188	-0.0585019	7.65329	0.797404	0.371871	-0.0790364	-0.0210107	0.000484624	0.403745
Anxa1	0.664873	12.2113	183.358	8.95698e-42	-0.0306427	12.2113	0.392773	0.530845	-0.222419	-0.0111624	0	0.558231
Anxa2	-0.137323	5.31251	1.37788	0.240463	0.0687808	5.31251	0.346048	0.556359	0.0498561	0.0240551	0.269989	0.582788
Anxa4	0.0374368	8.12509	0.487726	0.484943	0.0199172	8.12509	0.138032	0.710245	-0.0101432	0.00510564	0.512821	0.728296
Anxa5	0.127648	11.4004	10.1829	0.00141748	0.0242065	11.4004	0.366285	0.545036	-0.040736	0.00696069	0.00236732	0.571733
Anxa6	0.165927	11.261	18.0107	2.19664e-05	0.00705289	11.261	0.0325558	0.856813	-0.0539212	0.000981251	4.11196e-05	0.866085
Anxa7	-0.0800331	6.83285	1.06881	0.301213	-0.0223813	6.83285	0.0835286	0.772571	0.0316819	-0.00859747	0.33178	0.787329
Aoah	-0.509918	4.81197	15.0974	0.000102106	0.0131168	4.81197	0.0101517	0.919745	0.174786	-0.000924551	0.00019385	0.925277
Aoc3	-0.697934	11.2316	325.185	1.07548e-72	-0.0166994	11.2316	0.187788	0.664764	0.240486	-0.00679622	0	0.685464
Aox1	-0.635582	8.53587	139.152	4.08043e-32	-0.0160833	8.53587	0.0895038	0.764809	0.220062	-0.00690877	0	0.779878
Aox3	0.800574	3.68962	7.36533	0.00664936	-0.111741	3.68962	0.14115	0.70714	-0.233527	-0.0461625	0.00992158	0.725535
Ap1ar	0.346375	6.00092	11.7099	0.000621696	0.082067	6.00092	0.658293	0.417163	-0.115006	0.0276302	0.00107792	0.448066
Ap1b1	-0.350463	4.47506	4.87516	0.0272459	-0.0053012	4.47506	0.0011447	0.97301	0.125935	-0.00729221	0.0367551	0.974579
Ap1g2	-0.149179	4.82817	1.03445	0.309115	-0.0308073	4.82817	0.0442086	0.833466	0.0512647	-0.0112753	0.339584	0.844157
Ap1m1	7.8041	3.83646	507.098	2.71455e-112	1.04032	3.83646	3.87417	0.0490345	-0.993897	0.00610296	0	0.0634329
Ap1s1	-0.0361825	6.94699	0.220043	0.639007	-0.0646715	6.94699	0.702884	0.401816	0.0168194	-0.0238143	0.660352	0.432928
Ap2a1	0.0292084	3.53402	0.0317795	0.858512	-0.0513806	3.53402	0.0984308	0.753721	-0.000468504	-0.0159014	0.867333	0.769445
Ap2b1	0.013104	7.81306	0.0574237	0.810615	-0.0379369	7.81306	0.481338	0.487817	-0.00107793	-0.0146546	0.822619	0.516724
Ap3b2	-0.764838	2.88194	8.03409	0.00459051	0.671436	2.88194	6.17717	0.0129409	0.24567	0.200178	0.00702558	0.0184069
Ap3m1	0.398198	6.8301	35.7039	2.29705e-09	-0.0760043	6.8301	1.30144	0.25395	-0.134892	-0.0277373	0	0.285793
Ap4b1	-0.254711	5.80835	7.30507	0.00687602	-0.173343	5.80835	3.38417	0.0658254	0.0900616	-0.0621583	0.0102241	0.0832996
Ap4e1	-0.538978	6.2628	42.3479	7.63967e-11	0.119229	6.2628	2.07329	0.149898	0.185216	0.0347362	0	0.176665
Ap4s1	-0.521724	5.42386	20.3673	6.39131e-06	-0.0935755	5.42386	0.654966	0.418343	0.180742	-0.0326359	1.76227e-05	0.449135
Ap5m1	-0.391555	5.17176	20.5456	5.82277e-06	-0.0165735	5.17176	0.0365974	0.848287	0.140202	-0.00372554	1.46856e-05	0.858231
Apba1	0.193179	3.95045	1.36705	0.24232	0.0377765	3.95045	0.052836	0.8182	-0.0490559	0.00996782	0.272042	0.829594
Apbb2	-0.00347203	3.55616	0.000452207	0.983034	-0.162843	3.55616	0.980607	0.322049	0.00839254	-0.0559773	0.984075	0.354187
Apbb3	0.0650556	5.33116	0.346038	0.556365	-0.140543	5.33116	1.61391	0.203943	-0.0208073	-0.0476799	0.581998	0.233606
Apcdd1	-0.756238	6.91039	136.538	1.52138e-31	-0.0574941	6.91039	0.79005	0.374085	0.25802	-0.0192353	0	0.406021
Aph1b	-0.693556	6.23662	75.1117	4.44827e-18	-0.073793	6.23662	0.850298	0.356468	0.237722	-0.0259336	0	0.388698
Aph1c	-0.118181	5.83604	2.04463	0.152745	0.173842	5.83604	4.42342	0.035449	0.0493959	0.0643109	0.178694	0.04727
Aplnr	0.114794	6.57784	2.31747	0.127928	-0.0637949	6.57784	0.716113	0.397422	-0.0402764	-0.0285334	0.151752	0.428707
Aplp2	0.0452546	10.6565	1.36231	0.243138	0.025795	10.6565	0.442623	0.505859	-0.0121685	0.00750244	0.272908	0.534112
Apobec1	-0.29955	8.32547	26.037	3.34932e-07	-0.00491682	8.32547	0.00697644	0.933434	0.106096	-0.0025259	0	0.938047
Apod	-0.0205754	5.54023	0.0527132	0.818408	-0.0117129	5.54023	0.017094	0.895978	0.0161932	-0.0112297	0.829973	0.903193
Apol10b	1.05592	3.99475	43.897	3.4612e-11	0.518402	3.99475	10.522	0.00117962	-0.337423	0.158675	0	0.00192969
Apol6	-0.00646794	9.57957	0.0203149	0.886661	0.0194625	9.57957	0.183911	0.668033	0.005859	0.00518528	0.89375	0.688466
Apold1	0.269198	7.02775	14.1321	0.000170412	0.0908529	7.02775	1.6097	0.204535	-0.0968591	0.032592	0.000323083	0.234285
Apom	0.175281	7.41378	3.51422	0.0608444	0.116512	7.41378	1.55304	0.212687	-0.0565305	0.0388164	0.0771492	0.242808
App	0.0935484	10.0738	0.413964	0.519965	-0.00363889	10.0738	0.000625174	0.980052	-0.0279909	-0.00285648	0.546891	0.981429
Appl2	0.101836	6.04886	1.13958	0.285742	-0.0426278	6.04886	0.199735	0.654935	-0.0302893	-0.0158544	0.316421	0.676165
Aprt	0.12073	5.72887	2.20946	0.137166	-0.103027	5.72887	1.60925	0.204597	-0.0375085	-0.0373275	0.161715	0.234347
Aqr	-0.650236	5.21923	44.8885	2.08577e-11	0.115546	5.21923	1.41218	0.234694	0.22743	0.0367708	0	0.265739
Arap1	-0.147226	5.75925	1.99595	0.15772	-0.0004445	5.75925	1.86343e-05	0.996556	0.0540032	-0.00262301	0.183999	0.996831
Arap2	-8.76181	3.79192	497.44	3.42673e-110	-0.108622	3.79192	1.3511e-09	0.999971	1	0	0	0.999747
Arap3	-0.141504	5.2594	1.88912	0.169301	0.0357211	5.2594	0.120061	0.728969	0.0553046	0.00677301	0.196434	0.746092
Arcn1	2.32551	8.17181	911.153	3.69299e-200	-0.105747	8.17181	1.99494	0.157825	-0.663898	-0.0203698	0	0.18498
Arf1	0.00149014	7.28259	0.000586911	0.980672	-0.00330981	7.28259	0.00289942	0.957058	0.00420597	-0.00173022	0.98174	0.960032
Arf5	-0.583401	6.62301	69.0955	9.38109e-17	-0.0682438	6.62301	0.945332	0.33091	0.202525	-0.024366	0	0.363174
Arf6	-0.912065	7.63133	4.31925	0.0376835	-0.751019	7.63133	2.92151	0.0874058	0.221073	-0.16335	0.0497489	0.107871
Arfgap1	-0.0357844	6.93281	0.264207	0.607245	-0.0366326	6.93281	0.276798	0.598808	0.0164962	-0.0141217	0.630032	0.623438
Arfgap3	0.0625282	6.52525	0.576876	0.447539	-0.212265	6.52525	6.6463	0.00993619	-0.0175189	-0.075578	0.476629	0.0143067
Arfgef1	0.0214696	7.35404	0.0929923	0.760407	0.0496759	7.35404	0.498111	0.480331	-0.00314998	0.0162915	0.775519	0.50949
Arfip1	-0.101993	4.16774	0.414545	0.519672	0.122967	4.16774	0.602436	0.43765	0.0364274	0.0396953	0.546586	0.468085
Arfip2	-0.218323	5.61974	6.21491	0.0126679	0.0993971	5.61974	1.28736	0.256535	0.0796142	0.0309788	0.0179135	0.288313
Arhgap1	0.172982	5.86196	4.18571	0.0407661	-0.0721973	5.86196	0.729286	0.393115	-0.0556736	-0.0254348	0.0536552	0.424731
Arhgap11a	0.712893	5.24609	33.4909	7.1598e-09	0.114156	5.24609	0.858422	0.354181	-0.236568	0.0361615	0	0.386372
Arhgap12	-0.0444842	6.8847	0.433736	0.510162	0.0385432	6.8847	0.325583	0.568272	0.0186393	0.011222	0.537436	0.593997
Arhgap15	0.268717	5.56635	8.27048	0.00402948	0.0735534	5.56635	0.618293	0.431682	-0.096015	0.0167905	0.00631774	0.462141
Arhgap19	0.792917	5.64327	60.0633	9.18552e-15	0.012742	5.64327	0.0150552	0.902345	-0.26167	0.00469763	0	0.909337
Arhgap25	0.252935	5.27611	2.86067	0.0907695	-0.115416	5.27611	0.597022	0.439717	-0.0847468	-0.0445874	0.111126	0.470077
Arhgap26	-0.380415	5.13556	9.95239	0.0016064	-0.0359806	5.13556	0.0891339	0.765281	0.133237	-0.0146118	0.00262284	0.780304
Arhgap28	0.113738	5.90653	1.95122	0.162455	0.00171312	5.90653	0.000451836	0.983041	-0.036561	0.00315963	0.189118	0.984184
Arhgap29	-0.178209	10.1009	17.473	2.91422e-05	0.000259078	10.1009	3.70605e-05	0.995143	0.0651526	-0.00153674	6.16794e-05	0.995453
Arhgap30	-0.0281699	7.17052	0.168615	0.681345	0.0952501	7.17052	1.92693	0.165095	0.014004	0.0332245	0.700485	0.192634
Arhgap32	-0.161104	5.84822	2.8758	0.08992	-0.133065	5.84822	1.9618	0.161321	0.0583863	-0.0474922	0.110145	0.18868
Arhgap39	0.12804	3.82854	0.5216	0.47016	-0.11446	3.82854	0.416684	0.518596	-0.0370252	-0.0361782	0.498634	0.546245
Arhgap44	-0.0551449	3.7665	0.0546545	0.815153	0.00911334	3.7665	0.00147256	0.96939	0.0243036	-6.74277e-05	0.827045	0.971213
Arhgap5	-0.194641	5.74081	4.01351	0.0451372	-0.0968227	5.74081	0.993319	0.318933	0.0664007	-0.0348376	0.0589949	0.351065
Arhgap9	0.300136	5.96756	8.14836	0.00431001	0.1194	5.96756	1.28905	0.256223	-0.100596	0.0396632	0.00665257	0.288025
Arhgdia	-0.110076	7.36155	3.82495	0.0504949	-0.0200651	7.36155	0.127085	0.721473	0.0420754	-0.00793542	0.0652069	0.739064
Arhgdib	0.354589	6.90979	18.7486	1.49134e-05	0.0648408	6.90979	0.627094	0.428423	-0.11821	0.0202289	3.81825e-05	0.45886
Arhgef1	0.0230509	4.37572	0.0161393	0.898908	-0.0189789	4.37572	0.0108307	0.917113	-0.00997612	-0.00418998	0.90531	0.922877
Arhgef12	0.116279	9.30483	5.88971	0.0152296	-0.00644946	9.30483	0.0181221	0.892914	-0.0366498	-0.00353154	0.0212177	0.900194
Arhgef15	-0.43352	6.36524	23.2141	1.44932e-06	0.122665	6.36524	1.86021	0.172601	0.150448	0.0374711	2.93712e-06	0.200676
Arhgef17	0.0210591	6.01381	0.0427899	0.836121	-0.052532	6.01381	0.266608	0.605616	-0.00351019	-0.0212517	0.846436	0.629826
Arhgef2	-0.00770809	7.40534	0.0149714	0.902616	0.0249291	7.40534	0.156608	0.692299	0.00614333	0.00706428	0.908826	0.711461
Arhgef28	-0.186942	6.68111	4.45334	0.034833	0.0507085	6.68111	0.327818	0.566947	0.0661579	0.016937	0.0462126	0.592672
Arhgef37	3.36263	7.73582	1539.47	0	0.0319364	7.73582	0.146715	0.701695	-0.819718	0.00305594	0	0.720472
Arhgef40	-1.40965	2.95314	42.2717	7.9433e-11	0.112473	2.95314	0.263838	0.607495	0.436849	0.0274718	0	0.631653
Arhgef7	0.314548	6.76967	15.2131	9.60364e-05	0.0160716	6.76967	0.0397461	0.841978	-0.104503	0.00393081	0.000164479	0.852298
Arid1a	0.13945	4.9281	1.20248	0.272827	-0.0216295	4.9281	0.0287946	0.865254	-0.04827	-0.0060767	0.303251	0.873945
Arid4a	-0.0495219	6.66657	0.469931	0.493019	-0.0517741	6.66657	0.51358	0.473593	0.0203939	-0.018532	0.520768	0.50289
Arid5b	0.115173	5.67641	1.76244	0.18432	0.111739	5.67641	1.6586	0.197793	-0.0368859	0.0359262	0.212145	0.227145
Arl1	0.0287178	7.68857	0.195037	0.658757	-0.0777965	7.68857	1.43135	0.231545	-0.00517169	-0.027092	0.678994	0.262425
Arl15	0.130046	5.50431	1.31894	0.250783	-0.0069479	5.50431	0.00374743	0.951187	-0.0404336	-0.0023945	0.28055	0.954607
Arl4c	-0.131702	4.56867	0.826937	0.36316	0.12528	4.56867	0.748413	0.386979	0.048842	0.0429641	0.393703	0.418824
Arl4d	-0.420174	4.13388	8.58565	0.00338822	0.0750101	4.13388	0.271692	0.602199	0.146663	0.0347713	0.00538373	0.626499
Arl5a	-0.295399	5.76323	6.95728	0.00834788	0.0864621	5.76323	0.597062	0.439701	0.114438	0.037223	0.0122566	0.470053
Arl6	0.0170026	5.71649	0.0242663	0.876209	0.0745112	5.71649	0.466252	0.494717	-0.00149028	0.0251926	0.884075	0.523268
Armc1	0.111731	7.19067	3.47792	0.0621929	-0.00967416	7.19067	0.026082	0.8717	-0.0362136	-0.00506958	0.0787911	0.880277
Armc10	0.762539	7.36935	125.009	5.06562e-29	-0.0122941	7.36935	0.0326073	0.856701	-0.254068	-0.00436414	0	0.866
Armc7	-0.21867	3.82228	1.17715	0.277938	0.0256643	3.82228	0.016288	0.898446	0.0696537	0.0101169	0.308612	0.905542
Armc8	-0.281444	5.14981	6.90117	0.00861392	-0.0742415	5.14981	0.479779	0.488523	0.103481	-0.0260848	0.0126413	0.517405
Armc9	0.00262411	4.26908	0.000246489	0.987474	0.0826784	4.26908	0.236125	0.627019	0.0024568	0.0286689	0.98816	0.650137
Arntl	-0.678656	5.37385	9.8646	0.0016849	0.160395	5.37385	0.559894	0.454303	0.237228	0.0533192	0.00274327	0.484554
Arntl2	-1.11778	4.18021	52.3231	4.70805e-13	-0.0348505	4.18021	0.0508294	0.821626	0.364266	-0.016476	0	0.832881
Arpc1b	8.57867	10.3306	2202.24	0	0.0397621	10.3306	0.0627275	0.802236	-0.994614	8.57778e-05	0	0.814912
Arpc2	0.0149189	6.31922	0.0461287	0.829942	0.022738	6.31922	0.107229	0.743321	-0.000979272	0.00674676	0.840538	0.759574
Arpc4	-0.0923564	7.90101	2.24209	0.134299	0.00957095	7.90101	0.0240795	0.876683	0.0350005	0.00219377	0.158595	0.884891
Arpc5	0.0274027	8.96721	0.353053	0.55239	0.0151842	8.96721	0.108419	0.741951	-0.00573239	0.00416599	0.578124	0.758322
Arpp19	1.87106	6.58658	580.524	2.88431e-128	0.0838397	6.58658	1.16121	0.281215	-0.566899	0.0200711	0	0.313246
Arrb1	0.0807861	7.78057	1.97493	0.159926	0.0200859	7.78057	0.122098	0.72677	-0.0245178	0.00550383	0.186389	0.744121
Arrb2	-0.0632418	7.65955	1.15079	0.283383	0.0013	7.65955	0.000487681	0.982381	0.0253799	-0.000895257	0.314036	0.983561
Arrdc3	0.220948	5.53884	5.91377	0.015023	0.0529678	5.53884	0.33932	0.560222	-0.0724118	0.0149131	0.020924	0.586533
Arrdc4	0.334122	5.03468	7.22857	0.00717524	-0.0446055	5.03468	0.128953	0.71952	-0.114779	-0.019785	0.0106705	0.737169
Arsb	0.576686	5.09377	20.882	4.88454e-06	-0.0604627	5.09377	0.228609	0.632557	-0.194508	-0.0192804	1.17485e-05	0.655371
Arsg	-0.195918	3.68626	1.03715	0.308486	0.00125877	3.68626	3.86389e-05	0.99504	0.0671633	0.00643207	0.338887	0.995359
Arsj	1.42993	3.86009	70.8584	3.83808e-17	-0.156425	3.86009	0.845166	0.357924	-0.450688	-0.040608	0	0.390152
Arsk	0.810254	6.16516	86.7073	1.25828e-20	0.0856134	6.16516	0.96953	0.324797	-0.269486	0.0268047	0	0.356965
Art2a-ps	-0.052796	5.7665	0.321637	0.570625	0.164583	5.7665	3.10849	0.0778851	0.0404606	0.0741949	0.595362	0.0970159
Art2b	-3.95115	3.95512	137.204	1.08829e-31	-0.70573	3.95512	4.06558	0.0437657	0.841808	-0.0725302	0	0.0573384
Art3	-0.0400088	7.48892	0.399398	0.527401	0.0375203	7.48892	0.351233	0.553416	0.0175146	0.0117775	0.554064	0.57986
Asap1	-0.131089	7.45398	3.65591	0.0558706	0.0750352	7.45398	1.19776	0.27377	0.049667	0.024298	0.0714219	0.305924
Asap2	-0.530658	4.42678	9.39425	0.00217668	0.050587	4.42678	0.0847251	0.770993	0.177721	0.0123443	0.00349811	0.78574
Asap3	0.412779	4.95541	10.8867	0.000968562	0.00208375	4.95541	0.000285059	0.986529	-0.135802	0.00387085	0.0016859	0.987649
Asb1	-0.046332	6.39082	0.295526	0.586701	0.0290326	6.39082	0.116094	0.73331	0.019143	0.00932555	0.610579	0.750204
Asb13	-0.410844	5.77248	13.9813	0.000184642	0.0121793	5.77248	0.012186	0.9121	0.142507	0.000213096	0.000343643	0.918284
Asb3	-0.456682	4.25439	6.70581	0.00960991	-0.0887269	4.25439	0.253381	0.614704	0.154278	-0.0352728	0.0140482	0.638726
Ascc1	0.414486	5.31079	17.6025	2.72233e-05	-0.0819413	5.31079	0.686311	0.407422	-0.141052	-0.0295171	5.87423e-05	0.438503
Ascc2	0.397986	5.71374	14.2705	0.000158327	-0.0969165	5.71374	0.846622	0.35751	-0.132755	-0.0347576	0.000314271	0.389782
Ascc3	0.0161809	6.01595	0.027301	0.868763	-0.0507697	6.01595	0.26806	0.604636	-0.00278656	-0.0142919	0.877229	0.628922
Ash1l	0.0341994	6.87482	0.23853	0.62527	-0.0452223	6.87482	0.417192	0.518341	-0.00760574	-0.0177167	0.647217	0.546007
Asns	-0.290302	6.45579	16.8571	4.03028e-05	-0.00613549	6.45579	0.00752166	0.930888	0.103484	-0.00157746	7.6365e-05	0.935645
Asnsd1	0.0725545	4.53056	0.211694	0.645443	-0.0697484	4.53056	0.19573	0.65819	-0.0266629	-0.0304543	0.666435	0.679202
Asph	-0.349108	9.74242	47.7738	4.78343e-12	0.00879326	9.74242	0.0303597	0.861676	0.123541	0.00166508	0	0.870608
Aspn	-0.130508	4.74059	0.861642	0.35328	0.153011	4.74059	1.18403	0.276538	0.069559	0.0714378	0.383784	0.308647
Asrgl1	0.674531	3.99033	17.218	3.3327e-05	0.00442564	3.99033	0.000755264	0.978075	-0.217251	0.00404032	7.04908e-05	0.979467
Asun	-0.0846062	6.44161	1.38173	0.239808	-0.0476482	6.44161	0.438223	0.507982	0.0318169	-0.018297	0.269301	0.536112
Atad2	0.138188	6.40341	3.36732	0.0665018	-0.103122	6.40341	1.87531	0.170868	-0.0440727	-0.0377845	0.083558	0.198852
Atad2b	1.05739	4.08724	3.979	0.046071	0.639313	4.08724	1.49594	0.221297	-0.266386	0.165799	0.0600582	0.251755
Atad3a	-7.92333	4.54216	69.2057	8.87092e-17	-0.254834	4.54216	0.147324	0.701105	0.971882	0.00797185	0	0.719914
Atad5	-0.0950531	4.4267	0.351308	0.553374	0.0445567	4.4267	0.0771366	0.781216	0.033307	0.0112335	0.579114	0.795456
Atat1	-0.505982	4.79617	8.28147	0.00400517	-0.342502	4.79617	3.79793	0.0513161	0.172169	-0.115146	0.0062913	0.0661585
Ate1	8.71967	3.75022	504.66	9.20405e-112	0.0651941	3.75022	4.75389e-10	0.999983	-1	0	0	0.99975
Atf1	0.0551758	5.2295	0.267917	0.604733	0.0432791	5.2295	0.164884	0.6847	-0.0168037	0.015365	0.627744	0.704297
Atf2	-0.0660179	4.2124	0.263922	0.607438	-0.140812	4.2124	1.20012	0.273297	0.0310614	-0.0533357	0.630238	0.30544
Atf4	0.0855229	7.00841	2.13081	0.144364	0.0314426	7.00841	0.28801	0.591498	-0.0256404	0.00952624	0.169595	0.616395
Atf5	0.187783	7.32658	7.76224	0.00533498	0.0637717	7.32658	0.895634	0.343955	-0.0608389	0.0213555	0.00805945	0.376065
Atf6	-0.171768	7.52288	8.74095	0.00311142	-0.0418959	7.52288	0.520022	0.470832	0.0632327	-0.0155394	0.00496666	0.500244
Atf6b	-0.151439	6.72879	4.30359	0.038032	-0.0227495	6.72879	0.0971616	0.755263	0.0554286	-0.00920375	0.0502687	0.77099
Atf7ip	0.0540276	7.60948	0.877596	0.348861	0.00666643	7.60948	0.0133543	0.908001	-0.0149778	0.000136188	0.379352	0.914486
Atg12	0.0855902	5.36653	0.978966	0.322454	-0.10439	5.36653	1.45622	0.227533	-0.0257171	-0.037415	0.352883	0.258199
Atg16l1	-0.0607246	5.4918	0.420825	0.516526	0.00706711	5.4918	0.00569028	0.939869	0.0264875	-0.000481551	0.543643	0.943901
Atg3	0.161078	6.39934	4.9827	0.0256021	0.0163657	6.39934	0.0514801	0.820508	-0.0527826	0.0048017	0.0346257	0.831818
Atg4a-ps	-2.39327	5.50315	397.327	2.10261e-88	-0.0297746	5.50315	0.0599299	0.806607	0.680776	-0.00646378	0	0.818924
Atg4b	-0.0180684	5.96123	0.0374275	0.846597	-0.0833494	5.96123	0.795822	0.372345	0.0116288	-0.0305246	0.856354	0.404274
Atg4c	0.364448	5.2312	13.3735	0.000255206	-0.1744	5.2312	3.06079	0.0802027	-0.120345	-0.0580304	0.000484624	0.0997973
Atg7	0.334866	6.28593	15.027	0.000105986	0.0339367	6.28593	0.154294	0.694465	-0.111671	0.00961143	0.000205598	0.713455
Atg9a	0.0428697	5.02144	0.0972068	0.755208	0.123359	5.02144	0.805614	0.36942	-0.00978334	0.0408365	0.770602	0.401427
Atic	-0.108522	7.5596	3.86798	0.0492157	0.0441271	7.5596	0.639511	0.423888	0.0411258	0.0134779	0.0637942	0.454525
Atl3	3.62544	5.3792	513.859	9.17608e-114	0.0165704	5.3792	0.0086855	0.925748	-0.846285	0.00185635	0	0.930693
Atm	0.18427	4.55339	1.25598	0.262414	-0.0352468	4.55339	0.0460828	0.830025	-0.0615904	-0.0138476	0.292446	0.841005
Atmin	-0.0533202	5.97899	0.352747	0.552562	0.0307537	5.97899	0.117258	0.732028	0.0234213	0.00878803	0.578262	0.748918
Atp10a	0.0724374	6.98393	0.966635	0.325521	-0.0108241	6.98393	0.0215867	0.883192	-0.0228105	-0.00523057	0.355926	0.890877
Atp10d	-2.23222	3.93088	104.561	1.52458e-24	-0.194112	3.93088	0.785687	0.375407	0.635305	-0.0332357	0	0.407243
Atp11a	0.206792	9.23655	19.6527	9.28715e-06	-0.00944996	9.23655	0.0410551	0.839432	-0.0679839	-0.00477534	2.05598e-05	0.849749
Atp11b	-7.56667	3.49973	402.78	1.36723e-89	0.513674	3.49973	2.08845	0.148416	0.995238	0.0047619	0	0.175082
Atp13a3	-0.0166819	8.3135	0.0967035	0.755822	-0.0438098	8.3135	0.666912	0.41413	0.00929407	-0.0165049	0.771228	0.445017
Atp1a1	-0.120031	7.40673	3.88002	0.0488638	-0.0644281	7.40673	1.11783	0.290387	0.0459325	-0.0233136	0.0633918	0.322613
Atp1a2	-0.339084	8.1325	36.9382	1.21932e-09	0.00686227	8.1325	0.0151393	0.902074	0.120428	0.00105429	0	0.90909
Atp1a3	-0.125813	4.8452	0.773528	0.379128	-0.008432	4.8452	0.00350576	0.952785	0.0425939	-0.00324236	0.409319	0.956172
Atp1b2	-0.0685569	3.36109	0.142824	0.705489	0.133026	3.36109	0.538117	0.463214	0.0153527	0.0304754	0.723814	0.493039
Atp1b3	0.135673	9.26222	8.56882	0.00341968	-0.0248497	9.26222	0.287546	0.591797	-0.0435029	-0.0100228	0.00541311	0.616668
Atp2b1	-1.05366	5.07503	53.1957	3.01924e-13	-0.0753609	5.07503	0.271124	0.602579	0.35045	-0.0156887	0	0.62693
Atp2b4	-0.123592	6.97641	2.97074	0.0847829	-0.00947715	6.97641	0.0174687	0.89485	0.0468523	-0.00362387	0.104297	0.902144
Atp2c1	-0.838444	3.04916	11.587	0.000664145	0.096566	3.04916	0.161069	0.688174	0.26884	0.0286646	0.0011396	0.70771
Atp5b	0.0138352	12.1858	0.151009	0.697573	0.0113784	12.1858	0.102139	0.749277	-0.00130189	0.00250026	0.716222	0.765095
Atp5e	0.589591	8.80367	113.833	1.41791e-26	-0.00566775	8.80367	0.0105697	0.918114	-0.197656	-0.00287987	0	0.923785
Atp5g1	-0.545682	6.55569	40.1193	2.38912e-10	0.0551214	6.55569	0.410195	0.52187	0.189274	0.0170918	0	0.549546
Atp5g3	-0.0356239	3.26428	0.0374881	0.846475	-0.0941402	3.26428	0.262554	0.608371	0.0282573	-0.0419045	0.856243	0.632578
Atp5j	1.88248	8.74006	998.514	3.77766e-219	0.0383797	8.74006	0.432431	0.510798	-0.569716	0.00866712	0	0.538808
Atp5s	-0.0555685	4.16931	0.235965	0.627136	0.0211454	4.16931	0.0342009	0.85328	0.0215936	0.00441312	0.648868	0.86286
Atp5sl	0.332085	4.9292	8.85219	0.00292737	-0.2114	4.9292	3.58518	0.0582971	-0.112187	-0.0748579	0.00465239	0.074497
Atp6v0a1	-0.000143949	7.21713	4.83272e-06	0.998246	-0.0282379	7.21713	0.190609	0.66241	0.00305238	-0.0114421	0.998311	0.683235
Atp6v0a4	-1.36689	4.1247	49.5334	1.95019e-12	0.118916	4.1247	0.367334	0.544461	0.437282	0.035706	0	0.571199
Atp6v0b	0.0107039	8.52395	0.0413559	0.838852	0.024666	8.52395	0.219639	0.639315	4.85562e-05	0.00724533	0.848956	0.661659
Atp6v0e	-0.0773005	9.38134	2.33398	0.126578	0.0248965	9.38134	0.242132	0.622671	0.0303181	0.00716565	0.150319	0.646101
Atp6v1b2	0.332188	8.67774	3.08246	0.0791407	-0.128096	8.67774	0.458783	0.498193	-0.10429	-0.0397635	0.0979793	0.526534
Atp6v1g1	0.0610414	6.94442	0.639853	0.423764	0.117352	6.94442	2.36505	0.12408	-0.0164408	0.0392734	0.453088	0.148747
Atp6v1g2	0.215441	7.55594	6.49049	0.0108453	0.0991542	7.55594	1.37548	0.240873	-0.0701882	0.0327555	0.0156108	0.272227
Atp6v1h	-0.0102638	6.36641	0.0202377	0.886875	0.0231665	6.36641	0.103048	0.748202	0.00762336	0.0071236	0.893947	0.764123
Atp8a1	-0.15965	6.8241	6.00796	0.0142414	-0.0452452	6.8241	0.482503	0.487291	0.0576326	-0.016399	0.0199401	0.516216
Atp8b1	-0.313203	6.69844	12.1542	0.000489763	0.103308	6.69844	1.32247	0.25015	0.111888	0.0331994	0.000872324	0.281922
Atp8b2	-0.39457	5.79223	8.67868	0.00321955	0.0954677	5.79223	0.508927	0.475604	0.136606	0.0306882	0.00513114	0.504914
Atp8b5	0.230391	3.66314	0.288406	0.591244	0.175065	3.66314	0.165337	0.684289	-0.0637641	0.0514433	0.614912	0.703921
Atp9b	-0.230565	5.95352	7.64206	0.00570227	-0.00185726	5.95352	0.000493263	0.982281	0.0822875	-0.00132838	0.00863218	0.983479
Atpaf1	-0.216735	4.8383	2.85327	0.0911883	-0.0437204	4.8383	0.116237	0.733152	0.0771818	-0.0179625	0.111569	0.750019
Atpaf2	-0.125617	4.25553	0.850738	0.356344	0.360238	4.25553	7.00539	0.00812645	0.0439962	0.123006	0.386821	0.0118748
Atpbd4	-0.0514414	2.66983	0.0480449	0.826501	0.649827	2.66983	7.40504	0.00650413	0.0112798	0.210432	0.837416	0.00964549
Atpif1	0.374287	7.12534	28.4339	9.69538e-08	0.0216322	7.12534	0.0951356	0.757747	-0.123984	0.00744235	0	0.773454
Atr	-0.429864	6.29114	26.9116	2.12981e-07	0.102447	6.29114	1.52956	0.216179	0.151137	0.0345513	0	0.246427
Atrnl1	-0.179313	9.4024	14.9215	0.000112079	-0.0255001	9.4024	0.301891	0.582699	0.0654385	-0.0103011	0.000223221	0.607977
Atxn2	0.0699379	3.46444	0.179464	0.671834	-0.117927	3.46444	0.509904	0.47518	-0.0241459	-0.043579	0.691462	0.504491
Atxn3	-0.0342169	4.31981	0.0661608	0.797011	0.00392535	4.31981	0.000852487	0.976707	0.0195392	-0.00869339	0.810174	0.978045
Atxn7	-0.240596	3.64534	1.54487	0.213895	-0.126747	3.64534	0.429538	0.512216	0.0768061	-0.0498356	0.242685	0.540274
Atxn7l3	0.0680651	5.93328	0.663546	0.415311	0.067888	5.93328	0.659976	0.416568	-0.0195626	0.0206672	0.444509	0.447523
AU021092	0.435326	4.79171	11.6236	0.000651199	0.202328	4.79171	2.51187	0.112992	-0.145669	0.0660294	0.0011161	0.136379
AU022252	-0.0463774	4.70324	0.184767	0.667308	0.172131	4.70324	2.5498	0.110308	0.0189575	0.0572557	0.687083	0.133439
Auh	0.0969977	7.39189	2.41516	0.120166	-0.00478553	7.39189	0.00587016	0.938928	-0.030557	-0.00286799	0.143493	0.943011
Aurkaip1	0.0281033	7.47973	0.264064	0.607342	0.0736827	7.47973	1.81519	0.177887	-0.00661298	0.024245	0.630147	0.206379
Aurkb	-0.155632	3.45501	0.509091	0.475532	0.186323	3.45501	0.727745	0.393615	0.0613526	0.0663252	0.50378	0.425174
AV039307	0.0591396	4.51052	0.221102	0.638201	-0.219949	4.51052	3.05765	0.0803576	-0.0183328	-0.0782716	0.659591	0.0999677
Aven	0.237676	4.80102	2.04049	0.15316	-0.0520139	4.80102	0.0976425	0.754677	-0.077644	-0.018551	0.179111	0.770388
AW146154	0.303755	3.0403	1.42456	0.232654	-0.0740627	3.0403	0.0863055	0.768928	-0.0984521	-0.0228033	0.262011	0.783811
AW554918	-0.467195	3.87528	5.87251	0.0153791	0.145229	3.87528	0.566147	0.451794	0.166782	0.0485069	0.0214057	0.482201
Axin1	0.336318	5.41499	15.6809	7.49795e-05	0.057979	5.41499	0.465569	0.495033	-0.111437	0.0193944	0.000129233	0.523529
Axin2	-0.0912169	5.64464	1.18157	0.277036	0.0623186	5.64464	0.551572	0.457676	0.0349149	0.0219245	0.307695	0.48774
AY036118	2.74228	9.78269	485.227	1.55722e-107	-0.182977	9.78269	2.42524	0.119395	-0.731337	-0.0263064	0	0.143581
Azi2	1.4372	3.62181	61.2494	5.02848e-15	0.0211346	3.62181	0.0123055	0.911672	-0.448571	0.00914922	0	0.917916
Azin1	-0.197894	4.71602	2.4617	0.116653	-0.0468876	4.71602	0.137719	0.710559	0.0709546	-0.020291	0.139678	0.728575
B230118H07Rik	-0.193306	7.14317	8.88171	0.00288042	-0.0579545	7.14317	0.798623	0.371505	0.0687977	-0.0225296	0.00460834	0.403389
B230120H23Rik	-0.107115	7.5436	2.51181	0.112996	-0.0132858	7.5436	0.0386374	0.844169	0.0404016	-0.00516633	0.135686	0.854301
B230206L02Rik	-1.59036	4.77175	94.4507	2.51273e-22	0.239523	4.77175	2.15206	0.142379	0.490849	0.0493131	0	0.168476
B230216N24Rik	0.00190509	5.34714	9.42061e-05	0.992256	-0.295922	5.34714	2.32984	0.126915	0.00150119	-0.101625	0.992745	0.15169
B2m	0.221022	13.9123	40.2346	2.25219e-10	0.0119238	13.9123	0.117208	0.732082	-0.0729761	0.00267875	0	0.748971
B3galnt1	0.239062	5.39998	7.0827	0.00778318	-0.000423701	5.39998	2.43748e-05	0.996061	-0.0823676	-0.00173453	0.0115252	0.996352
B3galt2	0.303536	8.21907	24.6006	7.05304e-07	0.0447621	8.21907	0.53577	0.464191	-0.100649	0.0146198	0	0.494029
B3galt4	-1.18397	4.01589	50.0889	1.46937e-12	-0.350872	4.01589	4.38476	0.0362617	0.382009	-0.103031	0	0.0482421
B3galt6	0.139121	5.19218	2.21784	0.136424	-0.045421	5.19218	0.236546	0.626712	-0.0452322	-0.0210524	0.160872	0.649819
B3galtl	-0.0950485	7.67211	2.27239	0.131697	0.0411065	7.67211	0.425096	0.514405	0.0361219	0.0124785	0.155882	0.542303
B3gnt1	0.0970032	5.90479	1.76714	0.183736	0.0868841	5.90479	1.41771	0.233781	-0.0302511	0.0286999	0.211566	0.264834
B3gnt2	-0.124639	4.19759	0.498269	0.480262	0.0234716	4.19759	0.0176928	0.894182	0.0419829	0.00727795	0.508338	0.901469
B430306N03Rik	-0.476293	2.98003	2.70717	0.099898	-0.558735	2.98003	3.73027	0.0534347	0.152634	-0.183999	0.121162	0.0686668
B4galnt1	-0.148865	3.88957	0.537146	0.463618	0.140072	3.88957	0.476872	0.489843	0.034528	0.0321688	0.492443	0.518671
B4galnt2	-6.71287	3.54738	221.383	4.51479e-50	0.588069	3.54738	1.48682	0.222711	0.97602	0.0168367	0	0.253147
B4galt1	0.0991691	4.37549	0.693699	0.404909	-0.0436343	4.37549	0.134309	0.714006	-0.0302113	-0.0156824	0.434376	0.731891
B4galt2	-0.0840377	3.56514	0.237321	0.626148	-0.185423	3.56514	1.15861	0.281754	0.030271	-0.0623794	0.648019	0.313802
B4galt6	-0.271999	6.20039	13.3399	0.000259816	-0.0615265	6.20039	0.682005	0.408897	0.0970761	-0.0202448	0.000490498	0.439968
B930094E09Rik	-0.0889721	2.86215	0.185822	0.666417	0.0427654	2.86215	0.0430621	0.835608	0.0411279	0.0281742	0.686237	0.846148
B930095G15Rik	0.0204026	3.41652	0.0147859	0.903218	0.12707	3.41652	0.56753	0.451242	-0.0140223	0.0375732	0.909396	0.481578
Bach2	-0.491566	3.14388	7.61599	0.0057853	-0.0629185	3.14388	0.124357	0.724356	0.166483	-0.0151391	0.00876729	0.741968
Bag3	0.0191447	4.76482	0.0220912	0.881845	-0.254532	4.76482	3.89951	0.0483001	-0.00272109	-0.0903939	0.889186	0.0625723
Bag5	0.0771981	5.7288	0.825412	0.363603	0.0316671	5.7288	0.138811	0.709466	-0.022999	0.00577639	0.394138	0.727629
Bag6	0.182436	9.69111	4.98173	0.0256163	0.0745975	9.69111	0.833329	0.361312	-0.0591167	0.0243755	0.0346433	0.393394
Bahd1	0.211692	5.41325	4.89768	0.0268928	-0.120027	5.41325	1.57406	0.209618	-0.0695497	-0.042561	0.0363233	0.239651
Baiap3	0.253508	3.73085	1.91297	0.166633	-0.235677	3.73085	1.64516	0.199619	-0.0887802	-0.061202	0.193582	0.229063
Bak1	1.02113	4.15732	53.7589	2.26667e-13	0.343453	4.15732	6.02643	0.0140932	-0.328723	0.109157	0	0.0200458
Banp	0.0997595	5.03919	0.739519	0.389815	-0.0998129	5.03919	0.740869	0.389383	-0.0301343	-0.0386708	0.419817	0.4211
Bard1	-0.188567	3.4568	0.807465	0.368871	-0.00999966	3.4568	0.0023297	0.961504	0.0545801	-0.0106551	0.399283	0.963985
Batf3	0.854911	3.47477	17.8895	2.34105e-05	-0.180315	3.47477	0.794208	0.372831	-0.287457	-0.0606189	4.69939e-05	0.404741
Baz1a	-0.102693	5.63068	1.29833	0.254519	-0.132157	5.63068	2.15056	0.142517	0.0371646	-0.0480679	0.284263	0.168623
Baz2a	0.0380907	7.62077	0.404009	0.525026	-0.0679234	7.62077	1.28477	0.257013	-0.00970317	-0.0254775	0.551852	0.288883
Bbc3	-0.134013	4.04318	0.805051	0.369587	-0.286894	4.04318	3.68531	0.0548938	0.0601832	-0.0888358	0.400018	0.0703204
Bbs10	-0.198414	4.42081	2.86759	0.0903804	-0.0535009	4.42081	0.208602	0.647866	0.0730935	-0.023395	0.110653	0.669645
Bbs7	0.141216	4.56695	1.30539	0.253231	-0.0438477	4.56695	0.125868	0.722755	-0.047356	-0.0149832	0.283012	0.740359
Bbx	-0.121474	5.59136	1.76463	0.184048	-0.0389753	5.59136	0.181746	0.669877	0.0443346	-0.0177898	0.211898	0.690208
BC003331	-0.0820204	8.81358	2.65673	0.103113	0.00337564	8.81358	0.00450172	0.946506	0.0318199	-0.000373797	0.124742	0.950266
BC003965	0.115444	5.65028	1.57316	0.209749	0.096763	5.65028	1.10519	0.29313	-0.0349222	0.0299516	0.238344	0.325356
BC004004	0.0367915	7.21333	0.346277	0.556228	-0.0396193	7.21333	0.40154	0.526295	-0.00926516	-0.0152838	0.58184	0.553955
BC005537	0.0412105	7.4396	0.446016	0.504233	-0.0218698	7.4396	0.125628	0.723009	-0.0116809	-0.00988511	0.53173	0.740647
BC005764	7.60771	3.23263	383.041	2.70957e-85	-0.438607	3.23263	1.34007	0.247021	-0.996599	-0.00340136	0	0.278773
BC016423	-0.220496	7.1024	14.0517	0.000177855	0.00808572	7.1024	0.0189148	0.890611	0.0778459	0.00135491	0.000331894	0.898029
BC018507	0.443653	7.06854	51.9049	5.8256e-13	0.00470634	7.06854	0.00587029	0.938928	-0.149637	1.25324e-06	0	0.943011
BC023719	0.329848	7.12502	0.468477	0.493689	-0.205072	7.12502	0.180622	0.670839	-0.083018	-0.055815	0.521494	0.691165
BC026585	0.746212	6.62494	92.9229	5.43713e-22	0.157828	6.62494	4.16719	0.0412142	-0.247592	0.0500816	0	0.054272
BC029722	0.727497	6.94223	111.958	3.65026e-26	0.000315613	6.94223	2.40571e-05	0.996087	-0.242652	-0.00227157	0	0.996402
BC033916	-3.03387	4.46762	178.884	8.49273e-41	-0.302053	4.46762	1.78981	0.180949	0.766446	-0.0478025	0	0.209587
BC034902	-8.9055	3.92382	532.883	6.66557e-118	-0.0395776	3.92382	2.55225e-10	0.999987	1	0	0	0.99975
BC039771	0.597203	5.02731	16.1118	5.97115e-05	-0.312306	5.02731	4.40433	0.0358479	-0.198703	-0.104405	0.000105736	0.0477722
BC046401	-0.0610284	3.46827	0.096255	0.756371	0.0676145	3.46827	0.117829	0.731401	0.0243671	0.0237684	0.771768	0.74833
BC048403	0.472734	4.63952	14.2882	0.000156848	-0.269684	4.63952	4.64295	0.0311814	-0.161881	-0.0916047	0.000314271	0.0422504
BC051226	-1.27858	4.75823	105.287	1.05674e-24	0.041552	4.75823	0.111365	0.738596	0.417752	0.011836	0	0.754977
BC053749	0.0326508	3.41991	0.0165878	0.897521	0.302326	3.41991	1.43522	0.230914	-0.00351865	0.110684	0.903965	0.261747
BC056474	0.273318	3.66542	2.55878	0.109683	0.222389	3.66542	1.69311	0.193192	-0.089289	0.0713166	0.132179	0.222122
BC064078	-0.106364	4.78334	0.918198	0.337949	0.131546	4.78334	1.40444	0.235982	0.0382867	0.0446021	0.368376	0.26714
BC067074	-0.113323	4.83746	0.757217	0.384201	0.0406194	4.83746	0.0967975	0.755707	0.0455819	0.00308057	0.414386	0.77146
BC068281	-0.686656	2.96048	6.03306	0.0140404	-0.160672	2.96048	0.329909	0.565713	0.231133	-0.0538075	0.0196581	0.591573
BC096441	-0.456974	6.51363	33.4267	7.40009e-09	-0.0652506	6.51363	0.68257	0.408703	0.159333	-0.0246297	0	0.439742
BC100451	-0.119291	7.07115	1.93466	0.164249	0.0796016	7.07115	0.861498	0.35332	0.0436216	0.0263053	0.191071	0.385596
Bcar1	-0.291489	6.00703	14.979	0.000108715	0.0850471	6.00703	1.27407	0.259004	0.103197	0.0280987	0.000214409	0.291036
Bcar3	0.0110285	8.99615	0.03941	0.842639	-0.045365	8.99615	0.666821	0.414162	-0.000306913	-0.0170996	0.85251	0.445067
Bcas3	-0.138519	4.6603	0.554162	0.456622	0.143916	4.6603	0.598053	0.439322	0.0515616	0.0489553	0.485461	0.469698
Bcat1	-0.469787	5.26116	10.2691	0.00135278	0.171346	5.26116	1.36875	0.242027	0.155414	0.0513683	0.0022792	0.273472
Bcdin3d	0.277546	3.50016	2.41203	0.120407	-0.00401902	3.50016	0.000475616	0.982601	-0.0932859	0.00589186	0.143713	0.983758
Bche	-0.828427	6.33705	97.4649	5.48183e-23	-0.00791356	6.33705	0.00881972	0.925178	0.283897	-0.00122905	0	0.930147
Bckdhb	-0.426761	7.50317	48.7303	2.93699e-12	-0.0282085	7.50317	0.213164	0.644299	0.1501	-0.0109899	0	0.666435
Bcl2	-0.213142	3.72929	1.8915	0.169033	0.0897556	3.72929	0.335674	0.562337	0.0793378	0.0322858	0.196167	0.58846
Bcl2a1b	0.320676	4.72811	2.24872	0.133725	-0.240412	4.72811	1.26809	0.260125	-0.0977939	-0.0793946	0.157946	0.292137
Bcl2l11	0.781396	3.10091	16.8762	3.98984e-05	-0.0118326	3.10091	0.00414538	0.948664	-0.261313	0.00861696	7.6365e-05	0.952295
Bcl2l13	0.0141749	7.27647	0.0462031	0.829807	0.0774274	7.27647	1.37819	0.240411	-0.00193335	0.0252472	0.840412	0.271716
Bcl2l2	0.00570047	5.70153	0.00460936	0.945871	0.0229685	5.70153	0.0747903	0.784486	0.00163335	0.0054138	0.949009	0.79847
Bcl6b	0.153692	6.08772	3.52003	0.0606313	-0.0515867	6.08772	0.396845	0.528723	-0.0494662	-0.0202676	0.0768614	0.556158
Bcl9l	0.23523	4.18358	1.48091	0.223632	-0.0471249	4.18358	0.0587855	0.808426	-0.0782954	-0.0103284	0.252742	0.820513
Bclaf1	-1.89139	5.61739	354.149	5.29266e-79	-0.0539825	5.61739	0.283668	0.594307	0.577901	-0.0127905	0	0.619059
Bcs1l	0.12196	3.90735	0.643291	0.422522	-0.228111	3.90735	2.24742	0.133838	-0.0465552	-0.0778261	0.451787	0.15908
Becn1	0.122405	8.25478	5.13881	0.0233967	0.0879324	8.25478	2.65219	0.103407	-0.038755	0.0291246	0.0317561	0.125958
Bend4	0.707595	4.40862	27.7592	1.3739e-07	-0.11209	4.40862	0.692097	0.405452	-0.246552	-0.0328657	0	0.436538
Bend7	0.212325	3.65572	1.464	0.226295	0.0949999	3.65572	0.290993	0.589585	-0.0711059	0.012635	0.255394	0.614586
Bet1	0.163268	4.42729	1.37473	0.241001	-0.19599	4.42729	1.98046	0.159342	-0.0535555	-0.0728228	0.27052	0.186589
Bhlhe41	-0.902071	5.57396	87.9791	6.61509e-21	0.0493435	5.57396	0.260532	0.609755	0.301496	0.0151376	0	0.633868
Bicc1	-0.0124672	6.45647	0.0288297	0.865173	0.0923906	6.45647	1.58622	0.207867	0.00617737	0.0315317	0.87373	0.237777
Bid	0.501589	5.71691	36.8138	1.29966e-09	-0.0279648	5.71691	0.114632	0.734931	-0.16804	-0.0112205	0	0.751778
Bin1	-0.13685	3.94825	1.05553	0.304237	0.148208	3.94825	1.23756	0.265942	0.0517378	0.0498144	0.334861	0.297991
Bin2	0.140185	4.28675	0.684647	0.407991	-0.212204	4.28675	1.57282	0.209799	-0.0442098	-0.0852476	0.437392	0.239851
Birc6	0.0320817	5.64525	0.0843183	0.771529	0.0543051	5.64525	0.241651	0.623016	-0.00738835	0.0169994	0.786049	0.646406
Blcap	0.758083	5.51314	54.7707	1.35442e-13	-0.658061	5.51314	41.2171	1.36227e-10	-0.242762	-0.207874	0	0
Blm	0.101325	3.09312	0.177349	0.673662	0.14165	3.09312	0.342876	0.558174	-0.041366	0.0374118	0.693224	0.584568
Blmh	0.102386	6.84651	2.30647	0.128836	0.0821665	6.84651	1.48544	0.222925	-0.0317183	0.0267558	0.152812	0.25337
Blnk	0.0255018	5.39202	0.0463023	0.829627	-0.0810448	5.39202	0.467212	0.494273	-0.00256194	-0.0253423	0.840256	0.522863
Bloc1s1	-0.0500762	3.76584	0.0718878	0.788608	-0.246867	3.76584	1.76406	0.184119	0.00636097	-0.0893922	0.802364	0.212841
Bloc1s5	-0.0240515	5.56049	0.0808616	0.776133	0.00831925	5.56049	0.00967015	0.921665	0.0126771	0.00127996	0.79051	0.92703
Bloc1s6	-0.392436	7.63803	35.8203	2.1638e-09	0.0144253	7.63803	0.0484863	0.825719	0.137745	0.0027024	0	0.836846
Blvra	0.120407	6.78437	2.59693	0.107071	0.0960137	6.78437	1.65075	0.198857	-0.0396959	0.0299213	0.129321	0.228229
Blzf1	-0.0199245	5.8493	0.0312848	0.859606	0.0662118	5.8493	0.345805	0.556497	0.00950208	0.0202829	0.868441	0.582918
Bmf	0.104046	5.86761	1.74615	0.186361	-0.0108689	5.86761	0.0190385	0.890256	-0.0312852	-0.00474476	0.214177	0.897653
Bmp8b	-0.14713	3.57741	0.621703	0.430415	-0.105324	3.57741	0.317109	0.57335	0.0515241	-0.0267836	0.459644	0.598802
Bmpr2	0.164198	5.97828	4.83907	0.0278218	0.029628	5.97828	0.157455	0.69151	-0.0571015	0.00441647	0.037507	0.710762
Bnc1	0.0028846	3.73882	0.000172792	0.989512	-0.104128	3.73882	0.254689	0.613793	-0.00044961	-0.0499757	0.990196	0.637792
Bnc2	0.139039	4.10785	0.953465	0.328839	-0.0471127	4.10785	0.108756	0.741565	-0.0523198	-0.00442953	0.359274	0.757908
Bnip1	0.0972672	5.60631	0.997118	0.318009	-0.0550804	5.60631	0.319782	0.571739	-0.0335567	-0.0218752	0.348448	0.597301
Bnip2	0.189423	7.03752	7.85638	0.00506418	-0.0336506	7.03752	0.247967	0.61851	-0.0618202	-0.0129887	0.00771287	0.642057
Bnip3	-0.116099	8.83763	5.85517	0.0155313	0.0267773	8.83763	0.311537	0.576738	0.0432768	0.00750227	0.021626	0.602338
Boc	-0.0235371	5.69253	0.0338457	0.854035	-0.11097	5.69253	0.752754	0.385606	0.0100967	-0.0401802	0.863257	0.417438
Bod1	0.290615	5.87028	14.1052	0.000172864	0.0774475	5.87028	1.00134	0.316987	-0.0960535	0.0245918	0.000323083	0.349088
Bok	-0.794878	3.94576	20.5822	5.71258e-06	0.276303	3.94576	2.47397	0.115746	0.267092	0.0851189	1.46856e-05	0.139613
Bola3	0.247499	4.51417	2.59984	0.106875	0.0227242	4.51417	0.0220923	0.881842	-0.0827335	0.00507647	0.129124	0.889638
Bop1	0.284929	4.80625	5.06333	0.0244373	0.28788	4.80625	5.16561	0.0230383	-0.094166	0.0936112	0.0330631	0.0318795
Bpnt1	0.674056	8.26917	144.503	2.75857e-33	0.0276399	8.26917	0.244248	0.621154	-0.225496	0.00784811	0	0.64455
Bptf	0.387844	4.74526	6.58839	0.0102646	0.18784	4.74526	1.54827	0.213391	-0.124571	0.0629034	0.0149294	0.243566
Brap	0.183272	5.28139	3.48148	0.0620592	-0.106807	5.28139	1.18196	0.276958	-0.0581136	-0.0346697	0.0786472	0.309067
Brd2	-0.16476	7.72545	7.79736	0.00523226	-0.0281532	7.72545	0.227721	0.633219	0.0601913	-0.011096	0.0079449	0.65592
Brd4	0.122338	5.22793	1.44955	0.2286	0.0735089	5.22793	0.523477	0.469362	-0.0363218	0.0209206	0.257744	0.498834
Brd7	0.0135954	3.32227	0.00519617	0.942535	0.169961	3.32227	0.804601	0.369721	-0.0131086	0.0545746	0.945863	0.401698
Brd8	-0.0805884	5.73055	0.98593	0.320739	-0.138219	5.73055	2.90004	0.0885773	0.0319222	-0.0492574	0.351244	0.109264
Brd9	0.194478	6.96796	7.42372	0.00643694	-0.0693145	6.96796	0.942986	0.331511	-0.0646233	-0.024794	0.00968367	0.363835
Bre	-0.0247363	5.65986	0.098845	0.75322	-0.0244173	5.65986	0.0963139	0.756299	0.0113387	-0.0111831	0.768908	0.772024
Brf1	0.338759	5.88537	9.3558	0.00222281	0.0246551	5.88537	0.0496885	0.823606	-0.112001	0.00671748	0.00356566	0.834784
Bri3bp	0.15288	3.62733	0.827661	0.36295	0.0745036	3.62733	0.197087	0.657082	-0.037641	0.0252654	0.393524	0.678165
Brox	-8.49325	3.54644	448.092	1.87675e-99	-0.0260968	3.54644	1.25232e-10	0.999991	1	0	0	0.99975
Brpf1	0.616216	3.42499	10.2564	0.0013621	-0.227197	3.42499	1.3967	0.237277	-0.204315	-0.0888047	0.00229389	0.268464
Brpf3	0.360534	5.15833	12.0912	0.000506609	0.0937626	5.15833	0.81795	0.36578	-0.118745	0.0333258	0.000907569	0.39785
Bsdc1	-0.137493	7.7006	5.49804	0.0190378	0.0268693	7.7006	0.209954	0.646803	0.0512133	0.00751678	0.0262079	0.668746
Btaf1	-9.12732	4.91259	1028.64	1.06863e-225	-0.736839	4.91259	2.3662	0.123989	0.998118	-0.00188236	0	0.148671
Btbd1	-8.10255	5.19524	292.653	1.31355e-65	0.943059	5.19524	3.51183	0.060932	0.989079	0.00945929	0	0.0775516
Btbd10	0.00959555	6.75274	0.0151254	0.902119	0.091751	6.75274	1.38355	0.239498	-0.000399871	0.0300814	0.908394	0.270767
Btbd19	-0.252998	4.60649	2.97487	0.0845672	0.062087	4.60649	0.178747	0.672452	0.0868813	0.0153232	0.104047	0.692825
Btbd6	-0.133927	3.23375	0.448918	0.502849	0.168924	3.23375	0.715462	0.397636	0.0491699	0.0508492	0.530311	0.42891
Btbd7	7.54825	6.98058	334.218	1.15928e-74	-0.319555	6.98058	0.768505	0.38068	-0.987206	-0.00256746	0	0.412503
Btc	0.120555	6.47633	3.08053	0.0792347	0.00566265	6.47633	0.00678	0.934376	-0.0366855	-0.000246322	0.0980909	0.938876
Btg2	0.279468	5.0082	7.71697	0.0054704	-0.0969118	5.0082	0.928002	0.335383	-0.0945979	-0.0403362	0.00825623	0.367648
Btla	0.24017	3.94063	1.59602	0.206469	0.320608	3.94063	2.84812	0.0914809	-0.0755228	0.107052	0.235184	0.112439
Btnl9	0.621205	7.82934	109.372	1.34488e-25	0.0352948	7.82934	0.354291	0.551694	-0.208167	0.00999982	0	0.578089
Bub1b	-0.887295	5.39722	49.36	2.13041e-12	0.0588261	5.39722	0.218293	0.640344	0.301289	0.0200264	0	0.662596
BX537302.1	-0.179481	4.53118	1.9966	0.157652	0.0204878	4.53118	0.0260249	0.87184	0.0671339	0.00414163	0.183916	0.880418
Bzw1	0.0375434	7.09479	0.388039	0.533332	-0.0190345	7.09479	0.09975	0.75213	-0.00934153	-0.00819367	0.559888	0.767938
Bzw2	0.245433	7.07477	11.2928	0.000778101	-0.0196174	7.07477	0.072203	0.788156	-0.0811512	-0.00865695	0.00134226	0.801833
C030006K11Rik	-0.0261527	5.402	0.0724691	0.787775	0.087109	5.402	0.803838	0.369948	0.0144037	0.0308718	0.801571	0.401906
C030034I22Rik	1.85872	4.74385	188.678	6.1801e-43	0.0910844	4.74385	0.447075	0.503727	-0.564048	0.0192714	0	0.531932
C130026I21Rik	-0.65478	5.3129	5.35284	0.0206886	0.558068	5.3129	3.93071	0.0474119	0.196535	0.169556	0.0283021	0.0616295
C130050O18Rik	0.219452	4.25862	2.1207	0.14532	0.199015	4.25862	1.74504	0.186502	-0.0637379	0.0603884	0.170688	0.215276
C130074G19Rik	0.167706	10.5565	14.6659	0.000128349	0.0187162	10.5565	0.182751	0.66902	-0.0545358	0.00501826	0.000267278	0.689423
C1galt1	0.152296	6.10614	4.13448	0.0420181	0.101865	6.10614	1.84904	0.173895	-0.0507064	0.0331837	0.0551972	0.202059
C1qbp	-0.211696	4.83372	1.79288	0.180575	-0.0497427	4.83372	0.0990214	0.753007	0.0702953	-0.0171909	0.208341	0.76874
C1qtnf5	-0.390011	5.18258	13.7231	0.000211832	-0.0107694	5.18258	0.0103905	0.918809	0.135785	-0.00814906	0.000396511	0.924413
C1ra	-0.0931973	8.02954	2.02371	0.15486	0.0221265	8.02954	0.11412	0.735502	0.035036	0.00657921	0.180868	0.752289
C1s	0.910452	10.0159	455.423	4.76396e-101	-0.00181883	10.0159	0.00183603	0.965822	-0.302332	-0.00196474	0	0.967944
C2	0.125174	7.90111	4.84582	0.0277133	0.0806964	7.90111	2.01399	0.155855	-0.0402235	0.0256876	0.0373777	0.182927
C230081A13Rik	-0.167666	3.63271	1.10979	0.292127	0.258486	3.63271	2.63678	0.104415	0.0597908	0.0936242	0.322827	0.127048
C2cd2l	-0.0655005	4.29888	0.177169	0.673817	0.163333	4.29888	1.10351	0.293497	0.0213246	0.0509024	0.693365	0.32575
C2cd5	0.0402339	5.94971	0.187825	0.664733	0.0955709	5.94971	1.05957	0.303314	-0.0107763	0.033619	0.68468	0.335342
C330018D20Rik	0.0936837	4.44932	0.666738	0.414191	-0.139676	4.44932	1.48167	0.223513	-0.0339435	-0.0519911	0.443378	0.254028
C3ar1	0.00409566	6.27889	0.00296685	0.956562	0.0579517	6.27889	0.592637	0.441401	-0.00205062	0.0189505	0.95906	0.47178
C4a	2.48829	8.02317	562.507	2.39532e-124	-0.00582864	8.02317	0.00337024	0.953706	-0.690862	-0.00155934	0	0.957051
C4b	0.260689	11.7835	41.5845	1.12885e-10	-0.0269743	11.7835	0.445815	0.504329	-0.0865113	-0.0106814	0	0.532485
C530005A16Rik	0.224716	4.89629	4.21023	0.0401808	0.0401223	4.89629	0.13436	0.713953	-0.0757966	0.0145895	0.0529298	0.731844
C77080	-0.923714	4.65633	44.9962	1.97419e-11	0.194034	4.65633	1.97618	0.159794	0.311755	0.0592409	0	0.18703
C920025E04Rik	0.333656	8.75083	0.848762	0.356903	-0.220649	8.75083	0.370255	0.542865	-0.093528	-0.0650351	0.387391	0.569783
CAAA01201205.1	1.13275	3.53978	26.5798	2.52874e-07	-0.185874	3.53978	0.710421	0.399304	-0.358715	-0.0450226	0	0.430505
Caap1	0.315864	3.41869	3.20639	0.0733513	-0.0649932	3.41869	0.136964	0.711318	-0.111621	-0.0282407	0.091453	0.729301
Cab39	-0.182148	7.0674	6.15602	0.0130966	0.0790215	7.0674	1.15881	0.281712	0.0663579	0.0257793	0.018448	0.31376
Cab39l	0.470621	7.05782	63.1215	1.94343e-15	0.0805806	7.05782	1.85057	0.173717	-0.158687	0.0257685	0	0.201833
Cables1	-0.283346	5.61776	8.70105	0.00318027	-0.0515346	5.61776	0.288229	0.591358	0.099906	-0.0204882	0.00508709	0.616266
Cacfd1	0.287876	6.27359	14.2254	0.000162167	-0.0747708	6.27359	0.959376	0.327344	-0.0955139	-0.0264573	0.000317209	0.359668
Cachd1	0.801657	5.81228	68.9109	1.03016e-16	-0.210939	5.81228	4.77068	0.0289484	-0.265302	-0.0672171	0	0.039375
Cacna1a	-1.33394	5.13884	116.715	3.31357e-27	-0.178065	5.13884	2.07859	0.149378	0.431336	-0.0531404	0	0.176142
Cacna1c	0.513023	4.11164	4.66076	0.0308595	-0.0526793	4.11164	0.0478383	0.826868	-0.166094	-0.0168372	0.041381	0.837986
Cacna1g	-0.244201	4.19121	1.80378	0.179256	0.144607	4.19121	0.632051	0.426604	0.0956413	0.0512698	0.206932	0.457153
Cacul1	4.26603	4.60767	607.766	3.42443e-134	0.191564	4.60767	0.89935	0.342956	-0.903433	0.0118592	0	0.375131
Cacybp	0.0256313	4.58219	0.0375196	0.846411	0.0942825	4.58219	0.507823	0.476083	-0.0140425	0.0269781	0.856199	0.505428
Cadm1	-0.128164	6.19117	2.31443	0.128178	0.0465794	6.19117	0.306196	0.580024	0.0492319	0.0180263	0.152019	0.605492
Cadm4	-0.192009	3.38114	0.890332	0.345387	-0.0356423	3.38114	0.0304797	0.861406	0.0747258	-0.00521713	0.375916	0.870347
Cage1	0.780638	3.16061	11.1321	0.000848474	-0.0669628	3.16061	0.0857171	0.769694	-0.246596	-0.0255279	0.0015038	0.78456
Calcrl	0.716955	4.06973	8.81566	0.00298657	0.124842	4.06973	0.26764	0.604919	-0.231304	0.0317315	0.00477281	0.629183
Cald1	-0.293374	7.35665	16.3172	5.35764e-05	-0.0667769	7.35665	0.846514	0.35754	0.104014	-0.0255937	9.39877e-05	0.389808
Calm1	0.146403	6.88494	4.61297	0.0317311	-0.102858	6.88494	2.27727	0.131283	-0.0473043	-0.0375039	0.0423708	0.156281
Calr	0.0167047	9.69967	0.115097	0.734414	-0.0246328	9.69967	0.250275	0.616881	-0.00232676	-0.0100673	0.751194	0.640609
Camk1	0.288913	5.09917	5.13	0.0235157	0.106425	5.09917	0.696045	0.404116	-0.0956403	0.0334502	0.0319235	0.435169
Camk2d	-0.0246087	8.69768	0.215945	0.642147	0.0421648	8.69768	0.633998	0.425893	0.0114613	0.0128121	0.66343	0.456431
Camk2g	-0.428827	4.71228	12.8044	0.000345811	-0.032883	4.71228	0.0752211	0.783881	0.153632	-0.0124652	0.000622669	0.797891
Camsap2	0.0115126	6.57904	0.0140883	0.905518	-0.00693634	6.57904	0.00512255	0.942943	-0.002005	-0.00540016	0.911519	0.946917
Camta2	-0.146143	6.71446	4.19431	0.0405598	-0.0359651	6.71446	0.254073	0.614222	0.0552809	-0.0145555	0.0534261	0.638209
Cant1	0.0181661	5.30759	0.0303923	0.861603	0.259128	5.30759	6.19524	0.0128094	-0.00442701	0.0878546	0.870417	0.0182219
Canx	0.204348	8.61915	15.605	7.80498e-05	-0.0207444	8.61915	0.160884	0.688344	-0.0671307	-0.00820358	0.00013217	0.707874
Capn2	0.0183589	9.86344	0.168433	0.681508	0.0259079	9.86344	0.335423	0.562483	-0.00281781	0.00749641	0.700631	0.588619
Capn3	0.0285935	4.81689	0.0444364	0.833044	0.106833	4.81689	0.621022	0.430668	-0.00312991	0.0324021	0.843469	0.461136
Capns1	-1.23521	10.2448	820.035	2.37768e-180	0.000576676	10.2448	0.000183892	0.98918	0.406429	-0.000938168	0	0.989923
Caprin1	-0.0901738	6.12693	1.08597	0.297366	0.00658937	6.12693	0.00579828	0.939303	0.0314343	-0.00259963	0.327926	0.943372
Capza1	8.2163	4.53635	779.163	1.83055e-171	0.31949	4.53635	0.312912	0.575899	-0.996767	0.000704281	0	0.60136
Car13	0.962696	6.81292	191.631	1.4004e-43	0.078284	6.81292	1.26899	0.259956	-0.318656	0.0218626	0	0.291988
Car2	0.546698	3.91396	9.04968	0.00262741	0.0324955	3.91396	0.0310532	0.860122	-0.179259	0.00377374	0.00422357	0.86916
Car3	0.180821	14.731	43.8466	3.55156e-11	-0.104018	14.731	14.5158	0.000138988	-0.0588527	-0.0372171	0	0.000226158
Carf	-1.14438	3.34628	28.6613	8.62085e-08	0.409985	3.34628	3.67604	0.0551997	0.364068	0.108843	0	0.0706729
Carkd	-0.500859	7.30476	50.9118	9.66123e-13	0.0578564	7.30476	0.680914	0.409272	0.174175	0.0186114	0	0.440309
Cars	-0.228611	6.72374	9.57346	0.0019741	-0.18266	6.72374	6.11184	0.0134279	0.0825072	-0.0643149	0.00318383	0.0190942
Cars2	0.218047	6.07857	5.83761	0.0156871	0.139709	6.07857	2.39648	0.121609	-0.0710669	0.044084	0.0218639	0.146051
Casc1	-0.347043	2.64009	1.70744	0.191317	0.632009	2.64009	5.64168	0.0175384	0.107322	0.20086	0.219467	0.0247599
Casc4	0.0988039	4.96972	0.822164	0.364548	0.0814665	4.96972	0.559164	0.454597	-0.0271326	0.0275392	0.394972	0.484874
Casc5	0.0330709	4.50524	0.0358066	0.849915	-0.144419	4.50524	0.678775	0.410009	-0.00867304	-0.0507295	0.859427	0.441058
Casd1	1.03635	5.48933	106.111	6.9727e-25	0.256869	5.48933	6.50582	0.0107522	-0.337576	0.0757725	0	0.015458
Casp3	0.188135	4.15386	1.44465	0.229388	0.197649	4.15386	1.59791	0.2062	-0.0548507	0.0682811	0.258587	0.235977
Casp7	0.257725	5.66257	7.81939	0.00516887	0.0613252	5.66257	0.442923	0.505715	-0.0874641	0.0203452	0.00785679	0.533977
Casp8	0.0754126	7.75875	1.33588	0.247761	0.0017434	7.75875	0.000713243	0.978694	-0.022441	-0.000863797	0.277657	0.980142
Casp8ap2	0.242895	4.71085	3.71611	0.0538898	0.0655462	4.71085	0.270806	0.602792	-0.0796252	0.0176905	0.0690722	0.627154
Casp9	-7.81702	5.1515	1096.2	2.21393e-240	-0.655159	5.1515	2.28879	0.130311	0.992482	-0.00360392	0	0.155256
Cast	1.18829	7.24866	43.6922	3.84309e-11	0.0298618	7.24866	0.0282285	0.866573	-0.371478	0.00233672	0	0.875225
Cat	-0.178905	11.0538	18.6336	1.58406e-05	0.0147051	11.0538	0.125969	0.722649	0.0652918	0.00358211	3.81825e-05	0.740247
Catsper2	0.317085	4.13363	2.75298	0.0970733	-0.0628452	4.13363	0.108572	0.741776	-0.0996198	-0.0263993	0.118043	0.758117
Catsperg1	-0.950605	3.44912	18.1746	2.01545e-05	-0.0241913	3.44912	0.014299	0.904817	0.308723	-0.0294253	3.81825e-05	0.911505
Cav2	-0.0102383	8.93925	0.0401181	0.84125	-0.00306142	8.93925	0.00358638	0.952246	0.00692321	-0.0024849	0.85122	0.955626
Cbfa2t2	-5.59388	6.14167	26.0469	3.33216e-07	0.259995	6.14167	0.0669658	0.795807	0.715398	0.00646306	0	0.809055
Cbfa2t3	-0.237951	4.76399	3.38059	0.0659683	0.0423278	4.76399	0.106937	0.743659	0.0860742	0.0133594	0.0829295	0.759888
Cbl	0.228024	5.72692	4.85529	0.0275615	-0.12974	5.72692	1.57152	0.209986	-0.0767279	-0.0465289	0.037134	0.240053
Cbll1	0.288794	3.72379	2.20328	0.137717	-0.138846	3.72379	0.510418	0.474958	-0.0907352	-0.0529229	0.162308	0.504227
Cbr1	2.00387	6.00446	446.837	3.5195e-99	0.138843	6.00446	2.12865	0.144568	-0.597196	0.0296627	0	0.170808
Cbwd1	0.213324	5.32582	3.94398	0.0470393	0.142011	5.32582	1.74824	0.186098	-0.0663287	0.0466559	0.0611537	0.214862
Cbx1	-0.324221	5.8376	12.9022	0.000328188	-0.0291219	5.8376	0.104159	0.746895	0.113746	-0.0134067	0.000593298	0.762939
Cc2d1a	-0.0735307	6.25456	0.815224	0.36658	0.060809	6.25456	0.557714	0.455183	0.0278468	0.0197419	0.396981	0.485423
Ccar1	-0.0837104	4.19155	0.429151	0.512406	0.0810025	4.19155	0.401692	0.526217	0.0303036	0.0235192	0.539648	0.553852
Ccdc111	-0.0421058	4.92357	0.0860871	0.769212	-0.0955697	4.92357	0.444624	0.504899	0.0139802	-0.0407054	0.78394	0.533128
Ccdc117	0.618544	5.09951	31.4165	2.08206e-08	0.189303	5.09951	2.93946	0.0864394	-0.204225	0.0597171	0	0.106773
Ccdc12	-0.908587	3.79811	27.6931	1.42167e-07	0.00608373	3.79811	0.00120549	0.972303	0.304754	-0.0111833	0	0.973974
Ccdc126	-0.16152	4.47206	0.995035	0.318515	0.0777004	4.47206	0.230383	0.63124	0.0617102	0.0270415	0.34895	0.654078
Ccdc127	-2.60091	6.81097	1186.98	4.11245e-260	-0.121336	6.81097	2.50851	0.113233	0.718746	-0.0202964	0	0.136623
Ccdc130	-0.26674	3.50756	1.51862	0.217829	0.105636	3.50756	0.237834	0.625775	0.101135	0.0296504	0.246785	0.648947
Ccdc134	0.0692067	5.54751	0.503295	0.478056	0.0442403	5.54751	0.205546	0.650281	-0.0199333	0.0122794	0.506136	0.67188
Ccdc141	0.610531	3.16609	5.57233	0.0182465	0.0347694	3.16609	0.0194423	0.889106	-0.193012	0.0103987	0.0252827	0.896505
Ccdc163	-1.0015	3.36716	29.8842	4.58631e-08	0.114081	3.36716	0.387063	0.533847	0.338	0.0345686	0	0.561298
Ccdc24	0.0387965	2.83218	0.0340208	0.853663	-0.105287	2.83218	0.252371	0.61541	-0.0124678	-0.0448872	0.862892	0.639354
Ccdc28a	0.644971	5.81633	43.5744	4.08142e-11	0.207558	5.81633	4.5173	0.0335538	-0.213186	0.0685212	0	0.0450407
Ccdc28b	0.252161	6.17819	9.74423	0.00179886	0.182682	6.17819	5.11475	0.0237232	-0.0840104	0.0631249	0.00292537	0.03279
Ccdc3	0.925985	6.4681	91.1029	1.36394e-21	0.0752541	6.4681	0.604898	0.436715	-0.306599	0.0199785	0	0.467148
Ccdc32	-0.0280351	5.41934	0.073226	0.786696	-0.0220663	5.41934	0.0453499	0.831362	0.0143973	-0.0108602	0.800517	0.842227
Ccdc34	-0.042562	4.89504	0.0784343	0.779431	0.0739624	4.89504	0.236612	0.626664	0.0171508	0.0216851	0.793765	0.649758
Ccdc41	-0.237878	6.55303	9.85146	0.00169697	-0.0145843	6.55303	0.0370447	0.847374	0.0855336	-0.00639071	0.0027462	0.857377
Ccdc43	-0.157263	4.3034	1.23424	0.266585	0.136748	4.3034	0.93356	0.33394	0.0539705	0.0437937	0.296913	0.366206
Ccdc47	-0.113938	4.15865	0.695962	0.404144	0.0756472	4.15865	0.306304	0.579957	0.0413159	0.0158647	0.433598	0.605428
Ccdc50	-0.0412793	9.48556	0.851675	0.356079	-0.00425461	9.48556	0.00904731	0.924222	0.0177591	-0.00292701	0.386569	0.929389
Ccdc55	0.49369	5.94457	30.7167	2.98582e-08	0.0842187	5.94457	0.894209	0.344339	-0.16483	0.0268792	0	0.376438
Ccdc58	0.13724	3.62733	0.496573	0.48101	-0.176073	3.62733	0.812625	0.367345	-0.0590275	-0.0567795	0.508955	0.399327
Ccdc80	-0.0194144	8.75737	0.150169	0.698374	-0.0202999	8.75737	0.164187	0.685331	0.0100171	-0.00867659	0.716985	0.704905
Ccdc84	0.0167729	4.28397	0.0139	0.906148	-0.0967044	4.28397	0.457254	0.49891	-0.00595463	-0.0329477	0.912192	0.527289
Ccdc85c	0.230487	3.89809	1.06585	0.301886	0.303479	3.89809	1.85265	0.173476	-0.0743998	0.108335	0.33252	0.201592
Ccdc88a	-0.0743795	7.80922	1.53661	0.215123	-0.0119632	7.80922	0.0397396	0.841991	0.0298909	-0.00539948	0.244033	0.852304
Ccdc88c	-0.932391	5.4323	66.7371	3.10237e-16	0.208892	5.4323	3.35649	0.0669406	0.309652	0.0602983	0	0.0846036
Ccdc9	-0.278864	5.4733	7.79291	0.00524516	-0.00352047	5.4733	0.00125623	0.971726	0.0986423	-0.00336092	0.00795959	0.97341
Ccdc90b	0.149329	4.5122	1.10577	0.293003	0.178711	4.5122	1.5853	0.207999	-0.0469853	0.0635538	0.323638	0.237921
Ccdc91	-0.251084	7.80054	18.007	2.20098e-05	0.0207138	7.80054	0.122614	0.726216	0.0896986	0.00567808	4.40567e-05	0.743637
Ccdc93	0.226707	7.63939	16.6806	4.42302e-05	0.0276495	7.63939	0.248226	0.618327	-0.0751654	0.00821239	8.22393e-05	0.641907
Cchcr1	0.956706	5.6599	26.2205	3.04569e-07	-0.217139	5.6599	1.3608	0.243399	-0.306258	-0.0714091	0	0.275002
Ccl6	-0.586837	5.61305	27.1189	1.91315e-07	-0.186523	5.61305	2.74385	0.0976292	0.195848	-0.0696578	0	0.119473
Ccl9	-0.216915	8.72212	14.815	0.000118588	-0.0122362	8.72212	0.0471682	0.828066	0.0768109	-0.00658932	0.000237906	0.839155
Ccm2l	-0.175863	5.18938	2.9278	0.0870662	-0.073079	5.18938	0.505316	0.477174	0.0661301	-0.0267829	0.106911	0.506482
Ccna2	0.0494255	5.83558	0.26345	0.60776	-0.00146632	5.83558	0.000233532	0.987807	-0.0127436	-0.000926336	0.630567	0.988666
Ccnd1	0.39795	7.10087	31.3731	2.12916e-08	0.00674268	7.10087	0.00900721	0.924389	-0.133857	0.000216091	0	0.929518
Ccnd2	-0.110144	8.90633	5.60705	0.0178884	0.0498246	8.90633	1.14749	0.284075	0.0416134	0.0157753	0.0248568	0.316125
Ccndbp1	0.305736	7.82174	13.0855	0.000297597	-0.011061	7.82174	0.0171548	0.895794	-0.101195	-0.00510481	0.000558052	0.903031
Ccng2	0.00121983	5.74384	0.000225703	0.988013	-0.0780909	5.74384	0.91084	0.339892	0.00351113	-0.028409	0.988707	0.372033
Ccnh	-0.0740194	5.03598	0.485881	0.485771	-0.0205496	5.03598	0.0373557	0.846743	0.0310901	-0.00731007	0.513652	0.856807
Ccni	-0.658492	8.35526	143.308	5.03307e-33	-0.00834843	8.35526	0.0231677	0.879022	0.227164	-0.0040961	0	0.887083
Ccnl2	-0.0278315	8.95078	0.337087	0.561516	-0.0031111	8.95078	0.00421293	0.948248	0.0131512	-0.00269375	0.586877	0.951911
Ccnt2	0.0132385	6.02295	0.0265251	0.870624	-0.0870439	6.02295	1.14765	0.284042	0.000266211	-0.0309681	0.878891	0.316101
Ccnyl1	-2.67806	5.27543	408.797	6.69744e-91	-0.064687	5.27543	0.230592	0.631085	0.733002	-0.00994821	0	0.653917
Ccr2	0.69003	9.36624	178.975	8.11492e-41	0.0507746	9.36624	0.975677	0.323268	-0.230977	0.015532	0	0.355467
Ccr5	0.0607458	7.85831	0.997531	0.317909	-0.0181082	7.85831	0.0886285	0.765928	-0.0157166	-0.00586275	0.348327	0.780935
Ccr9	-0.81206	3.01244	11.3551	0.000752403	-0.136961	3.01244	0.322605	0.570046	0.267828	-0.0505738	0.00129527	0.595712
Ccrl1	-0.0410094	5.77902	0.199866	0.654829	0.173274	5.77902	3.56612	0.05897	0.0204986	0.0590286	0.675175	0.0752871
Ccrn4l	-0.864286	5.37526	74.1867	7.10675e-18	-0.0289898	5.37526	0.082784	0.773559	0.287988	-0.0150136	0	0.788172
Ccser2	6.46075	4.59293	679.326	9.36385e-150	0.134895	4.59293	0.154645	0.694135	-0.979894	0.00208056	0	0.713182
Cct2	0.151463	9.35372	9.37086	0.00220462	-0.0104647	9.35372	0.0447571	0.832451	-0.0489784	-0.00517326	0.00353041	0.843214
Cct4	-0.0841439	7.04379	1.41892	0.233582	0.069735	7.04379	0.974545	0.323549	0.0327433	0.0220271	0.262934	0.355738
Cct5	-0.0837346	8.7717	2.62756	0.105023	0.020293	8.7717	0.154338	0.694423	0.0324525	0.00569273	0.126998	0.71342
Ccz1	-0.0642958	6.30799	0.649364	0.42034	-0.00222165	6.30799	0.00077419	0.977802	0.0270407	-0.00243096	0.449626	0.979188
Cd109	-0.229911	4.82331	2.57249	0.108736	0.24387	4.82331	2.89162	0.0890413	0.0866748	0.0822327	0.131183	0.109781
Cd14	0.386559	5.17101	12.5587	0.000394358	-0.0634579	5.17101	0.338565	0.560659	-0.128772	-0.0239259	0.000707845	0.586906
Cd151	0.712837	4.1382	20.7852	5.13786e-06	0.0227654	4.1382	0.0192907	0.889536	-0.228647	0.0121862	1.46856e-05	0.896937
Cd164l2	4.79298	3.71642	220.822	5.98612e-50	-0.607855	3.71642	3.00449	0.0830343	-0.930408	-0.0300753	0	0.103028
Cd2	0.00375464	3.47696	0.000382861	0.984389	-0.019133	3.47696	0.00895355	0.924614	-0.00810882	-0.0161643	0.985397	0.929682
Cd200	0.251819	6.8525	8.7851	0.00303701	-0.0202367	6.8525	0.0567388	0.811727	-0.082627	-0.00782125	0.00484037	0.823526
Cd22	-1.10073	4.44846	19.7255	8.93989e-06	0.0558985	4.44846	0.0520432	0.819545	0.340172	-0.000246377	2.05598e-05	0.83086
Cd274	0.333411	4.76347	5.07272	0.0243053	-0.1342	4.76347	0.822999	0.364305	-0.108648	-0.047081	0.0329075	0.396443
Cd2ap	0.0730131	7.98906	1.95806	0.161721	-0.0803581	7.98906	2.37187	0.123539	-0.021601	-0.0293208	0.188348	0.148136
Cd2bp2	1.01299	3.06867	24.8425	6.22093e-07	-0.128281	3.06867	0.385695	0.534571	-0.334344	-0.0340871	0	0.561976
Cd300ld	-8.31591	4.18112	618.983	1.24458e-136	0.710593	4.18112	2.57365	0.108657	0.997449	0.00255102	0	0.131668
Cd300lg	-0.0710738	4.13185	0.229051	0.632229	0.0316624	4.13185	0.0455831	0.830935	0.0153248	0.00397545	0.653743	0.841883
Cd320	0.0624997	7.28698	0.809521	0.368262	0.0799614	7.28698	1.32501	0.249694	-0.0184591	0.0264905	0.398687	0.281452
Cd33	0.200477	3.18755	1.2058	0.272166	0.289717	3.18755	2.51199	0.112983	-0.0628001	0.095334	0.302626	0.13637
Cd3eap	-0.404175	3.52461	6.95619	0.00835299	-0.0241991	3.52461	0.0244394	0.875772	0.146486	-0.0118085	0.0122625	0.884093
Cd44	-0.0584357	4.86406	0.225713	0.634721	-0.00858886	4.86406	0.00481724	0.944666	0.0330976	-0.00484984	0.656255	0.948527
Cd47	0.350362	7.68495	22.1878	2.47238e-06	-0.048124	7.68495	0.419224	0.517325	-0.117448	-0.0180986	2.93712e-06	0.545099
Cd48	0.0942542	5.22665	0.826769	0.363209	-0.159415	5.22665	2.36339	0.124212	-0.0298302	-0.058997	0.393767	0.148894
Cd55	-0.109621	6.15135	1.66283	0.197222	-0.0759247	6.15135	0.797859	0.371734	0.0392848	-0.0296294	0.22565	0.403601
Cd59a	0.779938	9.69931	248.811	4.71701e-56	0.00727858	9.69931	0.0218582	0.882465	-0.260112	0.00123849	0	0.890231
Cd59b	-0.507028	4.94718	1.45767	0.227301	-0.0400985	4.94718	0.00888181	0.924916	0.136468	-0.0104586	0.256443	0.929909
Cd63	0.0159285	8.1334	0.0593854	0.80747	0.052804	8.1334	0.652192	0.41933	-0.00299592	0.0167371	0.819802	0.450046
Cd68	-0.118494	9.13999	6.57378	0.0103492	0.000651942	9.13999	0.000200083	0.988714	0.0438659	-0.00179162	0.0150204	0.989476
Cd72	-0.343901	6.78803	34.716	3.81492e-09	0.0307195	6.78803	0.277092	0.598614	0.121288	0.00818549	0	0.623253
Cd74	-0.158476	11.1845	15.6452	7.6406e-05	0.0203126	11.1845	0.257145	0.612089	0.0583013	0.0055935	0.000129233	0.636135
Cd81	-0.454501	2.67836	3.19304	0.0739525	-0.143121	2.67836	0.312458	0.576176	0.157919	-0.0509845	0.0920815	0.601654
Cd82	-0.0353397	5.95815	0.164353	0.68518	-0.0110891	5.95815	0.0161751	0.898797	0.01431	-0.00475481	0.704229	0.90583
Cd84	-0.394198	5.02579	13.3657	0.000256275	0.096973	5.02579	0.810826	0.367876	0.142125	0.0315354	0.000487561	0.399865
Cd86	0.0394643	4.77359	0.106506	0.744157	-0.154326	4.77359	1.62427	0.202497	-0.0125965	-0.0563495	0.760246	0.231944
Cd93	-1.21564	5.69448	185.539	2.99372e-42	-0.0452971	5.69448	0.252883	0.615053	0.390952	-0.0245891	0	0.639017
Cd97	-0.391912	9.40402	63.4083	1.68005e-15	-0.00816057	9.40402	0.0275558	0.868158	0.138314	-0.00422928	0	0.876764
Cdadc1	-0.175342	3.17256	0.804492	0.369754	-0.215156	3.17256	1.20836	0.271657	0.0807134	-0.0675881	0.400176	0.303715
Cdan1	-0.101098	6.54551	2.73021	0.0984662	0.0787184	6.54551	1.65514	0.198261	0.0377279	0.0250656	0.119561	0.227647
Cdc14b	-0.415979	2.92652	2.96593	0.0850358	0.0654522	2.92652	0.0732833	0.786615	0.140342	0.0206256	0.104632	0.800382
Cdc16	0.247322	7.93231	16.0111	6.29733e-05	-0.028848	7.93231	0.218005	0.640564	-0.0818389	-0.0112621	0.000108673	0.662816
Cdc23	-0.000359989	6.24603	1.86405e-05	0.996555	-0.0787597	6.24603	0.911073	0.33983	0.00292678	-0.0304956	0.996619	0.371977
Cdc27	0.0659099	6.72996	0.968971	0.324937	-0.0246447	6.72996	0.135469	0.712827	-0.0205949	-0.0108095	0.355344	0.730784
Cdc37	-0.143655	5.91543	3.7319	0.0533825	-0.0801262	5.91543	1.16081	0.281298	0.0543144	-0.027915	0.0685141	0.313335
Cdc42	0.0323584	10.4799	0.592875	0.441309	0.0360056	10.4799	0.734089	0.391561	-0.0076164	0.0111381	0.470526	0.423174
Cdc42bpb	-0.0753238	7.62187	1.46161	0.226673	-0.0117508	7.62187	0.0355737	0.850399	0.0300373	-0.00540586	0.255752	0.860146
Cdc42ep2	-0.254502	5.97723	9.37456	0.00220017	0.074996	5.97723	0.813834	0.366989	0.0904621	0.0245236	0.00352454	0.398963
Cdc42ep5	-0.0999138	5.42326	0.984926	0.320986	0.0571045	5.42326	0.321523	0.570694	0.0393648	0.0169154	0.351464	0.596337
Cdc42se2	5.67864	5.87772	516.657	2.25917e-114	-0.0865461	5.87772	0.124025	0.724709	-0.958522	0.000855689	0	0.742274
Cdc5l	-0.401875	5.62552	6.45836	0.0110431	-0.142513	5.62552	0.813252	0.367161	0.137833	-0.051906	0.0158692	0.399122
Cdc73	-0.00641765	5.97615	0.00590594	0.938743	0.068779	5.97615	0.674874	0.411358	0.0108848	0.0280947	0.942415	0.44235
Cdca3	2.88029	3.11228	16.2863	5.44555e-05	-0.593178	3.11228	0.844274	0.358177	-0.632345	-0.173363	9.39877e-05	0.390422
Cdca4	0.219063	5.2202	4.33188	0.0374049	0.111239	5.2202	1.11723	0.290515	-0.0728853	0.0391801	0.0494287	0.322774
Cdca7	-0.293692	3.64049	3.26866	0.0706152	0.178983	3.64049	1.21288	0.270762	0.105872	0.0552294	0.0883955	0.302811
Cdca7l	-0.185685	5.40327	2.46449	0.116445	0.121422	5.40327	1.05389	0.304614	0.0659937	0.0390202	0.139431	0.336661
Cdh11	5.82187	4.21819	156.958	5.2267e-36	0.0325015	4.21819	0.00463195	0.945739	-0.95325	0.0123682	0	0.949526
Cdh13	-0.431865	4.80486	9.01067	0.00268408	0.119653	4.80486	0.692749	0.405231	0.150085	0.0421036	0.00428525	0.436315
Cdh23	-0.245534	5.31646	3.24749	0.0715331	-0.186053	5.31646	1.86637	0.171891	0.0840506	-0.0635449	0.089444	0.199885
Cdk10	0.0741616	5.14726	0.425534	0.514188	0.0816768	5.14726	0.516425	0.472371	-0.0206655	0.0252003	0.541384	0.50173
Cdk11b	0.369277	4.61316	4.91132	0.0266812	0.356603	4.61316	4.57652	0.0324129	-0.121638	0.114784	0.036103	0.043672
Cdk13	-2.91842	2.84975	109.308	1.38907e-25	-0.343119	2.84975	1.3291	0.248965	0.768933	-0.0315758	0	0.2807
Cdk14	0.457636	7.72689	60.504	7.34305e-15	-0.0468491	7.72689	0.635083	0.425497	-0.153305	-0.0171614	0	0.456025
Cdk17	-0.196274	7.21524	9.83826	0.00170919	-0.0388156	7.21524	0.384798	0.535046	0.0704694	-0.0150131	0.00276676	0.562381
Cdk18	-0.0861083	4.3766	0.151231	0.697362	0.0672383	4.3766	0.0921747	0.76143	0.0278536	0.0159213	0.716075	0.776767
Cdk2	-0.0344311	4.75286	0.0801833	0.777049	0.149959	4.75286	1.51873	0.217812	0.0157336	0.0510156	0.791403	0.248116
Cdk2ap1	3.87638	4.71386	444.459	1.15893e-98	0.218295	4.71386	1.23286	0.266852	-0.867106	0.016284	0	0.298919
Cdk4	6.93099	5.74557	1583.38	0	0.252434	5.74557	0.800356	0.370987	-0.985111	0.00293291	0	0.402925
Cdk5	-0.00558335	2.80647	0.000956276	0.97533	0.452462	2.80647	3.83608	0.0501607	-0.00287178	0.155865	0.976515	0.0647634
Cdk5rap3	0.206077	7.69508	10.803	0.00101336	0.0137338	7.69508	0.0480081	0.826566	-0.0675473	0.0032141	0.00175052	0.837689
Cdk6	6.11806	4.54065	657.41	5.46534e-145	-0.209356	4.54065	0.352486	0.552709	-0.972475	-0.00689954	0	0.579146
Cdk8	-2.5923	5.4347	275.943	5.75056e-62	-0.088604	5.4347	0.331518	0.564766	0.707455	-0.0224146	0	0.590704
Cdkl2	-0.086661	5.6467	0.692077	0.405459	0.0286461	5.6467	0.0756863	0.783231	0.0307626	0.00920813	0.434958	0.79731
Cdkn1a	-0.23876	6.53364	9.07756	0.00258765	0.017148	6.53364	0.0467475	0.828823	0.085878	0.0021334	0.00417071	0.839836
Cdkn1b	0.0120208	6.95701	0.0348747	0.851858	0.114912	6.95701	3.18772	0.0741935	0.000151388	0.0385853	0.861345	0.0929186
Cdkn1c	0.449607	4.84355	0.965633	0.325772	-5.06178	4.84355	107.351	3.72969e-25	-7.97362e-05	-0.916478	0.356152	0
Cdkn2aipnl	0.23725	5.1818	5.52548	0.0187414	-0.0467329	5.1818	0.214285	0.643429	-0.0778578	-0.0160211	0.0258496	0.665639
Cdkn2c	-0.238097	6.70921	13.4567	0.000244127	0.0316866	6.70921	0.23843	0.625343	0.0849218	0.0113704	0.000475813	0.648603
Cdon	-0.393768	7.41295	37.7149	8.18769e-10	0.045426	7.41295	0.502136	0.478563	0.139041	0.0129089	0	0.507851
Cdsn	0.660937	3.29376	17.68	2.61365e-05	-0.0587886	3.29376	0.13952	0.708758	-0.220485	-0.0140379	5.28681e-05	0.726983
Cdt1	0.1891	4.9538	2.22417	0.135866	0.0578599	4.9538	0.207842	0.648464	-0.0609694	0.0175007	0.160258	0.670188
Cdv3	0.851559	7.91577	220.978	5.53359e-50	-0.0853564	7.91577	2.23412	0.134994	-0.282723	-0.0279961	0	0.160408
Cdyl	-0.0440941	4.26915	0.0958139	0.756912	-0.0105689	4.26915	0.00548816	0.940945	0.0168447	-0.00395518	0.772221	0.94502
Cdyl2	-0.147167	4.72052	1.30189	0.253868	-0.023335	4.72052	0.032723	0.85645	0.0521771	-0.0087942	0.283655	0.865783
Ceacam1	0.00490972	5.49377	0.00170418	0.967071	-0.196482	5.49377	2.72563	0.098749	0.000542582	-0.0669002	0.968925	0.120768
Ceacam2	-0.381614	4.14759	4.28464	0.0384581	0.0414032	4.14759	0.050697	0.821855	0.136539	0.017804	0.0507857	0.833113
Cebpa	0.553631	7.14936	78.3769	8.51405e-19	-0.0447929	7.14936	0.513535	0.473613	-0.185661	-0.0170556	0	0.502911
Cebpg	0.263229	8.36955	24.1912	8.72306e-07	0.0711472	8.36955	1.76854	0.183563	-0.0872197	0.0231732	0	0.212251
Cecr2	-0.414796	4.15547	5.40864	0.0200373	-0.0702607	4.15547	0.155396	0.693432	0.142414	-0.0233336	0.0274415	0.712536
Cecr5	0.0656575	4.87641	0.292106	0.588874	-0.0125845	4.87641	0.0107748	0.917327	-0.0206453	-0.00839341	0.612624	0.923053
Cela1	-0.16741	6.61323	4.78508	0.0287073	0.101192	6.61323	1.74883	0.186024	0.0621369	0.0346405	0.0386701	0.214777
Celf2	0.288458	8.26938	27.9918	1.21829e-07	0.0267463	8.26938	0.240922	0.623541	-0.0961194	0.00781522	0	0.646844
Cenpc1	-0.192656	5.52414	3.39862	0.0652511	-0.0239525	5.52414	0.0525088	0.818754	0.0711516	-0.0116392	0.0820895	0.830132
Cenpe	-0.06874	3.64204	0.128814	0.719664	0.251709	3.64204	1.70567	0.191549	0.024031	0.0712606	0.736855	0.220413
Cenpo	-0.61905	5.82726	53.5618	2.50585e-13	0.0812299	5.82726	0.921155	0.337172	0.213569	0.0255718	0	0.369307
Cenpq	0.143742	4.33884	0.969561	0.32479	0.0623954	4.33884	0.182706	0.669058	-0.0439831	0.0226046	0.355209	0.689453
Cep120	0.305748	3.46574	2.32132	0.127612	0.0983411	3.46574	0.241897	0.622839	-0.0969234	0.0415141	0.151444	0.646227
Cep135	0.43282	3.50942	5.34452	0.0207876	-0.368896	3.50942	3.87748	0.0489381	-0.147282	-0.124934	0.0284313	0.0633242
Cep164	0.0706356	2.82445	0.0904089	0.763658	-0.231623	2.82445	0.97591	0.323211	-0.0206268	-0.0832921	0.77875	0.355415
Cep170	-0.112465	6.87747	2.91118	0.0879678	-0.0130863	6.87747	0.039396	0.842666	0.0426609	-0.00481035	0.107883	0.852883
Cep170b	-0.0365843	5.17546	0.0864842	0.768695	0.020437	5.17546	0.0271238	0.869186	0.0155024	0.00989105	0.783385	0.877754
Cep19	-0.64853	3.70353	12.5909	0.00038763	-0.068588	3.70353	0.141355	0.706938	0.21708	-0.0208278	0.000693159	0.725353
Cep192	-0.0865686	7.25221	1.7097	0.191024	0.0941231	7.25221	2.02113	0.155124	0.0326325	0.0310808	0.219165	0.182075
Cep250	-0.0602041	7.38625	1.01519	0.313663	-0.0313326	7.38625	0.275036	0.599974	0.0251911	-0.0130003	0.344086	0.624537
Cep290	0.110947	6.39871	1.11227	0.29159	-0.0117892	6.39871	0.0125516	0.910796	-0.0320135	-0.00414647	0.322307	0.917103
Cep44	-0.200534	4.44306	1.27015	0.259739	-0.188537	4.44306	1.12925	0.287936	0.0590549	-0.0791853	0.289732	0.320196
Cep63	0.32277	5.81563	8.26573	0.00404003	-0.370588	5.81563	10.8921	0.00096577	-0.104614	-0.124524	0.00632949	0.00157429
Cep68	-0.0435607	6.44443	0.398087	0.528079	0.0475529	6.44443	0.474421	0.49096	0.0191485	0.0154901	0.554748	0.519787
Cep70	-0.995949	5.5046	103.849	2.18304e-24	-0.209234	5.5046	4.57059	0.0325254	0.328678	-0.072012	0	0.0437983
Cep72	1.05843	3.50821	17.6197	2.69779e-05	-0.261769	3.50821	1.08227	0.29819	-0.333232	-0.0868179	5.87423e-05	0.330367
Cep76	0.167778	5.08349	2.00186	0.157107	0.00519475	5.08349	0.00191223	0.96512	-0.0535082	0.00246841	0.183335	0.967228
Cep85	0.399557	3.25955	2.70248	0.100192	-0.139142	3.25955	0.326057	0.56799	-0.13075	-0.0332865	0.121529	0.593726
Cep85l	0.323883	4.2351	5.284	0.0215222	-0.301845	4.2351	4.58596	0.0322348	-0.118481	-0.111683	0.0293976	0.0434987
Cep97	0.825041	5.25041	74.5409	5.93946e-18	-0.15224	5.25041	2.52562	0.112011	-0.270459	-0.0497224	0	0.135357
Cerk	-0.217123	7.77506	15.6487	7.6264e-05	0.0215159	7.77506	0.153831	0.694901	0.0778221	0.0056332	0.000129233	0.71391
Cers5	-0.037379	7.7741	0.30508	0.580715	-0.0213508	7.7741	0.0995573	0.752362	0.0163613	-0.00890484	0.604973	0.768182
Cetn3	-9.7341	6.93355	2884.88	0	-0.608827	6.93355	1.87954	0.170387	0.998268	-0.000878734	0	0.198417
Cfb	0.164645	10.5456	14.2707	0.000158307	0.0397861	10.5456	0.83366	0.361216	-0.0535408	0.0122938	0.000314271	0.393298
Cfdp1	-0.0786546	4.23561	0.210695	0.646223	-0.0268628	4.23561	0.0243711	0.875944	0.0386407	-0.00697215	0.667201	0.884239
Cfh	-4.63134	6.51227	364.509	2.9365e-81	-0.138465	6.51227	0.387577	0.533576	0.916958	-0.00344106	0	0.561019
Cfl2	0.0202325	7.42959	0.0583284	0.809158	-0.0622928	7.42959	0.552688	0.457221	-0.00348063	-0.0223441	0.821406	0.487318
Cflar	-2.24104	4.3799	133.451	7.2023e-31	-0.0388927	4.3799	0.039657	0.842153	0.64672	-0.00343959	0	0.852439
Cgnl1	-0.0519157	9.37527	1.39703	0.237222	0.0547103	9.37527	1.55146	0.212919	0.0215837	0.0175667	0.26657	0.243076
Cgrrf1	0.213299	5.19862	3.96096	0.046567	-0.0902948	5.19862	0.70896	0.399789	-0.0753185	-0.0332483	0.0606955	0.431022
Chac1	-0.0412639	4.96089	0.152024	0.696609	-0.178313	4.96089	2.84138	0.0918652	0.0163513	-0.0652799	0.715317	0.112853
Chad	0.0142107	3.76741	0.00421932	0.948209	0.268859	3.76741	1.48987	0.222236	-0.00656149	0.0843416	0.951188	0.252707
Champ1	0.138426	5.82053	2.76464	0.0963681	-0.0254748	5.82053	0.0935691	0.759688	-0.0443291	-0.00872375	0.117273	0.775249
Chchd3	0.226955	5.17078	5.01402	0.0251428	0.137456	5.17078	1.83962	0.174995	-0.0736188	0.046414	0.0339971	0.203231
Chchd6	0.0117169	5.49999	0.0078744	0.92929	0.00380199	5.49999	0.00079209	0.977547	-0.00454671	-0.00608415	0.933571	0.978941
Chd1	0.00909398	6.67749	0.0163076	0.898386	-0.0144022	6.67749	0.0409077	0.839716	0.00105649	-0.00654855	0.904785	0.850001
Chd2	-0.0480463	6.22991	0.390544	0.532014	-0.0097625	6.22991	0.0160965	0.899042	0.020909	-0.000872792	0.558525	0.906077
Chd3	-0.023907	7.46361	0.163948	0.685547	0.0209212	7.46361	0.12557	0.72307	0.0120812	0.00647899	0.704532	0.740705
Chd4	-0.0167622	8.91522	0.0808156	0.776195	-0.0604263	8.91522	1.05015	0.305472	0.009308	-0.0222447	0.790584	0.337501
Chd6	-0.262152	3.21147	1.42785	0.232116	-0.213927	3.21147	0.954564	0.32856	0.0856958	-0.087123	0.261456	0.360872
Chd7	-0.157842	3.52746	0.691903	0.405518	-0.155034	3.52746	0.671373	0.412573	0.0421378	-0.0608413	0.434999	0.443505
Chd8	0.00638752	6.35345	0.00725269	0.932132	-0.0175286	6.35345	0.0546057	0.815234	0.000929246	-0.00742679	0.936206	0.826845
Chi3l1	-1.24753	5.33742	113.339	1.81904e-26	0.127569	5.33742	1.20199	0.272924	0.412389	0.0481061	0	0.30504
Chic2	0.492319	4.27151	9.34844	0.00223175	-0.110402	4.27151	0.470437	0.492786	-0.164877	-0.0404696	0.00358034	0.521491
Chmp1a	-0.165431	7.57946	6.87148	0.00875821	-0.0170147	7.57946	0.0727099	0.787431	0.0609329	-0.00726068	0.0128352	0.801122
Chmp2a	-0.0255766	7.36369	0.137379	0.710901	0.0485444	7.36369	0.49489	0.481754	0.0121836	0.0152364	0.728795	0.510955
Chmp4b	-1.02828	7.98406	39.8202	2.78445e-10	0.0569784	7.98406	0.12462	0.724077	0.332825	0.0143856	0	0.741672
Chmp5	-0.29419	6.31986	10.5035	0.00119148	0.0961703	6.31986	1.12334	0.2892	0.104162	0.0308273	0.0020413	0.321412
Chp1	-0.130654	11.1703	11.8811	0.000567058	0.0188765	11.1703	0.248074	0.618434	0.0487135	0.00510873	0.00100156	0.642015
Chpf	0.014508	5.63627	0.0277803	0.867626	0.0233772	5.63627	0.0721156	0.788281	-0.000661502	0.00696987	0.876118	0.801959
Chpf2	0.0954777	6.22768	1.55731	0.21206	0.130508	6.22768	2.90977	0.0880444	-0.0289038	0.0430775	0.240676	0.108594
Chpt1	0.187321	11.4285	21.5911	3.37407e-06	0.027656	11.4285	0.470909	0.492569	-0.0613317	0.00803684	8.81135e-06	0.5213
Chrd	-0.214582	4.04074	2.08555	0.148698	0.0815482	4.04074	0.300635	0.583485	0.0743144	0.0253042	0.1743	0.608788
Chrnb1	-0.0165222	4.16438	0.00835034	0.92719	0.0559133	4.16438	0.0954611	0.757346	0.0127552	0.0258302	0.931583	0.773064
Chst14	0.132896	4.21453	0.759086	0.383615	0.250447	4.21453	2.69531	0.100644	-0.041708	0.0863299	0.413796	0.122842
Chst2	-2.97143	6.27112	210.194	1.24611e-47	0.272087	6.27112	1.91787	0.166092	0.75717	0.0355488	0	0.193718
Chst3	0.800672	2.82454	18.1637	2.02707e-05	-0.00654639	2.82454	0.0012579	0.971707	-0.267729	0.00630249	3.81825e-05	0.973387
Chsy1	-2.00552	4.73268	198.721	3.97075e-45	0.0639387	4.73268	0.201995	0.653115	0.602902	0.0101671	0	0.674523
Chtf8	4.39932	3.48726	274.834	1.00311e-61	-0.548778	3.48726	3.26408	0.0708127	-0.901445	-0.0290328	0	0.0890005
Chtop	-0.0206648	5.61891	0.0473668	0.82771	0.113906	5.61891	1.43884	0.230328	0.00865252	0.0367291	0.838535	0.261145
Chuk	-9.40256	5.38885	273.711	1.76281e-61	-1.21388	5.38885	4.05237	0.0441093	0.994919	-0.0050813	0	0.0577437
Cib2	-0.129807	6.2028	2.34025	0.126069	-0.0559587	6.2028	0.435088	0.509503	0.0469203	-0.0226222	0.149761	0.537519
Cic	0.222224	3.1102	0.891368	0.345107	-0.177149	3.1102	0.566457	0.45167	-0.0801694	-0.0636961	0.375607	0.482069
Cidec	0.0437716	11.9368	1.20493	0.272338	-0.00958064	11.9368	0.0577208	0.810135	-0.0116692	-0.00471203	0.302781	0.822058
Cit	0.225855	3.49447	1.13139	0.287479	0.00469714	3.49447	0.000526591	0.981692	-0.074249	-0.00268336	0.318222	0.982918
Ckap2l	0.158198	4.36129	1.07004	0.300937	0.0116205	4.36129	0.00575444	0.939532	-0.0554594	0.00619915	0.331489	0.943587
Ckap4	-0.0691763	6.19309	0.815421	0.366522	0.0400654	6.19309	0.273374	0.601077	0.029003	0.0118843	0.396948	0.625477
Ckb	-0.0461448	5.92665	0.242999	0.622048	0.0813935	5.92665	0.755812	0.384642	0.0231542	0.0323258	0.644121	0.416533
Clasp1	0.574763	6.04781	47.5783	5.28497e-12	0.0879481	6.04781	1.11428	0.291153	-0.191468	0.0291441	0	0.323365
Clasrp	0.0364807	3.06969	0.0282727	0.866469	0.309213	3.06969	2.06611	0.150606	-0.0169859	0.107408	0.875023	0.177431
Clca1	0.0126132	3.67014	0.00326705	0.954419	0.110054	3.67014	0.254852	0.613679	0.00932666	0.0393393	0.957098	0.637689
Clcn3	-0.0590424	6.45761	0.653345	0.418919	-0.00086716	6.45761	0.000140609	0.990539	0.0236255	-0.000371863	0.448248	0.991239
Clcn4-2	0.340937	6.71099	24.0722	9.27913e-07	0.0318356	6.71099	0.209975	0.646787	-0.112663	0.00966014	0	0.668726
Clcn6	0.272597	3.59465	2.44915	0.117589	-0.0858114	3.59465	0.243309	0.621826	-0.104329	-0.0447308	0.140703	0.645258
Clcn7	0.426041	6.9459	34.1829	5.01691e-09	-0.0386949	6.9459	0.282266	0.59522	-0.142493	-0.0131671	0	0.620046
Cldn12	0.724182	6.85469	87.8775	6.96352e-21	0.052674	6.85469	0.466478	0.494612	-0.241615	0.0145116	0	0.523165
Cldn15	-0.0237037	4.3325	0.0289307	0.864939	-0.202765	4.3325	2.11537	0.145827	0.0166994	-0.0709643	0.87351	0.172188
Cldn25	0.90763	6.88046	153.026	3.77993e-35	0.132926	6.88046	3.29657	0.0694245	-0.299335	0.0406228	0	0.087438
Clec10a	-0.379218	8.81107	39.7068	2.9509e-10	-0.00556543	8.81107	0.00855536	0.926305	0.13306	-0.00389767	0	0.931263
Clec11a	0.517849	3.23802	8.48573	0.00357943	-0.0261837	3.23802	0.0212019	0.88423	-0.182869	-0.020415	0.00559227	0.89187
Clec1a	-0.113297	5.37861	1.47246	0.224958	-0.0110656	5.37861	0.0140024	0.905805	0.045035	-0.00298408	0.254108	0.912486
Clec1b	1.49203	3.78409	42.1407	8.49387e-11	-0.195862	3.78409	0.738392	0.390177	-0.450825	-0.0545377	0	0.421823
Clec2d	0.573073	3.35708	12.4284	0.000422843	0.329954	3.35708	4.09523	0.0430044	-0.183925	0.110229	0.000760713	0.0564602
Clec3b	0.617024	6.97086	94.1191	2.971e-22	-0.103226	6.97086	2.63394	0.104602	-0.2068	-0.0355584	0	0.127245
Clec4a1	-0.178463	5.98049	3.86686	0.0492486	-0.0196208	5.98049	0.0465379	0.829201	0.067886	-0.00568296	0.0638412	0.840212
Clec4a2	0.448486	7.74639	34.3329	4.64474e-09	0.067111	7.74639	0.770385	0.380098	-0.147978	0.0219961	0	0.411948
Clec4a3	0.874953	5.62487	72.0594	2.08819e-17	-0.0881723	5.62487	0.736187	0.390885	-0.284331	-0.0269452	0	0.422522
Clec4b1	-0.954363	5.60528	73.359	1.08088e-17	-0.126333	5.60528	1.28593	0.256799	0.314521	-0.0457882	0	0.288619
Clec7a	-0.675412	7.44845	64.0267	1.22744e-15	0.00752714	7.44845	0.00808372	0.928359	0.230586	-0.000259916	0	0.933295
Clec9a	0.763638	4.22196	16.224	5.62761e-05	-0.0493245	4.22196	0.0686127	0.793368	-0.247109	-0.0151508	9.9862e-05	0.806758
Clic1	-0.00144319	7.86101	0.000394768	0.984148	0.00364307	7.86101	0.00250326	0.960096	0.00485314	0.00083187	0.985191	0.962675
Clic4	-0.3465	9.97009	55.7009	8.43794e-14	-0.0327428	9.97009	0.498343	0.480229	0.122808	-0.0126746	0	0.509384
Clic5	-0.108235	6.67637	2.59435	0.107246	0.0674161	6.67637	1.00638	0.315771	0.0422877	0.0222374	0.129492	0.347766
Clint1	-0.0154967	7.20643	0.0646802	0.799246	0.0432526	7.20643	0.503909	0.477788	0.00864507	0.0137485	0.812245	0.507093
Clip1	0.0961913	5.57493	0.980201	0.322149	-0.0767363	5.57493	0.623911	0.429598	-0.0289691	-0.0277699	0.352571	0.460052
Clip2	-0.173914	6.5429	6.88798	0.00867771	-0.0202109	6.5429	0.0929522	0.760457	0.063518	-0.00866396	0.0127295	0.77591
Clip3	-0.487451	4.69719	6.4094	0.0113517	-0.354791	4.69719	3.39913	0.0652307	0.165948	-0.117247	0.0162099	0.0826328
Clk1	-0.30688	6.39289	19.2715	1.13384e-05	-0.0362728	6.39289	0.26918	0.603882	0.106642	-0.0153446	2.34969e-05	0.62822
Clk2	-0.0137616	4.89629	0.0130268	0.909131	-0.0770138	4.89629	0.408317	0.522825	0.0061023	-0.0275209	0.914788	0.550486
Clk4	-0.148513	5.28371	1.83587	0.175436	0.0474888	5.28371	0.187966	0.664615	0.0530897	0.016604	0.203013	0.685323
Clmn	0.355001	6.1764	18.0875	2.10983e-05	0.110377	6.1764	1.74867	0.186044	-0.121926	0.0341188	4.11196e-05	0.214794
Clmp	-0.228706	8.28287	20.5665	5.75957e-06	-0.0311263	8.28287	0.381102	0.537014	0.082545	-0.0122514	1.46856e-05	0.564144
Cln3	-0.216539	4.98392	1.58484	0.208065	-0.104419	4.98392	0.368684	0.543723	0.07709	-0.0369033	0.236732	0.570517
Cln6	0.564415	3.38925	5.13978	0.0233836	0.140395	3.38925	0.323539	0.569489	-0.186901	0.0478206	0.0317385	0.595227
Clock	-0.119828	6.8678	2.64045	0.104174	0.112703	6.8678	2.33593	0.12642	0.0457961	0.0388523	0.126079	0.151173
Clp1	0.0626089	4.79226	0.265114	0.606628	-0.100746	4.79226	0.686915	0.407216	-0.0184041	-0.0375414	0.629456	0.438244
Clpb	0.11867	3.31023	0.365341	0.545555	0.175149	3.31023	0.79514	0.37255	-0.0454775	0.0748657	0.571698	0.404485
Clptm1	0.0496118	6.27391	0.520017	0.470835	0.0169882	6.27391	0.060989	0.80494	-0.0137056	0.00489596	0.499304	0.817379
Clstn1	-0.0184139	6.32233	0.0423681	0.83692	0.0767537	6.32233	0.736177	0.390888	0.00984635	0.0260883	0.847208	0.422522
Clstn2	-1.60059	4.75403	109.819	1.07366e-25	0.135212	4.75403	0.784523	0.375761	0.48214	0.0235555	0	0.407551
Cluap1	-0.941759	3.78593	22.5097	2.09086e-06	-0.0092808	3.78593	0.00207814	0.96364	0.31506	0.00954656	2.93712e-06	0.965824
Cluh	0.110051	8.60427	4.47702	0.0343536	-0.0193408	8.60427	0.138286	0.709991	-0.0348062	-0.00825696	0.0455958	0.728105
Clvs1	-0.481435	5.21168	20.8686	4.91895e-06	-0.108766	5.21168	1.06271	0.302598	0.1677	-0.0331431	1.17485e-05	0.334593
Cma1	-0.419691	4.52703	10.8748	0.000974829	-0.0401437	4.52703	0.0989798	0.753057	0.14383	-0.00476099	0.00169472	0.768787
Cmah	0.3629	6.33561	17.9751	2.23819e-05	0.0833186	6.33561	0.94766	0.330316	-0.120837	0.0269022	4.40567e-05	0.362558
Cmas	0.096476	6.89606	2.30784	0.128723	-0.00367546	6.89606	0.00334589	0.953873	-0.0292682	-0.00132668	0.152654	0.95718
Cmbl	-0.0885215	4.01616	0.325571	0.568279	0.096876	4.01616	0.389881	0.532362	0.0327974	0.0305227	0.593198	0.559753
Cmc1	-0.127221	4.80157	0.930037	0.334853	0.152752	4.80157	1.34037	0.24697	0.0470269	0.0494522	0.365321	0.278712
Cmklr1	0.0630998	6.99475	0.882177	0.347606	-0.100339	6.99475	2.23098	0.135268	-0.0165167	-0.0356597	0.378163	0.16066
Cmpk2	-0.316738	3.90995	3.18918	0.0741272	0.185658	3.90995	1.09547	0.295263	0.122905	0.0661962	0.0922548	0.327515
Cmss1	-0.185691	4.49582	1.77442	0.182836	-0.21373	4.49582	2.34882	0.125378	0.071612	-0.0738236	0.210644	0.150081
Cmtm6	-0.162483	7.41386	8.7858	0.00303585	-0.01059	7.41386	0.0373236	0.846808	0.0589616	-0.00544156	0.00484037	0.856854
Cmtm7	0.13372	5.82724	2.66274	0.102724	0.0724305	5.82724	0.781295	0.376745	-0.0417078	0.0252156	0.124328	0.408562
Cnbd2	-0.108399	5.99861	1.90292	0.167751	-0.00851632	5.99861	0.0117298	0.913754	0.0413811	-0.00289837	0.194787	0.919887
Cnep1r1	-0.0679426	4.73508	0.296126	0.586321	0.0555718	4.73508	0.198043	0.656305	0.0276274	0.0159641	0.610204	0.677431
Cnih	-8.28529	5.69172	1524.29	0	-0.775339	5.69172	3.33671	0.0677501	0.993564	-0.00390801	0	0.0856169
Cnih4	-0.0262182	5.47764	0.0889016	0.765578	-0.0920664	5.47764	1.09617	0.295107	0.0126534	-0.0338532	0.780442	0.327359
Cnksr1	0.282258	3.40556	0.9797	0.322273	0.431792	3.40556	2.28868	0.130321	-0.0862927	0.143764	0.352689	0.155271
Cnot1	0.0430801	5.31182	0.0176954	0.894174	0.164308	5.31182	0.256339	0.612646	-0.00734749	0.0510461	0.900761	0.636658
Cnot2	-0.0342694	5.40908	0.12629	0.722311	0.0665327	5.40908	0.475623	0.490412	0.0178691	0.0210863	0.73934	0.519309
Cnot4	-0.0132773	5.42909	0.0219782	0.882145	0.00927855	5.42909	0.0107308	0.917495	0.0111768	0.00253245	0.889506	0.92323
Cnot6	-4.8661	4.48411	485.926	1.09735e-107	0.330109	4.48411	1.66575	0.196828	0.934202	0.0180509	0	0.226096
Cnot6l	0.303508	6.27093	10.8544	0.000985602	-0.0704949	6.27093	0.586037	0.443956	-0.102186	-0.0266555	0.0017094	0.474268
Cnp	0.343004	4.45314	9.3474	0.00223302	-0.148886	4.45314	1.75884	0.18477	-0.114162	-0.0516971	0.00358328	0.213525
Cnpy2	-0.0975833	6.98705	2.07772	0.149463	0.0596793	6.98705	0.777035	0.378049	0.0382344	0.0188125	0.17507	0.40988
Cnpy3	-0.25192	4.75935	4.99852	0.025369	0.0643873	4.75935	0.326549	0.567698	0.0923032	0.0217196	0.0342967	0.593421
Cntd1	0.186244	6.95399	8.65677	0.00325849	0.0340701	6.95399	0.289694	0.590417	-0.0602793	0.0104571	0.00518988	0.615396
Cntln	-0.283222	5.14312	6.81408	0.00904419	0.00120204	5.14312	0.000134253	0.990755	0.10343	0.00126999	0.0132405	0.991438
Cntnap1	0.446517	3.9144	3.77073	0.0521567	0.120066	3.9144	0.271517	0.602316	-0.159712	0.0362128	0.0670602	0.626613
Cntrob	-0.452689	3.96043	6.15011	0.0131404	0.152106	3.96043	0.694267	0.404717	0.153988	0.0460323	0.0185126	0.43583
Cobl	0.303133	3.2883	2.73652	0.098078	-0.233821	3.2883	1.62088	0.20297	-0.113698	-0.0808562	0.11915	0.232526
Cog1	0.286919	2.92039	1.69403	0.19307	0.542137	2.92039	6.08281	0.0136503	-0.0957435	0.185719	0.221385	0.0193967
Cog2	-0.0294965	7.33011	0.18929	0.663508	-0.0722827	7.33011	1.13665	0.286361	0.0138493	-0.0264172	0.683576	0.318551
Cog6	-0.0366327	6.93695	0.266873	0.605437	-0.0572245	6.93695	0.651204	0.419682	0.0163599	-0.0210223	0.628378	0.450374
Coil	0.0365148	5.13205	0.11227	0.737575	0.0356103	5.13205	0.106696	0.743938	-0.0120845	0.0107107	0.754087	0.760143
Col11a2	-1.52674	5.79154	10.7263	0.00105623	0.114476	5.79154	0.062151	0.803128	0.390586	-0.00268725	0.00182689	0.815708
Col12a1	0.135543	5.44172	2.1183	0.145548	-0.0683994	5.44172	0.5399	0.462474	-0.0414827	-0.0283253	0.170931	0.49227
Col14a1	-0.00619958	5.92741	0.00321456	0.954787	-0.057046	5.92741	0.269395	0.603738	0.00880525	-0.0223972	0.957438	0.628079
Col16a1	-0.295536	9.11658	29.2933	6.221e-08	0.0706083	9.11658	1.67394	0.195731	0.105257	0.0226055	0	0.224933
Col1a1	0.296562	8.07273	23.6313	1.16673e-06	0.00269409	8.07273	0.00195434	0.964739	-0.0999218	-0.000753208	0	0.966822
Col1a2	-0.174803	10.0251	17.7615	2.50396e-05	-0.0447203	10.0251	1.16304	0.280837	0.0639369	-0.0170256	4.9931e-05	0.3128
Col20a1	0.635289	3.23137	9.97385	0.00158779	-0.00358023	3.23137	0.000175116	0.989442	-0.210665	-0.000213745	0.00259935	0.990143
Col27a1	0.314482	4.7657	4.95379	0.0260335	0.313159	4.7657	4.90308	0.0268088	-0.107564	0.0972619	0.0352425	0.0366728
Col28a1	2.68314	4.28373	127.68	1.31869e-29	0.0123132	4.28373	0.00161568	0.967937	-0.718107	0.00523086	0	0.969865
Col3a1	2.53465	4.76677	289.806	5.48113e-65	-0.11815	4.76677	0.632587	0.426408	-0.69745	-0.0163919	0	0.456962
Col4a2	-0.0353632	12.4627	0.991642	0.319341	0.0183446	12.4627	0.266856	0.605449	0.0157628	0.00490814	0.349805	0.62965
Col4a3bp	-3.74029	3.59151	257.168	7.10772e-58	0.0987476	3.59151	0.164005	0.685495	0.8718	0.016182	0	0.705049
Col6a3	-0.361965	9.38855	63.7848	1.38783e-15	-0.0130858	9.38855	0.0834779	0.772638	0.128088	-0.00591814	0	0.787376
Col8a1	-0.317466	6.93712	22.2823	2.35361e-06	-0.129416	6.93712	3.70205	0.0543457	0.115833	-0.0439575	2.93712e-06	0.0697095
Colgalt2	-0.568212	3.22785	4.76264	0.029084	0.030395	3.22785	0.0137919	0.906512	0.194382	0.0104491	0.0391988	0.913117
Commd1	-0.100122	4.28166	0.35829	0.549457	0.0215146	4.28166	0.0165752	0.89756	0.0345046	0.00676266	0.575296	0.904714
Commd10	-0.313362	4.7274	4.64201	0.0311985	-0.110808	4.7274	0.580519	0.446109	0.109474	-0.0405594	0.0417658	0.476456
Commd2	0.229066	6.8572	8.62214	0.00332101	0.00887727	6.8572	0.0129299	0.909468	-0.0752425	0.00221941	0.00529268	0.91594
Commd9	0.318939	6.91313	15.7941	7.06222e-05	-0.0101005	6.91313	0.0158891	0.899691	-0.105748	-0.00534966	0.000120422	0.9067
Copb1	0.350086	8.19237	39.5866	3.13829e-10	0.0660618	8.19237	1.41137	0.23483	-0.117043	0.0213938	0	0.265918
Copb2	0.0124431	9.67692	0.0769736	0.781441	0.0142735	9.67692	0.101281	0.750298	-0.00093624	0.00359085	0.795726	0.766047
Coprs	0.158506	4.80189	1.09074	0.296307	0.275029	4.80189	3.28157	0.0700617	-0.0504185	0.0895197	0.326816	0.0882075
Cops2	0.416506	4.67246	11.3483	0.000755164	-0.135753	4.67246	1.2054	0.272245	-0.134529	-0.048497	0.00130408	0.304285
Cops3	0.519512	6.31025	37.7516	8.03499e-10	0.0111197	6.31025	0.017249	0.89551	-0.173026	0.00213889	0	0.902746
Cops5	4.70427	7.60011	2228.41	0	0.167516	7.60011	2.73343	0.098268	-0.925213	0.00833007	0	0.120216
Cops7a	-0.0842827	6.19733	1.11971	0.28998	-0.0614808	6.19733	0.595647	0.440244	0.0335632	-0.022423	0.320721	0.470655
Cops7b	0.109486	3.37917	0.421213	0.516332	-0.263609	3.37917	2.43889	0.11836	-0.021826	-0.0872739	0.543472	0.142485
Cops8	-0.00941194	6.72205	0.0186528	0.891367	-0.00265271	6.72205	0.00148133	0.969299	0.00698014	-0.00132511	0.898117	0.971146
Copz2	0.492165	7.62037	51.0446	9.02918e-13	0.00177395	7.62037	0.000670018	0.979349	-0.164112	-0.000398574	0	0.980727
Coq10a	-0.180746	5.61745	1.93031	0.164725	0.177283	5.61745	1.85611	0.173075	0.0659949	0.0576715	0.191523	0.201216
Coq10b	0.26683	6.00489	8.12864	0.00435713	-0.0228118	6.00489	0.0593966	0.807452	-0.0898826	-0.0103779	0.00670544	0.81967
Coq2	8.12365	4.83187	806.453	2.1334e-177	1.63359	4.83187	10.8656	0.00097965	-0.990695	0.00930508	0	0.00159485
Coq5	0.0242436	6.01423	0.0721522	0.788229	0.066809	6.01423	0.547586	0.459306	-0.00581271	0.0194976	0.801985	0.489335
Coro1a	0.265276	6.26705	8.77211	0.00305871	0.190186	6.26705	4.50903	0.0337164	-0.0883557	0.0647975	0.00487268	0.0452404
Coro1c	2.97691	6.28396	1106.43	1.32383e-242	-0.105126	6.28396	1.28954	0.256134	-0.771412	-0.0147655	0	0.287926
Coro2a	-0.0752766	5.30226	0.44996	0.502354	0.0203295	5.30226	0.0327896	0.856305	0.0280114	0.00609131	0.529756	0.86565
Coro2b	0.0700792	4.87964	0.301852	0.582724	0.191684	4.87964	2.2601	0.132745	-0.0161827	0.0637297	0.606867	0.157782
Coro7	0.00891398	3.36379	0.00273377	0.958301	-0.0141152	3.36379	0.0069074	0.933763	0.0023321	-0.00694328	0.960637	0.938353
Cox14	0.02904	6.97584	0.169385	0.680659	-0.0396906	6.97584	0.316383	0.57379	-0.00720138	-0.0155248	0.699859	0.599242
Cox17	0.18619	3.96668	1.13689	0.286311	0.0741535	3.96668	0.180252	0.671157	-0.0569434	0.0238475	0.317062	0.691556
Cox18	-0.650752	4.35944	12.3612	0.000438354	-0.00464588	4.35944	0.000622947	0.980088	0.217496	-0.00534913	0.000793021	0.981464
Cox19	-0.209682	8.16963	11.6308	0.000648676	0.0155531	8.16963	0.0640402	0.800221	0.0758895	0.00415868	0.0011161	0.81302
Cox7a2	-6.75633	4.47224	525.123	3.25119e-116	-0.238451	4.47224	0.351659	0.553176	0.984266	-0.00270496	0	0.579596
Cox7a2l	9.5651	6.56102	71.7703	2.41765e-17	0.0621606	6.56102	8.59993e-05	0.992601	-0.989227	0.00581206	0	0.993154
Cox8a	8.76362	10.9086	1721.57	0	0.344656	10.9086	4.11024	0.0426244	-0.995088	0.00104289	0	0.056002
Cp	0.0986843	2.70522	0.022833	0.879892	-0.177452	2.70522	0.0719639	0.788499	-0.0171551	-0.0431542	0.88752	0.802126
Cpd	0.168864	7.94637	8.38828	0.00377649	0.0277658	7.94637	0.226796	0.63391	-0.0550682	0.00814371	0.00591242	0.656648
Cpe	-0.600682	5.38679	38.2129	6.34313e-10	0.0518492	5.38679	0.283703	0.594285	0.207861	0.0108068	0	0.619035
Cpeb1	-0.881541	3.80603	33.223	8.21708e-09	0.172816	3.80603	1.26757	0.260223	0.305139	0.0562122	0	0.29224
Cpeb3	2.93763	5.27512	469.348	4.44335e-104	-0.0591529	5.27512	0.180292	0.671122	-0.767063	-0.0055523	0	0.691506
Cpeb4	0.0568584	6.0054	0.355309	0.551123	-0.0519459	6.0054	0.296654	0.585988	-0.0139445	-0.0192163	0.576841	0.611158
Cped1	-0.35722	8.38699	43.9984	3.28646e-11	-0.00188729	8.38699	0.00123308	0.971988	0.126874	-0.00271041	0	0.973634
Cpne1	-0.0196918	8.8589	0.191857	0.661375	-0.0182782	8.8589	0.165298	0.684325	0.010278	-0.00765906	0.681411	0.703962
Cpne8	0.251687	6.34984	7.55456	0.00598585	0.107091	6.34984	1.36896	0.241991	-0.0812074	0.0382285	0.00903751	0.27344
Cpox	0.122364	6.01068	2.12709	0.144715	0.0978241	6.01068	1.35937	0.243647	-0.0394826	0.0322197	0.169986	0.275278
Cpsf1	-0.168143	3.2568	0.734958	0.391281	0.344734	3.2568	3.08547	0.0789945	0.069338	0.115736	0.421182	0.0983552
Cpsf3	0.231287	5.62429	6.05549	0.0138631	0.0602585	5.62429	0.411103	0.52141	-0.0775919	0.0177144	0.0194466	0.549065
Cpsf3l	0.117719	7.43163	3.61761	0.057171	0.0591133	7.43163	0.912291	0.339507	-0.0373471	0.0190489	0.072958	0.371598
Cpsf4	0.259179	4.78514	4.18135	0.0408711	-0.0701376	4.78514	0.306243	0.579995	-0.0843024	-0.0272562	0.0538021	0.605481
Cpsf6	0.000848182	8.03954	0.000221938	0.988114	0.0242203	8.03954	0.180469	0.67097	0.00280823	0.0064295	0.988818	0.6913
Cpt1c	-0.663099	3.38578	5.26073	0.0218119	-0.115576	3.38578	0.163083	0.686334	0.210433	-0.0312937	0.0297853	0.705909
Cpxm1	-0.146776	5.81827	2.4611	0.116697	-0.0366862	5.81827	0.1534	0.695307	0.0576658	-0.0110434	0.139727	0.71431
Cradd	0.601906	3.37489	10.9611	0.000930444	0.0692537	3.37489	0.146202	0.702192	-0.199528	0.0338611	0.00160954	0.720945
Cramp1l	-0.0937103	5.94322	1.03037	0.310072	-0.0118727	5.94322	0.016578	0.897551	0.0354731	-0.00582907	0.340588	0.904702
Crbn	0.0941185	4.83946	0.567768	0.451147	-0.231357	4.83946	3.42977	0.064031	-0.0314259	-0.0815731	0.480039	0.0811936
Creb3	0.344244	7.55659	36.0076	1.96553e-09	-0.0577519	7.55659	1.01415	0.313911	-0.11523	-0.0213271	0	0.345804
Creb3l1	-0.576263	2.89003	6.53911	0.0105528	-0.402277	2.89003	3.18647	0.0742503	0.197387	-0.138622	0.0152466	0.0929685
Creb3l2	-0.293795	5.53548	4.84667	0.0276995	-0.189259	5.53548	2.01509	0.155742	0.099467	-0.0700302	0.037366	0.182791
Crebbp	-0.0911876	5.52534	0.891956	0.344948	0.0592619	5.52534	0.376584	0.539437	0.0330406	0.0192991	0.375431	0.566479
Crebl2	-0.0975137	7.59059	2.57294	0.108705	-0.0531764	7.59059	0.765157	0.381719	0.0373267	-0.0191894	0.131139	0.413596
Crebrf	-0.10039	7.66039	2.9948	0.0835321	-0.044775	7.66039	0.595846	0.440167	0.038307	-0.0182344	0.102837	0.470573
Crebzf	-0.0141221	5.60091	0.0206335	0.885782	-0.0169116	5.60091	0.0295376	0.863544	0.0114714	-0.00672114	0.89288	0.872365
Creg1	0.649751	8.4132	108.779	1.81451e-25	-0.0237611	8.4132	0.146423	0.701977	-0.217515	-0.00892493	0	0.720724
Crim1	0.17025	8.90832	13.3678	0.000255979	-0.0201273	8.90832	0.186892	0.665516	-0.0554172	-0.00866015	0.000487561	0.686166
Crip1	-0.105109	4.20984	0.65985	0.416613	-0.129072	4.20984	0.995129	0.318492	0.0416266	-0.0447206	0.445969	0.350642
Crk	-0.390904	7.01292	35.5455	2.49167e-09	-0.0354903	7.01292	0.292909	0.588362	0.1376	-0.013061	0	0.613414
Crlf3	0.0128083	5.84672	0.0219264	0.882283	-0.0627653	5.84672	0.525955	0.468312	-0.00197043	-0.0232674	0.889626	0.497888
Crnkl1	-0.205888	7.01172	10.0097	0.00155715	0.0941074	7.01172	2.09168	0.148104	0.074745	0.0313942	0.0025641	0.174735
Crot	-0.365366	7.15987	21.6942	3.19759e-06	0.00788118	7.15987	0.0100882	0.919995	0.127858	-0.000653416	8.81135e-06	0.9255
Crtc3	0.0784196	5.65434	0.587846	0.443253	0.174145	5.65434	2.89764	0.0887094	-0.0265961	0.0588663	0.472326	0.109408
Crybg3	-0.162256	7.73977	7.51122	0.00613157	-0.015309	7.73977	0.0668562	0.79597	0.060108	-0.00632029	0.00927835	0.809208
Cs	0.0281104	9.56158	0.359582	0.548739	0.00109355	9.56158	0.000544079	0.981391	-0.00632851	-0.00101913	0.574667	0.98265
Csde1	-0.0406132	7.03997	0.41101	0.521457	-0.00081892	7.03997	0.000166269	0.989712	0.0172118	-0.00193082	0.548445	0.990422
Csf1	0.092042	3.79353	0.341969	0.558695	0.305513	3.79353	3.77337	0.0520747	-0.017357	0.109479	0.584175	0.0670544
Csf1r	0.0192837	8.30023	0.110467	0.739613	-0.00664371	8.30023	0.0131134	0.908831	-0.00349894	-0.00357758	0.756005	0.915299
Csgalnact1	-0.0135425	5.44388	0.0183702	0.892188	-0.107161	5.44388	1.15146	0.283245	0.00816902	-0.0381914	0.898884	0.315291
Csgalnact2	-0.00371292	5.98346	0.00219979	0.962591	-0.054757	5.98346	0.47957	0.488617	0.00587247	-0.020151	0.964746	0.517496
Csnk1a1	0.308383	10.3202	56.8949	4.59742e-14	-0.0440661	10.3202	1.16351	0.280739	-0.10299	-0.0165254	0	0.312727
Csnk1d	-0.105249	6.59467	2.52927	0.111752	-0.0991257	6.59467	2.24363	0.134165	0.0393495	-0.0362943	0.134411	0.159482
Csnk1g1	1.30053	4.58936	99.5309	1.93126e-23	-0.139937	4.58936	1.13492	0.286728	-0.417976	-0.0396741	0	0.318939
Csnk1g3	8.42757	5.37633	1390.45	2.49821e-304	-0.944437	5.37633	4.19593	0.0405212	-0.99434	-0.004037	0	0.0534408
Csnk2a1	-2.26649	4.59827	200.548	1.58584e-45	0.0973687	4.59827	0.366869	0.544716	0.650667	0.0230711	0	0.57146
Csnk2b	0.147365	8.75689	5.4114	0.0200057	0.0689149	8.75689	1.18372	0.276599	-0.0472629	0.0223157	0.0274062	0.308709
Cspg4	-0.574902	3.54576	10.0705	0.0015066	0.262733	3.54576	2.09118	0.148152	0.197977	0.0873119	0.0024848	0.174805
Cspp1	-0.447857	5.53981	22.5985	1.99643e-06	0.0922777	5.53981	0.959166	0.327397	0.153123	0.029607	2.93712e-06	0.35972
Csrnp1	-0.224798	5.00789	3.36539	0.0665798	0.0368757	5.00789	0.0904474	0.763609	0.0777427	0.0109791	0.083652	0.778768
Csrnp2	-0.0990053	4.23376	0.444559	0.50493	0.322818	4.23376	4.73298	0.0295895	0.037575	0.115117	0.532308	0.0401827
Csrp1	-0.963985	9.81569	355.646	2.4984e-79	-0.0379025	9.81569	0.558063	0.455042	0.32493	-0.0128748	0	0.485262
Csrp2	0.103446	7.04702	1.17968	0.277422	-0.101146	7.04702	1.12706	0.288403	-0.0356574	-0.0367983	0.308109	0.32061
Csrp2bp	-0.0484492	5.93909	0.318799	0.57233	-0.0405676	5.93909	0.223447	0.636426	0.0212145	-0.0152805	0.596948	0.658889
Cst3	0.15461	11.3393	16.45	4.9949e-05	-0.00287039	11.3393	0.0056724	0.939964	-0.0500037	-0.00236191	8.81135e-05	0.94398
Cstf3	0.0111667	4.72165	0.00740347	0.931432	0.0884268	4.72165	0.462221	0.496588	-0.00418214	0.0259332	0.935601	0.525027
CT030159.1	0.639097	3.72037	11.5532	0.000676342	-0.0722077	3.72037	0.145826	0.702557	-0.22068	-0.0204906	0.00116897	0.721326
CT030259.1	0.920691	4.00455	24.5722	7.15785e-07	0.058196	4.00455	0.0969158	0.755563	-0.302284	0.0172623	0	0.771313
CT030702.1	0.215643	4.0898	2.40085	0.121269	-0.00584348	4.0898	0.00175684	0.966567	-0.0761474	-0.00406823	0.14458	0.968608
CT033755.1	-0.278092	4.39396	3.94033	0.0471415	0.0800579	4.39396	0.325398	0.568382	0.100437	0.0280891	0.061327	0.594108
Ctage5	-0.340176	7.04884	27.4352	1.62447e-07	0.00792001	7.04884	0.014863	0.902967	0.119865	0.00103605	0	0.90991
Ctc1	0.201082	6.37739	4.26685	0.0388629	0.0113155	6.37739	0.0134969	0.907513	-0.0650076	0.00235525	0.0512821	0.914063
Ctdnep1	-0.0258358	6.19873	0.0800941	0.77717	0.0147717	6.19873	0.0261747	0.871474	0.0127949	0.00306046	0.791538	0.880086
Ctdp1	-0.187128	6.04324	3.71505	0.0539242	-0.0643155	6.04324	0.439186	0.507516	0.0685165	-0.0255093	0.0691162	0.535674
Ctdsp1	0.00760107	7.12134	0.0153945	0.901256	0.0524248	7.12134	0.731952	0.392251	0.000625578	0.0161008	0.907572	0.423861
Ctdsp2	0.251913	8.29351	17.7482	2.52156e-05	0.0520583	8.29351	0.758582	0.383773	-0.0832725	0.0159717	4.9931e-05	0.415658
Ctdspl2	0.00634746	6.03564	0.00524047	0.942291	0.0344961	6.03564	0.155526	0.69331	0.00470437	0.014622	0.945605	0.712421
Ctgf	0.267598	6.47135	13.2292	0.000275619	0.0358668	6.47135	0.238378	0.62538	-0.0897704	0.0145164	0.00051987	0.648645
Ctif	-0.100633	6.16202	1.4733	0.224826	-0.132997	6.16202	2.5737	0.108653	0.0391636	-0.0507248	0.253972	0.131668
Ctla2a	-0.575598	7.23367	51.4983	7.16577e-13	-0.111916	7.23367	1.9522	0.16235	0.199756	-0.0372231	0	0.189729
Ctla2b	1.21441	4.7857	62.2808	2.9782e-15	0.197324	4.7857	1.64061	0.200241	-0.39244	0.0554669	0	0.229709
Ctnna1	-0.000694461	7.56558	0.000107842	0.991714	0.0449859	7.56558	0.450958	0.50188	0.00380705	0.0142112	0.992234	0.5301
Ctnnbip1	0.211917	6.26892	7.18522	0.00735065	0.0136494	6.26892	0.0298283	0.86288	-0.0692352	0.00575582	0.0109349	0.871719
Ctnnd1	0.0678777	6.34142	0.666184	0.414385	-0.0647534	6.34142	0.60638	0.436154	-0.019059	-0.0247081	0.44359	0.466602
Ctps	-0.339148	3.74455	4.2327	0.0396524	0.11371	3.74455	0.475562	0.49044	0.116056	0.0286126	0.0522836	0.519347
Ctr9	0.00818228	6.68255	0.00923011	0.923462	-0.028546	6.68255	0.1122	0.737653	-0.000744821	-0.0122643	0.928029	0.754234
Ctsc	1.21876	5.98841	166.357	4.62249e-38	-0.0191646	5.98841	0.0417952	0.838011	-0.388038	-0.00054809	0	0.84838
Ctsd	-0.0301386	12.2214	0.705613	0.400904	0.00425906	12.2214	0.0140911	0.905508	0.0139306	5.11398e-05	0.430393	0.912227
Ctsf	-0.653322	8.33688	132.982	9.12143e-31	0.0320344	8.33688	0.321343	0.570801	0.225363	0.00892128	0	0.596443
Ctsh	0.355641	8.42628	32.3215	1.30657e-08	0.398347	8.42628	40.5371	1.92919e-10	-0.116235	0.133592	0	0
Ctso	0.0534468	5.3823	0.315407	0.574381	0.132021	5.3823	1.92811	0.164966	-0.00978038	0.0502905	0.598966	0.192481
Cttn	-0.0899397	8.85555	2.85257	0.0912282	0.0675819	8.85555	1.61071	0.204392	0.0345078	0.0217831	0.111622	0.2341
Ctu1	-0.15789	3.79568	0.786954	0.375023	0.232899	3.79568	1.71011	0.190971	0.0654471	0.0806155	0.405346	0.21979
Ctu2	-0.100159	7.21655	2.25571	0.133122	0.0200511	7.21655	0.090403	0.763665	0.0384957	0.00605673	0.15735	0.778838
Cuedc1	0.492812	6.30811	37.4324	9.46359e-10	0.127281	6.30811	2.49857	0.11395	-0.165556	0.043129	0	0.137436
Cul4a	-0.264239	8.74972	30.915	2.69581e-08	-0.0424367	8.74972	0.798049	0.371677	0.0946744	-0.0160691	0	0.403533
Cul7	0.339111	3.46137	1.83935	0.175027	-0.200839	3.46137	0.638644	0.424202	-0.112044	-0.0636902	0.202599	0.454833
Cul9	-0.227897	4.79491	2.4233	0.119543	-0.0967639	4.79491	0.437089	0.508531	0.0842229	-0.0346503	0.142764	0.536573
Cuta	-0.0582091	6.55838	0.5606	0.454019	0.0194983	6.55838	0.0628741	0.80201	0.0237107	0.00522798	0.482912	0.814674
Cux1	-0.629449	6.23371	54.3683	1.66219e-13	0.0279569	6.23371	0.107094	0.743477	0.217086	0.00681937	0	0.759703
Cwc27	0.143937	3.94493	0.462129	0.496631	0.304628	3.94493	2.06922	0.150299	-0.0454307	0.101904	0.52429	0.177123
Cx3cr1	-0.152373	4.78742	1.47996	0.223781	-0.0773887	4.78742	0.38158	0.536759	0.0562634	-0.0307678	0.252874	0.563879
Cxcl10	2.265	5.1432	69.9857	5.97361e-17	0.259033	5.1432	0.960286	0.327115	-0.611314	0.0488099	0	0.359418
Cxcl11	2.34207	4.51322	176.391	2.97481e-40	-0.00777425	4.51322	0.00113132	0.973168	-0.671448	-0.00444627	0	0.974703
Cxcl14	-0.362367	5.16211	5.58109	0.0181554	0.102595	5.16211	0.449315	0.502661	0.13184	0.0349855	0.0251858	0.530816
Cxcl16	0.550845	7.35261	59.8202	1.03932e-14	0.000296218	7.35261	1.58171e-05	0.996827	-0.184549	0.000225145	0	0.997092
Cxcl9	0.639092	6.25159	54.3314	1.6937e-13	-0.136699	6.25159	2.49104	0.114496	-0.208251	-0.0416748	0	0.138086
Cxcr4	0.594205	4.92221	31.887	1.63406e-08	0.136586	4.92221	1.67827	0.195154	-0.200474	0.043701	0	0.224322
Cxcr6	0.0928579	4.6557	0.519346	0.471121	0.160217	4.6557	1.54574	0.213766	-0.0301881	0.0567908	0.499542	0.243916
Cxcr7	0.404486	5.80137	19.8718	8.28142e-06	0.100511	5.80137	1.22754	0.267886	-0.135428	0.0337097	1.76227e-05	0.299856
Cxxc1	0.0997852	4.73355	0.715992	0.397462	-0.101633	4.73355	0.741884	0.389058	-0.0331518	-0.0347997	0.426939	0.420824
Cxxc5	0.205971	3.71431	1.53296	0.215669	-0.0277126	3.71431	0.027829	0.867511	-0.0766804	-0.016417	0.244524	0.876151
[truncated: 4,935 more rows]

## Sheet: WAT_LowFat
genes	AG_logFC	AG_logCPM	AG_LR	AG_pval	PO_logFC	PO_logCPM	PO_LR	PO_pval	AGE	POE	AG_adj_pval	PO_adj_pval
[truncated: 6,557 more rows]

[truncated: 6 more sheets: WAT_Females, WAT_Males, WAT_HF, WAT_HM, WAT_LF, WAT_LM]
