# Supplementary material for: Genetic, epigenetic, and environmental mechanisms govern allele-specific gene expression
Source: HighWire-hosted journal article supplement (doi:10.1101/gr.276193.121), 2022-05-02
Supplement: Supplemental_Table_S9.xlsx [file Supplemental_Table_S9.xlsx]

## Sheet: Pyrosequencing Primers
Supplemental Table S9: Primer sequences used in pyrosequencing.
Forward and reverse primer sequences for pyrosequencing of our selected genes. The length, chromosomal location in each strain’s genome, and number of SNPs captured in each amplified PCR product are also included. All reverse primers are biotinylated at the 5’ end (*). All forward primers were used as the sequencing primer.
ASE Class	Genes	Forward (5' - 3')	Reverse* (5' - 3')	PCR Product Length (bp)	Number of SNPs	LG/J Genome Location (bp)	SM/J Genome Location (bp)
Parent-of-Origin	Apob	CAAGTCCACGTCATCCCCAA	GGGGCTGGACACTTCAATCA	190	1	Chr 12: 7988415 - 7989325	Chr 12: 7988048 - 7988958
Parent-of-Origin	Grb10	GTTTACACAGACCGGTCCCC	CGTCAAACCAGCTACGTACG	159	1	Chr 11: 11931721 - 11931563	Chr 11: 11931502 - 11931344
Parent-of-Origin	Peg3	GACACAAGGCCACTCATCGA	TTGCTCTTCCGGATTTGGGG	188	1	Chr 7: 6711829 - 6711523	Chr 7: 6712313 - 6712007
Parent-of-Origin	Slc22a3	GCGGCAAGCAATATAGTGGC	CACAAGCCTGAGCAGAGTGA	200	1	Chr 17: 12433888 - 12426045	Chr 17: 12434143 - 12426305
Sequence	Cidec	GAACGTGAAGGCAACCCTCT	CTGTTCTTCCTCGGTGGCAT	184	1	Chr 6: 113430690 - 113428109	Chr 6: 113431855 - 113429275
Sequence	Eef1a1	ATTGATGCCCCAGGACACAG	TCAGCTGTTTCACACCCAGG	178	1	Chr 9: 78483941 - 78483672	Chr 9: 78482256 - 78481985
Sequence	Gas1	TCACACTTGTAGCTCCTGCG	CAGAAGAGGGCCGAACATGT	184	1	Chr 13: 60178093 - 60177910	Chr 13: 60177707 - 60177524
Sequence	Ifi205	AAGAAGCAGGTCCTGCAACA	GGTCCTTCACAACAGGGAGG	193	6	Chr 1: 174038910 - 174038212	Chr 1: 174038606 - 174037908
Sequence	Mettl7b	CCATCTGCAGCCAGAAGTCA	CGGTCCTAGAAAGGGGTTGG	181	2	Chr 10: 128965902 - 128965722	Chr 10: 128963913 - 128963733
Sequence	Ociad2	GCGCTGGAAGGAAGAGGAAG	GGGCAAAACAACAGGCTCTG	196	3	Chr 5: 73340620 - 73334210	Chr 5: 73340846 - 73334447
Sequence	Stab2	AGGACATGTACCTGCAAGCC	TGAAGGCACAAACACGGTGA	171	3	Chr 10: 86882830 - 86877782	Chr 10: 86880192 - 86875148
Sequence	Tubb2a	CCAGCAGATGTTCGACTCCA	CTCCACGAAGTAGCTGCTGT	160	1	Chr 13: 34075969 - 34075810	Chr 13: 34076336 - 34076177
Sequence	Upp2	GGCATCCCCTCCATTTCCAT	GACCTGCTCAAATCGAGGCT	180	2	Chr 2: 58775169 - 58778925	Chr 2: 58776347 - 58780100
